# Supplementary material for: Controlling Pd(iv) reductive elimination pathways enables Pd(ii)-catalysed enantioselective C(sp3)−H fluorination
Source: Springer Nature journal article supplement (doi:10.1038/s41557-018-0048-1), 2018-06-08
Supplement: 41557_2018_48_MOESM145_ESM.mol [file 41557_2018_48_MOESM145_ESM.mol]

nchem.17061263C-comp3f.mol
  ChemDraw03211811282D

 14 14  0  0  1  0  0  0  0  0999 V2000
   -0.7143    0.4125    0.0000 C   0  0  0  0  0  0  0  0  0  0  0  0
   -0.7143   -0.4125    0.0000 C   0  0  0  0  0  0  0  0  0  0  0  0
    0.0002   -0.8249    0.0000 C   0  0  0  0  0  0  0  0  0  0  0  0
    0.7147   -0.4125    0.0000 C   0  0  0  0  0  0  0  0  0  0  0  0
    0.7147    0.4125    0.0000 C   0  0  0  0  0  0  0  0  0  0  0  0
    0.0002    0.8249    0.0000 C   0  0  0  0  0  0  0  0  0  0  0  0
    1.4287    0.8249    0.0000 C   0  0  0  0  0  0  0  0  0  0  0  0
    1.4287    1.6499    0.0000 O   0  0  0  0  0  0  0  0  0  0  0  0
    1.4287   -0.8249    0.0000 C   0  0  0  0  0  0  0  0  0  0  0  0
    2.1432   -0.4125    0.0000 F   0  0  0  0  0  0  0  0  0  0  0  0
    1.4287   -1.6499    0.0000 C   0  0  0  0  0  0  0  0  0  0  0  0
   -1.4287    0.8249    0.0000 N   0  3  0  0  0  0  0  0  0  0  0  0
   -1.4287    1.6499    0.0000 O   0  0  0  0  0  0  0  0  0  0  0  0
   -2.1432    0.4125    0.0000 O   0  5  0  0  0  0  0  0  0  0  0  0
  9 11  1  0      
 12 13  2  0      
 12 14  1  0      
  1 12  1  0      
  1  2  2  0      
  2  3  1  0      
  3  4  2  0      
  4  5  1  0      
  5  6  2  0      
  6  1  1  0      
  5  7  1  0      
  7  8  2  0      
  4  9  1  0      
  9 10  1  6      
M  CHG  2  12   1  14  -1
M  STY  1   1 SUP
M  SLB  1   1   1
M  SAL   1  1  11
M  SBL   1  1   1
M  SMT   1 Me
M  SBV   1   1    0.0000    0.8249
M  STY  1   2 SUP
M  SLB  1   2   2
M  SAL   2  3  12  13  14
M  SBL   2  1   4
M  SMT   2 ^NO2
M  SBV   2   4    0.7145   -0.4125
M  END
