# Supplementary material for: Controlling Pd(iv) reductive elimination pathways enables Pd(ii)-catalysed enantioselective C(sp3)−H fluorination
Source: Springer Nature journal article supplement (doi:10.1038/s41557-018-0048-1), 2018-06-08
Supplement: 41557_2018_48_MOESM173_ESM.mol [file 41557_2018_48_MOESM173_ESM.mol]

nchem.17061263C-comp3k.mol
  ChemDraw03211811282D

 12 12  0  0  1  0  0  0  0  0999 V2000
   -1.4290    0.4125    0.0000 C   0  0  0  0  0  0  0  0  0  0  0  0
   -1.4290   -0.4125    0.0000 C   0  0  0  0  0  0  0  0  0  0  0  0
   -0.7145   -0.8249    0.0000 C   0  0  0  0  0  0  0  0  0  0  0  0
   -0.0000   -0.4125    0.0000 C   0  0  0  0  0  0  0  0  0  0  0  0
   -0.0000    0.4125    0.0000 C   0  0  0  0  0  0  0  0  0  0  0  0
   -0.7145    0.8249    0.0000 C   0  0  0  0  0  0  0  0  0  0  0  0
    0.7145    0.8249    0.0000 C   0  0  0  0  0  0  0  0  0  0  0  0
    0.7145    1.6499    0.0000 O   0  0  0  0  0  0  0  0  0  0  0  0
    0.7145   -0.8249    0.0000 C   0  0  0  0  0  0  0  0  0  0  0  0
    1.4290   -0.4125    0.0000 F   0  0  0  0  0  0  0  0  0  0  0  0
   -0.7145    1.6499    0.0000 F   0  0  0  0  0  0  0  0  0  0  0  0
    0.7145   -1.6499    0.0000 C   0  0  0  0  0  0  0  0  0  0  0  0
  9 12  1  0      
  1  2  2  0      
  2  3  1  0      
  3  4  2  0      
  4  5  1  0      
  5  6  2  0      
  6  1  1  0      
  5  7  1  0      
  7  8  2  0      
  4  9  1  0      
  9 10  1  6      
  6 11  1  0      
M  STY  1   1 SUP
M  SLB  1   1   1
M  SAL   1  1  12
M  SBL   1  1   1
M  SMT   1 Me
M  SBV   1   1    0.0000    0.8249
M  END
