# Supplementary material for: Controlling Pd(iv) reductive elimination pathways enables Pd(ii)-catalysed enantioselective C(sp3)−H fluorination
Source: Springer Nature journal article supplement (doi:10.1038/s41557-018-0048-1), 2018-06-08
Supplement: 41557_2018_48_MOESM189_ESM.mol [file 41557_2018_48_MOESM189_ESM.mol]

nchem.17061263C-comp3o.mol
  ChemDraw03211811282D

 15 15  0  0  1  0  0  0  0  0999 V2000
   -0.7146    0.4125    0.0000 C   0  0  0  0  0  0  0  0  0  0  0  0
   -0.7146   -0.4125    0.0000 C   0  0  0  0  0  0  0  0  0  0  0  0
   -0.0001   -0.8250    0.0000 N   0  0  0  0  0  0  0  0  0  0  0  0
    0.7145   -0.4125    0.0000 C   0  0  0  0  0  0  0  0  0  0  0  0
    0.7145    0.4125    0.0000 C   0  0  0  0  0  0  0  0  0  0  0  0
   -0.0001    0.8250    0.0000 C   0  0  0  0  0  0  0  0  0  0  0  0
    1.4290    0.8250    0.0000 C   0  0  0  0  0  0  0  0  0  0  0  0
    1.4290    1.6500    0.0000 O   0  0  0  0  0  0  0  0  0  0  0  0
    1.4290   -0.8250    0.0000 C   0  0  0  0  0  0  0  0  0  0  0  0
    2.1435   -0.4125    0.0000 F   0  0  0  0  0  0  0  0  0  0  0  0
   -1.4291   -0.8250    0.0000 C   0  0  0  0  0  0  0  0  0  0  0  0
   -1.8416   -0.1106    0.0000 F   0  0  0  0  0  0  0  0  0  0  0  0
   -2.1435   -1.2375    0.0000 F   0  0  0  0  0  0  0  0  0  0  0  0
   -1.0166   -1.5395    0.0000 F   0  0  0  0  0  0  0  0  0  0  0  0
    1.4290   -1.6500    0.0000 C   0  0  0  0  0  0  0  0  0  0  0  0
 11 12  1  0      
 11 13  1  0      
 11 14  1  0      
  2 11  1  0      
  9 15  1  0      
  1  2  2  0      
  2  3  1  0      
  3  4  2  0      
  4  5  1  0      
  5  6  2  0      
  6  1  1  0      
  5  7  1  0      
  7  8  2  0      
  4  9  1  0      
  9 10  1  6      
M  STY  1   1 SUP
M  SLB  1   1   1
M  SAL   1  4  11  12  13  14
M  SBL   1  1   4
M  SMT   1 ^CF3
M  SBV   1   4    0.7145    0.4125
M  STY  1   2 SUP
M  SLB  1   2   2
M  SAL   2  1  15
M  SBL   2  1   5
M  SMT   2 Me
M  SBV   2   5    0.0000    0.8250
M  END
