# Supplementary material for: Controlling Pd(iv) reductive elimination pathways enables Pd(ii)-catalysed enantioselective C(sp3)−H fluorination
Source: Springer Nature journal article supplement (doi:10.1038/s41557-018-0048-1), 2018-06-08
Supplement: 41557_2018_48_MOESM219_ESM.mol [file 41557_2018_48_MOESM219_ESM.mol]

nchem.17061263C-comp4d.mol
  ChemDraw03211811282D

 13 13  0  0  1  0  0  0  0  0999 V2000
   -1.4290    0.2063    0.0000 C   0  0  0  0  0  0  0  0  0  0  0  0
   -1.4290   -0.6187    0.0000 C   0  0  0  0  0  0  0  0  0  0  0  0
   -0.7145   -1.0313    0.0000 C   0  0  0  0  0  0  0  0  0  0  0  0
    0.0000   -0.6187    0.0000 C   0  0  0  0  0  0  0  0  0  0  0  0
    0.0000    0.2063    0.0000 C   0  0  0  0  0  0  0  0  0  0  0  0
   -0.7145    0.6188    0.0000 C   0  0  0  0  0  0  0  0  0  0  0  0
    0.7146    0.6188    0.0000 C   0  0  0  0  0  0  0  0  0  0  0  0
    0.7146   -1.0313    0.0000 C   0  0  0  0  0  0  0  0  0  0  0  0
    1.4290   -0.6187    0.0000 F   0  0  0  0  0  0  0  0  0  0  0  0
    0.7146    1.4438    0.0000 O   0  0  0  0  0  0  0  0  0  0  0  0
    0.7146   -1.8562    0.0000 C   0  0  0  0  0  0  0  0  0  0  0  0
   -1.4290    1.8562    0.0000 C   0  0  0  0  0  0  0  0  0  0  0  0
   -0.7145    1.4438    0.0000 S   0  0  0  0  0  0  0  0  0  0  0  0
  8 11  1  0      
 12 13  1  0      
  6 13  1  0      
  1  2  2  0      
  2  3  1  0      
  3  4  2  0      
  4  5  1  0      
  5  6  2  0      
  6  1  1  0      
  5  7  1  0      
  4  8  1  0      
  8  9  1  6      
  7 10  2  0      
M  STY  1   1 SUP
M  SLB  1   1   1
M  SAL   1  1  11
M  SBL   1  1   1
M  SMT   1 Me
M  SBV   1   1    0.0000    0.8250
M  STY  1   2 SUP
M  SLB  1   2   2
M  SAL   2  2  12  13
M  SBL   2  1   3
M  SMT   2 Me^S
M  SBV   2   3    0.0000   -0.8250
M  END
