# Supplementary material for: Controlling Pd(iv) reductive elimination pathways enables Pd(ii)-catalysed enantioselective C(sp3)−H fluorination
Source: Springer Nature journal article supplement (doi:10.1038/s41557-018-0048-1), 2018-06-08
Supplement: 41557_2018_48_MOESM243_ESM.mol [file 41557_2018_48_MOESM243_ESM.mol]

nchem.17061263C-comp4h.mol
  ChemDraw03211811282D

 16 18  0  0  1  0  0  0  0  0999 V2000
   -1.4289   -0.2404    0.0000 C   0  0  0  0  0  0  0  0  0  0  0  0
   -1.4289   -1.0654    0.0000 C   0  0  0  0  0  0  0  0  0  0  0  0
   -0.7144   -1.4778    0.0000 C   0  0  0  0  0  0  0  0  0  0  0  0
    0.0000   -1.0654    0.0000 C   0  0  0  0  0  0  0  0  0  0  0  0
    0.0000   -0.2404    0.0000 C   0  0  0  0  0  0  0  0  0  0  0  0
   -0.7144    0.1720    0.0000 C   0  0  0  0  0  0  0  0  0  0  0  0
    0.7145    0.1720    0.0000 C   0  0  0  0  0  0  0  0  0  0  0  0
    0.7145   -1.4778    0.0000 C   0  0  0  0  0  0  0  0  0  0  0  0
    1.4289   -1.0653    0.0000 F   0  0  0  0  0  0  0  0  0  0  0  0
    0.7145    0.9970    0.0000 N   0  0  0  0  0  0  0  0  0  0  0  0
    0.0000    1.4095    0.0000 C   0  0  0  0  0  0  0  0  0  0  0  0
   -0.7144    0.9970    0.0000 N   0  0  0  0  0  0  0  0  0  0  0  0
   -0.1715    2.2165    0.0000 N   0  0  0  0  0  0  0  0  0  0  0  0
   -0.9919    2.3028    0.0000 C   0  0  0  0  0  0  0  0  0  0  0  0
   -1.3275    1.5491    0.0000 N   0  0  0  0  0  0  0  0  0  0  0  0
    0.7145   -2.3028    0.0000 C   0  0  0  0  0  0  0  0  0  0  0  0
  8 16  1  0      
  1  2  2  0      
  2  3  1  0      
  3  4  2  0      
  4  5  1  0      
  5  6  2  0      
  6  1  1  0      
  5  7  1  0      
  4  8  1  0      
  8  9  1  6      
  7 10  2  0      
 10 11  1  0      
 11 12  1  0      
 12  6  1  0      
 11 13  2  0      
 13 14  1  0      
 14 15  2  0      
 15 12  1  0      
M  STY  1   1 SUP
M  SLB  1   1   1
M  SAL   1  1  16
M  SBL   1  1   1
M  SMT   1 Me
M  SBV   1   1    0.0000    0.8249
M  END
