# Supplementary material for: Controlling Pd(iv) reductive elimination pathways enables Pd(ii)-catalysed enantioselective C(sp3)−H fluorination
Source: Springer Nature journal article supplement (doi:10.1038/s41557-018-0048-1), 2018-06-08
Supplement: 41557_2018_48_MOESM249_ESM.cif [file 41557_2018_48_MOESM249_ESM.cif]

data_yu85_b
_audit_creation_date              2017-02-08
_audit_creation_method
;
Olex2 1.2-beta
(compiled 2017.01.04 svn.r3372 for OlexSys, GUI svn.r5292)
;
_shelx_SHELXL_version_number      '2014/7'
_publ_contact_author_address      ?
_publ_contact_author_email        ?
_publ_contact_author_id_orcid     ?
_publ_contact_author_name         ''
_publ_contact_author_phone        ?
_publ_section_references
;
Dolomanov, O.V., Bourhis, L.J., Gildea, R.J, Howard, J.A.K. & Puschmann, H.
 (2009), J. Appl. Cryst. 42, 339-341.

Sheldrick, G.M. (2015). Acta Cryst. C71, 3-8.
;
_chemical_name_common             ?
_chemical_name_systematic         ?
_chemical_formula_moiety          'C16 H12 Br F4 N O'
_chemical_formula_sum             'C16 H12 Br F4 N O'
_chemical_formula_weight          390.18
_chemical_absolute_configuration  ad
_chemical_melting_point           ?
loop_
  _atom_type_symbol
  _atom_type_description
  _atom_type_scat_dispersion_real
  _atom_type_scat_dispersion_imag
  _atom_type_scat_source
 'C' 'C' 0.0033 0.0016 'International Tables Vol C Tables 4.2.6.8 and 6.1.1.4'
 'H' 'H' 0.0000 0.0000 'International Tables Vol C Tables 4.2.6.8 and 6.1.1.4'
 'Br' 'Br' -0.2901 2.4595
 'International Tables Vol C Tables 4.2.6.8 and 6.1.1.4'
 'F' 'F' 0.0171 0.0103 'International Tables Vol C Tables 4.2.6.8 and 6.1.1.4'
 'N' 'N' 0.0061 0.0033 'International Tables Vol C Tables 4.2.6.8 and 6.1.1.4'
 'O' 'O' 0.0106 0.0060 'International Tables Vol C Tables 4.2.6.8 and 6.1.1.4'

_shelx_space_group_comment
;
The symmetry employed for this shelxl refinement is uniquely defined
by the following loop, which should always be used as a source of
symmetry information in preference to the above space-group names.
They are only intended as comments.
;
_space_group_crystal_system       'monoclinic'
_space_group_IT_number            4
_space_group_name_H-M_alt         'P 1 21 1'
_space_group_name_Hall            'P 2yb'
loop_
  _space_group_symop_operation_xyz
 'x, y, z'
 '-x, y+1/2, -z'

_cell_length_a                    4.8611(5)
_cell_length_b                    8.6969(9)
_cell_length_c                    18.604(2)
_cell_angle_alpha                 90
_cell_angle_beta                  97.347(3)
_cell_angle_gamma                 90
_cell_volume                      780.06(14)
_cell_formula_units_Z             2
_cell_measurement_reflns_used     5669
_cell_measurement_temperature     100(2)
_cell_measurement_theta_max       25.564
_cell_measurement_theta_min       2.208
_shelx_estimated_absorpt_T_max    ?
_shelx_estimated_absorpt_T_min    ?
_exptl_absorpt_coefficient_mu     2.679
_exptl_absorpt_correction_T_max   0.2601
_exptl_absorpt_correction_T_min   0.2060
_exptl_absorpt_correction_type    multi-scan
_exptl_absorpt_process_details
'SADABS-2016/2 (Bruker,2016/2) was used for absorption correction. wR2(int) was 0.1127 before and 0.0672 after correction. The Ratio of minimum to maximum transmission is 0.7920. The \l/2 correction factor is Not present.'
_exptl_absorpt_special_details    ?
_exptl_crystal_colour             colourless
_exptl_crystal_colour_primary     colourless
_exptl_crystal_density_diffrn     1.661
_exptl_crystal_density_meas       ?
_exptl_crystal_density_method     ?
_exptl_crystal_description        needle
_exptl_crystal_F_000              388
_exptl_crystal_size_max           0.3
_exptl_crystal_size_mid           0.04
_exptl_crystal_size_min           0.04
_exptl_transmission_factor_max    ?
_exptl_transmission_factor_min    ?
_diffrn_reflns_av_R_equivalents   0.0418
_diffrn_reflns_av_unetI/netI      0.0527
_diffrn_reflns_Laue_measured_fraction_full 0.999
_diffrn_reflns_Laue_measured_fraction_max 0.996
_diffrn_reflns_limit_h_max        4
_diffrn_reflns_limit_h_min        -6
_diffrn_reflns_limit_k_max        10
_diffrn_reflns_limit_k_min        -10
_diffrn_reflns_limit_l_max        23
_diffrn_reflns_limit_l_min        -23
_diffrn_reflns_number             11298
_diffrn_reflns_point_group_measured_fraction_full 1.000
_diffrn_reflns_point_group_measured_fraction_max 0.994
_diffrn_reflns_theta_full         25.242
_diffrn_reflns_theta_max          26.396
_diffrn_reflns_theta_min          2.208
_diffrn_ambient_temperature       100.0
_diffrn_detector                  'Bruker APEX-II CCD'
_diffrn_detector_area_resol_mean  7.9
_diffrn_detector_type             'CCD Area Detector'
_diffrn_measured_fraction_theta_full 0.999
_diffrn_measured_fraction_theta_max 0.996
_diffrn_measurement_device        'Kappa Four-Circle Diffractometer'
_diffrn_measurement_device_type   'Bruker X8 APEX II'
_diffrn_measurement_method        '\w and \f scans'
_diffrn_radiation_monochromator   graphite
_diffrn_radiation_probe           X-ray
_diffrn_radiation_type            MoK\a
_diffrn_radiation_wavelength      0.71073
_diffrn_radiation_xray_symbol     K-L~3~
_diffrn_source                    'sealed tube'
_diffrn_source_type               fine-focus
_diffrn_standards_number          0
_reflns_Friedel_coverage          0.867
_reflns_Friedel_fraction_full     1.000
_reflns_Friedel_fraction_max      0.991
_reflns_number_gt                 2888
_reflns_number_total              3169
_reflns_special_details
;
 Reflections were merged by SHELXL according to the crystal
 class for the calculation of statistics and refinement.
 
 _reflns_Friedel_fraction is defined as the number of unique
 Friedel pairs measured divided by the number that would be
 possible theoretically, ignoring centric projections and
 systematic absences.
;
_reflns_threshold_expression      'I > 2\s(I)'
_computing_cell_refinement        'SAINT v8.37A (Bruker, 2015)'
_computing_data_collection        'APEX2 v2014.11-0 (Bruker, 2014)'
_computing_data_reduction         'SAINT v8.37A (Bruker, 2015)'
_computing_molecular_graphics     'Olex2 (Dolomanov et al., 2009)'
_computing_publication_material   'Olex2 (Dolomanov et al., 2009)'
_computing_structure_refinement   'ShelXL (Sheldrick, 2015)'
_computing_structure_solution     'SHELXT (Sheldrick, 2015)'
_refine_diff_density_max          0.220
_refine_diff_density_min          -0.241
_refine_diff_density_rms          0.045
_refine_ls_abs_structure_details
;
 Flack x determined using 1147 quotients [(I+)-(I-)]/[(I+)+(I-)]
 (Parsons, Flack and Wagner, Acta Cryst. B69 (2013) 249-259).
;
_refine_ls_abs_structure_Flack    0.015(5)
_refine_ls_extinction_coef        .
_refine_ls_extinction_method      none
_refine_ls_goodness_of_fit_ref    0.960
_refine_ls_hydrogen_treatment     constr
_refine_ls_matrix_type            full
_refine_ls_number_parameters      210
_refine_ls_number_reflns          3169
_refine_ls_number_restraints      1
_refine_ls_R_factor_all           0.0352
_refine_ls_R_factor_gt            0.0285
_refine_ls_restrained_S_all       0.960
_refine_ls_shift/su_max           0.000
_refine_ls_shift/su_mean          0.000
_refine_ls_structure_factor_coef  Fsqd
_refine_ls_weighting_details      'w=1/[\s^2^(Fo^2^)] where P=(Fo^2^+2Fc^2^)/3'
_refine_ls_weighting_scheme       calc
_refine_ls_wR_factor_gt           0.0475
_refine_ls_wR_factor_ref          0.0493
_refine_special_details
;
 Refined as a 2-component twin.
;
_olex2_refinement_description
;
1. Twinned data refinement
 Scales: 0.6946(11) 0.3054(11)
2. Fixed Uiso
 At 1.2 times of:
  All C(H) groups, All N(H) groups
 At 1.5 times of:
  All C(H,H,H) groups
3.a Ternary CH refined with riding coordinates:
 C15(H15)
3.b Aromatic/amide H refined with riding coordinates:
 N1(H1), C1(H1A), C2(H2), C4(H4), C5(H5), C9(H9), C11(H11), C12(H12)
3.c Idealised Me refined as rotating group:
 C16(H16A,H16B,H16C)
;
_atom_sites_solution_hydrogens    geom
_atom_sites_solution_primary      ?
_atom_sites_solution_secondary    ?
loop_
  _atom_site_label
  _atom_site_type_symbol
  _atom_site_fract_x
  _atom_site_fract_y
  _atom_site_fract_z
  _atom_site_U_iso_or_equiv
  _atom_site_adp_type
  _atom_site_occupancy
  _atom_site_site_symmetry_order
  _atom_site_calc_flag
  _atom_site_refinement_flags_posn
  _atom_site_refinement_flags_adp
  _atom_site_refinement_flags_occupancy
  _atom_site_disorder_assembly
  _atom_site_disorder_group
 Br1 Br 0.76661(11) 0.61089(7) 0.65836(2) 0.04786(17) Uani 1 1 d . . . . .
 F1 F 1.1219(7) 0.1639(3) 0.16738(13) 0.0506(9) Uani 1 1 d . . . . .
 F2 F 1.1946(6) 0.2609(3) 0.06598(17) 0.0469(9) Uani 1 1 d . . . . .
 F3 F 0.8360(5) 0.1238(4) 0.07154(14) 0.0423(7) Uani 1 1 d . . . . .
 F4 F 0.2664(7) 0.8423(4) 0.10230(15) 0.0492(9) Uani 1 1 d . . . . .
 O1 O 0.2983(5) 0.5669(4) 0.29367(14) 0.0298(9) Uani 1 1 d . . . . .
 N1 N 0.7582(7) 0.5430(4) 0.33343(17) 0.0184(7) Uani 1 1 d . . . . .
 H1 H 0.9225 0.5297 0.3193 0.022 Uiso 1 1 calc R . . . .
 C1 C 0.5605(9) 0.6556(5) 0.4364(2) 0.0241(12) Uani 1 1 d . . . . .
 H1A H 0.4280 0.7112 0.4046 0.029 Uiso 1 1 calc R . . . .
 C2 C 0.5684(10) 0.6699(5) 0.5115(2) 0.0298(12) Uani 1 1 d . . . . .
 H2 H 0.4411 0.7358 0.5311 0.036 Uiso 1 1 calc R . . . .
 C3 C 0.7583(9) 0.5894(7) 0.55628(19) 0.0256(11) Uani 1 1 d . . . . .
 C4 C 0.9478(10) 0.4941(6) 0.5298(2) 0.0274(11) Uani 1 1 d . . . . .
 H4 H 1.0805 0.4393 0.5620 0.033 Uiso 1 1 calc R . . . .
 C5 C 0.9420(9) 0.4794(5) 0.4557(2) 0.0234(10) Uani 1 1 d . . . . .
 H5 H 1.0716 0.4142 0.4366 0.028 Uiso 1 1 calc R . . . .
 C6 C 0.7487(9) 0.5592(4) 0.40935(19) 0.0165(9) Uani 1 1 d . . . . .
 C7 C 0.5388(9) 0.5463(5) 0.2815(2) 0.0204(10) Uani 1 1 d . . . . .
 C8 C 0.6100(8) 0.5223(5) 0.2062(2) 0.0185(10) Uani 1 1 d . . . . .
 C9 C 0.7646(9) 0.3944(5) 0.1919(2) 0.0217(10) Uani 1 1 d . . . . .
 H9 H 0.8217 0.3229 0.2295 0.026 Uiso 1 1 calc R . . . .
 C10 C 0.8361(9) 0.3704(5) 0.1231(2) 0.0216(10) Uani 1 1 d . . . . .
 C11 C 0.7579(10) 0.4754(5) 0.0684(2) 0.0268(11) Uani 1 1 d . . . . .
 H11 H 0.8072 0.4590 0.0212 0.032 Uiso 1 1 calc R . . . .
 C12 C 0.6082(9) 0.6041(7) 0.08271(17) 0.0292(9) Uani 1 1 d . . . . .
 H12 H 0.5578 0.6766 0.0452 0.035 Uiso 1 1 calc R . . . .
 C13 C 0.5294(10) 0.6297(7) 0.1511(2) 0.0241(10) Uani 1 1 d . . . . .
 C14 C 0.9961(11) 0.2311(5) 0.1069(2) 0.0279(10) Uani 1 1 d . . . . .
 C15 C 0.3912(11) 0.7790(6) 0.1675(3) 0.0336(13) Uani 1 1 d . . . . .
 H15 H 0.2472 0.7590 0.2002 0.040 Uiso 1 1 calc R . . . .
 C16 C 0.6018(12) 0.8924(5) 0.2029(3) 0.0431(15) Uani 1 1 d . . . . .
 H16A H 0.7477 0.9078 0.1718 0.065 Uiso 1 1 calc GR . . . .
 H16B H 0.6841 0.8522 0.2500 0.065 Uiso 1 1 calc GR . . . .
 H16C H 0.5104 0.9907 0.2098 0.065 Uiso 1 1 calc GR . . . .

loop_
  _atom_site_aniso_label
  _atom_site_aniso_U_11
  _atom_site_aniso_U_22
  _atom_site_aniso_U_33
  _atom_site_aniso_U_23
  _atom_site_aniso_U_13
  _atom_site_aniso_U_12
 Br1 0.0605(3) 0.0664(3) 0.01795(19) -0.0085(4) 0.0096(2) -0.0155(4)
 F1 0.066(2) 0.054(2) 0.0276(14) -0.0078(12) -0.0085(14) 0.0399(17)
 F2 0.0434(19) 0.0449(18) 0.058(2) -0.0102(16) 0.0275(17) 0.0067(15)
 F3 0.0490(15) 0.0281(14) 0.0472(15) -0.0126(19) -0.0036(13) 0.0009(17)
 F4 0.060(2) 0.055(2) 0.0307(17) 0.0110(15) -0.0008(15) 0.0339(18)
 O1 0.0155(15) 0.051(3) 0.0235(15) -0.0015(14) 0.0055(12) 0.0027(14)
 N1 0.0094(16) 0.0287(17) 0.0174(17) 0.0007(15) 0.0030(16) 0.0017(14)
 C1 0.020(2) 0.032(3) 0.020(2) -0.004(2) 0.0008(19) 0.0037(19)
 C2 0.030(3) 0.036(3) 0.025(2) -0.011(2) 0.010(2) -0.005(2)
 C3 0.030(3) 0.034(3) 0.0130(17) -0.002(2) 0.0059(18) -0.012(3)
 C4 0.033(3) 0.027(3) 0.019(2) 0.004(2) -0.003(2) -0.005(2)
 C5 0.021(2) 0.026(2) 0.023(2) 0.000(2) 0.003(2) 0.001(2)
 C6 0.0139(19) 0.018(2) 0.017(2) -0.0003(15) 0.0000(19) -0.0043(18)
 C7 0.018(2) 0.021(2) 0.023(2) 0.0011(18) 0.0054(19) -0.0025(19)
 C8 0.012(2) 0.025(2) 0.018(2) -0.0008(17) 0.0024(16) 0.0009(18)
 C9 0.019(2) 0.025(3) 0.020(2) 0.001(2) -0.0005(19) 0.001(2)
 C10 0.013(2) 0.028(3) 0.024(2) -0.006(2) 0.0028(19) 0.0025(19)
 C11 0.030(3) 0.033(3) 0.018(2) -0.001(2) 0.007(2) 0.002(2)
 C12 0.035(2) 0.035(2) 0.0179(18) 0.009(3) 0.0037(19) 0.006(3)
 C13 0.0186(19) 0.030(3) 0.0229(17) 0.006(2) 0.0014(18) 0.001(3)
 C14 0.027(2) 0.033(3) 0.022(2) -0.006(2) -0.003(2) 0.004(2)
 C15 0.039(3) 0.039(3) 0.023(3) 0.006(2) 0.007(3) 0.014(2)
 C16 0.060(4) 0.031(3) 0.039(3) 0.002(2) 0.009(3) 0.021(3)

_geom_special_details
;
 All esds (except the esd in the dihedral angle between two l.s. planes)
 are estimated using the full covariance matrix.  The cell esds are taken
 into account individually in the estimation of esds in distances, angles
 and torsion angles; correlations between esds in cell parameters are only
 used when they are defined by crystal symmetry.  An approximate (isotropic)
 treatment of cell esds is used for estimating esds involving l.s. planes.
;
loop_
  _geom_bond_atom_site_label_1
  _geom_bond_atom_site_label_2
  _geom_bond_distance
  _geom_bond_site_symmetry_2
  _geom_bond_publ_flag
 Br1 C3 1.904(4) . ?
 F1 C14 1.343(5) . ?
 F2 C14 1.330(6) . ?
 F3 C14 1.334(5) . ?
 F4 C15 1.397(5) . ?
 O1 C7 1.232(5) . ?
 N1 H1 0.8800 . ?
 N1 C6 1.426(5) . ?
 N1 C7 1.345(5) . ?
 C1 H1A 0.9500 . ?
 C1 C2 1.398(6) . ?
 C1 C6 1.383(5) . ?
 C2 H2 0.9500 . ?
 C2 C3 1.356(7) . ?
 C3 C4 1.376(7) . ?
 C4 H4 0.9500 . ?
 C4 C5 1.382(6) . ?
 C5 H5 0.9500 . ?
 C5 C6 1.378(6) . ?
 C7 C8 1.501(5) . ?
 C8 C9 1.387(6) . ?
 C8 C13 1.404(6) . ?
 C9 H9 0.9500 . ?
 C9 C10 1.384(6) . ?
 C10 C11 1.384(6) . ?
 C10 C14 1.491(6) . ?
 C11 H11 0.9500 . ?
 C11 C12 1.379(7) . ?
 C12 H12 0.9500 . ?
 C12 C13 1.393(5) . ?
 C13 C15 1.511(7) . ?
 C15 H15 1.0000 . ?
 C15 C16 1.510(7) . ?
 C16 H16A 0.9800 . ?
 C16 H16B 0.9800 . ?
 C16 H16C 0.9800 . ?

loop_
  _geom_angle_atom_site_label_1
  _geom_angle_atom_site_label_2
  _geom_angle_atom_site_label_3
  _geom_angle
  _geom_angle_site_symmetry_1
  _geom_angle_site_symmetry_3
  _geom_angle_publ_flag
 C6 N1 H1 117.0 . . ?
 C7 N1 H1 117.0 . . ?
 C7 N1 C6 125.9(3) . . ?
 C2 C1 H1A 120.6 . . ?
 C6 C1 H1A 120.6 . . ?
 C6 C1 C2 118.9(4) . . ?
 C1 C2 H2 120.1 . . ?
 C3 C2 C1 119.8(4) . . ?
 C3 C2 H2 120.1 . . ?
 C2 C3 Br1 119.2(4) . . ?
 C2 C3 C4 121.7(4) . . ?
 C4 C3 Br1 119.1(3) . . ?
 C3 C4 H4 120.5 . . ?
 C3 C4 C5 118.9(4) . . ?
 C5 C4 H4 120.5 . . ?
 C4 C5 H5 119.9 . . ?
 C6 C5 C4 120.2(4) . . ?
 C6 C5 H5 119.9 . . ?
 C1 C6 N1 121.8(3) . . ?
 C5 C6 N1 117.6(4) . . ?
 C5 C6 C1 120.5(4) . . ?
 O1 C7 N1 123.7(4) . . ?
 O1 C7 C8 122.0(4) . . ?
 N1 C7 C8 114.3(3) . . ?
 C9 C8 C7 119.0(4) . . ?
 C9 C8 C13 120.1(4) . . ?
 C13 C8 C7 120.8(4) . . ?
 C8 C9 H9 119.9 . . ?
 C10 C9 C8 120.2(4) . . ?
 C10 C9 H9 119.9 . . ?
 C9 C10 C14 120.5(4) . . ?
 C11 C10 C9 120.2(4) . . ?
 C11 C10 C14 119.3(4) . . ?
 C10 C11 H11 120.1 . . ?
 C12 C11 C10 119.7(4) . . ?
 C12 C11 H11 120.1 . . ?
 C11 C12 H12 119.4 . . ?
 C11 C12 C13 121.3(5) . . ?
 C13 C12 H12 119.4 . . ?
 C8 C13 C15 121.0(4) . . ?
 C12 C13 C8 118.4(5) . . ?
 C12 C13 C15 120.2(5) . . ?
 F1 C14 C10 112.2(4) . . ?
 F2 C14 F1 106.2(4) . . ?
 F2 C14 F3 105.9(3) . . ?
 F2 C14 C10 113.1(4) . . ?
 F3 C14 F1 106.5(4) . . ?
 F3 C14 C10 112.4(4) . . ?
 F4 C15 C13 108.6(4) . . ?
 F4 C15 H15 109.7 . . ?
 F4 C15 C16 108.4(4) . . ?
 C13 C15 H15 109.7 . . ?
 C16 C15 C13 110.8(4) . . ?
 C16 C15 H15 109.7 . . ?
 C15 C16 H16A 109.5 . . ?
 C15 C16 H16B 109.5 . . ?
 C15 C16 H16C 109.5 . . ?
 H16A C16 H16B 109.5 . . ?
 H16A C16 H16C 109.5 . . ?
 H16B C16 H16C 109.5 . . ?

loop_
  _geom_hbond_atom_site_label_D
  _geom_hbond_atom_site_label_H
  _geom_hbond_atom_site_label_A
  _geom_hbond_distance_DH
  _geom_hbond_distance_HA
  _geom_hbond_distance_DA
  _geom_hbond_angle_DHA
  _geom_hbond_site_symmetry_A
 N1 H1 O1 0.88 1.97 2.825(4) 162.7 1_655

_shelx_res_file
;
    yu85_b.res created by SHELXL-2014/7

TITL Yu85_b.res in P2(1)
REM Old TITL Yu85 in P2(1)
REM SHELXT solution in P2(1)
REM R1 0.273, Rweak 0.248, Alpha 0.146, Orientation as input
REM Flack x = 0.318 ( 0.007 ) from Parsons' quotients
REM Formula found by SHELXT: H5 Br F1 N3 O2
CELL 0.71073 4.8611 8.6969 18.6042 90 97.347 90
ZERR 2 0.0005 0.0009 0.002 0 0.003 0
LATT -1
SYMM -X,0.5+Y,-Z
SFAC C H Br F N O
UNIT 32 24 2 8 2 2
EQIV $1 1+X,+Y,+Z

L.S. 10
PLAN  4
TEMP -173.15
HTAB N1 O1_$1
BOND $H
LIST 4
ACTA
fmap 2
TWIN -1 0 0 0 -1 0 1 0 1 2
OMIT 0 0 1
REM <olex2.extras>
REM <HklSrc "%.\\Yu20170208_0m.hkl">
REM </olex2.extras>

WGHT    0.000000
BASF   0.30539
FVAR       0.82259
BR1   3    0.766611    0.610887    0.658361    11.00000    0.06046    0.06639 =
         0.01795   -0.00847    0.00965   -0.01549
F1    4    1.121873    0.163885    0.167378    11.00000    0.06643    0.05398 =
         0.02761   -0.00776   -0.00851    0.03993
F2    4    1.194645    0.260920    0.065978    11.00000    0.04335    0.04488 =
         0.05807   -0.01019    0.02752    0.00675
F3    4    0.836002    0.123820    0.071538    11.00000    0.04899    0.02806 =
         0.04719   -0.01264   -0.00362    0.00093
F4    4    0.266394    0.842301    0.102298    11.00000    0.06043    0.05470 =
         0.03072    0.01100   -0.00080    0.03388
O1    6    0.298303    0.566876    0.293673    11.00000    0.01549    0.05115 =
         0.02353   -0.00151    0.00554    0.00274
N1    5    0.758162    0.543031    0.333426    11.00000    0.00939    0.02865 =
         0.01740    0.00066    0.00301    0.00171
AFIX  43
H1    2    0.922470    0.529704    0.319280    11.00000   -1.20000
AFIX   0
C1    1    0.560501    0.655591    0.436443    11.00000    0.02015    0.03157 =
         0.02004   -0.00371    0.00077    0.00366
AFIX  43
H1A   2    0.428038    0.711197    0.404568    11.00000   -1.20000
AFIX   0
C2    1    0.568406    0.669861    0.511525    11.00000    0.03034    0.03592 =
         0.02494   -0.01145    0.01040   -0.00516
AFIX  43
H2    2    0.441101    0.735776    0.531139    11.00000   -1.20000
AFIX   0
C3    1    0.758272    0.589364    0.556281    11.00000    0.03016    0.03433 =
         0.01296   -0.00214    0.00587   -0.01155
C4    1    0.947801    0.494094    0.529806    11.00000    0.03345    0.02741 =
         0.01942    0.00385   -0.00349   -0.00463
AFIX  43
H4    2    1.080467    0.439293    0.561975    11.00000   -1.20000
AFIX   0
C5    1    0.941985    0.479446    0.455671    11.00000    0.02126    0.02556 =
         0.02326    0.00013    0.00268    0.00127
AFIX  43
H5    2    1.071612    0.414209    0.436571    11.00000   -1.20000
AFIX   0
C6    1    0.748680    0.559202    0.409355    11.00000    0.01386    0.01782 =
         0.01725   -0.00028    0.00005   -0.00431
C7    1    0.538762    0.546305    0.281493    11.00000    0.01781    0.02145 =
         0.02257    0.00114    0.00536   -0.00245
C8    1    0.610029    0.522318    0.206150    11.00000    0.01196    0.02540 =
         0.01823   -0.00080    0.00235    0.00086
C9    1    0.764644    0.394362    0.191933    11.00000    0.01916    0.02479 =
         0.02035    0.00148   -0.00047    0.00055
AFIX  43
H9    2    0.821679    0.322927    0.229530    11.00000   -1.20000
AFIX   0
C10   1    0.836091    0.370443    0.123124    11.00000    0.01309    0.02803 =
         0.02377   -0.00576    0.00282    0.00251
C11   1    0.757920    0.475438    0.068438    11.00000    0.03045    0.03267 =
         0.01841   -0.00129    0.00720    0.00187
AFIX  43
H11   2    0.807209    0.458965    0.021248    11.00000   -1.20000
AFIX   0
C12   1    0.608209    0.604063    0.082706    11.00000    0.03480    0.03483 =
         0.01795    0.00883    0.00367    0.00646
AFIX  43
H12   2    0.557776    0.676620    0.045157    11.00000   -1.20000
AFIX   0
C13   1    0.529444    0.629701    0.151126    11.00000    0.01864    0.03027 =
         0.02294    0.00648    0.00137    0.00127
C14   1    0.996081    0.231084    0.106942    11.00000    0.02723    0.03326 =
         0.02180   -0.00558   -0.00276    0.00415
C15   1    0.391189    0.779040    0.167470    11.00000    0.03945    0.03896 =
         0.02298    0.00626    0.00659    0.01417
AFIX  13
H15   2    0.247170    0.759003    0.200189    11.00000   -1.20000
AFIX   0
C16   1    0.601822    0.892371    0.202862    11.00000    0.05968    0.03127 =
         0.03894    0.00165    0.00869    0.02130
AFIX 137
H16A  2    0.747699    0.907787    0.171767    11.00000   -1.50000
H16B  2    0.684079    0.852166    0.249963    11.00000   -1.50000
H16C  2    0.510365    0.990698    0.209820    11.00000   -1.50000
AFIX   0
HKLF 4

REM  Yu85_b.res in P2(1)
REM R1 =  0.0285 for    2888 Fo > 4sig(Fo)  and  0.0352 for all    3169 data
REM    210 parameters refined using      1 restraints

END

WGHT      0.0000      0.0000

REM Highest difference peak  0.220,  deepest hole -0.241,  1-sigma level  0.045
Q1    1   0.8243  0.6117  0.6490  11.00000  0.05    0.22
Q2    1   0.8227  0.6519  0.7001  11.00000  0.05    0.21
Q3    1   0.9912  0.6208  0.6947  11.00000  0.05    0.21
Q4    1   0.6242  0.5486  0.6215  11.00000  0.05    0.21
;
_shelx_res_checksum               75806
_shelx_hkl_file
;
  -1   0   0 334.718 22.3167   1
  -1   0   0 341.601 23.3949   2
  -1   0   0 332.794 22.7419   4
   1   0   0 347.497 22.2631   1
   1   0   0 320.794 23.3209   2
   2   0   0 2443.02 152.850   1
  -2   0   0 2324.25 154.946   2
  -2   0   0 2371.31 153.900   4
  -2   0   0 2296.46 153.038   1
  -3   0   0 286.136 23.6310   2
  -3   0   0 315.878 22.2546   4
  -3   0   0 288.753 25.1001   5
  -3   0   0 290.173 20.3273   1
  -3   0   0 278.798 20.2095   1
  -4   0   0 423.314 32.1580   4
  -4   0   0 450.576 34.5928   2
  -4   0   0 436.390 29.4568   1
  -4   0   0 432.703 36.9617   5
  -4   0   0 429.574 29.5305   1
  -5   0   0 89.2485 16.2661   2
  -5   0   0 109.973 19.7707   5
  -5   0   0 118.712 13.8530   4
  -6   0   0 77.2036 18.7100   5
   0  -1   0 -0.5618 1.22320   4
   0  -1   0 0.64829 0.93386   5
   0  -1   0 0.90206 1.50048   3
   0  -1   0 0.39108 1.80175   1
   0  -1   0 0.19407 1.45477   1
   0   1   0 0.18792 1.35420   1
   0   1   0 1.42104 1.44576   4
   0   1   0 -1.2342 1.58878   1
   0   1   0 -0.3007 1.29805   3
   0   1   0 0.51456 0.86922   5
  -1  -1   0 8304.17 548.998   4
  -1  -1   0 8642.83 550.644   3
   1  -1   0 8691.98 548.912   1
   1  -1   0 7857.93 549.336   5
  -1  -1   0 9274.49 549.659   1
   1  -1   0 8975.82 550.930   2
  -1   1   0 8081.83 548.825   1
  -1   1   0 8154.01 548.762   1
   1   1   0 8892.43 549.777   1
  -1   1   0 8011.69 549.416   5
  -1   1   0 9043.92 549.484   2
   1   1   0 8104.79 548.875   1
   2  -1   0 409.897 28.2183   2
  -2  -1   0 412.862 25.9228   1
  -2  -1   0 391.457 29.2494   2
  -2  -1   0 382.770 28.0392   4
  -2   1   0 376.300 26.5804   4
  -2   1   0 364.579 29.6437   5
  -2   1   0 396.539 27.4653   1
  -2   1   0 400.112 27.5288   1
  -2   1   0 374.960 27.9647   2
  -3  -1   0 430.390 33.1781   2
   3  -1   0 440.210 32.2866   2
  -3  -1   0 446.025 31.7423   4
   3  -1   0 450.943 29.7680   1
  -3   1   0 391.668 33.8378   5
  -3   1   0 422.409 29.8978   4
  -3   1   0 414.120 30.0621   1
  -3   1   0 396.305 31.5599   2
  -3   1   0 441.883 30.4111   1
  -4  -1   0 181.822 19.5673   2
  -4  -1   0 174.244 17.3670   4
  -4  -1   0 158.716 20.4204   5
  -4   1   0 174.271 14.9958   1
  -4   1   0 185.527 15.6172   4
  -4   1   0 192.485 15.1841   1
  -4   1   0 180.016 18.1843   2
  -4   1   0 189.275 21.6186   5
  -5  -1   0 299.555 27.2716   3
  -5  -1   0 331.654 29.4099   2
  -5  -1   0 309.605 26.0648   4
  -5  -1   0 316.026 31.1142   5
  -5   1   0 292.881 22.0351   1
  -5   1   0 267.494 31.6628   5
  -5   1   0 293.851 27.7590   2
  -6  -1   0 8.74397 13.3054   5
  -6  -1   0 25.2992 12.5610   2
  -6   1   0 41.1578 26.5342   5
   0  -2   0 8566.88 566.714   1
   0  -2   0 9011.76 569.871   5
   0  -2   0 8282.87 566.769   1
   0  -2   0 8778.36 567.770   4
   0  -2   0 8702.90 566.357   3
   0   2   0 9999.99 569.327   5
   0   2   0 8782.56 567.778   3
   0   2   0 8573.01 566.905   1
   0   2   0 8421.74 566.203   4
   0   2   0 8651.28 566.777   1
   1  -2   0 1930.06 121.329   1
  -1  -2   0 1963.02 120.359   1
   1  -2   0 2027.91 119.189   4
   1  -2   0 1789.55 121.136   5
  -1  -2   0 2109.69 120.089   3
   1  -2   0 1911.36 121.093   1
   1  -2   0 1970.99 120.231   2
   1   2   0 1796.86 121.053   4
  -1   2   0 1784.45 121.209   3
   1   2   0 1752.01 120.287   1
  -1   2   0 1857.86 121.291   1
  -1   2   0 1769.48 119.990   2
  -1   2   0 1721.31 119.187   4
   1   2   0 1709.08 120.165   1
   1   2   0 1813.08 120.001   3
  -1   2   0 1725.86 121.172   1
  -1   2   0 1710.11 120.967   5
  -2  -2   0 496.376 34.4093   4
   2  -2   0 526.075 33.6643   2
  -2  -2   0 503.774 32.9226   3
   2  -2   0 448.231 35.0109   5
  -2  -2   0 512.972 32.0071   1
   2  -2   0 487.870 33.7509   1
  -2   2   0 446.288 35.1628   5
   2   2   0 473.181 31.7577   1
  -2   2   0 432.428 32.8149   2
  -2   2   0 442.996 33.7584   1
   2   2   0 452.785 31.6929   1
  -2   2   0 487.858 33.9792   1
  -3  -2   0 146.909 13.7196   3
  -3  -2   0 133.136 15.8376   2
  -3  -2   0 147.762 10.4535   1
   3  -2   0 155.777 14.7752   2
   3  -2   0 105.307 12.2705   1
  -3  -2   0 153.012 15.1879   4
  -3   2   0 168.506 17.7920   5
  -3   2   0 168.105 14.2135   2
  -3   2   0 169.308 11.4072   4
  -3   2   0 152.929 14.0824   1
  -3   2   0 162.076 14.0958   1
  -4  -2   0 213.691 18.9835   4
  -4  -2   0 195.362 17.4175   3
  -4  -2   0 212.867 21.3644   2
  -4   2   0 169.094 13.7389   4
  -4   2   0 162.158 16.1106   1
  -4   2   0 171.114 16.1610   1
  -4   2   0 156.359 21.3123   5
  -4   2   0 155.611 17.3958   2
  -5  -2   0 18.1176 10.8415   2
  -5  -2   0 14.6385 8.83950   4
  -5  -2   0 26.9318 11.8988   5
  -5  -2   0 13.5041 8.76569   3
  -5   2   0 24.3689 6.83530   1
  -5   2   0 28.8579 14.0012   5
  -5   2   0 8.05893 8.35130   2
   0  -3   0 -2.0984 4.02413   1
   0  -3   0 -0.5792 2.26321   5
   0  -3   0 1.89670 3.60457   4
   0  -3   0 -0.3035 3.76722   3
   0  -3   0 -2.0652 4.11980   1
   0   3   0 -1.9919 3.23829   4
   0   3   0 -1.9850 3.59607   1
   0   3   0 4.44564 2.87178   5
   0   3   0 1.81226 3.91637   1
   0   3   0 0.41878 3.09316   3
   1  -3   0 1624.57 125.764   5
  -1  -3   0 1851.62 126.316   4
   1  -3   0 1877.74 126.441   1
  -1  -3   0 1857.88 125.607   1
   1  -3   0 1867.64 124.317   4
   1  -3   0 1882.86 125.090   2
   1  -3   0 1857.71 126.672   1
  -1  -3   0 1853.76 125.825   1
  -1  -3   0 1991.91 124.997   3
  -1  -3   0 1905.04 124.833   5
  -1   3   0 2010.96 127.065   1
  -1   3   0 1960.54 125.905   5
  -1   3   0 1971.92 126.438   3
  -1   3   0 2054.67 126.970   1
   1   3   0 1985.76 125.827   1
   1   3   0 1955.94 124.914   3
   1   3   0 2072.81 126.137   1
  -2  -3   0 611.323 39.9547   1
  -2  -3   0 654.741 40.0736   3
   2  -3   0 632.078 40.7338   2
   2  -3   0 651.078 42.2050   1
   2  -3   0 556.530 42.2305   5
   2   3   0 560.970 39.8507   1
  -2   3   0 565.353 40.0428   2
  -2   3   0 553.058 41.7966   1
  -2   3   0 566.758 42.4229   5
  -2   3   0 578.695 42.0916   1
  -2   3   0 562.610 43.6224   3
   2   3   0 544.542 39.6625   1
  -3  -3   0 179.620 14.3818   1
  -3  -3   0 183.728 18.3383   4
  -3  -3   0 188.952 20.0510   2
   3  -3   0 191.981 17.3209   2
   3  -3   0 174.734 17.2772   1
  -3  -3   0 184.572 16.4306   3
  -3   3   0 202.206 20.7764   5
   3   3   0 213.465 13.6178   1
  -3   3   0 201.072 18.3135   1
  -3   3   0 216.695 18.4421   1
  -3   3   0 216.252 17.0200   2
  -4  -3   0 146.674 19.7251   2
  -4  -3   0 136.039 14.5929   3
  -4  -3   0 117.656 16.3414   4
  -4   3   0 130.313 14.6811   2
  -4   3   0 139.994 21.5902   5
  -4   3   0 142.736 15.4808   1
  -5  -3   0 96.1968 17.5757   2
  -5  -3   0 92.7880 13.3922   3
  -5  -3   0 88.2006 16.6951   5
  -5  -3   0 112.837 16.5065   4
  -5   3   0 83.2472 13.3901   1
  -5   3   0 66.8820 17.4784   5
   0  -4   0 2302.17 157.027   1
   0  -4   0 2401.82 155.095   5
   0  -4   0 2338.55 156.768   1
   0  -4   0 2289.80 155.825   4
   0  -4   0 2367.74 156.112   3
   0   4   0 2549.47 154.892   5
   0   4   0 2408.51 157.257   1
   0   4   0 2314.39 155.661   3
   0   4   0 2402.68 155.953   4
   0   4   0 2393.53 157.188   1
  -1  -4   0 290.893 20.6310   3
   1  -4   0 271.674 22.5316   1
  -1  -4   0 279.278 22.1071   1
   1  -4   0 292.536 20.1016   4
  -1  -4   0 264.544 22.3605   4
   1  -4   0 291.219 23.3770   1
  -1  -4   0 315.237 20.1377   5
  -1  -4   0 263.376 21.5180   1
   1  -4   0 244.522 21.4402   5
   1  -4   0 296.433 20.9059   2
  -1   4   0 270.180 23.2625   1
  -1   4   0 276.869 21.9548   3
  -1   4   0 255.920 21.2542   5
   1   4   0 274.762 20.3007   3
   1   4   0 287.597 22.0396   1
   1   4   0 290.170 22.1172   1
  -1   4   0 266.579 23.1851   1
   2  -4   0 1090.82 74.0399   1
  -2  -4   0 1071.92 71.1350   3
  -2  -4   0 1105.41 71.9300   1
   2  -4   0 1127.30 71.9173   2
  -2  -4   0 1029.50 71.4863   5
  -2  -4   0 1135.98 74.1300   4
  -2   4   0 1074.14 74.1433   1
   2   4   0 1001.16 71.3468   3
  -2   4   0 1030.40 73.6174   5
  -2   4   0 1062.33 71.4666   2
  -2   4   0 1057.79 74.0091   1
   3  -4   0 120.872 13.3916   2
   3  -4   0 122.809 14.6802   1
  -3  -4   0 109.649 10.9267   1
  -3  -4   0 130.158 12.0905   3
  -3  -4   0 97.1342 17.0919   2
  -3  -4   0 113.921 16.1321   4
  -3   4   0 145.075 13.1985   2
  -3   4   0 130.212 18.3325   5
   3   4   0 136.825 10.9463   1
  -3   4   0 129.121 15.3629   1
  -3   4   0 144.884 15.9238   1
  -4  -4   0 113.942 12.4637   3
  -4  -4   0 120.732 16.7066   4
  -4  -4   0 120.737 18.9394   2
  -4   4   0 107.111 15.2367   1
  -4   4   0 68.5630 16.0799   5
  -4   4   0 84.2887 13.1078   2
  -5  -4   0 17.0583 10.9057   4
  -5  -4   0 8.77719 12.4895   2
  -5   4   0 5.09864 8.06215   1
  -5   4   0 8.31794 14.1091   5
   0  -5   0 3.06927 5.11439   3
   0  -5   0 6.46711 4.98467   4
   0  -5   0 1.51452 3.37614   5
   0  -5   0 -0.2769 4.91030   1
   0  -5   0 -2.4794 5.48829   1
   0   5   0 5.87541 5.59034   1
   0   5   0 2.71160 4.57965   5
   0   5   0 -1.5957 3.63451   3
  -1  -5   0 298.246 23.1974   4
  -1  -5   0 295.835 22.5614   1
  -1  -5   0 313.396 23.5311   1
   1  -5   0 251.888 21.6560   5
   1  -5   0 280.006 21.1297   2
   1  -5   0 316.482 24.5132   1
   1  -5   0 294.925 20.4603   4
  -1  -5   0 276.071 21.0209   3
  -1   5   0 257.897 21.2050   5
  -1   5   0 264.655 24.2272   1
   1   5   0 243.963 22.3688   1
   1   5   0 239.765 20.1729   3
  -1   5   0 248.593 23.5216   1
  -2  -5   0 436.346 32.7524   4
  -2  -5   0 402.158 30.4282   1
  -2  -5   0 445.010 29.5839   5
   2  -5   0 392.540 29.9363   2
   2  -5   0 420.030 33.0518   1
   2  -5   0 411.114 27.3369   4
  -2  -5   0 461.207 29.6637   3
   2   5   0 389.126 29.3671   3
  -2   5   0 397.258 33.1184   1
   2   5   0 397.387 30.4228   1
  -2   5   0 391.528 33.2591   1
  -2   5   0 367.096 31.6670   5
   3  -5   0 384.570 28.2257   2
   3  -5   0 406.564 30.9066   1
  -3  -5   0 413.846 31.9682   4
  -3  -5   0 380.924 27.1288   1
  -3  -5   0 405.345 27.0333   3
  -3   5   0 323.768 30.7069   1
  -3   5   0 352.042 27.6264   2
  -3   5   0 327.329 30.3079   1
   3   5   0 316.968 26.5315   1
  -3   5   0 328.955 31.9002   5
  -4  -5   0 86.6282 17.8280   2
  -4  -5   0 62.5745 10.1868   3
  -4  -5   0 65.9811 14.1710   4
  -4   5   0 59.0932 10.7178   2
  -4   5   0 81.3514 18.2767   5
  -4   5   0 64.6358 13.1936   1
  -5  -5   0 17.9993 13.7378   2
  -5  -5   0 21.0271 11.4837   4
  -5   5   0 17.9799 16.4359   5
  -5   5   0 29.5611 11.0415   1
   0  -6   0 311.050 25.1065   1
   0  -6   0 282.927 22.5273   4
   0  -6   0 264.414 22.8362   3
   0  -6   0 258.932 20.9384   5
   0  -6   0 250.864 23.3441   1
   0   6   0 274.142 21.0496   5
   0   6   0 289.014 24.9119   1
   1  -6   0 87.1467 10.8872   4
   1  -6   0 99.4792 14.7965   1
  -1  -6   0 89.0477 14.0027   1
  -1  -6   0 107.793 12.0593   3
  -1  -6   0 88.8075 12.4961   1
   1  -6   0 82.1771 11.4756   2
  -1  -6   0 111.005 10.0567   5
  -1  -6   0 109.508 13.7404   4
  -1   6   0 118.659 16.1832   1
   1   6   0 87.5329 11.3020   5
  -1   6   0 120.913 12.5769   5
   1   6   0 115.471 10.6524   3
   1   6   0 111.281 14.0305   1
   2  -6   0 211.720 18.5196   2
   2  -6   0 242.012 15.9879   4
   2  -6   0 205.718 22.1154   1
  -2  -6   0 237.370 19.4301   1
  -2  -6   0 247.958 18.4272   3
  -2  -6   0 260.283 22.5758   4
  -2   6   0 210.954 23.1903   1
   2   6   0 178.016 19.0247   1
  -2   6   0 203.826 20.5774   5
   2   6   0 174.297 17.3321   3
  -3  -6   0 56.2507 9.16739   3
   3  -6   0 71.2794 13.2093   1
  -3  -6   0 62.6143 13.4895   4
  -3   6   0 57.1066 14.4611   5
  -3   6   0 70.7365 13.8118   1
  -4  -6   0 37.6396 14.1393   2
  -4  -6   0 55.4533 13.9695   4
  -4   6   0 25.4086 11.0789   1
  -4   6   0 11.3155 14.5728   5
  -5  -6   0 33.7035 23.1808   2
  -5  -6   0 31.8029 13.4379   4
  -5   6   0 32.2901 17.9535   1
   0  -7   0 8.78518 6.81392   4
   0  -7   0 12.2667 7.55343   3
   0  -7   0 12.2129 8.80926   1
   0   7   0 11.2367 8.43598   1
   0   7   0 5.99812 6.59322   5
  -1  -7   0 106.940 14.9544   1
   1  -7   0 99.3053 17.0392   1
  -1  -7   0 126.647 15.8405   4
   1  -7   0 107.001 13.0357   4
  -1  -7   0 113.809 13.7457   3
  -1   7   0 132.536 19.1239   1
   1   7   0 136.424 13.9028   5
   1   7   0 126.983 16.0322   1
  -1   7   0 141.832 14.3427   5
  -2  -7   0 25.8469 7.13124   3
  -2  -7   0 29.9705 10.6472   4
   2  -7   0 19.1527 5.17041   4
   2  -7   0 37.4336 10.8448   1
   2   7   0 29.8127 8.59120   1
  -2   7   0 23.1766 11.5928   1
  -2   7   0 24.0711 9.93480   5
   3  -7   0 108.776 18.3088   1
  -3  -7   0 114.543 12.8226   3
  -3  -7   0 113.470 17.5837   4
  -3   7   0 92.2456 17.9751   1
  -4  -7   0 38.6313 13.8737   4
  -4  -7   0 34.8066 14.4210   2
  -4   7   0 12.3156 11.7118   1
  -4   7   0 4.71849 14.0978   5
   0  -8   0 289.887 28.6716   1
   0  -8   0 250.316 24.4041   4
   0   8   0 327.352 29.8219   1
   0   8   0 280.264 23.4285   5
  -1  -8   0 77.3603 12.4507   3
   1  -8   0 78.1611 11.7143   4
   1  -8   0 78.2863 15.3877   1
  -1  -8   0 64.3945 13.0091   4
   1   8   0 84.4504 12.3617   5
   1   8   0 77.9107 13.8847   1
  -1   8   0 87.1115 14.3220   5
  -1   8   0 84.1615 17.0310   1
   2  -8   0 51.4341 14.7710   1
  -2  -8   0 52.9971 13.3709   4
  -2  -8   0 54.6143 10.2743   3
  -2   8   0 48.4527 14.4919   1
  -2   8   0 29.5993 11.1138   5
  -3  -8   0 31.6604 12.5844   4
  -3   8   0 11.4090 11.6845   1
  -3   8   0 13.2637 12.7668   5
  -4   8   0 18.8326 15.6336   5
   0  -9   0 -4.4993 7.42412   4
   0   9   0 -2.2355 9.81394   1
   0   9   0 7.99854 8.76832   5
   1  -9   0 26.7124 8.73215   4
  -1  -9   0 25.5720 10.2436   4
  -1  -9   0 22.6673 10.0457   3
   1  -9   0 30.3935 13.0512   1
  -1   9   0 25.4791 13.0898   1
  -1   9   0 5.14288 10.2776   5
  -2  -9   0 57.7257 14.2300   4
  -2   9   0 22.6024 12.2724   5
  -2   9   0 57.7634 16.5140   1
  -3  -9   0 18.3021 13.0283   4
  -3   9   0 7.59634 13.8918   1
  -3   9   0 -11.774 10.9197   5
   0 -10   0 -2.0310 8.65141   4
   0  10   0 12.9772 12.2817   1
   0  10   0 10.9659 9.40693   5
  -1 -10   0 22.4865 10.5637   4
  -1  10   0 13.5487 13.8545   1
  -1  10   0 -4.2816 10.2940   5
  -2 -10   0 -9.5699 9.65100   4
  -2  10   0 1.63243 14.0132   1
  -2  10   0 -25.731 11.5349   5
  -6   0   1 46.6109 14.4129   2
  -6   0   1 82.3338 18.5582   5
  -5   0   1 12.6581 9.80851   2
  -5   0   1 11.3132 6.66329   4
  -5   0   1 10.9544 12.7475   5
  -4   0   1 120.885 18.9352   5
  -4   0   1 115.526 10.5045   1
  -4   0   1 125.012 10.5733   1
  -4   0   1 130.110 15.8051   2
  -4   0   1 128.021 13.2161   4
  -3   0   1 762.318 52.2674   1
   3   0  -1 828.687 51.9350   1
  -3   0   1 737.161 56.1512   5
  -3   0   1 803.122 53.2965   4
  -3   0   1 761.059 55.0926   2
  -2   0   1 174.108 15.3449   2
  -2   0   1 186.534 13.4212   1
  -2   0   1 173.596 13.8122   4
   2   0  -1 181.487 13.1112   1
   2   0  -1 171.298 15.4779   2
   1   0  -1 725.134 47.1004   4
  -1   0   1 710.653 47.8946   2
  -1   0   1 704.449 47.0574   4
   1   0  -1 717.283 47.8936   2
  -1   0   1 720.100 47.0814   1
   0   0   1 -0.6971 0.40874   3
   0   0  -1 0.00481 0.36205   2
  -1   0  -1 444.814 31.2748   5
  -1   0  -1 447.399 29.7369   1
  -1   0  -1 459.160 30.8275   2
  -1   0  -1 463.852 29.7605   1
  -2   0  -1 1270.82 88.0099   5
  -2   0  -1 1327.77 85.0490   1
  -2   0  -1 1324.26 84.9825   1
  -2   0  -1 1307.34 87.0653   2
  -2   0  -1 1292.43 86.2097   4
  -3   0  -1 231.145 18.1085   4
  -3   0  -1 217.892 15.7141   1
  -3   0  -1 232.948 21.5696   5
  -3   0  -1 238.580 19.7420   2
  -3   0  -1 220.002 15.7958   1
  -4   0  -1 244.369 25.5503   5
  -4   0  -1 286.185 24.5421   2
  -4   0  -1 270.789 22.2354   4
  -5   0  -1 10.2523 11.0920   5
  -5   0  -1 9.12751 9.19324   2
  -5   0  -1 -0.4694 6.30608   4
  -6  -1   1 16.1085 12.7870   2
  -6  -1   1 28.8856 15.0394   5
  -6   1   1 23.9520 24.7896   5
  -5  -1   1 216.289 24.0377   2
  -5  -1   1 205.310 25.8570   5
  -5  -1   1 222.506 20.8188   4
  -5   1   1 226.275 26.6857   5
  -5   1   1 226.129 17.6343   1
  -5   1   1 199.179 23.1072   2
  -4  -1   1 26.4983 10.4587   5
  -4  -1   1 40.8160 8.64528   4
  -4  -1   1 42.5804 10.9361   2
   4  -1  -1 29.5292 5.46728   1
  -4   1   1 43.8223 6.89138   1
  -4   1   1 49.7077 7.78599   1
  -4   1   1 37.1498 9.25866   2
  -4   1   1 44.7580 6.95770   4
  -4   1   1 23.0763 11.2365   5
  -3  -1   1 464.057 33.5008   1
  -3  -1   1 477.093 35.9349   4
  -3  -1   1 467.715 37.3942   2
   3  -1  -1 472.577 34.6224   1
   3  -1  -1 523.268 37.1601   2
  -3   1   1 528.460 34.4539   4
  -3   1   1 530.760 39.5708   5
  -3   1   1 485.760 36.5019   2
  -3   1   1 529.848 35.3560   1
  -3   1   1 536.879 35.0976   1
  -2  -1   1 565.231 42.0926   2
  -2  -1   1 566.907 41.0698   4
   2  -1  -1 555.406 41.3735   2
  -2  -1   1 564.364 39.5613   1
  -2   1   1 632.185 40.8103   1
  -2   1   1 597.305 40.7751   1
   2   1  -1 615.008 39.4178   1
  -2   1   1 609.724 43.0445   5
  -2   1   1 623.910 41.3907   2
  -2   1   1 625.141 39.6531   4
   1  -1  -1 7848.90 533.493   4
  -1  -1   1 7995.09 535.266   2
   1  -1  -1 8171.02 534.655   2
  -1  -1   1 9118.97 535.824   1
  -1  -1   1 7907.32 534.693   4
   1  -1  -1 7958.99 534.728   1
  -1  -1   1 8278.09 536.309   3
  -1   1   1 8472.30 534.978   3
  -1   1   1 9013.34 534.122   4
  -1   1   1 8195.99 534.753   1
  -1   1   1 8680.13 538.484   2
   1   1  -1 8228.55 534.723   4
  -1   1   1 7792.46 535.233   5
   0  -1  -1 393.396 31.0883   1
   0  -1   1 464.569 30.6400   5
   0  -1  -1 425.491 30.8730   3
   0  -1   1 419.779 31.1407   1
   0  -1  -1 408.832 30.4148   5
   0  -1   1 404.831 30.7781   4
   0   1   1 502.266 31.3161   1
   0   1   1 532.701 31.2995   1
   0   1   1 533.530 30.4360   5
   0   1  -1 509.616 31.2898   1
   0   1   1 514.959 31.0119   3
   0   1  -1 506.917 30.9229   4
  -1  -1  -1 460.095 27.2469   1
   1  -1   1 458.477 27.7427   2
   1  -1   1 436.369 28.1112   1
   1  -1   1 442.490 28.2544   1
   1  -1   1 409.088 28.8918   5
  -1  -1  -1 454.825 28.2160   3
  -1   1  -1 379.692 28.8056   5
  -1   1  -1 374.030 28.0597   1
   1   1   1 372.244 27.0079   1
  -1   1  -1 381.551 28.0681   1
   1   1   1 386.103 27.0729   1
  -1   1  -1 408.057 27.5819   2
  -2  -1  -1 798.927 55.9451   4
   2  -1   1 855.978 55.8449   2
  -2  -1  -1 824.984 56.9299   2
   2  -1   1 848.200 55.0945   1
  -2   1  -1 783.040 57.3436   5
  -2   1  -1 849.547 55.7123   2
  -2   1  -1 829.591 55.3010   1
  -2   1  -1 817.440 55.1690   1
  -3  -1  -1 413.713 31.1901   4
  -3  -1  -1 369.097 32.6765   5
  -3  -1  -1 412.225 32.6747   2
  -3   1  -1 432.125 29.7485   4
  -3   1  -1 437.534 31.3095   2
  -3   1  -1 421.161 29.6658   1
  -3   1  -1 439.268 34.0026   5
  -3   1  -1 432.701 29.5977   1
  -4  -1  -1 138.261 16.0716   4
  -4  -1  -1 130.619 17.7513   2
  -4  -1  -1 134.491 18.1165   5
  -4   1  -1 172.990 13.5987   1
  -4   1  -1 180.504 17.2385   2
  -4   1  -1 167.216 14.6663   4
  -4   1  -1 171.404 13.5236   1
  -4   1  -1 133.040 19.4660   5
  -5  -1  -1 73.6144 14.7385   2
  -5  -1  -1 55.8658 15.5056   5
  -5  -1  -1 55.9659 12.7107   3
  -5  -1  -1 84.3518 12.6018   4
  -5   1  -1 61.6587 7.39218   1
  -5   1  -1 59.7189 12.5864   2
  -5   1  -1 62.9538 15.9006   5
  -5  -2   1 24.9069 9.50130   4
  -5  -2   1 31.1042 9.23385   3
  -5  -2   1 25.6539 11.6091   5
  -5  -2   1 29.7214 12.0927   2
  -5   2   1 31.5999 15.3491   5
  -5   2   1 25.1014 9.73107   2
  -5   2   1 28.3204 7.14579   1
  -4  -2   1 224.095 21.2666   4
  -4  -2   1 265.423 24.7489   2
  -4  -2   1 231.192 20.3573   3
   4  -2  -1 241.804 20.2894   1
  -4   2   1 237.005 21.1936   2
  -4   2   1 231.408 20.1581   1
  -4   2   1 235.859 17.2866   4
  -4   2   1 235.208 19.9953   1
  -4   2   1 230.428 26.3768   5
  -3  -2   1 345.681 26.0970   3
  -3  -2   1 343.865 27.5703   4
  -3  -2   1 368.076 29.7606   2
   3  -2  -1 356.030 26.5799   1
   3  -2  -1 377.074 28.0129   2
  -3  -2   1 360.350 24.3344   1
  -3   2   1 370.746 27.0046   1
  -3   2   1 353.146 27.1246   2
  -3   2   1 352.568 30.1016   5
  -3   2   1 346.573 23.9752   4
  -3   2   1 347.073 26.8999   1
  -2  -2   1 2553.32 165.778   2
   2  -2  -1 2499.03 164.338   1
  -2  -2   1 2500.55 162.798   1
  -2  -2   1 2499.16 164.652   4
   2  -2  -1 2539.73 164.140   2
  -2  -2   1 2530.94 162.996   3
  -2   2   1 2447.79 164.327   1
  -2   2   1 2471.76 164.215   1
  -2   2   1 2499.70 165.791   5
  -2   2   1 2599.79 165.109   3
  -2   2   1 2481.13 163.716   2
   2   2  -1 2528.45 164.555   4
   2   2  -1 2446.86 162.603   1
   2   2  -1 2477.58 162.689   1
   1  -2  -1 3956.40 267.353   2
   1  -2  -1 3874.34 268.136   1
   1  -2  -1 3812.00 266.087   4
  -1  -2   1 3995.95 267.973   4
   1  -2  -1 3469.96 267.770   5
  -1  -2   1 4105.20 267.442   1
  -1  -2   1 3939.87 266.530   3
  -1  -2   1 3486.47 267.052   5
  -1   2   1 4660.48 267.478   2
   1   2  -1 4380.26 267.509   1
   1   2  -1 4356.52 267.499   1
  -1   2   1 4436.30 268.504   1
   1   2  -1 4422.19 268.177   4
  -1   2   1 4254.44 268.166   5
  -1   2   1 4371.52 268.314   1
   1   2  -1 4393.95 266.692   3
  -1   2   1 4288.94 268.162   3
   0  -2  -1 4125.50 272.396   1
   0  -2  -1 4415.02 272.752   5
   0  -2  -1 4148.16 271.873   3
   0  -2   1 4087.47 272.218   1
   0  -2   1 4076.52 271.719   4
   0  -2   1 4150.21 271.749   3
   0  -2  -1 4087.82 272.184   1
   0  -2   1 4691.39 271.449   5
   0  -2  -1 4122.86 271.776   4
   0  -2   1 4055.35 272.358   1
   0   2  -1 4132.95 271.689   3
   0   2   1 4082.44 272.366   1
   0   2  -1 4617.98 271.384   5
   0   2  -1 4084.47 272.347   1
   0   2   1 4010.08 272.199   1
   0   2   1 4555.81 272.137   5
   0   2  -1 4097.53 272.314   1
   0   2  -1 4062.77 271.728   4
   0   2   1 4132.64 271.773   3
  -1  -2  -1 1628.96 101.379   3
   1  -2   1 1474.54 102.105   1
  -1  -2  -1 1557.31 102.273   4
   1  -2   1 1558.67 100.483   4
   1  -2   1 1613.88 100.920   2
  -1  -2  -1 1558.97 101.245   1
   1  -2   1 1398.63 102.049   5
   1  -2   1 1528.85 101.980   1
  -1  -2  -1 1567.37 101.354   1
  -1   2  -1 1494.95 102.115   5
   1   2   1 1538.33 101.389   3
  -1   2  -1 1545.38 102.323   1
  -1   2  -1 1558.40 100.519   4
  -1   2  -1 1630.86 100.820   2
   1   2   1 1568.99 101.382   1
  -1   2  -1 1556.76 102.271   1
  -2  -2  -1 938.100 64.6261   4
   2  -2   1 896.087 63.8105   1
  -2  -2  -1 929.500 63.4802   3
   2  -2   1 791.337 64.7587   5
  -2  -2  -1 930.519 62.1383   1
   2  -2   1 966.421 63.4597   2
  -2   2  -1 991.803 64.2184   1
   2   2   1 1021.53 61.8456   1
  -2   2  -1 963.615 64.2396   1
  -2   2  -1 934.870 65.5076   5
  -2   2  -1 946.561 61.8963   4
  -2   2  -1 993.658 63.1391   2
   2   2   1 997.399 61.8437   1
  -3  -2  -1 415.380 31.1914   4
  -3  -2  -1 426.646 32.9031   2
  -3  -2  -1 453.319 30.4716   3
   3  -2   1 443.337 30.4653   2
  -3   2  -1 396.592 29.9488   1
  -3   2  -1 390.857 29.8227   1
  -3   2  -1 407.679 27.9893   4
  -3   2  -1 371.011 32.7657   5
  -3   2  -1 376.096 29.5290   2
  -4  -2  -1 244.456 24.8857   2
  -4  -2  -1 254.764 22.3770   3
  -4  -2  -1 262.851 23.3289   4
  -4  -2  -1 246.282 24.6005   5
  -4   2  -1 248.239 20.4822   1
  -4   2  -1 245.822 20.8316   1
  -4   2  -1 262.114 19.0325   4
  -4   2  -1 235.582 26.0105   5
  -4   2  -1 263.154 22.0938   2
  -5  -2  -1 25.1004 11.9288   5
  -5  -2  -1 22.5297 9.84584   4
  -5  -2  -1 22.2379 9.28612   3
  -5  -2  -1 38.3016 12.2170   2
  -5   2  -1 53.9463 15.5022   5
  -5   2  -1 34.1587 6.99119   1
  -5   2  -1 17.8752 8.83224   2
  -5  -3   1 108.191 16.1668   3
  -5  -3   1 110.534 15.8497   4
  -5  -3   1 95.9462 18.2088   2
  -5   3   1 90.8599 15.3258   2
  -5   3   1 92.6537 19.1811   5
  -5   3   1 90.1002 13.9765   1
  -4  -3   1 42.2483 10.3462   4
  -4  -3   1 32.9920 11.6127   2
  -4  -3   1 20.3634 6.88802   3
  -4   3   1 31.9670 8.39035   1
  -4   3   1 55.4088 14.0725   5
  -4   3   1 37.9657 8.84261   2
  -3  -3   1 753.792 50.4649   3
  -3  -3   1 764.123 49.6330   1
   3  -3  -1 772.329 52.3365   1
   3  -3  -1 780.819 52.2217   2
  -3  -3   1 772.288 53.1736   4
   3   3  -1 711.730 49.1735   1
  -3   3   1 726.575 52.5184   1
   3   3  -1 753.621 49.2226   1
  -3   3   1 698.062 51.1186   2
  -3   3   1 726.809 54.6309   5
  -3   3   1 677.299 52.1525   1
  -2  -3   1 647.521 47.0260   1
  -2  -3   1 674.927 49.1556   4
   2  -3  -1 560.855 48.6494   5
   2  -3  -1 686.096 47.9599   2
   2  -3  -1 693.929 49.0598   1
  -2  -3   1 667.602 46.5303   3
  -2   3   1 697.236 49.1142   3
   2   3  -1 787.953 49.3574   4
  -2   3   1 749.756 47.6508   2
  -2   3   1 739.101 49.3428   1
  -2   3   1 779.366 49.5353   1
  -2   3   1 663.660 49.4488   5
   2   3  -1 742.601 47.2434   1
  -1  -3   1 3011.77 193.056   4
   1  -3  -1 2976.53 191.043   4
  -1  -3   1 3079.68 191.794   5
  -1  -3   1 3087.47 192.630   1
   1  -3  -1 2918.07 193.366   3
  -1  -3   1 3059.87 191.395   3
   1  -3  -1 2938.17 193.127   1
   1  -3  -1 3117.61 193.802   1
   1  -3  -1 3086.61 192.170   2
   1  -3  -1 2672.71 192.545   5
   1   3  -1 2865.12 191.246   3
  -1   3   1 2962.91 193.478   1
  -1   3   1 2790.39 192.385   5
  -1   3   1 3054.96 192.067   2
   1   3  -1 2810.24 192.435   1
   1   3  -1 2906.66 192.584   1
  -1   3   1 2825.02 192.906   3
   1   3  -1 2824.62 192.828   4
  -1   3   1 3074.06 193.737   1
   0  -3   1 2274.63 156.679   3
   0  -3  -1 2306.80 155.871   5
   0  -3  -1 2279.28 156.793   3
   0  -3  -1 2402.94 157.459   1
   0  -3  -1 2274.87 157.536   1
   0  -3   1 2260.50 156.587   4
   0  -3  -1 2239.43 156.604   4
   0  -3   1 2327.05 157.594   1
   0  -3   1 2497.08 156.138   5
   0  -3   1 2311.19 157.267   1
   0   3  -1 2469.60 157.679   1
   0   3   1 2549.35 156.800   3
   0   3  -1 2478.59 156.606   3
   0   3   1 2504.39 157.863   1
   0   3   1 2622.01 157.782   1
   0   3  -1 2487.11 156.746   4
   0   3  -1 2555.26 157.756   1
  -1  -3  -1 595.356 41.3717   1
  -1  -3  -1 634.734 41.7615   1
   1  -3   1 594.019 42.4998   1
  -1  -3  -1 636.695 40.4171   5
   1  -3   1 633.420 40.6367   2
   1  -3   1 650.812 40.2501   4
   1  -3   1 606.492 42.2785   1
  -1  -3  -1 639.425 42.4386   4
  -1  -3  -1 656.751 41.0998   3
   1  -3   1 570.211 41.8995   5
  -1   3  -1 562.964 42.0856   3
   1   3   1 606.194 41.7139   1
  -1   3  -1 602.181 42.7112   1
   1   3   1 573.692 41.3245   1
  -1   3  -1 580.214 42.6018   1
  -1   3  -1 601.854 40.2809   4
   1   3   1 542.616 40.8207   3
  -1   3  -1 586.197 41.6674   5
   2  -3   1 1394.53 93.2682   1
   2  -3   1 1494.77 91.9412   2
  -2  -3  -1 1411.19 91.8982   3
  -2  -3  -1 1350.64 91.2770   1
  -2  -3  -1 1408.87 93.7523   4
  -2   3  -1 1427.86 91.3589   2
  -2   3  -1 1350.71 93.8143   5
  -2   3  -1 1388.84 93.4867   1
   2   3   1 1395.23 92.2177   3
   2   3   1 1337.03 91.2940   1
   2   3   1 1309.68 91.1269   1
  -2   3  -1 1415.32 93.6276   1
  -3  -3  -1 277.322 22.4645   3
  -3  -3  -1 273.807 25.5885   2
   3  -3   1 286.374 22.6357   2
  -3  -3  -1 300.911 24.9188   4
   3  -3   1 298.249 23.5436   1
  -3   3  -1 292.041 23.7302   1
  -3   3  -1 293.467 22.0602   2
  -3   3  -1 294.224 23.8625   1
  -3   3  -1 287.296 26.0581   5
  -4  -3  -1 237.031 21.0742   3
  -4  -3  -1 245.445 25.6997   2
  -4  -3  -1 229.990 23.1280   4
  -4   3  -1 252.129 20.8182   2
  -4   3  -1 236.121 21.3682   1
  -4   3  -1 260.033 27.5581   5
  -5  -3  -1 4.23127 9.78856   5
  -5  -3  -1 17.3618 9.39651   4
  -5  -3  -1 17.3351 8.53295   3
  -5  -3  -1 20.0393 10.9575   2
  -5   3  -1 0.35468 13.7069   5
  -5   3  -1 21.2922 7.39435   1
  -5  -4   1 38.4151 12.2388   4
  -5  -4   1 39.6372 14.4337   2
  -5   4   1 42.8088 17.2659   5
  -5   4   1 40.2870 10.9740   1
  -4  -4   1 87.9561 14.3353   4
  -4  -4   1 111.208 18.7216   2
  -4  -4   1 96.3039 8.81744   1
  -4  -4   1 93.7038 11.3120   3
  -4   4   1 89.0618 13.0765   2
  -4   4   1 92.3563 18.6863   5
  -4   4   1 103.635 15.1528   1
  -3  -4   1 239.591 18.1532   1
   3  -4  -1 255.765 20.5116   2
  -3  -4   1 238.153 22.2925   4
  -3  -4   1 240.729 18.0678   3
  -3  -4   1 258.216 24.7415   2
   3  -4  -1 249.483 21.6705   1
  -3   4   1 231.745 19.6555   2
   3   4  -1 216.143 17.7525   1
  -3   4   1 200.608 21.2614   1
  -3   4   1 218.919 23.9061   5
  -3   4   1 227.728 21.6466   1
  -2  -4   1 470.441 32.8651   1
  -2  -4   1 427.033 32.4195   5
  -2  -4   1 463.322 34.8383   4
  -2  -4   1 443.136 31.5712   3
   2  -4  -1 470.573 33.1553   2
   2  -4  -1 468.313 34.9771   1
   2   4  -1 464.271 31.8634   3
   2   4  -1 451.757 32.8501   1
  -2   4   1 458.317 35.0407   1
  -2   4   1 486.911 33.1057   2
  -2   4   1 460.334 35.2644   1
  -2   4   1 456.545 34.9452   5
   1  -4  -1 391.896 31.7681   3
  -1  -4   1 392.452 29.6498   3
   1  -4  -1 359.499 30.6017   5
   1  -4  -1 416.344 32.3982   1
   1  -4  -1 426.021 29.4364   4
   1  -4  -1 415.927 30.3520   2
   1  -4  -1 412.850 31.7632   1
  -1  -4   1 499.421 29.8725   5
  -1  -4   1 403.236 31.5825   4
  -1  -4   1 401.641 30.9494   1
   1   4  -1 456.377 29.5635   3
   1   4  -1 427.824 31.4997   4
  -1   4   1 437.709 31.3244   3
  -1   4   1 455.575 32.8478   1
   1   4  -1 376.950 30.0557   5
  -1   4   1 475.467 30.8733   5
  -1   4   1 484.659 33.1128   1
   1   4  -1 462.233 31.6956   1
   1   4  -1 441.672 31.4894   1
   0  -4  -1 49.9306 6.15966   5
   0  -4  -1 55.5230 8.93168   1
   0  -4  -1 44.2135 7.53799   3
   0  -4  -1 59.7032 9.38186   1
   0  -4   1 52.7144 8.90427   1
   0  -4  -1 47.2313 7.33649   4
   0  -4   1 50.1424 7.86906   3
   0  -4   1 49.1827 7.21087   4
   0  -4   1 52.9359 6.30884   5
   0  -4   1 57.5417 9.61925   1
   0   4  -1 41.7191 6.80590   4
   0   4   1 46.1708 7.77563   1
   0   4   1 55.0143 6.49757   5
   0   4  -1 49.8126 8.69925   1
   0   4  -1 51.2658 6.90119   5
   0   4  -1 41.0732 6.52746   3
   0   4   1 48.0921 6.59363   3
   0   4   1 36.3485 7.66916   1
   0   4  -1 39.4255 8.01571   1
   1  -4   1 1504.14 95.7493   1
   1  -4   1 1571.51 93.3950   2
   1  -4   1 1450.02 95.1455   1
  -1  -4  -1 1440.63 94.2738   1
   1  -4   1 1367.78 94.3911   5
  -1  -4  -1 1436.44 95.0047   4
  -1  -4  -1 1550.61 93.7692   3
   1  -4   1 1490.40 92.8822   4
  -1  -4  -1 1423.15 94.5816   1
   1   4   1 1300.46 94.1758   1
  -1   4  -1 1352.93 94.6497   3
  -1   4  -1 1372.51 95.5731   1
  -1   4  -1 1342.29 95.4826   1
   1   4   1 1325.16 94.4719   1
  -1   4  -1 1356.24 92.8516   4
  -1   4  -1 1338.08 93.7344   5
   1   4   1 1406.80 93.3573   3
   2  -4   1 457.531 33.3036   1
  -2  -4  -1 416.126 30.3483   5
  -2  -4  -1 473.421 30.8321   3
  -2  -4  -1 424.497 30.7860   1
   2  -4   1 460.668 30.7369   2
  -2  -4  -1 431.728 33.1637   4
  -2   4  -1 407.127 32.6825   5
  -2   4  -1 405.736 33.3018   1
  -2   4  -1 432.667 30.3544   2
   2   4   1 413.933 30.8699   3
  -2   4  -1 423.369 33.2959   1
   3  -4   1 266.054 21.0377   2
  -3  -4  -1 255.108 20.6602   3
   3  -4   1 273.432 23.1413   1
  -3  -4  -1 256.690 24.1341   4
  -3   4  -1 270.444 20.5120   2
  -3   4  -1 278.139 23.7037   1
  -3   4  -1 270.411 25.0458   5
  -3   4  -1 247.747 23.0616   1
   3   4   1 250.631 18.7308   1
  -4  -4  -1 143.461 15.2714   3
  -4  -4  -1 175.726 19.8136   4
  -4  -4  -1 157.085 20.7797   2
  -4   4  -1 133.056 14.9041   2
  -4   4  -1 159.186 23.3812   5
  -4   4  -1 166.204 17.7854   1
  -5  -4  -1 78.1487 18.3116   2
  -5  -4  -1 92.1070 16.4530   4
  -5  -4  -1 78.8373 15.5974   5
  -5   4  -1 78.2505 18.1932   5
  -5   4  -1 86.7713 13.4996   1
  -5  -5   1 33.3589 12.2530   4
  -5  -5   1 18.7484 14.5120   2
  -5   5   1 20.5188 10.1316   1
  -5   5   1 25.4794 16.9969   5
  -4  -5   1 49.6541 14.3561   2
  -4  -5   1 29.9767 10.8351   4
  -4  -5   1 49.7532 9.06699   3
  -4   5   1 43.0713 14.3376   5
  -4   5   1 43.3823 10.5065   2
  -4   5   1 54.9693 12.4382   1
  -3  -5   1 272.828 20.1902   1
  -3  -5   1 247.115 19.2167   3
  -3  -5   1 282.415 26.0823   2
   3  -5  -1 278.092 24.0414   1
   3  -5  -1 235.770 21.3072   2
  -3  -5   1 237.114 23.9433   4
   3   5  -1 232.913 19.8149   1
  -3   5   1 238.613 24.1687   1
  -3   5   1 247.312 25.7097   5
  -3   5   1 229.705 23.8216   1
  -2  -5   1 193.383 15.7300   3
  -2  -5   1 217.122 17.7107   1
  -2  -5   1 204.896 16.5873   5
  -2  -5   1 193.514 19.4696   4
   2  -5  -1 191.598 17.3736   2
   2  -5  -1 177.662 19.5798   1
   2   5  -1 198.921 17.5669   1
  -2   5   1 188.919 19.9077   1
  -2   5   1 230.646 21.0446   1
   2   5  -1 204.865 15.8663   3
  -2   5   1 199.878 18.6839   5
  -1  -5   1 324.178 25.3500   3
   1  -5  -1 332.043 24.9471   4
   1  -5  -1 293.743 25.9430   5
   1  -5  -1 319.893 25.8452   2
  -1  -5   1 357.795 24.6153   5
   1  -5  -1 345.405 28.5489   1
   1  -5  -1 330.480 27.9850   3
  -1  -5   1 323.816 26.9945   4
  -1  -5   1 313.421 26.6536   1
  -1   5   1 405.088 26.1208   5
   1   5  -1 357.864 27.3867   1
   1   5  -1 327.024 25.4696   5
   1   5  -1 394.387 25.0898   3
  -1   5   1 382.698 29.0021   1
  -1   5   1 409.693 29.3222   1
   0  -5  -1 701.440 49.7914   3
   0  -5  -1 675.868 49.2214   4
   0  -5   1 709.323 49.2760   4
   0  -5   1 674.681 49.5089   3
   0  -5  -1 651.078 47.9595   5
   0  -5   1 724.995 51.1391   1
   0  -5  -1 679.555 50.8712   1
   0  -5  -1 659.529 50.1322   1
   0  -5   1 668.765 50.1086   1
   0  -5   1 658.702 48.1744   5
   0   5  -1 781.368 51.4917   1
   0   5  -1 748.733 49.3479   4
   0   5   1 753.301 49.2434   3
   0   5   1 728.304 51.0539   1
   0   5  -1 766.721 48.3462   5
   0   5  -1 709.129 48.8652   3
   0   5   1 772.607 47.9162   5
  -1  -5  -1 319.398 25.7799   4
   1  -5   1 319.539 23.5843   2
  -1  -5  -1 294.107 23.7579   3
  -1  -5  -1 282.037 25.0450   1
  -1  -5  -1 304.406 24.9747   1
   1  -5   1 300.712 26.4036   1
   1  -5   1 331.647 23.2953   4
  -1  -5  -1 351.796 22.4569   5
  -1   5  -1 324.939 26.6537   1
   1   5   1 305.549 23.4156   3
  -1   5  -1 325.887 23.2606   4
  -1   5  -1 321.636 24.2102   5
   1   5   1 303.431 25.1089   1
  -1   5  -1 326.954 27.1389   1
   2  -5   1 355.471 29.6476   1
   2  -5   1 330.194 24.3429   4
  -2  -5  -1 357.460 29.6423   4
  -2  -5  -1 350.413 25.8107   5
   2  -5   1 333.442 26.2515   2
  -2  -5  -1 335.853 27.0018   1
  -2  -5  -1 339.753 26.3478   3
  -2   5  -1 404.593 30.4417   1
   2   5   1 380.976 27.3014   1
  -2   5  -1 397.829 29.3337   5
  -2   5  -1 453.444 31.2540   1
   2   5   1 365.314 26.6794   3
  -3  -5  -1 137.416 13.6737   3
   3  -5   1 143.784 14.1317   2
  -3  -5  -1 171.271 18.1955   4
   3  -5   1 167.996 18.2386   1
   3   5   1 119.661 13.4639   1
  -3   5  -1 134.477 17.7267   1
  -3   5  -1 164.048 18.5625   1
  -3   5  -1 158.205 14.5091   2
  -3   5  -1 153.222 18.7665   5
  -4  -5  -1 107.642 17.0032   4
  -4  -5  -1 95.1472 19.0206   2
  -4  -5  -1 92.4677 12.0715   3
  -4   5  -1 97.4692 16.2100   1
  -4   5  -1 82.3974 18.7423   5
  -5  -5  -1 27.1547 12.9578   4
  -5  -5  -1 22.5157 10.5225   5
  -5  -5  -1 13.4425 11.9017   2
  -5   5  -1 20.7302 9.61579   1
  -5   5  -1 8.56245 14.5846   5
  -5  -6   1 33.9158 25.0471   2
  -5  -6   1 49.5611 13.8017   4
  -5   6   1 23.6217 12.7162   1
  -4  -6   1 57.3789 15.8471   2
  -4  -6   1 83.4071 15.8379   4
  -4   6   1 79.3113 16.0793   1
  -4   6   1 62.8548 18.1821   5
   3  -6  -1 140.890 18.1262   1
  -3  -6   1 129.478 17.6590   4
  -3  -6   1 143.517 13.1030   3
  -3   6   1 159.758 20.0533   1
  -3   6   1 118.754 19.4981   5
  -2  -6   1 216.636 18.7455   1
   2  -6  -1 229.257 22.3897   1
  -2  -6   1 200.954 16.8484   3
   2  -6  -1 218.329 15.0366   4
  -2  -6   1 194.222 20.7242   4
  -2   6   1 218.941 22.7063   1
   2   6  -1 183.198 16.4519   3
  -2   6   1 183.140 18.9066   5
   2   6  -1 192.833 18.6903   1
  -1  -6   1 184.242 16.9354   3
  -1  -6   1 190.684 18.3711   1
  -1  -6   1 189.314 18.9207   4
   1  -6  -1 186.404 16.4295   4
   1  -6  -1 219.203 21.0672   1
  -1  -6   1 222.981 15.9895   5
   1   6  -1 212.656 19.5085   1
   1   6  -1 146.799 16.3904   5
  -1   6   1 210.342 21.4346   1
   1   6  -1 190.380 15.8746   3
  -1   6   1 210.590 17.2025   5
   0  -6   1 3.22303 6.08194   3
   0  -6  -1 11.9575 6.46917   3
   0  -6   1 6.76551 7.70492   1
   0  -6  -1 -1.8180 3.57873   5
   0  -6  -1 7.74966 6.11164   1
   0  -6   1 1.56437 6.34265   1
   0  -6   1 1.27042 5.73665   4
   0  -6  -1 9.72569 7.16230   1
   0  -6  -1 6.35404 5.85274   4
   0   6   1 7.02462 6.85481   1
   0   6   1 11.1761 5.64088   5
   0   6  -1 6.75909 5.89457   5
   0   6  -1 7.02761 7.67242   1
   1  -6   1 530.811 38.3333   2
  -1  -6  -1 519.629 38.9580   3
   1  -6   1 540.964 42.0503   1
   1  -6   1 534.893 38.1113   4
  -1  -6  -1 513.562 40.4360   4
  -1  -6  -1 542.783 40.8189   1
  -1  -6  -1 574.088 37.1691   5
  -1  -6  -1 516.683 39.9116   1
   1   6   1 562.205 40.8653   1
  -1   6  -1 591.071 38.9324   5
  -1   6  -1 594.489 42.7751   1
   1   6   1 475.522 37.5700   5
  -2  -6  -1 226.423 19.1871   3
   2  -6   1 250.906 23.8296   1
   2  -6   1 241.299 17.1574   4
  -2  -6  -1 244.737 20.3229   1
   2  -6   1 210.317 18.8999   2
  -2  -6  -1 265.672 22.8863   4
  -2  -6  -1 273.107 18.3965   5
  -2   6  -1 201.366 21.4042   5
   2   6   1 208.995 20.1404   1
  -2   6  -1 214.116 23.7565   1
   2   6   1 204.748 20.8392   3
  -3  -6  -1 69.9696 14.7768   4
   3  -6   1 66.0807 13.1455   1
  -3  -6  -1 57.1750 9.23810   3
  -3   6  -1 51.0352 13.8736   5
  -3   6  -1 70.1014 13.7477   1
  -4  -6  -1 15.3758 10.6687   4
  -4  -6  -1 22.3292 12.5490   2
  -4   6  -1 13.2099 10.3989   1
  -4   6  -1 -7.0562 13.2067   5
  -4  -7   1 148.965 21.3188   4
  -4  -7   1 152.234 23.8157   2
  -4   7   1 98.8373 19.3411   5
  -4   7   1 117.678 19.4151   1
   3  -7  -1 139.736 18.9331   1
  -3  -7   1 118.993 18.3535   4
  -3   7   1 95.1442 17.2547   5
  -3   7   1 73.9907 16.0133   1
   2  -7  -1 108.725 17.5201   1
  -2  -7   1 99.4945 15.2756   4
   2  -7  -1 94.1763 9.53577   4
  -2  -7   1 80.3411 11.5891   3
  -2   7   1 130.592 19.2926   1
  -2   7   1 115.951 15.1030   5
   2   7  -1 90.4867 13.9300   1
   1  -7  -1 104.317 15.9906   1
   1  -7  -1 80.8431 10.5428   4
  -1  -7   1 67.2983 11.9658   4
  -1  -7   1 72.8894 11.2038   3
  -1  -7   1 83.5645 12.9605   1
  -1   7   1 70.5460 11.5315   5
  -1   7   1 63.3455 13.4006   1
   1   7  -1 67.3889 11.6304   5
   1   7  -1 58.0958 11.6219   1
   0  -7  -1 423.269 35.4080   1
   0  -7  -1 426.572 33.2052   4
   0  -7   1 395.597 32.5050   4
   0  -7  -1 436.620 33.9678   3
   0   7  -1 428.360 32.1970   5
   0   7   1 434.468 31.3073   5
   0   7  -1 455.773 36.6542   1
   0   7   1 441.366 36.1454   1
  -1  -7  -1 25.5639 6.01996   5
  -1  -7  -1 42.9045 10.1003   4
  -1  -7  -1 20.6258 7.78122   1
   1  -7   1 31.6314 7.46722   4
   1  -7   1 37.1111 11.3257   1
  -1  -7  -1 32.4390 10.5260   1
  -1  -7  -1 41.1102 9.02812   3
   1   7   1 28.2754 10.0523   1
  -1   7  -1 23.5413 8.96716   5
   1   7   1 24.3989 7.01016   5
  -1   7  -1 28.8048 10.6972   1
   2  -7   1 385.302 33.2447   1
   2  -7   1 346.907 25.5912   4
  -2  -7  -1 378.900 31.2892   4
  -2  -7  -1 353.787 28.0076   3
  -2   7  -1 356.534 33.4767   1
  -2   7  -1 357.361 29.0493   5
  -3  -7  -1 47.4100 13.0327   4
  -3  -7  -1 50.6929 9.02659   3
  -3   7  -1 38.2874 12.4298   5
  -3   7  -1 46.4997 13.5114   1
  -4  -7  -1 63.5559 14.5317   4
  -4  -7  -1 48.1621 17.4025   2
  -4   7  -1 36.9214 16.8793   5
  -4   7  -1 57.1746 15.3669   1
  -4   8   1 3.06041 15.0819   5
  -3  -8   1 85.9312 17.3029   4
  -3   8   1 72.4971 16.6555   1
  -3   8   1 59.8993 14.9829   5
  -2  -8   1 -0.1226 9.63634   4
   2  -8  -1 12.2406 10.6190   1
  -2  -8   1 2.62638 6.43569   3
  -2   8   1 5.20225 10.3171   1
  -2   8   1 -0.2108 9.87819   5
  -1  -8   1 48.2743 11.5094   4
   1  -8  -1 50.8190 12.8083   1
   1  -8  -1 50.7489 9.24454   4
  -1  -8   1 40.6156 9.85815   3
  -1   8   1 40.8092 12.7776   1
   1   8  -1 45.9650 9.96879   5
  -1   8   1 24.8080 9.25966   5
   1   8  -1 27.3503 11.0154   1
   0  -8  -1 76.7565 14.5624   1
   0  -8  -1 47.1179 10.5367   4
   0  -8  -1 68.8239 12.6823   3
   0  -8   1 66.1124 11.1689   4
   0   8  -1 45.0418 10.5616   5
   0   8   1 48.5233 13.7707   1
   0   8   1 58.0799 10.0686   5
   0   8  -1 60.8707 14.4987   1
  -1  -8  -1 222.126 22.3073   4
   1  -8   1 227.196 19.4610   4
  -1  -8  -1 208.294 20.4811   3
  -1   8  -1 217.200 26.5799   1
  -1   8  -1 190.124 19.9419   5
  -2  -8  -1 60.8294 14.1507   4
  -2  -8  -1 74.3958 11.4247   3
  -2   8  -1 23.3932 11.4140   5
  -2   8  -1 53.1799 15.3850   1
  -3  -8  -1 49.0784 13.4690   4
  -3   8  -1 12.5332 12.9276   5
  -3   8  -1 31.7570 13.6898   1
  -4   8  -1 1.56853 15.2764   5
  -3  -9   1 -7.0891 9.13459   4
  -3   9   1 -0.7275 12.2943   1
  -3   9   1 -7.1316 12.0025   5
   2  -9  -1 17.2776 12.5241   1
  -2  -9   1 12.4917 10.7595   4
  -2   9   1 12.2732 10.9948   5
  -2   9   1 27.0085 15.2298   1
   1  -9  -1 23.0258 8.70315   4
  -1  -9   1 15.1554 9.73135   4
   1  -9  -1 8.14744 11.1996   1
   1   9  -1 45.1256 10.1586   5
  -1   9   1 21.0119 10.4050   5
  -1   9   1 39.2457 14.8152   1
   0  -9  -1 81.0947 17.0435   1
   0  -9  -1 91.5760 14.4093   4
   0  -9   1 80.7797 13.5672   4
   0  -9  -1 79.9225 15.4893   3
   0   9  -1 86.9368 14.5918   5
   0   9   1 79.4532 17.3784   1
   0   9   1 109.059 14.3114   5
   0   9  -1 82.3639 16.8198   1
  -1  -9  -1 52.1371 12.2128   4
  -1  -9  -1 66.7041 12.3734   3
   1  -9   1 51.6731 10.3297   4
  -1   9  -1 40.6928 12.0429   5
  -1   9  -1 70.0509 17.1695   1
  -2  -9  -1 65.7675 13.2087   3
  -2  -9  -1 65.6886 15.1636   4
  -2   9  -1 61.2300 17.5407   1
  -2   9  -1 45.9554 13.7157   5
  -3  -9  -1 30.8969 12.5021   4
  -3   9  -1 20.9688 15.0524   1
  -3   9  -1 10.0626 13.9302   5
  -2 -10   1 22.7236 11.6121   4
  -2  10   1 55.3867 19.2019   1
  -2  10   1 7.58800 12.2815   5
  -1 -10   1 13.3390 10.0449   4
  -1  10   1 22.4533 15.7233   1
  -1  10   1 -0.8295 10.2927   5
   0 -10   1 15.8809 9.95111   4
   0 -10  -1 -1.0479 8.86693   4
   0  10  -1 23.3387 13.0753   1
   0  10   1 8.82576 12.6848   1
   0  10  -1 19.2296 9.99075   5
  -1 -10  -1 54.9894 13.2624   4
  -1 -10  -1 34.2279 12.5772   3
  -1  10  -1 36.9559 12.9880   5
  -1  10  -1 75.1905 18.6322   1
  -2 -10  -1 3.09879 10.6802   4
  -2  10  -1 6.40073 14.3025   1
  -2  10  -1 -9.0617 12.6745   5
  -6   0   2 7.15582 14.3076   5
  -6   0   2 10.4730 12.0316   2
  -5   0   2 2.12612 3.47250   1
  -5   0   2 0.84999 6.11179   4
  -5   0   2 -7.0006 8.60604   2
  -5   0   2 6.44150 11.5643   5
  -4   0   2 32.9473 12.3712   5
  -4   0   2 24.0819 9.18048   2
  -4   0   2 28.5795 5.33262   1
  -4   0   2 33.3085 7.00838   4
   4   0  -2 31.9844 4.93952   1
  -4   0   2 32.2803 5.62327   1
   3   0  -2 493.903 35.2077   2
  -3   0   2 455.932 33.9962   2
  -3   0   2 437.203 32.0064   4
  -3   0   2 438.961 31.4643   1
   3   0  -2 445.691 31.1280   1
   2   0  -2 1222.51 81.2364   2
  -2   0   2 1205.84 79.5395   1
  -2   0   2 1183.96 81.0117   2
  -2   0   2 1211.47 79.5303   4
   2   0  -2 1204.99 79.5536   4
  -1   0   2 382.636 25.7132   3
   1   0  -2 390.615 25.7148   4
  -1   0   2 379.643 26.6287   2
   1   0  -2 376.260 26.6076   2
  -1   0   2 368.700 25.9886   1
  -1   0   2 388.026 25.6665   4
   1   0  -2 375.234 25.9768   1
   0   0   2 47.2569 3.93115   3
   0   0  -2 46.1902 4.20148   1
   0   0  -2 48.5271 3.83302   2
   0   0  -2 34.8626 3.52360   3
   0   0  -2 48.3901 4.13123   4
   0   0  -2 41.9572 3.46501   5
   0   0   2 42.5217 3.37145   5
   0   0   2 42.3179 4.28997   1
   0   0   2 43.0372 3.97312   4
   1   0   2 2863.15 186.581   1
   1   0   2 2718.34 187.644   5
  -1   0  -2 2981.42 186.706   1
  -1   0  -2 2985.52 187.774   5
  -2   0  -2 479.560 32.8878   2
  -2   0  -2 459.283 30.6705   1
  -2   0  -2 465.165 30.7442   1
  -2   0  -2 444.218 33.6470   5
  -3   0  -2 234.020 18.7961   4
  -3   0  -2 241.487 16.3760   1
  -3   0  -2 217.465 21.7675   5
  -3   0  -2 235.904 16.2974   1
  -3   0  -2 239.446 20.0346   2
  -4   0  -2 69.9986 10.5275   4
  -4   0  -2 105.456 16.7258   5
  -4   0  -2 72.5954 13.1074   2
  -5   0  -2 56.1504 10.7545   4
  -5   0  -2 62.7675 14.7548   5
  -5   0  -2 75.3628 13.9662   2
  -6  -1   2 21.5269 14.7788   5
  -6  -1   2 13.9535 12.4649   2
  -6   1   2 7.28107 14.7529   2
  -6   1   2 27.2040 25.2534   5
  -5  -1   2 60.8824 14.2188   2
  -5  -1   2 53.8131 10.5426   4
  -5  -1   2 79.7397 16.2521   5
  -5   1   2 57.5298 13.2150   2
  -5   1   2 65.4775 9.57293   1
  -5   1   2 64.5656 17.7643   5
  -4  -1   2 300.737 27.2728   2
  -4  -1   2 309.725 21.2512   1
   4  -1  -2 304.555 22.2146   1
  -4  -1   2 312.614 24.4918   4
  -4   1   2 283.954 22.8143   1
  -4   1   2 278.919 22.1660   4
  -4   1   2 293.778 26.1947   2
  -4   1   2 300.155 22.9773   1
  -4   1   2 271.736 28.1204   5
  -3  -1   2 254.935 20.9502   4
   3  -1  -2 259.915 19.8784   1
  -3  -1   2 296.313 19.2611   1
  -3  -1   2 268.850 23.2850   2
   3  -1  -2 282.142 22.6402   2
  -3   1   2 231.977 23.6193   5
  -3   1   2 256.575 19.2363   4
   3   1  -2 257.076 18.5779   1
  -3   1   2 250.631 21.8085   2
  -3   1   2 269.880 20.5496   1
   2  -1  -2 876.282 58.4489   2
   2  -1  -2 821.901 57.4240   1
  -2  -1   2 843.558 57.6589   4
   2  -1  -2 857.898 56.2603   4
  -2  -1   2 843.350 59.0173   2
  -2  -1   2 831.537 56.6491   1
   2   1  -2 893.019 57.8243   4
  -2   1   2 854.160 58.1843   2
  -2   1   2 909.344 57.8284   1
  -2   1   2 786.322 59.1861   5
   2   1  -2 872.708 56.6431   1
  -2   1   2 860.425 56.1825   4
   1  -1  -2 789.499 54.9500   2
   1  -1  -2 784.952 54.9518   3
   1  -1  -2 753.726 54.8991   1
  -1  -1   2 756.373 54.6425   4
   1  -1  -2 793.654 53.6386   4
  -1  -1   2 761.311 54.4640   1
   1   1  -2 833.065 55.5075   2
  -1   1   2 877.100 54.9708   2
  -1   1   2 891.702 54.9962   3
  -1   1   2 857.613 55.2151   1
  -1   1   2 913.567 53.6855   4
   1   1  -2 868.094 54.9104   4
   1   1  -2 829.402 54.5302   1
   0  -1   2 388.166 25.5089   2
   0  -1   2 411.999 25.7280   4
   0  -1  -2 393.495 26.1239   1
   0  -1  -2 424.480 25.8725   2
   0  -1  -2 390.644 25.7601   3
   0  -1   2 373.532 26.0191   1
   0   1  -2 405.987 25.4303   5
   0   1   2 337.771 24.9159   5
   0   1  -2 350.312 25.9935   1
   0   1   2 358.879 26.0506   1
   0   1   2 385.493 25.8989   2
   0   1  -2 387.969 25.6912   4
   0   1   2 365.895 25.6345   3
   1  -1   2 701.036 42.2343   1
   1  -1   2 668.385 43.0106   5
  -1  -1  -2 726.470 41.5137   1
  -1   1  -2 583.600 42.0815   1
  -1   1  -2 604.130 42.1530   1
  -1   1  -2 631.479 41.6180   4
   1   1   2 601.420 41.2527   1
  -1   1  -2 597.716 42.6219   5
  -1   1  -2 623.535 41.2427   2
   1   1   2 594.375 41.2063   1
   1   1   2 602.193 42.4142   3
  -2  -1  -2 98.9081 10.4308   5
  -2  -1  -2 83.7248 9.50011   3
   2  -1   2 82.2807 7.70391   1
   2  -1   2 79.4104 10.2122   5
  -2   1  -2 79.5619 8.38077   2
  -2   1  -2 87.1952 8.30610   1
  -2   1  -2 87.4230 10.7911   5
  -2   1  -2 75.9557 7.97347   1
  -3  -1  -2 144.595 14.0811   2
  -3  -1  -2 122.785 14.3345   5
  -3  -1  -2 139.288 12.4024   4
  -3  -1  -2 152.121 13.5400   3
  -3   1  -2 98.2699 11.2738   2
  -3   1  -2 94.4522 14.0010   5
  -3   1  -2 90.7596 9.73444   1
  -3   1  -2 104.668 10.3539   4
  -3   1  -2 94.4602 9.93083   1
  -4  -1  -2 77.4013 12.3657   4
  -4  -1  -2 89.7182 15.5966   5
  -4  -1  -2 77.0603 13.9515   2
  -4  -1  -2 72.4678 12.9297   3
  -4   1  -2 123.126 17.0476   5
  -4   1  -2 95.4345 9.41256   1
  -4   1  -2 95.1591 12.9227   2
  -4   1  -2 95.3218 11.3335   4
  -4   1  -2 96.7125 9.28825   1
  -5  -1  -2 33.7401 9.44338   4
  -5  -1  -2 32.0398 13.1678   5
  -5  -1  -2 31.2130 10.5660   3
  -5  -1  -2 33.4868 11.1283   2
  -5   1  -2 29.4896 9.99306   2
  -5   1  -2 35.2863 5.26646   1
  -5   1  -2 57.3637 15.5282   5
  -5  -2   2 10.7773 11.4759   5
  -5  -2   2 14.3898 8.47148   4
  -5  -2   2 24.1970 11.3019   2
  -5  -2   2 9.37326 7.13161   3
  -5   2   2 4.03664 12.1979   5
  -5   2   2 1.51851 5.97426   1
  -5   2   2 12.4994 9.41532   2
  -4  -2   2 35.5575 8.90014   4
  -4  -2   2 39.2307 5.09048   1
   4  -2  -2 38.1445 7.85463   1
  -4  -2   2 44.1995 11.7423   2
  -4  -2   2 44.7146 8.20950   3
  -4   2   2 33.1141 4.94313   4
  -4   2   2 36.5127 9.08156   2
  -4   2   2 25.2452 7.40620   1
  -4   2   2 40.1476 12.7313   5
  -4   2   2 32.9906 7.59955   1
   3  -2  -2 384.003 29.2075   2
  -3  -2   2 397.393 30.7175   2
   3  -2  -2 411.337 28.2812   1
  -3  -2   2 386.917 26.8189   3
  -3  -2   2 357.994 25.7850   1
  -3  -2   2 405.403 28.8916   4
  -3   2   2 384.761 28.2864   1
  -3   2   2 347.078 30.8586   5
  -3   2   2 359.164 28.1934   1
  -3   2   2 354.617 24.7940   4
  -3   2   2 344.864 28.0072   2
   3   2  -2 353.462 25.4344   1
  -2  -2   2 415.263 28.0471   3
   2  -2  -2 402.537 29.9583   2
  -2  -2   2 393.934 31.4826   2
  -2  -2   2 393.385 28.4736   1
  -2  -2   2 415.161 30.1175   4
   2  -2  -2 395.153 30.0324   1
   2   2  -2 403.977 28.4840   1
  -2   2   2 415.322 30.2979   3
  -2   2   2 428.421 30.2617   1
  -2   2   2 395.822 31.3678   5
  -2   2   2 435.195 30.3237   1
  -2   2   2 428.432 29.6322   2
   2   2  -2 427.247 30.1630   4
   1  -2  -2 2302.20 155.689   1
   1  -2  -2 2399.41 155.540   3
  -1  -2   2 2327.92 155.290   4
  -1  -2   2 2365.63 153.534   3
   1  -2  -2 2163.24 155.260   5
  -1  -2   2 2142.06 154.596   5
  -1  -2   2 2366.87 154.936   1
   1  -2  -2 2439.06 155.067   2
   1   2  -2 2398.97 153.571   3
  -1   2   2 2429.94 155.784   1
  -1   2   2 2481.68 154.939   2
   1   2  -2 2502.41 155.447   4
  -1   2   2 2349.26 155.425   5
   1   2  -2 2390.59 154.972   1
  -1   2   2 2491.92 155.813   1
  -1   2   2 2482.34 155.446   3
   0  -2  -2 295.429 19.7184   2
   0  -2  -2 277.396 18.5242   5
   0  -2  -2 302.026 20.4653   1
   0  -2   2 298.514 20.3220   1
   0  -2  -2 275.637 19.5188   3
   0  -2   2 277.768 19.4450   4
   0  -2   2 325.200 19.0737   5
   0   2  -2 240.515 19.2492   4
   0   2  -2 259.647 19.2006   3
   0   2  -2 295.531 19.0528   5
   0   2   2 261.274 20.1309   1
   0   2   2 237.267 20.0532   1
   0   2   2 246.280 19.2687   3
   0   2  -2 245.160 20.1170   1
   0   2  -2 252.432 20.1936   1
   0   2   2 271.481 18.3021   5
   1  -2   2 2717.91 177.218   1
   1  -2   2 2743.14 177.537   5
   1  -2   2 2983.32 175.772   2
  -1  -2  -2 3027.98 176.801   1
   1  -2   2 2988.41 176.077   4
  -1  -2  -2 2868.94 176.841   3
   1   2   2 2541.78 176.470   1
  -1   2  -2 2581.75 177.366   1
  -1   2  -2 2549.80 177.399   1
  -1   2  -2 2562.57 175.932   4
   1   2   2 2526.95 176.776   3
  -1   2  -2 2494.44 177.076   5
  -2  -2  -2 76.4449 8.09745   3
   2  -2   2 57.0236 9.25393   5
  -2  -2  -2 79.3008 9.69393   4
   2  -2   2 72.4360 8.09630   1
   2  -2   2 75.6259 7.24746   2
  -2   2  -2 55.4657 8.13776   1
  -2   2  -2 52.5082 5.70107   4
  -2   2  -2 56.3270 8.24659   1
  -2   2  -2 65.0346 6.47923   2
  -2   2  -2 60.7139 10.1906   5
  -3  -2  -2 313.714 28.5721   2
  -3  -2  -2 331.369 26.5865   3
  -3  -2  -2 330.699 27.3054   4
  -3   2  -2 361.029 25.9166   2
  -3   2  -2 362.186 30.2081   5
  -3   2  -2 376.510 26.5525   1
  -3   2  -2 354.730 24.6242   4
  -3   2  -2 354.178 26.3641   1
  -4  -2  -2 133.132 17.4129   5
  -4  -2  -2 115.796 15.8315   4
  -4  -2  -2 123.113 17.1909   2
  -4  -2  -2 142.574 15.1833   3
  -4   2  -2 118.316 13.9234   2
  -4   2  -2 120.938 12.6694   1
  -4   2  -2 139.034 12.0216   4
  -4   2  -2 111.639 18.3085   5
  -4   2  -2 124.374 13.0292   1
  -5  -2  -2 53.7070 13.2586   5
  -5  -2  -2 60.6995 13.7911   2
  -5  -2  -2 70.0173 12.9249   3
  -5  -2  -2 95.7399 14.0458   4
  -5   2  -2 62.7103 9.28399   1
  -5   2  -2 41.0004 15.4437   5
  -5  -3   2 62.2469 15.7605   2
  -5  -3   2 50.7526 11.7145   4
  -5   3   2 47.2879 15.7080   5
  -5   3   2 47.3240 10.1044   1
  -5   3   2 60.8044 12.2426   2
  -4  -3   2 254.341 26.4016   2
  -4  -3   2 247.679 17.4226   1
  -4  -3   2 238.758 19.6817   3
  -4  -3   2 229.580 22.5305   4
  -4   3   2 224.253 21.6646   2
  -4   3   2 202.438 26.4814   5
  -4   3   2 249.676 22.1236   1
   3  -3  -2 306.762 27.3179   2
  -3  -3   2 330.496 30.1283   2
  -3  -3   2 340.741 25.1112   1
   3  -3  -2 367.480 27.9177   1
  -3  -3   2 338.240 28.1410   4
  -3   3   2 333.244 27.8970   1
   3   3  -2 383.315 24.9646   1
  -3   3   2 381.306 28.0982   1
  -3   3   2 354.329 30.2337   5
  -3   3   2 344.172 26.9761   2
   2  -3  -2 981.458 70.8502   2
  -2  -3   2 962.170 72.5950   2
   2  -3  -2 974.465 71.7648   1
  -2  -3   2 989.308 70.2207   1
  -2  -3   2 954.086 68.9008   3
  -2  -3   2 924.636 71.3953   4
  -2   3   2 1092.56 72.6312   5
  -2   3   2 1134.19 72.2042   1
  -2   3   2 1165.65 72.4248   1
  -2   3   2 1136.06 70.7875   2
   2   3  -2 1183.61 72.0441   4
   2   3  -2 1141.43 70.3943   1
  -2   3   2 1069.31 71.8157   3
  -1  -3   2 583.984 41.8790   4
  -1  -3   2 611.847 41.5375   1
   1  -3  -2 536.134 41.3115   5
   1  -3  -2 536.638 40.8777   2
  -1  -3   2 593.372 39.8618   3
  -1  -3   2 592.789 40.6433   5
   1  -3  -2 581.575 39.8383   4
   1  -3  -2 545.176 42.3482   1
   1  -3  -2 566.524 41.8980   3
   1   3  -2 626.967 41.8450   4
  -1   3   2 639.902 41.9306   3
  -1   3   2 642.526 42.7953   1
   1   3  -2 634.822 41.6570   1
  -1   3   2 619.690 42.5504   1
  -1   3   2 636.719 41.5546   5
   1   3  -2 604.564 41.5345   1
   1   3  -2 628.246 39.7650   3
  -1   3   2 631.989 41.3009   2
   0  -3  -2 724.893 48.5302   3
   0  -3   2 718.518 48.2373   4
   0  -3  -2 700.354 47.1674   5
   0  -3  -2 678.224 49.1518   1
   0  -3   2 698.928 48.9899   1
   0  -3   2 801.941 47.7470   5
   0   3  -2 679.498 48.0856   4
   0   3  -2 702.437 49.1398   1
   0   3  -2 686.129 47.9047   3
   0   3   2 703.758 49.1627   1
   0   3   2 704.509 48.1366   3
   0   3  -2 745.106 47.5882   5
   0   3   2 664.298 49.0230   1
   0   3  -2 692.213 49.0648   1
   0   3   2 755.268 46.8925   5
   1  -3   2 515.189 40.1064   1
  -1  -3  -2 540.599 38.1535   5
  -1  -3  -2 547.629 40.4485   4
   1  -3   2 567.988 40.9597   1
   1  -3   2 526.805 38.3986   4
  -1  -3  -2 535.430 39.6604   1
  -1  -3  -2 529.467 39.4089   1
  -1  -3  -2 523.826 39.1369   3
   1  -3   2 545.534 38.3130   2
   1  -3   2 482.368 39.6854   5
  -1   3  -2 626.023 38.6422   4
   1   3   2 653.727 40.0745   1
  -1   3  -2 671.371 40.2097   5
   1   3   2 650.500 39.6286   3
  -1   3  -2 647.583 41.1860   1
   1   3   2 630.792 39.6917   1
  -1   3  -2 654.452 41.1117   1
  -2  -3  -2 162.544 11.7104   3
  -2  -3  -2 162.578 13.5594   4
  -2   3  -2 115.924 12.6282   1
  -2   3  -2 120.719 12.4571   1
  -2   3  -2 99.1818 13.7019   5
   2   3   2 103.036 9.42649   1
   2   3   2 115.338 11.3277   3
  -2   3  -2 122.837 9.77302   2
   2   3   2 110.684 9.86074   1
  -2   3  -2 106.517 8.81071   4
  -3  -3  -2 67.2492 10.5451   3
   3  -3   2 61.3010 9.65733   2
  -3  -3  -2 74.4353 12.3105   4
  -3   3  -2 101.888 12.0970   1
  -3   3  -2 91.2067 15.5943   5
  -3   3  -2 96.9816 9.61590   2
  -3   3  -2 108.820 12.2252   1
  -3   3  -2 89.9082 7.28614   4
  -3   3  -2 91.1781 7.04685   4
  -4  -3  -2 225.367 23.2537   4
  -4  -3  -2 222.436 25.2753   2
  -4  -3  -2 226.847 21.4907   3
  -4  -3  -2 190.308 23.1731   5
  -4   3  -2 270.596 26.5559   5
  -4   3  -2 292.341 20.9844   2
  -4   3  -2 262.995 21.6666   1
  -5  -3  -2 50.8428 14.2215   2
  -5  -3  -2 59.8706 11.8110   3
  -5  -3  -2 51.4947 13.8102   5
  -5  -3  -2 58.8239 12.9298   4
  -5   3  -2 42.0576 14.8329   5
  -5   3  -2 41.8224 9.12205   1
  -5  -4   2 79.0208 15.0489   4
  -5  -4   2 56.5421 15.4804   2
  -5   4   2 67.5852 12.8056   1
  -5   4   2 95.5172 20.0255   5
  -4  -4   2 1.34957 9.47975   2
  -4  -4   2 14.7252 5.70463   3
  -4  -4   2 12.2248 8.91791   4
  -4   4   2 16.9368 8.57236   1
  -4   4   2 15.3479 13.1303   5
  -4   4   2 32.6062 9.00478   2
  -3  -4   2 226.301 22.2537   4
   3  -4  -2 205.118 21.0018   2
   3  -4  -2 217.712 22.0657   1
  -3  -4   2 223.644 18.4368   3
  -3  -4   2 231.972 19.3718   1
  -3  -4   2 215.894 24.8274   2
   3   4  -2 300.038 19.8769   1
  -3   4   2 264.158 22.9992   1
  -3   4   2 311.960 25.3113   5
  -3   4   2 282.374 21.5186   2
  -3   4   2 305.342 23.9730   1
   2  -4  -2 504.505 39.8524   1
  -2  -4   2 501.162 36.0495   3
  -2  -4   2 509.590 39.4384   4
  -2  -4   2 507.814 37.5170   5
  -2  -4   2 533.160 37.9809   1
   2  -4  -2 489.242 37.9634   2
   2   4  -2 552.648 38.1052   1
  -2   4   2 543.539 39.6052   5
   2   4  -2 580.148 36.4489   3
  -2   4   2 560.125 38.1537   2
  -2   4   2 587.635 40.4576   1
  -2   4   2 574.412 40.4840   1
   1  -4  -2 2450.09 171.211   1
  -1  -4   2 2437.01 170.156   4
   1  -4  -2 2218.12 169.411   5
  -1  -4   2 2522.32 168.543   3
   1  -4  -2 2430.52 169.396   2
  -1  -4   2 2769.35 168.799   5
   1  -4  -2 2488.94 168.394   4
  -1  -4   2 2481.05 170.039   1
   1  -4  -2 2410.37 170.438   3
   1   4  -2 2289.26 168.985   5
  -1   4   2 2732.64 170.353   3
  -1   4   2 2812.39 171.655   1
   1   4  -2 2830.20 170.676   4
   1   4  -2 2739.13 170.488   1
   1   4  -2 2777.06 168.325   3
  -1   4   2 2676.47 169.412   5
  -1   4   2 2781.36 171.539   1
   1   4  -2 2800.96 170.617   1
   0  -4  -2 661.787 46.7201   1
   0  -4  -2 615.232 43.9825   5
   0  -4   2 636.180 45.1142   4
   0  -4  -2 637.074 46.0421   1
   0  -4   2 666.128 46.2190   1
   0  -4  -2 612.667 45.1537   4
   0  -4  -2 669.459 45.6621   3
   0  -4   2 707.722 44.6158   5
   0   4  -2 647.272 46.3972   1
   0   4   2 702.075 43.6809   5
   0   4   2 635.021 45.0678   3
   0   4  -2 620.477 46.3767   1
   0   4  -2 658.686 44.8576   3
   0   4  -2 716.349 44.6289   5
   0   4   2 653.979 46.6026   1
   0   4  -2 628.202 45.2333   4
   0   4   2 649.498 46.6151   1
  -1  -4  -2 558.919 42.9454   4
   1  -4   2 593.129 40.9748   4
   1  -4   2 593.651 43.9101   1
   1  -4   2 565.755 43.0788   1
   1  -4   2 558.245 42.3519   5
  -1  -4  -2 612.248 42.7549   1
  -1  -4  -2 595.768 41.7857   3
   1  -4   2 587.085 40.9225   2
  -1  -4  -2 687.391 40.3953   5
  -1  -4  -2 584.782 42.3577   1
  -1   4  -2 610.025 43.8911   1
  -1   4  -2 650.956 42.1583   5
   1   4   2 604.746 41.7676   3
   1   4   2 609.343 42.5186   1
  -1   4  -2 602.796 42.9323   3
  -1   4  -2 614.269 41.2172   4
  -1   4  -2 624.201 44.0417   1
   1   4   2 615.792 42.7916   1
   2  -4   2 249.217 23.0206   1
  -2  -4  -2 233.921 22.5482   4
  -2  -4  -2 264.532 20.9781   1
  -2  -4  -2 224.029 19.6835   5
  -2  -4  -2 257.094 20.6534   3
   2  -4   2 242.189 19.9171   2
  -2   4  -2 311.476 23.9097   1
  -2   4  -2 311.793 23.3214   5
  -2   4  -2 313.213 23.7409   1
  -2   4  -2 304.915 19.0699   4
   2   4   2 343.738 21.9509   3
   3  -4   2 228.345 18.4487   2
  -3  -4  -2 212.475 18.9915   3
  -3  -4  -2 195.510 20.9309   4
  -3   4  -2 247.811 23.3493   5
  -3   4  -2 213.441 21.2032   1
  -3   4  -2 250.212 18.0885   2
  -3   4  -2 255.063 21.6617   1
   3   4   2 224.928 16.2939   1
  -4  -4  -2 270.720 28.3471   2
  -4  -4  -2 272.751 27.0744   4
  -4  -4  -2 290.441 24.3056   3
  -4   4  -2 279.601 25.6750   1
  -4   4  -2 306.320 29.6783   5
  -4   4  -2 306.793 23.3022   2
  -5  -4  -2 32.7393 11.4624   4
  -5  -4  -2 19.0968 11.1781   2
  -5  -4  -2 14.2920 10.4050   5
  -5   4  -2 48.0869 15.9840   5
  -5   4  -2 9.55554 8.01001   1
  -5  -5   2 15.1166 13.5445   2
  -5  -5   2 -2.2105 9.26013   4
  -5   5   2 23.7172 15.8883   5
  -5   5   2 19.8190 10.4139   1
  -4  -5   2 241.929 26.7915   2
  -4  -5   2 207.901 24.2633   4
  -4   5   2 244.798 26.9674   5
  -4   5   2 241.030 24.7654   1
  -4   5   2 227.102 22.2544   2
  -3  -5   2 196.171 17.3891   1
  -3  -5   2 218.747 24.0662   2
  -3  -5   2 184.799 20.4261   4
   3  -5  -2 178.894 20.4652   1
  -3  -5   2 199.381 15.8506   3
   3   5  -2 212.099 17.3833   1
  -3   5   2 195.186 21.0988   1
  -3   5   2 212.156 22.0073   5
  -3   5   2 233.957 19.5921   2
  -3   5   2 203.823 21.5302   1
  -2  -5   2 806.115 57.7188   4
   2  -5  -2 783.430 58.0454   1
   2  -5  -2 772.146 55.8688   2
   2  -5  -2 760.963 52.6520   4
  -2  -5   2 721.667 55.6692   1
  -2  -5   2 753.050 53.9712   3
  -2   5   2 859.935 59.0967   1
   2   5  -2 829.459 56.4152   1
  -2   5   2 873.466 56.2242   2
  -2   5   2 844.115 58.6795   1
  -2   5   2 869.702 57.3980   5
   2   5  -2 847.150 54.1691   3
  -1  -5   2 256.225 20.2753   3
  -1  -5   2 245.632 21.9644   1
   1  -5  -2 262.444 21.2176   2
   1  -5  -2 246.497 23.0829   3
   1  -5  -2 264.032 20.2105   4
   1  -5  -2 271.363 23.9252   1
  -1  -5   2 268.169 22.5422   4
  -1  -5   2 291.291 20.1769   5
   1  -5  -2 232.723 21.0309   5
  -1   5   2 306.065 24.2250   1
   1   5  -2 306.620 23.0098   1
   1   5  -2 233.572 20.8273   5
  -1   5   2 307.225 21.1806   5
   1   5  -2 280.266 19.7510   3
  -1   5   2 274.778 24.1815   1
   0  -5  -2 1203.00 83.0413   3
   0  -5   2 1249.17 81.8216   5
   0  -5  -2 1174.50 83.4387   1
   0  -5  -2 1226.10 82.6333   4
   0  -5  -2 1253.51 83.7657   2
   0  -5   2 1235.89 83.8317   1
   0  -5   2 1121.64 82.1767   4
   0  -5  -2 1180.72 84.0052   1
   0  -5  -2 1098.29 81.1354   5
   0   5  -2 1280.05 81.6607   5
   0   5  -2 1228.11 84.2943   1
   0   5   2 1278.22 84.2699   1
   0   5   2 1310.80 80.8851   5
   0   5  -2 1310.76 82.3276   3
   0   5   2 1242.92 82.4525   3
   0   5  -2 1234.94 82.5934   4
   1  -5   2 123.148 12.2248   2
  -1  -5  -2 124.200 12.9982   3
  -1  -5  -2 143.400 15.0775   1
   1  -5   2 136.598 16.4671   1
   1  -5   2 117.177 12.2193   4
  -1  -5  -2 118.775 14.6310   4
  -1  -5  -2 140.025 14.0840   1
  -1  -5  -2 130.788 11.0383   5
   1   5   2 175.415 15.1696   1
  -1   5  -2 165.122 17.2270   1
  -1   5  -2 166.123 16.6626   1
   1   5   2 161.255 13.0862   3
  -1   5  -2 168.720 12.8414   4
  -1   5  -2 169.033 13.7975   5
   2  -5   2 143.569 13.2915   2
  -2  -5  -2 163.583 12.9106   5
  -2  -5  -2 141.683 13.8685   3
   2  -5   2 122.460 11.8730   4
  -2  -5  -2 142.089 16.9221   4
  -2  -5  -2 121.725 14.6751   1
   2  -5   2 158.238 17.7621   1
   2   5   2 181.126 14.7396   1
  -2   5  -2 181.683 17.9870   1
  -2   5  -2 176.461 18.2645   1
  -2   5  -2 168.761 16.3810   5
  -2   5  -2 187.707 12.3591   4
   2   5   2 163.997 14.5520   3
  -3  -5  -2 97.1469 11.4829   3
   3  -5   2 86.3898 13.0138   2
  -3  -5  -2 110.641 16.2539   4
  -3   5  -2 102.702 17.5098   5
  -3   5  -2 93.4650 15.4091   1
  -3   5  -2 95.2899 15.2392   1
  -4  -5  -2 234.781 30.0861   2
  -4  -5  -2 289.165 24.0527   3
  -4  -5  -2 299.544 27.9792   4
  -4   5  -2 313.988 27.6660   1
  -4   5  -2 290.569 29.5936   5
  -5  -5  -2 112.925 20.8766   2
  -5  -5  -2 106.585 21.4922   5
  -5  -5  -2 88.6329 16.7758   4
  -5   5  -2 78.1540 14.1425   1
  -5   5  -2 54.8487 18.6718   5
  -5  -6   2 64.4700 14.7922   4
  -5   6   2 27.7209 25.8488   5
  -5   6   2 26.6440 13.4286   1
  -4  -6   2 12.8329 12.1670   2
  -4  -6   2 4.49264 9.69332   4
  -4   6   2 3.30702 9.56573   1
  -4   6   2 5.25580 12.5419   5
  -4   6   2 -0.5733 9.97635   2
  -3  -6   2 155.422 13.4258   3
  -3  -6   2 127.421 20.2384   2
  -3  -6   2 145.864 19.7194   4
   3  -6  -2 143.340 19.3502   1
  -3   6   2 195.643 21.5870   5
  -3   6   2 175.920 17.9133   2
  -3   6   2 128.936 19.7005   1
  -2  -6   2 91.8310 10.3910   3
  -2  -6   2 104.004 15.2603   4
   2  -6  -2 86.2479 8.56881   4
   2  -6  -2 94.2396 15.6211   1
  -2  -6   2 79.1422 12.4149   1
  -2   6   2 106.319 14.2601   5
   2   6  -2 110.630 10.0739   3
   2   6  -2 118.734 13.3598   1
  -2   6   2 137.266 17.2816   1
  -1  -6   2 552.363 38.7775   3
   1  -6  -2 563.617 42.5016   1
   1  -6  -2 523.733 41.0705   3
  -1  -6   2 556.578 40.5392   4
  -1  -6   2 555.966 40.7834   1
   1  -6  -2 566.965 38.4782   4
  -1   6   2 563.093 38.4785   5
  -1   6   2 561.835 42.7002   1
   1   6  -2 462.373 38.6047   5
   1   6  -2 550.089 37.8564   3
   0  -6  -2 204.969 17.1177   5
   0  -6   2 216.518 18.8253   4
   0  -6  -2 221.944 19.0945   4
   0  -6  -2 210.749 19.9516   1
   0  -6  -2 219.185 20.0291   3
   0  -6  -2 239.826 21.5538   1
   0   6  -2 224.818 18.4728   5
   0   6  -2 190.845 18.8434   3
   0   6   2 214.354 16.9953   5
   0   6   2 190.401 20.7621   1
   0   6  -2 240.353 21.4805   1
  -1  -6  -2 409.487 27.1145   5
  -1  -6  -2 374.705 30.1107   1
  -1  -6  -2 410.157 31.3159   1
   1  -6   2 380.504 28.3518   4
  -1  -6  -2 395.566 31.1912   4
  -1  -6  -2 372.818 29.3078   3
   1  -6   2 402.862 28.5810   2
   1   6   2 371.185 30.6624   1
  -1   6  -2 364.420 32.5910   1
  -1   6  -2 381.005 28.8124   5
  -1   6  -2 361.999 28.2984   4
  -2  -6  -2 42.6151 6.64868   5
   2  -6   2 42.1939 6.65710   4
   2  -6   2 35.9896 6.86361   2
  -2  -6  -2 63.5548 9.33064   3
  -2  -6  -2 44.8527 11.4232   4
  -2   6  -2 75.6926 14.0546   1
   2   6   2 58.9868 9.68401   1
  -2   6  -2 40.9122 10.8845   5
  -3  -6  -2 238.068 20.0800   3
  -3  -6  -2 208.835 24.3590   4
  -3   6  -2 258.089 25.5090   1
  -3   6  -2 213.907 23.2823   5
  -4  -6  -2 61.8546 14.4498   4
  -4  -6  -2 52.3657 16.5105   2
  -4  -6  -2 54.0887 13.0638   3
  -4   6  -2 40.2753 12.6319   1
  -4   6  -2 43.7318 16.7290   5
  -4  -7   2 40.0158 15.0442   2
  -4  -7   2 68.5117 15.3729   4
  -4   7   2 42.4635 16.6477   5
  -4   7   2 55.4876 14.1862   1
  -3  -7   2 58.1656 15.4304   2
   3  -7  -2 80.1284 16.2250   1
  -3  -7   2 86.8713 15.7739   4
  -3   7   2 84.0562 16.2693   1
  -3   7   2 79.9850 15.3731   5
  -2  -7   2 57.2659 8.69567   3
  -2  -7   2 68.6486 13.4167   4
   2  -7  -2 45.9877 11.9936   1
   2  -7  -2 39.5724 6.40394   4
   2   7  -2 50.1426 11.1286   1
  -2   7   2 37.8970 10.6063   5
  -2   7   2 68.8557 14.4087   1
   1  -7  -2 29.6895 7.45005   4
  -1  -7   2 33.9912 8.90264   4
   1  -7  -2 34.6738 11.8290   1
   1  -7  -2 26.4204 10.7955   3
  -1  -7   2 31.8808 8.21778   3
  -1  -7   2 42.5018 9.51555   1
   1   7  -2 45.2085 10.7496   1
  -1   7   2 39.9355 12.2895   1
  -1   7   2 39.6086 8.71047   5
   1   7  -2 49.1004 9.44545   5
   0  -7  -2 250.053 23.4715   3
   0  -7  -2 270.982 25.5276   1
   0  -7  -2 237.402 20.5602   5
   0  -7  -2 247.399 22.5967   4
   0  -7   2 239.210 22.1214   4
   0   7  -2 272.788 25.5877   1
   0   7   2 271.123 25.7362   1
   0   7   2 259.519 20.5873   5
   0   7  -2 290.559 22.3116   5
   1  -7   2 64.9984 9.84418   4
  -1  -7  -2 51.3227 7.74904   5
  -1  -7  -2 66.1574 10.8902   3
  -1  -7  -2 68.2751 12.4009   1
  -1  -7  -2 54.9205 10.9689   4
  -1   7  -2 66.4320 11.1874   5
  -1   7  -2 71.7810 15.0114   1
   1   7   2 50.3753 10.8835   1
  -2  -7  -2 126.819 14.5120   3
   2  -7   2 112.341 11.4851   4
  -2  -7  -2 124.161 17.8831   4
  -2   7  -2 155.711 21.4752   1
  -2   7  -2 131.336 16.9638   5
  -3  -7  -2 44.3233 9.31340   3
  -3  -7  -2 51.1897 14.0195   4
  -3   7  -2 51.6903 13.9965   1
  -3   7  -2 29.2261 12.1793   5
  -4  -7  -2 33.9951 16.1298   2
  -4  -7  -2 24.7450 13.2123   4
  -4   7  -2 21.5590 14.2801   5
  -4   7  -2 32.5817 12.8635   1
  -4   8   2 27.7345 15.7627   5
  -3  -8   2 81.9166 17.6559   2
  -3  -8   2 50.2956 14.3595   4
   3  -8  -2 57.0373 14.9695   1
  -3   8   2 50.9015 15.3578   1
  -3   8   2 54.9402 14.3643   5
  -2  -8   2 13.8805 10.3173   4
   2  -8  -2 25.7497 12.1890   1
  -2  -8   2 17.6627 7.09326   3
  -2   8   2 8.98709 9.79453   5
  -2   8   2 30.1348 13.0722   1
  -1  -8   2 160.744 19.6000   4
   1  -8  -2 179.385 17.3492   4
   1  -8  -2 197.507 23.2054   1
   1   8  -2 159.266 18.6740   5
   1   8  -2 186.169 21.6114   1
  -1   8   2 202.524 17.8819   5
  -1   8   2 221.269 25.0164   1
   0  -8   2 50.1930 10.6645   4
   0  -8  -2 49.2779 10.9066   4
   0  -8  -2 79.7889 14.8767   1
   0  -8  -2 50.5657 12.2456   3
   0   8  -2 58.3194 14.3194   1
   0   8  -2 57.4751 11.4009   5
   0   8   2 57.3039 9.84632   5
   0   8   2 44.0202 13.0891   1
  -1  -8  -2 313.105 29.2720   1
   1  -8   2 296.627 24.7500   4
  -1  -8  -2 309.052 27.8279   4
  -1  -8  -2 297.584 26.9687   3
  -1   8  -2 286.522 25.8017   5
  -1   8  -2 354.511 32.1168   1
  -2  -8  -2 39.4561 9.79214   3
  -2  -8  -2 41.9715 12.9906   4
  -2   8  -2 49.7127 15.7167   1
  -2   8  -2 38.9069 12.5174   5
  -3  -8  -2 55.4712 14.7098   4
  -3   8  -2 23.7061 12.6170   5
  -3   8  -2 46.2765 14.4591   1
  -3  -9   2 11.2174 14.3160   2
  -3  -9   2 21.2608 12.7556   4
  -3   9   2 -8.1376 11.9643   5
  -3   9   2 20.4065 15.2339   1
  -2  -9   2 69.4010 14.4707   4
   2  -9  -2 91.8793 19.0192   1
  -2   9   2 65.3355 13.5714   5
  -2   9   2 79.4765 19.2614   1
   1  -9  -2 73.6714 11.8221   4
  -1  -9   2 70.6316 14.1929   4
   1  -9  -2 94.3087 18.2556   1
   1   9  -2 88.4853 18.6394   1
   1   9  -2 109.439 15.3752   5
  -1   9   2 77.5746 13.0728   5
  -1   9   2 102.545 19.4806   1
   0  -9  -2 211.517 23.1679   3
   0  -9   2 232.758 21.9588   4
   0  -9  -2 202.127 25.1188   1
   0  -9  -2 182.395 21.1638   4
   0   9   2 200.126 19.2190   5
   0   9   2 185.661 25.4266   1
   0   9  -2 257.794 27.3218   1
   0   9  -2 185.959 20.5908   5
   1  -9   2 1.24495 7.09560   4
  -1  -9  -2 14.2689 9.34616   3
  -1  -9  -2 20.3779 10.4687   4
  -1   9  -2 4.71909 10.9489   5
  -1   9  -2 13.8427 13.3335   1
  -2  -9  -2 94.5001 14.7520   3
  -2  -9  -2 103.305 17.2303   4
  -2   9  -2 70.6702 15.3413   5
  -2   9  -2 89.3656 19.5993   1
  -3  -9  -2 79.1499 17.5790   4
  -3   9  -2 64.5458 17.6886   1
  -3   9  -2 48.1190 16.1493   5
  -2 -10   2 14.4607 11.2782   4
   2 -10  -2 6.95075 12.9365   1
  -2  10   2 -29.244 11.2011   5
  -2  10   2 1.68310 13.9561   1
   1 -10  -2 83.9529 19.5283   1
  -1 -10   2 80.3209 15.3072   4
  -1  10   2 36.5477 15.8587   1
   0 -10  -2 21.1543 10.0390   4
   0 -10  -2 -2.7599 11.6840   1
   0 -10   2 16.0000 9.69063   4
   0  10  -2 28.4739 11.1921   5
   0  10  -2 26.4626 13.8570   1
   0  10   2 14.7198 19.3098   1
  -1 -10  -2 72.4716 14.9580   3
  -1 -10  -2 91.4891 15.9143   4
  -1  10  -2 113.564 21.2598   1
  -1  10  -2 77.7775 15.3436   5
  -2 -10  -2 28.3437 13.3549   4
  -2  10  -2 -15.358 12.4462   5
  -2  10  -2 8.07125 13.3867   1
  -6   0   3 2.61843 12.1260   2
  -6   0   3 -2.8774 13.9897   5
  -5   0   3 4.86589 11.2555   5
  -5   0   3 -0.8736 3.97947   1
  -5   0   3 9.80320 10.2592   2
  -5   0   3 -7.8149 5.43952   4
  -4   0   3 213.119 17.4522   1
  -4   0   3 194.431 21.4882   2
   4   0  -3 221.196 16.8346   1
  -4   0   3 225.453 18.3192   4
   3   0  -3 249.963 18.5682   4
  -3   0   3 222.485 17.9471   1
  -3   0   3 216.206 18.0009   4
  -3   0   3 226.047 20.6424   2
   3   0  -3 238.407 17.7320   1
  -2   0   3 2969.58 186.714   3
  -2   0   3 2848.73 186.245   4
  -2   0   3 2763.61 187.873   2
  -2   0   3 2863.83 186.689   1
   2   0  -3 2795.30 186.551   1
   2   0  -3 2936.27 186.449   4
   1   0  -3 1388.25 93.7704   1
   1   0  -3 1465.83 93.2857   4
   1   0  -3 1371.17 93.0507   3
  -1   0   3 1408.49 94.1500   2
  -1   0   3 1478.36 93.8795   1
  -1   0   3 1466.54 93.2518   4
   1   0  -3 1414.87 94.1499   2
  -1   0   3 1432.36 93.0070   3
   0   0   3 109.339 8.14897   3
   0   0   3 106.851 8.03606   2
   0   0   3 96.3173 8.16546   4
   0   0   3 109.416 7.52429   5
   0   0   3 101.729 8.57886   1
   0   0  -3 104.238 8.26909   4
   0   0  -3 109.820 8.04708   2
   0   0  -3 100.507 8.55037   1
   0   0  -3 100.526 8.02007   3
   0   0  -3 98.0159 7.59957   5
  -1   0  -3 118.488 9.51437   1
  -1   0  -3 124.826 10.2983   5
   1   0   3 131.749 9.42182   1
   1   0   3 115.802 10.4889   5
  -2   0  -3 1803.67 118.744   2
  -2   0  -3 1776.80 117.044   1
  -2   0  -3 1856.35 117.179   1
  -2   0  -3 1767.31 119.644   5
   2   0   3 1800.20 116.746   1
  -3   0  -3 5.85344 2.19468   1
  -3   0  -3 4.93820 2.24079   1
  -3   0  -3 -3.0863 6.52010   5
  -3   0  -3 9.45264 5.53267   2
  -4   0  -3 307.103 28.0715   5
  -4   0  -3 307.880 26.2260   2
  -4   0  -3 305.542 24.8018   4
  -5   0  -3 113.687 16.6103   2
  -5   0  -3 110.047 14.9734   4
  -5   0  -3 114.525 18.4969   5
  -6  -1   3 4.40807 11.9520   2
  -6  -1   3 -8.3878 13.1378   5
  -6   1   3 -4.8043 10.3208   2
  -5  -1   3 60.7658 6.76850   1
  -5  -1   3 54.8074 13.8468   2
  -5  -1   3 36.0851 14.5419   5
  -5  -1   3 59.9399 11.0060   4
  -5   1   3 54.9068 13.1437   2
  -5   1   3 53.8230 8.81992   1
  -5   1   3 56.3901 16.9238   5
  -4  -1   3 88.9390 14.5277   2
   4  -1  -3 86.7193 9.92979   1
  -4  -1   3 89.2770 11.5413   4
  -4  -1   3 71.5283 8.57708   1
  -4   1   3 83.2465 16.9119   5
  -4   1   3 68.2052 8.96297   4
  -4   1   3 86.7106 10.6721   1
   4   1  -3 80.7620 7.62329   1
  -4   1   3 74.3216 10.3005   1
  -4   1   3 84.6629 13.7530   2
   3  -1  -3 717.657 51.1387   2
   3  -1  -3 575.093 47.9083   1
  -3  -1   3 714.121 47.7794   1
  -3  -1   3 729.384 51.3678   2
  -3  -1   3 707.026 48.8619   4
  -3   1   3 677.378 51.6985   5
  -3   1   3 709.879 48.8509   1
  -3   1   3 704.994 47.2548   4
   3   1  -3 748.554 49.2617   4
   3   1  -3 710.242 47.5146   1
  -3   1   3 757.032 49.8529   3
  -3   1   3 720.177 50.3475   2
   2  -1  -3 566.381 37.7476   4
  -2  -1   3 522.194 40.1995   2
   2  -1  -3 565.181 40.0734   2
   2  -1  -3 547.016 39.0611   1
  -2  -1   3 543.928 38.8226   4
  -2  -1   3 581.110 38.5243   1
  -2   1   3 542.059 39.0225   3
  -2   1   3 583.270 39.8232   2
   2   1  -3 577.505 40.6904   2
   2   1  -3 578.475 39.2009   4
  -2   1   3 571.327 37.5688   4
  -2   1   3 570.799 39.3322   1
  -1  -1   3 425.228 31.2220   2
  -1  -1   3 433.853 30.5272   1
  -1  -1   3 426.618 30.4890   4
   1  -1  -3 419.518 30.8309   2
   1  -1  -3 434.512 29.4937   4
   1  -1  -3 435.169 30.5755   3
  -1  -1   3 428.333 28.8705   3
   1  -1  -3 422.171 30.9487   1
   1   1  -3 454.638 30.5474   4
  -1   1   3 470.957 29.5725   4
   1   1  -3 458.989 31.4615   2
  -1   1   3 472.696 30.4732   3
   1   1  -3 469.076 30.6329   1
  -1   1   3 455.341 31.1207   1
  -1   1   3 442.835 30.7293   2
   0  -1   3 783.909 52.9199   1
   0  -1  -3 771.904 52.4711   3
   0  -1  -3 837.572 52.6456   2
   0  -1   3 766.546 52.4166   4
   0  -1  -3 747.281 52.8957   1
   0  -1   3 884.546 52.1943   5
   0  -1   3 764.895 52.1933   2
   0   1  -3 779.228 52.9346   1
   0   1   3 782.009 52.5836   2
   0   1  -3 786.432 52.2487   2
   0   1  -3 801.312 52.1768   5
   0   1  -3 840.949 52.5517   4
   0   1   3 756.479 52.8818   1
   0   1   3 812.106 52.5206   3
  -1  -1  -3 2688.94 178.646   1
   1  -1   3 2363.98 179.386   5
  -1  -1  -3 2519.93 178.823   5
   1  -1   3 2516.15 179.071   1
  -1  -1  -3 2634.89 179.382   3
  -1   1  -3 2888.41 179.366   1
  -1   1  -3 2869.47 178.028   2
   1   1   3 2847.62 179.602   3
  -1   1  -3 2999.37 178.875   4
  -1   1  -3 3019.75 179.649   5
   1   1   3 2972.26 178.605   1
  -2  -1  -3 128.233 13.0861   5
   2  -1   3 120.828 10.8803   1
  -2  -1  -3 138.010 12.8276   3
   2  -1   3 109.616 13.0502   5
  -2   1  -3 151.110 11.5714   1
  -2   1  -3 149.787 13.7795   5
  -2   1  -3 147.989 11.4407   1
  -2   1  -3 155.003 11.4860   2
  -3  -1  -3 903.857 64.1752   3
  -3  -1  -3 894.282 65.0591   5
  -3  -1  -3 927.284 64.8456   2
  -3  -1  -3 925.755 63.8933   4
  -3   1  -3 908.061 61.8841   1
  -3   1  -3 948.937 63.1973   2
  -3   1  -3 959.975 66.0873   5
  -3   1  -3 944.644 62.0943   1
  -4  -1  -3 22.5192 10.4438   5
  -4  -1  -3 37.8577 9.99794   2
  -4  -1  -3 28.3675 8.47645   4
  -4  -1  -3 28.3490 9.04868   3
  -4   1  -3 31.3103 5.46193   1
  -4   1  -3 41.0851 7.60367   4
  -4   1  -3 29.3681 7.79129   2
  -4   1  -3 32.1731 5.49621   1
  -4   1  -3 19.8468 11.2822   5
  -5  -1  -3 60.5223 15.6081   5
  -5  -1  -3 77.1443 14.1043   3
  -5  -1  -3 57.5906 11.9180   4
  -5  -1  -3 78.9722 14.6124   2
  -5   1  -3 72.5422 12.6915   2
  -5   1  -3 67.7188 16.7379   5
  -5  -2   3 6.60174 10.1614   2
  -5  -2   3 12.2904 7.55196   3
  -5  -2   3 12.2189 8.37256   4
  -5   2   3 17.8163 7.23006   1
  -5   2   3 20.1141 10.4371   2
  -5   2   3 5.27542 12.2114   5
  -4  -2   3 247.227 20.2725   3
  -4  -2   3 258.341 18.3103   1
  -4  -2   3 243.855 24.4126   2
  -4  -2   3 268.112 21.8386   4
  -4   2   3 231.973 20.8386   1
  -4   2   3 233.094 25.6187   5
  -4   2   3 206.460 22.1802   2
   4   2  -3 253.714 16.8757   1
  -4   2   3 225.063 17.2938   4
  -4   2   3 228.002 20.7908   1
   3  -2  -3 98.1039 12.7156   2
  -3  -2   3 87.2177 11.9217   4
  -3  -2   3 109.750 15.1725   2
  -3  -2   3 98.7749 9.91385   1
  -3  -2   3 93.3037 10.1837   3
   3  -2  -3 97.0938 11.8275   1
  -3   2   3 107.493 8.22510   4
  -3   2   3 111.329 15.4392   5
   3   2  -3 111.938 9.72891   1
  -3   2   3 122.783 12.7867   1
  -3   2   3 121.389 12.5993   1
  -3   2   3 112.605 12.6385   2
  -2  -2   3 1709.14 108.700   3
   2  -2  -3 1735.75 108.319   4
  -2  -2   3 1752.35 111.012   4
  -2  -2   3 1722.68 112.420   2
   2  -2  -3 1744.94 111.242   2
   2  -2  -3 1715.56 111.256   1
  -2  -2   3 1724.28 110.028   1
  -2   2   3 1549.77 112.033   5
  -2   2   3 1576.85 110.536   2
  -2   2   3 1651.39 111.236   1
   2   2  -3 1596.59 110.758   4
  -2   2   3 1549.77 110.709   3
   1  -2  -3 1800.72 120.758   2
   1  -2  -3 1794.62 119.349   4
  -1  -2   3 1752.42 120.647   1
  -1  -2   3 1683.25 120.640   4
   1  -2  -3 1780.83 121.002   3
  -1  -2   3 1796.02 121.537   2
  -1  -2   3 1674.65 120.254   5
   1  -2  -3 1646.85 121.136   1
  -1   2   3 1978.15 120.801   2
  -1   2   3 1910.87 121.128   5
   1   2  -3 1987.17 121.069   4
  -1   2   3 2019.45 120.981   3
  -1   2   3 2008.12 121.675   1
   1   2  -3 1942.63 120.935   1
   0  -2   3 3821.23 246.269   1
   0  -2   3 4296.00 245.306   5
   0  -2  -3 3944.27 245.866   2
   0  -2  -3 3646.36 246.257   1
   0  -2  -3 3718.22 245.722   3
   0  -2   3 3723.33 245.566   4
   0  -2   3 3807.57 245.463   2
   0  -2  -3 3526.39 244.568   5
   0   2   3 3649.09 246.168   1
   0   2  -3 3844.10 245.638   4
   0   2   3 3735.54 245.649   3
   0   2  -3 4034.14 245.283   5
   0   2   3 3722.23 244.387   5
   0   2  -3 3542.76 246.149   1
   1  -2   3 543.153 39.7610   1
  -1  -2  -3 588.428 39.2827   1
  -1  -2  -3 538.208 39.4276   3
   1  -2   3 513.815 39.7338   5
   1  -2   3 589.231 38.8066   4
  -1   2  -3 610.817 39.7814   5
   1   2   3 587.358 39.2052   1
  -1   2  -3 590.153 40.2622   1
  -1   2  -3 597.173 38.7160   4
   1   2   3 614.343 39.7536   3
  -1   2  -3 600.467 40.1910   1
   2  -2   3 1941.78 131.631   1
   2  -2   3 1677.17 132.810   5
  -2  -2  -3 1954.26 132.063   3
  -2  -2  -3 1954.30 130.189   1
  -2   2  -3 2102.48 130.412   2
  -2   2  -3 2048.26 132.128   1
  -2   2  -3 1988.15 132.076   1
  -2   2  -3 2054.68 133.303   5
   2   2   3 2053.93 129.699   1
   2   2   3 2143.73 129.787   1
  -2   2  -3 2095.21 130.652   4
  -3  -2  -3 233.302 19.8243   4
  -3  -2  -3 248.311 19.6333   3
  -3  -2  -3 200.079 19.6662   5
  -3   2  -3 211.722 21.1397   5
  -3   2  -3 207.702 17.9872   1
  -3   2  -3 242.893 16.8492   4
  -3   2  -3 215.600 18.0771   1
  -3   2  -3 207.483 17.2810   2
  -4  -2  -3 155.083 18.9710   5
  -4  -2  -3 187.096 17.9203   3
  -4  -2  -3 173.538 19.7942   2
  -4  -2  -3 177.204 18.5250   4
  -4   2  -3 157.525 14.9365   1
  -4   2  -3 165.615 20.7523   5
  -4   2  -3 151.010 14.2775   4
  -4   2  -3 168.039 15.9953   2
  -4   2  -3 156.574 17.0201   1
  -5  -2  -3 56.5722 14.1524   5
  -5  -2  -3 36.4253 11.2555   4
  -5  -2  -3 69.2824 14.7195   2
  -5  -2  -3 50.6002 11.9254   3
  -5   2  -3 60.4252 9.01290   1
  -5   2  -3 41.2059 15.7220   5
  -5  -3   3 80.5759 13.7750   4
  -5  -3   3 96.2255 18.9412   2
  -5   3   3 60.1312 17.0996   5
  -5   3   3 84.0582 13.6744   1
  -5   3   3 72.2603 13.4024   2
  -4  -3   3 33.6090 9.78679   4
  -4  -3   3 38.9969 7.14029   3
  -4  -3   3 45.0193 12.2964   2
  -4  -3   3 40.8924 6.61794   1
  -4   3   3 20.4156 8.77509   2
  -4   3   3 21.5802 8.10796   1
  -4   3   3 18.2792 12.0795   5
  -3  -3   3 335.730 23.1142   3
   3  -3  -3 331.317 26.4700   1
  -3  -3   3 350.545 26.9718   4
  -3  -3   3 321.424 23.9618   1
  -3  -3   3 316.660 28.7130   2
  -3   3   3 323.514 25.7054   2
  -3   3   3 309.157 28.4786   5
   3   3  -3 317.988 23.6749   1
  -3   3   3 313.447 26.2766   1
  -3   3   3 311.167 26.4514   1
  -2  -3   3 949.404 67.2009   2
  -2  -3   3 863.657 64.5619   5
  -2  -3   3 983.090 64.9060   1
  -2  -3   3 972.553 62.7448   3
   2  -3  -3 929.358 66.3511   1
  -2  -3   3 876.635 65.7401   4
   2  -3  -3 936.975 65.4338   2
  -2   3   3 1018.72 66.6260   1
   2   3  -3 1021.08 67.2228   4
  -2   3   3 982.461 66.3145   3
   2   3  -3 1035.94 64.9852   1
  -2   3   3 976.879 66.4559   1
  -2   3   3 981.459 65.1785   2
  -2   3   3 925.713 66.5550   5
   1  -3  -3 1021.90 59.6314   3
   1  -3  -3 900.794 58.5273   5
  -1  -3   3 992.149 59.0362   4
   1  -3  -3 1036.48 60.3325   1
   1  -3  -3 1001.86 58.6335   2
  -1  -3   3 1019.69 59.0177   1
  -1   3   3 797.792 58.2186   2
   1   3  -3 762.756 58.4934   4
  -1   3   3 722.457 58.1012   3
  -1   3   3 796.595 59.2659   1
   1   3  -3 751.290 56.2366   3
  -1   3   3 784.435 59.1967   1
   1   3  -3 730.581 58.2593   1
   0  -3  -3 123.551 11.6499   3
   0  -3   3 111.849 12.0539   1
   0  -3   3 137.842 10.6080   5
   0  -3  -3 130.932 11.6487   2
   0  -3   3 118.691 11.2679   4
   0  -3  -3 122.386 9.72329   5
   0  -3  -3 121.255 12.4913   1
   0   3  -3 107.196 12.0219   1
   0   3   3 133.296 12.7741   1
   0   3   3 133.801 9.34010   5
   0   3   3 129.963 11.2682   3
   0   3   3 136.526 12.6329   1
   0   3  -3 141.188 11.4567   4
   0   3  -3 136.265 12.6702   1
   0   3  -3 129.337 10.6481   5
   0   3  -3 122.195 10.8413   3
   1  -3   3 755.041 49.6100   4
  -1  -3  -3 727.408 50.6883   1
  -1  -3  -3 781.511 48.8180   5
   1  -3   3 761.292 48.8597   2
   1  -3   3 703.493 50.9528   5
   1  -3   3 704.637 51.0906   1
  -1  -3  -3 795.846 50.5636   3
  -1   3  -3 739.424 49.6154   4
   1   3   3 738.048 50.3976   1
  -1   3  -3 739.859 51.6092   1
  -1   3  -3 753.213 51.6768   1
  -1   3  -3 757.409 50.5294   5
   1   3   3 725.389 50.4380   3
   1   3   3 703.779 50.4845   1
  -2  -3  -3 474.534 36.3553   3
  -2  -3  -3 483.974 37.7140   4
   2  -3   3 505.591 34.8041   2
  -2  -3  -3 491.839 35.3965   1
  -2   3  -3 535.724 34.8206   4
  -2   3  -3 531.162 38.2829   5
   2   3   3 538.092 37.0072   3
  -2   3  -3 536.932 34.4917   2
  -2   3  -3 510.616 37.6459   1
   2   3   3 518.776 35.1084   1
   2   3   3 527.712 35.3216   1
  -2   3  -3 549.984 37.8452   1
  -3  -3  -3 552.772 39.1513   3
  -3  -3  -3 542.776 40.7138   4
  -3   3  -3 528.995 39.4013   1
  -3   3  -3 549.499 39.6372   1
  -3   3  -3 512.553 36.1783   4
  -3   3  -3 528.519 41.9649   5
  -3   3  -3 568.570 37.0989   2
  -4  -3  -3 215.788 22.7318   5
  -4  -3  -3 253.683 25.4067   2
  -4  -3  -3 248.414 23.1027   4
  -4  -3  -3 260.711 21.8518   3
  -4   3  -3 224.048 20.8500   1
  -4   3  -3 233.200 25.4914   5
  -4   3  -3 229.551 19.4471   2
  -5  -3  -3 15.6070 11.0912   5
  -5  -3  -3 27.0854 10.0193   3
  -5  -3  -3 32.1798 12.2794   2
  -5  -3  -3 9.10996 9.83205   4
  -5   3  -3 15.9404 6.88389   1
  -5   3  -3 3.90293 13.8197   5
  -5  -4   3 72.9717 14.4475   4
  -5  -4   3 75.2414 16.7966   2
  -5   4   3 82.8122 18.8717   5
  -5   4   3 72.4263 14.0673   2
  -5   4   3 66.4052 13.3014   1
  -4  -4   3 123.308 21.0533   2
  -4  -4   3 128.017 12.1424   3
  -4  -4   3 122.548 17.2692   4
  -4   4   3 141.420 16.8335   2
  -4   4   3 137.221 20.5320   5
  -4   4   3 146.582 17.7799   1
  -3  -4   3 90.9559 15.4086   2
   3  -4  -3 90.6679 13.8530   1
  -3  -4   3 88.7146 8.18239   3
  -3  -4   3 93.0698 13.9722   4
  -3  -4   3 88.8460 10.1358   1
  -3   4   3 78.5045 12.4784   2
  -3   4   3 85.8253 13.1620   1
   3   4  -3 94.7688 10.0902   1
  -3   4   3 66.9125 12.0009   1
  -3   4   3 96.3185 15.8910   5
  -2  -4   3 396.526 32.7139   2
  -2  -4   3 364.266 29.4754   1
   2  -4  -3 404.117 31.9463   1
   2  -4  -3 368.869 30.0018   2
  -2  -4   3 395.795 27.2500   3
  -2  -4   3 377.426 31.0460   4
  -2  -4   3 410.268 30.8575   5
  -2   4   3 433.358 32.1708   1
  -2   4   3 393.562 31.0267   5
   2   4  -3 448.212 30.2550   1
  -2   4   3 419.874 32.0877   1
  -2   4   3 431.594 30.2153   2
   1  -4  -3 313.011 24.2975   2
  -1  -4   3 366.996 23.6563   5
  -1  -4   3 316.582 24.9673   4
  -1  -4   3 315.736 22.7736   3
  -1  -4   3 310.652 24.8765   1
   1  -4  -3 330.869 26.3827   1
   1  -4  -3 299.677 24.1269   5
   1  -4  -3 330.001 25.4976   3
   1  -4  -3 324.826 23.0561   4
  -1   4   3 343.374 26.5056   1
   1   4  -3 256.385 23.5559   5
   1   4  -3 326.299 25.1882   4
  -1   4   3 312.417 23.9479   5
  -1   4   3 341.939 24.8995   2
   1   4  -3 345.486 25.2030   1
  -1   4   3 341.312 26.5500   1
   1   4  -3 335.863 22.3948   3
   1   4  -3 327.640 25.2356   1
  -1   4   3 329.451 24.8235   3
   0  -4  -3 1459.80 90.0607   2
   0  -4   3 1371.85 89.5382   4
   0  -4  -3 1394.95 89.7999   4
   0  -4  -3 1360.30 90.0340   3
   0  -4  -3 1404.02 91.1603   1
   0  -4  -3 1292.81 88.2164   5
   0  -4   3 1465.63 89.0479   5
   0  -4   3 1353.88 90.6137   1
   0   4   3 1332.34 90.7891   1
   0   4   3 1274.44 89.4114   3
   0   4   3 1399.00 87.7358   5
   0   4  -3 1346.61 88.8366   5
   0   4  -3 1276.84 90.8130   1
   0   4  -3 1284.92 90.7057   1
   0   4  -3 1250.47 89.1039   3
   0   4   3 1292.48 90.7856   1
   0   4  -3 1281.15 89.4389   4
  -1  -4  -3 182.039 16.9815   1
  -1  -4  -3 170.652 16.9734   4
  -1  -4  -3 194.929 16.2156   3
   1  -4   3 187.410 15.3606   4
   1  -4   3 164.080 17.0833   1
   1  -4   3 193.699 14.7612   2
  -1  -4  -3 207.734 13.9498   5
   1  -4   3 177.546 16.4472   5
  -1   4  -3 199.632 17.9131   1
   1   4   3 206.158 17.0643   1
  -1   4  -3 207.493 18.5126   1
  -1   4  -3 204.640 17.4766   3
   1   4   3 212.310 16.2797   3
  -1   4  -3 213.265 16.3898   5
  -1   4  -3 216.684 15.5224   4
   1   4   3 205.194 16.8308   1
  -2  -4  -3 211.569 15.4713   5
   2  -4   3 221.905 15.2757   2
  -2  -4  -3 218.180 17.2697   3
  -2  -4  -3 240.052 17.0898   1
  -2  -4  -3 227.366 19.6408   4
  -2   4  -3 186.335 18.2220   5
  -2   4  -3 178.541 18.5071   1
  -2   4  -3 215.583 19.5206   1
  -2   4  -3 182.540 14.8057   4
   2   4   3 179.491 15.8045   1
   2   4   3 178.039 16.9407   3
   3  -4   3 243.710 18.1659   2
  -3  -4  -3 252.061 19.9905   3
  -3  -4  -3 238.240 22.9797   4
  -3   4  -3 237.458 21.7435   1
   3   4   3 229.310 16.5035   1
  -3   4  -3 221.007 21.7092   1
  -3   4  -3 231.048 17.7052   2
  -3   4  -3 247.267 23.4408   5
  -4  -4  -3 107.290 17.9045   2
  -4  -4  -3 98.1112 15.1950   5
  -4  -4  -3 109.345 13.9287   3
  -4  -4  -3 117.462 17.0258   4
  -4   4  -3 75.8503 17.6224   5
  -4   4  -3 81.2990 14.0966   1
  -5  -4  -3 18.1820 11.5779   4
  -5  -4  -3 17.8737 8.84275   3
  -5  -4  -3 17.5639 10.9250   5
  -5  -4  -3 29.6845 13.4569   2
  -5   4  -3 40.7079 17.2091   5
  -5   4  -3 23.3211 8.68944   1
  -5  -5   3 17.3433 12.7940   2
  -5  -5   3 33.5343 12.1535   4
  -5   5   3 8.53583 14.8552   5
  -5   5   3 10.3108 10.1329   1
  -4  -5   3 153.167 22.7055   2
  -4  -5   3 152.407 18.8727   4
  -4   5   3 80.2102 17.4312   5
  -4   5   3 90.9673 15.9998   2
  -4   5   3 131.767 18.2796   1
  -3  -5   3 186.226 21.5345   4
  -3  -5   3 181.850 23.9608   2
  -3  -5   3 172.388 17.9329   1
  -3  -5   3 191.624 15.7251   3
   3  -5  -3 199.350 21.6175   1
  -3   5   3 276.425 23.9827   1
  -3   5   3 261.661 23.0970   1
  -3   5   3 256.133 20.8130   2
  -3   5   3 266.593 24.3961   5
  -2  -5   3 285.643 22.6192   1
   2  -5  -3 257.762 24.8515   1
  -2  -5   3 264.973 23.3819   4
  -2  -5   3 280.668 19.6390   3
   2  -5  -3 274.979 18.6308   4
  -2   5   3 246.242 23.1609   5
  -2   5   3 253.826 24.4443   1
   2   5  -3 247.368 22.1202   1
   2   5  -3 274.946 19.4253   3
  -2   5   3 277.883 25.3511   1
  -2   5   3 277.115 22.7624   2
   1  -5  -3 261.817 22.8201   1
  -1  -5   3 259.404 18.7260   3
  -1  -5   3 267.314 21.0999   1
   1  -5  -3 249.206 20.1601   2
  -1  -5   3 290.040 18.8832   5
   1  -5  -3 285.065 18.9356   4
  -1  -5   3 260.818 20.9826   4
   1  -5  -3 270.059 21.5583   3
   1  -5  -3 218.298 19.4527   5
  -1   5   3 205.482 21.8427   1
   1   5  -3 199.671 17.3930   3
   1   5  -3 218.193 20.7077   1
  -1   5   3 184.360 18.4185   5
   0  -5   3 333.057 24.7380   4
   0  -5  -3 290.802 22.9081   5
   0  -5  -3 327.674 24.9439   4
   0  -5   3 307.898 25.7738   1
   0  -5  -3 324.456 26.7596   1
   0  -5  -3 322.503 25.0870   3
   0  -5   3 318.771 23.8794   5
   0   5  -3 315.628 23.8317   5
   0   5  -3 318.089 23.9584   3
   0   5   3 341.687 26.9194   1
   0   5  -3 324.389 24.7304   4
   0   5  -3 304.410 26.3733   1
   0   5   3 340.418 22.5325   5
  -1  -5  -3 802.225 51.6784   5
   1  -5   3 717.118 52.7841   4
  -1  -5  -3 753.417 54.9371   1
  -1  -5  -3 746.825 53.8828   3
  -1  -5  -3 722.782 54.9752   4
  -1   5  -3 835.188 56.7864   1
   1   5   3 792.888 53.8832   3
  -1   5  -3 814.108 56.4596   1
   1   5   3 755.019 54.7107   1
  -1   5  -3 814.716 53.3933   4
  -1   5  -3 835.909 53.9656   5
   2  -5   3 98.4154 9.42779   4
  -2  -5  -3 118.299 12.1311   1
  -2  -5  -3 93.1413 11.4784   3
  -2  -5  -3 109.855 13.7387   4
  -2  -5  -3 113.165 9.52321   5
   2  -5   3 108.479 9.84106   2
  -2   5  -3 99.6726 14.0106   5
  -2   5  -3 106.992 14.9290   1
  -2   5  -3 94.5878 14.0610   1
   2   5   3 85.0228 11.0188   1
  -2   5  -3 75.6531 9.05298   4
  -3  -5  -3 238.832 20.7627   3
  -3  -5  -3 219.668 19.5168   5
  -3  -5  -3 237.193 24.6708   4
  -3   5  -3 282.713 24.8981   1
  -3   5  -3 294.069 25.2640   5
  -3   5  -3 289.620 26.2564   1
  -4  -5  -3 15.9317 12.5091   2
  -4  -5  -3 18.3654 7.57612   3
  -4  -5  -3 25.7436 11.3605   4
  -4   5  -3 3.93236 11.8426   5
  -4   5  -3 11.6866 9.01395   1
  -5  -5  -3 11.1692 12.7135   2
  -5  -5  -3 26.7620 12.3862   4
  -5   5  -3 -4.8497 7.95817   1
  -5   5  -3 -5.2169 15.7509   5
  -5  -6   3 38.0363 12.6417   4
  -5   6   3 17.4546 16.7109   5
  -5   6   3 15.9944 13.3120   1
  -4  -6   3 50.6850 13.1397   4
  -4  -6   3 38.5609 16.2336   2
  -4   6   3 59.9470 12.8735   2
  -4   6   3 42.0860 14.6798   5
  -4   6   3 65.2198 14.4193   1
  -3  -6   3 135.365 20.9020   2
  -3  -6   3 137.578 17.4671   4
   3  -6  -3 128.613 18.1814   1
  -3  -6   3 128.045 11.4529   3
  -3   6   3 133.378 16.1260   2
  -3   6   3 123.968 19.5786   5
  -3   6   3 117.097 18.9465   1
  -2  -6   3 207.518 20.8986   4
  -2  -6   3 171.793 15.9491   3
  -2  -6   3 192.450 18.9758   1
   2  -6  -3 160.593 20.7957   1
   2  -6  -3 179.901 15.1072   4
  -2   6   3 229.657 23.3669   1
   2   6  -3 258.859 20.4452   1
  -2   6   3 234.231 20.1016   5
   2   6  -3 229.607 15.9549   3
  -1  -6   3 175.928 17.6345   4
  -1  -6   3 169.818 17.5794   1
   1  -6  -3 191.361 19.8769   1
   1  -6  -3 175.260 15.3469   4
   1  -6  -3 138.512 15.3697   5
   1  -6  -3 145.676 18.3306   3
  -1   6   3 185.328 20.0754   1
   1   6  -3 154.497 16.3825   5
   1   6  -3 174.219 18.3035   1
  -1   6   3 205.314 15.9852   5
   1   6  -3 186.088 14.3080   3
   0  -6  -3 635.899 45.3583   1
   0  -6  -3 607.962 43.5750   3
   0  -6  -3 621.735 43.1889   4
   0  -6  -3 579.834 41.1707   5
   0  -6   3 609.321 42.9832   4
   0   6  -3 567.510 42.0994   5
   0   6   3 594.114 40.5284   5
   0   6   3 616.922 45.0652   1
   0   6  -3 564.586 41.9813   3
   0   6  -3 581.589 45.1440   1
   1  -6   3 68.7272 10.3565   2
  -1  -6  -3 96.1382 8.99363   5
   1  -6   3 104.239 11.2196   4
  -1  -6  -3 106.870 14.2268   4
  -1  -6  -3 106.552 14.2489   1
  -1  -6  -3 94.8144 12.1629   3
  -1   6  -3 116.713 15.8764   1
  -1   6  -3 114.252 12.3921   5
  -1   6  -3 106.120 11.0870   4
   1   6   3 131.575 14.5816   1
  -2  -6  -3 333.307 23.2272   5
  -2  -6  -3 287.651 25.2538   3
   2  -6   3 317.518 23.4354   4
  -2  -6  -3 325.165 28.1235   4
   2  -6   3 293.848 23.8576   2
  -2  -6  -3 326.501 26.7518   1
  -2   6  -3 333.525 29.9635   1
  -2   6  -3 343.616 27.4648   5
   2   6   3 361.286 26.4904   1
  -2   6  -3 327.475 23.5248   4
  -3  -6  -3 58.9107 13.6953   4
  -3  -6  -3 56.5786 9.58852   3
  -3   6  -3 35.1975 11.3091   1
  -3   6  -3 24.0983 11.4770   5
  -4  -6  -3 29.9440 8.76477   3
  -4  -6  -3 43.3129 14.0014   4
  -4   6  -3 32.0224 15.5927   5
  -4   6  -3 30.0895 11.8707   1
  -4  -7   3 80.8082 18.6276   2
  -4  -7   3 92.9029 17.0944   4
  -4   7   3 78.3865 16.3243   1
  -4   7   3 83.6707 18.4918   5
  -3  -7   3 62.8728 16.4227   2
  -3  -7   3 79.8341 15.1035   4
   3  -7  -3 64.2931 14.3127   1
  -3   7   3 71.0345 15.6509   1
  -3   7   3 68.1714 13.6375   5
   2  -7  -3 207.893 16.4197   4
  -2  -7   3 178.092 20.5793   4
  -2  -7   3 220.834 17.7493   3
   2  -7  -3 219.555 23.9802   1
   2   7  -3 188.328 20.5925   1
  -2   7   3 217.071 20.3157   5
  -2   7   3 208.097 24.5564   1
   1  -7  -3 84.4759 14.4759   1
   1  -7  -3 72.6480 10.6454   4
   1  -7  -3 72.5323 13.2054   3
  -1  -7   3 63.7931 11.5603   4
  -1  -7   3 70.3209 12.2055   1
   1   7  -3 69.8246 11.9659   5
  -1   7   3 80.7340 11.5783   5
  -1   7   3 82.1663 15.0588   1
   1   7  -3 68.8498 12.4432   1
   1   7  -3 73.3227 8.89947   3
   0  -7  -3 51.2386 11.5950   3
   0  -7  -3 57.0619 10.4370   4
   0  -7   3 50.0037 9.91779   4
   0  -7  -3 53.1641 8.39406   5
   0  -7  -3 68.4551 13.2703   1
   0   7  -3 48.7697 9.66778   5
   0   7   3 60.0655 13.2001   1
   0   7  -3 52.2004 12.7283   1
   0   7   3 50.9632 9.22614   5
   1  -7   3 359.072 27.7363   4
   1  -7   3 337.197 28.5220   2
  -1  -7  -3 361.627 26.0616   5
  -1  -7  -3 349.502 28.9949   3
  -1  -7  -3 375.467 31.1779   1
  -1  -7  -3 390.198 31.0141   4
  -1   7  -3 343.955 32.4934   1
  -1   7  -3 368.261 28.2735   5
   1   7   3 375.030 30.7584   1
  -2  -7  -3 133.762 17.1119   1
   2  -7   3 124.622 12.3858   4
  -2  -7  -3 134.153 18.7492   4
  -2  -7  -3 123.804 15.0842   3
  -2   7  -3 155.786 20.5960   1
  -2   7  -3 136.089 17.6220   5
  -3  -7  -3 97.5541 13.7124   3
  -3  -7  -3 110.514 17.4286   4
  -3   7  -3 88.6588 16.6182   5
  -3   7  -3 115.308 19.3863   1
  -4  -7  -3 -10.444 10.4220   4
  -4   7  -3 -0.7792 13.0748   5
  -4   7  -3 8.26912 10.7596   1
  -4   8   3 4.99124 15.3098   5
  -3  -8   3 50.2659 13.6759   4
  -3  -8   3 54.8061 17.2116   2
   3  -8  -3 55.7480 15.4508   1
  -3   8   3 38.2877 13.7491   5
  -3   8   3 63.6141 17.3174   1
  -2  -8   3 48.8221 12.4171   4
   2  -8  -3 78.6825 16.9466   1
  -2   8   3 136.103 21.4785   1
  -2   8   3 86.8281 14.2579   5
   1  -8  -3 160.140 21.0623   3
   1  -8  -3 162.548 21.6145   1
  -1  -8   3 144.472 18.8693   4
   1  -8  -3 150.748 15.8150   4
   1   8  -3 162.775 20.5745   1
   1   8  -3 125.846 16.9652   5
  -1   8   3 152.002 16.1745   5
  -1   8   3 174.177 22.8414   1
   0  -8  -3 116.259 16.4333   3
   0  -8  -3 97.3449 16.8833   1
   0  -8   3 106.968 14.3130   4
   0  -8  -3 90.0954 13.8483   4
   0   8   3 106.653 17.6127   1
   0   8  -3 74.2257 15.3785   1
   0   8  -3 81.9730 14.3105   5
   0   8   3 85.5106 12.1257   5
  -1  -8  -3 30.1265 11.1408   4
  -1  -8  -3 24.8040 9.32334   3
   1  -8   3 33.8008 8.54396   4
  -1  -8  -3 20.1598 9.99641   1
   1   8   3 12.4667 8.59461   1
  -1   8  -3 26.2955 12.7599   1
  -1   8  -3 13.0655 10.3621   5
  -2  -8  -3 39.6632 13.1739   4
  -2  -8  -3 29.3624 9.35321   3
  -2   8  -3 21.1947 10.5562   5
  -2   8  -3 16.8278 12.6593   1
  -3  -8  -3 14.7413 9.56845   3
  -3  -8  -3 10.5496 10.7509   4
  -3   8  -3 6.20987 13.3464   5
  -3   8  -3 7.82257 11.9804   1
  -3  -9   3 14.0932 11.4846   4
  -3  -9   3 16.0693 14.6510   2
  -3   9   3 8.83344 12.2321   5
  -3   9   3 -4.6840 11.6550   1
  -2  -9   3 19.0583 10.9544   4
   2  -9  -3 26.8175 13.2962   1
  -2   9   3 30.3042 14.1760   1
  -2   9   3 21.9561 11.0498   5
  -1  -9   3 -2.4422 8.28925   4
   1  -9  -3 8.66244 7.33812   4
   1  -9  -3 26.9654 12.5169   1
   1   9  -3 0.99094 9.82913   1
  -1   9   3 14.9905 11.6495   1
  -1   9   3 -10.220 8.71026   5
   1   9  -3 10.9096 9.17137   5
   0  -9  -3 37.0861 10.9259   4
   0  -9  -3 45.9768 13.5974   1
   0  -9   3 52.3519 11.7817   4
   0  -9  -3 36.8999 12.5988   3
   0   9   3 80.5993 13.1847   5
   0   9  -3 38.3664 14.5199   1
   0   9  -3 40.8271 11.2971   5
   0   9   3 30.4728 12.4802   1
  -1  -9  -3 48.0780 12.4702   4
   1  -9   3 57.4372 11.3770   4
  -1  -9  -3 69.3786 14.6325   1
  -1  -9  -3 74.4312 14.1146   3
  -1   9  -3 78.0268 14.5219   5
  -1   9  -3 110.008 20.2864   1
  -2  -9  -3 30.1237 12.3202   4
  -2  -9  -3 22.2907 9.92717   3
  -2   9  -3 15.4984 14.1673   1
  -2   9  -3 4.19259 12.2900   5
  -3  -9  -3 19.9764 13.9716   4
  -3   9  -3 16.4095 12.8599   5
  -3   9  -3 29.1714 14.3255   1
   2 -10  -3 23.1518 13.4180   1
  -2 -10   3 11.5217 11.6908   4
  -2  10   3 27.1452 16.8908   1
  -2  10   3 -7.4646 18.8270   5
   1 -10  -3 28.8498 14.0239   1
  -1 -10   3 31.1845 11.8886   4
  -1  10   3 54.4981 17.5092   1
   1  10  -3 60.3537 12.2681   5
   0 -10  -3 25.6371 10.3618   4
   0 -10  -3 32.6704 13.5843   3
   0 -10  -3 22.3051 13.5857   1
   0 -10   3 36.1767 11.2392   4
   0  10  -3 50.4658 16.3807   1
   0  10  -3 58.3135 12.7990   5
  -1 -10  -3 2.55124 10.0798   3
  -1 -10  -3 16.6499 10.8559   4
  -1  10  -3 6.02951 13.8580   1
  -1  10  -3 11.2171 12.2764   5
  -2 -10  -3 7.28897 10.9590   4
  -2  10  -3 -12.135 12.6304   5
  -2  10  -3 13.5052 15.5714   1
  -6   0   4 6.96788 16.5428   5
  -6   0   4 4.21869 12.4549   2
  -5   0   4 15.4752 10.7406   2
  -5   0   4 12.8954 5.66920   1
  -5   0   4 -0.1758 5.85414   4
  -5   0   4 3.88377 12.7086   5
   4   0  -4 331.673 24.5701   1
  -4   0   4 335.847 25.2408   4
  -4   0   4 331.964 29.1603   2
  -4   0   4 316.203 24.9489   1
  -3   0   4 185.745 18.1189   2
  -3   0   4 176.986 15.2919   4
  -3   0   4 188.370 15.6764   1
   3   0  -4 198.542 15.7720   4
  -3   0   4 188.044 16.0595   3
  -2   0   4 673.350 45.4846   4
  -2   0   4 690.143 46.3428   1
   2   0  -4 653.204 47.3985   2
  -2   0   4 678.421 47.4917   2
  -2   0   4 670.607 45.5279   3
   2   0  -4 704.239 45.8006   4
   2   0  -4 646.354 46.0403   1
   1   0  -4 264.818 20.3612   1
   1   0  -4 279.487 20.8418   2
  -1   0   4 289.739 19.6955   4
  -1   0   4 283.971 19.1503   3
   1   0  -4 287.617 19.7132   4
  -1   0   4 277.288 20.4445   1
  -1   0   4 269.231 20.6761   2
   1   0  -4 260.853 19.1704   3
   0   0  -4 3073.23 200.152   3
   0   0   4 3061.78 200.330   4
   0   0  -4 3009.59 200.685   1
   0   0  -4 2933.44 199.713   5
   0   0  -4 3107.72 200.270   4
   0   0   4 3055.70 200.670   1
   0   0   4 3083.68 200.186   3
   0   0  -4 3160.05 200.180   2
   0   0   4 3223.10 199.651   5
   0   0   4 3169.30 200.126   2
   1   0   4 2768.27 173.000   1
  -1   0  -4 2740.83 173.097   5
  -1   0  -4 2685.27 173.076   1
  -1   0  -4 2655.88 173.858   3
   1   0   4 2463.09 173.197   5
  -2   0  -4 1599.78 99.3432   5
  -2   0  -4 1515.64 97.0281   1
   2   0   4 1459.52 96.5728   1
   2   0   4 1363.89 98.8793   5
  -3   0  -4 601.412 42.8369   2
  -3   0  -4 613.008 39.8767   1
  -3   0  -4 612.069 39.8365   1
  -3   0  -4 550.257 43.8276   5
  -4   0  -4 73.9111 12.7086   2
  -4   0  -4 71.5530 11.2304   4
  -4   0  -4 86.1687 15.5142   5
  -5   0  -4 137.109 20.2434   5
  -5   0  -4 164.887 18.1807   4
  -5   0  -4 162.023 18.9241   2
  -5   0  -4 172.193 21.6792   3
  -6  -1   4 20.6906 13.5981   2
  -6  -1   4 19.9377 15.6543   5
  -6   1   4 -1.6431 11.0261   2
  -6   1   4 -4.9175 5.15874   1
  -5  -1   4 172.686 18.5981   4
  -5  -1   4 182.198 23.7021   2
  -5   1   4 217.485 18.0314   1
  -5   1   4 158.686 24.5258   5
  -5   1   4 201.627 23.5191   2
  -4  -1   4 89.7469 12.1455   4
   4  -1  -4 105.889 11.2351   1
  -4  -1   4 106.233 16.3269   2
  -4  -1   4 95.3318 10.2157   1
  -4   1   4 94.9412 15.1326   2
  -4   1   4 86.6260 16.3272   5
  -4   1   4 94.7102 11.5756   1
   4   1  -4 92.6288 9.44385   1
  -4   1   4 86.3885 9.95438   4
   3  -1  -4 966.028 67.5918   1
   3  -1  -4 1036.37 66.4917   4
  -3  -1   4 969.898 69.8671   2
  -3  -1   4 985.098 67.6590   4
  -3  -1   4 962.550 66.9843   1
  -3   1   4 1002.01 69.3635   2
   3   1  -4 1020.40 66.9613   1
   3   1  -4 1037.85 68.0103   4
  -3   1   4 975.525 67.9370   3
  -3   1   4 989.711 68.0015   1
  -3   1   4 1002.04 66.1639   4
  -2  -1   4 115.923 10.0613   4
  -2  -1   4 108.934 8.22321   3
  -2  -1   4 94.1100 9.63025   1
   2  -1  -4 105.009 8.61824   4
   2  -1  -4 109.208 10.5569   1
   2  -1  -4 106.361 11.3989   2
  -2  -1   4 114.190 11.8964   2
   2   1  -4 85.5765 11.0010   2
   2   1  -4 89.4567 9.30955   1
   2   1  -4 68.0894 9.71558   4
  -2   1   4 84.7624 8.11097   4
  -2   1   4 92.9512 10.6294   2
  -2   1   4 85.7516 10.3496   1
  -2   1   4 70.9413 9.56594   3
  -1  -1   4 2788.10 169.177   3
   1  -1  -4 2734.99 170.717   3
  -1  -1   4 2697.47 171.551   2
   1  -1  -4 2840.07 170.024   4
  -1  -1   4 2837.67 170.841   4
  -1  -1   4 2666.92 170.976   1
   1  -1  -4 2727.63 171.495   1
   1   1  -4 2535.42 171.411   2
   1   1  -4 2530.34 169.226   3
  -1   1   4 2419.70 170.884   2
   1   1  -4 2370.68 170.812   1
  -1   1   4 2501.76 171.259   1
  -1   1   4 2551.57 170.412   3
   1   1  -4 2528.35 170.664   4
  -1   1   4 2565.10 169.975   4
   0  -1  -4 1267.52 81.2428   2
   0  -1   4 1144.33 81.5108   1
   0  -1   4 1303.24 80.6372   5
   0  -1  -4 1157.31 81.5683   1
   0  -1  -4 1130.66 81.0010   3
   0  -1   4 1213.75 80.8005   2
   0  -1   4 1193.72 81.0992   4
   0   1   4 1265.47 81.7097   1
   0   1   4 1334.21 81.4024   2
   0   1  -4 1274.02 80.8761   2
   0   1   4 1235.51 81.0968   3
   0   1  -4 1278.01 80.8033   5
   0   1  -4 1247.43 81.7848   1
   0   1   4 1180.03 80.0242   5
   0   1  -4 1294.57 81.1631   4
  -1  -1  -4 823.042 54.3014   3
  -1  -1  -4 820.339 53.5202   1
   1  -1   4 804.388 53.8762   1
  -1  -1  -4 832.669 53.1848   5
   1  -1   4 778.100 54.0642   5
  -1   1  -4 822.095 53.8632   5
   1   1   4 810.860 53.3598   1
  -1   1  -4 767.578 53.9291   1
   1   1   4 775.509 54.1533   3
  -1   1  -4 850.919 53.6430   4
   1   1   4 706.036 53.2223   5
  -1   1  -4 855.739 52.3004   2
  -2  -1  -4 671.846 44.1332   5
   2  -1   4 542.421 44.2565   5
  -2  -1  -4 650.573 41.6138   1
   2  -1   4 615.626 42.4033   1
  -2  -1  -4 635.667 44.1628   3
  -2   1  -4 635.315 42.8987   1
  -2   1  -4 653.691 44.6510   5
  -2   1  -4 622.899 42.7365   1
  -2   1  -4 630.623 42.4828   2
  -3  -1  -4 414.711 31.6733   2
  -3  -1  -4 405.568 32.0531   5
  -3  -1  -4 443.403 31.7589   3
  -3   1  -4 377.844 28.7329   1
  -3   1  -4 416.295 28.9208   1
  -3   1  -4 396.482 29.7439   2
  -3   1  -4 428.828 33.0660   5
  -4  -1  -4 232.114 20.4046   4
  -4  -1  -4 230.582 22.1279   2
  -4  -1  -4 222.786 22.6678   5
  -4  -1  -4 255.492 21.8525   3
  -4   1  -4 224.622 16.7995   1
  -4   1  -4 183.104 16.4248   1
  -4   1  -4 209.467 22.6262   5
  -4   1  -4 223.427 18.7977   4
  -4   1  -4 211.545 19.4824   2
  -5  -1  -4 9.61685 9.60122   2
  -5  -1  -4 7.87995 9.74427   3
  -5  -1  -4 14.4989 11.1728   5
  -5  -1  -4 9.60010 8.10063   4
  -5   1  -4 16.6169 12.6284   5
  -5  -2   4 11.8425 11.7817   2
  -5  -2   4 17.5725 9.03998   4
  -5   2   4 21.6273 7.72817   1
  -5   2   4 25.6904 11.2148   2
  -5   2   4 16.2126 13.4631   5
  -4  -2   4 113.383 13.4163   3
   4  -2  -4 128.504 14.3015   1
  -4  -2   4 119.471 12.3450   1
  -4  -2   4 119.935 15.3451   4
  -4  -2   4 137.406 19.6839   2
  -4   2   4 125.870 19.4673   5
  -4   2   4 144.651 15.3106   1
  -4   2   4 150.647 11.1506   4
  -4   2   4 157.391 15.6855   1
  -4   2   4 162.250 17.1647   2
  -3  -2   4 265.598 25.8187   4
   3  -2  -4 323.121 26.5244   1
  -3  -2   4 315.526 25.0145   1
  -3  -2   4 314.979 28.8983   2
   3   2  -4 373.691 25.1997   1
  -3   2   4 353.923 23.3361   4
  -3   2   4 368.499 29.9014   5
  -3   2   4 372.254 27.1369   1
  -3   2   4 371.747 27.4592   2
   2  -2  -4 40.0569 7.61418   1
  -2  -2   4 56.4646 5.03102   3
  -2  -2   4 62.8493 8.79350   4
   2  -2  -4 50.4928 5.56623   4
  -2  -2   4 58.2704 10.0155   2
   2  -2  -4 65.9545 9.17868   2
  -2  -2   4 61.6215 7.82120   1
  -2   2   4 59.3026 8.91263   2
  -2   2   4 54.7789 10.0281   5
  -2   2   4 53.7753 8.34909   3
  -2   2   4 56.9722 9.10215   1
   2   2  -4 57.1050 7.49171   1
   2   2  -4 63.0508 8.99120   4
   1  -2  -4 317.918 23.3477   1
   1  -2  -4 337.285 22.6981   2
  -1  -2   4 325.963 22.7008   1
  -1  -2   4 301.775 22.3899   4
   1  -2  -4 334.132 22.8168   3
  -1  -2   4 313.245 23.0737   2
  -1  -2   4 311.699 21.8214   5
   1  -2  -4 339.584 21.0137   4
  -1   2   4 261.754 22.3162   5
  -1   2   4 261.196 22.2150   2
  -1   2   4 285.555 22.0217   3
   1   2  -4 272.467 22.3968   1
  -1   2   4 267.041 23.0294   1
   1   2  -4 284.017 22.2987   4
   0  -2   4 1093.04 76.1027   2
   0  -2   4 1102.06 77.0435   1
   0  -2   4 1240.00 76.0225   5
   0  -2  -4 1167.20 76.7278   2
   0  -2  -4 1103.97 76.5842   3
   0  -2  -4 1081.62 77.1044   1
   0  -2   4 1111.34 76.3706   4
   0   2   4 1110.13 74.9821   5
   0   2   4 1173.37 76.8035   2
   0   2  -4 1209.33 76.5531   4
   0   2  -4 1270.55 76.2225   5
   0   2   4 1201.44 76.5975   3
   0   2  -4 1152.09 77.2801   1
   0   2   4 1168.18 77.2687   1
  -1  -2  -4 380.690 27.9232   5
  -1  -2  -4 401.439 29.1206   1
   1  -2   4 400.732 28.7861   4
   1  -2   4 386.693 29.5986   1
   1  -2   4 363.351 29.5462   5
  -1  -2  -4 403.246 29.4933   3
   1   2   4 464.888 29.2292   1
  -1   2  -4 454.238 28.7086   4
   1   2   4 462.961 29.8163   3
  -1   2  -4 433.807 30.0495   1
  -1   2  -4 452.713 29.4331   5
  -2  -2  -4 978.432 59.6586   1
  -2  -2  -4 987.941 61.7646   3
   2  -2   4 890.992 60.8023   1
   2  -2   4 865.251 62.5178   5
  -2  -2  -4 926.447 61.3471   5
   2   2   4 901.652 59.0827   1
  -2   2  -4 897.019 58.9804   2
  -2   2  -4 907.300 62.3481   5
  -2   2  -4 868.689 61.1820   1
   2   2   4 851.737 58.9067   1
  -2   2  -4 874.750 59.8979   4
  -2   2  -4 886.688 61.2715   1
  -3  -2  -4 220.677 21.9835   3
  -3  -2  -4 226.958 22.3957   4
  -3  -2  -4 232.220 22.6062   5
  -3   2  -4 290.035 20.2346   2
  -3   2  -4 273.910 21.1990   1
  -3   2  -4 304.031 24.6424   5
  -3   2  -4 259.812 21.1481   1
  -3   2  -4 313.354 20.3560   4
  -4  -2  -4 112.924 14.7986   3
  -4  -2  -4 127.945 15.0572   4
  -4  -2  -4 151.875 17.6675   2
  -4  -2  -4 106.505 15.7807   5
  -4   2  -4 79.1253 11.6165   2
  -4   2  -4 103.595 11.5730   1
  -4   2  -4 74.5176 15.7808   5
  -4   2  -4 101.122 11.2767   4
  -5  -2  -4 82.3219 14.7135   3
  -5  -2  -4 50.6318 13.8438   2
  -5  -2  -4 58.8799 14.1564   5
  -5  -2  -4 60.9947 13.1275   4
  -5   2  -4 80.6869 16.9063   5
  -5   2  -4 73.0806 9.65049   1
  -5  -3   4 98.2021 15.0542   4
  -5  -3   4 91.4737 18.9144   2
  -5   3   4 87.1830 14.8136   1
  -5   3   4 77.2446 14.6259   2
  -5   3   4 72.9767 17.9470   5
  -4  -3   4 157.467 22.0378   2
  -4  -3   4 178.192 14.7764   3
  -4  -3   4 159.731 18.1836   4
  -4  -3   4 162.443 14.8632   1
  -4   3   4 181.947 22.6894   5
  -4   3   4 155.558 18.0222   1
  -4   3   4 202.599 19.2903   2
  -3  -3   4 429.316 30.2316   1
   3  -3  -4 457.712 32.8077   1
  -3  -3   4 418.065 32.0358   4
  -3  -3   4 414.887 34.2079   2
  -3  -3   4 429.987 28.3238   3
  -3   3   4 394.588 31.7841   2
  -3   3   4 385.987 33.9955   5
   3   3  -4 395.918 29.7964   1
  -3   3   4 381.834 32.0605   1
  -3   3   4 413.804 32.5626   1
  -2  -3   4 155.306 15.4384   5
  -2  -3   4 177.350 15.7864   1
   2  -3  -4 166.432 17.3709   1
  -2  -3   4 170.892 16.8721   4
  -2  -3   4 188.501 18.7742   2
   2  -3  -4 190.617 16.7910   2
   2  -3  -4 172.729 13.0212   4
   2   3  -4 215.428 16.2785   1
  -2   3   4 237.373 17.2203   2
  -2   3   4 219.197 18.2891   1
  -2   3   4 234.125 19.2147   5
  -1  -3   4 917.461 62.4898   2
  -1  -3   4 931.851 61.9258   1
   1  -3  -4 920.696 62.0799   3
   1  -3  -4 886.839 62.6259   1
   1  -3  -4 886.123 61.4912   2
  -1  -3   4 960.113 60.9421   5
  -1  -3   4 853.467 61.5621   4
   1   3  -4 922.145 59.1109   3
   1   3  -4 771.115 60.8425   5
  -1   3   4 931.686 61.6100   2
   1   3  -4 932.533 62.0285   1
  -1   3   4 925.007 61.5283   3
   1   3  -4 984.422 61.9227   4
  -1   3   4 923.497 62.6791   1
  -1   3   4 880.106 61.1821   5
   0  -3  -4 535.364 42.6774   5
   0  -3  -4 618.527 44.3932   2
   0  -3  -4 575.687 45.0702   1
   0  -3  -4 583.632 44.3372   3
   0  -3   4 604.961 45.0638   1
   0  -3   4 657.213 43.6467   5
   0  -3   4 612.786 44.2141   4
   0   3  -4 682.695 45.6391   1
   0   3  -4 704.380 44.4869   4
   0   3   4 723.790 42.4424   5
   0   3  -4 721.019 43.9803   5
   0   3   4 725.220 44.6058   3
   0   3   4 650.367 45.3508   1
   0   3   4 676.301 45.4950   1
   1  -3   4 670.281 50.4429   5
  -1  -3  -4 694.031 50.1723   3
  -1  -3  -4 726.961 48.0748   5
  -1  -3  -4 720.435 50.5073   1
   1  -3   4 733.589 48.1476   2
   1  -3   4 727.642 49.4636   4
   1  -3   4 723.802 51.0037   1
  -1   3  -4 770.162 49.5912   4
  -1   3  -4 726.123 51.3948   1
  -1   3  -4 796.270 50.3917   5
   1   3   4 764.896 50.5258   1
   1   3   4 771.996 50.4594   3
   1   3   4 740.206 50.1667   1
  -1   3  -4 752.555 51.3467   1
  -2  -3  -4 392.746 34.2066   3
  -2  -3  -4 419.639 33.2217   1
  -2   3  -4 500.522 35.4247   1
  -2   3  -4 520.480 35.8399   5
   2   3   4 505.368 33.1563   1
  -2   3  -4 478.974 32.8876   4
  -2   3  -4 540.849 36.0419   1
   2   3   4 487.438 32.8654   1
   2   3   4 517.930 35.1617   3
  -3  -3  -4 94.5904 11.6336   5
  -3  -3  -4 102.472 11.3303   3
  -3  -3  -4 88.4443 12.9227   4
  -3   3  -4 50.6505 11.5792   5
  -3   3  -4 53.4992 6.78346   2
  -3   3  -4 56.8927 6.95233   4
  -3   3  -4 59.6893 9.61574   1
  -3   3  -4 56.7067 9.73564   1
  -4  -3  -4 186.594 19.8636   3
  -4  -3  -4 158.774 20.7372   5
  -4  -3  -4 205.528 23.2308   2
  -4  -3  -4 189.299 21.4087   4
  -4   3  -4 239.447 19.7184   1
  -4   3  -4 266.649 26.3935   5
  -4   3  -4 224.617 19.3069   2
  -5  -3  -4 22.3947 11.6383   2
  -5  -3  -4 12.0347 9.65104   3
  -5  -3  -4 14.3092 10.1647   4
  -5  -3  -4 5.11932 10.4079   5
  -5   3  -4 34.6709 15.6247   5
  -5   3  -4 16.5628 7.38491   1
  -5  -4   4 97.1451 19.6707   2
  -5  -4   4 97.1195 16.1421   4
  -5   4   4 108.958 20.3566   5
  -5   4   4 111.250 17.2000   1
  -5   4   4 111.273 18.4061   2
  -4  -4   4 75.5613 13.2539   4
  -4  -4   4 62.2653 16.0288   2
  -4   4   4 84.0381 13.6202   2
  -4   4   4 59.1488 12.2434   1
  -4   4   4 69.7861 15.7620   5
   3  -4  -4 174.356 18.6224   1
  -3  -4   4 180.738 15.8830   1
  -3  -4   4 178.947 12.7491   3
  -3  -4   4 151.908 20.3809   2
  -3  -4   4 208.269 19.0176   4
  -3   4   4 143.437 18.2421   1
  -3   4   4 166.487 18.6543   1
  -3   4   4 172.082 17.4394   2
  -3   4   4 176.619 19.9468   5
  -2  -4   4 358.283 28.7557   2
  -2  -4   4 361.493 22.1282   3
   2  -4  -4 388.757 28.2570   1
  -2  -4   4 355.291 26.7446   4
   2  -4  -4 360.590 22.3093   4
   2  -4  -4 349.376 22.1394   4
   2  -4  -4 358.233 26.1764   2
  -2  -4   4 343.853 25.5436   1
  -2   4   4 239.787 26.6661   1
  -2   4   4 255.913 26.4132   1
   2   4  -4 251.345 24.9229   1
  -2   4   4 256.747 25.0004   2
   1  -4  -4 338.995 24.6894   3
  -1  -4   4 341.656 24.0941   1
  -1  -4   4 354.880 22.0523   5
  -1  -4   4 321.553 24.2308   2
  -1  -4   4 306.490 23.5644   4
   1  -4  -4 324.056 25.1304   1
   1  -4  -4 318.298 23.1030   2
   1  -4  -4 268.947 22.1811   5
  -1   4   4 255.952 23.2441   3
   1   4  -4 315.644 25.0877   1
  -1   4   4 272.545 24.2778   1
  -1   4   4 305.742 23.0831   2
  -1   4   4 258.299 21.8445   5
   1   4  -4 294.577 23.7771   1
   1   4  -4 221.273 22.1504   5
   1   4  -4 277.209 20.2775   3
   1   4  -4 279.890 23.4073   4
  -1   4   4 310.011 24.9510   1
   0  -4  -4 1117.37 83.6999   5
   0  -4   4 1278.73 86.5095   1
   0  -4   4 1287.89 84.7025   5
   0  -4  -4 1242.18 85.7429   3
   0  -4  -4 1274.33 85.6161   2
   0  -4   4 1225.47 85.1885   4
   0  -4  -4 1278.06 86.9966   1
   0   4  -4 1308.18 85.5495   4
   0   4   4 1348.25 86.7671   1
   0   4  -4 1368.83 85.0011   5
   0   4   4 1350.38 83.2586   5
   0   4  -4 1256.88 86.5825   1
   0   4  -4 1249.00 86.7702   1
   0   4   4 1306.57 85.4971   3
   0   4   4 1316.74 86.8998   1
   0   4  -4 1247.45 84.8798   3
  -1  -4  -4 532.911 36.1637   3
   1  -4   4 500.562 33.9292   2
  -1  -4  -4 526.193 36.7989   1
  -1  -4  -4 575.404 33.2955   5
   1  -4   4 539.927 35.0653   4
  -1   4  -4 485.324 35.5344   5
  -1   4  -4 444.400 37.0153   1
  -1   4  -4 446.229 34.7847   4
  -1   4  -4 496.545 37.7271   1
   1   4   4 468.396 36.0711   1
   1   4   4 478.769 35.6553   3
   2  -4   4 428.635 28.1649   2
  -2  -4  -4 387.701 28.8481   5
  -2  -4  -4 444.695 31.1280   3
  -2  -4  -4 415.868 30.3943   1
  -2  -4  -4 445.856 33.1800   4
  -2   4  -4 416.669 32.6053   1
  -2   4  -4 424.080 29.1716   4
  -2   4  -4 430.726 32.9113   1
  -2   4  -4 397.147 31.7368   5
   2   4   4 429.698 29.8825   1
  -3  -4  -4 377.635 30.5855   3
  -3  -4  -4 397.366 32.6014   4
  -3   4  -4 423.489 32.5653   1
  -3   4  -4 412.667 27.6452   4
   3   4   4 388.558 26.8867   1
  -3   4  -4 410.439 33.2818   5
  -3   4  -4 417.129 32.2356   1
  -4  -4  -4 24.7023 8.63614   3
  -4  -4  -4 17.7575 10.3768   2
  -4  -4  -4 28.7811 9.23388   5
  -4  -4  -4 27.6670 10.7115   4
  -4   4  -4 9.23083 11.5110   5
  -4   4  -4 13.1868 7.91748   1
  -5  -4  -4 72.2817 16.0942   2
  -5  -4  -4 66.2087 12.6759   3
  -5  -4  -4 34.7163 12.8607   5
  -5  -4  -4 64.1277 15.4702   4
  -5   4  -4 46.7497 18.8723   5
  -5   4  -4 63.6704 11.4370   1
  -5  -5   4 68.4261 14.6390   4
  -5  -5   4 29.3755 13.8624   2
  -5   5   4 15.0774 10.6284   1
  -5   5   4 38.9351 15.6721   5
  -4  -5   4 59.0110 15.5571   2
  -4  -5   4 66.5993 13.7194   4
  -4   5   4 58.6543 12.6250   2
  -4   5   4 58.7600 14.1448   1
  -4   5   4 55.2662 15.2112   5
  -3  -5   4 198.118 17.6605   1
  -3  -5   4 213.045 23.6286   2
  -3  -5   4 192.699 13.6413   3
   3  -5  -4 165.933 20.2565   1
  -3  -5   4 191.975 20.2802   4
  -3   5   4 172.502 19.2682   2
  -3   5   4 182.148 22.2281   5
  -3   5   4 199.488 20.8365   1
  -3   5   4 170.225 20.8126   1
   3   5  -4 181.039 17.1588   1
   2  -5  -4 284.776 19.2338   4
   2  -5  -4 290.128 25.5958   1
  -2  -5   4 258.264 23.5803   4
  -2  -5   4 271.020 25.7472   2
  -2  -5   4 287.338 19.2860   3
   2  -5  -4 297.140 19.1339   4
  -2  -5   4 294.027 23.1513   1
  -2   5   4 258.773 22.7106   2
  -2   5   4 260.123 24.7306   1
   2   5  -4 240.644 18.8737   3
  -2   5   4 247.499 25.1210   1
   2   5  -4 245.678 22.5796   1
  -2   5   4 267.320 23.5175   5
   1  -5  -4 702.283 53.4587   5
  -1  -5   4 847.567 55.3343   1
   1  -5  -4 810.042 55.6723   3
   1  -5  -4 852.952 56.8933   1
  -1  -5   4 843.528 55.1309   4
   1  -5  -4 792.341 52.8990   4
  -1   5   4 811.865 56.6810   1
   1   5  -4 750.822 55.1486   1
   1   5  -4 710.630 51.7483   3
  -1   5   4 737.818 52.8219   5
   0  -5  -4 509.333 36.8554   4
   0  -5  -4 461.289 36.9368   3
   0  -5  -4 459.991 34.7029   5
   0  -5   4 524.635 36.6746   4
   0  -5  -4 528.166 38.8767   1
   0  -5   4 516.805 38.0494   1
   0   5   4 532.108 38.5255   1
   0   5  -4 503.429 36.0568   3
   0   5  -4 495.728 38.4169   1
   0   5  -4 564.924 37.0792   4
   0   5  -4 514.827 36.2524   5
   0   5   4 507.746 34.1529   5
  -1  -5  -4 78.5328 10.9969   3
  -1  -5  -4 93.7617 12.2328   1
   1  -5   4 98.5664 10.1799   4
   1  -5   4 88.3740 8.78938   2
  -1  -5  -4 92.5681 12.6441   4
  -1  -5  -4 95.8619 7.53380   5
  -1   5  -4 74.1295 9.68033   4
  -1   5  -4 86.5023 13.4309   1
  -1   5  -4 71.9540 12.2589   1
   1   5   4 97.6082 12.0331   1
  -1   5  -4 89.9086 10.9306   5
  -2  -5  -4 279.250 23.8686   4
   2  -5   4 266.385 19.2176   4
  -2  -5  -4 264.244 21.4354   1
  -2  -5  -4 268.735 18.5235   5
   2  -5   4 254.957 18.3908   2
  -2  -5  -4 270.342 21.3815   3
   2   5   4 242.112 20.3330   1
  -2   5  -4 242.219 23.5234   1
  -2   5  -4 230.880 23.1588   1
  -2   5  -4 246.455 22.0247   5
  -2   5  -4 226.537 18.9196   4
  -3  -5  -4 134.881 12.8191   5
  -3  -5  -4 127.577 18.3048   4
  -3  -5  -4 137.511 14.6905   3
  -3   5  -4 150.569 19.6972   5
  -3   5  -4 137.931 17.6342   1
  -4  -5  -4 79.7347 13.0608   3
  -4  -5  -4 118.266 18.5729   4
  -4  -5  -4 91.5319 14.1613   5
  -4   5  -4 101.981 16.1678   1
  -4   5  -4 74.5481 18.0150   5
  -5  -5  -4 -5.9363 10.5316   4
  -5  -5  -4 10.6784 13.2055   2
  -5   5  -4 8.05602 8.68812   1
  -5  -6   4 61.0865 14.4120   4
  -5   6   4 40.6912 18.4783   5
  -4  -6   4 58.4693 13.5869   4
  -4  -6   4 26.6765 14.0846   2
  -4   6   4 31.8021 12.8896   1
  -4   6   4 42.5045 12.6627   2
  -4   6   4 40.6047 15.7410   5
  -3  -6   4 66.8618 16.1337   2
  -3  -6   4 81.0328 14.1867   4
   3  -6  -4 75.6252 14.7642   1
  -3   6   4 57.2361 12.2185   2
  -3   6   4 61.6859 14.2701   5
  -3   6   4 60.8742 14.4143   1
  -2  -6   4 75.3958 12.7817   1
  -2  -6   4 87.7886 15.7024   2
   2  -6  -4 79.4272 14.0389   1
  -2  -6   4 75.1434 13.2327   4
   2  -6  -4 72.5290 8.35036   4
   2   6  -4 85.5826 8.05743   3
   2   6  -4 78.6376 12.5987   1
  -2   6   4 91.7056 13.3186   5
  -2   6   4 73.6511 14.2972   1
   1  -6  -4 208.430 20.1879   1
   1  -6  -4 163.866 17.5406   3
   1  -6  -4 183.609 14.9184   4
  -1  -6   4 145.980 16.8844   4
  -1  -6   4 160.032 17.3798   1
   1  -6  -4 150.827 15.2161   5
   1   6  -4 183.002 18.1699   1
  -1   6   4 154.586 14.6820   5
   1   6  -4 117.648 15.7832   5
   1   6  -4 160.916 13.2994   3
  -1   6   4 187.496 20.3565   1
   0  -6  -4 213.240 21.0448   1
   0  -6  -4 186.242 18.0774   4
   0  -6   4 188.449 18.0161   4
   0  -6  -4 212.385 19.3578   3
   0  -6  -4 183.673 15.8427   5
   0   6  -4 202.120 18.3178   5
   0   6  -4 224.876 21.0967   1
   0   6   4 207.282 15.5338   5
   0   6   4 204.689 20.7437   1
   0   6  -4 185.757 16.6863   3
  -1  -6  -4 381.543 27.8760   3
   1  -6   4 413.668 26.9559   4
   1  -6   4 379.050 25.6963   2
  -1  -6  -4 363.020 29.1182   1
  -1  -6  -4 381.601 29.1360   4
  -1  -6  -4 362.909 24.3474   5
  -1   6  -4 279.733 25.9290   4
  -1   6  -4 297.126 26.9316   5
   1   6   4 324.485 28.3516   1
  -1   6  -4 288.513 29.6883   1
   2  -6   4 108.659 11.4373   4
  -2  -6  -4 113.504 14.4280   1
  -2  -6  -4 117.102 13.7164   3
  -2  -6  -4 102.235 16.5434   4
  -2  -6  -4 119.713 10.4424   5
   2  -6   4 98.3182 11.0001   2
   2   6   4 145.247 14.1039   1
  -2   6  -4 164.464 19.0018   1
  -2   6  -4 155.460 12.0598   4
  -2   6  -4 127.425 15.3588   5
  -3  -6  -4 70.3415 14.2270   4
  -3  -6  -4 92.9146 12.8681   3
  -3   6  -4 90.5833 15.9230   1
  -3   6  -4 72.6375 14.3111   5
  -4  -6  -4 5.50327 7.35085   3
  -4  -6  -4 2.39288 10.3726   4
  -4   6  -4 10.6429 14.2232   5
  -4   6  -4 4.16382 9.45905   1
  -4  -7   4 27.9151 12.3203   4
  -4  -7   4 -1.0946 12.6909   2
  -4   7   4 14.8797 14.5146   5
  -4   7   4 12.1741 11.5536   1
  -3  -7   4 92.5790 18.4789   2
  -3  -7   4 88.2619 15.3690   4
   3  -7  -4 62.6587 14.5467   1
  -3   7   4 88.6746 16.2491   1
  -3   7   4 69.8114 15.1618   5
   2  -7  -4 127.078 11.8755   4
  -2  -7   4 144.711 18.0076   4
   2  -7  -4 103.877 18.3734   1
  -2  -7   4 149.625 20.4899   2
   2   7  -4 115.232 16.3408   1
  -2   7   4 144.127 20.9375   1
  -2   7   4 132.232 15.8439   5
  -1  -7   4 255.440 23.4314   4
   1  -7  -4 305.396 24.9954   3
   1  -7  -4 247.729 25.5965   1
   1  -7  -4 260.113 21.1207   4
  -1   7   4 292.957 26.9324   1
  -1   7   4 265.696 20.7199   5
   1   7  -4 250.612 24.5779   1
   1   7  -4 238.563 19.4696   3
   1   7  -4 190.837 21.7587   5
   0  -7   4 411.469 33.3746   4
   0  -7  -4 404.011 31.3719   5
   0  -7  -4 437.695 35.0438   3
   0  -7  -4 429.461 33.8565   4
   0  -7  -4 417.294 36.0206   1
   0   7  -4 434.432 33.4351   5
   0   7   4 483.442 36.9627   1
   0   7   4 442.391 30.8538   5
   0   7  -4 476.992 37.0674   1
  -1  -7  -4 54.6745 7.27874   5
   1  -7   4 60.0546 9.52533   4
   1  -7   4 28.8659 7.70356   2
  -1  -7  -4 92.2787 13.4596   4
  -1  -7  -4 83.8704 13.7711   1
  -1  -7  -4 56.8867 11.2860   3
  -1   7  -4 85.7849 13.5803   5
  -1   7  -4 79.9011 14.9126   1
   1   7   4 79.7679 12.7582   1
  -2  -7  -4 30.3020 11.1563   4
  -2  -7  -4 28.5484 9.13814   1
  -2  -7  -4 19.6745 7.99647   3
   2  -7   4 7.75545 5.49701   4
  -2   7  -4 34.2293 11.5028   5
  -2   7  -4 33.2496 12.9544   1
  -3  -7  -4 19.3544 8.25279   3
  -3  -7  -4 30.1976 12.8174   4
  -3   7  -4 48.4453 13.8778   1
  -3   7  -4 27.3585 13.1268   5
  -4  -7  -4 36.3607 13.4350   4
  -4   7  -4 23.8838 14.3308   5
  -4   7  -4 30.4124 12.6237   1
  -4   8   4 32.0926 15.2848   5
  -3  -8   4 24.4617 14.1865   2
   3  -8  -4 10.7853 11.3300   1
  -3  -8   4 7.57811 9.67999   4
  -3   8   4 18.5511 11.8262   5
  -3   8   4 9.70758 11.4610   1
   2  -8  -4 56.7109 15.5472   1
  -2  -8   4 62.0202 15.2699   2
  -2  -8   4 48.7700 12.4182   4
  -2   8   4 62.9675 15.9219   1
  -2   8   4 40.9005 11.0306   5
  -1  -8   4 45.7991 11.8342   4
   1  -8  -4 42.7718 13.1912   1
   1  -8  -4 37.9914 12.8526   3
   1  -8  -4 42.7187 9.21766   4
   1   8  -4 47.0229 11.3108   5
  -1   8   4 44.2805 9.68652   5
   1   8  -4 71.3899 14.0069   1
  -1   8   4 61.3287 15.7084   1
   0  -8  -4 132.687 16.3865   4
   0  -8   4 135.876 16.1135   4
   0  -8  -4 116.383 17.9077   3
   0  -8  -4 123.671 19.7329   1
   0   8  -4 129.112 16.9801   5
   0   8  -4 129.196 20.2667   1
   0   8   4 125.083 19.7626   1
   0   8   4 138.245 13.4569   5
  -1  -8  -4 96.8480 15.5907   4
  -1  -8  -4 50.8924 12.1964   3
  -1  -8  -4 78.0076 14.8827   1
   1  -8   4 90.0736 12.3821   4
  -1   8  -4 94.9350 17.0405   1
  -1   8  -4 82.2633 14.2155   5
   1   8   4 56.7321 12.5430   1
  -2  -8  -4 12.4683 9.53699   1
  -2  -8  -4 23.0780 9.08887   3
  -2  -8  -4 23.3957 11.3945   4
  -2   8  -4 34.5801 13.4417   1
  -2   8  -4 18.9324 11.9206   5
  -3  -8  -4 23.1097 13.2033   4
  -3  -8  -4 19.6049 8.62876   3
  -3   8  -4 -6.0908 12.0813   1
  -3   8  -4 5.65355 11.8042   5
  -3  -9   4 33.7494 15.7518   2
  -3  -9   4 10.6850 10.7827   4
  -3   9   4 1.09222 12.1590   5
  -3   9   4 20.9117 14.8091   1
   2  -9  -4 92.5576 17.7704   1
  -2  -9   4 73.0327 17.7575   2
  -2  -9   4 38.3901 12.9031   4
  -2   9   4 45.0350 12.0241   5
  -2   9   4 65.7834 18.0137   1
  -1  -9   4 67.9159 14.0247   4
   1  -9  -4 56.4971 15.2102   3
   1  -9  -4 50.2783 14.8858   1
   1  -9  -4 76.0178 11.5249   4
   1   9  -4 52.7226 14.3213   1
  -1   9   4 62.0883 17.4236   1
   1   9  -4 60.1003 13.1649   5
  -1   9   4 37.4855 10.6772   5
   0  -9  -4 75.0012 13.1836   4
   0  -9  -4 91.5931 17.4931   1
   0  -9   4 32.5815 10.9917   4
   0  -9  -4 45.6207 13.3438   3
   0   9  -4 94.7413 18.5880   1
   0   9   4 101.185 18.7206   1
   0   9  -4 64.0145 13.3706   5
  -1  -9  -4 2.77760 10.0270   1
  -1  -9  -4 14.4491 10.0958   3
  -1  -9  -4 2.16471 9.88406   4
   1  -9   4 11.6672 8.52953   4
  -1   9  -4 11.1905 11.8289   5
  -1   9  -4 17.3092 12.7242   1
  -2  -9  -4 25.8332 10.0651   3
  -2  -9  -4 13.1818 11.7660   4
  -2   9  -4 5.58092 13.2622   1
  -2   9  -4 20.5175 11.6206   5
  -3   9  -4 5.87885 19.7887   1
  -3   9  -4 21.3413 15.4577   5
  -2 -10   4 0.54367 13.2254   2
  -2 -10   4 7.49210 11.4471   4
   2 -10  -4 26.1226 13.8450   1
  -2  10   4 1.20349 13.6777   1
  -1 -10   4 16.5244 10.7742   4
   1 -10  -4 17.6532 12.3886   1
  -1  10   4 2.39048 13.6727   1
   1  10  -4 29.8640 10.9423   5
   0 -10  -4 13.1383 11.9286   3
   0 -10  -4 31.3197 10.7852   4
   0 -10  -4 26.4766 13.3791   1
   0 -10   4 13.5611 9.66096   4
   0  10  -4 0.46753 11.5210   1
   0  10  -4 44.0098 12.6169   5
  -1 -10  -4 24.0343 11.8109   3
  -1 -10  -4 26.6688 11.9961   4
  -1 -10  -4 33.3693 13.5739   1
  -1  10  -4 27.0937 12.5818   5
  -1  10  -4 0.51590 12.5720   1
  -2  10  -4 -5.9926 13.7482   5
  -6   0   5 35.3768 14.5276   2
  -5   0   5 58.8943 9.87806   4
  -5   0   5 54.8858 14.1531   2
  -5   0   5 63.2607 16.8082   5
  -4   0   5 156.592 18.8461   2
   4   0  -5 140.701 13.3261   1
  -4   0   5 121.871 13.5512   4
  -4   0   5 142.266 13.8693   1
  -3   0   5 139.055 13.4719   1
  -3   0   5 147.832 12.8173   4
  -3   0   5 138.459 15.6672   2
   3   0  -5 142.123 13.4253   4
  -3   0   5 137.447 12.9653   3
   3   0  -5 147.356 13.6042   1
   2   0  -5 854.788 60.5179   2
   2   0  -5 894.205 59.5606   1
  -2   0   5 848.932 59.3435   1
   2   0  -5 915.601 58.7292   4
  -2   0   5 829.315 60.2766   2
  -2   0   5 883.297 58.3250   3
  -2   0   5 881.557 58.5487   4
   1   0  -5 3167.62 204.030   4
  -1   0   5 3117.17 204.893   1
   1   0  -5 3021.35 204.794   1
   1   0  -5 3134.97 205.024   2
  -1   0   5 3244.57 205.052   2
  -1   0   5 3167.94 203.435   3
   1   0  -5 3099.25 203.522   3
  -1   0   5 3164.65 204.003   4
   0   0   5 2063.67 134.833   2
   0   0   5 2071.53 135.614   1
   0   0  -5 2048.48 134.915   3
   0   0   5 2036.81 134.964   3
   0   0  -5 2011.46 135.602   1
   0   0   5 2093.82 135.191   4
   0   0  -5 1967.51 134.417   5
   0   0  -5 2242.12 135.087   2
   0   0  -5 2031.24 135.038   4
   0   0   5 2135.64 134.267   5
   1   0   5 724.170 51.3342   5
  -1   0  -5 737.240 52.0992   3
   1   0   5 742.587 51.3403   1
  -1   0  -5 751.143 51.4968   1
  -1   0  -5 837.502 50.8831   2
  -1   0  -5 796.625 51.0129   5
  -2   0  -5 946.918 62.5533   1
  -2   0  -5 1005.27 64.9046   3
   2   0   5 976.259 62.2238   1
  -2   0  -5 960.940 64.1319   5
   2   0   5 824.592 63.9531   5
  -3   0  -5 376.241 25.8292   1
  -3   0  -5 359.641 25.7302   1
  -3   0  -5 395.802 28.7660   2
  -3   0  -5 376.891 30.1177   5
  -4   0  -5 153.005 16.0599   4
  -4   0  -5 162.213 19.3303   5
  -4   0  -5 151.696 19.2281   3
  -4   0  -5 136.322 16.6257   2
  -5   0  -5 9.44572 10.8211   5
  -5   0  -5 17.4956 11.7818   3
  -5   0  -5 15.5123 8.33876   4
  -5   0  -5 14.8166 14.2040   2
  -6  -1   5 21.8590 24.7304   5
  -6  -1   5 37.7670 14.8002   2
  -6   1   5 35.3579 8.10352   1
  -6   1   5 5.51100 11.9006   2
  -5  -1   5 143.525 22.0240   2
  -5  -1   5 148.394 16.4980   4
  -5   1   5 154.422 15.8704   1
  -5   1   5 123.917 21.9157   5
  -5   1   5 151.837 20.6730   2
  -4  -1   5 229.639 18.1140   3
  -4  -1   5 214.447 22.3099   2
  -4  -1   5 224.993 18.8253   4
  -4  -1   5 205.542 17.6741   1
  -4   1   5 189.857 21.7107   2
   4   1  -5 218.013 17.2617   1
  -4   1   5 200.859 16.8493   4
  -4   1   5 185.770 24.1535   5
  -4   1   5 193.857 18.6867   1
  -3  -1   5 58.2759 7.47395   3
  -3  -1   5 49.5426 10.7102   2
   3  -1  -5 50.5679 7.86730   4
  -3  -1   5 52.7086 8.73838   4
  -3  -1   5 56.4048 8.43384   1
   3  -1  -5 56.7073 9.34905   1
  -3   1   5 61.5207 9.60369   3
  -3   1   5 72.3595 7.55276   4
  -3   1   5 71.6143 10.0379   1
  -3   1   5 82.5106 11.4647   2
   3   1  -5 74.5952 9.97053   4
   2  -1  -5 286.620 18.7765   4
   2  -1  -5 257.632 20.5610   1
  -2  -1   5 266.191 19.8725   4
  -2  -1   5 289.868 18.0062   3
  -2  -1   5 272.916 20.1363   1
   2  -1  -5 303.136 21.4907   2
  -2  -1   5 261.388 21.7289   2
  -2   1   5 219.005 20.6913   2
   2   1  -5 224.405 21.1454   2
  -2   1   5 222.076 19.1288   3
   2   1  -5 246.089 19.7746   4
  -2   1   5 233.154 18.3152   4
  -2   1   5 220.308 20.3096   1
  -1  -1   5 419.481 30.7908   2
   1  -1  -5 408.782 30.5884   2
   1  -1  -5 442.542 29.9753   3
  -1  -1   5 434.574 28.4042   3
  -1  -1   5 379.871 29.7245   5
  -1  -1   5 431.247 30.0395   4
   1  -1  -5 430.575 31.0244   1
   1  -1  -5 457.480 29.4503   4
  -1  -1   5 417.541 30.5514   1
   1   1  -5 445.187 31.0337   2
  -1   1   5 427.582 30.6682   2
  -1   1   5 429.367 29.5760   3
   1   1  -5 424.398 30.6019   1
   1   1  -5 426.933 28.3900   3
  -1   1   5 453.754 29.5120   4
   1   1  -5 458.261 30.2947   4
  -1   1   5 404.154 30.9529   1
   0  -1   5 1525.89 98.8733   2
   0  -1  -5 1465.66 99.8655   1
   0  -1   5 1526.71 99.8991   1
   0  -1  -5 1619.10 99.4508   2
   0  -1  -5 1524.95 99.2634   3
   0  -1   5 1710.99 98.7263   5
   0  -1   5 1589.67 99.4513   4
   0   1   5 1400.75 97.9789   5
   0   1   5 1520.97 99.3031   3
   0   1  -5 1477.65 99.1313   4
   0   1  -5 1524.15 98.8020   5
   0   1   5 1509.54 99.3362   2
   0   1  -5 1509.82 98.9421   2
   0   1  -5 1419.93 98.8300   3
   0   1   5 1439.58 99.7438   1
   0   1  -5 1420.30 99.8041   1
  -1  -1  -5 712.382 46.2669   5
  -1  -1  -5 715.827 47.2349   1
   1  -1   5 675.938 47.4336   5
   1  -1   5 713.085 47.4786   1
  -1  -1  -5 714.904 47.8152   3
   1   1   5 633.472 46.5647   5
  -1   1  -5 672.165 47.6675   1
  -1   1  -5 727.067 45.7717   2
   1   1   5 688.294 46.9961   1
   1   1   5 700.808 47.9212   3
  -1   1  -5 720.638 47.1122   5
  -1   1  -5 721.764 47.1869   4
   2  -1   5 565.258 46.8208   5
  -2  -1  -5 692.128 44.8923   1
  -2  -1  -5 663.152 46.4232   5
  -2  -1  -5 715.793 47.2768   3
   2  -1   5 661.320 45.3986   1
   2   1   5 696.906 44.3570   1
  -2   1  -5 681.610 45.9087   1
  -2   1  -5 676.839 45.0696   2
  -2   1  -5 680.131 47.1190   5
  -3  -1  -5 10.9210 6.81268   3
  -3  -1  -5 12.1391 6.70622   5
  -3   1  -5 12.1452 4.23364   1
  -3   1  -5 14.1953 8.02403   5
  -3   1  -5 9.20059 4.28495   1
  -3   1  -5 10.7414 4.88929   2
  -4  -1  -5 35.0380 9.94330   2
  -4  -1  -5 17.5063 8.14667   4
  -4  -1  -5 34.0861 10.0966   3
  -4  -1  -5 42.9017 11.1397   5
  -4   1  -5 32.2433 7.77294   2
  -4   1  -5 46.1146 12.5336   5
  -4   1  -5 40.9257 6.22365   1
  -4   1  -5 30.7246 5.58849   1
  -5  -1  -5 44.8642 11.5055   4
  -5  -1  -5 71.4482 14.4403   3
  -5  -1  -5 71.3985 13.6162   2
  -5  -1  -5 49.5681 13.5513   5
  -5   1  -5 60.5619 16.0587   5
  -5  -2   5 31.8315 13.4361   2
  -5  -2   5 44.0986 10.4509   4
  -5   2   5 20.9288 13.6290   5
  -5   2   5 35.4640 12.0504   2
  -5   2   5 25.8386 8.81042   1
  -4  -2   5 156.147 19.5354   2
  -4  -2   5 150.742 14.0399   3
  -4  -2   5 150.510 16.2514   4
  -4  -2   5 155.738 14.1919   1
   4  -2  -5 142.137 15.8108   1
  -4   2   5 157.353 18.2063   2
  -4   2   5 144.750 21.9900   5
  -4   2   5 155.865 12.2407   4
  -4   2   5 131.333 16.1325   1
   3  -2  -5 281.864 19.2488   4
   3  -2  -5 265.916 22.3471   1
  -3  -2   5 249.166 24.0301   2
  -3  -2   5 272.572 21.0417   1
  -3  -2   5 262.265 22.0931   4
  -3  -2   5 294.446 19.4862   3
  -3   2   5 255.927 22.4804   1
  -3   2   5 247.802 22.7791   2
  -3   2   5 263.459 18.9339   4
  -3   2   5 227.930 24.2484   5
  -2  -2   5 1007.14 68.0763   1
  -2  -2   5 1019.67 68.4107   4
  -2  -2   5 996.347 69.7204   2
   2  -2  -5 1043.10 66.2824   4
   2  -2  -5 986.080 69.0027   2
   2  -2  -5 995.650 68.9856   1
   2   2  -5 969.972 68.0218   1
  -2   2   5 1006.88 66.2531   4
   2   2  -5 1021.76 68.5292   4
  -2   2   5 993.661 69.0156   1
  -2   2   5 976.326 68.6224   2
   2   2  -5 1059.25 70.0764   2
   1  -2  -5 843.141 55.5905   1
   1  -2  -5 800.252 53.3497   4
  -1  -2   5 827.570 54.9224   1
   1  -2  -5 840.011 54.8564   2
  -1  -2   5 792.394 55.1923   2
  -1  -2   5 795.755 54.0842   5
   1  -2  -5 774.479 54.3990   3
  -1  -2   5 770.364 54.3158   4
   1   2  -5 805.018 55.1333   2
   1   2  -5 726.455 54.6278   1
  -1   2   5 780.182 55.3603   1
  -1   2   5 795.858 54.6388   2
   1   2  -5 867.739 54.7128   4
  -1   2   5 821.026 54.3453   3
   0  -2   5 533.772 39.4398   2
   0  -2   5 586.953 40.8115   1
   0  -2   5 554.290 39.9545   4
   0  -2  -5 611.725 40.3842   2
   0  -2   5 653.709 39.4708   5
   0  -2  -5 541.705 40.7691   1
   0  -2  -5 546.642 40.0566   3
   0   2   5 586.830 40.4259   2
   0   2  -5 577.913 40.9816   1
   0   2  -5 613.765 40.1742   4
   0   2   5 564.266 40.7756   1
   0   2  -5 599.602 39.6063   5
   0   2   5 597.697 40.0722   3
   0   2  -5 600.022 39.6247   2
  -1  -2  -5 1995.61 131.201   3
   1  -2   5 1940.09 131.285   1
  -1  -2  -5 2014.62 129.232   5
   1  -2   5 2071.62 130.629   4
  -1  -2  -5 1970.57 130.935   1
   1  -2   5 1873.62 131.102   5
  -1   2  -5 2018.41 130.417   4
  -1   2  -5 1950.32 131.623   1
   1   2   5 1946.30 131.270   3
   1   2   5 2014.42 130.814   1
  -1   2  -5 2135.56 130.823   5
  -2  -2  -5 414.555 28.3331   1
  -2  -2  -5 435.318 29.5589   5
  -2  -2  -5 411.695 30.3634   3
  -2   2  -5 392.815 29.8412   1
  -2   2  -5 423.165 30.5901   5
   2   2   5 386.369 27.6496   1
  -2   2  -5 380.843 29.5801   1
   2   2   5 422.286 27.8479   1
  -2   2  -5 408.975 28.7026   4
  -3  -2  -5 241.476 20.6112   5
  -3  -2  -5 249.401 20.6390   3
  -3   2  -5 223.144 17.1682   2
  -3   2  -5 211.183 22.0648   5
  -3   2  -5 220.653 18.8125   1
  -3   2  -5 233.169 18.0234   4
  -3   2  -5 220.843 18.8472   1
  -4  -2  -5 147.621 17.7798   5
  -4  -2  -5 118.403 16.9751   2
  -4  -2  -5 119.866 16.2070   3
  -4  -2  -5 114.656 15.6226   4
  -4   2  -5 105.667 12.5674   1
  -4   2  -5 124.240 12.6986   2
  -4   2  -5 132.536 19.7953   5
  -5  -2  -5 35.5783 11.2583   3
  -5  -2  -5 40.7287 12.6215   2
  -5  -2  -5 31.5370 12.2684   5
  -5  -2  -5 34.3430 10.9121   4
  -5   2  -5 29.7651 6.70770   1
  -5   2  -5 18.0819 13.5569   5
  -5  -3   5 37.9121 10.4960   4
  -5  -3   5 27.3484 15.0155   2
  -5   3   5 54.3390 13.0974   2
  -5   3   5 31.9015 9.99738   1
  -5   3   5 50.8277 16.4135   5
  -4  -3   5 132.331 19.9596   2
  -4  -3   5 167.850 18.1740   4
  -4  -3   5 160.518 13.5489   3
  -4   3   5 151.941 18.2225   1
  -4   3   5 158.207 23.2287   5
  -4   3   5 178.731 19.6138   2
   3  -3  -5 63.5840 11.0178   1
  -3  -3   5 63.6117 12.6121   2
  -3  -3   5 68.5375 6.13268   3
  -3  -3   5 67.9720 5.86854   3
  -3  -3   5 69.9715 9.25835   1
  -3  -3   5 66.1658 10.8305   4
  -3   3   5 42.7249 10.0051   2
   3   3  -5 42.4233 7.51889   1
  -3   3   5 46.8985 12.6121   5
  -3   3   5 52.4290 10.0765   1
   2  -3  -5 553.127 33.6309   4
  -2  -3   5 536.809 38.4505   2
   2  -3  -5 495.759 36.5989   2
  -2  -3   5 495.466 36.5383   4
  -2  -3   5 590.835 36.7631   1
   2  -3  -5 547.246 37.5100   3
   2  -3  -5 505.243 37.5577   1
   2   3  -5 436.739 35.7953   1
  -2   3   5 472.043 37.4487   1
  -2   3   5 439.283 35.8950   2
  -2   3   5 437.781 37.2736   5
  -1  -3   5 389.517 27.1837   5
   1  -3  -5 397.511 29.4284   1
   1  -3  -5 351.533 28.2677   3
  -1  -3   5 375.393 28.8854   2
   1  -3  -5 393.246 28.3077   2
  -1  -3   5 384.556 28.4391   1
  -1  -3   5 377.293 28.0346   4
   1   3  -5 340.613 27.4881   5
   1   3  -5 392.175 25.2256   3
  -1   3   5 394.817 27.9190   3
  -1   3   5 380.652 27.5897   5
  -1   3   5 374.906 28.2592   2
   1   3  -5 381.630 28.2864   4
  -1   3   5 383.083 29.4522   1
   1   3  -5 378.382 28.6134   1
   0  -3   5 1310.59 90.0510   4
   0  -3   5 1464.57 89.6649   5
   0  -3  -5 1348.33 90.4997   3
   0  -3   5 1329.26 91.0649   1
   0  -3  -5 1410.09 90.7278   2
   0  -3  -5 1363.19 91.4322   1
   0  -3   5 1313.52 89.8381   2
   0   3  -5 1331.36 91.3771   1
   0   3  -5 1366.01 89.7342   5
   0   3   5 1299.71 90.2150   3
   0   3   5 1364.93 91.3637   1
   0   3  -5 1419.32 90.3993   4
   0   3   5 1336.77 88.0286   5
   1  -3   5 763.975 57.1354   5
  -1  -3  -5 761.453 56.9570   1
   1  -3   5 798.848 57.5242   1
   1  -3   5 816.199 56.2753   4
  -1  -3  -5 835.483 57.1110   3
   1   3   5 808.239 56.8108   1
  -1   3  -5 841.050 58.0835   1
   1   3   5 890.002 57.3834   3
  -1   3  -5 922.631 56.5223   4
  -1   3  -5 859.851 56.6523   5
   1   3   5 864.388 57.1118   1
  -1   3  -5 902.054 58.4161   1
  -2  -3  -5 621.438 47.1967   5
  -2  -3  -5 634.643 48.3380   3
  -2  -3  -5 669.594 47.3399   1
   2   3   5 720.024 46.8109   1
  -2   3  -5 712.851 49.1248   5
  -2   3  -5 705.395 49.2350   1
   2   3   5 732.564 47.0118   1
  -2   3  -5 732.476 46.9779   4
  -2   3  -5 723.719 49.3535   1
  -3  -3  -5 123.114 13.7507   3
  -3  -3  -5 111.763 15.5246   4
  -3  -3  -5 106.336 13.2851   5
  -3   3  -5 119.302 9.03757   2
  -3   3  -5 104.430 13.2055   1
  -3   3  -5 120.472 10.6713   4
  -3   3  -5 126.160 13.7004   1
  -3   3  -5 121.713 15.8722   5
  -4  -3  -5 34.6369 10.5398   4
  -4  -3  -5 36.8216 10.1200   3
  -4  -3  -5 37.0230 10.4424   5
  -4  -3  -5 27.6992 10.8391   2
  -4   3  -5 40.2598 14.0517   5
  -4   3  -5 43.4037 9.03767   1
  -5  -3  -5 57.6234 13.2193   3
  -5  -3  -5 63.5467 14.3122   5
  -5  -3  -5 75.7421 14.6248   4
  -5  -3  -5 70.7978 15.4099   2
  -5   3  -5 42.0466 17.0432   5
  -5   3  -5 57.5308 9.95063   1
  -5  -4   5 30.6016 14.7336   2
  -5  -4   5 24.6532 10.7537   4
  -5   4   5 34.2832 14.8909   5
  -5   4   5 22.8064 10.5189   1
  -5   4   5 24.8021 12.1157   2
  -4  -4   5 103.439 18.7322   2
  -4  -4   5 104.768 16.7355   4
  -4   4   5 131.651 17.4108   1
  -4   4   5 129.783 16.6946   2
  -4   4   5 136.969 20.7616   5
  -3  -4   5 231.169 24.5855   2
  -3  -4   5 263.826 23.3510   4
   3  -4  -5 256.730 23.5819   1
  -3  -4   5 235.883 20.6161   1
  -3   4   5 247.797 23.8219   1
  -3   4   5 245.312 22.3640   2
  -3   4   5 264.468 23.9011   1
   3   4  -5 252.490 20.9591   1
  -3   4   5 247.547 25.3701   5
   2  -4  -5 193.051 19.4581   3
  -2  -4   5 191.546 19.0738   4
  -2  -4   5 191.775 20.6421   2
   2  -4  -5 186.375 19.9655   1
   2  -4  -5 210.197 14.9118   4
  -2  -4   5 189.979 18.0736   1
   2   4  -5 234.242 18.7885   1
  -2   4   5 205.208 19.6042   5
  -2   4   5 215.780 20.7761   1
  -2   4   5 243.476 20.9019   1
  -2   4   5 208.050 18.3447   2
  -1  -4   5 416.369 34.7620   4
  -1  -4   5 478.318 33.9530   5
   1  -4  -5 445.742 36.5084   1
   1  -4  -5 435.616 35.5989   3
   1  -4  -5 435.628 34.8606   2
  -1  -4   5 438.196 35.8116   2
  -1   4   5 558.289 37.5441   1
  -1   4   5 543.781 35.8424   2
  -1   4   5 527.185 37.0518   1
   1   4  -5 536.852 32.4665   3
  -1   4   5 511.487 34.1698   5
   1   4  -5 424.009 34.4137   5
   1   4  -5 523.656 36.1911   1
   0  -4   5 318.134 23.9094   4
   0  -4  -5 301.165 23.9398   3
   0  -4   5 322.631 22.9007   5
   0  -4  -5 310.637 25.4404   1
   0  -4   5 302.840 24.9583   1
   0  -4   5 318.696 23.7931   2
   0   4   5 329.158 25.5248   1
   0   4   5 320.262 23.9464   3
   0   4  -5 307.057 25.3574   1
   0   4  -5 318.262 25.3427   1
   0   4   5 321.999 21.0823   5
   0   4  -5 303.599 23.8501   4
   0   4  -5 304.526 23.2087   3
   0   4  -5 298.433 23.2189   5
   0   4   5 292.701 24.9721   1
   1  -4   5 897.132 63.8035   4
  -1  -4  -5 895.003 65.3583   1
  -1  -4  -5 872.269 64.6253   3
  -1  -4  -5 934.878 61.6955   5
   1  -4   5 872.103 62.3174   2
  -1   4  -5 1030.94 64.2463   4
  -1   4  -5 1030.23 64.6043   5
  -1   4  -5 988.519 66.3460   1
   1   4   5 984.524 65.1027   1
  -1   4  -5 991.456 66.6635   1
   1   4   5 1011.27 65.2624   3
  -2  -4  -5 447.367 32.0907   3
  -2  -4  -5 432.448 31.5038   1
  -2  -4  -5 384.003 29.2356   5
   2   4   5 430.809 30.6027   1
  -2   4  -5 427.779 33.5212   1
  -2   4  -5 449.345 33.3746   1
  -2   4  -5 428.395 30.1774   4
  -2   4  -5 479.722 32.9587   5
  -3  -4  -5 165.580 18.5333   4
  -3  -4  -5 145.772 16.1854   5
  -3  -4  -5 152.507 16.9130   3
  -3   4  -5 195.412 18.6022   1
   3   4   5 183.575 12.4772   1
  -3   4  -5 176.799 20.7064   5
  -3   4  -5 187.592 18.3728   1
  -3   4  -5 166.774 13.7794   4
  -4  -4  -5 29.2047 9.30193   3
  -4  -4  -5 33.5260 9.76386   5
  -4  -4  -5 40.2235 12.0509   4
  -4   4  -5 37.2213 14.6085   5
  -4   4  -5 11.3378 7.50621   1
  -5  -4  -5 19.3760 12.4520   2
  -5  -4  -5 30.3529 10.4969   3
  -5  -4  -5 22.6627 11.9310   4
  -5   4  -5 1.26057 13.9007   5
  -5   4  -5 17.7166 8.54956   1
  -5  -5   5 46.0328 13.4964   4
  -5  -5   5 12.8691 12.9820   2
  -5   5   5 18.7181 10.9296   1
  -5   5   5 15.7235 15.5814   5
  -5   5   5 27.7214 14.0298   2
  -4  -5   5 82.3802 14.9321   4
  -4  -5   5 130.623 21.5420   2
  -4   5   5 84.2506 18.7534   5
  -4   5   5 61.1585 13.8838   1
  -4   5   5 85.6659 14.5930   2
   3  -5  -5 66.3813 12.9343   1
  -3  -5   5 50.2990 13.3355   2
  -3  -5   5 67.7651 11.6878   1
  -3  -5   5 61.1018 12.2912   4
  -3   5   5 42.8356 12.5060   5
   3   5  -5 42.3764 8.83551   1
  -3   5   5 55.1488 12.7715   1
  -3   5   5 32.4854 10.2836   2
  -3   5   5 67.0335 13.5683   1
   2  -5  -5 62.7938 7.52791   4
   2  -5  -5 81.9678 13.7693   1
  -2  -5   5 76.8113 13.6176   2
  -2  -5   5 64.8630 11.3234   1
  -2  -5   5 79.7909 11.9488   4
   2  -5  -5 66.0608 7.45514   4
   2  -5  -5 65.1550 13.2766   3
   2   5  -5 93.5169 12.1491   1
  -2   5   5 97.0239 12.9529   5
  -2   5   5 76.9586 12.7431   2
  -2   5   5 115.385 15.0602   1
   1  -5  -5 78.1581 12.3984   3
  -1  -5   5 89.1487 12.2890   4
   1  -5  -5 119.975 14.9644   1
  -1  -5   5 96.0724 12.3700   1
  -1  -5   5 101.429 13.5252   2
   1   5  -5 87.1259 8.16643   3
   1   5  -5 83.3580 12.3882   1
  -1   5   5 85.1265 13.7298   1
   1   5  -5 81.4675 11.9016   5
  -1   5   5 84.7931 10.1365   5
   0  -5   5 410.088 34.0230   4
   0  -5  -5 439.794 36.2114   1
   0  -5   5 411.565 35.5336   1
   0  -5  -5 393.484 34.4094   3
   0   5  -5 502.894 33.9690   3
   0   5   5 499.550 31.6329   5
   0   5  -5 522.187 36.3418   4
   0   5  -5 517.428 34.5202   5
   0   5   5 480.404 36.2998   1
   0   5  -5 497.510 36.6287   1
   1  -5   5 206.621 15.1244   2
   1  -5   5 210.548 16.7268   4
  -1  -5  -5 200.749 17.7339   3
  -1  -5  -5 192.020 19.0076   1
  -1  -5  -5 189.853 13.8050   5
  -1   5  -5 189.260 19.9030   1
   1   5   5 203.534 18.5313   1
  -1   5  -5 197.614 16.5804   4
  -1   5  -5 193.168 19.4068   1
  -1   5  -5 192.728 17.1774   5
  -2  -5  -5 475.339 35.1443   3
  -2  -5  -5 463.188 36.8969   4
   2  -5   5 448.303 33.2192   4
  -2  -5  -5 480.493 32.0291   5
  -2  -5  -5 416.688 34.6274   1
  -2   5  -5 504.956 37.6607   1
   2   5   5 486.611 34.5477   1
  -2   5  -5 480.258 33.2841   4
  -2   5  -5 484.856 35.7667   5
  -2   5  -5 511.323 38.1288   1
  -3  -5  -5 45.2071 9.61469   3
  -3  -5  -5 39.5540 8.21307   5
  -3  -5  -5 37.9174 11.6721   4
  -3   5  -5 43.0968 10.6583   1
  -3   5  -5 36.0352 11.4416   5
  -4  -5  -5 70.5277 11.9703   3
  -4  -5  -5 49.6409 13.8566   4
  -4   5  -5 85.7774 14.1537   1
  -4   5  -5 69.3775 17.4567   5
  -5  -5  -5 17.3423 14.3124   2
  -5  -5  -5 37.9343 14.0159   4
  -5   5  -5 30.0013 10.4759   1
  -5  -6   5 52.6123 14.7171   4
  -5   6   5 53.2088 19.0117   5
  -4  -6   5 12.6697 10.9474   4
  -4  -6   5 -4.8463 10.4075   2
  -4   6   5 2.13749 10.0263   1
  -4   6   5 4.73175 13.6947   5
  -4   6   5 11.2156 10.9725   2
  -3  -6   5 162.259 20.5443   4
  -3  -6   5 185.421 23.8342   2
   3  -6  -5 156.423 21.4429   1
  -3   6   5 168.830 19.5690   2
  -3   6   5 177.654 21.7454   5
  -3   6   5 190.757 22.8419   1
  -2  -6   5 110.829 16.9365   4
   2  -6  -5 143.043 12.3558   4
  -2  -6   5 143.437 16.4638   1
   2  -6  -5 158.135 18.8188   3
  -2  -6   5 147.602 18.5652   2
   2  -6  -5 164.019 19.6407   1
   2   6  -5 142.498 11.0758   3
   2   6  -5 144.242 16.6606   1
  -2   6   5 130.234 16.0827   5
  -2   6   5 139.656 19.6128   1
  -1  -6   5 394.220 33.0275   1
  -1  -6   5 385.224 32.4356   4
   1  -6  -5 358.571 30.5796   5
   1  -6  -5 343.775 34.1167   1
   1  -6  -5 400.617 30.5487   4
   1  -6  -5 384.077 33.0671   3
   1   6  -5 352.700 31.2010   5
  -1   6   5 502.216 30.4692   5
   1   6  -5 468.850 34.2716   1
  -1   6   5 483.597 35.8074   1
   1   6  -5 472.958 29.4367   3
   0  -6  -5 39.1112 10.2945   1
   0  -6  -5 30.0992 5.77258   5
   0  -6   5 37.6104 8.13504   4
   0  -6  -5 23.5811 7.91707   4
   0  -6  -5 40.7780 9.78115   3
   0   6  -5 26.8998 9.29327   1
   0   6  -5 35.2344 9.17272   5
   0   6   5 46.3063 10.6727   1
   0   6  -5 44.8653 7.58342   3
   0   6   5 36.3245 6.33203   5
  -1  -6  -5 324.476 27.4332   4
  -1  -6  -5 305.347 26.2150   3
  -1  -6  -5 308.319 27.6591   1
   1  -6   5 307.826 23.6749   2
  -1  -6  -5 291.365 22.3423   5
   1  -6   5 312.867 25.0827   4
  -1   6  -5 362.782 25.6884   4
   1   6   5 397.444 28.1286   1
  -1   6  -5 337.426 29.2873   1
  -1   6  -5 355.399 26.4488   5
  -2  -6  -5 127.444 18.9135   4
  -2  -6  -5 173.927 17.6604   1
  -2  -6  -5 166.525 14.1520   5
   2  -6   5 154.511 14.7631   4
  -2  -6  -5 165.977 17.1075   3
  -2   6  -5 195.613 15.2221   4
  -2   6  -5 148.823 17.6410   5
  -2   6  -5 189.879 21.1027   1
   2   6   5 192.585 16.9238   1
  -3  -6  -5 139.608 15.5039   3
  -3  -6  -5 101.848 17.4878   4
  -3   6  -5 134.100 18.7603   1
  -3   6  -5 100.823 19.0356   5
  -4  -6  -5 20.9821 8.74456   3
  -4  -6  -5 1.66214 10.3717   4
  -4   6  -5 5.61392 13.7891   5
  -4   6  -5 9.13377 9.87983   1
  -4  -7   5 31.1178 16.3955   2
  -4  -7   5 37.6364 13.1227   4
  -4   7   5 18.5454 12.5280   2
  -4   7   5 46.5055 14.5332   1
  -4   7   5 19.2505 14.9472   5
   3  -7  -5 66.9912 14.5116   1
  -3  -7   5 115.462 19.3767   2
  -3  -7   5 100.436 16.2450   4
  -3   7   5 59.5434 15.2306   1
  -3   7   5 78.7407 14.8533   5
  -2  -7   5 130.113 17.4402   4
   2  -7  -5 151.484 13.2186   4
   2  -7  -5 142.965 20.7859   1
  -2  -7   5 137.950 20.7375   2
  -2   7   5 141.972 21.7500   1
  -2   7   5 140.876 17.0549   5
   2   7  -5 161.898 18.6211   1
   1  -7  -5 78.1054 11.4018   4
   1  -7  -5 60.9182 12.8051   3
  -1  -7   5 57.3582 11.5718   4
   1  -7  -5 100.250 16.2205   1
   1   7  -5 65.2489 8.25287   3
  -1   7   5 63.2673 13.9869   1
   1   7  -5 75.1028 13.4389   1
   1   7  -5 57.4146 12.3153   5
  -1   7   5 69.3009 10.5888   5
   0  -7  -5 82.0523 10.0142   5
   0  -7  -5 87.0243 13.6014   4
   0  -7   5 97.6093 13.5193   4
   0  -7  -5 96.7612 15.4447   1
   0  -7  -5 83.4007 14.0772   3
   0   7   5 72.8848 13.7374   1
   0   7  -5 73.9108 13.1355   5
   0   7  -5 71.2525 14.2464   1
   0   7   5 95.3869 9.78505   5
  -1  -7  -5 83.6987 13.8709   3
   1  -7   5 114.339 12.5667   2
   1  -7   5 97.1456 13.5743   4
  -1  -7  -5 104.744 16.2389   1
  -1  -7  -5 109.847 16.1871   4
   1   7   5 118.606 15.9340   1
  -1   7  -5 118.873 18.7382   1
  -1   7  -5 123.615 14.7868   5
  -2  -7  -5 91.8250 13.8058   3
  -2  -7  -5 78.0039 14.9028   4
   2  -7   5 95.4123 11.4107   4
  -2  -7  -5 94.7936 14.3195   1
  -2   7  -5 97.1953 15.2009   5
  -2   7  -5 128.949 19.5235   1
  -3  -7  -5 35.3378 9.62177   3
  -3  -7  -5 27.6434 11.2059   4
  -3   7  -5 32.8366 12.2035   1
  -3   7  -5 10.2695 12.9006   5
  -4  -7  -5 46.0987 15.2093   4
  -4   7  -5 40.4388 16.4537   5
  -4   7  -5 68.8263 15.9917   1
  -4   8   5 9.86606 14.1726   5
  -3  -8   5 51.5551 13.0688   4
   3  -8  -5 57.4871 14.6553   1
  -3  -8   5 74.5647 18.7368   2
  -3   8   5 66.8389 16.4789   1
  -3   8   5 40.6267 13.2272   5
  -2  -8   5 29.9246 13.7782   2
  -2  -8   5 15.9980 10.4068   4
   2  -8  -5 33.0868 12.1472   1
  -2   8   5 13.6087 9.38455   5
  -2   8   5 16.0605 11.9438   1
  -1  -8   5 175.258 19.9921   4
   1  -8  -5 186.686 23.0839   1
   1  -8  -5 170.112 17.4429   4
   1  -8  -5 177.633 22.0032   3
  -1   8   5 180.297 16.6305   5
   1   8  -5 162.136 21.7152   1
  -1   8   5 175.725 23.3089   1
   1   8  -5 150.575 19.1423   5
   0  -8   5 178.585 18.3940   4
   0  -8  -5 165.679 21.7042   1
   0  -8  -5 171.604 19.2057   4
   0  -8  -5 192.749 20.3602   3
   0   8   5 140.872 21.4465   1
   0   8  -5 179.594 22.9533   1
   0   8   5 166.462 14.7844   5
   0   8  -5 152.810 18.1465   5
  -1  -8  -5 26.8377 11.3183   4
  -1  -8  -5 37.6417 10.8030   3
   1  -8   5 30.9631 9.15200   4
  -1  -8  -5 49.9457 12.4675   1
  -1   8  -5 11.3441 10.6883   1
  -1   8  -5 21.1225 11.7975   5
  -2  -8  -5 79.6765 13.5055   3
  -2  -8  -5 86.9928 15.0776   1
  -2  -8  -5 87.5836 16.2756   4
  -2   8  -5 82.7964 16.7695   1
  -2   8  -5 67.4268 13.9458   5
  -3  -8  -5 136.726 21.1220   4
  -3  -8  -5 98.8163 15.6455   3
  -3   8  -5 62.9074 17.1856   1
  -3   8  -5 69.6020 16.9111   5
  -3  -9   5 62.2527 15.9138   4
  -3  -9   5 61.1916 18.2446   2
  -3   9   5 18.4917 12.7917   5
  -3   9   5 81.1288 18.8536   1
   2  -9  -5 36.1422 14.4803   1
  -2  -9   5 26.6060 11.8668   4
  -2  -9   5 38.2219 15.3684   2
  -2   9   5 34.1092 15.8926   1
  -2   9   5 13.2862 10.6741   5
   1  -9  -5 3.29662 7.25733   4
   1  -9  -5 13.2626 11.9066   3
  -1  -9   5 8.71678 9.45205   4
   1  -9  -5 7.70314 12.2105   1
   1   9  -5 11.0578 10.1576   5
  -1   9   5 25.8793 12.6289   1
   1   9  -5 7.48917 9.99441   1
   0  -9   5 31.4708 10.2430   4
   0  -9  -5 19.0663 9.74250   4
   0  -9  -5 19.5372 12.8024   1
   0  -9  -5 19.1381 11.4388   3
   0   9   5 27.1152 11.5967   1
   0   9  -5 28.0816 11.5761   5
   0   9  -5 32.7995 13.3097   1
   1  -9   5 54.1338 11.0873   4
  -1  -9  -5 76.7308 15.5388   1
  -1  -9  -5 44.3636 12.8221   4
  -1  -9  -5 52.0162 12.9794   3
  -1   9  -5 68.3601 17.0820   1
  -1   9  -5 43.3393 12.4420   5
  -2  -9  -5 54.9886 12.6563   3
  -2  -9  -5 31.5728 13.5534   4
  -2  -9  -5 33.1280 12.6008   1
  -2   9  -5 27.2662 14.4791   1
  -2   9  -5 33.8799 14.1481   5
  -2 -10   5 -16.594 11.8326   2
   2 -10  -5 -4.0421 12.7436   1
  -2 -10   5 -13.372 9.00929   4
  -2  10   5 2.49935 14.7576   1
   1 -10  -5 48.4674 16.9751   1
   1 -10  -5 34.2436 15.2647   3
  -1 -10   5 35.0944 14.7850   2
  -1 -10   5 40.5784 13.0770   4
   1  10  -5 42.4460 12.4800   5
  -1  10   5 23.5828 15.2244   1
   0 -10  -5 1.77091 8.68930   4
   0 -10   5 -8.4258 8.45068   4
   0 -10  -5 9.42913 11.8020   1
   0 -10  -5 -6.9247 10.3365   3
   0  10  -5 10.3966 13.6482   1
   0  10  -5 31.7436 12.6878   5
  -1 -10  -5 4.06490 11.4371   1
  -1 -10  -5 -6.1875 9.94545   3
  -1 -10  -5 -2.6154 9.30985   4
  -1  10  -5 -15.395 12.1285   1
  -1  10  -5 13.8872 12.4578   5
  -6   0   6 60.4711 16.2968   2
  -6   0   6 51.6065 8.86880   1
  -5   0   6 7.30626 10.7121   2
  -5   0   6 0.24589 6.17711   4
  -4   0   6 35.0428 7.35296   4
  -4   0   6 44.0674 12.0713   2
  -4   0   6 26.3886 6.83698   1
  -3   0   6 0.57647 4.19007   1
  -3   0   6 -0.1800 3.89611   3
  -3   0   6 10.3276 7.65384   2
  -3   0   6 1.52740 4.26154   4
   3   0  -6 -3.3039 4.15332   1
   3   0  -6 8.98775 4.89182   4
   2   0  -6 686.202 47.7303   1
   2   0  -6 693.034 48.5843   2
   2   0  -6 690.775 46.6527   4
  -2   0   6 686.543 45.9252   3
  -2   0   6 684.453 46.5148   4
  -2   0   6 666.554 47.6147   1
  -2   0   6 661.017 48.5493   2
   1   0  -6 488.570 33.3419   4
   1   0  -6 483.572 34.3860   2
  -1   0   6 465.604 34.3490   1
  -1   0   6 489.976 32.5619   3
   1   0  -6 472.083 34.3753   1
   1   0  -6 479.577 32.6917   3
  -1   0   6 466.202 34.2696   2
  -1   0   6 500.300 33.4969   4
   0   0   6 879.141 53.4542   5
   0   0  -6 769.020 54.1143   3
   0   0  -6 795.410 55.0849   1
   0   0   6 845.881 54.4141   3
   0   0   6 759.293 54.4272   4
   0   0  -6 765.369 53.5965   5
   0   0  -6 800.266 54.3413   4
   0   0   6 805.270 55.0850   1
   0   0  -6 847.368 54.3365   2
   0   0   6 833.182 54.2132   2
   1   0   6 229.348 18.4351   5
  -1   0  -6 269.945 18.0930   2
  -1   0  -6 252.919 19.1285   1
  -1   0  -6 231.787 19.3159   3
   1   0   6 256.672 19.0200   1
  -1   0  -6 258.438 17.9075   5
   2   0   6 492.379 40.1339   5
  -2   0  -6 589.438 40.1359   5
   2   0   6 591.608 38.7261   1
  -2   0  -6 569.322 41.0776   3
  -2   0  -6 598.343 39.2316   1
  -3   0  -6 71.0045 7.37808   1
  -3   0  -6 92.7729 13.7734   3
  -3   0  -6 74.9123 7.87156   1
  -3   0  -6 78.5216 10.6396   2
  -3   0  -6 74.1069 11.9480   5
  -4   0  -6 166.062 20.3737   3
  -4   0  -6 173.461 20.0943   5
  -4   0  -6 171.116 18.0019   2
  -5   0  -6 -4.4377 10.2805   5
  -5   0  -6 12.8739 8.49915   4
  -5   0  -6 -3.0194 9.91176   3
  -6  -1   6 2.36992 13.4971   2
  -6   1   6 22.6556 13.5994   2
  -5  -1   6 103.996 18.0641   2
  -5  -1   6 95.6453 13.5253   4
  -5   1   6 80.1134 15.5373   2
  -5   1   6 75.7693 12.7114   1
  -5   1   6 60.4327 17.0757   5
   4  -1  -6 91.4747 12.1945   1
   4  -1  -6 90.2989 10.8850   4
  -4  -1   6 103.761 12.6540   4
  -4  -1   6 90.7180 11.5370   1
  -4  -1   6 101.359 17.6934   2
  -4  -1   6 100.936 11.1657   3
  -4   1   6 77.5243 12.1493   1
   4   1  -6 88.5422 13.2855   1
  -4   1   6 106.880 16.4332   2
  -4   1   6 101.637 10.3581   4
  -3  -1   6 418.403 35.1854   2
  -3  -1   6 448.517 32.6450   1
  -3  -1   6 434.134 32.3242   4
   3  -1  -6 419.643 32.9474   1
  -3  -1   6 464.967 31.0830   3
   3  -1  -6 459.881 31.4147   4
  -3   1   6 439.697 33.2956   1
  -3   1   6 467.902 34.8878   2
   3   1  -6 419.932 32.3835   1
  -3   1   6 430.905 30.9318   4
  -3   1   6 454.157 32.4177   3
   3   1  -6 429.066 32.8033   4
   2  -1  -6 925.382 66.6831   1
   2  -1  -6 985.800 64.8863   4
  -2  -1   6 959.803 67.5107   2
   2  -1  -6 963.175 67.1102   2
   2  -1  -6 936.070 65.7541   3
  -2  -1   6 944.075 65.7205   4
  -2  -1   6 915.285 66.1054   1
  -2  -1   6 981.759 63.9315   3
  -2   1   6 1014.81 65.4703   3
  -2   1   6 1030.16 64.8664   4
   2   1  -6 1008.52 65.9230   4
   2   1  -6 964.678 66.3103   1
  -2   1   6 1017.20 66.9227   1
   2   1  -6 1018.40 67.7057   2
  -2   1   6 928.808 66.7174   2
  -1  -1   6 1628.20 107.137   2
  -1  -1   6 1599.21 107.010   1
   1  -1  -6 1679.10 105.871   4
  -1  -1   6 1590.03 104.861   3
   1  -1  -6 1608.46 107.356   1
  -1  -1   6 1440.30 105.953   5
   1  -1  -6 1582.34 106.024   3
   1  -1  -6 1608.11 106.943   2
  -1  -1   6 1587.59 106.311   4
   1   1  -6 1617.38 104.851   3
  -1   1   6 1685.22 105.965   4
   1   1  -6 1606.78 107.039   2
   1   1  -6 1524.60 106.940   1
   1   1  -6 1701.71 106.499   4
  -1   1   6 1619.51 106.862   2
  -1   1   6 1708.18 106.000   3
  -1   1   6 1640.18 107.349   1
   0  -1   6 527.787 37.6033   4
   0  -1   6 592.224 36.8124   5
   0  -1   6 534.153 37.0683   2
   0  -1   6 560.791 38.4976   1
   0  -1  -6 573.252 37.6753   2
   0  -1  -6 543.871 37.5604   4
   0  -1  -6 533.451 38.3294   1
   0  -1  -6 534.091 37.5646   3
   0   1  -6 512.438 38.3242   1
   0   1  -6 557.145 37.2653   2
   0   1  -6 513.313 37.0870   3
   0   1  -6 520.073 37.0042   5
   0   1   6 558.572 38.3990   1
   0   1   6 544.972 36.0575   5
   0   1   6 558.082 37.5818   3
   0   1   6 559.331 37.6472   2
   0   1  -6 561.059 37.4820   4
  -1  -1  -6 1488.85 90.9512   2
  -1  -1  -6 1292.90 91.0085   1
  -1  -1  -6 1288.81 91.3872   3
   1  -1   6 1298.59 91.0068   5
  -1  -1  -6 1461.57 89.7237   5
   1  -1   6 1359.49 91.2923   1
  -1   1  -6 1424.80 91.0190   4
   1   1   6 1229.91 90.1056   5
  -1   1  -6 1475.58 89.6334   2
   1   1   6 1334.93 90.8966   1
  -1   1  -6 1319.74 91.4445   1
   1   1   6 1390.15 91.7375   3
  -1   1  -6 1494.13 90.6118   5
  -2  -1  -6 535.705 37.1746   5
   2  -1   6 447.893 38.0390   5
  -2  -1  -6 521.751 36.2089   1
  -2  -1  -6 552.199 38.6112   3
   2  -1   6 523.968 36.7225   1
  -2   1  -6 550.173 37.9602   5
  -2   1  -6 555.030 37.3619   4
  -2   1  -6 551.720 37.3912   1
   2   1   6 531.807 35.7603   1
  -3  -1  -6 599.923 44.3708   3
  -3  -1  -6 602.513 43.9230   5
  -3  -1  -6 589.398 40.0175   1
  -3   1  -6 582.357 44.3146   5
  -3   1  -6 624.279 42.0859   1
  -3   1  -6 599.331 41.6907   1
  -3   1  -6 621.792 42.0889   2
  -4  -1  -6 37.9580 10.5528   5
  -4  -1  -6 52.4320 11.2566   2
  -4  -1  -6 72.2793 12.9581   3
  -4   1  -6 48.6471 7.18083   1
  -4   1  -6 38.9545 8.49608   2
  -4   1  -6 47.8565 11.9040   5
  -5  -1  -6 10.4856 10.5404   5
  -5  -1  -6 16.0966 10.9613   3
  -5  -1  -6 7.97903 8.53238   4
  -5  -1  -6 -6.7460 8.20472   2
  -5   1  -6 14.6672 12.0475   5
  -5   1  -6 7.86494 12.1723   3
  -5  -2   6 62.6270 15.8777   2
  -5  -2   6 59.8629 11.5017   4
  -5   2   6 40.5452 15.0829   5
  -5   2   6 34.0983 9.94807   1
  -5   2   6 34.8444 12.2485   2
  -4  -2   6 137.367 17.1222   1
   4  -2  -6 135.827 15.4878   1
  -4  -2   6 149.219 16.2686   4
  -4  -2   6 108.715 18.6188   2
  -4   2   6 143.354 11.8618   4
  -4   2   6 133.396 17.7379   2
  -4   2   6 131.267 19.8325   5
  -3  -2   6 130.959 14.1879   1
  -3  -2   6 140.136 17.3530   2
   3  -2  -6 139.523 12.3919   4
  -3  -2   6 137.856 15.0772   4
   3  -2  -6 147.576 15.8966   1
  -3  -2   6 139.933 11.6798   3
  -3   2   6 161.358 16.9387   2
   3   2  -6 181.835 14.8142   1
  -3   2   6 177.610 16.6163   1
  -3   2   6 173.381 12.4591   4
  -2  -2   6 917.346 68.6454   4
   2  -2  -6 994.855 69.1784   3
  -2  -2   6 975.606 68.9243   1
   2  -2  -6 1015.43 69.9402   2
   2  -2  -6 1010.67 67.0782   4
   2  -2  -6 983.217 69.7916   1
  -2  -2   6 947.912 70.3124   2
  -2   2   6 1002.04 69.3788   2
  -2   2   6 1078.41 70.2661   1
   2   2  -6 1021.99 69.1911   1
   2   2  -6 1053.34 69.3217   4
   2   2  -6 1089.00 72.9410   2
  -2   2   6 1078.39 68.8433   3
  -2   2   6 1044.49 67.1785   4
  -1  -2   6 972.772 68.3350   1
  -1  -2   6 951.628 67.2828   5
  -1  -2   6 983.767 67.8357   4
  -1  -2   6 1016.30 68.5946   2
   1  -2  -6 1034.47 66.9575   4
   1  -2  -6 972.600 68.9527   1
   1  -2  -6 1023.68 68.3195   2
   1  -2  -6 953.471 67.8099   3
  -1   2   6 1080.56 67.7399   3
  -1   2   6 960.205 68.0404   2
   1   2  -6 1036.47 68.0356   4
   1   2  -6 1035.04 65.5246   3
   1   2  -6 1029.92 68.5786   2
   1   2  -6 1005.22 68.5536   1
  -1   2   6 1055.56 69.1241   1
   0  -2   6 1483.34 98.9240   2
   0  -2  -6 1485.91 100.480   1
   0  -2  -6 1439.70 99.4113   3
   0  -2   6 1572.35 99.5857   4
   0  -2   6 1546.06 98.7089   5
   0  -2  -6 1581.88 99.7789   2
   0  -2   6 1480.77 100.240   1
   0   2  -6 1504.31 98.9676   5
   0   2   6 1522.67 99.8176   2
   0   2  -6 1554.79 99.0221   2
   0   2  -6 1507.06 100.586   1
   0   2   6 1474.13 100.213   1
   0   2   6 1395.11 97.4396   5
   0   2   6 1514.41 99.5651   3
   0   2  -6 1528.35 99.4215   4
  -1  -2  -6 737.246 52.0279   1
   1  -2   6 680.864 51.8394   5
   1  -2   6 734.986 52.3571   1
  -1  -2  -6 744.047 52.1851   3
  -1  -2  -6 794.276 49.6130   5
  -1  -2  -6 748.809 51.8364   2
   1  -2   6 720.619 51.6144   4
  -1   2  -6 760.015 52.7160   1
   1   2   6 789.307 51.8679   1
   1   2   6 780.085 52.4825   3
  -1   2  -6 782.953 51.3891   4
  -1   2  -6 836.025 51.6462   5
  -2  -2  -6 350.914 23.2770   1
  -2  -2  -6 352.938 23.6860   5
  -2  -2  -6 350.276 25.2167   3
  -2   2  -6 290.043 24.3636   1
  -2   2  -6 304.596 23.3173   4
  -2   2  -6 309.188 24.5392   1
  -2   2  -6 291.576 24.4930   5
   2   2   6 303.263 22.4962   1
  -3  -2  -6 45.6009 9.90950   3
  -3  -2  -6 30.9930 8.48672   5
  -3   2  -6 59.3991 8.67794   1
  -3   2  -6 67.2334 11.9798   5
  -3   2  -6 53.4051 6.59470   2
  -3   2  -6 54.9092 8.58297   1
  -3   2  -6 58.6198 8.21417   4
  -4  -2  -6 374.344 31.1649   3
  -4  -2  -6 321.715 30.5968   4
  -4  -2  -6 358.653 30.9409   5
  -4  -2  -6 377.948 32.0542   2
  -4   2  -6 412.501 34.0965   5
  -4   2  -6 376.815 28.3339   1
  -5  -2  -6 43.9064 12.6415   2
  -5  -2  -6 51.3400 12.6175   3
  -5  -2  -6 57.5713 13.0331   4
  -5  -2  -6 43.4654 12.4540   5
  -5   2  -6 50.0715 15.9897   5
  -5   2  -6 40.4002 7.60187   1
  -5  -3   6 43.7446 10.8599   4
  -5  -3   6 42.2265 15.0805   2
  -5   3   6 37.7209 12.9299   2
  -5   3   6 7.92895 13.1998   5
  -5   3   6 19.2467 9.49018   1
  -4  -3   6 262.381 19.2954   3
  -4  -3   6 273.241 28.3757   2
  -4  -3   6 274.243 24.1405   4
  -4   3   6 261.834 24.4782   1
  -4   3   6 229.516 28.2661   5
  -4   3   6 237.192 24.6074   2
  -3  -3   6 439.452 32.9659   4
   3  -3  -6 421.666 33.3612   1
  -3  -3   6 434.490 31.6430   1
  -3  -3   6 459.067 35.6475   2
   3  -3  -6 451.035 28.5348   4
   3   3  -6 412.600 31.3188   1
  -3   3   6 363.763 34.6864   5
  -3   3   6 383.159 32.9942   1
  -3   3   6 379.810 32.6283   2
   2  -3  -6 390.712 29.5321   1
  -2  -3   6 379.020 28.1511   1
  -2  -3   6 383.451 29.8543   2
   2  -3  -6 386.781 25.3508   4
   2  -3  -6 371.340 28.5800   3
  -2  -3   6 379.662 28.4749   4
  -2   3   6 332.228 28.1137   2
  -2   3   6 329.223 29.1004   1
   2   3  -6 361.745 28.1011   1
  -2   3   6 335.425 29.0880   5
  -1  -3   6 1475.01 99.6137   4
  -1  -3   6 1555.89 100.477   2
  -1  -3   6 1549.01 98.8725   5
   1  -3  -6 1503.42 100.933   1
   1  -3  -6 1470.68 99.8165   3
  -1  -3   6 1485.84 100.075   1
   1  -3  -6 1568.64 100.025   2
  -1   3   6 1520.88 100.947   1
   1   3  -6 1512.13 96.9806   3
   1   3  -6 1239.11 98.9222   5
   1   3  -6 1530.64 100.560   1
  -1   3   6 1554.60 99.5318   3
  -1   3   6 1541.08 99.8451   2
  -1   3   6 1410.15 98.8832   5
   1   3  -6 1503.87 99.6534   4
   0  -3   6 281.002 22.1429   2
   0  -3  -6 328.271 23.1996   2
   0  -3  -6 291.840 23.9926   1
   0  -3   6 307.120 22.9026   4
   0  -3   6 308.380 23.9812   1
   0  -3   6 304.973 21.8764   5
   0  -3  -6 297.443 22.9389   3
   0   3   6 322.152 23.1088   3
   0   3   6 300.089 20.0476   5
   0   3  -6 292.130 22.3075   5
   0   3   6 290.331 23.8861   1
   0   3  -6 308.456 24.3133   1
   0   3  -6 303.544 22.8056   4
   1  -3   6 867.786 66.4016   5
  -1  -3  -6 936.328 66.6378   3
   1  -3   6 976.193 65.9504   4
   1  -3   6 971.600 67.4259   1
  -1  -3  -6 961.779 66.8722   1
   1   3   6 1030.45 66.8160   1
  -1   3  -6 1072.53 66.2544   5
   1   3   6 1008.95 67.0735   3
  -1   3  -6 926.565 67.5569   1
  -1   3  -6 1069.75 66.0982   4
  -2  -3  -6 261.995 19.9157   3
  -2  -3  -6 213.049 17.1684   5
  -2  -3  -6 223.795 17.9261   1
   2   3   6 210.738 16.9878   1
  -2   3  -6 239.589 19.6598   5
  -2   3  -6 208.876 19.5977   1
  -2   3  -6 236.743 19.6251   1
  -2   3  -6 237.636 17.5319   4
  -3  -3  -6 405.485 31.8316   3
  -3  -3  -6 392.778 27.9701   1
  -3  -3  -6 391.669 30.8637   5
  -3   3  -6 428.461 31.8660   1
  -3   3  -6 447.014 34.1048   5
  -3   3  -6 412.631 29.3147   4
  -3   3  -6 410.417 31.6670   1
  -4  -3  -6 47.6200 10.9913   3
  -4  -3  -6 37.0062 11.3659   4
  -4  -3  -6 35.8083 10.1282   5
  -4  -3  -6 25.4577 11.4392   2
  -4   3  -6 36.7161 8.44513   1
  -4   3  -6 43.2276 14.1880   5
  -5  -3  -6 12.6635 10.3666   5
  -5  -3  -6 8.92063 9.92626   4
  -5  -3  -6 23.6656 11.9121   2
  -5  -3  -6 16.0150 10.3646   3
  -5   3  -6 18.1899 7.41933   1
  -5   3  -6 26.2048 14.3098   5
  -5  -4   6 39.0721 15.8180   2
  -5  -4   6 29.5912 11.0662   4
  -5   4   6 38.4696 13.1398   2
  -5   4   6 11.3182 16.0818   5
  -5   4   6 27.5673 10.9287   1
  -4  -4   6 193.019 21.5442   4
  -4  -4   6 221.357 25.8484   2
  -4   4   6 190.647 22.1462   2
  -4   4   6 228.834 25.5033   5
  -4   4   6 198.587 22.5442   1
  -3  -4   6 131.318 16.7757   4
  -3  -4   6 128.491 14.8793   1
  -3  -4   6 119.268 17.9552   2
   3  -4  -6 112.539 16.8952   1
  -3   4   6 153.549 18.7221   5
  -3   4   6 184.538 18.6275   1
   3   4  -6 154.950 15.3332   1
  -3   4   6 177.858 18.7497   1
  -3   4   6 156.657 17.3105   2
   2  -4  -6 326.335 27.7144   3
   2  -4  -6 324.197 23.0517   4
  -2  -4   6 325.911 28.0511   2
  -2  -4   6 313.817 26.1896   1
  -2  -4   6 312.400 26.7302   4
   2  -4  -6 309.138 27.9189   1
  -2   4   6 328.322 26.8034   2
  -2   4   6 321.561 27.0062   5
  -2   4   6 371.420 28.7579   1
   2   4  -6 366.646 26.8063   1
  -1  -4   6 472.809 32.1310   1
  -1  -4   6 406.228 31.0164   4
  -1  -4   6 462.507 32.1644   2
   1  -4  -6 431.193 31.7041   3
   1  -4  -6 464.144 33.1438   1
  -1   4   6 374.514 30.7077   2
   1   4  -6 323.123 29.9028   5
  -1   4   6 392.559 32.3573   1
   1   4  -6 413.156 27.8157   3
  -1   4   6 412.862 29.6980   5
   1   4  -6 431.798 32.0053   1
   0  -4  -6 544.211 40.4638   3
   0  -4   6 522.621 39.4956   2
   0  -4  -6 525.645 41.3301   1
   0  -4   6 525.507 39.8087   4
   0  -4   6 545.776 41.2600   1
   0   4  -6 583.359 41.8985   1
   0   4   6 599.502 37.0190   5
   0   4  -6 605.319 40.2681   4
   0   4   6 617.586 41.8080   1
   0   4  -6 559.257 39.5745   5
   1  -4   6 112.010 11.6869   4
  -1  -4  -6 107.442 12.9183   1
  -1  -4  -6 110.687 12.3342   3
   1  -4   6 110.846 9.27462   2
  -1   4  -6 132.253 12.2321   5
  -1   4  -6 114.438 13.4729   1
  -1   4  -6 100.322 13.7778   1
  -1   4  -6 117.959 11.4011   4
   1   4   6 117.571 12.8046   1
  -2  -4  -6 153.847 12.4829   5
  -2  -4  -6 172.121 15.6523   3
  -2  -4  -6 147.351 14.3018   1
   2   4   6 114.425 12.5190   1
  -2   4  -6 162.389 13.2415   4
  -2   4  -6 156.810 16.5251   1
  -2   4  -6 169.498 15.7961   5
  -2   4  -6 173.237 16.7912   1
  -3  -4  -6 91.4269 11.7868   5
  -3  -4  -6 89.4588 14.7480   4
  -3  -4  -6 90.5784 13.1986   3
  -3  -4  -6 103.106 10.0097   1
   3   4   6 99.4830 8.66075   1
  -3   4  -6 107.511 17.2980   5
  -3   4  -6 101.569 14.3750   1
  -3   4  -6 97.2409 9.95245   4
  -4  -4  -6 217.815 20.8568   5
  -4  -4  -6 222.216 23.8231   4
  -4  -4  -6 216.120 21.3634   3
  -4   4  -6 211.862 21.1256   1
  -4   4  -6 186.305 24.0929   5
  -5  -4  -6 27.3337 11.4922   4
  -5  -4  -6 35.7529 11.2175   3
  -5  -4  -6 15.1711 12.5826   2
  -5   4  -6 19.5142 8.64591   1
  -5   4  -6 -3.5843 15.2519   5
  -5  -5   6 -6.4678 9.37167   4
  -5  -5   6 -0.5011 12.4309   2
  -5   5   6 -6.4639 11.8534   2
  -5   5   6 5.48330 10.5330   1
  -5   5   6 7.00931 13.5761   5
  -4  -5   6 144.685 22.6409   2
  -4  -5   6 175.143 20.2187   4
  -4   5   6 121.954 20.0702   1
  -4   5   6 133.375 22.8257   5
  -4   5   6 115.068 19.2729   2
  -3  -5   6 244.083 23.2739   4
  -3  -5   6 264.880 26.3505   2
   3  -5  -6 260.367 24.2487   1
  -3   5   6 214.584 23.0261   5
  -3   5   6 205.285 23.7326   1
   3   5  -6 206.787 20.5897   1
  -3   5   6 212.815 22.1776   2
   2  -5  -6 230.296 22.8817   1
   2  -5  -6 214.784 22.2904   3
  -2  -5   6 215.905 20.2455   1
   2  -5  -6 223.214 16.6277   4
  -2  -5   6 199.378 20.7253   4
  -2  -5   6 183.656 21.2280   2
  -2   5   6 243.046 23.3009   1
   2   5  -6 249.741 21.3604   1
  -2   5   6 219.706 20.9823   2
  -2   5   6 210.331 20.2035   5
   1  -5  -6 421.070 32.6591   3
  -1  -5   6 399.688 32.7363   2
  -1  -5   6 397.695 32.5921   1
  -1  -5   6 384.288 31.8386   4
   1  -5  -6 423.649 34.0750   1
   1   5  -6 448.040 28.7256   3
   1   5  -6 424.960 33.0065   1
  -1   5   6 440.415 30.0530   5
   1   5  -6 338.001 31.1139   5
  -1   5   6 477.452 34.9130   1
   0  -5  -6 332.872 28.1215   1
   0  -5  -6 341.441 26.7894   3
   0  -5   6 330.430 25.8658   2
   0  -5   6 313.993 25.6056   4
   0   5  -6 334.549 25.5043   5
   0   5   6 303.797 27.5259   1
   0   5  -6 332.431 24.9204   3
   0   5   6 334.471 22.3344   5
   0   5  -6 324.827 27.9151   1
  -1  -5  -6 449.680 37.2985   3
  -1  -5  -6 448.855 38.0843   1
   1  -5   6 457.719 36.1315   4
   1  -5   6 479.671 34.6174   2
   1  -5   6 491.546 35.3095   2
  -1   5  -6 564.200 39.8539   1
  -1   5  -6 588.777 40.4630   1
  -1   5  -6 568.996 36.8950   4
  -1   5  -6 555.772 37.0704   5
   1   5   6 570.569 38.6273   1
  -2  -5  -6 158.959 11.3080   5
  -2  -5  -6 164.477 16.0950   3
  -2  -5  -6 149.326 17.2155   4
   2  -5   6 133.286 14.0275   4
  -2  -5  -6 143.910 15.4904   1
  -2  -5  -6 130.826 12.1031   5
  -2   5  -6 191.207 17.0562   5
  -2   5  -6 164.392 18.4552   1
  -2   5  -6 167.697 13.9984   4
   2   5   6 147.851 14.5670   1
  -2   5  -6 150.120 17.3414   1
  -3  -5  -6 215.975 18.5528   5
  -3  -5  -6 228.818 22.7356   4
  -3  -5  -6 220.840 18.2858   1
  -3  -5  -6 224.916 20.8097   3
  -3   5  -6 209.550 23.8158   5
  -3   5  -6 214.219 22.3255   1
  -4  -5  -6 42.4936 10.3967   3
  -4  -5  -6 6.22901 10.9108   4
  -4   5  -6 32.4938 10.3912   1
  -4   5  -6 22.5198 13.3774   5
  -4  -6   6 48.7798 15.9809   2
  -4  -6   6 62.6508 14.7599   4
  -4   6   6 42.7519 14.1551   1
  -4   6   6 36.9497 13.8778   5
  -4   6   6 59.2003 14.4206   2
  -3  -6   6 13.4332 9.58979   4
  -3  -6   6 13.8532 12.0459   2
   3  -6  -6 20.5703 10.4673   1
  -3   6   6 21.6170 11.9268   1
  -3   6   6 16.1255 10.7933   5
  -3   6   6 19.8914 10.7911   2
   2  -6  -6 128.294 18.1601   1
  -2  -6   6 134.005 18.5103   2
  -2  -6   6 107.434 14.9628   1
   2  -6  -6 128.016 16.9629   3
   2  -6  -6 136.770 11.3942   4
  -2  -6   6 128.922 15.6024   4
   2   6  -6 103.779 8.51493   3
  -2   6   6 119.636 18.5545   1
   2   6  -6 106.894 15.2245   1
  -2   6   6 105.057 14.5061   5
  -2   6   6 112.756 16.3725   2
   1  -6  -6 172.092 15.8042   4
  -1  -6   6 203.129 19.6599   2
   1  -6  -6 177.272 20.2904   1
  -1  -6   6 187.740 18.7345   1
   1  -6  -6 163.183 19.4626   3
  -1  -6   6 164.563 17.0946   4
   1   6  -6 124.741 16.0523   5
  -1   6   6 184.109 20.6788   1
   1   6  -6 168.322 19.0049   1
  -1   6   6 157.853 14.6908   5
   1   6  -6 174.251 13.5952   3
   0  -6  -6 105.265 13.3189   4
   0  -6  -6 89.0382 12.7298   3
   0  -6   6 76.5830 12.1931   4
   0  -6   6 84.0555 12.8766   2
   0  -6  -6 88.9219 14.7855   1
   0   6  -6 103.856 13.8532   5
   0   6  -6 82.9683 14.0584   1
   0   6  -6 108.517 11.4810   3
   0   6   6 90.7471 15.2981   1
   0   6   6 99.1732 8.69429   5
  -1  -6  -6 114.383 15.3978   4
  -1  -6  -6 103.357 8.25730   5
  -1  -6  -6 128.824 16.1744   1
   1  -6   6 101.764 10.3458   2
   1  -6   6 110.492 12.7000   4
  -1  -6  -6 98.3693 13.7596   3
  -1   6  -6 108.143 14.8047   5
   1   6   6 125.314 15.2196   1
  -1   6  -6 115.694 16.9944   1
  -2  -6  -6 114.133 13.9374   3
  -2  -6  -6 122.555 14.1448   1
  -2  -6  -6 111.256 15.9530   4
   2  -6   6 118.338 12.0868   4
  -2   6  -6 72.2767 13.0951   5
  -2   6  -6 83.0679 15.3433   1
  -2   6  -6 74.2112 11.0075   4
  -3  -6  -6 61.1057 13.2374   4
  -3  -6  -6 58.3452 9.79424   1
  -3  -6  -6 58.9717 11.1724   3
  -3   6  -6 41.4266 13.7975   5
  -3   6  -6 60.0174 13.8221   1
  -4  -6  -6 65.2998 15.3210   4
  -4  -6  -6 58.9949 11.8557   3
  -4   6  -6 42.9750 12.4797   1
  -4   6  -6 26.4545 14.3560   5
  -4  -7   6 8.74410 12.7495   2
  -4  -7   6 11.8154 11.0826   4
  -4   7   6 2.82743 11.9269   2
  -4   7   6 18.8593 12.2424   1
  -4   7   6 28.3599 15.2051   5
  -3  -7   6 32.8949 11.3412   4
   3  -7  -6 84.2438 16.1100   1
  -3  -7   6 76.1131 16.2301   2
  -3   7   6 33.0408 12.9892   5
  -3   7   6 19.6723 11.8871   2
  -3   7   6 54.9273 16.1988   1
   2  -7  -6 39.9181 12.9999   1
   2  -7  -6 25.1270 11.7595   3
  -2  -7   6 32.4282 12.1388   2
   2  -7  -6 34.9548 7.10919   4
  -2  -7   6 48.8199 12.0177   4
  -2   7   6 16.8236 11.6568   1
   2   7  -6 47.7664 11.5659   1
  -2   7   6 38.9186 9.93028   5
  -1  -7   6 49.3305 12.3623   2
   1  -7  -6 57.7248 13.5570   3
   1  -7  -6 79.2048 11.2994   4
   1  -7  -6 62.3123 14.0558   1
  -1  -7   6 37.3497 10.4629   4
  -1   7   6 61.6418 15.1246   1
  -1   7   6 56.6988 10.0316   5
   1   7  -6 58.4621 12.5786   1
   1   7  -6 51.0123 11.9861   5
   0  -7  -6 27.6837 9.34409   3
   0  -7  -6 34.2667 9.24606   4
   0  -7  -6 26.6648 6.21703   5
   0  -7   6 8.15722 7.38437   4
   0  -7  -6 24.1523 10.3136   1
   0   7  -6 24.5556 11.1871   1
   0   7   6 27.7933 5.57957   5
   0   7  -6 26.4031 10.5000   5
   0   7   6 25.7374 10.6843   1
  -1  -7  -6 82.6321 14.2996   1
   1  -7   6 88.7480 12.9340   4
  -1  -7  -6 106.980 14.9360   3
  -1  -7  -6 97.3263 15.4469   4
  -1   7  -6 118.349 16.1628   5
  -1   7  -6 110.405 18.3895   1
   1   7   6 109.935 15.7205   1
   2  -7   6 54.5228 8.98343   4
  -2  -7  -6 40.1480 10.6963   3
  -2  -7  -6 51.9062 11.6230   1
  -2  -7  -6 82.5801 15.0893   4
  -2   7  -6 49.6954 12.1694   5
  -2   7  -6 77.3769 15.8167   1
  -3  -7  -6 24.6704 9.99195   3
  -3  -7  -6 28.0169 12.4070   4
  -3   7  -6 59.6345 14.9887   1
  -3   7  -6 53.9284 15.0924   5
  -4  -7  -6 16.5237 15.1847   4
  -4   7  -6 -10.442 24.2301   5
  -4   7  -6 2.91946 13.1076   1
  -3  -8   6 8.27785 11.9743   2
  -3  -8   6 5.48371 9.41366   4
   3  -8  -6 22.8217 12.3076   1
  -3   8   6 15.3264 12.9147   1
  -3   8   6 0.70687 11.0668   5
  -2  -8   6 9.96718 10.0786   4
   2  -8  -6 24.2953 11.9394   1
  -2  -8   6 10.2964 12.4030   2
  -2   8   6 -2.4369 8.42673   5
  -2   8   6 -4.9592 11.5243   1
   1  -8  -6 12.5126 7.17846   4
  -1  -8   6 35.6376 11.9001   2
   1  -8  -6 15.1931 10.3545   3
   1  -8  -6 0.50333 10.6212   1
  -1  -8   6 2.25303 8.57785   4
   1   8  -6 18.4930 10.3872   1
   1   8  -6 30.1563 11.4243   5
  -1   8   6 8.86811 7.82772   5
  -1   8   6 32.1905 14.0030   1
   0  -8  -6 27.1107 11.0216   1
   0  -8  -6 29.7021 9.73631   4
   0  -8  -6 21.0635 11.3056   3
   0  -8   6 18.8276 9.19590   4
   0   8  -6 40.4693 12.0295   5
   0   8  -6 59.5940 15.0546   1
   0   8   6 42.2708 11.8096   1
  -1  -8  -6 38.4946 11.9818   1
  -1  -8  -6 24.6473 11.1343   4
  -1  -8  -6 40.0622 10.7282   3
   1  -8   6 21.3308 8.45480   4
  -1   8  -6 21.4829 11.3525   5
  -1   8  -6 32.7960 13.3570   1
  -2  -8  -6 18.5029 9.53656   1
  -2  -8  -6 37.9239 10.8811   3
  -2  -8  -6 19.5142 11.7851   4
  -2   8  -6 10.8420 11.8532   1
  -2   8  -6 17.8641 12.4788   5
  -3  -8  -6 59.9731 12.8205   3
  -3  -8  -6 66.9912 16.2220   4
  -3   8  -6 55.9297 16.2395   1
  -3   8  -6 61.5988 16.5385   5
  -3  -9   6 17.0950 14.1949   4
  -3  -9   6 34.5414 15.8191   2
  -3   9   6 -0.6821 11.5742   5
  -3   9   6 46.6883 16.0808   1
  -2  -9   6 11.7331 10.3907   4
   2  -9  -6 25.6551 13.5432   1
  -2  -9   6 21.9872 13.5628   2
  -2   9   6 17.5524 13.3341   1
   1  -9  -6 83.8414 13.3365   4
  -1  -9   6 85.7645 16.5445   2
   1  -9  -6 87.9027 17.6414   1
  -1  -9   6 52.5937 13.1590   4
   1  -9  -6 73.7437 16.7621   3
   1   9  -6 79.1500 15.9001   1
   1   9  -6 76.4208 14.6805   5
  -1   9   6 85.5743 17.4534   1
   0  -9  -6 12.6029 10.8705   3
   0  -9   6 -0.9488 8.66256   4
   0  -9  -6 27.3729 12.1535   1
   0  -9  -6 14.3386 9.47903   4
   0   9  -6 12.2491 11.2295   5
   0   9  -6 -7.8782 10.3937   1
   0   9   6 14.6778 11.2495   1
  -1  -9  -6 47.7328 13.8771   4
  -1  -9  -6 66.0322 14.1560   3
  -1  -9  -6 58.8883 14.5663   1
   1  -9   6 43.9028 10.6406   4
  -1   9  -6 48.0966 15.1035   1
  -1   9  -6 31.8241 12.6100   5
  -2  -9  -6 7.51347 11.8899   4
  -2  -9  -6 -1.9086 9.13736   3
  -2  -9  -6 8.02764 10.3246   1
  -2   9  -6 -1.8866 13.2952   5
  -2   9  -6 31.1419 14.5190   1
  -1 -10   6 7.13305 9.50980   4
   1 -10  -6 -0.9323 12.6758   3
  -1 -10   6 5.54051 11.4340   2
   1 -10  -6 9.47658 14.0211   1
  -1  10   6 -7.8046 11.5488   1
   1  10  -6 24.1774 11.1918   5
   0 -10   6 41.1635 11.5927   4
   0 -10  -6 14.9730 12.3689   3
   0 -10  -6 9.38052 9.40100   4
   0 -10  -6 13.6294 12.2453   1
   0  10  -6 40.9298 12.6568   5
   0  10  -6 27.4173 14.2350   1
  -1 -10  -6 10.0939 11.8317   3
  -1 -10  -6 6.16211 11.6949   1
  -1 -10  -6 -0.0747 10.4584   4
  -1  10  -6 24.2671 14.8130   1
  -1  10  -6 13.2833 13.5841   5
  -5   0   7 172.290 16.5350   4
  -5   0   7 129.099 22.4175   2
  -4   0   7 219.745 23.8071   2
  -4   0   7 205.649 20.7789   1
  -4   0   7 211.193 18.2167   4
   4   0  -7 198.599 18.9957   1
  -3   0   7 262.646 24.5477   2
  -3   0   7 273.593 20.7518   4
   3   0  -7 267.197 20.9044   4
   3   0  -7 261.322 22.0355   1
  -3   0   7 247.915 21.9410   1
   2   0  -7 1773.45 124.302   1
   2   0  -7 1846.74 122.710   3
   2   0  -7 1839.51 125.084   2
  -2   0   7 1875.02 122.337   3
  -2   0   7 1862.37 125.138   2
   2   0  -7 1973.68 123.361   4
  -2   0   7 1908.29 123.125   4
   1   0  -7 354.550 27.8153   1
   1   0  -7 377.407 26.6972   4
   1   0  -7 388.982 26.0847   3
  -1   0   7 369.497 27.7227   2
  -1   0   7 377.640 28.0647   1
  -1   0   7 407.820 27.1312   4
   1   0  -7 342.209 27.3518   2
  -1   0   7 364.927 25.8315   3
   0   0  -7 1883.16 120.503   2
   0   0   7 1844.70 120.309   2
   0   0  -7 1810.25 120.381   3
   0   0   7 1873.54 120.556   3
   0   0   7 2033.06 119.500   5
   0   0   7 1769.46 120.722   4
   0   0  -7 1734.90 121.228   1
   0   0  -7 1898.47 120.669   4
   0   0  -7 1691.69 119.670   5
   0   0   7 1791.41 121.304   1
   1   0   7 946.311 65.9518   1
  -1   0  -7 925.493 66.0568   1
  -1   0  -7 1044.60 65.0677   2
  -1   0  -7 1071.70 64.7612   5
  -1   0  -7 1005.47 66.2027   4
   1   0   7 874.485 65.2009   5
  -2   0  -7 665.530 43.6457   5
   2   0   7 614.799 42.5799   1
  -2   0  -7 650.137 43.2381   1
  -2   0  -7 615.348 44.7496   3
   2   0   7 574.035 43.9552   5
  -3   0  -7 80.0079 8.61135   1
  -3   0  -7 64.6716 11.8359   5
  -3   0  -7 79.4531 10.7542   2
  -3   0  -7 74.5579 12.5931   3
  -4   0  -7 42.1742 9.39861   2
  -4   0  -7 29.1045 10.5255   5
  -4   0  -7 36.0098 10.6785   3
  -5   0  -7 96.5774 17.3966   5
  -5   0  -7 79.9429 14.7140   4
  -5   0  -7 127.500 19.7431   3
  -5  -1   7 47.7396 10.4794   4
  -5  -1   7 50.0546 15.0648   2
  -5   1   7 61.4710 17.3448   5
  -5   1   7 48.7032 13.9676   2
   4  -1  -7 37.1110 8.54828   1
  -4  -1   7 38.3281 8.53699   4
   4  -1  -7 38.9238 7.34452   4
  -4  -1   7 25.2437 10.7596   2
  -4  -1   7 36.8739 7.14153   3
  -4   1   7 26.4975 10.0434   2
  -4   1   7 36.0444 6.91646   4
  -3  -1   7 690.342 54.0333   2
   3  -1  -7 806.065 50.6627   4
  -3  -1   7 743.067 51.8923   1
   3  -1  -7 724.236 52.2631   1
  -3  -1   7 768.045 49.5939   3
  -3  -1   7 769.242 51.5363   4
  -3   1   7 749.326 51.0490   3
  -3   1   7 678.279 52.2589   1
  -3   1   7 707.946 53.3177   2
   3   1  -7 738.958 51.8966   1
  -3   1   7 684.981 49.9432   4
   2  -1  -7 933.221 63.2363   3
  -2  -1   7 942.493 61.2199   3
  -2  -1   7 900.437 63.1992   4
  -2  -1   7 896.671 63.9344   1
   2  -1  -7 946.071 62.4718   4
  -2  -1   7 862.295 64.8408   2
   2  -1  -7 879.828 64.3296   1
   2  -1  -7 871.214 64.5671   2
   2   1  -7 963.165 65.6929   2
  -2   1   7 950.784 64.6524   2
   2   1  -7 970.594 63.5353   4
  -2   1   7 982.971 64.7612   1
   2   1  -7 938.381 64.1610   1
  -2   1   7 941.161 62.7031   3
  -2   1   7 976.865 62.5370   4
   1  -1  -7 1673.34 106.045   4
   1  -1  -7 1590.20 107.654   1
  -1  -1   7 1626.61 107.354   1
  -1  -1   7 1474.19 105.974   5
   1  -1  -7 1634.79 107.170   2
  -1  -1   7 1599.70 105.026   3
  -1  -1   7 1648.16 107.246   2
   1  -1  -7 1602.00 106.101   3
  -1  -1   7 1626.63 106.506   4
  -1   1   7 1582.23 106.986   2
   1   1  -7 1620.86 107.221   2
   1   1  -7 1565.33 104.909   3
   1   1  -7 1569.94 107.389   1
  -1   1   7 1625.68 106.149   4
  -1   1   7 1629.23 105.952   3
   1   1  -7 1676.65 106.624   4
  -1   1   7 1647.54 107.695   1
   0  -1   7 923.861 63.4889   1
   0  -1  -7 880.343 62.3771   3
   0  -1  -7 954.680 62.6985   4
   0  -1   7 998.361 61.6477   5
   0  -1   7 942.541 62.7951   4
   0  -1  -7 859.664 63.2315   1
   0  -1   7 906.370 62.0440   2
   0  -1  -7 947.803 62.6768   2
   0   1  -7 879.010 63.4017   1
   0   1  -7 947.931 62.4859   4
   0   1   7 934.869 62.5800   3
   0   1  -7 955.036 62.2667   2
   0   1   7 969.085 60.9706   5
   0   1  -7 927.427 62.1579   3
   0   1   7 990.351 62.7833   2
   0   1  -7 874.206 61.8967   5
   0   1   7 913.177 63.2953   1
  -1  -1  -7 713.086 41.0922   5
  -1  -1  -7 619.079 43.3520   3
  -1  -1  -7 591.807 42.8464   1
   1  -1   7 588.330 42.4550   5
   1  -1   7 589.968 42.9942   1
   1   1   7 608.364 43.3722   3
  -1   1  -7 600.789 43.4762   3
  -1   1  -7 678.683 42.0524   5
  -1   1  -7 648.077 41.2385   2
  -1   1  -7 638.375 42.7058   4
   1   1   7 591.595 42.6338   1
   1   1   7 544.753 41.5571   5
  -1   1  -7 585.661 43.1556   1
  -2  -1  -7 296.494 27.8321   5
  -2  -1  -7 304.561 29.5867   3
  -2   1  -7 478.677 29.7643   4
  -2   1  -7 428.900 29.4795   5
   2   1   7 414.078 27.8431   1
  -2   1  -7 399.060 29.0872   1
  -2   1  -7 452.036 27.2015   2
  -3  -1  -7 176.089 13.2015   1
  -3  -1  -7 189.290 16.8779   5
  -3  -1  -7 195.128 17.9852   3
  -3   1  -7 157.191 14.4350   1
  -3   1  -7 150.565 14.5396   2
  -3   1  -7 173.671 17.3119   5
  -3   1  -7 162.138 15.0254   1
  -4  -1  -7 55.5736 11.9480   2
  -4  -1  -7 43.0175 11.1003   5
  -4  -1  -7 64.0000 13.5754   3
  -4   1  -7 76.1500 9.28281   1
  -4   1  -7 86.4012 11.0628   2
  -4   1  -7 85.9802 15.1196   5
  -5  -1  -7 20.1304 9.46976   4
  -5  -1  -7 21.4984 11.4049   5
  -5  -1  -7 19.5773 11.7018   3
  -5   1  -7 12.1856 12.1561   5
  -5   1  -7 3.24874 11.9706   3
  -5  -2   7 34.2098 10.1523   4
  -5  -2   7 45.1498 15.1934   2
  -5   2   7 44.6839 10.8530   1
  -5   2   7 44.0609 13.3743   2
  -5   2   7 32.4194 15.6235   5
  -4  -2   7 54.2672 13.5439   2
  -4  -2   7 62.2784 11.6534   4
   4  -2  -7 83.5639 14.1561   1
  -4   2   7 96.8509 17.2876   5
  -4   2   7 92.9471 15.8243   2
  -4   2   7 91.2273 9.35097   4
  -3  -2   7 235.939 15.8416   3
  -3  -2   7 229.855 19.8850   4
  -3  -2   7 231.224 22.7157   2
   3  -2  -7 230.913 20.8440   1
   3  -2  -7 244.472 17.4776   4
  -3  -2   7 255.244 20.0189   1
  -3   2   7 193.449 16.9780   4
   3   2  -7 198.163 19.0753   1
  -3   2   7 194.127 20.9553   2
  -3   2   7 209.475 20.7580   1
   2  -2  -7 465.005 36.3323   3
  -2  -2   7 478.198 37.9705   2
   2  -2  -7 447.941 37.1166   1
   2  -2  -7 502.040 34.5493   4
  -2  -2   7 475.558 36.3638   4
  -2  -2   7 497.865 36.7707   1
  -2   2   7 522.606 34.7380   4
  -2   2   7 560.662 36.1513   3
  -2   2   7 513.226 37.6796   1
  -2   2   7 528.967 37.4105   2
   2   2  -7 512.057 36.9208   1
   1  -2  -7 731.434 47.8407   4
   1  -2  -7 730.642 50.2093   1
  -1  -2   7 707.026 49.2673   2
  -1  -2   7 683.031 47.9846   5
   1  -2  -7 717.277 49.1688   2
  -1  -2   7 686.173 48.5829   4
  -1  -2   7 719.093 49.4078   1
   1  -2  -7 699.670 48.5776   3
  -1   2   7 730.858 48.3297   3
  -1   2   7 715.755 49.8816   1
   1   2  -7 695.889 49.1769   2
  -1   2   7 679.016 48.8391   2
   1   2  -7 746.118 48.8350   4
   1   2  -7 668.657 46.2401   3
   1   2  -7 668.257 49.3874   1
   0  -2   7 309.683 22.4474   4
   0  -2   7 282.671 22.9943   1
   0  -2  -7 264.306 22.9901   1
   0  -2   7 310.070 21.0432   5
   0  -2   7 291.876 21.4864   2
   0  -2  -7 281.758 22.1143   3
   0  -2  -7 307.198 22.4173   2
   0   2  -7 283.670 21.9042   4
   0   2  -7 301.075 21.5878   5
   0   2   7 297.252 21.9715   3
   0   2   7 288.759 22.9754   1
   0   2   7 278.949 19.5381   5
   0   2  -7 275.305 23.1661   1
   0   2  -7 290.703 21.4046   3
   0   2  -7 289.614 21.2776   2
   0   2   7 307.711 22.5295   2
   1  -2   7 1884.62 135.024   5
  -1  -2  -7 2117.79 135.283   2
   1  -2   7 1947.96 135.606   1
  -1  -2  -7 1899.99 135.329   1
  -1  -2  -7 1890.27 135.328   3
  -1  -2  -7 2249.88 132.809   5
   1  -2   7 2029.98 135.102   4
  -1   2  -7 2309.35 134.793   5
   1   2   7 2070.62 135.885   3
  -1   2  -7 2145.22 134.937   4
   1   2   7 2060.35 135.282   1
  -1   2  -7 2007.78 136.080   1
  -1   2  -7 2021.24 132.884   2
  -2  -2  -7 296.772 23.6677   3
  -2  -2  -7 266.991 20.9828   5
  -2  -2  -7 283.824 21.6398   1
   2   2   7 299.218 21.1266   1
  -2   2  -7 298.372 21.8991   4
  -2   2  -7 284.867 23.0995   1
  -2   2  -7 289.281 22.7054   5
  -3  -2  -7 293.625 20.6198   1
  -3  -2  -7 271.597 23.5291   5
  -3  -2  -7 274.306 25.1286   3
  -3   2  -7 293.775 20.5196   2
  -3   2  -7 277.673 23.5519   1
  -3   2  -7 322.960 23.2373   4
  -3   2  -7 318.829 25.6506   5
  -3   2  -7 287.984 23.2266   1
  -4  -2  -7 6.45981 9.35007   3
  -4  -2  -7 26.2905 10.3845   2
  -4  -2  -7 21.8501 8.72771   5
  -4   2  -7 19.1993 11.1444   5
  -4   2  -7 30.1272 7.65601   1
  -5  -2  -7 155.077 21.3756   4
  -5  -2  -7 165.753 22.1399   3
  -5  -2  -7 175.550 22.8159   2
  -5  -2  -7 203.380 22.5860   5
  -5   2  -7 184.126 25.6770   5
  -5   2  -7 193.487 16.6162   1
  -5  -3   7 42.5870 15.9986   2
  -5  -3   7 40.1246 11.5287   4
  -5   3   7 36.7040 13.1719   2
  -5   3   7 44.3921 18.0198   5
  -5   3   7 44.2440 11.8920   1
  -4  -3   7 218.970 20.8174   4
  -4  -3   7 208.006 23.7700   2
  -4   3   7 202.898 25.5509   5
  -4   3   7 163.357 21.3784   2
   3  -3  -7 117.661 10.8053   4
  -3  -3   7 116.544 14.1480   1
   3  -3  -7 122.927 15.9002   1
  -3  -3   7 112.362 14.8998   4
  -3  -3   7 110.637 17.0178   2
  -3   3   7 158.535 19.4549   5
   3   3  -7 160.569 14.7116   1
  -3   3   7 162.656 17.0749   2
  -3   3   7 168.026 17.2067   1
   2  -3  -7 611.487 39.1031   4
   2  -3  -7 577.911 42.9258   1
  -2  -3   7 571.265 43.1766   2
  -2  -3   7 605.121 41.9542   1
   2  -3  -7 589.276 42.2262   3
  -2  -3   7 590.396 41.7365   4
   2   3  -7 547.840 41.6899   1
  -2   3   7 504.493 42.0104   5
  -2   3   7 581.010 42.8613   1
  -2   3   7 549.459 41.7749   2
   1  -3  -7 683.425 40.9850   4
   1  -3  -7 613.779 43.5414   1
  -1  -3   7 599.906 42.4627   2
  -1  -3   7 615.260 42.6967   1
   1  -3  -7 617.345 42.3148   3
   1  -3  -7 585.219 42.2224   2
  -1  -3   7 667.657 41.4563   5
  -1  -3   7 610.315 41.8326   4
  -1   3   7 526.552 40.8841   5
   1   3  -7 558.662 38.9096   3
   1   3  -7 561.828 41.8150   4
  -1   3   7 533.697 41.8970   2
   1   3  -7 551.039 42.5380   1
  -1   3   7 569.158 42.9443   1
  -1   3   7 565.464 41.3307   3
   0  -3   7 942.286 63.0880   2
   0  -3  -7 931.639 65.0565   1
   0  -3  -7 992.459 64.3873   2
   0  -3  -7 934.879 63.9911   3
   0  -3   7 1010.20 63.0981   5
   0  -3   7 960.036 64.9051   1
   0  -3   7 938.778 63.7438   4
   0   3   7 958.996 64.9822   1
   0   3  -7 896.648 63.3056   5
   0   3   7 840.741 60.8653   5
   0   3  -7 1013.61 63.9986   4
   0   3  -7 1000.41 65.4445   1
   0   3   7 880.537 61.0008   5
   0   3   7 932.427 63.7603   3
  -1  -3  -7 86.6329 9.95839   3
   1  -3   7 79.5857 8.99936   4
  -1   3  -7 52.2255 9.10276   5
  -1   3  -7 39.7189 8.64311   1
  -1   3  -7 38.8133 7.04519   4
  -2  -3  -7 168.954 13.2080   5
  -2  -3  -7 183.435 16.1324   3
  -2  -3  -7 145.439 14.3907   1
  -2   3  -7 160.454 14.1507   4
  -2   3  -7 185.889 16.8037   5
  -2   3  -7 178.276 16.4574   1
  -2   3  -7 149.768 16.4267   1
   2   3   7 176.924 14.0156   1
  -3  -3  -7 250.277 19.8314   1
  -3  -3  -7 277.819 24.0300   3
  -3  -3  -7 248.922 21.7826   5
  -3   3  -7 284.800 21.3060   4
  -3   3  -7 302.609 23.5076   1
  -3   3  -7 274.833 23.4218   1
  -3   3  -7 305.201 25.8645   5
  -4  -3  -7 75.0106 13.0908   5
  -4  -3  -7 101.128 16.0147   4
  -4  -3  -7 85.0787 14.0468   3
  -4   3  -7 46.7172 14.6864   5
  -4   3  -7 62.8835 11.0918   1
  -5  -3  -7 25.4858 12.6311   2
  -5  -3  -7 10.1495 10.6638   4
  -5  -3  -7 30.1273 11.4792   3
  -5   3  -7 35.0723 8.76201   1
  -5   3  -7 38.6852 16.5673   5
  -5  -4   7 23.4286 13.5644   2
  -5  -4   7 37.4704 11.8442   4
  -5   4   7 27.4955 14.6399   5
  -5   4   7 21.3421 10.5732   1
  -5   4   7 -3.9736 10.9891   2
  -4  -4   7 36.9932 14.2554   2
  -4  -4   7 37.5627 11.3915   4
  -4   4   7 70.1085 16.9556   5
  -4   4   7 64.0591 13.4569   1
  -4   4   7 61.0470 13.1440   2
  -3  -4   7 173.041 18.1297   1
   3  -4  -7 193.575 13.9290   4
  -3  -4   7 226.423 23.3001   2
   3  -4  -7 199.084 20.6843   1
  -3   4   7 170.466 19.8472   2
  -3   4   7 200.653 20.7523   1
  -3   4   7 204.056 21.4307   1
   3   4  -7 182.568 18.1977   1
  -3   4   7 198.319 22.4560   5
  -2  -4   7 367.495 33.5213   2
  -2  -4   7 398.815 32.6962   4
   2  -4  -7 395.882 33.3771   3
  -2  -4   7 427.859 32.7380   1
   2  -4  -7 418.178 29.5169   4
   2  -4  -7 396.595 33.8822   1
  -2   4   7 471.648 34.9423   1
  -2   4   7 439.233 33.2045   5
   2   4  -7 473.544 33.3458   1
  -2   4   7 449.845 33.3277   2
  -1  -4   7 160.837 16.1830   1
   1  -4  -7 148.732 16.0118   3
  -1  -4   7 148.912 15.7741   4
   1  -4  -7 160.170 16.9838   1
  -1  -4   7 155.756 16.3144   2
  -1   4   7 167.452 16.0916   2
   1   4  -7 167.773 16.9349   1
  -1   4   7 151.021 14.0287   5
   1   4  -7 175.566 12.1252   3
   1   4  -7 137.521 14.8552   5
   0  -4   7 195.415 19.1249   1
   0  -4  -7 214.944 18.6830   3
   0  -4   7 217.617 17.7722   2
   0  -4  -7 203.030 19.7242   1
   0  -4   7 204.106 17.9682   4
   0   4  -7 214.391 18.4754   5
   0   4  -7 217.055 20.3300   1
   0   4  -7 247.089 18.8814   4
   0   4   7 222.896 14.5013   5
   1  -4   7 560.353 39.2204   4
  -1  -4  -7 591.732 40.2209   3
   1  -4   7 564.287 36.7421   2
  -1  -4  -7 577.071 40.5976   1
  -1   4  -7 535.680 41.4427   1
   1   4   7 518.508 39.7745   1
  -1   4  -7 545.286 38.9403   4
  -1   4  -7 528.981 38.9450   5
  -1   4  -7 543.295 41.3147   1
  -2  -4  -7 261.527 22.7285   3
  -2  -4  -7 266.889 18.9932   5
  -2  -4  -7 266.325 21.9837   1
  -2   4  -7 274.370 24.0946   1
  -2   4  -7 269.126 23.5963   1
  -2   4  -7 267.924 20.8051   4
  -2   4  -7 277.436 22.7145   5
  -3  -4  -7 84.4849 10.9823   5
  -3  -4  -7 97.3494 13.8030   3
  -3  -4  -7 106.124 10.0786   1
  -3   4  -7 84.4985 14.1896   1
  -3   4  -7 84.7885 15.1128   5
  -4  -4  -7 16.8728 11.0242   4
  -4  -4  -7 39.3318 14.0722   5
  -4  -4  -7 41.0823 10.7854   3
  -4   4  -7 44.8533 14.8400   5
  -4   4  -7 57.8606 10.9086   1
  -5  -4  -7 61.4582 14.7806   4
  -5  -4  -7 55.3456 13.4341   3
  -5  -4  -7 35.5622 15.2191   2
  -5   4  -7 35.4043 18.1866   5
  -5   4  -7 44.7172 10.6513   1
  -5  -5   7 57.2009 14.9355   4
  -5  -5   7 42.9767 15.5065   2
  -5   5   7 72.1550 19.7778   5
  -5   5   7 58.4005 15.8187   2
  -5   5   7 75.5301 14.8858   1
  -4  -5   7 29.0550 10.9965   4
  -4  -5   7 40.5825 13.4565   2
  -4   5   7 27.6530 11.0712   1
  -4   5   7 22.8392 11.4668   2
  -4   5   7 26.5463 13.4126   5
   3  -5  -7 137.701 18.8236   1
  -3  -5   7 149.377 16.7530   4
  -3  -5   7 123.642 18.6267   2
  -3   5   7 94.4043 16.9250   2
  -3   5   7 133.764 18.9811   1
  -3   5   7 119.110 18.6865   5
   3   5  -7 120.508 15.3071   1
  -2  -5   7 293.117 25.3607   1
  -2  -5   7 281.363 25.8860   4
   2  -5  -7 325.918 22.1753   4
   2  -5  -7 294.210 26.4248   3
   2  -5  -7 306.733 27.8595   1
  -2  -5   7 305.944 27.1799   2
  -2   5   7 247.716 24.9348   2
  -2   5   7 284.272 25.0763   5
   2   5  -7 337.409 26.5989   1
  -2   5   7 319.567 28.2156   1
   1  -5  -7 360.913 27.7918   3
   1  -5  -7 337.337 29.2027   1
  -1  -5   7 384.270 28.3968   1
  -1  -5   7 345.908 27.8956   2
  -1  -5   7 367.481 27.4227   4
   1   5  -7 310.040 27.8687   1
   1   5  -7 315.644 23.3288   3
  -1   5   7 321.737 29.1423   1
  -1   5   7 305.237 24.4973   5
   0  -5  -7 416.008 35.5491   1
   0  -5   7 436.584 33.1795   2
   0  -5   7 432.036 33.5935   4
   0  -5  -7 439.448 34.3906   3
   0   5  -7 439.043 33.3054   5
   0   5   7 441.503 35.5163   1
   0   5   7 465.464 29.8506   5
   0   5  -7 482.040 33.0328   3
   0   5  -7 488.506 36.3730   1
  -1  -5  -7 71.2466 11.0516   3
   1  -5   7 59.4196 6.89215   2
   1  -5   7 52.5579 8.70378   4
  -1  -5  -7 62.9899 10.7929   1
  -1   5  -7 34.5336 8.12843   4
  -1   5  -7 32.2088 10.2002   1
   1   5   7 24.3680 8.02569   1
  -1   5  -7 26.6221 8.86620   5
  -2  -5  -7 189.874 18.9055   3
  -2  -5  -7 200.838 18.8250   1
   2  -5   7 187.273 17.2028   4
  -2  -5  -7 187.177 13.8291   5
  -2  -5  -7 196.059 13.4485   5
  -2   5  -7 208.020 19.2661   5
  -2   5  -7 202.523 21.3954   1
   2   5   7 202.411 17.6174   1
  -2   5  -7 212.019 17.0026   4
  -2   5  -7 226.157 21.0939   1
  -3  -5  -7 139.007 19.5227   4
  -3  -5  -7 119.400 13.3092   1
  -3  -5  -7 130.984 16.6410   3
  -3   5  -7 131.225 17.7609   5
  -3   5  -7 137.971 18.2136   1
  -4  -5  -7 108.022 18.1780   4
  -4  -5  -7 75.9151 13.5056   3
  -4   5  -7 82.7259 18.3746   5
  -4   5  -7 105.790 16.6647   1
  -4  -6   7 36.0859 14.3452   2
  -4  -6   7 26.6199 12.3319   4
  -4   6   7 25.2200 12.3141   1
  -4   6   7 20.6297 12.7247   2
  -4   6   7 46.8174 16.4764   5
  -3  -6   7 25.8805 11.1214   4
  -3  -6   7 38.7760 13.9771   2
   3  -6  -7 32.9937 11.4956   1
  -3   6   7 40.8301 12.6035   5
  -3   6   7 37.1920 12.3004   2
  -3   6   7 11.5490 10.7279   1
   2  -6  -7 142.211 20.2365   3
   2  -6  -7 161.796 14.3414   4
  -2  -6   7 164.524 20.7695   2
   2  -6  -7 146.295 13.9943   4
  -2  -6   7 156.994 17.9060   4
   2  -6  -7 161.331 20.9138   1
  -2   6   7 207.733 22.1392   1
  -2   6   7 186.856 18.2645   5
  -2   6   7 168.415 19.7728   2
   2   6  -7 152.705 18.9250   1
  -1  -6   7 81.7415 12.6200   4
   1  -6  -7 97.0075 15.5743   3
   1  -6  -7 100.081 16.3540   1
  -1  -6   7 97.2827 14.6578   2
   1   6  -7 96.0619 8.88948   3
  -1   6   7 96.1872 15.4094   1
  -1   6   7 88.0154 10.6640   5
   1   6  -7 83.5679 13.8251   1
   1   6  -7 73.9182 12.7509   5
   0  -6  -7 345.583 30.1029   1
   0  -6   7 336.221 27.2504   2
   0  -6  -7 340.116 28.6720   3
   0  -6   7 317.629 27.1719   4
   0   6  -7 316.277 27.6333   5
   0   6  -7 337.648 26.2451   3
   0   6  -7 375.715 30.8275   1
   0   6   7 328.799 29.6135   1
   0   6   7 345.546 23.1697   5
   1  -6   7 455.327 32.2183   2
   1  -6   7 452.462 33.5683   4
  -1  -6  -7 471.718 36.6017   1
  -1  -6  -7 469.924 35.3667   3
   1  -6   7 424.182 31.1896   2
  -1   6  -7 472.696 37.8637   1
   1   6   7 457.398 35.7670   1
  -1   6  -7 429.947 33.8636   5
   2  -6   7 258.754 21.2416   4
  -2  -6  -7 240.544 25.2983   4
  -2  -6  -7 276.582 23.6946   1
  -2  -6  -7 268.366 23.6620   3
  -2   6  -7 242.842 23.0072   5
  -2   6  -7 248.017 25.9237   1
  -3  -6  -7 245.124 20.3769   1
  -3  -6  -7 232.595 22.4746   3
  -3  -6  -7 231.441 25.5053   4
  -3   6  -7 198.274 24.1852   1
  -3   6  -7 200.569 24.1542   5
  -4  -6  -7 32.1108 13.8217   4
  -4  -6  -7 33.4793 10.7315   3
  -4   6  -7 35.6289 14.8910   5
  -4   6  -7 50.6943 13.5365   1
  -4  -7   7 7.65166 10.1203   4
  -4  -7   7 -2.3041 13.2108   2
  -4   7   7 -4.3939 12.0488   2
  -4   7   7 9.27308 12.0711   1
  -4   7   7 -1.4306 12.6282   5
  -3  -7   7 30.7191 14.0304   2
   3  -7  -7 29.7643 12.6729   1
  -3  -7   7 46.2283 12.0101   4
  -3   7   7 20.8993 12.3308   5
  -3   7   7 44.9653 13.9648   1
  -3   7   7 43.1624 13.7233   2
   2  -7  -7 73.5478 15.5390   3
  -2  -7   7 71.3080 15.9937   2
  -2  -7   7 72.1882 13.6633   4
   2  -7  -7 96.8361 16.4763   1
   2  -7  -7 84.7641 10.2230   4
  -2   7   7 60.5490 11.5974   5
   2   7  -7 93.2066 15.8805   1
  -2   7   7 96.8393 18.2814   1
   1  -7  -7 149.655 20.3322   1
  -1  -7   7 140.226 18.1249   2
  -1  -7   7 96.0154 15.6961   4
   1  -7  -7 113.092 14.3565   4
   1  -7  -7 116.215 18.6563   3
  -1   7   7 148.837 20.2359   1
   1   7  -7 103.261 16.7337   5
   1   7  -7 160.269 19.4320   1
  -1   7   7 146.475 13.3586   5
   0  -7   7 11.7234 7.87311   4
   0  -7  -7 28.8238 9.92442   3
   0  -7  -7 17.4411 8.80405   4
   0  -7   7 30.8022 9.44059   2
   0  -7  -7 34.5137 11.6867   1
   0   7  -7 15.9662 10.5400   5
   0   7   7 32.9107 5.90764   5
   0   7  -7 36.8761 11.3210   1
   0   7   7 30.3763 12.2075   1
  -1  -7  -7 143.398 17.9340   4
  -1  -7  -7 139.142 18.8760   1
  -1  -7  -7 124.228 16.7417   3
   1  -7   7 142.521 14.1030   2
   1  -7   7 141.876 15.2457   4
   1   7   7 107.790 16.7704   1
  -1   7  -7 119.499 16.2022   5
  -1   7  -7 121.288 19.6646   1
  -2  -7  -7 121.646 16.2275   1
  -2  -7  -7 112.986 17.0317   4
  -2  -7  -7 108.647 16.3249   3
   2  -7   7 110.919 13.2783   4
  -2   7  -7 129.058 19.6702   1
  -2   7  -7 82.0638 15.0113   5
  -3  -7  -7 37.6533 13.9953   4
  -3  -7  -7 40.7801 10.7786   3
  -3  -7  -7 24.3572 8.65200   1
  -3   7  -7 36.8002 14.7134   5
  -3   7  -7 34.0877 12.3573   1
  -4  -7  -7 53.8170 12.4576   3
   3  -8  -7 0.70251 9.75633   1
  -3  -8   7 20.6657 13.9952   2
  -3  -8   7 -8.4310 8.81834   4
  -3   8   7 0.43246 10.7633   5
  -3   8   7 12.5175 14.0468   1
   2  -8  -7 98.3130 18.6693   1
   2  -8  -7 58.2027 16.0754   3
  -2  -8   7 126.334 20.1388   2
  -2  -8   7 92.7163 16.0040   4
  -2   8   7 156.534 23.5686   1
  -2   8   7 112.382 15.2566   5
   1  -8  -7 45.3855 13.8518   3
  -1  -8   7 35.9385 12.3794   2
   1  -8  -7 37.3093 9.81039   4
   1  -8  -7 42.0384 13.8876   1
  -1  -8   7 42.6693 11.3832   4
   1   8  -7 37.2990 12.1591   5
  -1   8   7 26.2501 9.01422   5
   1   8  -7 30.8730 12.2867   1
  -1   8   7 19.1186 12.4653   1
   0  -8  -7 227.568 24.4049   3
   0  -8  -7 238.831 26.1509   1
   0  -8   7 236.958 22.7255   2
   0  -8  -7 197.421 21.9391   4
   0  -8   7 220.525 22.2953   4
   0   8  -7 213.686 23.2551   5
   0   8  -7 222.863 26.2776   1
   0   8   7 215.297 25.2849   1
  -1  -8  -7 54.5097 13.5640   4
  -1  -8  -7 57.4144 12.5952   3
   1  -8   7 50.0090 10.8891   4
  -1  -8  -7 52.7096 13.3338   1
  -1   8  -7 72.0706 13.5972   5
  -1   8  -7 94.9402 18.5551   1
  -2  -8  -7 29.0308 10.8767   1
  -2  -8  -7 33.2998 12.7734   4
  -2  -8  -7 35.3238 11.0216   3
  -2   8  -7 24.7638 13.6476   5
  -2   8  -7 28.8660 13.5884   1
  -3  -8  -7 65.2861 13.0505   3
  -3  -8  -7 64.5876 16.2094   4
  -3   8  -7 19.3713 12.7012   1
  -3   8  -7 23.4492 13.7206   5
  -3  -9   7 -4.0768 13.4406   2
  -3   9   7 6.77514 13.4293   1
  -2  -9   7 19.9088 13.7140   2
   2  -9  -7 33.9848 13.8432   1
  -2  -9   7 26.6163 11.6402   4
  -2   9   7 27.5425 13.7916   1
  -1  -9   7 56.9939 14.3687   2
   1  -9  -7 12.7021 12.3672   3
  -1  -9   7 12.1422 10.4464   4
   1  -9  -7 32.3602 13.5552   1
   1  -9  -7 34.4290 14.9796   4
   1   9  -7 25.5414 11.1014   5
   1   9  -7 20.7992 12.9728   1
  -1   9   7 23.1565 13.3048   1
   0  -9  -7 24.1714 12.4286   3
   0  -9   7 10.5112 10.0009   4
   0  -9  -7 18.9133 10.5679   4
   0  -9  -7 32.3034 13.5567   1
   0  -9   7 26.3665 11.0258   2
   0   9  -7 31.7662 13.1842   1
   0   9  -7 35.2633 13.0565   5
   0   9   7 30.9367 18.0340   1
   1  -9   7 30.4624 10.1046   4
  -1  -9  -7 32.7476 12.1583   4
  -1  -9  -7 24.3116 11.8991   3
  -1  -9  -7 25.6642 12.4100   1
  -1   9  -7 16.9093 12.8243   5
  -1   9  -7 32.2640 13.9051   1
  -2  -9  -7 26.2829 11.5992   3
  -2  -9  -7 21.7791 11.0804   1
  -2  -9  -7 25.7587 12.2627   4
  -2   9  -7 4.44828 12.5056   5
  -2   9  -7 42.0202 14.8301   1
  -1 -10   7 43.1360 13.1443   4
   1 -10  -7 7.30570 13.1841   1
   1 -10  -7 33.4511 15.6170   3
  -1 -10   7 32.3091 14.8601   2
   1  10  -7 45.7963 12.9561   5
  -1  10   7 10.3328 14.0402   1
   0 -10  -7 53.7989 16.5260   3
   0 -10   7 77.0347 14.9412   4
   0 -10  -7 59.7314 14.0905   4
   0 -10  -7 52.2475 16.4196   1
   0  10  -7 134.773 19.3968   5
   0  10  -7 82.9735 18.9654   1
  -1 -10  -7 27.5913 13.3544   3
  -1 -10  -7 11.2532 11.6151   4
  -1  10  -7 1.16280 12.4973   1
  -1  10  -7 10.0279 13.4230   5
  -5   0   8 222.126 20.8994   4
  -5   0   8 277.852 28.7108   2
  -4   0   8 51.1624 13.6123   2
  -4   0   8 54.2179 9.34803   4
  -3   0   8 842.754 56.1155   3
  -3   0   8 806.671 58.3237   1
  -3   0   8 812.480 56.7524   4
  -3   0   8 797.458 59.6865   2
   3   0  -8 846.526 57.2338   4
   3   0  -8 847.456 58.5923   1
   2   0  -8 401.917 28.5087   4
   2   0  -8 388.438 27.7013   3
   2   0  -8 372.959 29.7661   1
  -2   0   8 380.046 29.8757   1
  -2   0   8 396.280 30.7346   2
  -2   0   8 405.905 27.3323   3
  -2   0   8 360.748 28.1892   4
   1   0  -8 786.667 52.5357   4
   1   0  -8 738.387 53.7407   1
  -1   0   8 775.705 53.8613   1
   1   0  -8 773.971 51.7844   3
  -1   0   8 703.717 51.9999   5
   1   0  -8 802.948 53.5559   2
  -1   0   8 792.552 51.8260   3
  -1   0   8 765.057 52.7173   4
  -1   0   8 809.809 53.5790   2
   0   0   8 3059.17 199.526   1
   0   0  -8 2961.19 199.517   1
   0   0  -8 2952.06 198.315   3
   0   0   8 3050.56 198.584   3
   0   0  -8 3124.39 198.533   2
   0   0  -8 3099.54 198.708   4
   0   0  -8 2744.34 197.566   5
   0   0   8 2939.90 198.746   4
   0   0   8 3062.40 198.323   2
   0   0   8 3408.03 197.414   5
   1   0   8 790.368 55.1232   1
   1   0   8 751.351 54.0570   5
  -1   0  -8 856.716 53.4754   5
  -1   0  -8 762.400 55.1927   1
  -1   0  -8 846.050 54.0137   2
  -1   0  -8 762.494 55.2730   3
  -1   0  -8 838.005 55.2733   4
  -2   0  -8 475.073 32.0511   2
  -2   0  -8 471.259 34.5932   3
   2   0   8 407.318 33.3276   5
  -2   0  -8 478.269 32.6309   5
  -2   0  -8 450.214 32.9249   1
  -3   0  -8 350.428 26.4603   1
  -3   0  -8 363.722 28.7146   5
  -3   0  -8 382.677 30.7209   3
  -4   0  -8 94.0128 13.7176   2
  -4   0  -8 116.165 16.2718   5
  -4   0  -8 101.302 16.0434   3
  -4   0  -8 85.6807 8.66371   1
  -5   0  -8 45.0450 15.7492   4
  -5   0  -8 37.3864 13.7126   3
  -5   0  -8 38.5069 13.1997   5
  -5  -1   8 56.6178 16.4541   2
  -5  -1   8 77.5805 12.1221   4
  -5   1   8 78.5364 17.5347   5
  -5   1   8 76.9385 16.5203   2
   4  -1  -8 458.748 32.7327   4
  -4  -1   8 395.707 36.4486   2
   4  -1  -8 490.707 38.0846   1
  -4  -1   8 412.859 32.9583   4
  -4   1   8 412.772 36.4428   2
  -4   1   8 429.284 31.5354   4
   3  -1  -8 12.0148 6.74784   1
  -3  -1   8 3.91857 8.58169   2
  -3  -1   8 15.8904 4.09962   3
   3  -1  -8 12.1379 5.08087   4
  -3  -1   8 10.0292 6.02881   4
  -3  -1   8 13.1956 6.61696   1
  -3   1   8 2.02115 6.47320   1
  -3   1   8 11.6831 5.28115   4
  -3   1   8 16.8933 8.76460   2
  -3   1   8 15.5444 5.63982   3
   3   1  -8 11.9222 6.07234   1
  -2  -1   8 665.230 48.6157   4
  -2  -1   8 698.110 50.4438   2
  -2  -1   8 686.152 46.5508   3
  -2  -1   8 702.723 49.8378   1
   2  -1  -8 740.252 48.8268   3
   2  -1  -8 698.634 48.0136   4
   2  -1  -8 665.787 50.1135   1
   2   1  -8 717.710 49.9932   1
  -2   1   8 696.596 48.0527   4
  -2   1   8 708.859 50.2962   2
  -2   1   8 719.203 50.4242   1
   2   1  -8 692.890 46.9179   3
  -2   1   8 704.210 48.0043   3
   2   1  -8 731.048 49.0826   4
  -1  -1   8 559.982 39.7424   4
   1  -1  -8 529.331 38.8257   4
  -1  -1   8 569.302 40.3705   2
  -1  -1   8 565.873 37.9911   3
  -1  -1   8 530.186 38.8063   5
  -1  -1   8 559.199 40.5366   1
   1  -1  -8 521.267 40.6249   1
   1  -1  -8 577.620 39.0940   3
   1  -1  -8 546.511 40.1065   2
  -1   1   8 596.825 41.1038   1
   1   1  -8 591.946 39.5641   4
   1   1  -8 567.701 40.7658   1
   1   1  -8 567.942 40.1113   2
  -1   1   8 584.829 38.8862   3
  -1   1   8 586.119 40.1217   2
   1   1  -8 545.513 37.8025   3
  -1   1   8 565.164 39.2358   4
   0  -1  -8 3165.06 204.992   4
   0  -1  -8 3296.31 205.138   2
   0  -1   8 2990.54 204.941   4
   0  -1   8 3394.89 203.883   5
   0  -1   8 3185.03 205.950   1
   0  -1   8 3110.35 204.297   2
   0  -1  -8 2903.56 205.657   1
   0  -1  -8 3007.95 204.714   3
   0   1  -8 3008.93 205.807   1
   0   1   8 3118.95 205.735   1
   0   1  -8 3092.62 204.788   4
   0   1  -8 2945.26 204.338   3
   0   1  -8 3138.80 204.529   2
   0   1  -8 2959.48 204.108   5
   0   1   8 3228.83 204.938   2
   0   1   8 3406.81 203.195   5
   0   1   8 3339.70 205.156   3
  -1  -1  -8 822.484 56.2739   2
  -1  -1  -8 759.424 56.8960   3
  -1  -1  -8 869.542 54.7686   5
   1  -1   8 804.051 57.0600   1
  -1  -1  -8 794.713 56.9513   1
   1  -1   8 775.857 56.2936   5
   1   1   8 787.412 55.4706   5
  -1   1  -8 846.693 57.3409   3
  -1   1  -8 900.088 56.8845   4
   1   1   8 823.326 57.3013   3
  -1   1  -8 820.547 57.4177   1
  -1   1  -8 901.339 55.8069   5
  -1   1  -8 872.497 55.2655   2
   1   1   8 839.643 56.9055   1
  -2  -1  -8 350.725 24.8611   1
  -2  -1  -8 397.492 25.2370   2
  -2  -1  -8 351.271 26.7881   3
  -2  -1  -8 377.034 24.3660   5
  -2   1  -8 312.427 24.9159   5
  -2   1  -8 282.734 26.3389   3
  -2   1  -8 311.641 25.3864   1
   2   1   8 264.468 24.5238   5
  -2   1  -8 322.575 25.3579   4
  -2   1  -8 328.247 23.0925   2
  -3  -1  -8 69.0904 11.3628   5
  -3  -1  -8 67.0949 12.0756   3
  -3  -1  -8 82.0212 8.61090   1
  -3   1  -8 89.3063 9.98662   1
  -3   1  -8 74.4972 12.6854   5
  -3   1  -8 82.6513 13.5999   3
  -3   1  -8 67.7867 9.30720   2
  -3   1  -8 77.0552 10.3510   1
  -4  -1  -8 245.448 25.2170   3
  -4  -1  -8 261.626 23.8310   2
  -4  -1  -8 250.699 23.3705   5
  -4   1  -8 242.788 19.7607   1
  -4   1  -8 229.106 23.7412   5
  -4   1  -8 242.498 26.3236   3
  -5  -1  -8 31.8790 11.5760   5
  -5  -1  -8 32.6798 11.1139   4
  -5  -1  -8 12.4370 11.7517   3
  -5   1  -8 12.9716 12.6316   3
  -5   1  -8 36.5063 14.0116   5
  -5  -2   8 113.188 15.8127   4
  -5  -2   8 76.3353 18.3061   2
  -5   2   8 75.0027 19.0187   5
  -5   2   8 85.3487 17.1986   2
  -4  -2   8 113.473 20.6031   2
  -4  -2   8 157.531 16.7030   4
  -4   2   8 141.054 12.8756   4
  -4   2   8 150.282 22.2688   5
  -4   2   8 122.499 18.7146   2
   3  -2  -8 363.151 28.1156   4
   3  -2  -8 339.064 31.2914   1
  -3  -2   8 354.466 33.0381   2
  -3  -2   8 336.693 30.2114   1
  -3  -2   8 378.757 26.3633   3
  -3  -2   8 367.807 30.4629   4
  -3   2   8 430.287 32.6626   2
  -3   2   8 454.052 32.5344   1
  -3   2   8 464.611 28.6331   4
   3   2  -8 474.359 31.4873   1
  -2  -2   8 206.598 18.7283   4
  -2  -2   8 201.792 20.4400   2
   2  -2  -8 215.378 16.9824   4
   2  -2  -8 203.285 20.0930   1
   2  -2  -8 207.743 18.8381   3
  -2  -2   8 203.843 19.1804   1
   2   2  -8 225.729 19.6052   1
  -2   2   8 230.688 18.0471   3
  -2   2   8 226.153 19.7013   2
  -2   2   8 240.776 20.6792   1
  -1  -2   8 1316.40 91.0080   2
   1  -2  -8 1317.41 90.2764   3
   1  -2  -8 1398.16 89.7848   4
  -1  -2   8 1300.92 90.3643   4
  -1  -2   8 1369.22 91.4217   1
  -1  -2   8 1300.29 89.7291   5
   1  -2  -8 1347.13 91.0568   2
   1  -2  -8 1356.98 92.0395   1
   1   2  -8 1419.72 91.8275   1
  -1   2   8 1371.96 90.0690   3
  -1   2   8 1391.44 91.9701   1
   1   2  -8 1368.54 91.1261   2
  -1   2   8 1335.59 90.7613   2
   1   2  -8 1348.58 90.5265   4
   1   2  -8 1340.66 88.2559   3
   0  -2   8 822.852 51.7626   5
   0  -2   8 761.337 53.7064   1
   0  -2   8 763.533 51.9367   2
   0  -2   8 787.419 53.0045   4
   0  -2  -8 754.293 53.9375   1
   0  -2  -8 694.987 52.4773   3
   0  -2  -8 762.939 52.8452   2
   0   2  -8 823.643 52.8793   4
   0   2  -8 760.391 52.0460   3
   0   2  -8 756.800 53.9040   1
   0   2   8 780.423 53.1780   2
   0   2  -8 717.201 52.0103   5
   0   2   8 777.917 53.7076   1
   0   2   8 778.465 52.7570   3
   0   2   8 775.244 50.2622   5
   0   2  -8 765.262 52.0919   2
  -1  -2  -8 393.976 27.1054   5
   1  -2   8 355.260 29.5835   5
  -1  -2  -8 371.079 29.9251   3
   1  -2   8 397.114 29.9723   4
  -1  -2  -8 367.282 30.1467   1
   1   2   8 426.504 30.2539   1
  -1   2  -8 457.355 29.2482   5
  -1   2  -8 448.036 31.5491   1
   1   2   8 382.937 27.7390   5
  -1   2  -8 439.039 27.5798   2
  -1   2  -8 467.063 29.8836   4
  -2  -2  -8 442.830 30.4644   5
  -2  -2  -8 455.774 33.5926   3
  -2  -2  -8 447.846 31.8576   1
  -2   2  -8 428.775 32.1206   5
  -2   2  -8 426.840 31.7329   4
  -2   2  -8 432.690 33.1751   1
  -3  -2  -8 193.523 14.5512   1
  -3  -2  -8 196.325 19.4854   3
  -3  -2  -8 190.828 17.0020   5
  -3   2  -8 162.653 16.4458   1
  -3   2  -8 169.332 19.0912   5
  -3   2  -8 167.515 17.2852   1
  -4  -2  -8 78.5594 13.9018   2
  -4  -2  -8 85.9877 13.8212   5
  -4  -2  -8 60.1735 13.2997   3
  -4   2  -8 72.6089 14.2452   5
  -4   2  -8 58.9390 10.1088   1
  -5  -2  -8 51.1988 13.0100   5
  -5  -2  -8 58.2957 13.3867   4
  -5  -2  -8 66.4170 14.4829   3
  -5   2  -8 56.4269 9.24064   1
  -5   2  -8 81.7936 18.0656   5
  -5  -3   8 -1.5653 8.46943   4
  -5  -3   8 20.5947 14.5100   2
  -5   3   8 36.4032 15.2981   5
  -5   3   8 14.7473 12.3362   2
  -5   3   8 11.8892 9.65201   1
  -4  -3   8 274.974 24.5442   4
  -4  -3   8 268.645 28.3241   2
  -4   3   8 262.279 26.1791   2
  -4   3   8 234.935 27.3737   5
  -3  -3   8 186.623 21.7172   2
   3  -3  -8 218.701 21.3959   1
   3  -3  -8 214.398 16.3387   4
  -3  -3   8 225.033 19.7887   1
  -3  -3   8 212.734 20.1381   4
  -3   3   8 215.013 20.7236   2
   3   3  -8 203.912 19.4195   1
  -3   3   8 203.085 21.9920   5
  -3   3   8 192.668 21.0492   1
  -2  -3   8 397.323 31.2215   1
   2  -3  -8 409.862 32.5502   1
   2  -3  -8 388.045 28.3895   4
  -2  -3   8 415.908 32.8776   2
   2  -3  -8 429.101 31.5055   3
  -2  -3   8 384.584 30.7102   4
  -2   3   8 378.500 31.3568   2
  -2   3   8 415.718 32.5837   1
  -2   3   8 392.486 31.7321   5
   2   3  -8 428.436 31.8033   1
   1  -3  -8 45.0449 8.78174   3
   1  -3  -8 44.1914 6.99169   4
  -1  -3   8 35.1534 7.57095   4
   1  -3  -8 25.0102 8.52272   1
  -1  -3   8 39.4117 8.82518   1
  -1  -3   8 34.1953 8.14442   2
   1   3  -8 61.1547 5.39435   3
  -1   3   8 51.2130 9.37413   1
   1   3  -8 70.0405 10.6870   1
  -1   3   8 40.3383 8.33090   2
   1   3  -8 60.0749 8.99043   2
   1   3  -8 47.3519 8.35283   5
   0  -3  -8 1262.43 86.8553   3
   0  -3   8 1292.26 86.7273   4
   0  -3  -8 1345.20 88.2115   1
   0  -3   8 1331.03 87.8849   1
   0  -3   8 1317.09 85.9519   2
   0   3  -8 1345.75 88.5716   1
   0   3   8 1254.08 83.5364   5
   0   3   8 1167.00 83.7873   5
   0   3  -8 1381.77 86.8612   4
   0   3  -8 1285.75 86.1598   5
  -1  -3  -8 751.884 53.0168   1
   1  -3   8 760.195 52.3409   4
  -1  -3  -8 795.674 52.9910   3
  -1   3  -8 753.332 53.7786   1
  -1   3  -8 731.866 51.7582   4
  -1   3  -8 736.656 51.6447   5
  -2  -3  -8 901.906 61.0964   1
  -2  -3  -8 916.784 58.9347   5
  -2  -3  -8 831.010 62.0511   3
  -2   3  -8 955.201 61.7101   5
  -2   3  -8 937.905 62.9634   1
  -2   3  -8 831.915 62.4628   1
  -2   3  -8 842.075 60.4353   4
  -3  -3  -8 142.059 12.9912   5
  -3  -3  -8 135.386 11.5102   1
  -3  -3  -8 151.418 16.4515   3
  -3   3  -8 116.485 16.8328   5
   3   3   8 98.0706 9.54239   1
  -3   3  -8 114.426 14.7789   1
  -4  -3  -8 177.899 21.8181   4
  -4  -3  -8 183.476 19.1121   5
  -4  -3  -8 203.432 21.2145   3
  -4   3  -8 173.806 18.8263   1
  -4   3  -8 192.758 22.3717   5
  -5  -3  -8 31.8378 12.1219   4
  -5  -3  -8 31.0391 13.0275   2
  -5  -3  -8 16.0885 10.7893   3
  -5   3  -8 4.38718 13.4662   5
  -5   3  -8 28.5155 8.65208   1
  -5  -4   8 52.1028 13.0839   4
  -5  -4   8 41.5571 15.0447   2
  -5   4   8 45.7169 18.4414   5
  -5   4   8 25.0545 13.9124   2
  -5   4   8 40.9770 11.9238   1
  -4  -4   8 14.2061 9.30338   4
  -4  -4   8 22.8938 11.8891   2
  -4   4   8 20.0163 14.6112   5
  -4   4   8 17.4579 10.3529   1
  -4   4   8 16.0911 11.0871   2
  -3  -4   8 246.156 24.9735   2
   3  -4  -8 206.905 15.9612   4
  -3  -4   8 205.224 19.9981   1
  -3  -4   8 214.088 20.6970   4
   3  -4  -8 225.525 22.7958   1
  -3   4   8 206.825 21.7445   2
   3   4  -8 204.936 20.1430   1
  -3   4   8 216.742 22.5313   1
  -3   4   8 208.294 23.5839   5
  -2  -4   8 107.298 13.3452   1
  -2  -4   8 108.768 15.5031   2
   2  -4  -8 102.721 14.6770   3
  -2  -4   8 102.348 12.9102   4
   2  -4  -8 94.5271 14.4294   1
   2  -4  -8 100.101 9.77827   4
   2   4  -8 99.9659 13.6663   1
  -2   4   8 77.6469 13.9057   5
  -2   4   8 82.8418 14.5322   2
  -1  -4   8 632.849 46.0710   1
  -1  -4   8 579.184 44.7577   4
   1  -4  -8 625.608 45.4703   3
   1  -4  -8 610.626 46.9304   1
  -1  -4   8 633.753 45.6256   2
  -1   4   8 667.061 46.0275   2
   1   4  -8 670.276 46.9039   1
   1   4  -8 578.058 44.6743   5
   1   4  -8 683.600 42.2313   3
  -1   4   8 597.062 43.4439   5
   0  -4  -8 23.9836 7.14423   3
   0  -4   8 29.7402 6.49946   2
   0  -4   8 34.7482 7.72190   4
   0  -4  -8 35.9597 8.88043   1
   0   4  -8 44.3999 9.95754   1
   0   4  -8 30.7628 7.60359   5
  -1  -4  -8 528.315 38.6464   1
   1  -4   8 560.821 37.6384   4
  -1  -4  -8 510.001 37.8309   3
   1  -4   8 526.089 34.2560   2
  -1   4  -8 489.424 39.2871   1
  -1   4  -8 504.226 36.8634   5
  -1   4  -8 487.480 36.9130   4
  -2  -4  -8 201.121 17.7902   1
  -2  -4  -8 202.296 13.4062   5
  -2  -4  -8 182.564 17.8756   3
  -2   4  -8 175.665 19.3673   1
  -2   4  -8 184.518 16.3369   4
  -2   4  -8 189.000 18.0218   5
  -2   4  -8 163.246 18.5178   1
  -3  -4  -8 289.343 25.8825   3
  -3  -4  -8 294.699 22.6915   5
  -3  -4  -8 313.238 23.0909   1
  -3   4  -8 286.602 26.5413   5
  -3   4  -8 299.751 26.5246   1
  -4  -4  -8 53.4444 12.0365   3
  -4  -4  -8 26.3363 12.0507   4
  -4   4  -8 39.5233 15.0714   5
  -4   4  -8 30.5945 9.82757   1
  -5  -5   8 8.21851 13.2143   2
  -5  -5   8 3.72276 10.5559   4
  -5   5   8 -5.5208 12.7896   5
  -5   5   8 10.8027 11.5092   1
  -5   5   8 5.90889 12.6983   2
  -4  -5   8 69.9145 13.6654   4
  -4  -5   8 111.452 19.6328   2
  -4   5   8 32.6817 13.1147   2
  -4   5   8 56.5411 14.0279   1
  -4   5   8 73.1326 17.2296   5
  -3  -5   8 30.2370 10.4358   4
  -3  -5   8 17.5699 10.3372   2
   3  -5  -8 26.7619 10.7968   1
   3   5  -8 13.1187 9.33321   1
  -3   5   8 33.3179 11.7823   1
  -3   5   8 14.0221 10.9166   2
  -3   5   8 34.6407 12.3254   5
   2  -5  -8 332.810 28.1397   1
   2  -5  -8 274.359 26.5830   3
  -2  -5   8 302.021 25.6891   1
  -2  -5   8 292.929 25.5492   4
  -2  -5   8 295.249 26.6410   2
   2  -5  -8 303.361 21.7643   4
  -2   5   8 246.374 24.1279   5
  -2   5   8 287.436 27.5356   1
   2   5  -8 268.346 25.2518   1
  -1  -5   8 27.5179 8.75446   2
  -1  -5   8 4.24345 6.06485   1
   1  -5  -8 16.5049 8.51798   1
   1  -5  -8 10.8387 7.55432   3
  -1  -5   8 9.18356 7.58363   4
   1   5  -8 28.9150 4.52152   3
  -1   5   8 24.9145 5.87120   5
  -1   5   8 32.5439 9.97827   2
   1   5  -8 22.2231 8.28212   5
  -1   5   8 28.2521 10.6740   1
   1   5  -8 34.3565 9.39397   1
   0  -5   8 772.219 52.4658   4
   0  -5  -8 731.863 53.0606   3
   0  -5   8 786.967 51.8979   2
   0  -5  -8 740.481 54.5091   1
   0   5  -8 700.874 54.3512   1
   0   5  -8 699.111 52.1154   5
   0   5   8 739.249 54.1374   1
   1  -5   8 140.709 15.4677   4
   1  -5   8 142.422 12.2911   2
  -1  -5  -8 164.062 17.6018   1
  -1  -5  -8 141.438 16.4246   3
  -1   5  -8 176.942 19.1684   1
  -1   5  -8 171.436 16.8141   5
   1   5   8 176.859 17.3248   1
   2  -5   8 301.507 25.5444   4
  -2  -5  -8 336.814 27.5017   3
  -2  -5  -8 350.946 27.2837   1
  -2   5  -8 351.960 29.2744   1
   2   5   8 333.346 26.0497   1
  -2   5  -8 294.184 28.8999   1
  -2   5  -8 326.195 26.9568   5
  -3  -5  -8 95.0012 15.2309   3
  -3  -5  -8 104.066 17.6814   4
  -3  -5  -8 97.6498 12.0426   1
  -3   5  -8 118.318 18.4983   5
  -3   5  -8 131.121 17.8636   1
  -4  -5  -8 43.6600 11.7144   3
  -4  -5  -8 42.6002 14.0279   4
  -4   5  -8 15.5616 14.3696   5
  -4   5  -8 22.9480 10.0971   1
  -4  -6   8 5.94339 12.5251   2
  -4  -6   8 20.8183 11.4637   4
  -4   6   8 -0.9266 11.7458   2
  -4   6   8 -1.3787 11.1224   1
  -4   6   8 5.61811 13.0561   5
  -3  -6   8 177.227 20.8837   4
   3  -6  -8 208.684 24.0688   1
  -3  -6   8 196.990 24.8860   2
  -3   6   8 167.527 22.0701   5
  -3   6   8 212.689 22.8146   2
  -3   6   8 182.062 23.6550   1
  -2  -6   8 15.7858 9.59751   4
   2  -6  -8 28.2179 11.2876   1
   2  -6  -8 40.6612 12.7114   3
  -2  -6   8 28.3330 10.4618   1
  -2  -6   8 37.3143 11.6320   2
  -2   6   8 60.9337 12.4604   2
  -2   6   8 72.3370 15.5622   1
   2   6  -8 50.1612 11.5080   1
  -2   6   8 43.0415 10.2763   5
   1  -6  -8 420.240 34.1128   3
   1  -6  -8 386.033 35.2033   1
  -1  -6   8 381.555 33.1802   2
  -1  -6   8 390.386 32.0873   4
   1   6  -8 413.057 28.4423   3
  -1   6   8 399.679 29.0606   5
   1   6  -8 457.639 34.8634   1
  -1   6   8 470.431 36.3268   1
   1   6  -8 349.196 32.1142   5
   0  -6   8 159.733 17.0046   4
   0  -6  -8 140.426 16.8117   3
   0  -6  -8 166.525 19.8798   1
   0  -6   8 132.985 15.7836   2
   0   6  -8 128.213 17.4076   5
   0   6  -8 154.190 19.5790   1
   0   6   8 164.232 11.0474   5
   0   6   8 157.249 18.9535   1
  -1  -6  -8 104.791 16.1316   1
   1  -6   8 108.297 10.4226   2
  -1  -6  -8 112.451 15.3526   3
   1  -6   8 93.3918 13.7612   4
   1  -6   8 117.341 10.9721   2
  -1   6  -8 129.323 17.9895   1
  -1   6  -8 101.977 14.3400   5
   1   6   8 88.6025 14.9645   1
  -2  -6  -8 281.356 24.8949   3
  -2  -6  -8 275.495 26.1706   4
   2  -6   8 258.165 22.2906   4
  -2  -6  -8 271.787 24.8200   1
  -2   6  -8 265.730 25.3100   5
  -2   6  -8 279.432 27.4333   1
  -3  -6  -8 114.803 16.5863   3
  -3  -6  -8 128.186 19.5903   4
  -3  -6  -8 110.459 13.9561   1
  -3   6  -8 93.9663 17.7325   5
  -3   6  -8 130.894 19.3261   1
  -4  -6  -8 22.4657 12.6576   4
  -4  -6  -8 27.8861 10.4808   3
  -4   6  -8 5.71537 13.3001   5
  -4   6  -8 20.1513 11.4437   1
  -4  -7   8 62.3296 18.2677   2
  -4  -7   8 23.1654 12.2839   4
  -4   7   8 29.3499 14.0651   1
  -4   7   8 32.7010 14.1536   2
  -4   7   8 12.5075 14.1110   5
  -3  -7   8 28.3614 11.1627   4
  -3  -7   8 24.5429 14.2891   2
   3  -7  -8 34.6344 13.5875   1
  -3   7   8 9.03125 12.3615   2
  -3   7   8 26.6625 12.3424   5
  -3   7   8 22.2311 13.6903   1
  -2  -7   8 141.978 18.7534   4
   2  -7  -8 135.956 13.6546   4
   2  -7  -8 139.406 21.0746   3
   2  -7  -8 170.207 22.1512   1
  -2  -7   8 124.790 20.2797   2
  -2   7   8 117.045 19.6057   1
   2   7  -8 152.482 19.5838   1
  -2   7   8 114.367 15.6852   5
  -1  -7   8 59.1730 12.7092   4
   1  -7  -8 60.4414 10.9148   4
   1  -7  -8 63.7275 15.1948   1
   1  -7  -8 59.1939 14.1176   3
  -1  -7   8 50.5369 12.4674   2
   1   7  -8 63.2712 12.6919   5
  -1   7   8 60.6279 15.4597   1
  -1   7   8 54.9724 9.32236   5
   1   7  -8 81.4859 15.4088   1
   0  -7  -8 255.748 25.0514   3
   0  -7  -8 270.655 24.8874   4
   0  -7  -8 260.763 27.4920   1
   0  -7   8 286.683 24.5240   2
   0  -7   8 279.427 24.9703   4
   0   7   8 274.919 27.3814   1
   0   7  -8 257.460 24.5068   5
   0   7  -8 288.686 28.2303   1
  -1  -7  -8 111.374 18.4468   1
   1  -7   8 115.651 15.1766   4
  -1  -7  -8 113.676 16.5808   3
  -1  -7  -8 146.538 17.1811   4
  -1   7  -8 130.122 18.0324   5
  -1   7  -8 118.194 19.0000   1
   1   7   8 104.140 16.9509   1
  -2  -7  -8 167.649 19.0435   3
  -2  -7  -8 176.608 21.3082   4
   2  -7   8 136.930 16.1409   4
  -2  -7  -8 158.790 18.8086   1
  -2   7  -8 166.584 22.8366   1
  -2   7  -8 131.424 19.8259   5
  -3  -7  -8 28.0491 13.2058   4
  -3  -7  -8 12.5840 10.0610   3
  -3  -7  -8 17.7678 7.98888   1
  -3   7  -8 5.14010 13.4192   5
  -3   7  -8 13.7087 11.4106   1
  -3  -8   8 74.9036 18.6765   2
  -3  -8   8 66.0820 15.1953   4
   3  -8  -8 47.1805 15.4865   1
  -3   8   8 93.4693 20.6706   1
  -3   8   8 73.0136 14.5856   5
   2  -8  -8 12.0791 12.0856   3
  -2  -8   8 17.2157 9.97051   4
  -2  -8   8 11.9024 11.6131   2
   2  -8  -8 18.1719 13.3151   1
  -2   8   8 1.14326 13.2035   1
  -2   8   8 9.66438 8.86276   5
  -1  -8   8 91.3530 15.4897   4
   1  -8  -8 94.1274 14.1985   4
  -1  -8   8 111.073 18.8760   2
   1  -8  -8 104.069 18.7270   1
   1  -8  -8 98.7741 17.8952   3
   1   8  -8 124.513 19.6096   1
  -1   8   8 73.0446 17.5212   1
   1   8  -8 99.6641 17.3222   5
   0  -8  -8 16.5544 11.0542   3
   0  -8   8 23.2490 9.98903   4
   0  -8  -8 15.9977 11.6011   1
   0  -8   8 33.5299 10.2812   2
   0  -8  -8 25.1723 9.82511   4
   0   8   8 16.5580 12.1628   1
   0   8  -8 17.4209 10.9018   5
   0   8  -8 14.5622 13.0505   1
  -1  -8  -8 90.5992 15.9042   1
   1  -8   8 63.7249 12.0707   4
  -1  -8  -8 89.3920 15.8938   4
  -1  -8  -8 54.3873 13.9267   3
  -1   8  -8 81.1026 16.0334   5
  -1   8  -8 97.1322 19.5024   1
  -2  -8  -8 14.5262 11.7813   4
  -2  -8  -8 23.3851 10.5647   3
  -2  -8  -8 25.2441 10.5984   1
  -2   8  -8 7.50418 11.5805   5
  -2   8  -8 14.1050 12.9900   1
  -3  -8  -8 78.5236 18.4379   4
  -3  -8  -8 65.6822 14.0695   3
  -3  -8  -8 73.3810 13.2944   1
  -3   8  -8 22.7049 14.5074   5
  -3   8  -8 73.1858 16.7185   1
  -2  -9   8 10.5290 9.82728   4
   2  -9  -8 20.6092 12.8722   1
  -2  -9   8 16.9235 12.6750   2
   2  -9  -8 31.7711 15.6614   3
  -2   9   8 4.67862 12.2697   1
   1  -9  -8 27.7298 13.5430   1
  -1  -9   8 37.0472 12.9616   2
  -1  -9   8 30.1817 12.0474   4
   1  -9  -8 30.5164 14.3936   3
   1   9  -8 29.1725 12.3938   5
   1   9  -8 28.6694 12.8770   1
  -1   9   8 33.2634 14.8225   1
   0  -9  -8 12.3329 12.2267   3
   0  -9   8 25.6712 11.0878   4
   0  -9  -8 44.3872 11.8627   4
   0  -9  -8 25.3171 13.0199   1
   0   9  -8 49.2247 15.8878   1
   0   9  -8 26.4650 13.3440   5
  -1  -9  -8 39.6936 12.3997   3
  -1  -9  -8 45.4466 13.2922   4
   1  -9   8 23.4281 11.4990   4
  -1  -9  -8 52.4179 14.5856   1
  -1   9  -8 29.5429 14.0661   1
  -1   9  -8 24.2517 13.9603   5
  -2  -9  -8 40.5599 12.6183   3
  -2  -9  -8 26.8290 12.9901   4
  -2  -9  -8 23.5728 11.6817   1
  -2   9  -8 4.56039 14.8211   5
  -2   9  -8 28.1264 14.6088   1
  -1 -10   8 -2.0568 9.54061   4
   1 -10  -8 -11.515 11.7341   1
   1 -10  -8 -23.073 10.8558   3
  -1  10   8 2.78329 15.0165   1
   1  10  -8 22.6610 11.3181   5
   0 -10  -8 9.25392 10.4778   4
   0 -10  -8 4.27324 12.1798   1
   0 -10  -8 10.7042 12.5601   3
   0 -10   8 35.3524 12.2924   4
   0  10  -8 13.3626 13.8494   1
   0  10  -8 23.3999 12.3683   5
  -5   0   9 181.072 18.5068   4
  -5   0   9 165.609 23.0718   2
  -4   0   9 132.696 14.7183   4
  -4   0   9 125.921 20.0418   2
  -3   0   9 33.6195 7.53781   4
  -3   0   9 36.4501 6.57810   3
   3   0  -9 27.6349 7.57968   1
  -3   0   9 51.3879 11.9189   2
  -3   0   9 41.3248 9.06021   1
  -2   0   9 793.868 58.1299   2
  -2   0   9 804.945 56.2336   4
   2   0  -9 815.439 57.9409   1
   2   0  -9 825.500 55.5611   3
  -2   0   9 809.367 57.8207   1
  -2   0   9 832.443 55.0317   3
   2   0  -9 844.070 56.3364   4
  -1   0   9 1101.05 75.8344   1
   1   0  -9 1126.54 74.3809   4
  -1   0   9 1066.17 73.7757   5
   1   0  -9 1115.11 75.3079   2
  -1   0   9 1107.05 74.5043   4
  -1   0   9 1151.09 75.3515   2
   1   0  -9 1018.18 75.5221   1
  -1   0   9 1136.86 73.6321   3
   1   0  -9 1124.51 73.6366   3
   0   0  -9 912.547 60.5975   2
   0   0  -9 908.506 60.8122   4
   0   0   9 878.818 60.3994   2
   0   0  -9 760.793 59.4706   5
   0   0  -9 890.652 61.9128   1
   0   0   9 896.866 60.7077   3
   0   0   9 1014.06 59.3167   5
   0   0   9 929.003 61.8974   1
   0   0  -9 849.871 60.3333   3
   1   0   9 119.514 11.9072   5
  -1   0  -9 133.348 11.6427   2
  -1   0  -9 136.428 13.2964   4
  -1   0  -9 129.853 13.6311   1
  -1   0  -9 129.290 13.4863   3
  -1   0  -9 144.189 11.3151   5
  -2   0  -9 386.852 26.4639   5
  -2   0  -9 338.321 27.0611   1
   2   0   9 307.172 27.3142   5
  -2   0  -9 347.474 28.7064   3
  -2   0  -9 392.481 26.1735   2
  -3   0  -9 393.039 30.3242   5
  -3   0  -9 384.930 28.9495   1
  -3   0  -9 394.018 32.2245   3
  -4   0  -9 419.980 33.2990   5
  -4   0  -9 396.978 28.1024   1
  -4   0  -9 380.142 31.4992   2
  -4   0  -9 382.270 34.7319   3
  -5   0  -9 31.4625 12.6722   3
  -5   0  -9 2.31465 11.0886   5
  -5  -1   9 23.9049 14.3298   2
  -5  -1   9 25.0281 9.08999   4
  -5   1   9 28.4102 12.0997   2
  -4  -1   9 69.3763 11.2129   4
  -4  -1   9 72.6871 15.4452   2
  -4   1   9 66.9729 10.4290   4
  -4   1   9 63.2509 14.3961   2
   3  -1  -9 828.435 57.4826   1
  -3  -1   9 792.816 55.5518   4
  -3  -1   9 815.095 53.0828   3
  -3  -1   9 790.987 58.1166   2
   3  -1  -9 832.692 54.7359   4
  -3  -1   9 818.632 56.7813   1
  -3   1   9 761.716 54.7157   3
  -3   1   9 752.884 57.5056   2
  -3   1   9 779.997 54.4835   4
   3   1  -9 739.569 56.3132   1
   2  -1  -9 525.880 36.4295   1
   2  -1  -9 567.416 34.1386   4
   2  -1  -9 520.715 34.3177   3
  -2  -1   9 550.883 37.2336   2
  -2  -1   9 558.694 34.9200   4
  -2  -1   9 525.881 32.1104   3
  -2  -1   9 498.040 35.8653   1
  -2   1   9 404.846 33.3275   4
   2   1  -9 403.902 32.1310   3
  -2   1   9 398.401 35.0593   2
  -2   1   9 406.286 33.0418   3
   2   1  -9 397.472 35.0680   1
  -2   1   9 421.530 35.6491   1
  -1  -1   9 1899.57 118.261   1
   1  -1  -9 1781.50 118.366   1
   1  -1  -9 1854.59 116.514   4
  -1  -1   9 1846.34 117.550   2
  -1  -1   9 1816.83 116.926   4
  -1  -1   9 1680.81 116.056   5
  -1  -1   9 1831.11 115.490   3
   1  -1  -9 1805.45 116.356   3
   1  -1  -9 1765.62 117.496   2
   1   1  -9 1672.38 115.158   3
   1   1  -9 1668.38 117.236   2
  -1   1   9 1744.88 118.083   1
  -1   1   9 1769.15 116.131   3
   1   1  -9 1795.03 116.858   4
  -1   1   9 1676.85 117.090   2
   1   1  -9 1661.76 117.843   1
  -1   1   9 1685.09 116.444   4
   0  -1   9 987.573 67.6440   2
   0  -1   9 1107.94 67.1569   5
   0  -1  -9 1041.99 68.4543   2
   0  -1  -9 1018.03 69.5764   1
   0  -1   9 1000.15 69.3790   1
   0  -1  -9 961.158 68.0772   3
   0  -1   9 1007.00 68.6340   4
   0  -1  -9 1034.58 68.4781   4
   0   1  -9 908.598 69.1064   1
   0   1  -9 1020.77 68.2390   4
   0   1   9 1124.59 66.4011   5
   0   1  -9 996.660 67.8400   2
   0   1   9 986.243 69.2290   1
   0   1  -9 932.598 67.4283   5
   0   1   9 981.335 68.2195   2
   0   1   9 1039.17 68.3743   3
   0   1  -9 967.290 67.7522   3
   1  -1   9 1048.95 68.8540   5
  -1  -1  -9 1115.55 70.0570   1
  -1  -1  -9 1179.37 69.1586   2
  -1  -1  -9 1170.85 70.2183   3
  -1   1  -9 969.023 67.5924   2
   1   1   9 899.666 67.6594   5
  -1   1  -9 1015.60 69.1945   4
  -1   1  -9 904.477 69.6350   1
  -1   1  -9 952.540 69.4552   3
  -1   1  -9 1000.17 67.8834   5
  -2  -1  -9 655.608 46.3132   3
  -2  -1  -9 639.042 44.5803   1
  -2  -1  -9 684.095 44.3785   2
  -2  -1  -9 633.433 43.2089   5
  -2   1  -9 627.398 45.1762   1
  -2   1  -9 641.131 44.2074   5
   2   1   9 556.528 44.0786   5
  -2   1  -9 601.042 45.9724   3
  -2   1  -9 654.577 42.6410   2
  -3  -1  -9 307.552 23.9736   1
  -3  -1  -9 316.517 25.3658   5
  -3  -1  -9 304.183 27.3501   3
  -3   1  -9 348.704 23.6146   2
  -3   1  -9 300.257 28.5533   3
  -3   1  -9 332.589 26.8557   5
  -3   1  -9 333.824 25.5359   1
  -3   1  -9 312.955 23.9757   2
  -4  -1  -9 42.3052 12.7878   3
  -4  -1  -9 28.2691 9.85043   2
  -4  -1  -9 34.6506 10.4860   5
  -4   1  -9 44.6259 7.94286   1
  -4   1  -9 44.8747 12.7518   5
  -4   1  -9 46.8591 13.3910   3
  -5  -1  -9 53.7057 13.2470   5
  -5  -1  -9 66.2218 13.6585   4
  -5  -1  -9 59.9648 15.0557   3
  -5   1  -9 50.6610 15.0755   3
  -5   1  -9 37.4057 14.4548   5
  -5  -2   9 112.378 16.7335   4
  -5  -2   9 168.891 24.5083   2
  -5   2   9 100.369 19.4799   2
  -5   2   9 110.065 21.6670   5
  -4  -2   9 166.134 21.3997   2
  -4  -2   9 134.170 16.8842   4
  -4   2   9 161.982 19.6927   2
  -4   2   9 156.590 14.5009   4
   3  -2  -9 115.581 11.0891   4
  -3  -2   9 107.288 17.2363   2
  -3  -2   9 110.388 7.76557   3
   3  -2  -9 82.2279 14.0994   1
  -3  -2   9 93.9282 13.0899   1
  -3  -2   9 100.609 13.3173   4
  -3   2   9 64.4653 13.5331   2
   3   2  -9 83.7399 13.1431   1
  -3   2   9 78.0718 10.6645   4
   2  -2  -9 371.576 27.4069   4
   2  -2  -9 396.587 31.1312   1
  -2  -2   9 405.262 29.5007   4
  -2  -2   9 375.345 31.1054   2
  -2  -2   9 401.337 30.2129   1
   2  -2  -9 384.405 29.1322   3
  -2   2   9 335.615 29.5230   2
  -2   2   9 361.415 30.4545   1
   2   2  -9 379.055 30.1035   1
  -1  -2   9 698.887 47.1331   2
   1  -2  -9 721.239 48.5868   1
   1  -2  -9 728.186 45.9405   4
   1  -2  -9 691.750 46.4792   3
  -1  -2   9 660.141 47.5177   1
   1   2  -9 618.558 47.5151   1
  -1   2   9 635.951 45.8202   3
  -1   2   9 651.251 46.9723   2
   1   2  -9 596.977 44.0171   3
   1   2  -9 655.323 46.9758   2
  -1   2   9 639.018 47.7524   1
   0  -2   9 444.109 30.4839   4
   0  -2   9 437.353 31.1497   1
   0  -2   9 448.689 29.1686   2
   0  -2  -9 420.603 30.0245   3
   0  -2  -9 483.740 30.5156   2
   0  -2  -9 439.326 30.1278   4
   0  -2  -9 451.133 31.5243   1
   0  -2   9 443.392 28.6737   5
   0   2   9 364.739 29.8234   2
   0   2   9 354.963 29.3667   3
   0   2  -9 350.968 28.9227   5
   0   2  -9 363.281 28.7853   3
   0   2  -9 379.801 29.5508   4
   0   2  -9 354.603 28.6903   2
   0   2  -9 392.079 31.1912   1
   0   2   9 410.435 27.0204   5
   0   2   9 353.026 30.6592   1
   1  -2   9 432.661 30.9728   4
  -1  -2  -9 407.418 30.7168   3
  -1  -2  -9 431.981 31.1584   1
  -1  -2  -9 482.051 30.9389   2
   1  -2   9 420.011 27.9097   2
  -1  -2  -9 425.567 27.6748   5
  -1   2  -9 431.163 29.7595   5
  -1   2  -9 427.836 31.4509   3
  -1   2  -9 395.505 30.0569   4
   1   2   9 344.745 28.0271   5
  -1   2  -9 379.228 31.3270   1
  -1   2  -9 405.292 28.1652   2
  -2  -2  -9 608.522 38.4830   5
  -2  -2  -9 553.206 40.3409   1
  -2  -2  -9 523.245 41.2153   3
  -2   2  -9 539.863 41.3853   1
  -2   2  -9 571.349 40.4178   5
  -3  -2  -9 262.683 21.1292   5
  -3  -2  -9 252.388 20.0518   1
  -3  -2  -9 280.687 24.7397   3
  -3   2  -9 271.562 22.6645   1
  -3   2  -9 245.293 23.6901   1
  -3   2  -9 258.613 23.0995   5
  -4  -2  -9 254.165 24.2323   5
  -4  -2  -9 294.142 27.3330   3
  -4   2  -9 259.627 23.2864   1
  -4   2  -9 308.139 27.8606   5
  -5  -2  -9 37.1499 12.8409   3
  -5  -2  -9 22.6948 11.4162   4
  -5   2  -9 16.6461 12.5018   3
  -5   2  -9 18.1582 14.1268   5
  -5   2  -9 36.1754 7.93393   1
  -5  -3   9 26.3682 10.6217   4
  -5  -3   9 18.0876 14.9138   2
  -5   3   9 9.21246 12.4846   2
  -5   3   9 24.3647 10.9731   1
  -5   3   9 24.0285 16.3290   5
  -4  -3   9 49.8236 11.9871   4
  -4  -3   9 81.4573 17.1563   2
  -4   3   9 86.0697 15.9218   2
  -4   3   9 74.7404 16.4473   5
  -3  -3   9 764.788 52.0526   1
   3  -3  -9 717.206 52.6373   3
  -3  -3   9 733.603 54.0171   2
   3  -3  -9 735.341 53.4025   1
  -3  -3   9 735.509 52.0386   4
   3  -3  -9 693.298 48.4967   4
  -3   3   9 658.804 53.0755   5
  -3   3   9 664.196 52.0243   2
   3   3  -9 702.625 51.8390   1
  -3   3   9 733.946 53.5403   1
   2  -3  -9 336.530 24.1780   4
  -2  -3   9 326.076 26.6016   4
  -2  -3   9 326.694 26.9280   1
  -2  -3   9 312.456 27.8383   2
   2  -3  -9 337.503 28.3874   1
   2  -3  -9 339.458 27.3492   3
  -2   3   9 324.557 26.9060   2
  -2   3   9 308.947 27.8172   1
   2   3  -9 317.730 27.2183   1
  -1  -3   9 1311.11 88.8921   4
   1  -3  -9 1403.52 88.0314   4
  -1  -3   9 1358.24 89.4381   2
   1  -3  -9 1354.09 89.0961   3
   1  -3  -9 1375.50 90.7459   1
  -1  -3   9 1382.64 90.1307   1
   1   3  -9 1099.13 88.1008   5
  -1   3   9 1272.12 89.1083   2
   1   3  -9 1361.31 89.3591   2
   1   3  -9 1300.02 86.0928   3
   1   3  -9 1279.67 90.0143   1
   0  -3  -9 521.829 35.2089   3
   0  -3   9 500.104 33.9572   2
   0  -3   9 524.372 35.3223   4
   0  -3  -9 475.477 36.3322   1
   0   3   9 454.807 31.1309   5
   0   3  -9 450.543 34.1103   5
   0   3  -9 462.859 33.7170   2
   0   3   9 478.181 35.7137   2
   0   3  -9 439.104 36.2063   1
  -1  -3  -9 868.999 58.8510   1
   1  -3   9 815.110 54.5911   2
  -1  -3  -9 808.363 58.2747   3
   1  -3   9 836.818 57.7613   4
  -1   3  -9 795.326 59.4448   1
  -1   3  -9 886.739 57.1524   5
  -2  -3  -9 248.991 20.9009   1
  -2  -3  -9 254.775 17.7019   5
  -2  -3  -9 278.978 22.3077   3
  -2   3  -9 229.566 20.9632   5
  -2   3  -9 254.197 22.9474   1
  -3  -3  -9 267.853 21.8377   5
  -3  -3  -9 243.760 25.0618   3
  -3  -3  -9 274.907 21.7019   1
  -3   3  -9 296.856 25.2962   1
  -3   3  -9 334.140 25.6629   5
  -4  -3  -9 35.1919 11.6158   3
  -4  -3  -9 12.8631 12.8293   5
  -4   3  -9 33.8463 9.45484   1
  -4   3  -9 20.2199 11.4841   5
  -5  -3  -9 49.7881 13.8195   3
  -5  -3  -9 44.6436 13.4871   4
  -5   3  -9 43.1434 16.7022   5
  -5  -4   9 38.5663 15.4396   2
  -5  -4   9 60.0783 13.8898   4
  -5   4   9 30.5666 12.3479   1
  -5   4   9 32.5008 13.9392   2
  -5   4   9 56.0176 17.3310   5
  -4  -4   9 31.4269 13.2349   2
  -4  -4   9 26.8592 10.4815   4
  -4   4   9 0.93323 9.79931   1
  -4   4   9 29.6768 12.5294   2
  -4   4   9 20.8741 12.9373   5
   3  -4  -9 199.609 20.8968   1
  -3  -4   9 155.541 20.5899   1
  -3  -4   9 183.819 22.2743   2
   3  -4  -9 152.461 20.1031   3
  -3  -4   9 167.990 19.1512   4
  -3   4   9 148.676 19.7200   2
   3   4  -9 170.145 18.6214   1
  -3   4   9 172.854 21.3665   5
  -2  -4   9 545.818 43.3294   2
   2  -4  -9 579.155 42.5448   3
  -2  -4   9 566.373 41.9412   4
   2  -4  -9 569.612 43.8674   1
  -2  -4   9 590.825 42.4140   1
   2  -4  -9 560.988 38.9884   4
  -2   4   9 512.681 42.0345   2
  -2   4   9 532.042 41.5012   5
   2   4  -9 578.304 42.7124   1
   1  -4  -9 296.074 25.9202   1
   1  -4  -9 280.501 22.1300   4
  -1  -4   9 261.939 23.7535   4
  -1  -4   9 271.241 24.4715   1
  -1  -4   9 285.180 24.1054   2
   1  -4  -9 315.716 24.8830   3
   1   4  -9 258.484 23.6994   5
  -1   4   9 260.415 23.8399   2
  -1   4   9 286.912 21.9414   5
   1   4  -9 292.976 25.4322   1
   1   4  -9 303.638 20.3347   3
   0  -4  -9 669.179 49.5077   1
   0  -4   9 708.531 46.9483   2
   0  -4  -9 681.502 48.1875   3
   0  -4   9 666.914 47.7570   4
   0   4  -9 658.732 49.7487   1
   0   4  -9 642.583 47.5493   5
   1  -4   9 465.751 33.7812   4
  -1  -4  -9 444.073 34.2949   3
   1  -4   9 436.586 29.9256   2
  -1  -4  -9 446.967 34.8779   1
  -1   4  -9 452.221 33.0909   5
  -1   4  -9 479.920 36.2145   1
  -2  -4  -9 753.474 51.3776   1
  -2  -4  -9 741.354 52.2535   3
  -2   4  -9 700.757 50.9526   5
  -2   4  -9 698.627 52.6547   1
  -2   4  -9 704.529 53.1331   1
  -3  -4  -9 66.8232 11.9552   5
  -3  -4  -9 83.1912 10.4286   1
  -3  -4  -9 69.7019 13.3976   3
  -3   4  -9 89.0403 14.9509   5
  -3   4  -9 92.8316 14.0499   1
  -4  -4  -9 160.818 22.9750   4
  -4  -4  -9 173.300 20.8192   3
  -4   4  -9 174.563 22.4771   5
  -4   4  -9 184.649 20.2236   1
  -5  -5   9 25.5372 12.1387   4
  -5   5   9 4.38525 13.7803   2
  -5   5   9 -2.9155 14.6483   5
  -5   5   9 11.7082 15.2346   1
  -4  -5   9 116.711 20.8106   2
  -4  -5   9 149.429 19.1154   4
  -4   5   9 109.551 18.0450   1
  -4   5   9 90.1341 19.3775   5
  -4   5   9 92.3638 16.6987   2
  -3  -5   9 204.683 22.8056   2
  -3  -5   9 169.880 20.4466   4
   3  -5  -9 200.373 21.9299   3
   3  -5  -9 214.982 23.1248   1
  -3   5   9 193.521 22.4557   5
  -3   5   9 176.330 22.7350   1
  -3   5   9 140.960 21.1490   2
  -2  -5   9 216.305 22.2682   2
   2  -5  -9 220.199 17.6900   4
   2  -5  -9 254.001 24.5115   1
  -2  -5   9 218.332 21.8038   1
  -2  -5   9 198.564 21.4632   4
   2  -5  -9 230.408 22.3037   3
   2   5  -9 224.884 22.0265   1
  -2   5   9 193.659 20.5081   5
  -1  -5   9 355.472 27.0594   2
   1  -5  -9 334.054 28.4721   1
  -1  -5   9 325.101 26.2955   4
   1  -5  -9 373.826 27.6513   3
   1   5  -9 231.555 25.3286   5
  -1   5   9 280.494 22.6635   5
   1   5  -9 312.160 22.0324   3
   1   5  -9 334.512 28.3065   1
  -1   5   9 274.057 26.1345   2
   0  -5   9 22.5838 6.78529   2
   0  -5  -9 18.6870 7.80022   3
   0  -5  -9 22.5410 8.66894   1
   0  -5   9 24.8532 8.11258   4
   0   5  -9 20.0237 8.20705   5
   0   5  -9 18.2476 9.07461   1
   1  -5   9 402.919 26.5599   2
   1  -5   9 414.060 30.2459   4
  -1  -5  -9 376.894 31.6061   1
  -1  -5  -9 442.036 31.7252   3
  -1   5  -9 368.110 32.7918   1
   1   5   9 351.872 30.5901   1
  -1   5  -9 332.111 29.9339   5
   2  -5   9 222.197 20.7033   4
  -2  -5  -9 223.576 21.8084   1
  -2  -5  -9 250.869 22.6601   3
  -2   5  -9 247.506 22.8534   5
  -2   5  -9 238.137 23.6511   1
  -2   5  -9 262.079 24.7669   1
  -3  -5  -9 88.2040 11.5607   1
  -3  -5  -9 62.4399 12.2974   3
  -3   5  -9 85.9777 14.4276   1
  -3   5  -9 73.6526 14.2830   5
  -4  -5  -9 -1.1737 8.95691   3
  -4  -5  -9 -1.6286 10.8061   4
  -4   5  -9 -3.0730 8.46433   1
  -4   5  -9 3.15813 12.2795   5
  -4  -6   9 32.3508 12.8041   4
  -4  -6   9 14.0236 13.0806   2
  -4   6   9 8.26616 10.5764   1
  -4   6   9 18.3086 13.7738   2
  -4   6   9 34.5710 14.9591   5
   3  -6  -9 96.2279 16.4975   1
  -3  -6   9 88.4730 15.4170   4
  -3  -6   9 93.6198 17.9251   2
  -3   6   9 28.2660 13.2653   2
  -3   6   9 77.8760 16.7245   1
  -3   6   9 60.0706 14.6645   5
   2  -6  -9 128.225 19.0692   3
  -2  -6   9 122.985 18.7048   2
  -2  -6   9 174.655 18.5375   4
   2  -6  -9 115.572 19.4353   1
  -2   6   9 130.149 20.1986   1
  -2   6   9 110.051 15.2976   5
  -2   6   9 104.492 18.2221   2
   2   6  -9 121.097 17.3307   1
  -1  -6   9 94.6452 14.6535   4
   1  -6  -9 118.820 18.1114   1
  -1  -6   9 100.977 15.8322   2
   1  -6  -9 124.453 17.1304   3
   1   6  -9 107.459 17.1446   1
   1   6  -9 90.8814 9.42254   3
   1   6  -9 100.099 14.7050   5
  -1   6   9 93.0686 10.5968   5
  -1   6   9 132.924 18.6490   1
   0  -6  -9 64.8077 12.5200   3
   0  -6  -9 71.1396 13.5825   1
   0  -6   9 42.6319 10.1529   4
   0  -6   9 45.3894 9.39603   2
   0   6  -9 41.7718 12.2131   1
   0   6   9 41.6754 11.2702   1
   0   6  -9 54.6128 11.2658   5
  -1  -6  -9 185.772 20.0738   1
   1  -6   9 157.883 16.3192   4
   1  -6   9 141.070 13.0271   2
  -1  -6  -9 154.468 18.1686   3
  -1   6  -9 176.088 20.8967   1
   1   6   9 172.044 18.3623   1
  -1   6  -9 130.256 16.8092   5
  -2  -6  -9 89.6276 13.5782   1
  -2  -6  -9 75.6651 13.0549   3
   2  -6   9 69.9478 11.3643   4
  -2   6  -9 50.7935 12.9235   1
  -2   6  -9 63.4035 13.7856   5
  -3  -6  -9 23.7285 10.6483   3
  -3  -6  -9 33.9097 8.47318   1
  -3  -6  -9 22.7240 12.4518   4
  -3   6  -9 29.4141 10.9530   1
  -3   6  -9 16.7381 11.7488   5
  -4  -6  -9 24.2866 10.9999   3
  -4  -6  -9 11.8537 12.8851   4
  -4   6  -9 21.3643 22.7897   5
  -4   6  -9 22.4759 11.2579   1
  -4  -7   9 17.2087 11.8349   4
  -4  -7   9 22.8040 13.9544   2
  -4   7   9 30.4787 15.1293   5
  -4   7   9 18.6296 14.1756   2
  -4   7   9 21.2558 12.9330   1
  -3  -7   9 37.3543 15.4183   2
   3  -7  -9 30.6976 12.9526   1
  -3  -7   9 32.6305 12.0636   4
  -3   7   9 17.3301 11.6402   5
  -3   7   9 65.3849 16.3754   1
  -3   7   9 24.8557 13.3812   2
   2  -7  -9 43.1705 14.5269   3
  -2  -7   9 95.8021 16.5257   2
   2  -7  -9 89.2504 17.5943   1
  -2  -7   9 58.1102 12.7388   4
   2  -7  -9 79.0580 12.2243   4
   2   7  -9 73.6774 14.6888   1
  -2   7   9 75.2043 16.0021   1
  -2   7   9 59.5912 11.1040   5
  -1  -7   9 135.280 17.9984   2
   1  -7  -9 125.327 19.6911   3
  -1  -7   9 126.706 17.2840   4
   1  -7  -9 138.119 20.9265   1
  -1   7   9 135.676 20.8400   1
  -1   7   9 137.148 12.8472   5
   1   7  -9 109.198 17.9929   5
   1   7  -9 163.693 20.5412   1
   0  -7  -9 14.7325 10.3223   3
   0  -7   9 6.46225 8.57118   4
   0  -7  -9 18.9441 10.3671   1
   0  -7   9 12.3932 7.84971   2
   0   7  -9 18.2211 10.6639   1
   0   7   9 13.2068 10.6190   1
   0   7  -9 6.32276 9.61810   5
   1  -7   9 80.9944 14.0000   4
  -1  -7  -9 126.703 18.6931   1
  -1  -7  -9 139.679 17.9595   3
  -1   7  -9 147.329 17.1831   5
  -1   7  -9 132.746 20.3060   1
  -2  -7  -9 35.8108 10.9104   3
  -2  -7  -9 42.2413 11.3044   1
  -2  -7  -9 53.8160 14.0291   4
   2  -7   9 36.6973 9.59795   4
  -2   7  -9 50.5270 14.0795   5
  -2   7  -9 49.4831 13.8620   1
  -3  -7  -9 0.35257 11.0704   4
  -3  -7  -9 22.6589 11.2368   3
  -3  -7  -9 9.91196 7.61293   1
  -3   7  -9 13.4813 11.6551   1
  -3   7  -9 9.80339 14.3492   5
  -3  -8   9 31.3196 12.8041   4
  -3  -8   9 27.2875 15.0213   2
   3  -8  -9 51.9345 15.1673   1
  -3   8   9 21.5984 12.0513   5
  -3   8   9 19.4635 15.1055   1
  -2  -8   9 19.5907 10.9777   4
  -2  -8   9 13.1689 12.2809   2
   2  -8  -9 38.2731 15.3662   3
   2  -8  -9 39.6981 14.3022   1
  -2   8   9 4.86918 12.6965   1
   1  -8  -9 37.8878 13.1524   3
  -1  -8   9 36.6158 12.3698   2
   1  -8  -9 45.4187 10.9314   4
  -1  -8   9 31.0510 10.8058   4
   1  -8  -9 54.5768 15.0788   1
   1   8  -9 66.0350 13.5481   5
   1   8  -9 34.4823 12.5933   1
  -1   8   9 48.8151 14.9343   1
   0  -8   9 204.593 22.8916   4
   0  -8  -9 226.780 23.1103   4
   0  -8   9 233.684 22.1044   2
   0  -8  -9 215.182 26.4972   1
   0  -8  -9 242.566 25.3415   3
   0   8  -9 246.744 27.5623   1
   0   8  -9 194.742 22.5651   5
   0   8   9 220.898 26.4280   1
  -1  -8  -9 78.4848 16.1614   1
  -1  -8  -9 86.7331 15.7772   4
   1  -8   9 66.7464 13.0159   4
  -1  -8  -9 66.5240 14.6376   3
  -1   8  -9 93.3909 16.3265   5
  -1   8  -9 109.240 20.0253   1
  -2  -8  -9 18.6082 11.0079   3
  -2  -8  -9 46.8833 14.1992   4
  -2  -8  -9 28.9190 11.1161   1
  -2   8  -9 32.2101 14.5689   1
  -2   8  -9 6.86654 13.7111   5
  -3  -8  -9 16.5916 11.2704   3
  -3  -8  -9 9.07048 8.44872   1
   2  -9  -9 39.0996 14.7424   1
  -2  -9   9 43.4951 13.1706   4
  -2  -9   9 42.3969 15.0128   2
   2  -9  -9 37.7300 15.1868   3
  -2   9   9 53.0727 16.9233   1
   1  -9  -9 23.7913 14.2113   3
  -1  -9   9 45.6676 13.1657   2
   1  -9  -9 25.0176 13.5272   1
  -1  -9   9 8.50227 10.4819   4
  -1   9   9 18.6774 14.2293   1
   1   9  -9 44.2708 14.6183   1
   1   9  -9 17.4826 12.4942   5
   0  -9   9 -1.3951 9.86825   4
   0  -9  -9 2.07154 9.07365   4
   0  -9  -9 6.31534 11.9767   3
   0  -9  -9 -3.2652 11.0023   1
   0   9  -9 -4.4675 10.6743   5
   0   9  -9 12.2455 12.7182   1
  -1  -9  -9 39.8175 14.0154   4
  -1  -9  -9 62.9364 15.4206   1
  -1  -9  -9 34.0074 13.9013   3
  -1   9  -9 45.9968 15.8109   5
  -1   9  -9 31.6943 15.6818   1
  -2  -9  -9 38.8001 13.3522   3
  -2  -9  -9 37.8110 14.3994   1
  -2  -9  -9 25.2763 12.6640   4
  -2   9  -9 11.2172 16.7542   5
  -2   9  -9 54.0924 16.9761   1
   0 -10  -9 49.2863 13.9632   4
   0 -10   9 51.1965 13.9777   4
   0 -10  -9 26.4442 14.3091   3
   0  10  -9 40.7788 16.7509   1
  -5   0  10 19.3325 13.2854   2
  -5   0  10 10.0034 9.99497   4
  -4   0  10 160.356 16.5323   4
  -4   0  10 164.655 22.2755   2
  -3   0  10 44.5608 6.87232   3
  -3   0  10 26.7603 9.74247   2
   3   0 -10 46.8835 10.1348   1
  -3   0  10 28.6479 8.26646   1
  -3   0  10 42.1262 8.65094   4
  -2   0  10 408.224 29.5888   4
   2   0 -10 389.029 31.2560   1
   2   0 -10 378.953 28.2526   3
  -2   0  10 393.669 27.7713   3
  -2   0  10 383.216 31.0507   1
  -2   0  10 386.127 31.3122   2
  -1   0  10 141.503 14.5568   1
   1   0 -10 120.279 11.0495   3
  -1   0  10 108.103 12.8629   4
  -1   0  10 119.090 11.2119   5
  -1   0  10 118.511 10.9387   3
   1   0 -10 122.014 13.8924   1
   1   0 -10 107.214 11.7437   4
   1   0 -10 115.253 12.8939   2
  -1   0  10 114.435 12.7336   2
   0   0  10 581.048 40.9342   2
   0   0 -10 545.890 42.2922   1
   0   0 -10 532.278 39.9601   5
   0   0  10 640.027 39.5704   5
   0   0 -10 593.767 41.0112   3
   0   0  10 553.819 42.1637   1
   0   0 -10 601.042 41.1276   2
   0   0  10 600.244 41.2320   3
  -1   0 -10 429.576 29.3633   5
  -1   0 -10 444.666 30.2609   2
  -1   0 -10 425.351 31.8098   3
   1   0  10 399.505 30.0146   5
  -1   0 -10 402.859 31.8152   1
  -2   0 -10 320.651 25.0722   1
   2   0  10 267.249 24.5841   5
  -2   0 -10 338.053 23.7155   5
  -2   0 -10 286.523 25.6900   3
  -2   0 -10 343.369 23.7719   2
  -3   0 -10 531.766 39.5054   1
  -3   0 -10 534.104 40.0449   5
  -3   0 -10 556.224 43.0539   3
  -3   0 -10 575.505 39.2414   2
  -4   0 -10 20.9845 10.2973   5
  -4   0 -10 34.5404 6.40106   1
  -4   0 -10 38.5443 12.7693   3
  -5   0 -10 34.5844 13.2552   5
  -5   0 -10 44.4201 14.3760   3
  -5  -1  10 71.6336 18.6126   2
  -5  -1  10 83.0369 13.4907   4
  -5   1  10 99.9517 19.0070   2
  -4  -1  10 65.8777 11.4871   4
  -4  -1  10 69.1858 15.0988   2
  -4   1  10 61.7870 9.61243   4
  -4   1  10 52.7281 13.9372   2
  -3  -1  10 260.037 21.8289   4
  -3  -1  10 232.573 24.1779   2
  -3  -1  10 244.369 22.8218   1
   3  -1 -10 258.109 23.6690   1
  -3  -1  10 250.038 18.5280   3
   3   1 -10 260.660 23.0636   1
  -3   1  10 235.796 24.4228   2
  -3   1  10 262.609 20.9197   4
  -2  -1  10 186.355 18.3025   2
   2  -1 -10 166.532 15.7641   3
  -2  -1  10 145.664 16.1031   4
  -2  -1  10 175.323 13.5597   3
  -2  -1  10 169.386 17.6301   1
   2  -1 -10 167.971 15.4458   4
   2  -1 -10 188.905 18.3479   1
  -2   1  10 168.484 16.1670   4
   2   1 -10 184.162 18.0325   1
  -2   1  10 188.794 18.2082   1
   2   1 -10 179.798 13.9609   3
  -2   1  10 141.078 16.9054   2
  -2   1  10 196.891 15.0684   3
  -1  -1  10 974.607 72.4889   2
  -1  -1  10 1010.80 72.3581   4
   1  -1 -10 989.802 71.5307   3
   1  -1 -10 935.302 73.3292   1
  -1  -1  10 978.980 71.2498   5
   1  -1 -10 999.725 71.7226   4
  -1  -1  10 1013.64 73.3420   1
  -1  -1  10 976.917 70.7565   3
   1   1 -10 1145.64 70.8353   3
  -1   1  10 1195.99 74.3092   1
  -1   1  10 1061.11 71.0649   5
  -1   1  10 1205.39 71.9168   3
   1   1 -10 1161.24 74.1323   1
  -1   1  10 1126.90 72.3760   4
   1   1 -10 1128.22 73.0898   2
  -1   1  10 1154.39 73.2062   2
   0  -1  10 21.2787 7.40684   4
   0  -1  10 31.2092 7.72989   1
   0  -1  10 31.2475 6.36809   2
   0  -1 -10 30.4436 7.33212   1
   0  -1  10 34.0176 5.57837   5
   0  -1 -10 26.5420 6.17848   3
   0  -1 -10 35.5575 6.72039   2
   0   1 -10 22.5441 6.10720   5
   0   1 -10 20.4775 5.93259   3
   0   1 -10 32.9270 6.15061   2
   0   1  10 28.3855 4.61201   5
   0   1 -10 29.1242 7.76519   1
   0   1  10 20.8277 6.63627   2
   0   1  10 28.7864 6.86981   3
   1  -1  10 1295.05 96.3892   5
  -1  -1 -10 1383.83 97.5401   3
  -1  -1 -10 1516.02 95.1590   5
  -1  -1 -10 1575.63 97.0644   2
  -1  -1 -10 1404.83 97.8597   1
  -1   1 -10 1332.78 97.4098   3
  -1   1 -10 1496.64 95.8850   2
  -1   1 -10 1494.69 98.4466   1
   1   1  10 1409.17 95.7800   5
  -1   1 -10 1581.96 96.0660   5
  -2  -1 -10 348.432 28.7591   3
  -2  -1 -10 357.237 26.9437   2
  -2  -1 -10 378.842 27.6172   1
  -2  -1 -10 362.296 25.3659   5
  -2   1 -10 334.667 28.5105   3
  -2   1 -10 361.235 26.5076   5
   2   1  10 293.473 26.4275   5
  -2   1 -10 382.913 25.1098   2
  -2   1 -10 344.566 27.9491   1
  -3  -1 -10 448.256 38.0252   3
  -3  -1 -10 432.192 34.8851   1
  -3  -1 -10 480.779 35.7895   5
  -3   1 -10 518.555 39.5902   3
  -3   1 -10 524.382 36.6925   1
  -3   1 -10 545.766 37.3333   5
  -3   1 -10 487.994 34.6843   2
  -4  -1 -10 37.5850 10.1967   5
  -4  -1 -10 41.9850 12.2585   3
  -4  -1 -10 53.6515 11.1674   2
  -4  -1 -10 51.8976 6.09348   1
  -4   1 -10 19.5264 10.9607   3
  -4   1 -10 38.5549 8.08697   1
  -4   1 -10 32.7433 11.5182   5
  -5  -1 -10 33.0267 12.1020   4
  -5  -1 -10 22.5578 11.8685   3
  -5  -1 -10 40.7670 17.0118   5
  -5   1 -10 29.2963 13.9604   5
  -5   1 -10 21.3021 14.1556   3
  -5  -2  10 22.4685 14.0940   2
  -5  -2  10 36.3300 10.5324   4
  -5   2  10 31.9494 14.3888   5
  -5   2  10 30.5832 14.2757   2
  -4  -2  10 532.265 43.1465   2
  -4  -2  10 554.669 39.1483   4
  -4   2  10 478.073 35.7368   4
  -4   2  10 444.523 40.7318   2
  -3  -2  10 149.737 10.4582   3
  -3  -2  10 138.479 16.2582   1
   3  -2 -10 137.309 16.2406   3
   3  -2 -10 130.029 17.2988   1
  -3  -2  10 153.285 19.7534   2
   3  -2 -10 126.277 13.1779   4
  -3  -2  10 146.919 16.2295   4
  -3   2  10 133.570 13.9610   4
  -3   2  10 119.424 17.9436   2
   3   2 -10 147.032 16.6015   1
  -3   2  10 134.793 17.4936   1
   2  -2 -10 685.543 52.6078   3
  -2  -2  10 723.543 52.9941   4
   2  -2 -10 746.585 51.6417   4
  -2  -2  10 751.810 54.2342   1
   2  -2 -10 727.271 54.9569   1
  -2  -2  10 738.658 54.7300   2
   2   2 -10 787.346 49.7619   3
   2   2 -10 754.275 54.2731   1
  -2   2  10 745.065 54.1792   2
  -2   2  10 842.621 55.5315   1
  -1  -2  10 302.481 23.6021   4
  -1  -2  10 276.055 23.9211   2
   1  -2 -10 285.010 23.1828   3
  -1  -2  10 289.679 24.6306   1
   1  -2 -10 279.689 22.4463   4
   1  -2 -10 274.989 24.9754   1
   1   2 -10 286.961 20.8028   3
  -1   2  10 352.085 28.1305   1
   1   2 -10 304.339 23.8554   2
  -1   2  10 285.625 24.3671   2
   1   2 -10 287.654 24.9074   1
   0  -2 -10 1447.18 104.646   3
   0  -2  10 1578.38 103.995   2
   0  -2 -10 1531.08 106.067   1
   0  -2  10 1542.55 105.070   4
   0   2  10 1801.45 102.255   5
   0   2 -10 1584.79 106.531   1
   0   2  10 1511.98 105.043   2
   0   2 -10 1474.19 104.160   5
   0   2 -10 1561.41 104.217   2
   0   2 -10 1605.30 104.224   3
  -1  -2 -10 607.772 39.5206   1
  -1  -2 -10 581.839 39.0621   3
  -1  -2 -10 579.352 35.3806   5
   1  -2  10 586.951 35.7251   2
   1  -2  10 596.236 38.9679   4
  -1   2 -10 483.390 38.3702   3
  -1   2 -10 488.355 37.0334   5
  -1   2 -10 483.968 35.8140   2
   1   2  10 432.289 35.5657   5
  -1   2 -10 487.782 39.2185   1
  -2  -2 -10 270.802 23.9134   3
  -2  -2 -10 252.728 22.7173   1
  -2  -2 -10 275.450 20.1816   5
  -2   2 -10 330.381 23.3352   5
  -2   2 -10 267.818 25.1545   3
  -2   2 -10 289.304 24.3397   1
  -3  -2 -10 173.024 16.3862   1
  -3  -2 -10 180.671 16.5091   5
  -3  -2 -10 179.986 20.6841   3
  -3   2 -10 222.227 20.3970   5
  -3   2 -10 213.373 21.5853   3
  -3   2 -10 199.955 19.0599   1
  -4  -2 -10 78.4784 13.2118   5
  -4  -2 -10 59.2289 14.1114   3
  -4   2 -10 124.068 19.1248   3
  -4   2 -10 78.0248 11.9495   1
  -4   2 -10 58.0813 14.5759   5
  -5  -3  10 69.3063 13.8790   4
  -5  -3  10 47.4839 17.3727   2
  -5   3  10 58.6879 18.6509   5
  -5   3  10 69.4470 17.2082   2
  -4  -3  10 20.5974 12.2061   2
  -4  -3  10 16.5397 9.51928   4
  -4   3  10 28.6918 12.3886   2
  -4   3  10 20.1190 14.3371   5
   3  -3 -10 572.731 36.6455   4
  -3  -3  10 522.502 39.8005   1
  -3  -3  10 521.375 39.5754   4
   3  -3 -10 535.971 41.3826   1
   3  -3 -10 509.099 40.1506   3
  -3  -3  10 572.047 43.0620   2
   3   3 -10 467.071 39.5381   1
  -3   3  10 433.590 39.4467   2
  -3   3  10 489.394 40.9786   1
  -2  -3  10 483.372 36.4548   1
   2  -3 -10 462.917 37.5040   1
   2  -3 -10 457.867 33.4082   4
  -2  -3  10 488.586 35.9992   4
  -2  -3  10 453.546 37.1461   2
   2  -3 -10 452.287 35.7845   3
  -2   3  10 455.692 36.0977   2
   2   3 -10 486.206 36.8140   1
   1  -3 -10 721.986 50.5645   1
   1  -3 -10 699.082 48.0929   4
  -1  -3  10 722.126 49.8204   1
  -1  -3  10 723.973 49.0516   2
   1  -3 -10 675.343 48.4327   3
  -1  -3  10 647.564 48.2171   4
   1   3 -10 686.963 45.4360   3
   1   3 -10 568.267 47.7332   5
   1   3 -10 712.452 50.1486   1
  -1   3  10 652.138 48.8451   2
   1   3 -10 671.734 48.5478   2
   0  -3  10 165.849 14.1647   2
   0  -3 -10 180.171 16.1542   3
   0  -3  10 162.993 15.3822   4
   0  -3 -10 178.959 17.5969   1
   0   3 -10 142.829 13.5942   2
   0   3  10 146.787 15.8614   2
   0   3 -10 137.106 13.8938   3
   0   3 -10 128.035 14.5317   5
   0   3 -10 139.737 16.6490   1
   0   3  10 164.575 10.9752   5
   1  -3  10 644.096 45.6122   4
  -1  -3 -10 644.292 46.1256   3
  -1  -3 -10 669.787 46.7562   1
   1  -3  10 657.613 42.1517   2
  -1   3 -10 597.121 44.3644   5
  -1   3 -10 600.494 47.1519   1
  -2  -3 -10 171.965 18.4822   3
  -2  -3 -10 207.252 14.3255   5
  -2  -3 -10 185.143 18.0726   1
  -2   3 -10 201.945 18.9672   5
  -2   3 -10 213.227 20.6119   1
  -3  -3 -10 241.370 20.2706   1
  -3  -3 -10 278.835 24.6820   3
  -3  -3 -10 256.665 19.6165   5
  -3   3 -10 259.363 23.8094   1
  -3   3 -10 233.234 23.0063   5
  -4  -3 -10 119.326 18.6091   3
  -4   3 -10 106.808 15.6369   1
  -4   3 -10 133.272 18.7209   5
  -5  -4  10 35.7245 12.5306   4
  -5  -4  10 54.8032 17.5000   2
  -5   4  10 24.6258 12.3565   1
  -5   4  10 32.9923 17.0824   5
  -5   4  10 44.4920 15.1453   2
  -4  -4  10 216.419 22.1111   4
  -4  -4  10 206.392 24.2077   2
  -4   4  10 139.378 21.9101   2
  -4   4  10 158.022 25.1306   5
   3  -4 -10 105.579 17.3197   1
  -3  -4  10 109.806 16.4350   4
  -3  -4  10 113.966 19.0922   2
   3  -4 -10 114.372 17.7285   3
   3   4 -10 119.126 15.9373   1
  -3   4  10 103.721 18.0433   5
  -3   4  10 110.871 16.3841   2
   2  -4 -10 178.264 20.3333   1
  -2  -4  10 160.280 19.4307   2
  -2  -4  10 173.762 18.6820   1
   2  -4 -10 158.512 18.0222   3
   2  -4 -10 167.768 14.8008   4
  -2  -4  10 166.202 18.1188   4
  -2   4  10 156.474 19.3562   2
   2   4 -10 183.747 19.1994   1
  -2   4  10 153.801 18.4203   5
  -1  -4  10 400.320 31.1897   2
  -1  -4  10 359.015 30.5145   4
   1  -4 -10 414.530 31.4116   3
   1  -4 -10 424.815 33.4842   1
   1   4 -10 425.150 32.9857   1
  -1   4  10 388.399 29.0337   5
   1   4 -10 425.614 27.6204   3
   1   4 -10 345.194 30.3815   5
  -1   4  10 384.391 31.4690   2
   0  -4  10 239.719 20.3073   2
   0  -4 -10 256.251 22.4380   3
   0  -4 -10 242.135 23.3615   1
   0  -4  10 237.674 21.9768   4
   0   4 -10 287.287 24.6327   1
   0   4 -10 265.887 21.6738   5
   1  -4  10 368.223 28.2363   4
  -1  -4 -10 344.756 28.2649   3
  -1  -4 -10 364.782 29.2990   1
   1  -4  10 329.102 23.8148   2
  -1   4 -10 366.830 27.5715   5
  -1   4 -10 408.906 31.1472   1
  -2  -4 -10 25.9250 7.67299   1
  -2  -4 -10 26.5336 9.83124   3
  -2   4 -10 52.1137 11.3650   1
  -2   4 -10 47.6276 10.8648   5
  -2   4 -10 66.3023 12.3892   1
   2   4  10 39.6568 7.82037   1
  -3  -4 -10 116.887 12.9284   1
  -3  -4 -10 89.9510 14.9469   3
  -3   4 -10 100.142 16.8333   1
  -3   4 -10 143.400 18.4776   5
  -4  -4 -10 26.3469 11.4053   3
  -4   4 -10 28.7823 10.5351   1
  -4   4 -10 49.6713 15.4051   5
  -5  -5  10 38.6629 13.5991   4
  -5   5  10 72.7739 17.0947   2
  -5   5  10 51.3778 19.2326   5
  -4  -5  10 36.4402 12.2589   4
  -4  -5  10 27.1790 12.9670   2
  -4   5  10 17.8868 12.2649   1
  -4   5  10 19.9899 12.7788   2
  -4   5  10 26.8481 14.8729   5
  -3  -5  10 110.959 19.4517   2
  -3  -5  10 113.934 17.2511   4
   3  -5 -10 116.307 17.6028   3
   3  -5 -10 110.970 18.5955   1
  -3   5  10 93.6650 17.4451   5
  -3   5  10 75.9380 16.2810   2
  -2  -5  10 286.621 26.4570   1
   2  -5 -10 274.598 26.5544   3
   2  -5 -10 281.909 22.4232   4
   2  -5 -10 299.338 28.4934   1
  -2  -5  10 294.623 25.5488   4
  -2  -5  10 267.924 26.4428   2
   2   5 -10 334.585 27.5640   1
  -2   5  10 283.521 25.1274   5
  -1  -5  10 323.413 29.1352   2
   1  -5 -10 330.648 30.8030   1
  -1  -5  10 318.908 28.8783   4
   1  -5 -10 340.751 29.1820   3
   1   5 -10 348.248 28.8414   5
  -1   5  10 326.505 25.5352   5
   1   5 -10 399.811 25.2303   3
   1   5 -10 376.640 25.0434   3
   1   5 -10 353.275 30.9728   1
  -1   5  10 327.326 30.0687   2
   0  -5 -10 221.181 22.3379   1
   0  -5  10 228.903 19.0832   2
   0  -5 -10 242.744 21.7522   3
   0  -5  10 209.584 20.0649   4
   0   5 -10 202.011 20.0324   5
   0   5 -10 201.257 22.5523   1
  -1  -5 -10 396.159 29.9301   3
  -1  -5 -10 372.970 30.5159   1
   1  -5  10 344.501 24.5539   2
   1  -5  10 379.309 29.0704   4
  -1   5 -10 339.380 28.9454   5
   1   5  10 337.652 29.4274   1
  -1   5 -10 378.195 32.0545   1
  -2  -5 -10 32.4501 9.37373   1
  -2  -5 -10 52.2827 11.4898   3
  -2   5 -10 43.2263 11.0911   5
  -2   5 -10 58.9178 12.1232   1
  -3  -5 -10 136.696 15.4085   1
  -3  -5 -10 157.051 19.1000   3
  -3   5 -10 135.754 19.6806   1
  -3   5 -10 141.991 20.5183   5
  -4  -5 -10 53.3081 13.0827   3
  -4  -5 -10 69.6589 16.1591   4
  -4   5 -10 63.9881 14.2005   1
  -4   5 -10 51.0439 16.9007   5
  -4  -6  10 80.0195 16.2294   4
  -4  -6  10 92.7960 20.0448   2
  -4   6  10 79.5161 16.9191   1
  -4   6  10 70.7318 17.4675   2
  -4   6  10 125.677 21.6256   5
   3  -6 -10 180.565 22.2249   3
  -3  -6  10 181.665 24.3280   2
  -3  -6  10 147.561 21.0019   4
   3  -6 -10 156.582 22.9452   1
  -3   6  10 164.639 23.4787   1
  -3   6  10 155.388 20.8283   5
  -2  -6  10 246.317 25.2991   4
  -2  -6  10 248.676 26.5305   2
   2  -6 -10 303.296 28.8012   1
   2  -6 -10 303.298 27.9873   3
  -2   6  10 282.728 28.6865   1
  -2   6  10 266.121 23.2961   5
   2   6 -10 284.471 26.6286   1
  -2   6  10 209.174 24.6439   2
   1  -6 -10 273.970 24.1792   3
   1  -6 -10 207.182 25.0792   1
  -1  -6  10 235.626 23.0514   4
  -1  -6  10 226.936 22.9328   2
  -1   6  10 251.183 25.9817   1
   1   6 -10 229.778 23.6183   5
  -1   6  10 226.697 18.3892   5
   1   6 -10 262.194 25.8488   1
   0  -6  10 726.705 54.1724   4
   0  -6 -10 733.772 57.0000   1
   0  -6  10 756.145 53.3320   2
   0  -6 -10 736.689 55.1538   3
   0   6  10 797.367 56.9171   1
   0   6 -10 752.452 54.4386   5
   0   6 -10 766.982 57.4830   1
   1  -6  10 141.880 17.4743   4
  -1  -6 -10 126.954 18.8789   3
  -1  -6 -10 166.939 20.5085   1
  -1   6 -10 226.026 23.4740   1
   1   6  10 218.563 20.1918   1
  -1   6 -10 192.787 20.3175   5
  -2  -6 -10 44.2778 10.3177   1
  -2  -6 -10 67.4889 13.0685   3
   2  -6  10 27.5205 9.73138   4
  -2   6 -10 36.8439 12.7259   5
  -2   6 -10 22.7761 11.5044   1
  -3  -6 -10 57.3283 14.1793   4
  -3  -6 -10 40.9870 9.24147   1
  -3  -6 -10 47.5616 12.8616   3
  -3   6 -10 34.8582 12.8753   1
  -3   6 -10 55.3847 15.0508   5
  -4  -7  10 -5.5566 16.0801   4
  -4  -7  10 8.22960 14.6293   2
  -4   7  10 2.04881 13.6010   2
  -4   7  10 20.3260 13.8334   5
  -4   7  10 -2.2425 12.7788   1
  -3  -7  10 39.2226 13.2805   4
   3  -7 -10 65.6273 15.1542   1
  -3  -7  10 41.7388 15.1690   2
  -3   7  10 34.5440 15.0940   1
  -3   7  10 38.1130 12.8949   5
  -3   7  10 30.5700 14.6613   2
  -2  -7  10 44.4526 12.4790   4
   2  -7 -10 90.0130 15.8636   3
   2  -7 -10 48.2828 14.5567   1
  -2  -7  10 78.9829 16.0509   2
  -2   7  10 66.6708 15.8266   1
   2   7 -10 74.0793 14.5392   1
  -2   7  10 55.8758 10.8744   5
  -1  -7  10 148.720 19.1381   2
   1  -7 -10 155.645 20.9788   3
   1  -7 -10 131.460 21.1216   1
  -1  -7  10 135.298 18.3825   4
   1   7 -10 107.665 18.6093   5
   1   7 -10 132.255 20.2808   1
  -1   7  10 122.762 20.8954   1
   0  -7  10 154.931 17.4897   2
   0  -7 -10 187.987 20.4548   3
   0  -7 -10 164.035 22.1313   1
   0  -7  10 157.005 18.6648   4
   0   7  10 157.457 21.4391   1
   0   7 -10 159.547 22.3928   1
   0   7 -10 172.676 20.8727   5
   1  -7  10 115.980 16.2247   4
  -1  -7 -10 116.832 17.8317   3
  -1  -7 -10 134.143 19.1320   1
  -1   7 -10 106.725 18.4582   5
  -1   7 -10 123.470 19.8409   1
  -2  -7 -10 66.3489 13.7603   1
  -2  -7 -10 62.1999 13.3250   3
   2  -7  10 54.7170 11.4736   4
  -2  -7 -10 57.5325 14.3958   4
  -2   7 -10 58.9705 15.0561   5
  -2   7 -10 53.2189 14.5987   1
  -3  -7 -10 44.7444 10.2145   1
  -3  -7 -10 23.2248 11.7895   3
  -3  -7 -10 22.2904 12.2777   4
  -3   7 -10 10.3468 14.9073   5
  -3   7 -10 31.0963 12.7622   1
  -3  -8  10 21.0557 14.7623   2
   3  -8 -10 9.27415 12.9717   1
  -3  -8  10 39.1516 14.2900   4
  -3   8  10 9.24123 13.7599   1
   2  -8 -10 11.0791 13.4699   1
   2  -8 -10 21.4191 13.6896   3
  -2  -8  10 22.1856 11.4968   4
  -2  -8  10 27.0046 13.3688   2
  -2   8  10 41.7060 16.3302   1
   1  -8 -10 140.121 21.6881   1
   1  -8 -10 139.822 21.5476   3
   1  -8 -10 105.709 15.9882   4
  -1  -8  10 121.197 18.2947   4
  -1  -8  10 127.255 18.3579   2
   1   8 -10 121.203 19.6744   1
   1   8 -10 99.6603 18.2763   5
  -1   8  10 78.2071 18.0699   1
   0  -8 -10 115.312 16.7617   4
   0  -8 -10 135.321 19.9597   3
   0  -8  10 66.7217 14.2173   4
   0  -8 -10 132.410 21.2547   1
   0   8 -10 123.792 20.8552   1
   0   8  10 96.6319 18.3758   1
   0   8 -10 99.4922 17.2100   5
  -1  -8 -10 112.006 17.1429   3
   1  -8  10 92.2607 14.8322   4
  -1  -8 -10 116.355 18.3969   4
  -1  -8 -10 102.798 18.3537   1
  -1   8 -10 95.8325 17.2294   5
  -1   8 -10 93.6414 19.6362   1
  -2  -8 -10 69.8546 14.4337   1
  -2  -8 -10 62.3052 14.4124   3
  -2  -8 -10 36.4242 14.3025   4
  -2   8 -10 65.6092 16.6332   1
  -2   8 -10 26.0820 13.4919   5
  -2  -9  10 14.1728 11.5835   4
   2  -9 -10 9.51417 15.9838   3
   2  -9 -10 36.3984 15.5493   1
  -2  -9  10 5.39156 12.8437   2
  -2   9  10 6.14508 15.6957   1
   1  -9 -10 56.2138 15.8618   1
  -1  -9  10 37.3257 13.0052   2
   1  -9 -10 33.9327 14.8742   3
  -1  -9  10 45.8163 13.8405   4
   1   9 -10 31.6922 14.3426   1
   1   9 -10 31.3725 13.7066   5
  -1   9  10 28.3966 13.9466   1
   0  -9 -10 47.9241 13.0758   4
   0  -9 -10 51.6086 15.6925   3
   0  -9 -10 48.6999 16.1781   1
   0  -9  10 46.0570 12.8712   4
   0   9 -10 77.7790 17.9046   1
   0   9 -10 54.7402 14.1886   5
  -1  -9 -10 15.8228 12.2966   3
  -1  -9 -10 27.5867 12.9781   1
  -1  -9 -10 42.6714 13.3516   4
  -1   9 -10 23.3248 14.4034   5
  -1   9 -10 35.0833 15.5950   1
  -5   0  11 10.1905 13.6040   2
  -4   0  11 74.8913 15.6905   2
  -4   0  11 97.1694 13.4526   4
  -3   0  11 387.935 31.9447   1
  -3   0  11 360.019 32.8291   2
  -3   0  11 403.529 28.0395   3
  -3   0  11 368.309 29.9251   4
   3   0 -11 387.173 32.0408   1
  -2   0  11 209.154 16.6221   3
   2   0 -11 197.952 17.0054   3
  -2   0  11 203.249 18.7651   4
  -2   0  11 208.367 20.0941   2
  -2   0  11 224.382 20.6765   1
   2   0 -11 217.758 20.8869   1
  -1   0  11 499.067 35.3464   5
  -1   0  11 519.333 35.5225   3
   1   0 -11 486.291 37.9484   1
   1   0 -11 482.991 35.2636   3
  -1   0  11 519.356 37.3055   2
  -1   0  11 541.255 38.4365   1
  -1   0  11 459.757 36.3272   4
   0   0  11 417.475 29.9435   2
   0   0  11 431.527 28.2982   5
   0   0 -11 429.163 30.0476   2
   0   0  11 421.243 30.1244   3
   0   0 -11 393.122 29.7086   3
   0   0 -11 348.790 28.5865   5
   0   0 -11 371.543 31.3300   1
  -1   0 -11 781.336 52.5376   5
   1   0  11 729.616 53.1666   5
  -1   0 -11 753.201 54.8687   3
  -1   0 -11 792.973 55.5102   1
  -1   0 -11 843.104 53.6627   2
  -2   0 -11 267.151 20.7671   2
  -2   0 -11 264.228 22.8477   1
  -2   0 -11 272.074 20.7566   5
  -2   0 -11 258.386 23.4470   3
  -3   0 -11 37.7783 11.7107   3
  -3   0 -11 37.8119 8.16765   1
  -3   0 -11 26.8387 8.14419   5
  -4   0 -11 61.7521 14.7753   3
  -4   0 -11 78.8825 10.1113   1
  -4   0 -11 51.8822 12.3811   5
  -5  -1  11 32.2225 10.4275   4
  -5  -1  11 24.3799 14.7987   2
  -5   1  11 23.2685 12.7641   2
  -4  -1  11 83.1801 12.6386   4
  -4  -1  11 67.9365 14.7421   2
  -4   1  11 81.3685 12.0535   4
  -4   1  11 53.9610 13.9124   2
  -3  -1  11 37.6942 9.46632   1
  -3  -1  11 44.4249 6.72832   3
  -3  -1  11 43.6908 9.79571   4
  -3  -1  11 36.5793 12.1458   2
   3  -1 -11 43.1821 10.2413   1
   3  -1 -11 55.6095 10.3051   3
   3   1 -11 45.2947 9.69387   1
  -3   1  11 42.4689 11.9407   2
  -3   1  11 50.4834 9.04363   4
  -3   1  11 46.5446 10.9321   1
  -2  -1  11 1077.09 78.7170   2
   2  -1 -11 1086.51 76.7168   3
  -2  -1  11 1157.31 75.2304   3
  -2  -1  11 1093.61 77.5129   4
  -2  -1  11 1140.70 79.0723   1
   2  -1 -11 1096.78 79.2693   1
  -2   1  11 1163.33 78.9631   2
  -2   1  11 1177.91 77.1026   4
   2   1 -11 1131.81 75.3208   3
  -2   1  11 1160.45 79.5004   1
   2   1 -11 1128.80 79.1812   1
  -2   1  11 1179.04 76.4302   3
  -1  -1  11 757.504 51.2013   2
  -1  -1  11 695.915 50.7358   4
   1  -1 -11 689.022 49.7346   3
  -1  -1  11 728.732 51.9981   1
   1  -1 -11 679.725 52.0475   1
  -1  -1  11 779.975 49.2179   3
  -1   1  11 759.387 49.8561   3
   1   1 -11 712.404 48.7680   3
   1   1 -11 748.283 52.2581   1
  -1   1  11 707.509 49.0258   5
   1   1 -11 700.013 51.0730   2
  -1   1  11 646.486 50.5489   2
   0  -1 -11 1574.03 100.186   2
   0  -1  11 1422.82 100.310   4
   0  -1 -11 1405.71 101.033   1
   0  -1  11 1456.90 98.9073   2
   0  -1 -11 1442.77 99.6143   3
   0  -1  11 1554.66 98.2364   5
   0   1 -11 1371.48 98.7892   5
   0   1  11 1728.91 97.6531   5
   0   1 -11 1500.70 99.4384   2
   0   1 -11 1391.97 99.0212   3
   0   1 -11 1492.93 101.446   1
   0   1  11 1459.59 99.6641   2
  -1  -1 -11 426.595 34.3012   1
  -1  -1 -11 423.332 34.0166   3
  -1  -1 -11 449.440 31.2760   5
  -1  -1 -11 485.362 33.3005   2
   1  -1  11 381.112 36.8198   5
  -1   1 -11 479.837 32.2295   2
  -1   1 -11 462.989 34.0885   3
   1   1  11 447.727 31.9765   5
  -1   1 -11 468.519 32.3368   5
  -1   1 -11 479.912 35.1140   1
  -2  -1 -11 884.808 65.1445   1
  -2  -1 -11 921.619 66.4926   3
  -2  -1 -11 977.026 62.9312   5
  -2  -1 -11 913.661 64.4264   2
  -2   1 -11 955.704 66.0070   1
  -2   1 -11 1041.26 64.2762   5
  -2   1 -11 945.054 66.8557   3
  -2   1 -11 991.925 63.0459   2
   2   1  11 818.458 64.1311   5
  -3  -1 -11 118.613 13.3084   5
  -3  -1 -11 113.291 12.9307   1
  -3  -1 -11 115.384 17.2678   3
  -3   1 -11 127.145 16.8026   3
  -3   1 -11 113.678 11.7115   2
  -3   1 -11 112.592 14.3512   1
  -3   1 -11 117.051 14.8216   5
  -4  -1 -11 15.4049 4.90715   1
  -4  -1 -11 11.8013 8.81110   5
  -4  -1 -11 20.2208 11.9005   3
  -4   1 -11 13.3175 10.3409   5
  -4   1 -11 21.8755 11.8539   3
  -4   1 -11 29.1073 7.74098   1
  -5  -2  11 38.9314 15.8697   2
  -5  -2  11 45.1571 11.8823   4
  -5   2  11 49.3608 17.5422   5
  -5   2  11 18.5633 13.0060   2
  -4  -2  11 27.4655 12.6246   2
  -4  -2  11 49.0696 10.9488   4
  -4   2  11 32.9387 8.28974   4
  -4   2  11 30.6242 12.8980   2
  -3  -2  11 307.854 29.6838   2
  -3  -2  11 288.421 21.4471   3
   3  -2 -11 299.600 26.4392   3
  -3  -2  11 264.299 25.5534   4
   3  -2 -11 308.186 28.4326   1
  -3   2  11 339.761 29.3513   2
  -3   2  11 345.259 25.2270   4
  -3   2  11 373.190 29.6454   1
   3   2 -11 375.936 28.5736   1
   2  -2 -11 372.969 31.4047   1
   2  -2 -11 342.490 28.8276   3
  -2  -2  11 358.705 30.6115   2
  -2  -2  11 345.000 28.8633   4
  -2  -2  11 361.483 30.5386   1
   2   2 -11 391.789 25.7126   3
   2   2 -11 401.243 30.9902   1
  -2   2  11 380.171 30.4081   2
   1  -2 -11 346.680 31.2269   3
  -1  -2  11 385.369 32.3690   2
  -1  -2  11 360.897 32.1980   4
  -1  -2  11 394.166 33.9112   1
   1  -2 -11 358.654 33.5205   1
  -1   2  11 475.252 33.5572   2
   1   2 -11 485.589 34.6300   1
  -1   2  11 467.926 30.4746   5
   1   2 -11 487.041 33.4470   2
   1   2 -11 484.270 30.1116   3
   0  -2 -11 -1.3408 5.86937   1
   0  -2  11 -4.6186 5.41325   4
   0  -2  11 10.7130 5.25598   2
   0  -2 -11 -1.2424 4.95357   3
   0   2 -11 2.29580 6.02358   5
   0   2 -11 0.84962 6.68846   1
   0   2  11 -5.3124 2.95256   5
   0   2 -11 -0.6098 4.00112   2
   0   2 -11 -0.9135 4.62745   3
   0   2  11 2.21439 6.77085   2
  -1  -2 -11 554.775 43.6180   1
  -1  -2 -11 564.415 43.3650   3
  -1  -2 -11 537.716 39.8753   5
   1  -2  11 547.596 40.2557   2
  -1   2 -11 646.601 43.7856   3
  -1   2 -11 667.050 42.2575   5
   1   2  11 590.841 40.5008   5
  -1   2 -11 667.115 40.9951   2
  -1   2 -11 639.845 44.8818   1
  -2  -2 -11 219.619 23.4081   3
  -2  -2 -11 251.772 22.4821   1
  -2  -2 -11 259.207 19.2316   5
  -2   2 -11 299.579 21.8779   5
  -2   2 -11 278.222 24.6719   3
  -2   2 -11 279.918 23.9582   1
  -3  -2 -11 261.696 20.7264   5
  -3  -2 -11 255.067 21.3591   1
  -3  -2 -11 232.468 24.6097   3
  -3   2 -11 278.747 23.1214   5
  -3   2 -11 287.371 26.8365   3
  -3   2 -11 239.946 23.4184   1
  -4  -2 -11 68.4908 15.1887   3
  -4  -2 -11 56.6106 7.19906   1
  -4   2 -11 43.1476 13.3088   5
  -4   2 -11 85.3432 16.2820   3
  -4   2 -11 50.5961 10.6443   1
  -5  -3  11 12.7213 10.7617   4
  -5  -3  11 10.1457 14.1222   2
  -5   3  11 8.57981 12.9251   5
  -5   3  11 -1.5599 13.1905   2
  -4  -3  11 61.1300 13.6325   4
  -4  -3  11 60.4923 16.3706   2
  -4   3  11 98.9645 18.9408   5
  -4   3  11 90.7008 16.8638   2
   3  -3 -11 171.732 19.5404   3
  -3  -3  11 159.690 19.0137   4
  -3  -3  11 167.465 19.1774   1
  -3  -3  11 151.502 21.9150   2
   3  -3 -11 176.341 20.9337   1
   3  -3 -11 150.461 15.3536   4
   3   3 -11 230.583 20.8533   1
  -3   3  11 208.657 20.5746   2
   2  -3 -11 547.390 39.8730   3
  -2  -3  11 524.171 40.5709   1
   2  -3 -11 509.400 41.3987   1
  -2  -3  11 480.576 39.2495   4
  -2  -3  11 517.317 41.1478   2
   2   3 -11 607.447 41.6342   1
  -2   3  11 487.988 39.7376   2
  -1  -3  11 614.164 45.5594   2
  -1  -3  11 607.488 45.2788   4
   1  -3 -11 595.841 45.0916   3
   1  -3 -11 632.868 47.7245   1
   1   3 -11 670.228 42.6485   3
   1   3 -11 583.126 45.0217   5
  -1   3  11 633.678 45.9422   2
   1   3 -11 676.263 47.6846   1
   0  -3  11 1196.48 79.4001   2
   0  -3  11 1128.47 80.5840   4
   0  -3 -11 1201.06 82.5891   1
   0  -3 -11 1146.56 80.8159   3
   0   3 -11 1183.79 79.6623   2
   0   3  11 1271.25 76.9000   5
   0   3 -11 1208.98 82.6538   1
   0   3 -11 1113.50 80.0581   5
   0   3  11 1154.93 81.2500   2
   0   3 -11 1168.38 79.5910   3
  -1  -3 -11 259.030 20.8561   3
  -1  -3 -11 223.426 21.2201   1
   1  -3  11 238.117 20.8272   4
   1  -3  11 182.835 16.2797   2
  -1   3 -11 255.726 20.2580   5
  -1   3 -11 258.663 22.4493   1
  -1   3 -11 272.916 21.5755   3
  -2  -3 -11 192.225 21.6696   3
  -2  -3 -11 215.319 20.6361   1
  -2  -3 -11 234.464 16.6511   5
  -2   3 -11 279.104 21.7633   5
  -2   3 -11 255.257 23.2320   1
  -3  -3 -11 6.04978 8.47655   3
  -3  -3 -11 16.5899 7.12445   5
  -3  -3 -11 19.6171 6.27589   1
  -3   3 -11 20.8730 9.35934   5
  -3   3 -11 13.6129 8.49622   1
  -4  -3 -11 51.6768 13.9382   3
  -4   3 -11 43.8987 13.6152   5
  -4   3 -11 36.6122 13.3504   3
  -4   3 -11 40.3504 10.7244   1
  -5  -4  11 48.1387 18.0232   2
  -5  -4  11 32.0209 12.0397   4
  -5   4  11 29.6456 14.0935   2
  -5   4  11 6.99660 16.1051   5
  -5   4  11 41.2661 13.8332   1
  -4  -4  11 60.8083 13.5365   4
  -4  -4  11 60.1476 17.2001   2
  -4   4  11 25.2075 13.5660   2
  -4   4  11 39.0155 14.7873   5
   3  -4 -11 278.574 28.3660   3
  -3  -4  11 285.175 29.1498   2
   3  -4 -11 289.564 29.4782   1
  -3  -4  11 279.856 26.7249   4
  -3   4  11 299.261 29.1045   2
  -3   4  11 375.173 30.6480   5
   3   4 -11 345.692 28.6520   1
   2  -4 -11 511.960 39.9726   3
  -2  -4  11 533.694 40.8279   1
  -2  -4  11 508.057 41.0107   2
  -2  -4  11 510.422 39.5374   4
   2  -4 -11 533.268 42.1748   1
  -2   4  11 528.064 39.6740   5
   2   4 -11 570.347 41.5150   1
  -2   4  11 450.382 39.6069   2
  -1  -4  11 454.864 33.2656   2
  -1  -4  11 448.641 33.1251   4
   1  -4 -11 479.944 33.9320   3
   1  -4 -11 434.646 35.3476   1
   1   4 -11 363.493 32.0819   5
  -1   4  11 390.223 30.4571   5
   1   4 -11 427.186 29.1735   3
  -1   4  11 392.052 33.0163   2
   1   4 -11 405.061 34.2993   1
   0  -4  11 21.7669 6.45009   2
   0  -4 -11 18.8510 8.01189   3
   0  -4 -11 18.6647 8.49375   1
   0  -4  11 18.6841 7.57563   4
   0   4 -11 27.7099 8.61855   5
   0   4 -11 21.7279 7.00162   3
   0   4 -11 25.4000 9.06464   1
   1  -4  11 285.984 26.0176   4
  -1  -4 -11 328.880 27.5319   1
  -1  -4 -11 307.001 26.2251   3
   1  -4  11 277.698 21.3992   2
  -1   4 -11 419.588 30.1961   1
  -1   4 -11 374.179 26.5661   5
  -2  -4 -11 239.032 21.9146   1
  -2  -4 -11 251.086 22.6822   3
  -2   4 -11 219.630 21.4182   5
  -2   4 -11 258.570 24.6758   1
  -3  -4 -11 177.670 17.4814   1
  -3  -4 -11 174.229 21.0633   3
  -3   4 -11 181.524 21.7214   1
  -3   4 -11 211.779 22.2514   5
  -4  -4 -11 57.8165 13.2635   3
  -4   4 -11 37.4538 15.8011   5
  -4   4 -11 60.9831 12.6638   1
  -4  -5  11 165.807 21.4190   4
  -4  -5  11 131.467 22.8100   2
  -4   5  11 141.345 22.5382   2
  -4   5  11 131.895 23.8356   5
  -4   5  11 168.063 22.9372   1
  -3  -5  11 126.420 20.3636   2
  -3  -5  11 71.6943 13.5785   4
   3  -5 -11 121.096 18.6940   1
   3  -5 -11 70.8003 15.1028   3
  -3   5  11 100.726 17.1665   2
  -3   5  11 79.7689 15.5252   5
   2  -5 -11 534.269 41.1908   3
   2  -5 -11 507.259 41.8571   1
  -2  -5  11 532.329 39.9111   4
  -2  -5  11 509.150 40.7812   2
  -2   5  11 429.524 37.5654   5
   2   5 -11 525.099 40.9447   1
  -1  -5  11 358.802 28.7874   2
   1  -5 -11 318.599 30.4541   1
   1  -5 -11 369.403 30.0877   3
  -1  -5  11 286.844 27.9155   4
   1   5 -11 291.328 28.4502   5
  -1   5  11 310.723 29.0607   2
  -1   5  11 312.151 24.6701   5
   1   5 -11 369.474 24.3930   3
   1   5 -11 362.456 30.6767   1
   1   5 -11 357.630 24.4555   3
   0  -5 -11 657.379 49.4986   1
   0  -5  11 644.540 45.5182   2
   0  -5 -11 665.655 48.2614   3
   0  -5  11 627.440 47.2046   4
   0   5 -11 660.723 50.0543   1
   0   5 -11 602.462 46.6303   5
  -1  -5 -11 154.979 18.2527   3
  -1  -5 -11 134.492 17.8322   1
   1  -5  11 149.637 16.7669   4
   1  -5  11 141.271 11.2272   2
  -1   5 -11 191.037 20.8524   1
  -1   5 -11 158.396 17.9777   5
  -2  -5 -11 212.295 21.4709   1
  -2  -5 -11 201.284 22.0200   3
  -2   5 -11 227.536 24.0578   1
  -2   5 -11 222.801 22.4787   5
  -3  -5 -11 45.8978 9.38512   1
  -3  -5 -11 78.2925 14.3222   3
  -3   5 -11 27.8219 12.0981   5
  -3   5 -11 37.1957 12.4173   1
  -4  -5 -11 120.446 19.3376   3
  -4  -5 -11 141.143 22.0313   4
  -4   5 -11 81.9422 18.0478   5
  -4   5 -11 137.865 19.8384   1
  -4  -6  11 56.5434 16.2959   2
  -4  -6  11 62.6943 15.1014   4
  -4   6  11 44.8944 15.1713   1
  -4   6  11 41.4974 16.3993   2
  -4   6  11 63.3643 17.1536   5
  -3  -6  11 190.337 22.2934   4
   3  -6 -11 189.405 24.2804   1
  -3  -6  11 167.674 24.6544   2
   3  -6 -11 187.247 24.4911   3
  -3   6  11 163.301 21.4395   5
  -3   6  11 193.670 25.0405   1
   2  -6 -11 43.9997 13.6397   1
   2  -6 -11 33.2245 12.2403   3
  -2  -6  11 46.1337 11.4905   4
  -2  -6  11 50.4710 13.1606   2
  -2   6  11 41.4352 13.7268   2
  -2   6  11 36.8995 13.8097   1
   2   6 -11 37.3778 12.3461   1
  -2   6  11 27.2626 9.28612   5
   1  -6 -11 247.926 25.0337   3
  -1  -6  11 302.583 24.7470   2
  -1  -6  11 315.320 24.8810   4
   1  -6 -11 280.378 26.9523   1
   1   6 -11 214.915 22.9558   5
   1   6 -11 268.036 26.6355   1
  -1   6  11 219.576 25.6707   1
  -1   6  11 206.590 18.2051   5
   1   6 -11 229.173 18.6101   3
   0  -6 -11 53.6092 11.9122   3
   0  -6  11 55.8843 9.57181   2
   0  -6 -11 46.3654 12.6448   1
   0  -6  11 40.7799 10.9542   4
   0   6  11 41.9494 11.9430   1
   0   6 -11 50.0481 12.9280   5
   0   6 -11 45.9861 12.6694   1
  -1  -6 -11 157.271 18.9468   3
  -1  -6 -11 159.146 19.6297   1
   1  -6  11 125.660 17.2851   4
   1   6  11 159.247 23.4441   1
  -1   6 -11 121.568 19.7373   1
  -1   6 -11 133.898 18.6473   5
  -2  -6 -11 76.2322 14.3757   3
   2  -6  11 58.5512 11.7023   4
  -2  -6 -11 60.9223 12.3015   1
  -2   6 -11 49.8620 13.9924   5
  -2   6 -11 51.0275 13.8902   1
  -3  -6 -11 84.2917 13.3615   1
  -3  -6 -11 122.101 17.3857   3
  -3   6 -11 61.0881 14.5534   1
  -3   6 -11 54.7604 16.2362   5
  -4   7  11 38.2218 15.1033   5
  -3  -7  11 17.0543 13.6595   2
  -3  -7  11 17.3363 11.5548   4
   3  -7 -11 27.4187 14.7373   3
   3  -7 -11 30.0129 12.9284   1
  -3   7  11 -0.4934 12.4948   2
  -3   7  11 19.4131 13.5980   1
  -3   7  11 17.4163 11.4354   5
   2  -7 -11 89.0710 18.9326   3
  -2  -7  11 115.837 17.9190   4
  -2  -7  11 79.7602 16.8323   2
   2  -7 -11 139.084 21.9600   1
   2   7 -11 114.207 18.6162   1
  -2   7  11 108.944 20.0725   1
   1  -7 -11 94.7244 18.0857   1
  -1  -7  11 91.0783 15.4187   2
   1  -7 -11 105.834 18.0892   3
  -1  -7  11 92.0855 15.5812   4
   1   7 -11 95.6912 17.2543   1
   1   7 -11 105.675 18.1297   5
  -1   7  11 93.1947 18.5542   1
   0  -7  11 101.970 13.8374   2
   0  -7 -11 93.9319 16.4822   3
   0  -7 -11 92.2099 17.3777   1
   0  -7  11 79.3349 13.7201   4
   0   7  11 105.673 17.9698   1
   0   7 -11 88.1615 16.2791   5
   0   7 -11 72.4781 16.2868   1
  -1  -7 -11 25.7724 11.4106   3
  -1  -7 -11 27.8177 11.0962   1
   1  -7  11 16.4472 9.99492   4
  -1   7 -11 38.3760 14.5011   1
  -1   7 -11 28.4166 12.7319   5
   2  -7  11 57.6906 17.4239   4
  -2  -7 -11 76.5121 15.0969   3
  -2  -7 -11 68.6892 13.9407   1
  -2   7 -11 73.5534 17.7526   1
  -2   7 -11 40.2605 13.4501   5
  -3  -7 -11 40.2366 14.8393   4
  -3  -7 -11 40.6651 10.3731   1
  -3  -7 -11 48.6581 13.2684   3
  -3   7 -11 13.5417 15.7709   5
  -3   7 -11 31.1685 14.2691   1
   3  -8 -11 95.0817 18.9655   1
  -3  -8  11 96.9525 19.6583   4
  -3  -8  11 85.5071 19.1366   2
  -3   8  11 56.2675 17.3469   1
   2  -8 -11 20.8673 13.3494   1
   2  -8 -11 17.2552 13.6512   3
  -2  -8  11 13.3625 11.0312   4
  -2  -8  11 10.5755 12.1916   2
  -2   8  11 30.6181 15.1444   1
   1  -8 -11 36.3627 14.1927   3
  -1  -8  11 53.9568 13.2018   2
   1  -8 -11 52.3714 12.2237   4
   1  -8 -11 71.4295 16.4453   1
  -1  -8  11 38.5306 13.2868   4
  -1   8  11 87.7611 17.3560   1
   1   8 -11 69.2807 17.0266   1
   1   8 -11 74.2218 14.9888   5
   0  -8 -11 17.7727 13.1087   3
   0  -8  11 31.9727 10.9703   4
   0  -8 -11 18.6925 12.1744   1
   0   8 -11 30.5056 12.4982   5
   0   8 -11 29.1536 13.0916   1
  -1  -8 -11 60.5027 14.8350   4
  -1  -8 -11 68.6195 15.8092   1
   1  -8  11 32.5929 11.0510   4
  -1  -8 -11 58.3010 13.8897   3
  -1   8 -11 88.7102 19.7573   1
  -1   8 -11 47.9617 15.1726   5
  -2  -8 -11 41.3264 12.8936   4
  -2  -8 -11 43.0066 13.4275   3
  -2  -8 -11 60.8352 13.7811   1
  -2   8 -11 34.4490 14.1803   5
  -2   8 -11 63.6219 17.8236   1
  -2  -9  11 65.8561 16.1440   4
   2  -9 -11 72.6726 19.5450   1
  -2  -9  11 62.1763 16.1633   2
  -2   9  11 52.2273 17.8794   1
  -1  -9  11 7.24665 11.6223   4
   1  -9 -11 -8.4957 11.8296   1
   1  -9 -11 11.5154 13.7795   3
  -1   9  11 12.2925 14.4197   1
   1   9 -11 23.5549 12.7378   5
   1   9 -11 8.49729 18.5949   1
   0  -9 -11 53.4705 16.8767   1
   0  -9 -11 37.2573 14.4485   3
   0  -9  11 30.9195 11.9196   4
   0  -9 -11 51.0238 13.2600   4
   0   9 -11 27.3528 14.9397   1
   0   9 -11 35.7280 13.2567   5
  -1  -9 -11 30.3698 15.5276   1
  -1  -9 -11 12.0332 12.4095   3
  -1  -9 -11 22.8916 12.1348   4
  -1   9 -11 30.0632 15.8267   1
  -1   9 -11 25.9446 13.1065   5
  -5   0  12 72.2646 16.7392   2
  -4   0  12 151.983 16.9022   4
  -4   0  12 124.333 21.2113   2
  -3   0  12 821.861 59.8563   1
   3   0 -12 781.379 56.3843   3
  -3   0  12 829.297 55.5959   3
  -3   0  12 809.752 57.4793   4
   3   0 -12 793.236 59.8219   1
  -3   0  12 852.632 60.9170   2
   2   0 -12 475.237 33.2097   3
  -2   0  12 461.625 36.4555   2
  -2   0  12 450.376 32.6299   3
  -2   0  12 474.861 36.7367   1
  -2   0  12 438.666 34.4826   4
   2   0 -12 443.775 36.5665   1
   1   0 -12 650.256 49.8961   1
  -1   0  12 681.488 48.0631   5
  -1   0  12 666.255 48.5241   2
  -1   0  12 653.538 48.2654   4
  -1   0  12 716.295 47.3133   3
   1   0 -12 686.056 47.1300   3
   0   0  12 1016.13 68.0303   2
   0   0  12 1139.67 66.5453   5
   0   0 -12 966.540 67.8586   3
   0   0 -12 844.269 66.8194   5
   0   0 -12 1025.36 68.3681   2
   0   0 -12 968.115 69.9497   1
  -1   0 -12 314.997 26.5815   1
  -1   0 -12 324.987 25.7207   3
  -1   0 -12 321.213 24.2904   2
  -1   0 -12 323.332 23.6128   5
   1   0  12 299.705 23.8382   5
  -2   0 -12 508.341 43.2292   3
  -2   0 -12 545.634 42.5539   1
  -2   0 -12 629.522 40.3250   5
  -2   0 -12 582.661 40.6443   2
  -3   0 -12 205.312 18.8434   1
  -3   0 -12 179.804 21.8756   3
  -3   0 -12 191.286 18.5341   5
  -4   0 -12 100.545 12.1619   1
  -4   0 -12 99.1998 17.5826   3
  -4   0 -12 83.9997 14.3119   5
  -5  -1  12 23.2205 10.1545   4
  -5  -1  12 47.7325 15.3563   2
  -5   1  12 48.3744 16.4235   2
  -4  -1  12 215.340 27.2996   2
  -4  -1  12 256.052 22.6282   4
  -4   1  12 222.078 26.6541   2
  -4   1  12 250.751 21.6890   4
   3  -1 -12 442.539 37.6328   1
   3  -1 -12 522.207 35.6272   3
  -3  -1  12 471.134 35.7749   4
  -3  -1  12 440.731 37.0633   1
  -3  -1  12 429.401 37.7819   2
  -3  -1  12 454.911 32.1728   3
  -3   1  12 413.642 37.7858   2
  -3   1  12 485.170 38.0125   1
  -3   1  12 482.429 35.1044   4
   3   1 -12 474.251 37.6324   1
   2  -1 -12 431.816 34.2382   1
   2  -1 -12 407.847 30.8041   3
  -2  -1  12 393.802 33.0666   2
  -2  -1  12 402.011 33.3871   1
  -2  -1  12 420.480 32.2084   4
  -2  -1  12 418.743 29.3049   3
   2   1 -12 414.729 29.4000   3
   2   1 -12 398.667 33.5914   1
  -2   1  12 423.220 31.7408   4
  -2   1  12 399.589 32.8653   2
   1  -1 -12 825.408 55.9104   3
  -1  -1  12 746.703 56.3845   4
  -1  -1  12 846.915 55.1739   3
  -1  -1  12 815.229 57.0103   2
   1  -1 -12 886.597 59.0438   1
   1   1 -12 803.079 58.3703   1
  -1   1  12 799.111 56.8481   2
  -1   1  12 774.133 54.7037   5
   1   1 -12 774.411 54.6980   3
   0  -1 -12 239.452 21.6149   1
   0  -1  12 252.407 18.9829   2
   0  -1 -12 221.347 19.4716   3
   0  -1  12 207.583 20.3113   4
   0   1 -12 215.649 18.9216   3
   0   1 -12 217.660 21.3566   1
   0   1 -12 194.463 18.0689   5
   0   1  12 214.558 19.8439   2
   0   1  12 246.241 16.8724   5
   0   1 -12 213.335 18.7203   2
  -1  -1 -12 985.879 72.6506   3
  -1  -1 -12 1036.67 73.8201   2
  -1  -1 -12 1009.33 73.4753   1
  -1  -1 -12 999.916 70.1075   5
  -1   1 -12 1099.69 74.1627   1
  -1   1 -12 1086.95 73.0974   3
   1   1  12 1004.19 70.6927   5
  -1   1 -12 1157.10 71.3976   2
  -1   1 -12 1127.16 71.2244   5
  -2  -1 -12 495.485 30.1221   5
  -2  -1 -12 444.683 33.0664   1
  -2  -1 -12 465.586 33.9518   3
   2   1  12 359.546 31.2462   5
  -2   1 -12 410.668 30.8197   5
  -2   1 -12 416.691 33.2829   1
  -2   1 -12 399.073 29.8184   2
  -2   1 -12 355.574 32.8654   3
  -3  -1 -12 250.863 19.7128   5
  -3  -1 -12 231.855 20.3433   1
  -3  -1 -12 242.063 24.2093   3
  -3   1 -12 223.599 21.3521   5
  -3   1 -12 203.527 21.2892   1
  -3   1 -12 205.240 23.2718   3
  -4  -1 -12 30.2961 6.39058   1
  -4  -1 -12 43.3579 13.6760   3
  -4  -1 -12 23.7800 9.61201   5
  -4   1 -12 23.0331 7.97104   1
  -4   1 -12 0.65131 11.6074   3
  -4   1 -12 37.5668 11.8256   5
  -5  -2  12 122.848 21.8662   2
  -5  -2  12 107.840 16.8926   4
  -5   2  12 123.869 23.3413   5
  -5   2  12 115.768 20.8862   2
  -4  -2  12 35.6629 13.3136   2
  -4  -2  12 34.8362 10.8597   4
  -4   2  12 22.5702 12.0209   2
  -4   2  12 43.3063 9.23782   4
  -3  -2  12 550.742 44.5125   2
   3  -2 -12 564.953 41.3180   3
   3  -2 -12 589.907 44.1712   1
  -3  -2  12 538.733 41.3200   4
   3   2 -12 535.977 42.6638   1
  -3   2  12 495.945 43.0303   2
  -3   2  12 541.840 39.7789   4
   2  -2 -12 214.327 19.1049   3
   2  -2 -12 212.384 21.5484   1
  -2  -2  12 230.287 20.1677   4
  -2  -2  12 237.804 22.0838   2
  -2  -2  12 242.367 21.4291   1
   2   2 -12 165.633 14.9500   3
   2   2 -12 186.918 20.7450   1
  -2   2  12 182.228 20.4438   2
  -1  -2  12 765.936 52.5288   2
   1  -2 -12 801.506 51.9873   3
   1  -2 -12 814.282 54.7018   1
  -1  -2  12 733.397 52.4350   4
  -1   2  12 704.307 52.5550   2
   1   2 -12 708.369 49.6419   3
   1   2 -12 690.188 53.6921   1
  -1   2  12 679.703 49.7086   5
   0  -2 -12 1466.67 104.159   3
   0  -2  12 1589.55 103.365   2
   0  -2  12 1522.34 104.909   4
   0  -2 -12 1501.91 105.905   1
   0   2 -12 1638.20 106.607   1
   0   2 -12 1506.95 103.678   5
   0   2 -12 1555.73 103.584   3
   0   2  12 1570.33 104.592   2
   0   2 -12 1606.47 103.895   2
   1  -2  12 104.058 9.74052   2
  -1  -2 -12 113.762 13.7244   3
  -1  -2 -12 102.617 13.7910   1
  -1  -2 -12 90.2958 8.80303   5
  -1   2 -12 93.6176 14.0132   1
  -1   2 -12 97.4477 12.7827   3
   1   2  12 90.2584 9.54784   5
  -1   2 -12 88.5028 9.52905   2
  -1   2 -12 100.319 12.4362   5
  -2  -2 -12 484.025 36.8750   1
  -2  -2 -12 447.734 37.2822   3
  -2  -2 -12 524.970 33.4650   5
  -2   2 -12 483.808 32.6138   2
  -2   2 -12 430.344 37.8632   3
  -2   2 -12 491.949 38.2786   1
  -2   2 -12 491.734 35.8931   5
  -3  -2 -12 62.2866 9.93973   1
  -3  -2 -12 63.1850 9.67492   5
  -3  -2 -12 73.8417 14.0796   3
  -3   2 -12 66.6884 13.9176   3
  -3   2 -12 56.7595 12.0388   5
  -3   2 -12 45.9680 10.6906   1
  -4  -2 -12 127.254 18.4433   3
  -4  -2 -12 135.448 11.5655   1
  -4   2 -12 117.613 19.0077   5
  -4   2 -12 85.1344 17.2398   3
  -4   2 -12 120.509 16.0847   1
  -5  -3  12 31.4617 15.7631   2
  -5  -3  12 52.5720 13.8980   4
  -5   3  12 36.6862 15.9196   2
  -5   3  12 22.4451 14.7738   5
  -4  -3  12 127.785 21.1446   2
  -4  -3  12 133.184 18.6895   4
  -4   3  12 161.629 21.9262   5
  -4   3  12 117.387 21.0856   2
   3  -3 -12 199.179 19.6874   3
   3  -3 -12 192.316 21.5509   1
  -3  -3  12 200.671 19.9427   4
  -3  -3  12 150.523 22.1001   2
  -3   3  12 126.337 20.3023   2
   3   3 -12 152.794 19.7634   1
  -2  -3  12 358.714 27.8616   4
   2  -3 -12 350.116 28.1500   3
   2  -3 -12 361.117 30.4774   1
  -2  -3  12 359.896 29.7111   2
   2   3 -12 326.348 29.5256   1
  -2   3  12 315.342 29.3036   2
   2   3 -12 309.639 22.3749   3
  -1  -3  12 437.757 33.4941   4
   1  -3 -12 417.601 35.2528   1
  -1  -3  12 468.427 33.8020   2
   1  -3 -12 472.171 33.4848   3
   1   3 -12 423.358 29.8593   3
   1   3 -12 429.801 34.9921   1
   1   3 -12 359.039 32.5191   5
  -1   3  12 428.810 34.0035   2
  -1   3  12 408.394 29.8305   5
   0  -3 -12 390.952 33.0229   1
   0  -3  12 412.964 29.7675   2
   0  -3 -12 428.462 31.7411   3
   0  -3  12 376.327 31.4410   4
   0   3  12 361.417 31.9109   2
   0   3 -12 418.844 29.9004   2
   0   3 -12 406.250 33.4041   1
   0   3 -12 383.072 30.4156   5
   0   3 -12 399.334 29.7328   3
  -1  -3 -12 698.396 50.0365   1
   1  -3  12 620.448 44.8181   2
   1  -3  12 698.261 48.9839   4
  -1  -3 -12 740.825 49.5818   3
  -1   3 -12 673.934 45.3331   2
  -1   3 -12 658.706 48.5987   3
  -1   3 -12 658.296 50.3288   1
  -1   3 -12 671.052 47.6866   5
  -2  -3 -12 292.625 26.3543   3
  -2  -3 -12 277.971 20.1814   5
  -2  -3 -12 291.435 25.0116   1
  -2   3 -12 303.596 24.9232   5
  -2   3 -12 306.084 27.3975   3
  -2   3 -12 293.661 26.7148   1
  -3  -3 -12 286.734 21.7671   1
  -3  -3 -12 271.437 24.7163   3
  -3   3 -12 229.672 22.9618   5
  -3   3 -12 217.295 25.1163   3
  -3   3 -12 218.735 23.8399   1
  -4  -3 -12 29.1659 12.3476   3
  -4   3 -12 29.6766 13.8968   3
  -4   3 -12 30.2041 13.4828   5
  -4   3 -12 27.2797 9.90639   1
  -5  -4  12 72.9491 15.1111   4
  -5   4  12 79.8731 20.4548   5
  -5   4  12 46.8793 17.1411   2
  -4  -4  12 42.4608 12.8530   4
  -4  -4  12 31.0433 13.3522   2
  -4   4  12 16.5103 13.2431   5
  -4   4  12 25.6135 13.9473   2
   3  -4 -12 75.4570 14.8396   3
  -3  -4  12 70.0871 15.1301   2
   3  -4 -12 110.850 17.4677   1
  -3  -4  12 78.0446 14.3897   4
  -3   4  12 51.3952 14.1999   2
   3   4 -12 70.9787 13.3739   1
  -3   4  12 72.9168 14.5413   5
   2  -4 -12 72.3611 12.6788   3
  -2  -4  12 72.1008 12.7918   4
  -2  -4  12 77.8327 13.8837   2
   2  -4 -12 82.0868 14.8857   1
   2   4 -12 35.9506 11.7804   1
  -2   4  12 40.1549 12.6578   2
  -2   4  12 42.0771 10.9049   5
  -1  -4  12 563.930 37.4895   2
   1  -4 -12 504.820 39.6324   1
  -1  -4  12 491.174 37.0385   4
   1  -4 -12 545.248 37.5852   3
   1   4 -12 473.329 38.8230   1
  -1   4  12 423.914 34.1220   5
   1   4 -12 499.351 33.1980   3
  -1   4  12 448.674 37.1864   2
   1   4 -12 382.474 36.3112   5
   0  -4  12 497.338 34.1147   2
   0  -4 -12 478.512 36.4348   3
   0  -4 -12 475.985 37.8073   1
   0  -4  12 428.049 35.2260   4
   0   4 -12 452.535 34.0374   3
   0   4 -12 444.230 35.5768   5
   0   4 -12 449.947 37.8426   1
  -1  -4 -12 141.545 17.8063   1
  -1  -4 -12 168.067 17.2874   3
   1  -4  12 153.050 11.7847   2
   1  -4  12 159.350 17.1439   4
  -1   4 -12 130.744 18.7254   1
  -1   4 -12 167.066 17.8252   5
  -2  -4 -12 118.012 15.4544   1
  -2  -4 -12 136.234 17.5910   3
  -2   4 -12 131.615 18.5554   1
  -2   4 -12 125.378 15.7484   5
  -3  -4 -12 116.927 17.6569   3
  -3  -4 -12 112.366 13.9414   1
  -3   4 -12 95.3050 16.3917   5
  -3   4 -12 108.366 17.5908   1
  -4  -4 -12 57.2420 13.3374   3
  -4   4 -12 44.4881 14.4316   5
  -4   4 -12 67.1054 13.2431   1
  -4  -5  12 44.2269 13.0761   4
  -4  -5  12 9.14642 12.3019   2
  -4   5  12 31.9714 13.5852   2
  -4   5  12 34.5485 14.4707   5
  -3  -5  12 101.268 16.4659   4
   3  -5 -12 81.0220 16.7641   3
   3  -5 -12 92.1184 18.0044   1
  -3  -5  12 102.133 18.4866   2
  -3   5  12 84.8839 15.9821   5
  -3   5  12 60.6573 14.8150   2
  -2  -5  12 15.9157 10.5092   2
   2  -5 -12 15.3900 11.2306   3
  -2  -5  12 27.2877 10.0110   4
   2  -5 -12 19.5223 11.4639   1
   2   5 -12 22.4826 10.8194   1
  -2   5  12 1.31357 11.8593   2
  -2   5  12 14.7954 8.80112   5
   1  -5 -12 197.276 22.9638   1
   1  -5 -12 196.055 21.3096   3
  -1  -5  12 209.797 20.3693   4
  -1  -5  12 220.420 20.7706   2
   1   5 -12 216.073 22.7104   1
   1   5 -12 193.084 15.1264   3
  -1   5  12 145.782 20.4511   2
   1   5 -12 156.201 19.2415   5
  -1   5  12 175.789 15.6341   5
   0  -5 -12 91.3069 13.7859   3
   0  -5  12 75.2348 11.5651   2
   0  -5 -12 67.6743 13.5099   1
   0  -5  12 88.8189 13.7664   4
   0   5 -12 75.6220 14.4345   1
   0   5 -12 71.2080 13.1829   5
   0   5 -12 71.0425 11.0055   3
  -1  -5 -12 175.740 20.5851   1
  -1  -5 -12 193.909 19.9283   3
   1  -5  12 176.049 19.8423   4
  -1   5 -12 175.219 20.1638   5
  -1   5 -12 201.308 23.0210   1
  -2  -5 -12 89.3268 14.5880   1
  -2  -5 -12 82.6340 14.1236   3
  -2   5 -12 90.2126 16.1356   1
  -2   5 -12 86.5882 14.9061   5
  -3  -5 -12 28.6139 8.26131   1
  -3  -5 -12 25.1576 10.6127   3
  -3   5 -12 10.8641 13.1772   5
  -3   5 -12 6.29515 10.7435   1
  -4  -6  12 19.5536 14.6405   2
  -4  -6  12 33.4947 13.0994   4
  -4   6  12 15.1748 15.3315   2
  -4   6  12 17.3797 14.4764   5
  -4   6  12 -2.9035 12.7629   1
  -3  -6  12 36.8264 14.5350   2
  -3  -6  12 12.9435 10.4539   4
   3  -6 -12 17.9399 14.0261   3
   3  -6 -12 31.0156 12.2495   1
  -3   6  12 50.0120 13.2595   5
  -3   6  12 10.7362 13.9567   2
  -3   6  12 46.6955 15.1207   1
  -2  -6  12 63.1634 14.1108   2
   2  -6 -12 34.0175 13.6176   3
  -2  -6  12 29.8877 11.7719   4
   2  -6 -12 35.7755 13.2352   1
  -2   6  12 19.3631 8.66515   5
   2   6 -12 45.0279 12.5796   1
  -2   6  12 37.9189 14.2445   2
   1  -6 -12 98.4650 16.4179   3
  -1  -6  12 84.6250 14.3467   4
   1  -6 -12 96.0644 17.1962   1
  -1  -6  12 91.5369 15.5560   2
   1   6 -12 90.2168 15.4058   5
   1   6 -12 90.3113 15.9836   1
   0  -6  12 338.600 27.5901   2
   0  -6 -12 370.792 30.7309   3
   0  -6 -12 354.297 32.7765   1
   0  -6  12 332.870 29.8337   4
   0   6 -12 388.529 33.9739   1
   0   6  12 328.261 31.7362   1
   0   6 -12 346.522 30.9602   5
  -1  -6 -12 206.906 22.1909   3
   1  -6  12 197.140 21.4679   4
  -1  -6 -12 249.340 24.9535   1
  -1   6 -12 202.498 21.7038   5
  -1   6 -12 248.441 26.3153   1
  -2  -6 -12 64.9501 13.1045   1
  -2  -6 -12 64.5914 14.3179   3
  -2   6 -12 96.8437 18.0986   1
  -2   6 -12 57.5502 14.6204   5
  -3  -6 -12 43.4142 13.8985   3
  -3  -6 -12 61.4834 11.5799   1
  -3   6 -12 65.3584 16.6650   5
  -3   6 -12 88.2792 17.2304   1
  -3  -7  12 -1.2071 10.6069   4
   3  -7 -12 8.45669 13.9883   3
   3  -7 -12 12.0662 13.1834   1
  -3  -7  12 7.15151 12.9540   2
  -3   7  12 7.83594 13.6597   2
  -3   7  12 29.8194 15.0551   1
   2  -7 -12 49.1351 13.6010   3
   2  -7 -12 37.2016 14.1212   1
  -2  -7  12 21.7163 12.3129   2
  -2  -7  12 15.4086 11.7905   4
   2   7 -12 22.5897 13.7800   1
  -2   7  12 36.0863 14.7314   1
   1  -7 -12 58.9775 14.0808   3
  -1  -7  12 56.5977 12.6459   2
  -1  -7  12 45.4506 12.7064   4
   1  -7 -12 93.9308 18.2610   1
   1   7 -12 45.5887 13.0135   5
   1   7 -12 54.3187 15.4594   1
  -1   7  12 36.8790 13.9777   1
   0  -7 -12 149.710 19.4622   3
   0  -7  12 158.289 19.1183   4
   0  -7 -12 124.675 20.5031   1
   0   7 -12 130.586 19.9485   5
   0   7  12 126.614 20.8346   1
   0   7 -12 145.655 22.5485   1
  -1  -7 -12 99.9110 16.4759   3
  -1  -7 -12 69.6057 15.4763   1
   1  -7  12 98.5654 14.8979   4
  -1   7 -12 80.7904 18.0243   1
  -1   7 -12 40.2240 13.2367   5
  -2  -7 -12 62.8648 14.6522   3
  -2  -7 -12 65.0709 13.5671   1
  -2   7 -12 70.0985 17.1937   1
  -2   7 -12 26.5878 13.1941   5
  -3  -7 -12 29.4949 9.28312   1
  -3  -7 -12 40.9575 13.8825   3
  -3  -8  12 42.3997 15.9140   2
   3  -8 -12 26.2496 15.3977   1
  -3   8  12 21.3521 15.7230   1
   2  -8 -12 58.5964 15.6032   3
  -2  -8  12 54.7976 15.3519   2
  -2  -8  12 64.2440 15.0743   4
   2  -8 -12 38.8874 14.9571   1
  -2   8  12 42.6103 15.9720   1
  -1  -8  12 50.7688 12.6856   2
   1  -8 -12 56.4810 16.5463   1
  -1  -8  12 35.1235 12.4970   4
   1  -8 -12 73.3727 16.2957   3
   1   8 -12 52.8246 15.0825   5
  -1   8  12 17.4583 13.8187   1
   1   8 -12 29.6932 13.0723   1
   0  -8 -12 -0.9183 10.9295   1
   0  -8  12 6.99937 10.1961   4
   0  -8 -12 1.21239 11.4871   3
   0   8 -12 15.2035 11.7618   5
   0   8 -12 4.50182 11.5136   1
   1  -8  12 83.7054 14.6239   4
  -1  -8 -12 107.754 19.1338   1
  -1  -8 -12 116.983 18.2817   3
  -1   8 -12 98.5982 20.2918   1
  -1   8 -12 72.0641 15.9818   5
  -2  -8 -12 24.2917 12.5808   3
  -2  -8 -12 14.4377 12.2131   4
  -2  -8 -12 13.5870 11.1846   1
  -2   8 -12 25.4487 14.9755   1
   1  -9 -12 22.5654 14.4836   1
   1  -9 -12 -1.3758 13.7207   3
  -1  -9  12 3.50396 10.9959   4
   1   9 -12 21.4756 13.7900   5
   0  -9 -12 5.15722 12.6020   1
   0  -9  12 25.7462 12.1242   4
   0  -9 -12 22.6365 11.2631   4
   0  -9 -12 46.5645 14.3860   3
   0   9 -12 48.6588 13.9377   5
   0   9 -12 5.71244 12.9330   1
  -5   0  13 34.1129 15.7090   2
  -4   0  13 429.625 39.4829   2
  -4   0  13 450.401 35.1713   4
  -3   0  13 368.004 33.3127   2
  -3   0  13 407.609 37.1072   1
   3   0 -13 405.323 33.7242   1
  -3   0  13 399.481 28.5762   3
  -3   0  13 364.371 30.7042   4
   3   0 -13 378.484 29.4771   3
  -2   0  13 427.913 35.3021   2
  -2   0  13 412.056 33.8848   4
   2   0 -13 453.701 36.5847   1
  -2   0  13 448.265 32.1021   3
   2   0 -13 461.959 32.5777   3
  -1   0  13 307.662 24.1725   3
   1   0 -13 266.532 25.2513   1
  -1   0  13 263.014 23.4582   4
   1   0 -13 273.235 21.9569   3
  -1   0  13 265.423 23.9103   2
   0   0 -13 615.503 44.5766   1
   0   0 -13 520.886 40.7487   5
   0   0  13 572.514 42.2176   2
   0   0  13 635.178 40.2778   5
   0   0 -13 577.135 41.9357   3
  -1   0 -13 252.284 20.4326   5
  -1   0 -13 303.244 24.6370   1
   1   0  13 232.661 20.6938   5
  -1   0 -13 268.766 22.7445   3
  -1   0 -13 294.148 21.9044   2
  -2   0 -13 393.269 27.8666   5
  -2   0 -13 351.111 31.1616   3
  -2   0 -13 345.476 30.3235   1
  -2   0 -13 378.245 28.2323   2
  -3   0 -13 68.2668 14.6347   3
  -3   0 -13 66.0021 11.6114   5
  -3   0 -13 68.3334 11.3371   1
  -4   0 -13 22.1774 11.5315   3
  -4   0 -13 31.2128 11.2622   5
  -4   0 -13 54.0326 9.40554   1
  -5  -1  13 25.2764 10.4342   4
  -5  -1  13 13.9395 13.0015   2
  -5   1  13 3.96761 12.4369   2
  -4  -1  13 59.8868 15.3366   2
  -4  -1  13 59.2370 12.1777   4
  -4   1  13 37.0698 10.1570   4
  -4   1  13 33.9561 14.3716   2
  -3  -1  13 507.333 36.6509   4
  -3  -1  13 539.739 38.9720   1
  -3  -1  13 439.402 38.8116   2
   3  -1 -13 501.604 35.5736   3
   3  -1 -13 501.919 39.0821   1
  -3   1  13 412.352 35.3501   4
   3   1 -13 456.172 38.0881   1
  -3   1  13 371.792 37.1319   2
   2  -1 -13 420.656 34.4995   1
  -2  -1  13 433.297 29.2979   3
  -2  -1  13 408.611 32.3439   4
   2  -1 -13 404.154 31.0019   3
  -2  -1  13 404.585 33.0803   2
   2   1 -13 422.095 34.1372   1
  -2   1  13 385.777 31.6658   4
   2   1 -13 396.265 29.2375   3
  -2   1  13 362.849 32.6423   2
   1  -1 -13 963.975 64.6131   3
   1  -1 -13 963.436 67.5411   1
  -1  -1  13 948.595 65.7078   4
  -1  -1  13 1005.22 63.9502   3
  -1  -1  13 976.020 65.6915   2
   1   1 -13 948.065 67.3982   1
   1   1 -13 885.279 63.3027   3
  -1   1  13 817.992 65.1917   2
  -1   1  13 925.422 63.2428   5
   0  -1  13 391.973 29.7148   2
   0  -1 -13 411.285 30.2379   3
   0  -1 -13 399.945 32.5480   1
   0  -1  13 357.915 30.7166   4
   0   1 -13 343.560 29.2703   5
   0   1 -13 405.619 32.5990   1
   0   1  13 378.604 30.6699   2
   0   1 -13 384.154 29.6193   3
   0   1 -13 384.204 29.8539   2
   0   1  13 444.850 27.7816   5
  -1  -1 -13 589.332 42.4548   3
  -1  -1 -13 616.882 43.4735   1
  -1  -1 -13 586.436 39.3325   5
  -1   1 -13 550.490 43.2008   1
   1   1  13 536.501 39.6688   5
  -1   1 -13 528.782 41.8390   3
  -1   1 -13 574.400 40.2481   2
  -1   1 -13 562.722 40.3598   5
  -2  -1 -13 118.901 14.7493   1
  -2  -1 -13 107.366 15.6900   3
  -2  -1 -13 130.015 11.6455   5
  -2   1 -13 106.722 15.7104   3
  -2   1 -13 95.5311 15.1568   1
   2   1  13 96.2954 12.9804   5
  -2   1 -13 88.5423 11.0199   2
  -2   1 -13 95.0039 12.6541   5
  -3  -1 -13 261.482 26.5946   3
  -3  -1 -13 304.091 23.6025   1
  -3  -1 -13 278.045 21.7741   5
  -3   1 -13 226.386 26.0666   3
  -3   1 -13 248.909 23.0275   5
  -3   1 -13 251.533 24.0031   1
  -4  -1 -13 64.9245 10.1411   1
  -4  -1 -13 63.8384 14.6458   3
  -4   1 -13 43.1311 12.4658   5
  -4   1 -13 61.3968 15.9779   3
  -4   1 -13 52.1541 10.4202   1
  -5  -2  13 22.2554 11.2743   4
  -5  -2  13 25.8369 15.1683   2
  -5   2  13 36.7787 15.9524   2
  -4  -2  13 336.899 33.7837   2
  -4  -2  13 334.982 29.0521   4
  -4   2  13 279.570 31.7265   2
  -4   2  13 340.047 26.7261   4
   3  -2 -13 177.339 21.0637   1
  -3  -2  13 150.826 21.6497   2
   3  -2 -13 148.032 17.9871   3
  -3  -2  13 160.581 18.4938   4
  -3   2  13 155.497 20.2215   2
   3   2 -13 183.718 20.2847   1
   2  -2 -13 524.937 39.4124   1
   2  -2 -13 494.231 35.9410   3
  -2  -2  13 518.084 38.5130   2
  -2  -2  13 472.329 36.6705   4
   2   2 -13 429.562 32.4317   3
  -2   2  13 429.540 36.7134   2
   2   2 -13 470.266 38.3011   1
  -1  -2  13 54.0699 10.1625   2
   1  -2 -13 38.1384 8.91174   3
  -1  -2  13 27.9484 10.0306   4
   1  -2 -13 57.7672 12.0845   1
   1   2 -13 47.6918 11.6410   1
  -1   2  13 32.4075 10.6276   2
  -1   2  13 55.9406 7.70990   5
   1   2 -13 54.5434 7.78628   3
   0  -2  13 140.849 17.4112   4
   0  -2 -13 169.675 17.0355   3
   0  -2 -13 186.904 19.0911   1
   0  -2  13 156.501 15.6005   2
   0   2 -13 179.348 19.3221   1
   0   2  13 160.666 17.8154   2
   0   2 -13 179.302 15.8195   2
   0   2  13 171.092 13.1371   5
   0   2 -13 139.030 15.5292   5
   0   2 -13 175.408 16.1836   3
  -1  -2 -13 333.910 24.6234   5
   1  -2  13 324.483 25.1725   2
  -1  -2 -13 386.347 29.1465   3
  -1  -2 -13 348.619 29.2728   1
  -1   2 -13 374.457 27.4310   5
  -1   2 -13 353.619 28.1185   3
  -1   2 -13 380.200 30.4254   1
  -1   2 -13 362.751 25.7534   2
   1   2  13 322.915 25.0763   5
  -2  -2 -13 202.796 19.4249   3
  -2  -2 -13 192.611 14.4803   5
  -2  -2 -13 190.940 18.5846   1
  -2   2 -13 144.564 19.2076   1
  -2   2 -13 157.931 17.3534   5
  -2   2 -13 146.047 19.3276   3
  -3  -2 -13 26.0533 8.22712   1
  -3  -2 -13 20.6363 10.2412   3
  -3   2 -13 22.0539 10.0739   5
  -3   2 -13 23.4642 10.5168   3
  -3   2 -13 27.4606 9.80193   1
  -4  -2 -13 44.0046 14.2682   3
  -4  -2 -13 22.1935 6.14883   1
  -4   2 -13 30.9659 12.6636   5
  -4   2 -13 42.2614 14.5310   3
  -4   2 -13 33.6859 9.99592   1
  -5  -3  13 18.5091 16.4569   2
  -5  -3  13 64.0574 14.7519   4
  -5   3  13 45.7132 17.2133   2
  -5   3  13 37.7685 16.0988   5
  -4  -3  13 34.1539 11.9711   4
  -4  -3  13 28.8564 14.4117   2
  -4   3  13 17.7633 12.4503   2
  -3  -3  13 372.195 34.4959   2
   3  -3 -13 380.273 31.7435   3
  -3  -3  13 338.939 31.5453   4
   3  -3 -13 423.734 34.7692   1
   3   3 -13 406.803 33.6118   1
  -3   3  13 336.346 33.2945   2
   2  -3 -13 117.445 15.5176   3
  -2  -3  13 106.993 15.8239   4
  -2  -3  13 108.740 17.5002   2
   2  -3 -13 123.866 17.9921   1
  -2   3  13 92.3771 15.9848   2
   2   3 -13 125.588 17.3889   1
   2   3 -13 117.863 9.43684   3
  -1  -3  13 564.899 45.0126   4
  -1  -3  13 640.129 45.1569   2
   1  -3 -13 590.084 47.2722   1
   1  -3 -13 566.790 44.7031   3
   1   3 -13 656.773 47.6633   1
   1   3 -13 619.252 41.8845   3
  -1   3  13 633.364 41.8723   5
  -1   3  13 563.099 45.2588   2
   0  -3  13 165.495 16.1906   2
   0  -3 -13 182.004 18.5774   3
   0  -3  13 125.610 18.0601   4
   0  -3 -13 194.816 20.6549   1
   0   3  13 206.443 20.2821   2
   0   3 -13 182.271 17.6475   5
   0   3 -13 174.214 20.3591   1
   0   3 -13 196.824 16.7620   2
   0   3 -13 183.209 16.7989   3
  -1  -3 -13 661.646 49.7505   1
  -1  -3 -13 611.990 48.1824   3
   1  -3  13 648.243 48.6813   4
   1  -3  13 666.688 44.5014   2
  -1   3 -13 671.188 47.4538   5
  -1   3 -13 715.314 50.8547   1
  -1   3 -13 644.572 48.1926   3
  -1   3 -13 660.605 45.0241   2
  -2  -3 -13 170.587 18.4280   1
  -2  -3 -13 161.289 19.6290   3
  -2   3 -13 151.257 19.6235   3
  -2   3 -13 171.686 20.3857   1
  -2   3 -13 176.415 18.5130   5
  -3  -3 -13 158.589 18.8525   3
  -3  -3 -13 151.820 15.8230   1
  -3   3 -13 119.648 16.9329   5
  -3   3 -13 132.897 20.4440   3
  -3   3 -13 131.555 18.6667   1
  -4  -3 -13 14.7533 10.9813   3
  -4   3 -13 35.2138 10.5532   1
  -4   3 -13 35.0050 14.1930   3
  -4   3 -13 -8.3519 12.3452   5
  -4  -4  13 210.587 27.3400   2
  -4  -4  13 183.257 22.8051   4
  -4   4  13 146.110 24.0673   2
  -4   4  13 174.441 25.4920   5
  -3  -4  13 114.300 16.2552   4
   3  -4 -13 83.6775 16.2032   1
  -3  -4  13 78.3269 15.7369   2
   3  -4 -13 96.1616 15.9892   3
  -3   4  13 67.3311 15.2968   5
   3   4 -13 80.1625 15.5490   1
  -3   4  13 52.6109 14.4698   2
   2  -4 -13 537.002 40.9934   3
  -2  -4  13 508.499 41.4879   2
  -2  -4  13 483.277 39.9991   4
   2  -4 -13 526.141 43.1611   1
   2   4 -13 566.179 42.5422   1
  -2   4  13 480.267 39.2958   5
  -2   4  13 517.267 41.6709   2
  -1  -4  13 115.333 17.5449   4
   1  -4 -13 135.987 19.7846   1
  -1  -4  13 144.993 17.7750   2
   1  -4 -13 131.707 16.8904   3
  -1   4  13 160.732 20.1858   2
   1   4 -13 141.456 18.2829   5
   1   4 -13 146.394 19.8744   1
  -1   4  13 157.981 14.8396   5
  -1   4  13 171.187 13.1178   5
   1   4 -13 159.827 13.3101   3
   0  -4 -13 521.818 40.2812   3
   0  -4  13 533.328 38.0710   2
   0  -4  13 510.991 40.2978   4
   0  -4 -13 531.097 42.3519   1
   0   4 -13 549.572 42.7721   1
   0   4 -13 520.576 38.5355   3
   0   4 -13 516.296 39.6170   5
   1  -4  13 160.172 13.0242   2
  -1  -4 -13 148.504 19.0849   1
  -1  -4 -13 166.055 18.0909   3
   1  -4  13 139.024 18.0333   4
  -1   4 -13 165.486 17.6994   5
  -1   4 -13 175.516 20.8675   1
  -1   4 -13 200.736 18.6632   3
  -2  -4 -13 167.323 18.1268   3
  -2  -4 -13 141.652 17.1357   1
  -2   4 -13 119.846 17.8885   5
  -2   4 -13 127.854 18.7271   3
  -2   4 -13 140.760 19.1642   1
  -3  -4 -13 27.3947 8.46535   1
  -3  -4 -13 29.3183 11.3651   3
  -3   4 -13 12.8958 11.8237   5
  -3   4 -13 15.7958 11.0401   3
  -3   4 -13 32.6254 11.2206   1
  -4  -4 -13 17.1747 11.4662   3
  -4   4 -13 2.76741 8.98247   1
  -4   4 -13 -11.988 13.7962   5
  -4  -5  13 10.0509 14.0168   2
  -4  -5  13 1.59771 11.0544   4
  -4   5  13 -5.8735 12.8525   5
  -4   5  13 -15.270 13.6606   2
   3  -5 -13 218.860 25.4263   1
   3  -5 -13 198.166 23.7680   3
  -3  -5  13 193.230 23.2903   4
  -3  -5  13 219.424 26.1708   2
  -3   5  13 151.842 23.9400   2
  -3   5  13 170.056 23.2778   5
  -2  -5  13 119.814 19.0470   2
   2  -5 -13 137.921 19.3111   3
   2  -5 -13 145.141 20.5303   1
  -2  -5  13 128.490 17.7505   4
  -2   5  13 105.497 15.6286   5
   2   5 -13 129.690 19.2342   1
   1  -5 -13 427.663 32.7756   1
  -1  -5  13 356.592 28.3070   2
   1  -5 -13 362.369 29.8032   3
  -1  -5  13 342.435 28.8144   4
  -1   5  13 289.151 23.8379   5
  -1   5  13 273.975 28.5252   2
   1   5 -13 362.913 31.2890   1
   1   5 -13 288.285 27.9947   5
   1   5 -13 313.844 23.7119   3
   0  -5  13 45.2274 9.05257   2
   0  -5 -13 46.4654 11.6137   3
   0  -5 -13 57.1732 13.6180   1
   0  -5  13 39.3981 11.1616   4
   0   5 -13 68.1353 13.8743   1
   0   5 -13 47.8144 9.20213   3
   0   5 -13 40.6368 12.6132   5
  -1  -5 -13 205.924 21.0960   3
  -1  -5 -13 233.102 22.7670   1
   1  -5  13 194.463 20.8034   4
  -1   5 -13 194.310 23.8527   1
  -1   5 -13 165.888 21.1466   5
  -2  -5 -13 211.051 21.2770   3
  -2  -5 -13 188.543 20.3627   1
  -2   5 -13 205.232 23.6087   1
  -2   5 -13 154.048 19.7907   5
  -3  -5 -13 62.9575 14.9439   3
  -3  -5 -13 71.3792 11.8071   1
  -3   5 -13 55.3963 14.1736   1
  -3   5 -13 42.9445 14.8355   5
  -4  -6  13 20.0840 13.5857   4
  -4  -6  13 33.7339 15.9494   2
  -4   6  13 12.4336 13.4527   5
  -4   6  13 18.3249 13.6619   1
  -4   6  13 -7.8600 13.8761   2
   3  -6 -13 63.2987 15.9368   3
  -3  -6  13 31.3601 11.9809   4
   3  -6 -13 75.3279 17.6220   1
  -3  -6  13 28.5873 14.6635   2
  -3   6  13 39.8135 15.3354   1
  -3   6  13 23.8265 14.6004   2
  -3   6  13 40.5949 12.6948   5
   2  -6 -13 124.655 20.7449   1
  -2  -6  13 109.593 17.7668   4
   2  -6 -13 103.211 17.8865   3
  -2  -6  13 119.023 20.3921   2
   2   6 -13 150.800 20.7473   1
  -2   6  13 110.761 19.7808   2
   1  -6 -13 214.036 22.9962   3
  -1  -6  13 162.488 21.7580   4
   1  -6 -13 231.083 25.7721   1
  -1  -6  13 231.982 22.8766   2
   1   6 -13 184.343 23.1069   5
   1   6 -13 262.467 26.3450   1
   0  -6 -13 79.3189 15.0543   1
   0  -6 -13 76.6473 14.6880   3
   0  -6  13 77.2093 13.7060   4
   0  -6  13 90.2232 12.6187   2
   0   6 -13 60.8592 13.7055   5
   0   6 -13 51.5280 13.9582   1
   0   6 -13 78.7834 12.1027   3
   1  -6  13 119.307 17.8697   4
  -1  -6 -13 99.4752 17.0005   3
  -1  -6 -13 131.453 19.3227   1
  -1   6 -13 141.898 21.8735   1
  -1   6 -13 116.499 17.5170   5
  -2  -6 -13 54.1942 12.3847   1
  -2  -6 -13 49.2715 13.2288   3
  -2   6 -13 28.9185 12.5248   5
  -2   6 -13 47.9088 15.2036   1
  -3  -6 -13 5.06327 11.0270   3
  -3  -6 -13 21.8023 8.77572   1
  -3   6 -13 -3.3447 12.5991   5
  -3   6 -13 12.5643 11.7465   1
  -3  -7  13 34.5073 14.1886   2
  -3  -7  13 19.0316 12.6350   4
   3  -7 -13 19.4416 13.6727   1
   3  -7 -13 16.6591 12.7044   3
  -3   7  13 15.9322 13.9577   1
  -3   7  13 17.1023 14.7060   2
  -2  -7  13 33.8377 13.5591   4
   2  -7 -13 24.4828 12.6775   3
  -2  -7  13 15.5644 11.9296   2
   2  -7 -13 14.7558 11.7575   1
  -2   7  13 28.3212 14.7527   1
  -1  -7  13 58.0272 12.9596   2
   1  -7 -13 72.9575 16.4086   1
   1  -7 -13 33.9359 13.0526   3
  -1  -7  13 53.4790 12.8053   4
   1   7 -13 90.1834 16.4450   5
  -1   7  13 109.310 19.0019   1
   1   7 -13 84.8182 16.4786   1
   0  -7 -13 24.5349 11.2246   3
   0  -7  13 22.2257 11.2146   4
   0  -7 -13 7.19455 11.1749   1
   0   7 -13 19.0339 11.9518   1
   0   7 -13 46.9584 13.0519   5
  -1  -7 -13 24.5383 11.7333   1
   1  -7  13 17.7105 11.2598   4
  -1  -7 -13 21.6686 11.9661   3
  -1   7 -13 41.8935 14.1322   5
  -1   7 -13 6.29361 12.8717   1
  -2  -7 -13 41.0627 12.1095   1
  -2  -7 -13 73.8995 15.2122   3
  -2   7 -13 82.1985 17.7915   1
  -2   7 -13 40.4752 14.1790   5
   2  -8 -13 73.8426 18.6478   1
  -2  -8  13 95.2448 17.6016   2
  -2  -8  13 81.4185 16.7540   4
   2  -8 -13 86.9743 19.1124   3
  -2   8  13 80.9845 18.1868   1
  -1  -8  13 35.7616 13.4005   4
   1  -8 -13 59.4456 16.4706   1
   1  -8 -13 63.6020 16.3311   3
   1   8 -13 81.4466 16.5831   5
   1   8 -13 75.6086 18.5686   1
  -1   8  13 55.7552 15.9401   1
   0  -8 -13 -1.3724 11.1025   1
   0  -8 -13 -5.4077 11.6607   3
   0  -8  13 -9.7001 10.2664   4
   0   8 -13 14.8551 11.9854   5
   0   8 -13 1.99206 13.0510   1
  -1  -8 -13 69.6792 17.0040   3
  -1  -8 -13 82.5370 17.5350   1
   1  -8  13 72.3899 14.6807   4
  -1   8 -13 75.4590 18.4705   1
  -1   8 -13 63.1005 16.8866   5
  -5   0  14 -3.5694 13.9734   2
  -4   0  14 40.6213 11.0297   4
  -4   0  14 26.1936 13.8103   2
   3   0 -14 11.3845 6.31803   3
  -3   0  14 9.37828 9.85238   2
   3   0 -14 17.8884 9.60479   1
  -3   0  14 8.40719 8.64979   4
   2   0 -14 308.815 24.4375   3
  -2   0  14 295.483 27.4981   2
   2   0 -14 319.357 28.9356   1
  -2   0  14 328.674 27.1669   4
  -1   0  14 461.180 36.3620   4
  -1   0  14 458.219 36.1892   2
   1   0 -14 495.737 38.1883   1
   1   0 -14 461.851 34.4726   3
   0   0 -14 144.896 17.6371   1
   0   0 -14 124.025 13.9983   5
   0   0  14 179.978 16.5052   2
   0   0 -14 159.456 15.6918   3
  -1   0 -14 188.068 18.9365   2
  -1   0 -14 188.769 18.8935   3
  -1   0 -14 170.540 15.8541   5
  -1   0 -14 187.578 19.8509   1
  -2   0 -14 142.001 17.8049   1
  -2   0 -14 153.515 18.6935   3
  -2   0 -14 151.637 15.0980   5
  -3   0 -14 138.851 20.6431   3
  -3   0 -14 149.473 17.6891   1
  -3   0 -14 164.489 16.8067   5
  -4   0 -14 22.1853 14.2446   5
  -4   0 -14 19.5605 12.2228   3
  -4   0 -14 20.4147 7.84890   1
  -5  -1  14 39.8885 15.4276   2
  -5  -1  14 45.5653 12.7013   4
  -5   1  14 73.3300 19.2458   2
  -4  -1  14 10.2403 9.28363   4
  -4  -1  14 21.5488 13.9843   2
  -4   1  14 32.0956 10.3685   4
  -4   1  14 31.2299 14.1631   2
   3  -1 -14 63.4361 13.4706   1
  -3  -1  14 49.7259 11.9106   4
   3  -1 -14 58.7608 10.8330   3
  -3  -1  14 67.7196 14.5561   2
  -3   1  14 44.5607 12.9496   2
   3   1 -14 85.4447 10.0090   3
  -3   1  14 66.5657 11.9304   4
   3   1 -14 70.3968 13.4978   1
   2  -1 -14 474.005 36.6364   3
  -2  -1  14 455.459 38.0178   4
  -2  -1  14 480.654 35.1370   3
   2  -1 -14 492.419 40.4785   1
  -2  -1  14 472.200 39.3439   2
   2   1 -14 521.163 35.2979   3
  -2   1  14 571.323 38.4274   4
  -2   1  14 458.303 39.2412   2
   2   1 -14 522.649 40.4112   1
  -1  -1  14 270.363 21.9462   3
  -1  -1  14 259.537 24.0436   2
   1  -1 -14 257.107 22.8969   3
   1  -1 -14 237.348 25.6092   1
  -1  -1  14 232.500 23.5054   4
   1   1 -14 313.120 22.0077   3
  -1   1  14 284.361 24.8048   2
   1   1 -14 302.436 26.2674   1
   0  -1  14 759.220 53.3145   2
   0  -1 -14 771.815 56.3038   1
   0  -1 -14 729.931 53.8325   3
   0  -1  14 691.712 54.6914   4
   0   1  14 795.818 54.5900   2
   0   1 -14 733.676 53.1344   5
   0   1 -14 749.809 56.0363   1
   0   1 -14 836.273 53.9294   3
  -1  -1 -14 214.211 16.6988   5
  -1  -1 -14 193.697 20.9492   1
  -1  -1 -14 222.982 19.8369   3
   1   1  14 185.902 17.0296   5
  -1   1 -14 196.352 18.3755   5
  -1   1 -14 170.546 19.4223   3
  -1   1 -14 209.801 17.6648   2
  -1   1 -14 211.303 21.3197   1
  -2  -1 -14 26.5141 10.0254   3
  -2  -1 -14 9.19578 6.45283   5
  -2  -1 -14 25.2045 8.71442   1
  -2   1 -14 69.1908 11.1051   5
  -2   1 -14 66.2799 11.9603   3
  -2   1 -14 71.1976 12.3432   1
  -3  -1 -14 26.3646 10.7807   3
  -3  -1 -14 18.3875 7.95443   5
  -3  -1 -14 30.1183 8.76655   1
  -3   1 -14 48.6032 12.9032   3
  -3   1 -14 18.2984 9.45805   5
  -3   1 -14 27.4821 9.56967   1
  -4  -1 -14 108.934 19.2316   3
  -4  -1 -14 108.026 13.3883   1
  -4   1 -14 108.622 15.3356   1
  -4   1 -14 126.116 20.2072   3
  -4   1 -14 95.9373 17.4046   5
  -5  -2  14 28.5813 18.4965   2
  -5  -2  14 28.7280 11.9344   4
  -5   2  14 16.3943 14.1383   2
  -4  -2  14 122.070 21.2565   2
  -4  -2  14 137.340 19.0066   4
  -4   2  14 156.304 21.7338   2
  -4   2  14 174.479 17.9335   4
   3  -2 -14 143.745 20.3101   1
   3  -2 -14 115.474 17.0322   3
  -3  -2  14 157.996 17.6006   4
  -3  -2  14 150.121 19.8388   2
   3   2 -14 147.703 19.1733   1
  -3   2  14 118.511 20.4164   2
   2  -2 -14 238.121 21.4079   3
   2  -2 -14 232.162 24.6140   1
  -2  -2  14 233.937 22.5763   4
  -2  -2  14 215.683 23.4501   2
   2   2 -14 251.712 24.5178   1
  -2   2  14 198.460 23.5205   2
   2   2 -14 233.070 17.8397   3
  -1  -2  14 739.016 52.1310   2
   1  -2 -14 668.992 53.6067   1
  -1  -2  14 704.060 52.1088   4
   1  -2 -14 737.175 51.5998   3
   1   2 -14 716.259 49.4104   3
   1   2 -14 747.221 54.5125   1
  -1   2  14 753.847 49.2094   5
  -1   2  14 643.523 52.3015   2
   0  -2  14 402.375 29.0155   2
   0  -2  14 360.462 31.2154   4
   0  -2 -14 364.863 30.3245   3
   0  -2 -14 404.647 32.7918   1
   0   2 -14 383.720 29.2693   3
   0   2 -14 323.704 29.1073   5
   0   2 -14 384.219 32.6743   1
   0   2  14 392.679 30.5880   2
   0   2 -14 410.458 29.7207   2
   1  -2  14 208.877 18.5089   2
  -1  -2 -14 207.937 22.5050   1
  -1  -2 -14 215.061 21.9033   3
  -1   2 -14 264.997 19.2938   2
   1   2  14 242.923 18.5885   5
  -1   2 -14 259.207 24.1432   1
  -1   2 -14 245.257 20.4168   5
  -1   2 -14 232.596 21.8469   3
  -2  -2 -14 207.810 21.4176   3
  -2  -2 -14 185.067 15.3510   5
  -2  -2 -14 188.178 19.4233   1
  -2   2 -14 178.713 19.9124   3
  -2   2 -14 183.996 18.6217   5
  -2   2 -14 174.051 20.9750   1
  -3  -2 -14 142.895 17.0445   1
  -3  -2 -14 141.026 20.4199   3
  -3   2 -14 171.954 22.0415   3
  -3   2 -14 160.180 19.3025   1
  -3   2 -14 156.634 18.2570   5
  -4  -2 -14 34.1079 12.7432   3
  -4  -2 -14 42.3093 7.91869   1
  -4   2 -14 52.4906 14.4298   5
  -4   2 -14 34.3439 10.4708   1
  -4   2 -14 56.4392 15.9865   3
  -4  -3  14 74.7648 18.0478   2
  -4  -3  14 113.996 17.0478   4
  -4   3  14 80.5668 17.0236   2
  -3  -3  14 9.37856 9.54000   4
  -3  -3  14 6.18768 11.2366   2
   3  -3 -14 5.19436 9.62472   1
   3  -3 -14 12.4082 9.60711   3
   3   3 -14 11.4944 9.13142   1
  -3   3  14 7.98525 12.2131   2
  -2  -3  14 361.364 31.1913   2
   2  -3 -14 362.646 32.4793   1
   2  -3 -14 347.016 29.3182   3
  -2  -3  14 322.100 29.8818   4
   2   3 -14 344.278 24.1752   3
   2   3 -14 392.221 32.4263   1
  -2   3  14 303.957 30.0111   2
   1  -3 -14 342.457 30.2534   3
  -1  -3  14 395.511 31.2011   2
   1  -3 -14 390.564 34.0089   1
  -1  -3  14 363.787 31.5061   4
  -1   3  14 336.659 31.2285   2
   1   3 -14 402.446 27.8907   3
  -1   3  14 387.427 27.3032   5
   1   3 -14 386.684 33.2136   1
   0  -3 -14 360.937 31.5765   1
   0  -3  14 361.572 27.3132   2
   0  -3  14 341.914 30.0356   4
   0  -3 -14 341.752 29.3724   3
   0   3  14 328.466 29.5202   2
   0   3 -14 340.402 28.9912   5
   0   3 -14 334.747 31.4290   1
   0   3 -14 378.004 27.9568   2
   0   3 -14 367.118 27.7101   3
   1  -3  14 46.6324 7.98106   2
  -1  -3 -14 58.8608 12.1165   3
  -1  -3 -14 69.1341 13.5918   1
  -1   3 -14 74.7039 13.9657   1
  -1   3 -14 83.1005 12.7985   3
  -1   3 -14 75.2769 12.2559   5
  -2  -3 -14 65.8278 12.3543   1
  -2  -3 -14 69.5824 13.7552   3
  -2   3 -14 87.0474 14.6773   1
  -2   3 -14 70.5542 13.0737   5
  -2   3 -14 78.4369 14.6652   3
  -3  -3 -14 59.6619 13.9926   3
  -3  -3 -14 52.1283 10.5185   1
  -3   3 -14 54.0776 12.1981   5
  -3   3 -14 44.5774 13.9199   3
  -3   3 -14 50.1426 12.1383   1
  -4  -3 -14 69.3556 17.8237   3
  -4   3 -14 36.3715 14.4847   5
  -4   3 -14 44.0792 11.9552   1
  -4  -4  14 54.4277 14.6874   4
  -4  -4  14 36.0326 15.5062   2
  -4   4  14 34.4372 14.7639   5
  -4   4  14 39.2882 14.5503   2
  -3  -4  14 133.805 19.5153   4
   3  -4 -14 140.116 19.6963   3
   3  -4 -14 134.731 21.6367   1
  -3  -4  14 144.798 20.3569   2
  -3   4  14 115.542 19.7347   2
  -3   4  14 152.554 20.3821   5
  -2  -4  14 126.102 19.2602   2
   2  -4 -14 159.614 20.6890   1
   2  -4 -14 150.159 18.8347   3
  -2  -4  14 134.629 17.0535   4
   2   4 -14 124.600 19.1326   1
  -2   4  14 124.225 18.8286   2
  -1  -4  14 162.927 18.9732   2
   1  -4 -14 148.595 20.9628   1
   1  -4 -14 165.466 19.2671   3
  -1  -4  14 127.905 18.7646   4
  -1   4  14 174.665 21.4142   2
   1   4 -14 180.969 14.5935   3
   1   4 -14 192.473 21.7555   1
   1   4 -14 150.717 18.3209   5
   0  -4  14 70.8477 11.7704   2
   0  -4 -14 97.9296 15.6566   1
   0  -4  14 89.3827 14.1446   4
   0  -4 -14 70.0023 13.5820   3
   0   4 -14 72.4037 11.5092   3
   0   4 -14 73.7088 14.6680   1
   0   4 -14 68.0169 13.5649   5
   1  -4  14 225.682 22.9804   4
  -1  -4 -14 196.702 22.9874   1
  -1  -4 -14 227.971 23.2261   3
  -1   4 -14 217.637 21.4187   5
  -1   4 -14 240.328 22.1062   3
  -1   4 -14 256.378 25.3760   1
  -2  -4 -14 184.990 20.6062   1
  -2  -4 -14 215.208 22.5936   3
  -2   4 -14 228.930 23.2005   3
  -2   4 -14 168.822 19.8742   5
  -2   4 -14 191.637 23.0748   1
  -3  -4 -14 52.8492 13.8004   3
  -3  -4 -14 48.4624 10.2034   1
  -3   4 -14 69.4136 14.7480   1
  -3   4 -14 66.7788 15.2305   3
  -3   4 -14 50.2678 14.5527   5
  -4  -5  14 70.5408 18.5021   2
  -4  -5  14 47.0136 15.0795   4
  -4   5  14 42.1895 17.3342   2
  -4   5  14 63.7678 16.8704   5
  -3  -5  14 73.5199 15.5478   4
  -3  -5  14 64.6980 16.5679   2
   3  -5 -14 52.0076 16.2892   1
   3  -5 -14 75.2695 15.8174   3
  -3   5  14 49.0175 14.8919   2
  -3   5  14 75.0687 15.7014   5
  -2  -5  14 87.3669 16.9468   4
   2  -5 -14 130.526 19.8008   3
  -2  -5  14 136.367 19.7166   2
   2  -5 -14 161.840 22.6686   1
  -2   5  14 218.480 22.2516   2
   2   5 -14 168.160 21.8296   1
  -2   5  14 144.749 17.5270   5
  -1  -5  14 81.0906 15.7958   4
   1  -5 -14 88.4146 16.2018   3
   1  -5 -14 71.2171 16.0264   1
  -1  -5  14 77.7318 14.1365   2
   1   5 -14 106.935 16.2200   5
   1   5 -14 119.198 11.1130   3
   1   5 -14 144.091 20.4403   1
  -1   5  14 76.0762 15.6838   2
   0  -5 -14 435.014 35.2977   3
   0  -5  14 409.141 32.0833   2
   0  -5  14 385.785 34.6282   4
   0  -5 -14 433.835 37.3065   1
   0   5 -14 437.321 34.6947   5
   0   5 -14 457.698 33.3062   3
   0   5 -14 425.181 37.9443   1
  -1  -5 -14 72.8177 14.3627   1
  -1  -5 -14 65.8160 13.3253   3
   1  -5  14 70.5267 13.5046   4
  -1   5 -14 79.0078 15.9083   1
  -1   5 -14 63.0494 14.2812   5
  -1   5 -14 96.6261 14.8561   3
  -2  -5 -14 92.3159 15.7692   1
  -2  -5 -14 117.269 17.7158   3
  -2   5 -14 91.9157 16.8755   1
  -2   5 -14 104.222 16.8052   3
  -2   5 -14 77.4000 16.1716   5
  -3  -5 -14 28.0347 9.08180   1
  -3  -5 -14 28.1413 11.2359   3
  -3   5 -14 32.9735 11.9412   1
  -3   5 -14 23.2143 12.2716   3
  -3   5 -14 10.0150 12.4560   5
   3  -6 -14 59.6320 16.1117   1
  -3  -6  14 65.3363 14.4437   4
  -3  -6  14 60.0199 16.8470   2
   3  -6 -14 41.4941 13.9165   3
  -3   6  14 89.8121 18.2639   2
   2  -6 -14 111.699 19.2509   1
  -2  -6  14 122.456 19.8754   2
   2  -6 -14 130.627 19.4691   3
  -2  -6  14 116.684 18.5259   4
   2   6 -14 101.836 18.3357   1
  -2   6  14 99.8923 18.3681   2
  -1  -6  14 166.315 22.1294   4
   1  -6 -14 219.176 24.2942   3
   1  -6 -14 189.735 25.3058   1
  -1  -6  14 177.057 21.3654   2
   1   6 -14 219.558 23.6183   5
   1   6 -14 241.316 25.8935   1
   0  -6 -14 50.1084 13.9552   1
   0  -6  14 47.7540 13.0338   4
   0  -6 -14 64.5216 14.0377   3
   0   6 -14 77.8926 15.0891   5
   0   6 -14 39.6148 9.52773   3
   0   6 -14 28.8426 13.1431   1
  -1  -6 -14 343.049 32.4761   1
   1  -6  14 320.784 30.1756   4
  -1  -6 -14 370.692 32.1702   3
  -1   6 -14 302.851 30.6077   5
  -1   6 -14 387.119 34.8965   1
  -2  -6 -14 57.6939 13.1317   1
  -2  -6 -14 52.1750 14.3714   3
  -2   6 -14 75.4102 16.1067   1
  -2   6 -14 31.8558 13.4285   5
  -3  -6 -14 54.5467 11.6226   1
  -3  -6 -14 45.2237 14.2245   3
   3  -7 -14 91.0139 19.8362   1
  -3  -7  14 78.9801 19.3616   2
  -3  -7  14 64.5512 15.4567   4
   3  -7 -14 75.2381 18.7445   3
  -3   7  14 112.103 21.2267   1
  -3   7  14 45.6108 16.1330   2
   2  -7 -14 83.3535 18.9352   3
   2  -7 -14 61.5732 16.5232   1
  -2  -7  14 63.9653 15.2304   4
  -2  -7  14 94.1667 17.1544   2
  -2   7  14 50.4017 15.7290   1
   1  -7 -14 46.5600 13.7978   3
  -1  -7  14 32.9524 11.4708   2
  -1  -7  14 24.1612 11.8266   4
   1  -7 -14 28.1369 13.9108   1
  -1   7  14 60.8605 15.0523   1
   1   7 -14 30.7717 13.9015   5
   1   7 -14 50.2610 14.8685   1
   0  -7 -14 244.051 28.2912   3
   0  -7 -14 298.095 30.3869   1
   0  -7  14 249.532 26.3495   4
   0   7 -14 321.630 31.8064   1
   0   7 -14 251.073 26.5155   5
   1  -7  14 13.7180 11.0033   4
  -1  -7 -14 16.8621 11.4099   1
  -1  -7 -14 10.8528 10.5894   3
  -1   7 -14 4.55262 12.2902   1
  -1   7 -14 24.6925 12.5203   5
  -2  -7 -14 80.3804 15.5398   3
  -2  -7 -14 95.6413 16.5510   1
  -2   7 -14 39.0508 14.8691   5
  -2   7 -14 69.1772 17.3108   1
   2  -8 -14 65.4455 17.7553   1
  -2  -8  14 52.1345 15.5580   4
  -2  -8  14 39.7988 14.1711   2
   2  -8 -14 27.3023 21.7939   3
  -2   8  14 35.8875 17.2131   1
   1  -8 -14 112.142 21.6578   1
   1  -8 -14 111.318 19.1089   3
  -1  -8  14 49.7893 14.5735   4
   1   8 -14 110.630 19.8683   1
  -1   8  14 84.6526 19.5417   1
   1   8 -14 108.167 18.6344   5
   0  -8 -14 22.5904 12.6553   3
   0  -8  14 -1.2879 10.8291   4
   0  -8 -14 12.5376 13.0220   1
   0   8 -14 30.9346 13.9612   5
   0   8 -14 15.3892 12.1773   1
   1  -8  14 74.4630 15.7106   4
  -1  -8 -14 79.3671 16.6362   3
  -1  -8 -14 98.2680 22.6613   1
  -1   8 -14 97.3776 20.4749   1
  -1   8 -14 92.1687 23.0028   5
  -5   0  15 53.7167 23.9273   2
  -4   0  15 94.6763 18.8903   2
  -4   0  15 89.2278 14.5495   4
  -3   0  15 343.565 30.5531   4
   3   0 -15 366.297 28.6969   3
   3   0 -15 388.818 34.1406   1
   2   0 -15 270.612 22.5232   3
   2   0 -15 305.953 27.5292   1
  -2   0  15 270.323 25.0158   4
  -2   0  15 249.520 26.1763   2
  -1   0  15 363.961 29.8743   4
  -1   0  15 353.136 29.0980   2
   1   0 -15 346.031 27.1180   3
   1   0 -15 322.512 30.6002   1
   0   0  15 496.836 37.5621   2
   0   0 -15 512.358 40.1130   1
   0   0 -15 477.893 36.9825   3
  -1   0 -15 86.1149 11.7706   5
  -1   0 -15 95.5931 14.3873   3
  -1   0 -15 92.1443 15.5280   1
  -2   0 -15 512.924 41.2768   3
  -2   0 -15 520.508 40.9067   1
  -2   0 -15 514.524 37.3251   5
  -3   0 -15 81.9116 15.7788   3
  -3   0 -15 70.1731 11.8408   5
  -3   0 -15 69.8484 12.6362   1
  -4   0 -15 83.4044 13.8123   1
  -5  -1  15 35.1770 12.0746   4
  -5   1  15 30.7212 26.4952   2
  -4  -1  15 16.8429 10.5498   4
  -4  -1  15 30.7278 13.8934   2
  -4   1  15 20.7165 12.7182   2
  -4   1  15 7.87829 9.41661   4
   3  -1 -15 206.687 24.0004   1
  -3  -1  15 211.686 22.1115   4
  -3  -1  15 211.642 24.9692   2
   3  -1 -15 196.499 20.1581   3
   3   1 -15 215.107 18.4331   3
  -3   1  15 214.133 23.6050   2
  -3   1  15 201.476 21.8331   4
   3   1 -15 223.158 24.1070   1
   2  -1 -15 164.422 21.5907   1
  -2  -1  15 161.985 18.6277   4
   2  -1 -15 178.942 17.9630   3
  -2  -1  15 205.137 16.2679   3
  -2  -1  15 159.623 20.6878   2
  -2   1  15 174.562 21.1240   2
   2   1 -15 154.248 20.6314   1
   2   1 -15 179.158 15.9175   3
  -2   1  15 172.290 19.8912   4
   1  -1 -15 247.651 22.1815   3
   1  -1 -15 268.480 25.9487   1
  -1  -1  15 248.578 24.1033   4
  -1  -1  15 249.076 23.5281   2
  -1   1  15 250.251 23.5056   2
   1   1 -15 255.699 21.1296   3
   1   1 -15 278.167 25.9582   1
   0  -1  15 115.319 13.8347   2
   0  -1 -15 89.0140 13.3078   3
   0  -1 -15 119.852 16.3247   1
   0   1 -15 83.4333 12.8227   3
   0   1 -15 73.6427 14.0294   1
   0   1 -15 81.3378 12.6061   5
  -1  -1 -15 778.725 53.1215   5
  -1  -1 -15 842.546 58.1170   1
  -1  -1 -15 805.730 56.4026   3
  -1   1 -15 800.804 56.0627   3
  -1   1 -15 743.787 54.0448   5
   1   1  15 671.311 53.2026   5
  -1   1 -15 801.579 57.7275   1
  -1   1 -15 821.028 54.6321   2
  -2  -1 -15 163.421 19.3901   1
  -2  -1 -15 139.902 15.3079   5
  -2  -1 -15 150.937 18.8242   3
  -2   1 -15 190.025 21.0778   3
  -2   1 -15 204.057 20.7721   1
  -2   1 -15 195.340 17.3174   5
  -3  -1 -15 178.401 19.7597   1
  -3  -1 -15 208.064 23.2665   3
  -3   1 -15 176.438 19.7178   5
  -3   1 -15 185.076 21.7222   3
  -3   1 -15 177.503 20.9070   1
  -4  -1 -15 34.4964 8.69394   1
  -4   1 -15 28.3277 9.82674   1
  -4   1 -15 -2.9985 11.8780   5
  -4  -2  15 114.165 17.0081   4
  -4  -2  15 93.7766 18.6466   2
  -4   2  15 55.6323 17.9156   2
   3  -2 -15 119.856 19.9528   1
  -3  -2  15 115.945 20.0387   2
   3  -2 -15 103.936 15.4426   3
  -3  -2  15 107.711 17.1505   4
   3   2 -15 129.761 18.8727   1
  -3   2  15 120.823 18.7472   2
  -2  -2  15 235.117 24.2336   4
   2  -2 -15 239.283 25.8828   1
  -2  -2  15 208.391 24.4705   2
   2  -2 -15 236.243 22.6796   3
   2   2 -15 277.127 26.4214   1
   2   2 -15 264.418 19.3179   3
  -2   2  15 247.200 24.6850   2
   1  -2 -15 222.429 22.9163   1
  -1  -2  15 204.598 20.8947   2
  -1  -2  15 212.867 21.7389   4
   1  -2 -15 216.993 20.0709   3
  -1   2  15 205.793 17.8939   5
   1   2 -15 192.301 17.2315   3
  -1   2  15 177.396 20.6410   2
   1   2 -15 196.723 22.5231   1
   0  -2  15 566.328 38.0496   2
   0  -2  15 468.805 39.9577   4
   0  -2 -15 518.060 38.9060   3
   0  -2 -15 563.370 41.8910   1
   0   2 -15 498.786 41.5366   1
   0   2  15 480.461 39.4188   2
   0   2 -15 476.545 38.3590   5
   0   2 -15 517.617 38.0898   3
  -1  -2 -15 29.1487 10.4531   3
  -1  -2 -15 41.5674 11.3148   1
   1  -2  15 34.6610 7.54014   2
  -1   2 -15 39.4176 10.3495   5
  -1   2 -15 56.5292 11.3717   3
  -1   2 -15 59.2392 12.5614   1
  -2  -2 -15 274.612 24.9571   3
  -2  -2 -15 231.920 23.2278   1
  -2   2 -15 245.172 24.7801   1
  -2   2 -15 239.963 24.5527   3
  -2   2 -15 216.926 21.6449   5
  -3  -2 -15 115.366 17.6276   3
  -3  -2 -15 121.911 15.9278   1
  -3   2 -15 97.3787 16.6941   5
  -3   2 -15 100.277 17.8435   3
  -3   2 -15 116.424 17.7612   1
  -4  -3  15 17.8045 11.8939   4
  -4  -3  15 30.9365 14.6896   2
  -4   3  15 6.77587 13.3922   2
   3  -3 -15 147.886 21.6374   1
  -3  -3  15 134.896 18.9921   4
  -3  -3  15 114.446 19.5588   2
   3  -3 -15 115.405 18.8584   3
  -3   3  15 128.012 19.9119   2
   3   3 -15 171.431 20.9640   1
   2  -3 -15 128.809 20.5428   1
  -2  -3  15 143.556 20.0131   2
   2  -3 -15 157.826 18.5843   3
  -2  -3  15 142.032 19.2261   4
  -2   3  15 181.131 20.5109   2
   2   3 -15 184.930 21.6502   1
   1  -3 -15 95.3201 14.0007   3
  -1  -3  15 76.0535 12.7753   4
  -1  -3  15 53.6175 11.4936   2
   1  -3 -15 90.4727 15.0673   1
  -1   3  15 36.8521 12.8511   2
  -1   3  15 58.2130 8.51473   5
   1   3 -15 37.8028 7.81636   3
   1   3 -15 40.8272 12.1874   1
   0  -3 -15 116.126 18.4231   1
   0  -3  15 129.746 17.8549   4
   0  -3  15 118.893 14.5789   2
   0  -3 -15 115.907 16.7029   3
   0   3 -15 140.112 15.1961   2
   0   3  15 136.828 18.6247   2
   0   3 -15 162.822 20.0269   1
   0   3 -15 138.206 17.1141   5
   0   3 -15 150.798 14.9310   3
   1  -3  15 647.193 47.0911   2
  -1  -3 -15 748.494 52.2968   1
  -1  -3 -15 750.082 50.5881   3
  -1   3 -15 617.065 48.5635   5
  -1   3 -15 656.160 51.8690   1
  -1   3 -15 647.339 49.4753   3
  -2  -3 -15 151.137 18.7988   1
  -2  -3 -15 181.632 20.0645   3
  -2   3 -15 147.160 19.4710   3
  -2   3 -15 128.230 17.8819   5
  -2   3 -15 127.624 19.5984   1
  -3  -3 -15 115.339 18.9810   3
  -3  -3 -15 107.271 15.3579   1
  -3   3 -15 120.573 18.5315   5
  -3   3 -15 139.656 20.6164   3
  -3   3 -15 121.835 18.9371   1
  -4  -4  15 38.8031 13.8349   4
  -4  -4  15 38.0320 15.7805   2
  -4   4  15 4.98465 13.1027   2
  -4   4  15 13.4551 14.0752   5
   3  -4 -15 206.214 25.0275   1
  -3  -4  15 197.991 22.0554   4
   3  -4 -15 188.068 22.0032   3
  -3  -4  15 190.247 23.2237   2
  -3   4  15 150.635 21.2926   5
  -3   4  15 108.046 20.9737   2
  -2  -4  15 88.4770 16.0504   2
   2  -4 -15 109.004 16.6452   3
   2  -4 -15 101.264 17.7271   1
  -2  -4  15 71.5404 14.7876   4
  -2   4  15 67.9897 15.1964   2
   2   4 -15 127.477 19.0953   1
   1  -4 -15 181.613 21.0057   3
   1  -4 -15 178.536 23.2399   1
  -1  -4  15 194.055 20.7457   2
  -1  -4  15 177.612 21.1492   4
   1   4 -15 199.392 16.2862   3
   1   4 -15 228.229 23.9103   1
   1   4 -15 167.719 20.0607   5
  -1   4  15 191.008 22.8272   2
   0  -4 -15 104.147 17.3805   1
   0  -4  15 96.0611 12.8676   2
   0  -4  15 94.2926 15.3565   4
   0  -4 -15 99.9557 15.6552   3
   0   4 -15 108.657 17.7998   1
   0   4 -15 99.6992 13.1085   3
   0   4 -15 85.5798 14.3434   5
  -1  -4 -15 44.0117 12.3603   1
  -1  -4 -15 89.1093 15.0502   3
   1  -4  15 51.8520 13.7818   4
  -1   4 -15 108.417 16.2108   5
  -1   4 -15 115.449 18.4536   1
  -1   4 -15 83.9931 13.9003   3
  -2  -4 -15 127.694 17.7728   1
  -2  -4 -15 120.052 19.0080   3
  -2   4 -15 149.121 20.8252   1
  -2   4 -15 107.333 17.8839   3
  -2   4 -15 128.090 18.7844   5
  -3  -4 -15 51.5397 13.4044   3
  -3  -4 -15 46.7807 10.7392   1
  -3   4 -15 72.2628 15.5509   1
  -3   4 -15 54.3493 13.6043   5
  -3   4 -15 59.5015 15.6708   3
  -4  -5  15 88.1861 20.0979   2
  -4  -5  15 93.2094 17.8613   4
  -4   5  15 48.9454 17.1507   2
  -4   5  15 78.8990 18.0415   5
   3  -5 -15 41.8461 14.6969   1
  -3  -5  15 34.3691 14.8871   2
   3  -5 -15 44.9941 14.2420   3
  -3  -5  15 31.4099 12.4454   4
  -3   5  15 23.6071 12.4435   5
  -3   5  15 21.4136 15.1336   2
  -2  -5  15 158.212 21.3127   2
  -2  -5  15 155.776 20.6104   4
   2  -5 -15 178.768 23.8939   1
   2  -5 -15 160.308 21.5306   3
   2   5 -15 157.383 22.4358   1
  -2   5  15 134.940 22.7684   2
  -1  -5  15 85.1671 14.5511   2
  -1  -5  15 89.3877 15.2815   4
   1  -5 -15 112.959 17.0035   3
   1  -5 -15 125.813 19.6009   1
  -1   5  15 76.2607 17.2761   2
   1   5 -15 62.1540 15.4156   1
   1   5 -15 49.6158 13.2627   5
   0  -5 -15 162.636 21.4631   3
   0  -5 -15 185.909 23.3165   1
   0  -5  15 185.529 21.8165   4
   0  -5  15 157.590 18.8659   2
   0   5 -15 202.288 18.6977   3
   0   5 -15 206.151 22.2743   5
   0   5 -15 212.219 24.8411   1
  -1  -5 -15 239.442 23.6671   3
  -1  -5 -15 195.184 23.0720   1
   1  -5  15 190.056 22.3820   4
  -1   5 -15 189.407 21.0311   3
  -1   5 -15 176.612 23.9510   1
  -1   5 -15 166.098 21.8957   5
  -2  -5 -15 121.166 17.2217   3
  -2  -5 -15 89.1883 14.8765   1
  -2   5 -15 76.0479 16.3449   1
  -2   5 -15 88.1354 16.2040   3
  -2   5 -15 68.4799 15.8665   5
  -3  -5 -15 65.3503 12.1576   1
  -3  -5 -15 57.6657 15.8231   3
  -3   5 -15 74.6363 17.3014   1
  -3   5 -15 61.3149 16.6718   5
  -3   5 -15 95.9076 18.8564   3
  -3  -6  15 102.478 18.5218   4
   3  -6 -15 111.982 20.2933   1
  -3  -6  15 120.995 20.4313   2
   3  -6 -15 116.736 20.3955   3
  -3   6  15 55.2255 18.7492   2
   2  -6 -15 70.3505 16.1384   1
  -2  -6  15 35.6875 13.2697   4
   2  -6 -15 38.5108 13.5021   3
  -2  -6  15 68.4563 15.6747   2
  -2   6  15 41.2673 14.9081   2
   2   6 -15 67.5781 16.2606   1
  -1  -6  15 194.463 22.4276   2
   1  -6 -15 193.674 24.7148   3
   1  -6 -15 253.781 27.2608   1
  -1  -6  15 182.812 23.2647   4
   1   6 -15 217.278 26.6615   1
   1   6 -15 213.256 24.2077   5
   0  -6 -15 95.0479 17.7410   1
   0  -6 -15 70.1517 15.5328   3
   0  -6  15 36.4114 13.0410   4
   0   6 -15 95.8841 18.8224   1
   0   6 -15 78.8827 15.1967   5
   0   6 -15 105.456 13.8730   3
  -1  -6 -15 34.3224 13.0358   3
  -1  -6 -15 6.59280 9.73274   1
   1  -6  15 47.6325 12.7280   4
  -1   6 -15 24.7380 10.6906   3
  -1   6 -15 40.8871 14.0541   1
  -1   6 -15 33.9337 14.0797   5
  -2  -6 -15 49.0141 12.5949   1
  -2  -6 -15 39.4812 13.7858   3
  -2   6 -15 31.9396 13.2337   3
  -2   6 -15 27.5896 13.2395   5
  -2   6 -15 51.8425 15.1644   1
  -2  -7  15 30.9839 14.6002   2
   2  -7 -15 61.9991 17.2137   3
   2  -7 -15 67.9973 17.4608   1
  -2  -7  15 38.9320 13.9224   4
  -2   7  15 52.0542 16.2763   1
  -1  -7  15 11.2499 11.6775   4
   1  -7 -15 5.09194 12.8425   3
   1  -7 -15 23.7105 13.9180   1
   1   7 -15 9.70608 12.5531   5
   1   7 -15 23.9891 12.7073   1
  -1   7  15 15.2834 12.3531   1
   0  -7 -15 55.4655 14.9873   3
   0  -7  15 69.2742 15.0417   4
   0  -7 -15 70.3411 16.0879   1
   0   7 -15 82.7889 16.9600   5
   0   7 -15 61.2558 16.8601   1
  -1  -7 -15 60.0644 16.3464   3
   1  -7  15 48.7860 13.9597   4
  -1  -7 -15 50.7446 14.7371   1
  -1   7 -15 40.1960 14.5154   1
  -1   7 -15 58.2040 15.8419   5
  -1   7 -15 41.1171 12.8069   3
   1  -8 -15 36.8704 20.2460   3
   1  -8 -15 58.6666 17.3958   1
  -1  -8  15 39.2947 14.8323   4
   1   8 -15 58.3684 18.1246   1
   1   8 -15 73.6849 17.2250   5
   0  -8  15 72.4651 15.4906   4
   0  -8 -15 68.1068 18.8622   1
   0  -8 -15 70.5844 20.1842   3
   0   8 -15 89.5986 19.5888   1
   0   8 -15 86.3611 24.7877   5
  -4   0  16 151.536 20.0428   4
  -4   0  16 158.857 24.5476   2
   3   0 -16 81.9823 15.8357   1
  -3   0  16 140.238 17.2675   4
  -3   0  16 78.8493 16.5728   2
   3   0 -16 80.8550 12.6863   3
  -2   0  16 295.000 28.3647   4
   2   0 -16 312.696 25.6663   3
  -2   0  16 328.138 29.9659   2
   2   0 -16 335.835 30.7843   1
   1   0 -16 127.333 18.6524   1
   1   0 -16 102.221 13.3455   3
  -1   0  16 119.304 16.5179   2
   0   0  16 756.271 54.0500   2
   0   0 -16 745.134 56.8702   1
   0   0 -16 753.659 53.9000   3
  -1   0 -16 224.555 19.2392   5
  -1   0 -16 230.355 23.5569   1
  -1   0 -16 205.475 21.7858   3
  -2   0 -16 86.9487 15.4775   1
  -2   0 -16 89.8549 15.9926   3
  -2   0 -16 92.5025 12.8605   5
  -3   0 -16 54.7404 11.8443   5
  -3   0 -16 52.3138 12.1023   1
  -3   0 -16 61.5526 15.0131   3
  -4  -1  16 4.16874 10.7659   4
  -4  -1  16 -4.6420 11.1112   2
  -4   1  16 7.14613 13.7846   2
  -4   1  16 9.38323 9.90771   4
   3  -1 -16 229.640 25.9168   1
  -3  -1  16 231.063 23.8215   4
  -3  -1  16 219.812 24.8288   2
   3  -1 -16 188.543 20.9027   3
   3   1 -16 242.278 25.4313   1
  -3   1  16 210.229 26.0494   2
  -3   1  16 250.235 23.6799   4
  -2  -1  16 47.7837 11.9911   2
   2  -1 -16 43.5188 12.8522   1
   2  -1 -16 68.1284 11.1688   3
  -2  -1  16 44.9885 12.3386   4
   2   1 -16 27.4740 7.57817   3
   2   1 -16 18.8674 10.3002   1
  -2   1  16 18.9029 11.5832   2
   1  -1 -16 635.995 47.8004   3
   1  -1 -16 673.435 51.5781   1
  -1  -1  16 602.738 49.3275   4
  -1  -1  16 654.210 48.7480   2
   1   1 -16 698.908 47.0000   3
   1   1 -16 669.642 51.5635   1
  -1   1  16 648.230 49.4020   2
   0  -1 -16 24.4312 10.0010   1
   0  -1  16 8.63283 8.59944   2
   0  -1 -16 12.9419 8.33809   3
   0   1  16 31.9756 10.1712   2
   0   1 -16 15.6422 7.88251   5
   0   1 -16 23.0212 7.92269   3
   0   1 -16 23.5677 10.2376   1
  -1  -1 -16 361.353 30.9879   1
  -1  -1 -16 318.734 28.2290   3
  -1  -1 -16 317.161 25.4068   5
  -1   1 -16 339.012 28.7382   3
  -1   1 -16 355.805 31.1057   1
  -1   1 -16 341.549 26.9883   5
  -2  -1 -16 337.698 26.0317   5
  -2  -1 -16 342.497 30.6779   3
  -2  -1 -16 332.965 30.3797   1
  -2   1 -16 320.774 27.6080   5
  -2   1 -16 345.749 30.7680   3
  -2   1 -16 365.895 31.6919   1
  -3  -1 -16 143.047 20.3993   3
  -3  -1 -16 115.297 16.8729   1
  -3   1 -16 115.161 16.3250   5
  -3   1 -16 121.998 18.8025   3
  -3   1 -16 137.310 19.0780   1
  -4  -2  16 146.798 20.2787   4
  -4  -2  16 137.741 24.3808   2
  -4   2  16 131.490 21.8076   2
  -3  -2  16 25.1423 12.4187   2
   3  -2 -16 9.82967 9.26222   3
  -3  -2  16 17.6303 10.9207   4
   3  -2 -16 11.9704 10.5389   1
   3   2 -16 16.8723 10.4995   1
  -3   2  16 3.90973 11.8456   2
  -2  -2  16 328.020 29.8853   2
   2  -2 -16 341.195 27.8708   3
  -2  -2  16 310.813 29.0549   4
   2  -2 -16 318.762 31.1189   1
   2   2 -16 316.522 24.0123   3
   2   2 -16 323.373 31.1602   1
  -2   2  16 289.283 29.8737   2
  -1  -2  16 38.1577 10.3042   2
   1  -2 -16 18.2703 8.67873   3
   1  -2 -16 22.0198 10.0083   1
  -1  -2  16 15.7087 9.56007   4
   1   2 -16 15.7940 9.68446   1
   1   2 -16 21.1908 7.01723   3
  -1   2  16 15.3131 10.5595   2
   0  -2 -16 853.945 60.0001   3
   0  -2 -16 836.746 62.3074   1
   0  -2  16 885.549 58.5370   2
   0  -2  16 861.442 61.2159   4
   0   2 -16 856.860 62.7205   1
   0   2 -16 767.856 58.8338   5
   0   2  16 763.596 59.7497   2
   0   2 -16 844.778 58.6891   3
  -1  -2 -16 51.7368 12.3942   3
  -1  -2 -16 42.3419 11.3380   1
  -1   2 -16 59.6111 11.5466   5
  -1   2 -16 49.3812 11.2426   3
  -1   2 -16 58.4547 13.5148   1
  -2  -2 -16 166.014 22.0082   1
  -2  -2 -16 215.521 22.7389   3
  -2   2 -16 253.168 25.0600   1
  -2   2 -16 246.886 23.4812   3
  -2   2 -16 236.460 21.5758   5
  -3  -2 -16 78.0980 13.5573   1
  -3  -2 -16 83.7886 16.7103   3
  -3   2 -16 73.0541 14.3313   5
  -3   2 -16 100.542 17.1275   3
  -3   2 -16 86.6382 15.2012   1
  -4  -3  16 28.4914 15.0559   2
  -4  -3  16 10.4824 11.7787   4
  -4   3  16 19.5786 15.2631   2
   3  -3 -16 197.525 24.8333   1
  -3  -3  16 159.676 24.3083   2
   3  -3 -16 190.451 21.6819   3
  -3  -3  16 195.765 23.0131   4
  -3   3  16 169.890 22.9626   2
   3   3 -16 212.685 25.2580   1
   2  -3 -16 38.3853 11.0196   3
  -2  -3  16 31.8090 12.2684   2
  -2  -3  16 28.2618 10.7100   4
   2  -3 -16 42.6933 13.4143   1
  -2   3  16 21.2332 11.8931   2
   2   3 -16 27.7317 11.8479   1
   1  -3 -16 940.540 67.3401   3
  -1  -3  16 877.810 67.5128   4
   1  -3 -16 960.951 70.5683   1
  -1  -3  16 948.694 66.9008   2
   1   3 -16 921.996 64.0585   3
   1   3 -16 1043.20 70.9672   1
  -1   3  16 906.013 68.4699   2
   0  -3 -16 33.0363 11.3034   1
   0  -3  16 48.1071 9.22648   2
   0  -3 -16 55.9465 12.0964   3
   0  -3  16 17.7499 10.0785   4
   0   3 -16 56.5583 13.5345   1
   0   3 -16 61.9218 11.7811   5
   0   3  16 42.8208 12.8913   2
   0   3 -16 43.7808 9.78108   3
  -1  -3 -16 254.484 22.8346   3
  -1  -3 -16 227.088 24.5312   1
  -1   3 -16 195.181 21.4053   3
  -1   3 -16 216.968 22.0364   5
  -1   3 -16 213.734 24.8228   1
  -2  -3 -16 101.581 17.2899   1
  -2  -3 -16 123.973 18.8224   3
  -2   3 -16 127.752 17.5022   3
  -2   3 -16 121.773 19.3623   1
  -2   3 -16 110.879 17.2353   5
  -3  -3 -16 134.634 20.5963   3
  -3  -3 -16 113.985 16.4221   1
  -3   3 -16 144.069 20.0463   1
  -3   3 -16 151.504 21.6513   3
  -3   3 -16 93.6819 16.7597   5
  -4  -4  16 86.1652 16.6809   4
  -4  -4  16 71.8988 18.8535   2
  -4   4  16 62.3162 17.0657   5
  -4   4  16 27.2153 15.1436   2
  -3  -4  16 20.2064 12.8303   2
  -3  -4  16 11.6956 12.1723   4
   3  -4 -16 18.3147 11.9894   3
   3  -4 -16 10.6799 12.6291   1
  -3   4  16 1.84646 13.8106   2
  -3   4  16 41.6173 13.4601   5
  -2  -4  16 300.099 28.4678   2
   2  -4 -16 284.120 27.7613   3
   2  -4 -16 329.926 31.2592   1
  -2  -4  16 254.442 27.3165   4
  -2   4  16 238.139 29.1978   2
   2   4 -16 297.519 29.9932   1
   1  -4 -16 61.6166 14.1622   1
   1  -4 -16 33.5982 12.2573   3
  -1  -4  16 46.3267 11.2794   2
  -1  -4  16 48.3434 12.9215   4
   1   4 -16 63.3036 9.01517   3
  -1   4  16 33.3266 12.9072   2
   1   4 -16 75.6311 15.1999   1
   0  -4  16 315.564 23.7430   2
   0  -4  16 267.970 27.1446   4
   0  -4 -16 304.980 27.2462   3
   0  -4 -16 296.079 28.7596   1
   0   4 -16 281.583 29.2480   1
   0   4 -16 234.660 24.9860   5
   0   4 -16 244.426 23.4433   3
  -1  -4 -16 122.132 18.8944   1
  -1  -4 -16 140.988 19.2408   3
   1  -4  16 123.942 19.2018   4
  -1   4 -16 133.541 17.2730   3
  -1   4 -16 137.171 20.9415   1
  -1   4 -16 143.125 18.8838   5
  -2  -4 -16 122.725 17.7999   1
  -2  -4 -16 97.7475 16.9669   3
  -2   4 -16 120.684 17.2657   5
  -2   4 -16 94.2021 17.7763   1
  -2   4 -16 164.155 19.8917   3
  -3  -4 -16 8.12682 7.88576   1
  -3  -4 -16 13.5028 11.0203   3
  -3   4 -16 8.96667 10.2307   1
  -3   4 -16 5.76601 11.7004   3
  -3   4 -16 -3.5435 12.8476   5
  -3  -5  16 65.7182 15.3892   4
   3  -5 -16 64.0387 15.4359   3
   3  -5 -16 86.5287 18.1341   1
  -3  -5  16 74.7967 18.0407   2
  -3   5  16 24.6171 16.6775   2
  -2  -5  16 56.0338 13.4639   4
   2  -5 -16 48.9199 14.8032   1
  -2  -5  16 28.2552 12.6427   2
   2  -5 -16 64.5050 15.0822   3
  -2   5  16 24.3778 14.0119   2
   2   5 -16 61.4099 15.4481   1
   1  -5 -16 169.060 21.8682   3
  -1  -5  16 164.525 19.9866   2
  -1  -5  16 159.030 20.2206   4
   1  -5 -16 171.879 24.0290   1
   1   5 -16 214.587 25.0617   1
   1   5 -16 174.471 20.6680   5
  -1   5  16 162.493 22.2524   2
   0  -5 -16 165.130 21.3610   3
   0  -5  16 150.509 20.8842   4
   0  -5 -16 157.233 22.3425   1
   0   5 -16 188.746 24.3745   1
   0   5 -16 168.352 20.0102   5
   0   5 -16 168.964 17.3877   3
   1  -5  16 34.6315 13.1375   4
  -1  -5 -16 39.9590 12.4790   1
  -1  -5 -16 25.2265 13.2175   3
  -1   5 -16 61.2511 12.8782   3
  -1   5 -16 49.5928 14.1441   5
  -1   5 -16 55.1143 14.7022   1
  -2  -5 -16 62.9410 15.7554   3
  -2  -5 -16 61.6849 13.0678   1
  -2   5 -16 66.8193 15.4437   5
  -2   5 -16 75.8156 16.9420   1
  -2   5 -16 96.7434 16.0405   3
   3  -6 -16 2.22973 12.1361   3
  -3  -6  16 15.8951 13.2262   4
   3  -6 -16 34.5924 14.3658   1
  -3  -6  16 20.7142 13.4556   2
  -3   6  16 -4.2938 13.1365   2
  -2  -6  16 52.0269 14.3531   2
  -2  -6  16 31.9115 13.4135   4
   2  -6 -16 39.3656 14.3981   3
   2  -6 -16 51.0789 15.0272   1
  -2   6  16 42.3931 17.2931   2
   2   6 -16 21.9747 13.9148   1
   1  -6 -16 42.4031 14.9835   1
  -1  -6  16 45.6316 12.3275   2
  -1  -6  16 31.7011 12.8219   4
   1  -6 -16 54.1060 14.3842   3
   1   6 -16 51.0806 15.4073   1
   1   6 -16 47.8693 14.2247   5
   0  -6 -16 60.9579 15.8792   1
   0  -6  16 89.2377 16.2613   4
   0  -6 -16 69.2473 14.5471   3
   0   6 -16 58.1156 15.1920   5
   0   6 -16 61.0415 15.7716   1
   1  -6  16 44.0739 14.1474   4
  -1  -6 -16 55.1404 14.3733   1
  -1  -6 -16 48.7927 15.0245   3
  -1   6 -16 72.8960 14.0344   3
  -1   6 -16 53.7445 15.2043   1
  -1   6 -16 74.3318 16.2269   5
  -2  -6 -16 19.1439 11.0502   1
  -2  -6 -16 23.7794 13.1354   3
  -2   6 -16 36.6752 13.0700   3
  -2   6 -16 41.0938 14.4722   1
  -2   6 -16 21.6679 13.0551   5
   2  -7 -16 39.0401 16.1308   1
  -2  -7  16 19.1110 12.0533   4
   2  -7 -16 15.9156 13.7459   3
  -2  -7  16 27.2914 13.1310   2
  -2   7  16 72.6856 17.9014   1
   1  -7 -16 64.0907 17.9717   1
   1  -7 -16 52.1224 16.5037   3
  -1  -7  16 61.2983 15.2303   4
  -1   7  16 20.3814 14.1303   1
   1   7 -16 64.9553 15.2280   5
   1   7 -16 63.8907 18.2456   1
   0  -7 -16 34.4570 13.9641   1
   0  -7 -16 26.1974 14.0737   3
   0  -7  16 30.0083 12.8121   4
   0   7 -16 25.4932 13.0077   5
   0   7 -16 37.8958 15.4824   1
   1  -7  16 40.8136 13.6832   4
  -1  -7 -16 14.1607 13.7824   3
  -1  -7 -16 8.95532 12.3667   1
  -1   7 -16 63.7778 16.7999   1
  -1   7 -16 25.3762 14.6788   5
  -4   0  17 62.8366 14.7159   4
  -4   0  17 80.1445 19.4296   2
   3   0 -17 212.666 20.9595   3
   3   0 -17 215.175 25.8700   1
  -3   0  17 248.209 23.8251   4
  -3   0  17 199.507 26.2013   2
  -2   0  17 379.453 32.7248   4
  -2   0  17 385.155 33.7514   2
   2   0 -17 378.289 34.5844   1
   2   0 -17 357.307 29.3349   3
  -1   0  17 266.494 26.6804   2
   1   0 -17 290.501 24.4450   3
   1   0 -17 322.165 29.8335   1
   0   0 -17 141.843 19.4279   1
   0   0  17 127.449 17.5947   2
   0   0 -17 120.591 16.0255   3
  -1   0 -17 1089.39 76.1499   3
  -1   0 -17 1109.72 78.0453   1
  -1   0 -17 1039.76 73.4138   5
  -2   0 -17 221.758 23.6426   3
  -2   0 -17 192.104 23.3179   1
  -2   0 -17 207.469 19.4123   5
  -3   0 -17 200.787 22.8780   1
  -3   0 -17 205.061 24.9870   3
  -4  -1  17 89.0038 15.5938   4
  -4  -1  17 57.0025 16.3762   2
  -4   1  17 78.4881 14.3606   4
  -4   1  17 54.8884 17.2269   2
   3  -1 -17 60.2650 12.2817   3
  -3  -1  17 37.3750 14.7994   2
   3  -1 -17 61.3596 15.8377   1
  -3  -1  17 46.0939 13.1320   4
  -3   1  17 58.3217 16.0834   2
  -3   1  17 60.2722 13.5513   4
   3   1 -17 58.4396 14.3666   1
  -2  -1  17 211.095 21.9226   2
  -2  -1  17 165.944 20.1234   4
   2  -1 -17 165.823 21.8106   1
   2  -1 -17 176.692 16.8786   3
   2   1 -17 131.702 20.1592   1
  -2   1  17 88.3807 17.2804   2
   2   1 -17 102.315 13.6234   3
  -1  -1  17 192.386 22.8584   4
   1  -1 -17 216.454 24.4497   1
  -1  -1  17 182.467 21.0898   2
   1  -1 -17 220.896 20.5008   3
   1   1 -17 228.174 24.5186   1
  -1   1  17 199.331 22.5228   2
   1   1 -17 224.611 19.5444   3
   0  -1 -17 325.249 30.0495   1
   0  -1  17 319.671 26.2683   2
   0  -1 -17 336.285 27.2777   3
   0   1 -17 316.425 26.1906   3
   0   1  17 290.449 27.0988   2
   0   1 -17 301.663 29.8164   1
   0   1 -17 271.774 25.4585   5
  -1  -1 -17 92.1275 11.3473   5
  -1  -1 -17 90.3507 15.8879   1
  -1  -1 -17 93.9979 15.4331   3
  -1   1 -17 98.2648 14.8803   3
  -1   1 -17 58.3002 14.1666   1
  -1   1 -17 103.022 13.6285   5
  -2  -1 -17 407.863 33.1953   3
  -2  -1 -17 380.647 32.6759   1
  -2   1 -17 313.840 31.4844   3
  -2   1 -17 333.064 28.5023   5
  -2   1 -17 373.505 33.2137   1
  -3  -1 -17 75.4641 13.4173   1
  -3  -1 -17 43.5108 13.6100   3
  -3   1 -17 78.2166 16.3735   3
  -3   1 -17 29.0508 12.1760   5
  -3   1 -17 67.2921 13.9673   1
  -4  -2  17 46.4400 14.5480   4
  -4  -2  17 64.2663 17.4871   2
  -4   2  17 43.7588 16.9163   2
   3  -2 -17 184.139 20.7669   3
  -3  -2  17 157.384 21.4996   4
  -3  -2  17 174.020 23.7350   2
   3  -2 -17 177.937 24.4996   1
  -3   2  17 141.631 21.5411   2
   3   2 -17 177.708 22.9800   1
   2  -2 -17 235.096 23.5918   3
  -2  -2  17 235.334 25.4861   2
  -2  -2  17 245.933 25.0367   4
   2  -2 -17 258.729 27.5329   1
   2   2 -17 215.620 20.5752   3
  -2   2  17 219.572 25.8954   2
   2   2 -17 250.355 26.5884   1
   1  -2 -17 100.682 15.0727   3
   1  -2 -17 93.6341 16.2774   1
  -1  -2  17 94.3102 15.7163   4
  -1  -2  17 75.5411 14.1226   2
  -1   2  17 100.504 16.8952   2
   1   2 -17 111.139 12.6563   3
   1   2 -17 87.9689 16.8678   1
   0  -2  17 11.8389 8.73975   2
   0  -2 -17 21.2240 10.5890   1
   0  -2  17 23.5512 11.6412   4
   0  -2 -17 21.9131 9.94192   3
   0   2 -17 20.3669 10.6248   1
   0   2 -17 29.7800 9.23105   3
   0   2 -17 24.8716 9.69802   5
   0   2  17 22.3156 10.9735   2
  -1  -2 -17 446.962 35.1773   3
  -1  -2 -17 402.550 35.7479   1
  -1   2 -17 405.909 34.1232   3
  -1   2 -17 406.735 32.8329   5
  -1   2 -17 402.225 36.6418   1
  -2  -2 -17 195.159 22.2606   3
  -2  -2 -17 182.506 21.4494   1
  -2   2 -17 144.910 22.1070   1
  -2   2 -17 173.222 19.3379   5
  -2   2 -17 191.636 22.1861   3
  -3  -2 -17 80.9336 15.2780   3
  -3  -2 -17 48.9491 12.1541   1
  -3   2 -17 59.9787 13.9725   1
  -3   2 -17 52.0743 13.5251   5
  -3   2 -17 61.7127 15.8772   3
  -4  -3  17 6.05476 11.8009   4
  -4  -3  17 25.5829 14.1061   2
  -4   3  17 32.9061 16.4550   2
   3  -3 -17 41.0868 13.3425   3
  -3  -3  17 50.7118 16.0098   2
   3  -3 -17 42.9428 14.0488   1
  -3  -3  17 59.4767 14.7160   4
  -3   3  17 31.0636 15.0917   2
   2  -3 -17 144.654 18.9847   3
  -2  -3  17 127.681 19.8969   4
   2  -3 -17 148.675 22.6284   1
  -2  -3  17 133.397 20.2225   2
   2   3 -17 182.693 22.7336   1
  -2   3  17 130.874 22.2629   2
   1  -3 -17 148.730 18.3523   3
  -1  -3  17 104.763 17.3948   4
  -1  -3  17 116.370 17.7340   2
   1  -3 -17 148.734 21.8287   1
   1   3 -17 139.855 14.3677   3
   1   3 -17 165.768 21.7667   1
   0  -3  17 358.445 28.7759   2
   0  -3 -17 342.624 31.1708   3
   0  -3 -17 394.462 34.1838   1
   0  -3  17 327.249 31.2270   4
   0   3 -17 382.012 29.4990   3
   0   3 -17 333.528 29.7983   5
   0   3 -17 385.292 34.6511   1
  -1  -3 -17 66.8549 13.9154   3
  -1  -3 -17 41.6678 12.8201   1
  -1   3 -17 65.8374 13.1011   5
  -1   3 -17 59.6575 14.5019   1
  -1   3 -17 60.8265 12.1050   3
  -2  -3 -17 97.0975 16.3713   1
  -2  -3 -17 120.081 18.7580   3
  -2   3 -17 123.218 18.7805   3
  -2   3 -17 102.683 17.2511   5
  -2   3 -17 136.825 20.2078   1
  -3  -3 -17 56.6263 11.7084   1
  -3  -3 -17 54.1188 15.9461   3
  -3   3 -17 37.2638 13.8382   5
  -3   3 -17 61.9093 14.4014   1
  -3   3 -17 47.0066 14.8318   3
  -4  -4  17 -0.1857 14.2727   2
  -4  -4  17 5.40298 11.6820   4
  -4   4  17 7.54382 12.9075   5
  -3  -4  17 64.1108 16.3621   2
   3  -4 -17 86.2811 16.6095   3
  -3  -4  17 73.1548 16.1828   4
   3  -4 -17 72.4661 16.8336   1
  -3   4  17 30.8629 15.7212   2
   2  -4 -17 158.749 23.8579   1
  -2  -4  17 162.997 22.2952   4
  -2  -4  17 151.667 21.8501   2
   2  -4 -17 190.262 20.9113   3
  -2   4  17 145.628 24.2162   2
   2   4 -17 221.270 25.3049   1
   1  -4 -17 280.458 29.4339   1
  -1  -4  17 294.253 26.1831   2
   1  -4 -17 255.396 26.3699   3
  -1  -4  17 258.260 26.9516   4
  -1   4  17 223.598 27.7586   2
   1   4 -17 295.717 29.8267   1
   0  -4  17 2.07865 10.8088   4
   0  -4 -17 -5.4947 8.53764   3
   0  -4 -17 14.6944 10.3913   1
   0   4 -17 -3.0816 10.5241   5
   0   4 -17 2.58379 7.09308   3
   0   4 -17 1.75812 10.4145   1
  -1  -4 -17 383.529 35.6902   1
  -1  -4 -17 366.402 34.6279   3
  -1   4 -17 437.544 37.8846   1
  -1   4 -17 410.277 34.2876   5
  -1   4 -17 420.446 33.9070   3
  -2  -4 -17 38.1404 11.4613   1
  -2  -4 -17 48.6986 12.8675   3
  -2   4 -17 52.1662 14.3063   1
  -2   4 -17 18.8608 11.4437   3
  -2   4 -17 47.4620 14.1422   5
   3  -5 -17 32.7238 15.7619   1
  -3  -5  17 37.0462 15.4093   2
  -3  -5  17 27.9044 12.7670   4
   3  -5 -17 29.5797 14.0943   3
  -3   5  17 30.7987 16.9426   2
   2  -5 -17 79.9117 18.1067   1
  -2  -5  17 109.806 19.5769   2
   2  -5 -17 107.405 19.0053   3
  -2  -5  17 115.163 18.4338   4
   2   5 -17 127.386 20.6349   1
  -2   5  17 118.028 20.1582   2
  -1  -5  17 32.2400 13.0346   4
   1  -5 -17 30.0435 13.2792   1
  -1  -5  17 26.3614 10.6363   2
   1  -5 -17 28.4358 11.8849   3
   1   5 -17 24.1630 14.1842   1
  -1   5  17 35.2732 15.5952   2
   0  -5  17 170.966 22.4351   4
   0  -5 -17 168.159 23.4273   1
   0  -5 -17 139.448 21.3326   3
   0   5 -17 153.928 21.6449   5
   0   5 -17 186.950 18.2442   3
   0   5 -17 177.542 24.5097   1
  -1  -5 -17 37.4957 12.7729   3
  -1  -5 -17 50.2734 13.8087   1
   1  -5  17 21.8463 12.5069   4
  -1   5 -17 44.4156 14.2715   5
  -1   5 -17 47.1666 14.7555   1
  -1   5 -17 34.3730 11.5699   3
  -2  -5 -17 49.4460 12.7966   1
  -2  -5 -17 50.1846 13.8298   3
  -2   5 -17 63.9815 14.4141   5
  -2   5 -17 57.3400 15.6168   1
  -2   5 -17 61.3003 14.8413   3
  -2  -6  17 29.1709 12.6641   4
  -2  -6  17 22.9635 13.3713   2
   2  -6 -17 38.0743 15.4075   3
   2  -6 -17 4.06531 11.7701   1
   2   6 -17 34.1692 17.0105   1
  -2   6  17 35.7848 15.2805   2
   1  -6 -17 145.475 24.0032   1
   1  -6 -17 148.473 22.7425   3
  -1  -6  17 136.875 20.6525   4
   1   6 -17 127.817 22.2802   1
   0  -6 -17 6.70767 10.3936   1
   0  -6  17 4.49483 10.9853   4
   0  -6 -17 18.6311 11.3458   3
   0   6 -17 17.1521 12.9411   5
   0   6 -17 7.75049 12.4531   1
  -1  -6 -17 111.826 19.2615   3
  -1  -6 -17 63.5359 15.1131   1
   1  -6  17 88.4856 17.3040   4
  -1   6 -17 124.882 18.7986   5
  -1   6 -17 145.518 18.9589   3
  -1   6 -17 144.332 23.3167   1
  -1  -7  17 4.97986 11.6676   4
   1  -7 -17 24.6850 14.7268   1
   1  -7 -17 18.1712 14.0897   3
   1   7 -17 14.5416 12.1236   5
   1   7 -17 25.4694 14.4308   1
   0  -7 -17 88.3908 19.1332   1
   0  -7 -17 92.5690 20.3503   3
   0  -7  17 56.6682 15.7056   4
   0   7 -17 90.6971 18.9765   5
   0   7 -17 93.5053 20.5053   1
  -4   0  18 18.7439 16.2336   2
  -4   0  18 11.9218 11.6156   4
  -3   0  18 148.167 20.6828   4
   3   0 -18 183.144 24.0553   1
  -3   0  18 139.749 23.1744   2
   2   0 -18 151.124 16.3674   3
  -2   0  18 125.870 18.8919   2
  -2   0  18 138.269 20.3762   4
   2   0 -18 148.456 21.5486   1
   1   0 -18 715.846 53.1091   1
   1   0 -18 660.390 47.7481   3
  -1   0  18 592.520 49.0055   2
   0   0 -18 456.615 38.4521   1
   0   0 -18 445.064 34.7115   3
   0   0  18 402.858 35.1621   2
  -1   0 -18 49.2265 13.4727   1
  -1   0 -18 55.6335 10.4919   5
  -1   0 -18 50.1317 11.6509   3
  -2   0 -18 64.1560 14.7313   3
  -2   0 -18 56.7597 14.0644   1
  -2   0 -18 57.5436 10.9873   5
  -3   0 -18 120.299 18.6453   1
  -3   0 -18 114.679 20.1333   3
  -4  -1  18 98.2803 18.9947   2
  -4  -1  18 71.7757 15.8082   4
  -4   1  18 66.0200 17.8228   2
  -4   1  18 128.880 18.0848   4
  -3  -1  18 86.7100 18.0233   2
  -3  -1  18 63.0098 14.9340   4
   3  -1 -18 66.8463 12.7565   3
   3  -1 -18 77.9536 17.5087   1
   3   1 -18 65.2632 15.1697   1
  -3   1  18 61.1215 16.8063   2
  -3   1  18 78.6085 15.2213   4
   2  -1 -18 340.944 29.6800   3
  -2  -1  18 348.451 32.6202   2
   2  -1 -18 355.412 34.4241   1
  -2  -1  18 297.656 30.6199   4
   2   1 -18 434.022 35.6118   1
  -2   1  18 351.087 32.0716   2
   2   1 -18 366.025 28.0560   3
  -1  -1  18 171.022 20.0256   2
   1  -1 -18 158.349 22.4178   1
   1  -1 -18 202.657 19.0893   3
  -1  -1  18 139.401 19.9343   4
   1   1 -18 163.876 22.3442   1
   1   1 -18 160.495 17.1100   3
  -1   1  18 148.277 21.1658   2
   0  -1  18 345.307 30.2938   2
   0  -1 -18 358.922 31.1680   3
   0  -1 -18 386.265 34.6467   1
   0   1 -18 417.166 35.5534   1
   0   1  18 384.201 32.4180   2
   0   1 -18 363.035 30.3930   3
  -1  -1 -18 355.265 30.2839   3
  -1  -1 -18 373.661 32.8264   1
  -1   1 -18 337.538 32.3096   1
  -1   1 -18 310.173 27.5113   5
  -1   1 -18 319.022 29.5257   3
  -2  -1 -18 72.8793 14.5945   3
  -2  -1 -18 81.6211 15.5443   1
  -2   1 -18 85.1337 16.0505   1
  -2   1 -18 94.0078 14.0809   5
  -2   1 -18 69.9589 14.0894   3
  -3  -1 -18 137.317 27.2298   3
  -3  -1 -18 121.139 18.0494   1
  -3   1 -18 124.381 19.7306   1
  -3   1 -18 108.839 19.8611   3
  -4  -2  18 40.4950 14.6700   4
  -4  -2  18 26.5856 14.5222   2
  -4   2  18 48.7639 15.8509   2
  -3  -2  18 197.544 26.4625   2
   3  -2 -18 235.651 24.1096   3
   3  -2 -18 267.445 29.2469   1
  -3  -2  18 230.901 24.3120   4
   3   2 -18 210.379 27.4548   1
  -3   2  18 195.418 27.1191   2
   2  -2 -18 173.305 19.5227   3
  -2  -2  18 154.755 21.4585   2
  -2  -2  18 178.978 21.9775   4
   2  -2 -18 184.260 23.8427   1
  -2   2  18 142.415 22.5476   2
   2   2 -18 137.069 21.8461   1
   1  -2 -18 430.254 36.2938   3
   1  -2 -18 412.158 39.3165   1
  -1  -2  18 478.694 37.0502   2
  -1  -2  18 393.664 37.7853   4
   1   2 -18 542.375 41.6142   1
  -1   2  18 412.112 38.1727   2
   1   2 -18 495.346 34.5292   3
   0  -2 -18 194.769 22.5330   3
   0  -2 -18 227.544 25.7399   1
   0  -2  18 223.807 21.9649   2
   0   2 -18 235.042 21.6589   3
   0   2 -18 210.786 21.5999   5
   0   2  18 257.862 24.8499   2
   0   2 -18 284.470 27.2904   1
  -1  -2 -18 140.733 21.1389   1
  -1  -2 -18 153.312 19.7709   3
  -1   2 -18 169.353 19.2591   5
  -1   2 -18 148.302 21.4764   1
  -1   2 -18 139.047 18.7296   3
  -2  -2 -18 110.173 17.3146   1
  -2  -2 -18 68.1990 14.9836   3
  -2   2 -18 76.3319 15.8004   1
  -2   2 -18 106.403 15.7531   5
  -2   2 -18 83.7391 15.6886   3
  -3  -2 -18 76.7914 14.9601   1
  -3   2 -18 109.204 17.6758   5
  -3   2 -18 133.262 27.9669   3
  -3   2 -18 94.1731 17.8752   1
  -4  -3  18 47.8276 15.0434   4
  -4  -3  18 45.0924 20.0098   2
   3  -3 -18 81.7632 15.8749   3
   3  -3 -18 83.4833 17.5658   1
  -3  -3  18 71.6347 16.8643   2
  -3  -3  18 87.3281 16.1390   4
  -3   3  18 53.5937 17.8083   2
  -2  -3  18 95.6637 17.6757   4
  -2  -3  18 122.951 19.7914   2
   2  -3 -18 150.000 22.4379   1
   2  -3 -18 109.032 17.2221   3
   2   3 -18 167.993 22.3825   1
  -2   3  18 84.3549 18.9581   2
   1  -3 -18 86.2507 15.7513   3
  -1  -3  18 96.8433 15.2702   2
  -1  -3  18 92.9757 16.9184   4
   1  -3 -18 84.3381 17.5015   1
   1   3 -18 108.459 12.7834   3
  -1   3  18 85.8026 17.0540   2
   1   3 -18 85.3832 16.5775   1
   0  -3 -18 334.466 32.0509   1
   0  -3  18 316.429 26.8197   2
   0  -3  18 273.932 28.9850   4
   0  -3 -18 363.637 30.0703   3
   0   3 -18 314.749 26.7160   3
   0   3 -18 290.702 28.5829   5
   0   3 -18 352.735 33.1989   1
  -1  -3 -18 217.395 24.5322   3
  -1  -3 -18 215.340 25.8613   1
  -1   3 -18 246.171 23.5339   5
  -1   3 -18 192.031 25.8190   1
  -1   3 -18 238.902 23.5400   3
  -2  -3 -18 31.8912 11.9692   1
  -2  -3 -18 40.0511 13.4273   3
  -2   3 -18 59.6367 13.1607   5
  -2   3 -18 45.3036 13.6854   3
  -2   3 -18 63.2853 15.1457   1
  -3  -4  18 68.2804 14.9721   4
   3  -4 -18 107.384 17.6583   3
  -3  -4  18 82.2277 18.5260   2
   3  -4 -18 66.1183 17.3575   1
  -3   4  18 62.9895 17.6461   2
   2  -4 -18 122.593 21.3345   1
  -2  -4  18 118.849 19.4450   2
  -2  -4  18 74.1219 15.7972   4
   2  -4 -18 124.965 18.8751   3
  -2   4  18 76.5995 19.3520   2
   2   4 -18 122.509 21.2746   1
   1  -4 -18 269.362 26.0395   3
  -1  -4  18 280.235 25.6865   2
  -1  -4  18 251.586 27.5394   4
   1  -4 -18 305.281 30.2696   1
  -1   4  18 212.436 28.1608   2
   1   4 -18 292.058 30.8838   1
   0  -4  18 57.4203 15.4348   4
   0  -4 -18 45.4452 14.4369   1
   0  -4 -18 70.9527 14.7680   3
   0   4 -18 62.0568 11.5467   3
   0   4 -18 84.9600 16.5439   1
   0   4 -18 74.0582 14.3139   5
  -1  -4 -18 28.8302 12.8041   3
  -1  -4 -18 45.8355 13.1811   1
  -1   4 -18 28.6351 11.2492   3
  -1   4 -18 29.2688 13.2601   1
  -1   4 -18 19.1551 12.2846   5
  -2  -4 -18 133.202 20.7221   3
  -2  -4 -18 111.629 18.2512   1
  -2   4 -18 101.508 17.7711   3
  -2   4 -18 79.2253 16.4000   5
  -2   4 -18 116.598 20.0640   1
  -3  -5  18 53.3597 16.8834   2
   3  -5 -18 62.9772 17.1157   1
   3  -5 -18 30.4574 14.6245   3
  -3  -5  18 30.2120 21.0014   4
  -3   5  18 23.3740 26.2030   2
  -2  -5  18 94.5200 18.3253   4
   2  -5 -18 137.280 23.4294   1
  -2  -5  18 98.7383 18.4604   2
   2  -5 -18 121.934 19.7945   3
   2   5 -18 153.775 24.3171   1
  -2   5  18 129.992 22.1542   2
   1  -5 -18 14.1553 12.5510   1
  -1  -5  18 6.30242 15.4163   2
   1  -5 -18 29.0882 13.4082   3
  -1  -5  18 13.0596 11.5343   4
   1   5 -18 33.8506 14.7463   1
  -1   5  18 29.4227 14.3671   2
   0  -5 -18 240.542 27.2749   1
   0  -5  18 191.902 25.1666   4
   0  -5 -18 207.425 25.2470   3
   0   5 -18 228.177 24.9387   5
   0   5 -18 204.293 27.3412   1
  -1  -5 -18 125.579 20.9672   1
  -1  -5 -18 105.409 19.3249   3
  -1   5 -18 152.077 23.8960   1
  -1   5 -18 122.375 20.3056   5
  -1   5 -18 152.232 19.1883   3
  -2  -5 -18 31.5384 15.3478   1
  -2   5 -18 8.25388 11.1510   3
  -2   5 -18 34.0461 14.4937   5
  -2  -6  18 11.8525 14.6486   4
   2  -6 -18 39.1602 15.7753   1
  -2  -6  18 14.5422 12.5722   2
   2  -6 -18 17.7026 12.9434   3
  -2   6  18 25.4125 18.5315   2
  -1  -6  18 96.7161 17.6272   4
   1  -6 -18 163.412 23.1137   3
   1  -6 -18 130.313 21.8840   1
   1   6 -18 123.619 23.2738   1
   0  -6 -18 29.2062 12.9783   1
   0  -6 -18 15.6552 11.6362   3
   0  -6  18 23.8388 13.7617   4
   0   6 -18 32.7523 13.0753   5
   0   6 -18 14.5866 12.6842   1
   1  -6  18 55.7995 15.5286   4
  -1   6 -18 52.5447 17.6277   1
  -1   6 -18 66.5211 15.3593   5
  -4   0  19 121.045 19.1386   4
  -3   0  19 94.9088 17.4429   4
  -3   0  19 101.560 19.6127   2
   3   0 -19 91.4236 18.0887   1
   2   0 -19 407.109 35.8473   1
  -2   0  19 347.474 31.4297   2
   2   0 -19 323.394 28.2926   3
  -2   0  19 309.928 31.5809   4
  -1   0  19 36.2706 12.8374   2
   1   0 -19 9.10338 8.71618   3
   1   0 -19 19.4898 12.5952   1
   0   0 -19 505.824 43.8203   1
   0   0 -19 494.025 39.9354   3
   0   0  19 534.795 40.3538   2
  -1   0 -19 130.548 20.7114   1
  -1   0 -19 124.747 18.2952   3
  -1   0 -19 132.983 15.7088   5
  -2   0 -19 267.755 29.0279   1
  -2   0 -19 266.319 28.1289   3
  -4  -1  19 43.3892 14.8038   4
  -4   1  19 48.8341 14.6344   4
  -3  -1  19 190.653 24.7000   4
   3  -1 -19 183.780 25.7955   1
  -3  -1  19 175.180 24.0713   2
  -3   1  19 172.617 25.0354   2
   3   1 -19 223.395 26.5299   1
   2  -1 -19 203.609 24.8366   1
  -2  -1  19 148.127 22.1255   2
  -2  -1  19 117.173 20.0687   4
   2  -1 -19 149.967 18.6562   3
   2   1 -19 164.998 19.0696   3
   2   1 -19 166.669 23.4852   1
  -2   1  19 179.466 23.2135   2
  -1  -1  19 416.113 37.1055   4
  -1  -1  19 418.093 36.8330   2
   1  -1 -19 426.193 35.2839   3
   1  -1 -19 455.564 39.8860   1
  -1   1  19 427.657 37.5893   2
   1   1 -19 464.813 40.2383   1
   1   1 -19 470.766 34.5943   3
   0  -1  19 46.8739 12.7463   2
   0  -1 -19 87.0430 16.1908   1
   0  -1 -19 78.9662 14.2417   3
   0   1 -19 75.0192 15.7653   1
   0   1  19 65.0209 13.9161   2
   0   1 -19 58.9732 12.2433   3
  -1  -1 -19 221.671 25.3631   1
  -1  -1 -19 205.135 22.6078   3
  -1   1 -19 204.838 22.4275   3
  -1   1 -19 189.774 19.9938   5
  -1   1 -19 181.857 24.5833   1
  -2  -1 -19 77.5389 16.2435   3
  -2  -1 -19 69.2040 15.4403   1
  -2   1 -19 81.7986 16.3747   1
  -2   1 -19 64.9670 14.7095   3
  -2   1 -19 102.731 14.5243   5
  -3  -2  19 25.9331 14.4418   2
   3  -2 -19 36.1720 15.1740   1
   3  -2 -19 26.9158 11.1073   3
  -3  -2  19 33.0295 13.7397   4
  -3   2  19 27.9336 14.2908   2
   2  -2 -19 405.077 35.6325   1
   2  -2 -19 355.408 30.1358   3
  -2  -2  19 343.344 32.7762   4
  -2  -2  19 315.348 31.9430   2
  -2   2  19 272.241 32.3912   2
   2   2 -19 359.015 34.4121   1
   1  -2 -19 89.6791 14.7483   3
  -1  -2  19 81.1391 14.4412   2
  -1  -2  19 70.9517 16.4137   4
   1  -2 -19 62.2197 16.0176   1
   1   2 -19 67.7156 15.8381   1
  -1   2  19 59.8593 15.4789   2
   1   2 -19 105.114 13.1202   3
   0  -2 -19 653.138 50.8828   1
   0  -2  19 592.717 45.8621   2
   0  -2 -19 617.704 47.0991   3
   0   2 -19 593.415 46.4810   5
   0   2 -19 619.473 51.0040   1
   0   2  19 636.606 48.3737   2
   0   2 -19 616.126 46.0740   3
  -1  -2 -19 125.733 20.4852   1
  -1  -2 -19 122.719 19.2756   3
  -1   2 -19 138.463 22.0384   1
  -1   2 -19 146.940 17.9384   5
  -1   2 -19 140.687 18.7374   3
  -2  -2 -19 128.247 20.9099   1
  -2  -2 -19 142.995 21.0182   3
  -2   2 -19 135.937 20.9092   3
  -2   2 -19 137.799 18.0395   5
  -2   2 -19 129.229 21.0132   1
  -3  -3  19 91.0300 18.2234   2
  -3  -3  19 106.844 18.7437   4
   3  -3 -19 112.334 19.5832   1
   3  -3 -19 94.3446 16.8515   3
  -3   3  19 71.2315 18.0839   2
  -2  -3  19 39.7624 13.9842   2
  -2  -3  19 51.2317 14.6621   4
   2  -3 -19 20.7973 13.1198   1
   2  -3 -19 55.9951 14.3444   3
  -2   3  19 23.6339 15.8511   2
   2   3 -19 30.9248 14.8797   1
   1  -3 -19 201.475 22.6756   3
  -1  -3  19 152.558 22.7390   4
   1  -3 -19 227.228 26.7483   1
  -1  -3  19 186.934 21.8482   2
  -1   3  19 159.574 24.0137   2
   1   3 -19 233.177 26.2039   1
   0  -3 -19 31.1686 12.5916   3
   0  -3 -19 47.9498 14.2058   1
   0  -3  19 48.0145 14.0028   4
   0   3 -19 46.4845 15.0024   1
   0   3 -19 46.2383 12.7697   5
   0   3 -19 40.6798 10.6032   3
  -1  -3 -19 232.268 24.9866   3
  -1  -3 -19 198.392 25.5302   1
  -1   3 -19 221.709 26.6572   1
  -1   3 -19 220.127 22.7997   5
  -1   3 -19 180.657 22.3328   3
  -2  -3 -19 142.997 21.6139   1
  -2  -3 -19 158.282 21.0282   3
  -2   3 -19 149.628 23.3338   1
  -2   3 -19 166.038 20.4746   5
  -2   3 -19 139.061 21.2009   3
  -3  -4  19 1.74872 13.2721   2
   3  -4 -19 1.53667 11.8004   3
   3  -4 -19 4.32582 12.3422   1
  -3  -4  19 6.93198 13.1252   4
  -3   4  19 -8.8144 14.0713   2
   2  -4 -19 89.1096 18.3652   1
   2  -4 -19 102.666 16.8531   3
  -2  -4  19 80.7047 17.8769   4
  -2  -4  19 77.8220 16.6714   2
   2   4 -19 72.1602 16.7777   1
  -2   4  19 117.564 22.0413   2
  -1  -4  19 28.9264 11.2210   2
  -1  -4  19 7.13452 12.0070   4
   1  -4 -19 0.63776 9.50214   3
   1  -4 -19 0.15392 9.87948   1
  -1   4  19 12.8136 14.1293   2
   1   4 -19 6.36665 12.4858   1
   0  -4  19 383.600 36.2574   4
   0  -4 -19 392.395 37.4566   1
   0  -4 -19 416.350 36.0516   3
   0   4 -19 380.503 34.6334   5
   0   4 -19 392.334 38.4497   1
   0   4 -19 414.722 32.5147   3
  -1  -4 -19 71.2183 16.3006   1
  -1  -4 -19 86.2133 16.1133   3
  -1   4 -19 81.6884 15.3859   3
  -1   4 -19 109.203 18.1775   5
  -1   4 -19 65.2555 16.6697   1
  -2  -4 -19 95.3697 20.3298   1
  -2   4 -19 103.580 18.7782   5
  -2   4 -19 74.9403 16.3433   3
  -2  -5  19 29.9668 13.3808   2
  -2  -5  19 46.6507 13.8998   4
   2  -5 -19 50.8189 15.6287   1
   2  -5 -19 50.7331 15.5312   3
  -2   5  19 32.4308 16.6734   2
   2   5 -19 44.8501 16.0828   1
   1  -5 -19 196.733 25.4864   3
   1  -5 -19 198.988 27.8447   1
  -1  -5  19 220.061 25.9667   4
   1   5 -19 201.878 27.5949   1
   0  -5 -19 -0.6715 10.6097   3
   0  -5  19 15.2733 13.5202   4
   0  -5 -19 15.3955 11.5549   1
   0   5 -19 17.6032 11.6433   5
   0   5 -19 22.4472 14.4430   1
  -1  -5 -19 167.883 23.4015   3
  -1  -5 -19 130.360 22.5874   1
  -1   5 -19 150.705 20.4352   3
  -1   5 -19 177.929 22.4126   5
  -1   5 -19 137.936 23.1674   1
  -1  -6  19 23.4357 14.4893   4
   1  -6 -19 22.2117 15.6816   3
   1  -6 -19 20.5730 15.4969   1
   1   6 -19 77.2598 19.2723   1
   0  -6  19 148.088 24.3090   4
   0   6 -19 216.391 30.2149   5
   0   6 -19 175.391 27.3978   1
  -3   0  20 227.531 26.6796   4
   3   0 -20 288.244 30.5635   1
  -3   0  20 196.209 28.3082   2
   2   0 -20 94.0780 14.8509   3
  -2   0  20 67.9393 15.7558   2
   2   0 -20 135.341 21.6297   1
   1   0 -20 281.579 29.3101   1
  -1   0  20 219.408 25.7776   2
   1   0 -20 237.722 23.1843   3
   0   0 -20 117.387 17.1878   3
   0   0  20 104.842 18.5956   2
   0   0 -20 160.367 22.7597   1
  -1   0 -20 223.873 23.8157   3
  -1   0 -20 195.008 26.0314   1
  -2   0 -20 106.318 19.2772   1
  -2   0 -20 118.503 18.6267   3
   3  -1 -20 77.7120 17.0952   1
  -3  -1  20 62.3207 16.5191   2
  -3  -1  20 62.5967 15.3015   4
  -3   1  20 37.3699 14.4319   2
  -2  -1  20 124.211 20.7110   4
  -2  -1  20 166.081 22.8131   2
   2  -1 -20 181.526 24.4841   1
   2  -1 -20 148.810 19.1457   3
  -2   1  20 169.637 24.0267   2
   2   1 -20 149.618 24.0558   1
   1  -1 -20 122.518 20.2609   1
   1  -1 -20 138.950 17.4607   3
  -1  -1  20 115.472 18.8798   2
  -1   1  20 119.333 20.2704   2
   1   1 -20 104.692 19.7553   1
   1   1 -20 118.517 15.9902   3
   0  -1  20 138.489 19.1590   2
   0  -1 -20 131.281 18.5274   3
   0  -1 -20 159.640 23.0059   1
   0   1 -20 130.526 17.5371   3
   0   1  20 103.952 18.7549   2
   0   1 -20 161.660 22.7463   1
  -1  -1 -20 62.9005 14.8107   3
  -1  -1 -20 28.8610 12.5015   1
  -1   1 -20 43.1749 12.8332   3
  -1   1 -20 51.8983 11.4209   5
  -1   1 -20 64.1121 15.6610   1
  -2  -1 -20 115.566 19.8815   3
  -2  -1 -20 128.883 21.8586   1
  -2   1 -20 175.190 23.5014   1
  -2   1 -20 142.128 21.3737   3
   3  -2 -20 139.397 23.5388   1
  -3  -2  20 80.1754 18.3507   2
   3  -2 -20 109.030 17.8781   3
  -3  -2  20 112.590 18.8764   4
  -3   2  20 115.473 21.7667   2
   2  -2 -20 135.944 21.7734   1
   2  -2 -20 94.4633 15.9064   3
  -2  -2  20 95.9594 17.6090   2
  -2  -2  20 85.2731 17.1392   4
   2   2 -20 98.1012 19.4498   1
  -2   2  20 89.4205 19.1221   2
  -1  -2  20 291.796 27.1761   2
  -1  -2  20 251.360 28.5397   4
   1  -2 -20 281.145 26.4196   3
   1  -2 -20 275.784 30.3399   1
  -1   2  20 228.050 28.5462   2
   1   2 -20 277.214 30.7110   1
   1   2 -20 263.312 23.5495   3
   0  -2 -20 78.0838 16.1476   1
   0  -2 -20 31.8660 12.2388   3
   0   2 -20 51.7713 11.9205   3
   0   2 -20 47.6191 14.8741   1
   0   2  20 53.2305 14.5428   2
  -1  -2 -20 257.498 25.5416   3
  -1  -2 -20 281.600 28.7048   1
  -1   2 -20 235.525 23.9736   5
  -1   2 -20 229.307 25.0441   3
  -1   2 -20 233.772 28.6965   1
  -2  -2 -20 43.5339 14.5369   1
  -2  -2 -20 68.5230 18.1805   3
  -2   2 -20 66.3473 15.9838   3
  -2   2 -20 76.1427 22.5680   1
  -2   2 -20 76.6631 14.0164   5
  -3  -3  20 153.182 22.0639   4
  -3  -3  20 98.1145 19.8718   2
   3  -3 -20 134.205 19.6585   3
   3  -3 -20 101.776 20.2425   1
  -3   3  20 77.2173 23.5870   2
   2  -3 -20 106.737 17.7561   3
  -2  -3  20 53.9218 14.8919   4
  -2  -3  20 77.4196 16.2500   2
   2  -3 -20 85.1036 18.2056   1
   2   3 -20 70.5253 17.2134   1
  -2   3  20 52.6089 16.5471   2
   1  -3 -20 226.362 27.4001   1
  -1  -3  20 175.093 21.8059   2
  -1  -3  20 149.801 23.3959   4
   1  -3 -20 237.848 23.7549   3
  -1   3  20 142.360 24.2204   2
   1   3 -20 185.362 26.1018   1
   0  -3 -20 126.138 19.0508   3
   0  -3 -20 141.939 23.1102   1
   0   3 -20 143.608 17.8494   3
   0   3 -20 166.068 23.9354   1
   0   3 -20 151.308 19.8775   5
  -1  -3 -20 63.0414 16.3773   1
  -1  -3 -20 48.1332 14.7449   3
  -1   3 -20 40.4756 12.4730   3
  -1   3 -20 65.4623 13.8585   5
  -1   3 -20 42.1081 15.6528   1
  -2  -4  20 141.033 21.4318   2
  -2  -4  20 147.229 20.7999   4
   2  -4 -20 122.679 21.5857   1
   2  -4 -20 150.920 22.0213   3
   2   4 -20 192.793 25.4473   1
  -2   4  20 54.0768 20.8360   2
   1  -4 -20 151.813 21.1346   3
   1  -4 -20 103.429 20.2986   1
  -1  -4  20 142.200 21.9445   4
   1   4 -20 197.473 25.5395   1
  -1   4  20 130.561 21.8701   2
   0  -4 -20 86.7510 16.8321   3
   0  -4 -20 73.1833 17.3096   1
   0  -4  20 85.5261 17.9373   4
   0   4 -20 71.7986 15.7655   5
   0   4 -20 85.9317 19.7957   1
  -1  -4 -20 135.125 20.0290   3
  -1  -4 -20 139.232 21.9102   1
  -1   4 -20 123.403 21.5843   1
  -1   4 -20 115.041 18.6371   3
  -1   4 -20 153.152 20.6439   5
  -2  -5  20 23.3983 13.2512   2
   2  -5 -20 8.94712 13.6420   3
   2  -5 -20 30.3815 14.2959   1
   2   5 -20 20.0048 13.4194   1
  -1  -5  20 109.738 19.7777   4
   1  -5 -20 148.931 22.1070   3
   1  -5 -20 97.7606 19.7585   1
   1   5 -20 105.962 21.1768   1
   0  -5 -20 43.4412 15.3161   1
   0  -5  20 71.9504 17.3851   4
   0  -5 -20 73.8555 16.8299   3
   0   5 -20 73.2124 18.0313   1
   0   5 -20 84.2270 16.9518   5
  -3   0  21 159.533 25.6499   2
  -3   0  21 153.872 23.2994   4
   2   0 -21 125.080 20.6093   1
  -2   0  21 73.0336 17.3089   2
   1   0 -21 305.417 31.3397   1
  -1   0  21 244.430 28.1524   2
   1   0 -21 257.187 24.9849   3
   0   0  21 24.2034 11.9973   2
   0   0 -21 24.4506 10.3698   3
   0   0 -21 47.4810 15.3392   1
  -1   0 -21 299.955 30.0574   3
  -1   0 -21 357.000 34.4115   1
   3  -1 -21 47.6551 15.2213   1
  -3  -1  21 41.4089 15.7871   4
  -3  -1  21 28.3014 16.0184   2
  -3   1  21 26.7286 15.6367   2
  -2  -1  21 145.642 22.1197   4
   2  -1 -21 204.833 26.0137   1
  -2  -1  21 144.133 22.2308   2
   2  -1 -21 151.581 19.8494   3
   2   1 -21 185.447 25.5635   1
  -2   1  21 142.215 23.9854   2
  -1  -1  21 29.1948 13.3826   2
   1  -1 -21 39.3733 12.4141   3
   1  -1 -21 27.9165 14.5444   1
   1   1 -21 21.4058 9.92047   3
   1   1 -21 20.3984 12.4362   1
  -1   1  21 17.3128 14.1533   2
   0  -1  21 292.851 27.4238   2
   0  -1 -21 246.051 26.4563   3
   0  -1 -21 292.874 31.3935   1
   0   1  21 226.254 27.5840   2
   0   1 -21 288.580 26.3762   3
   0   1 -21 315.211 31.8595   1
  -1  -1 -21 147.342 23.9710   1
  -1  -1 -21 133.286 21.0535   3
  -1   1 -21 178.796 19.4014   5
  -1   1 -21 162.026 24.1717   1
  -1   1 -21 141.200 20.3873   3
   3  -2 -21 199.934 28.0641   1
  -3  -2  21 117.205 21.1633   4
  -3  -2  21 171.706 25.9511   2
   2  -2 -21 47.3951 12.9425   3
  -2  -2  21 39.3159 14.8849   4
   2  -2 -21 98.4743 19.4600   1
  -2  -2  21 45.5055 14.7043   2
  -2   2  21 20.7845 16.8194   2
   2   2 -21 72.6926 17.0073   1
   1  -2 -21 239.811 24.2956   3
   1  -2 -21 196.145 27.6459   1
  -1  -2  21 201.862 26.6182   4
  -1  -2  21 208.903 24.1609   2
   1   2 -21 253.040 29.0025   1
   0  -2 -21 41.8428 13.3348   3
   0  -2 -21 44.8498 15.6308   1
   0   2 -21 82.7944 18.3193   1
   0   2 -21 51.2609 12.0700   3
  -1  -2 -21 215.998 25.3793   3
  -1  -2 -21 226.974 27.7123   1
  -1   2 -21 213.265 27.6243   1
  -1   2 -21 204.880 22.5814   5
  -1   2 -21 231.526 24.4833   3
  -2  -3  21 253.608 28.2817   2
   2  -3 -21 235.604 30.4737   1
  -2  -3  21 232.618 28.6941   4
   2  -3 -21 311.343 27.9110   3
   2   3 -21 240.730 30.6804   1
  -2   3  21 200.240 29.8545   2
   1  -3 -21 27.8475 12.1951   3
  -1  -3  21 40.5829 16.2637   2
   1  -3 -21 59.3275 16.0364   1
  -1  -3  21 23.0153 14.4604   4
   1   3 -21 46.6563 16.3001   1
  -1   3  21 21.7456 13.4356   2
   0  -3 -21 215.273 27.7817   1
   0  -3 -21 200.268 24.6332   3
   0   3 -21 206.026 23.0370   5
   0   3 -21 201.716 27.6526   1
   0   3 -21 184.063 20.4974   3
  -1  -3 -21 65.7848 16.4925   3
  -1   3 -21 80.4139 23.6166   1
  -1   3 -21 73.3339 15.1537   3
  -1   3 -21 65.5521 14.2281   5
  -2  -4  21 52.3530 15.1002   2
   2  -4 -21 50.2583 14.7029   3
   2  -4 -21 57.1601 16.6883   1
   2   4 -21 85.6077 19.3988   1
   1  -4 -21 202.017 24.2381   3
  -1  -4  21 176.453 25.4209   4
   1  -4 -21 200.083 27.3038   1
  -1   4  21 140.222 24.2994   2
   1   4 -21 212.163 27.5085   1
   0  -4 -21 106.521 19.1097   3
   0  -4  21 72.2534 18.1329   4
   0  -4 -21 77.2781 19.8416   1
   0   4 -21 103.617 18.4638   5
   0   4 -21 75.3093 19.1412   1
   2   0 -22 219.926 28.7364   1
  -2   0  22 197.643 26.6210   2
   1   0 -22 142.640 24.3293   1
   1   0 -22 160.744 18.8948   3
  -1   0  22 125.686 20.7253   2
   0   0  22 587.192 48.1638   2
   0   0 -22 690.418 54.5233   1
   0   0 -22 645.223 49.0362   3
  -1   0 -22 25.3764 12.5079   3
   2  -1 -22 69.0180 14.7087   3
   2  -1 -22 70.4899 18.2173   1
  -2  -1  22 60.2602 15.8835   4
  -2  -1  22 56.5658 15.5314   2
  -2   1  22 51.6423 16.5291   2
   2   1 -22 54.8302 15.9111   1
   1  -1 -22 231.477 28.7604   1
  -1  -1  22 155.792 24.8312   2
   1  -1 -22 230.133 23.4142   3
   1   1 -22 226.746 28.5507   1
  -1   1  22 205.356 26.0420   2
   1   1 -22 193.753 24.5256   3
   0  -1 -22 29.1953 14.2357   1
   0  -1 -22 33.3832 11.9273   3
   0   1  22 32.0498 13.7410   2
   0   1 -22 39.6310 15.4044   1
   0   1 -22 58.7626 13.7448   3
  -1  -1 -22 183.157 22.9661   3
  -1   1 -22 135.199 20.6511   3
  -2  -2  22 69.7583 17.7833   4
   2  -2 -22 86.9156 15.6130   3
   2  -2 -22 73.8921 17.9695   1
  -2  -2  22 94.8687 17.8041   2
  -2   2  22 36.8094 17.8998   2
   2   2 -22 67.0970 17.4928   1
  -1  -2  22 83.9349 17.1509   2
   1  -2 -22 102.628 17.7526   3
   1  -2 -22 150.068 24.3187   1
  -1   2  22 81.3844 18.4171   2
   1   2 -22 126.109 22.7506   1
   0  -2 -22 312.712 30.1419   3
   0  -2 -22 296.430 33.2500   1
   0   2 -22 269.149 28.0146   3
   0   2 -22 370.851 35.7296   1
   1  -3 -22 71.1724 16.7182   3
   1  -3 -22 76.6082 19.0986   1
   1   3 -22 77.6270 18.1956   1
  -1   3  22 58.8495 16.8363   2
   0  -3 -22 55.3049 15.6376   3
   0   3 -22 68.9786 18.7813   1
  -1   0  23 28.4333 15.5794   2
   1   0 -23 55.3418 13.3498   3
   1   0 -23 59.9277 17.6138   1
   0   0 -23 19.7203 11.4694   3
  -1  -1  23 155.409 25.1321   2
   1  -1 -23 195.472 22.4568   3
   1  -1 -23 208.757 28.2045   1
   1   1 -23 193.247 28.2471   1
   0   0   0    0.00    0.00   0

 _exptl_absorpt_process_details
)
 SADABS 2016/2: Krause, L., Herbst-Irmer, R., Sheldrick G.M. & Stalke D.,
 J. Appl. Cryst. 48 (2015) 3-10
)
 _exptl_absorpt_correction_type   multi-scan
 _exptl_absorpt_correction_T_max  0.2601
 _exptl_absorpt_correction_T_min  0.2060
 _exptl_special_details
)
 The following wavelength and cell were deduced by SADABS from the
 direction cosines etc. They are given here for emergency use only:
 CELL 0.71076    4.864    8.696   18.610   89.986   97.400   90.005
)
;
_shelx_hkl_checksum               67829
_olex2_submission_special_instructions 'No special instructions were received'
loop_
  _twin_individual_id
  _twin_individual_mass_fraction_refined
 1 0.6946(11)
 2 0.3054(11)
