# Supplementary material for: Controlling Pd(iv) reductive elimination pathways enables Pd(ii)-catalysed enantioselective C(sp3)−H fluorination
Source: Springer Nature journal article supplement (doi:10.1038/s41557-018-0048-1), 2018-06-08
Supplement: 41557_2018_48_MOESM250_ESM.mol [file 41557_2018_48_MOESM250_ESM.mol]

nchem.17061263C-comp5a.mol
  ChemDraw03211811282D

 23 24  0  0  1  0  0  0  0  0999 V2000
   -1.7865   -0.4125    0.0000 C   0  0  0  0  0  0  0  0  0  0  0  0
   -1.7865   -1.2375    0.0000 C   0  0  0  0  0  0  0  0  0  0  0  0
   -1.0719   -1.6500    0.0000 C   0  0  0  0  0  0  0  0  0  0  0  0
   -0.3574   -1.2375    0.0000 C   0  0  0  0  0  0  0  0  0  0  0  0
   -0.3574   -0.4125    0.0000 C   0  0  0  0  0  0  0  0  0  0  0  0
   -1.0719   -0.0000    0.0000 C   0  0  0  0  0  0  0  0  0  0  0  0
    0.3572   -0.0000    0.0000 C   0  0  0  0  0  0  0  0  0  0  0  0
    0.3572   -1.6500    0.0000 C   0  0  0  0  0  0  0  0  0  0  0  0
    1.0717   -1.2375    0.0000 F   0  0  0  0  0  0  0  0  0  0  0  0
    1.0716   -0.4125    0.0000 O   0  0  0  0  0  0  0  0  0  0  0  0
    0.3572    0.8250    0.0000 N   0  0  0  0  0  0  0  0  0  0  0  0
    1.0717    1.2375    0.0000 C   0  0  0  0  0  0  0  0  0  0  0  0
    1.7861    0.8250    0.0000 C   0  0  0  0  0  0  0  0  0  0  0  0
    2.5006    1.2375    0.0000 C   0  0  0  0  0  0  0  0  0  0  0  0
    2.5006    2.0625    0.0000 C   0  0  0  0  0  0  0  0  0  0  0  0
    1.7861    2.4750    0.0000 C   0  0  0  0  0  0  0  0  0  0  0  0
    1.0717    2.0625    0.0000 C   0  0  0  0  0  0  0  0  0  0  0  0
    3.2151    2.4750    0.0000 Br  0  0  0  0  0  0  0  0  0  0  0  0
    0.3572   -2.4750    0.0000 C   0  0  0  0  0  0  0  0  0  0  0  0
   -2.5005   -0.0000    0.0000 C   0  0  0  0  0  0  0  0  0  0  0  0
   -2.0880    0.7145    0.0000 F   0  0  0  0  0  0  0  0  0  0  0  0
   -3.2151    0.4125    0.0000 F   0  0  0  0  0  0  0  0  0  0  0  0
   -2.9130   -0.7145    0.0000 F   0  0  0  0  0  0  0  0  0  0  0  0
  8 19  1  0      
 20 21  1  0      
 20 22  1  0      
 20 23  1  0      
  1 20  1  0      
  1  2  2  0      
  2  3  1  0      
  3  4  2  0      
  4  5  1  0      
  5  6  2  0      
  6  1  1  0      
  5  7  1  0      
  4  8  1  0      
  8  9  1  6      
  7 10  2  0      
  7 11  1  0      
 11 12  1  0      
 12 13  2  0      
 13 14  1  0      
 14 15  2  0      
 15 16  1  0      
 16 17  2  0      
 17 12  1  0      
 15 18  1  0      
M  STY  1   1 SUP
M  SLB  1   1   1
M  SAL   1  1  19
M  SBL   1  1   1
M  SMT   1 Me
M  SBV   1   1    0.0000    0.8250
M  STY  1   2 SUP
M  SLB  1   2   2
M  SAL   2  4  20  21  22  23
M  SBL   2  1   5
M  SMT   2 ^CF3
M  SBV   2   5    0.7141   -0.4125
M  END
