# Supplementary material for: Controlling Pd(iv) reductive elimination pathways enables Pd(ii)-catalysed enantioselective C(sp3)−H fluorination
Source: Springer Nature journal article supplement (doi:10.1038/s41557-018-0048-1), 2018-06-08
Supplement: 41557_2018_48_MOESM288_ESM.cif [file 41557_2018_48_MOESM288_ESM.cif]

data_Yu73
_audit_creation_date              2017-06-20
_audit_creation_method
;
Olex2 1.2-beta
(compiled 2017.03.28 svn.r3405 for OlexSys, GUI svn.r5337)
;
_shelx_SHELXL_version_number      '2016/6'
_publ_contact_author_address      ?
_publ_contact_author_email        ?
_publ_contact_author_id_orcid     ?
_publ_contact_author_name         ''
_publ_contact_author_phone        ?
_publ_section_references
;
Dolomanov, O.V., Bourhis, L.J., Gildea, R.J, Howard, J.A.K. & Puschmann, H.
 (2009), J. Appl. Cryst. 42, 339-341.

Sheldrick, G.M. (2015). Acta Cryst. A71, 3-8.

Sheldrick, G.M. (2015). Acta Cryst. C71, 3-8.
;
_chemical_name_common             ?
_chemical_name_systematic         ?
_chemical_formula_moiety          'C18 H15 Br F3 N O3'
_chemical_formula_sum             'C18 H15 Br F3 N O3'
_chemical_formula_weight          430.22
_chemical_absolute_configuration  ad
_chemical_melting_point           ?
loop_
  _atom_type_symbol
  _atom_type_description
  _atom_type_scat_dispersion_real
  _atom_type_scat_dispersion_imag
  _atom_type_scat_source
 'C' 'C' 0.0033 0.0016 'International Tables Vol C Tables 4.2.6.8 and 6.1.1.4'
 'H' 'H' 0.0000 0.0000 'International Tables Vol C Tables 4.2.6.8 and 6.1.1.4'
 'Br' 'Br' -0.2901 2.4595
 'International Tables Vol C Tables 4.2.6.8 and 6.1.1.4'
 'F' 'F' 0.0171 0.0103 'International Tables Vol C Tables 4.2.6.8 and 6.1.1.4'
 'N' 'N' 0.0061 0.0033 'International Tables Vol C Tables 4.2.6.8 and 6.1.1.4'
 'O' 'O' 0.0106 0.0060 'International Tables Vol C Tables 4.2.6.8 and 6.1.1.4'

_shelx_space_group_comment
;
The symmetry employed for this shelxl refinement is uniquely defined
by the following loop, which should always be used as a source of
symmetry information in preference to the above space-group names.
They are only intended as comments.
;
_space_group_crystal_system       'monoclinic'
_space_group_IT_number            4
_space_group_name_H-M_alt         'P 1 21 1'
_space_group_name_Hall            'P 2yb'
loop_
  _space_group_symop_operation_xyz
 'x, y, z'
 '-x, y+1/2, -z'

_cell_length_a                    8.3942(8)
_cell_length_b                    15.6617(16)
_cell_length_c                    27.270(3)
_cell_angle_alpha                 90
_cell_angle_beta                  98.797(3)
_cell_angle_gamma                 90
_cell_volume                      3542.9(6)
_cell_formula_units_Z             8
_cell_measurement_reflns_used     8287
_cell_measurement_temperature     100.0
_cell_measurement_theta_max       25.373
_cell_measurement_theta_min       2.601
_shelx_estimated_absorpt_T_max    0.961
_shelx_estimated_absorpt_T_min    0.740
_exptl_absorpt_coefficient_mu     2.368
_exptl_absorpt_correction_T_max   0.0435
_exptl_absorpt_correction_T_min   0.0250
_exptl_absorpt_correction_type    multi-scan
_exptl_absorpt_process_details
'SADABS-2014/5 (Bruker,2014/5) was used for absorption correction. wR2(int) was 0.0953 before and 0.0656 after correction. The Ratio of minimum to maximum transmission is 0.5721. The \l/2 correction factor is Not present.'
_exptl_absorpt_special_details    ?
_exptl_crystal_colour             Colorless
_exptl_crystal_colour_primary     Colorless
_exptl_crystal_density_diffrn     1.613
_exptl_crystal_density_meas       ?
_exptl_crystal_density_method     ?
_exptl_crystal_description        Needle
_exptl_crystal_F_000              1728
_exptl_crystal_size_max           0.135
_exptl_crystal_size_mid           0.021
_exptl_crystal_size_min           0.017
_exptl_transmission_factor_max    ?
_exptl_transmission_factor_min    ?
_diffrn_reflns_av_R_equivalents   0.0542
_diffrn_reflns_av_unetI/netI      0.0612
_diffrn_reflns_Laue_measured_fraction_full 1.000
_diffrn_reflns_Laue_measured_fraction_max 0.997
_diffrn_reflns_limit_h_max        9
_diffrn_reflns_limit_h_min        -10
_diffrn_reflns_limit_k_max        18
_diffrn_reflns_limit_k_min        -18
_diffrn_reflns_limit_l_max        32
_diffrn_reflns_limit_l_min        -30
_diffrn_reflns_number             57638
_diffrn_reflns_point_group_measured_fraction_full 1.000
_diffrn_reflns_point_group_measured_fraction_max 0.997
_diffrn_reflns_theta_full         25.000
_diffrn_reflns_theta_max          25.453
_diffrn_reflns_theta_min          1.300
_diffrn_ambient_temperature       100.0
_diffrn_detector                  'Bruker APEX-II CCD'
_diffrn_detector_area_resol_mean  8.258
_diffrn_detector_type             'CCD Area Detector'
_diffrn_measured_fraction_theta_full 1.000
_diffrn_measured_fraction_theta_max 0.997
_diffrn_measurement_device        'Kappa Four-Circle Diffractometer'
_diffrn_measurement_device_type   'Bruker APEX II Ultra'
_diffrn_measurement_method        '\w and \f scans'
_diffrn_radiation_monochromator   'Double Bounce Multilayer Mirrors'
_diffrn_radiation_probe           X-ray
_diffrn_radiation_type            MoK\a
_diffrn_radiation_wavelength      0.71073
_diffrn_radiation_xray_symbol     K-L~3~
_diffrn_source                    'Micro Focus Rotating Anode'
_diffrn_source_type               'Bruker TXS'
_diffrn_special_details           ?
_diffrn_standards_number          0
_reflns_Friedel_coverage          0.923
_reflns_Friedel_fraction_full     1.000
_reflns_Friedel_fraction_max      0.997
_reflns_number_gt                 10657
_reflns_number_total              13034
_reflns_special_details
;
 Reflections were merged by SHELXL according to the crystal
 class for the calculation of statistics and refinement.
 
 _reflns_Friedel_fraction is defined as the number of unique
 Friedel pairs measured divided by the number that would be
 possible theoretically, ignoring centric projections and
 systematic absences.
;
_reflns_threshold_expression      'I > 2\s(I)'
_computing_cell_refinement        'SAINT v8.37A (Bruker, 2016)'
_computing_data_collection        'APEX3 v2016.1-0 (Bruker, 2016)'
_computing_data_reduction         'SAINT v8.37A (Bruker, 2016)'
_computing_molecular_graphics     'Olex2 (Dolomanov et al., 2009)'
_computing_publication_material   'Olex2 (Dolomanov et al., 2009)'
_computing_structure_refinement   'ShelXL (Sheldrick, 2015)'
_computing_structure_solution     'ShelXT (Sheldrick, 2015)'
_refine_diff_density_max          1.458
_refine_diff_density_min          -0.506
_refine_diff_density_rms          0.126
_refine_ls_abs_structure_details
;
 Flack x determined using 4065 quotients [(I+)-(I-)]/[(I+)+(I-)]
 (Parsons, Flack and Wagner, Acta Cryst. B69 (2013) 249-259).
;
_refine_ls_abs_structure_Flack    0.015(4)
_refine_ls_extinction_coef        .
_refine_ls_extinction_method      none
_refine_ls_goodness_of_fit_ref    1.020
_refine_ls_hydrogen_treatment     constr
_refine_ls_matrix_type            full
_refine_ls_number_parameters      982
_refine_ls_number_reflns          13034
_refine_ls_number_restraints      85
_refine_ls_R_factor_all           0.0788
_refine_ls_R_factor_gt            0.0630
_refine_ls_restrained_S_all       1.025
_refine_ls_shift/su_max           0.000
_refine_ls_shift/su_mean          0.000
_refine_ls_structure_factor_coef  Fsqd
_refine_ls_weighting_details
'w=1/[\s^2^(Fo^2^)+(0.1062P)^2^] where P=(Fo^2^+2Fc^2^)/3'
_refine_ls_weighting_scheme       calc
_refine_ls_wR_factor_gt           0.1511
_refine_ls_wR_factor_ref          0.1630
_refine_special_details
;
 Refined as a 2-component twin.
;
_olex2_refinement_description
;
1. Twinned data refinement
 Scales: 0.799(2)
 0.201(2)
2. Fixed Uiso
 At 1.2 times of:
  All C(H) groups, All N(H) groups
 At 1.5 times of:
  All C(H,H,H) groups
3. Restrained distances
 F1C-C10C = F1CC-C10C = F3C-C10C = F2CC-C10C = F2C-C10C = F3CC-C10C = F2AA-
 C10A = F1A-C10A = F1AA-C10A = F3A-C10A = F3AA-C10A = F2A-C10A
 1.35 with sigma of 0.02
4. Uiso/Uaniso restraints and constraints
Uanis(F2AA) = Uanis(F2A)
Uanis(F1A) = Uanis(F1AA)
Uanis(F3A) = Uanis(F3AA)
Uanis(F3C) = Uanis(F3CC)
Uanis(F1CC) = Uanis(F1C)
Uanis(F2CC) = Uanis(F2C)
Uanis(Br1E) = Uanis(Br1)
Uanis(Br1A) = Uanis(Br1F)
Uanis(Br1H) = Uanis(Br1C)
Uanis(Br1B) = Uanis(Br1G)
5. Rigid body (RIGU) restrains
 F1A, F1AA, F2A, F2AA, F3A, F3AA, C10A
 with sigma for 1-2 distances of 0.002 and sigma for 1-3 distances of 0.002
 F1C, F1CC, F2C, F2CC, F3C, F3CC, C10C
 with sigma for 1-2 distances of 0.002 and sigma for 1-3 distances of 0.002
6. Others
 Sof(F1AA)=Sof(F2AA)=Sof(F3AA)=1-FVAR(1)
 Sof(F1A)=Sof(F2A)=Sof(F3A)=FVAR(1)
 Sof(F1CC)=Sof(F2CC)=Sof(F3CC)=1-FVAR(2)
 Sof(F1C)=Sof(F2C)=Sof(F3C)=FVAR(2)
 Sof(Br1H)=1-FVAR(3)
 Sof(Br1C)=FVAR(3)
 Sof(Br1G)=1-FVAR(4)
 Sof(Br1B)=FVAR(4)
 Sof(Br1F)=1-FVAR(5)
 Sof(Br1A)=FVAR(5)
 Sof(Br1E)=1-FVAR(6)
 Sof(Br1)=FVAR(6)
7.a Ternary CH refined with riding coordinates:
 C8(H8), C8A(H8A), C8B(H8B), C8C(H8C)
7.b Aromatic/amide H refined with riding coordinates:
 N1(H1), C3(H3), C5(H5), C6(H6), C14(H14), C15(H15), C17(H17), C18(H18),
 N1A(H1A), C3A(H3A), C5A(H5A), C6A(H6A), C14A(H14A), C15A(H15A), C17A(H17A),
 C18A(H18A), N1B(H1B), C3B(H3B), C5B(H5B), C6B(H6B), C14B(H14B), C15B(H15B),
 C17B(H17B), C18B(H18B), N1C(H1C), C3C(H3C), C5C(H5C), C6C(H6C), C14C(H14C),
 C15C(H15C), C17C(H17C), C18C(H18C)
7.c Idealised Me refined as rotating group:
 C9(H9A,H9B,H9C), C12(H12G,H12H,H12I), C9A(H9AA,H9AB,H9AC), C12A(H12A,H12B,
 H12C), C9B(H9BA,H9BB,H9BC), C12B(H12J,H12K,H12L), C9C(H9CA,H9CB,H9CC),
 C12C(H12D,H12E,H12F)
;
_atom_sites_solution_hydrogens    geom
_atom_sites_solution_primary      dual
_atom_sites_solution_secondary    difmap
loop_
  _atom_site_label
  _atom_site_type_symbol
  _atom_site_fract_x
  _atom_site_fract_y
  _atom_site_fract_z
  _atom_site_U_iso_or_equiv
  _atom_site_adp_type
  _atom_site_occupancy
  _atom_site_site_symmetry_order
  _atom_site_calc_flag
  _atom_site_refinement_flags_posn
  _atom_site_refinement_flags_adp
  _atom_site_refinement_flags_occupancy
  _atom_site_disorder_assembly
  _atom_site_disorder_group
 Br1 Br -0.1977(3) 0.3033(2) 0.8035(2) 0.0413(9) Uani 0.853(19) 1 d . . P A 1
 Br1E Br -0.186(2) 0.2890(13) 0.8206(10) 0.0413(9) Uani 0.147(19) 1 d . . P A
 2
 F1 F -0.2331(14) 1.0748(6) 0.9064(4) 0.080(3) Uani 1 1 d . . . . .
 F2 F -0.3276(12) 0.9807(6) 0.8537(4) 0.067(2) Uani 1 1 d . . . . .
 F3 F -0.0904(12) 1.0267(8) 0.8551(5) 0.092(4) Uani 1 1 d . . . . .
 O1 O -0.2518(12) 0.6587(7) 0.9593(4) 0.056(3) Uani 1 1 d . . . . .
 O2 O 0.1951(11) 0.7462(5) 1.0428(3) 0.040(2) Uani 1 1 d . . . . .
 O3 O 0.2461(11) 0.6887(7) 0.9700(3) 0.048(2) Uani 1 1 d . . . . .
 N1 N -0.1406(11) 0.6636(6) 0.8858(4) 0.032(2) Uani 1 1 d . . . . .
 H1 H -0.101924 0.700480 0.866347 0.038 Uiso 1 1 calc R . . . .
 C1 C -0.1767(14) 0.6957(9) 0.9301(4) 0.039(3) Uani 1 1 d . . . . .
 C2 C -0.1242(15) 0.7854(8) 0.9411(5) 0.041(3) Uani 1 1 d . . . . .
 C3 C -0.1706(19) 0.8486(9) 0.9069(5) 0.047(3) Uani 1 1 d . . . . .
 H3 H -0.226375 0.834279 0.874997 0.057 Uiso 1 1 calc R . . . .
 C4 C -0.1351(16) 0.9348(8) 0.9193(5) 0.040(3) Uani 1 1 d . . . . .
 C5 C -0.0431(16) 0.9542(9) 0.9647(6) 0.046(3) Uani 1 1 d . . . . .
 H5 H -0.018693 1.011990 0.973480 0.055 Uiso 1 1 calc R . . . .
 C6 C 0.0135(15) 0.8885(8) 0.9975(5) 0.039(3) Uani 1 1 d . . . . .
 H6 H 0.082790 0.901612 1.027496 0.046 Uiso 1 1 calc R . . . .
 C7 C -0.0296(15) 0.8057(9) 0.9870(5) 0.043(3) Uani 1 1 d . . . . .
 C8 C 0.0208(16) 0.7354(9) 1.0242(5) 0.044(3) Uani 1 1 d . . . . .
 H8 H -0.000805 0.677987 1.008535 0.053 Uiso 1 1 calc R . . . .
 C9 C -0.0589(18) 0.7435(10) 1.0694(5) 0.050(3) Uani 1 1 d . . . . .
 H9A H -0.025777 0.797195 1.086439 0.076 Uiso 1 1 calc GR . . . .
 H9B H -0.026930 0.695448 1.091774 0.076 Uiso 1 1 calc GR . . . .
 H9C H -0.176197 0.743199 1.059646 0.076 Uiso 1 1 calc GR . . . .
 C10 C -0.1976(16) 1.0014(10) 0.8850(5) 0.045(3) Uani 1 1 d . . . . .
 C11 C 0.2967(16) 0.7142(9) 1.0128(5) 0.045(3) Uani 1 1 d . . . . .
 C12 C 0.4679(16) 0.7157(9) 1.0370(5) 0.046(3) Uani 1 1 d . . . . .
 H12G H 0.484565 0.672504 1.063269 0.068 Uiso 1 1 calc GR . . . .
 H12H H 0.493947 0.772297 1.051423 0.068 Uiso 1 1 calc GR . . . .
 H12I H 0.538070 0.703430 1.012275 0.068 Uiso 1 1 calc GR . . . .
 C13 C -0.1583(15) 0.5776(9) 0.8679(5) 0.036(3) Uani 1 1 d . . . . .
 C14 C -0.2308(15) 0.5150(8) 0.8924(5) 0.034(3) Uani 1 1 d . . . . .
 H14 H -0.276323 0.528396 0.921340 0.041 Uiso 1 1 calc R . . . .
 C15 C -0.2359(16) 0.4334(9) 0.8744(5) 0.038(3) Uani 1 1 d . . . . .
 H15 H -0.278750 0.389226 0.892452 0.045 Uiso 1 1 calc R . . . .
 C16 C -0.1813(15) 0.4139(8) 0.8314(4) 0.034(3) Uani 1 1 d . . . . .
 C17 C -0.1102(15) 0.4780(9) 0.8055(5) 0.038(3) Uani 1 1 d . . . . .
 H17 H -0.070487 0.465527 0.775448 0.046 Uiso 1 1 calc R . . . .
 C18 C -0.1004(16) 0.5599(8) 0.8252(5) 0.038(3) Uani 1 1 d . . . . .
 H18 H -0.052471 0.604166 0.808625 0.046 Uiso 1 1 calc R . . . .
 Br1A Br 0.3288(8) 0.2852(3) 0.8235(4) 0.0419(12) Uani 0.81(4) 1 d . . P B 1
 Br1F Br 0.306(3) 0.2978(15) 0.8103(10) 0.0419(12) Uani 0.19(4) 1 d . . P B 2
 F1A F 0.485(2) 1.0324(7) 0.9883(5) 0.069(3) Uani 0.754(9) 1 d D U P C 1
 F1AA F 0.366(5) 1.0247(19) 0.9911(15) 0.069(3) Uani 0.246(9) 1 d D U P C 2
 F2A F 0.6193(14) 0.9160(8) 0.9992(4) 0.065(3) Uani 0.754(9) 1 d D U P C 1
 F2AA F 0.592(4) 1.002(3) 0.9838(14) 0.065(3) Uani 0.246(9) 1 d D U P C 2
 F3A F 0.3881(13) 0.9170(7) 1.0156(3) 0.051(2) Uani 0.754(9) 1 d D U P C 1
 F3AA F 0.513(4) 0.8779(17) 0.9994(10) 0.051(2) Uani 0.246(9) 1 d D U P C 2
 O1A O 0.5006(11) 0.7260(8) 0.8159(4) 0.058(3) Uani 1 1 d . . . . .
 O2A O 0.0627(9) 0.8707(5) 0.7665(3) 0.0386(19) Uani 1 1 d . . . . .
 O3A O -0.0022(11) 0.7709(6) 0.8189(3) 0.043(2) Uani 1 1 d . . . . .
 N1A N 0.3590(12) 0.6653(7) 0.8739(4) 0.036(2) Uani 1 1 d . . . . .
 H1A H 0.318612 0.678959 0.900801 0.043 Uiso 1 1 calc R . . . .
 C1A C 0.4204(17) 0.7299(8) 0.8493(5) 0.045(3) Uani 1 1 d . . . . .
 C2A C 0.3785(16) 0.8179(8) 0.8669(5) 0.040(3) Uani 1 1 d . . . . .
 C3A C 0.4296(19) 0.8440(9) 0.9158(5) 0.051(4) Uani 1 1 d . . . . .
 H3A H 0.483701 0.804886 0.939324 0.061 Uiso 1 1 calc R . . . .
 C4A C 0.4021(18) 0.9249(9) 0.9297(6) 0.047(3) Uani 1 1 d . . . . .
 C5A C 0.3149(17) 0.9823(10) 0.8970(6) 0.050(4) Uani 1 1 d . . . . .
 H5A H 0.300435 1.039291 0.907439 0.060 Uiso 1 1 calc R . . . .
 C6A C 0.249(2) 0.9575(10) 0.8498(6) 0.055(4) Uani 1 1 d . . . . .
 H6A H 0.178751 0.993735 0.828591 0.066 Uiso 1 1 calc R . . . .
 C7A C 0.2929(16) 0.8739(9) 0.8341(5) 0.041(3) Uani 1 1 d . . . . .
 C8A C 0.2337(15) 0.8451(9) 0.7810(5) 0.039(3) Uani 1 1 d . . . . .
 H8A H 0.244571 0.781784 0.778266 0.047 Uiso 1 1 calc R . . . .
 C9A C 0.3237(16) 0.8893(9) 0.7439(5) 0.044(3) Uani 1 1 d . . . . .
 H9AA H 0.288812 0.865730 0.710760 0.066 Uiso 1 1 calc GR . . . .
 H9AB H 0.439832 0.880152 0.753434 0.066 Uiso 1 1 calc GR . . . .
 H9AC H 0.300642 0.950689 0.743723 0.066 Uiso 1 1 calc GR . . . .
 C10A C 0.4636(17) 0.9511(9) 0.9807(5) 0.056(3) Uani 1 1 d D U . . .
 C11A C -0.0447(18) 0.8258(8) 0.7870(5) 0.047(3) Uani 1 1 d . . . . .
 C12A C -0.2161(16) 0.8499(10) 0.7660(6) 0.050(4) Uani 1 1 d . . . . .
 H12A H -0.290336 0.807035 0.775745 0.075 Uiso 1 1 calc GR . . . .
 H12B H -0.227581 0.852478 0.729725 0.075 Uiso 1 1 calc GR . . . .
 H12C H -0.241545 0.905883 0.778920 0.075 Uiso 1 1 calc GR . . . .
 C13A C 0.3540(16) 0.5768(9) 0.8600(5) 0.038(3) Uani 1 1 d . . . . .
 C14A C 0.4027(16) 0.5499(9) 0.8163(5) 0.040(3) Uani 1 1 d . . . . .
 H14A H 0.442369 0.589438 0.794681 0.047 Uiso 1 1 calc R . . . .
 C15A C 0.3916(16) 0.4622(9) 0.8049(5) 0.041(3) Uani 1 1 d . . . . .
 H15A H 0.424996 0.442196 0.775151 0.050 Uiso 1 1 calc R . . . .
 C16A C 0.3326(15) 0.4048(8) 0.8363(5) 0.033(3) Uani 1 1 d . . . . .
 C17A C 0.2909(16) 0.4328(8) 0.8806(5) 0.036(3) Uani 1 1 d . . . . .
 H17A H 0.258038 0.392917 0.903351 0.043 Uiso 1 1 calc R . . . .
 C18A C 0.2968(15) 0.5197(9) 0.8921(5) 0.037(3) Uani 1 1 d . . . . .
 H18A H 0.261827 0.539558 0.921561 0.044 Uiso 1 1 calc R . . . .
 Br1B Br -0.0052(5) 0.6950(3) 0.6944(5) 0.0410(12) Uani 0.81(4) 1 d . . P D 1
 Br1G Br 0.000(2) 0.6999(14) 0.6805(12) 0.0410(12) Uani 0.19(4) 1 d . . P D 2
 F1B F -0.1443(14) -0.0771(6) 0.5945(4) 0.077(3) Uani 1 1 d . . . . .
 F2B F -0.1577(14) 0.0148(6) 0.6518(4) 0.079(3) Uani 1 1 d . . . . .
 F3B F 0.0655(12) -0.0369(8) 0.6438(5) 0.099(4) Uani 1 1 d . . . . .
 O1B O -0.2086(12) 0.3345(7) 0.5420(4) 0.056(3) Uani 1 1 d . . . . .
 O2B O 0.1564(11) 0.2489(6) 0.4577(3) 0.044(2) Uani 1 1 d . . . . .
 O3B O 0.2815(11) 0.3086(7) 0.5306(4) 0.051(2) Uani 1 1 d . . . . .
 N1B N -0.0173(12) 0.3324(7) 0.6153(4) 0.034(2) Uani 1 1 d . . . . .
 H1B H 0.044707 0.296743 0.634542 0.041 Uiso 1 1 calc R . . . .
 C1B C -0.1028(16) 0.2991(8) 0.5717(5) 0.043(3) Uani 1 1 d . . . . .
 C2B C -0.0558(14) 0.2080(10) 0.5614(5) 0.043(3) Uani 1 1 d . . . . .
 C3B C -0.0722(18) 0.1438(9) 0.5943(5) 0.046(3) Uani 1 1 d . . . . .
 H3B H -0.100194 0.157370 0.625850 0.055 Uiso 1 1 calc R . . . .
 C4B C -0.0489(15) 0.0607(9) 0.5825(6) 0.041(3) Uani 1 1 d . . . . .
 C5B C -0.0007(16) 0.0417(9) 0.5357(6) 0.048(4) Uani 1 1 d . . . . .
 H5B H 0.015948 -0.015916 0.526912 0.058 Uiso 1 1 calc R . . . .
 C6B C 0.021(2) 0.1039(9) 0.5046(6) 0.059(4) Uani 1 1 d . . . . .
 H6B H 0.058575 0.090439 0.474449 0.070 Uiso 1 1 calc R . . . .
 C7B C -0.0115(14) 0.1903(8) 0.5153(5) 0.041(3) Uani 1 1 d . . . . .
 C8B C 0.0000(15) 0.2591(8) 0.4765(5) 0.040(3) Uani 1 1 d . . . . .
 H8B H -0.005183 0.316898 0.491846 0.048 Uiso 1 1 calc R . . . .
 C9B C -0.1264(15) 0.2518(11) 0.4319(6) 0.058(4) Uani 1 1 d . . . . .
 H9BA H -0.108753 0.295706 0.407706 0.087 Uiso 1 1 calc GR . . . .
 H9BB H -0.233023 0.259730 0.441706 0.087 Uiso 1 1 calc GR . . . .
 H9BC H -0.120580 0.195173 0.417012 0.087 Uiso 1 1 calc GR . . . .
 C10B C -0.0752(16) -0.0045(10) 0.6167(6) 0.053(4) Uani 1 1 d . . . . .
 C11B C 0.2898(14) 0.2784(8) 0.4870(5) 0.043(3) Uani 1 1 d . . . . .
 C12B C 0.4300(18) 0.2763(10) 0.4603(6) 0.055(4) Uani 1 1 d . . . . .
 H12J H 0.410122 0.235090 0.433009 0.083 Uiso 1 1 calc GR . . . .
 H12K H 0.526282 0.259336 0.483215 0.083 Uiso 1 1 calc GR . . . .
 H12L H 0.446671 0.333154 0.446908 0.083 Uiso 1 1 calc GR . . . .
 C13B C -0.0202(14) 0.4169(8) 0.6315(4) 0.028(3) Uani 1 1 d . . . . .
 C14B C -0.1176(15) 0.4790(8) 0.6075(5) 0.034(3) Uani 1 1 d . . . . .
 H14B H -0.188069 0.464531 0.578022 0.041 Uiso 1 1 calc R . . . .
 C15B C -0.1164(16) 0.5625(9) 0.6249(5) 0.038(3) Uani 1 1 d . . . . .
 H15B H -0.185372 0.604838 0.608195 0.045 Uiso 1 1 calc R . . . .
 C16B C -0.0102(16) 0.5815(9) 0.6679(5) 0.039(3) Uani 1 1 d . . . . .
 C17B C 0.0865(15) 0.5214(8) 0.6936(4) 0.035(3) Uani 1 1 d . . . . .
 H17B H 0.156602 0.536420 0.723030 0.042 Uiso 1 1 calc R . . . .
 C18B C 0.0812(16) 0.4396(8) 0.6765(5) 0.037(3) Uani 1 1 d . . . . .
 H18B H 0.145859 0.397131 0.694741 0.044 Uiso 1 1 calc R . . . .
 Br1C Br 0.4836(6) 0.7069(4) 0.6795(4) 0.0428(12) Uani 0.83(4) 1 d . . P E 1
 Br1H Br 0.500(3) 0.6935(15) 0.6929(12) 0.0428(12) Uani 0.17(4) 1 d . . P E 2
 F1C F 0.511(2) -0.0371(7) 0.5091(5) 0.065(3) Uani 0.702(14) 1 d D U P F 1
 F1CC F 0.399(4) -0.0326(16) 0.5043(13) 0.065(3) Uani 0.298(14) 1 d D U P F 2
 F2C F 0.6229(15) 0.0820(9) 0.4985(5) 0.056(3) Uani 0.702(14) 1 d D U P F 1
 F2CC F 0.633(3) 0.032(2) 0.5075(11) 0.056(3) Uani 0.298(14) 1 d D U P F 2
 F3C F 0.3676(18) 0.0727(12) 0.4830(8) 0.055(3) Uani 0.702(14) 1 d D U P F 1
 F3CC F 0.405(5) 0.095(3) 0.482(2) 0.055(3) Uani 0.298(14) 1 d D U P F 2
 O1C O 0.7031(10) 0.2723(6) 0.6808(3) 0.0378(19) Uani 1 1 d . . . . .
 O2C O 0.3171(10) 0.1256(6) 0.7330(3) 0.040(2) Uani 1 1 d . . . . .
 O3C O 0.2004(11) 0.2332(8) 0.6842(3) 0.053(3) Uani 1 1 d . . . . .
 N1C N 0.4932(12) 0.3317(6) 0.6254(4) 0.033(2) Uani 1 1 d . . . . .
 H1C H 0.423221 0.318462 0.599041 0.040 Uiso 1 1 calc R . . . .
 C1C C 0.5841(16) 0.2662(8) 0.6481(5) 0.042(3) Uani 1 1 d . . . . .
 C2C C 0.5232(14) 0.1794(7) 0.6301(4) 0.033(3) Uani 1 1 d . . . . .
 C3C C 0.5262(16) 0.1548(8) 0.5819(5) 0.041(3) Uani 1 1 d . . . . .
 H3C H 0.559481 0.193686 0.558716 0.049 Uiso 1 1 calc R . . . .
 C4C C 0.4786(19) 0.0698(9) 0.5671(5) 0.048(4) Uani 1 1 d . . . . .
 C5C C 0.4264(17) 0.0137(10) 0.6007(6) 0.049(4) Uani 1 1 d . . . . .
 H5C H 0.392666 -0.042426 0.590920 0.059 Uiso 1 1 calc R . . . .
 C6C C 0.4244(17) 0.0416(8) 0.6495(5) 0.046(3) Uani 1 1 d . . . . .
 H6C H 0.388540 0.003855 0.672808 0.055 Uiso 1 1 calc R . . . .
 C7C C 0.4737(14) 0.1230(8) 0.6643(5) 0.036(3) Uani 1 1 d . . . . .
 C8C C 0.4720(17) 0.1480(8) 0.7195(5) 0.041(3) Uani 1 1 d . . . . .
 H8C H 0.486870 0.211214 0.722922 0.049 Uiso 1 1 calc R . . . .
 C9C C 0.5985(17) 0.1051(9) 0.7549(5) 0.050(3) Uani 1 1 d . . . . .
 H9CA H 0.581584 0.043212 0.753245 0.075 Uiso 1 1 calc GR . . . .
 H9CB H 0.592697 0.125146 0.788671 0.075 Uiso 1 1 calc GR . . . .
 H9CC H 0.704808 0.118653 0.746336 0.075 Uiso 1 1 calc GR . . . .
 C10C C 0.4909(16) 0.0449(8) 0.5160(5) 0.048(2) Uani 1 1 d D U . . .
 C11C C 0.1896(17) 0.1718(8) 0.7144(5) 0.042(3) Uani 1 1 d . . . . .
 C12C C 0.0386(18) 0.1495(9) 0.7338(6) 0.051(4) Uani 1 1 d . . . . .
 H12D H 0.027321 0.186353 0.762148 0.076 Uiso 1 1 calc GR . . . .
 H12E H 0.043068 0.089706 0.744450 0.076 Uiso 1 1 calc GR . . . .
 H12F H -0.053960 0.157921 0.707666 0.076 Uiso 1 1 calc GR . . . .
 C13C C 0.5004(16) 0.4167(8) 0.6396(5) 0.034(3) Uani 1 1 d . . . . .
 C14C C 0.5883(15) 0.4465(8) 0.6839(4) 0.035(3) Uani 1 1 d . . . . .
 H14C H 0.650436 0.408166 0.706123 0.042 Uiso 1 1 calc R . . . .
 C15C C 0.5835(16) 0.5326(8) 0.6950(5) 0.037(3) Uani 1 1 d . . . . .
 H15C H 0.643306 0.553306 0.725039 0.045 Uiso 1 1 calc R . . . .
 C16C C 0.4949(15) 0.5876(8) 0.6637(5) 0.035(3) Uani 1 1 d . . . . .
 C17C C 0.4037(16) 0.5606(9) 0.6200(5) 0.041(3) Uani 1 1 d . . . . .
 H17C H 0.338944 0.600117 0.599378 0.049 Uiso 1 1 calc R . . . .
 C18C C 0.4069(16) 0.4756(8) 0.6065(5) 0.036(3) Uani 1 1 d . . . . .
 H18C H 0.348325 0.456467 0.575940 0.043 Uiso 1 1 calc R . . . .

loop_
  _atom_site_aniso_label
  _atom_site_aniso_U_11
  _atom_site_aniso_U_22
  _atom_site_aniso_U_33
  _atom_site_aniso_U_23
  _atom_site_aniso_U_13
  _atom_site_aniso_U_12
 Br1 0.0551(9) 0.0333(10) 0.033(2) -0.0067(13) -0.0009(11) -0.0020(8)
 Br1E 0.0551(9) 0.0333(10) 0.033(2) -0.0067(13) -0.0009(11) -0.0020(8)
 F1 0.125(9) 0.052(5) 0.059(6) -0.007(4) -0.001(6) 0.036(5)
 F2 0.071(6) 0.056(5) 0.067(6) 0.011(4) -0.012(5) 0.002(4)
 F3 0.069(6) 0.108(9) 0.104(9) 0.053(7) 0.033(6) 0.026(6)
 O1 0.057(6) 0.068(7) 0.045(6) 0.004(5) 0.015(5) -0.020(5)
 O2 0.052(5) 0.035(4) 0.034(5) -0.002(4) 0.007(4) 0.004(4)
 O3 0.050(5) 0.056(6) 0.034(5) 0.001(4) -0.001(4) 0.004(5)
 N1 0.029(5) 0.024(5) 0.042(6) 0.000(4) 0.005(4) 0.002(4)
 C1 0.034(6) 0.045(7) 0.036(6) 0.003(6) -0.002(6) -0.001(6)
 C2 0.051(7) 0.028(6) 0.044(7) 0.006(5) 0.012(6) 0.000(6)
 C3 0.070(10) 0.040(7) 0.032(7) -0.002(6) 0.009(7) -0.002(7)
 C4 0.047(8) 0.031(7) 0.045(8) -0.013(6) 0.018(6) -0.011(6)
 C5 0.042(8) 0.034(6) 0.063(10) -0.002(6) 0.013(7) -0.001(6)
 C6 0.036(7) 0.044(7) 0.034(7) 0.004(5) 0.000(5) 0.006(5)
 C7 0.042(7) 0.048(7) 0.040(7) -0.004(6) 0.008(6) 0.009(6)
 C8 0.047(8) 0.036(7) 0.046(8) 0.002(6) -0.001(6) 0.003(6)
 C9 0.061(9) 0.056(8) 0.034(7) 0.000(6) 0.008(6) 0.002(6)
 C10 0.035(7) 0.055(8) 0.044(8) -0.015(7) 0.008(7) 0.001(6)
 C11 0.053(8) 0.041(7) 0.046(8) 0.012(6) 0.022(6) 0.005(6)
 C12 0.042(7) 0.043(7) 0.049(8) 0.004(6) 0.000(6) 0.015(6)
 C13 0.029(7) 0.040(7) 0.036(7) 0.001(6) -0.004(5) -0.003(5)
 C14 0.034(7) 0.028(6) 0.039(7) -0.003(5) 0.003(5) 0.003(5)
 C15 0.040(7) 0.039(7) 0.032(7) 0.004(6) -0.006(6) -0.012(6)
 C16 0.038(7) 0.032(6) 0.026(6) 0.000(5) -0.008(5) 0.000(5)
 C17 0.034(7) 0.049(7) 0.032(7) 0.003(6) 0.008(5) 0.001(6)
 C18 0.043(7) 0.035(7) 0.035(7) -0.001(5) 0.001(6) -0.006(5)
 Br1A 0.0547(15) 0.0310(14) 0.039(3) -0.0040(16) 0.0030(18) -0.0008(12)
 Br1F 0.0547(15) 0.0310(14) 0.039(3) -0.0040(16) 0.0030(18) -0.0008(12)
 F1A 0.098(8) 0.054(4) 0.055(7) -0.004(4) 0.011(7) -0.017(5)
 F1AA 0.098(8) 0.054(4) 0.055(7) -0.004(4) 0.011(7) -0.017(5)
 F2A 0.066(5) 0.081(6) 0.046(6) -0.016(5) 0.002(5) -0.022(4)
 F2AA 0.066(5) 0.081(6) 0.046(6) -0.016(5) 0.002(5) -0.022(4)
 F3A 0.068(6) 0.062(5) 0.024(4) -0.007(4) 0.005(4) -0.017(4)
 F3AA 0.068(6) 0.062(5) 0.024(4) -0.007(4) 0.005(4) -0.017(4)
 O1A 0.044(5) 0.094(9) 0.040(5) -0.001(5) 0.017(4) -0.009(5)
 O2A 0.039(5) 0.037(4) 0.042(5) 0.006(4) 0.010(4) -0.003(4)
 O3A 0.059(5) 0.036(4) 0.036(5) 0.003(4) 0.009(4) -0.002(4)
 N1A 0.039(6) 0.029(5) 0.040(6) -0.002(4) 0.008(5) -0.004(4)
 C1A 0.060(9) 0.039(7) 0.032(7) -0.004(5) -0.005(6) -0.003(6)
 C2A 0.044(7) 0.042(7) 0.033(7) -0.007(5) 0.000(6) -0.008(6)
 C3A 0.080(10) 0.036(7) 0.042(8) 0.004(6) 0.023(7) -0.008(7)
 C4A 0.060(9) 0.035(7) 0.049(8) -0.003(6) 0.024(7) -0.002(6)
 C5A 0.049(8) 0.051(9) 0.054(9) -0.033(7) 0.019(7) -0.010(7)
 C6A 0.071(10) 0.051(8) 0.047(8) -0.009(7) 0.021(8) -0.036(8)
 C7A 0.050(8) 0.037(6) 0.033(7) 0.004(5) -0.003(6) -0.002(6)
 C8A 0.038(7) 0.041(7) 0.036(7) 0.003(5) -0.005(6) 0.004(6)
 C9A 0.044(7) 0.048(7) 0.040(7) -0.005(6) 0.006(6) 0.001(6)
 C10A 0.066(6) 0.058(5) 0.046(7) -0.007(4) 0.013(5) -0.021(4)
 C11A 0.072(9) 0.038(7) 0.031(7) -0.009(6) 0.012(7) -0.008(6)
 C12A 0.036(7) 0.055(9) 0.052(9) -0.009(7) -0.017(7) 0.005(6)
 C13A 0.035(7) 0.036(7) 0.040(8) 0.004(6) 0.001(6) -0.001(5)
 C14A 0.039(7) 0.043(7) 0.037(7) 0.008(6) 0.009(6) -0.004(6)
 C15A 0.047(8) 0.051(8) 0.025(6) -0.007(5) 0.003(6) -0.002(6)
 C16A 0.038(7) 0.024(6) 0.035(7) -0.002(5) 0.000(5) -0.005(5)
 C17A 0.048(8) 0.024(6) 0.035(7) 0.014(5) 0.000(6) 0.000(5)
 C18A 0.039(7) 0.037(7) 0.034(7) -0.004(6) 0.006(6) 0.007(6)
 Br1B 0.0533(9) 0.0367(9) 0.034(3) -0.0100(15) 0.0084(14) 0.0016(7)
 Br1G 0.0533(9) 0.0367(9) 0.034(3) -0.0100(15) 0.0084(14) 0.0016(7)
 F1B 0.111(8) 0.053(5) 0.066(6) 0.003(4) 0.014(6) -0.026(5)
 F2B 0.116(9) 0.064(6) 0.065(6) 0.003(5) 0.037(6) 0.015(6)
 F3B 0.058(6) 0.120(9) 0.112(9) 0.062(8) -0.011(6) -0.016(6)
 O1B 0.049(5) 0.060(6) 0.054(6) 0.002(5) -0.009(5) 0.031(5)
 O2B 0.048(5) 0.047(5) 0.036(5) -0.005(4) 0.001(4) -0.013(4)
 O3B 0.047(5) 0.053(5) 0.048(6) 0.004(5) -0.007(4) -0.003(4)
 N1B 0.034(5) 0.033(6) 0.033(6) 0.000(4) 0.001(4) 0.003(4)
 C1B 0.046(7) 0.041(7) 0.046(7) 0.002(6) 0.018(6) 0.001(6)
 C2B 0.033(6) 0.058(8) 0.039(7) -0.011(7) 0.006(5) -0.011(6)
 C3B 0.063(9) 0.045(8) 0.026(7) 0.000(6) -0.003(6) 0.002(7)
 C4B 0.033(7) 0.037(7) 0.053(9) -0.003(6) 0.004(6) -0.001(5)
 C5B 0.040(8) 0.036(7) 0.073(10) -0.012(7) 0.021(7) -0.007(6)
 C6B 0.088(12) 0.034(7) 0.054(9) -0.006(6) 0.010(8) -0.008(7)
 C7B 0.036(6) 0.041(7) 0.048(8) -0.004(6) 0.011(6) -0.002(5)
 C8B 0.042(7) 0.037(7) 0.041(7) 0.002(5) 0.007(6) -0.003(5)
 C9B 0.033(8) 0.077(11) 0.066(10) 0.013(8) 0.017(7) 0.005(7)
 C10B 0.026(7) 0.060(9) 0.073(11) -0.021(8) 0.008(7) -0.013(6)
 C11B 0.039(7) 0.034(6) 0.056(8) 0.007(6) 0.003(6) -0.011(5)
 C12B 0.056(8) 0.056(9) 0.060(9) 0.001(7) 0.029(7) -0.012(7)
 C13B 0.028(6) 0.037(7) 0.019(6) 0.001(5) 0.005(5) 0.002(5)
 C14B 0.039(7) 0.034(6) 0.029(7) 0.001(5) 0.005(5) 0.000(5)
 C15B 0.037(7) 0.040(7) 0.032(7) 0.004(6) -0.006(6) -0.003(5)
 C16B 0.046(8) 0.032(7) 0.040(7) -0.015(6) 0.014(6) 0.001(5)
 C17B 0.038(7) 0.046(7) 0.018(6) 0.003(5) -0.003(5) 0.002(6)
 C18B 0.039(7) 0.039(7) 0.034(7) 0.009(5) 0.008(6) 0.010(5)
 Br1C 0.0531(11) 0.0332(14) 0.039(3) -0.0060(18) -0.0019(15) 0.0049(10)
 Br1H 0.0531(11) 0.0332(14) 0.039(3) -0.0060(18) -0.0019(15) 0.0049(10)
 F1C 0.101(8) 0.041(4) 0.051(7) -0.014(4) 0.008(8) 0.002(5)
 F1CC 0.101(8) 0.041(4) 0.051(7) -0.014(4) 0.008(8) 0.002(5)
 F2C 0.065(5) 0.068(7) 0.036(6) -0.006(6) 0.009(4) 0.006(5)
 F2CC 0.065(5) 0.068(7) 0.036(6) -0.006(6) 0.009(4) 0.006(5)
 F3C 0.062(7) 0.063(9) 0.039(4) 0.002(7) 0.000(7) 0.003(6)
 F3CC 0.062(7) 0.063(9) 0.039(4) 0.002(7) 0.000(7) 0.003(6)
 O1C 0.037(5) 0.036(4) 0.037(5) 0.002(4) -0.006(4) 0.002(3)
 O2C 0.046(5) 0.039(4) 0.033(5) 0.004(4) 0.000(4) 0.007(4)
 O3C 0.044(5) 0.087(8) 0.029(5) 0.002(5) 0.006(4) 0.008(5)
 N1C 0.040(6) 0.028(5) 0.032(6) 0.006(4) 0.005(4) 0.001(4)
 C1C 0.051(8) 0.035(6) 0.044(7) 0.001(5) 0.021(7) -0.001(6)
 C2C 0.037(6) 0.031(6) 0.031(7) -0.006(5) 0.005(5) 0.006(5)
 C3C 0.046(7) 0.043(7) 0.031(7) 0.005(6) 0.001(6) -0.006(6)
 C4C 0.062(9) 0.036(7) 0.040(8) -0.004(6) -0.009(7) 0.012(6)
 C5C 0.046(8) 0.050(8) 0.049(9) -0.015(7) -0.001(7) 0.011(7)
 C6C 0.045(8) 0.036(6) 0.055(9) 0.009(6) 0.001(7) 0.003(6)
 C7C 0.034(6) 0.038(7) 0.035(7) 0.002(5) -0.001(5) 0.005(5)
 C8C 0.057(8) 0.027(6) 0.042(7) 0.002(5) 0.018(7) 0.007(6)
 C9C 0.049(8) 0.045(8) 0.053(9) 0.000(6) 0.000(7) 0.006(6)
 C10C 0.058(5) 0.040(4) 0.043(6) -0.006(4) 0.002(4) 0.006(4)
 C11C 0.055(8) 0.037(7) 0.036(7) 0.005(5) 0.009(6) 0.010(6)
 C12C 0.066(10) 0.046(8) 0.046(8) -0.008(7) 0.029(7) 0.000(7)
 C13C 0.051(8) 0.030(6) 0.027(6) -0.001(5) 0.021(6) -0.002(5)
 C14C 0.036(6) 0.044(7) 0.025(6) 0.012(5) 0.001(5) 0.005(5)
 C15C 0.046(7) 0.041(7) 0.025(6) -0.002(5) 0.007(5) 0.001(6)
 C16C 0.035(7) 0.034(7) 0.036(7) -0.007(6) 0.002(5) 0.005(5)
 C17C 0.037(7) 0.045(8) 0.039(8) -0.003(6) 0.001(6) 0.010(6)
 C18C 0.047(8) 0.026(6) 0.033(7) 0.004(5) 0.005(6) -0.003(5)

_geom_special_details
;
 All esds (except the esd in the dihedral angle between two l.s. planes)
 are estimated using the full covariance matrix.  The cell esds are taken
 into account individually in the estimation of esds in distances, angles
 and torsion angles; correlations between esds in cell parameters are only
 used when they are defined by crystal symmetry.  An approximate (isotropic)
 treatment of cell esds is used for estimating esds involving l.s. planes.
;
loop_
  _geom_bond_atom_site_label_1
  _geom_bond_atom_site_label_2
  _geom_bond_distance
  _geom_bond_site_symmetry_2
  _geom_bond_publ_flag
 Br1 C16 1.888(13) . ?
 Br1E C16 1.98(2) . ?
 F1 C10 1.343(16) . ?
 F2 C10 1.319(17) . ?
 F3 C10 1.363(17) . ?
 O1 C1 1.231(15) . ?
 O2 C8 1.482(16) . ?
 O2 C11 1.363(15) . ?
 O3 C11 1.246(16) . ?
 N1 H1 0.8800 . ?
 N1 C1 1.384(16) . ?
 N1 C13 1.433(17) . ?
 C1 C2 1.490(18) . ?
 C2 C3 1.374(18) . ?
 C2 C7 1.412(18) . ?
 C3 H3 0.9500 . ?
 C3 C4 1.412(18) . ?
 C4 C5 1.39(2) . ?
 C4 C10 1.45(2) . ?
 C5 H5 0.9500 . ?
 C5 C6 1.398(18) . ?
 C6 H6 0.9500 . ?
 C6 C7 1.366(19) . ?
 C7 C8 1.513(18) . ?
 C8 H8 1.0000 . ?
 C8 C9 1.495(19) . ?
 C9 H9A 0.9800 . ?
 C9 H9B 0.9800 . ?
 C9 H9C 0.9800 . ?
 C11 C12 1.487(19) . ?
 C12 H12G 0.9800 . ?
 C12 H12H 0.9800 . ?
 C12 H12I 0.9800 . ?
 C13 C14 1.380(18) . ?
 C13 C18 1.356(19) . ?
 C14 H14 0.9500 . ?
 C14 C15 1.368(18) . ?
 C15 H15 0.9500 . ?
 C15 C16 1.358(19) . ?
 C16 C17 1.412(18) . ?
 C17 H17 0.9500 . ?
 C17 C18 1.389(18) . ?
 C18 H18 0.9500 . ?
 Br1A C16A 1.904(13) . ?
 Br1F C16A 1.82(2) . ?
 F1A C10A 1.297(16) . ?
 F1AA C10A 1.46(2) . ?
 F2A C10A 1.437(17) . ?
 F2AA C10A 1.33(2) . ?
 F3A C10A 1.334(15) . ?
 F3AA C10A 1.30(2) . ?
 O1A C1A 1.215(17) . ?
 O2A C8A 1.485(14) . ?
 O2A C11A 1.332(16) . ?
 O3A C11A 1.236(16) . ?
 N1A H1A 0.8800 . ?
 N1A C1A 1.359(17) . ?
 N1A C13A 1.436(17) . ?
 C1A C2A 1.518(18) . ?
 C2A C3A 1.399(19) . ?
 C2A C7A 1.375(18) . ?
 C3A H3A 0.9500 . ?
 C3A C4A 1.353(19) . ?
 C4A C5A 1.39(2) . ?
 C4A C10A 1.47(2) . ?
 C5A H5A 0.9500 . ?
 C5A C6A 1.38(2) . ?
 C6A H6A 0.9500 . ?
 C6A C7A 1.44(2) . ?
 C7A C8A 1.525(18) . ?
 C8A H8A 1.0000 . ?
 C8A C9A 1.518(18) . ?
 C9A H9AA 0.9800 . ?
 C9A H9AB 0.9800 . ?
 C9A H9AC 0.9800 . ?
 C11A C12A 1.51(2) . ?
 C12A H12A 0.9800 . ?
 C12A H12B 0.9800 . ?
 C12A H12C 0.9800 . ?
 C13A C14A 1.38(2) . ?
 C13A C18A 1.386(19) . ?
 C14A H14A 0.9500 . ?
 C14A C15A 1.409(19) . ?
 C15A H15A 0.9500 . ?
 C15A C16A 1.387(18) . ?
 C16A C17A 1.380(19) . ?
 C17A H17A 0.9500 . ?
 C17A C18A 1.395(18) . ?
 C18A H18A 0.9500 . ?
 Br1B C16B 1.918(13) . ?
 Br1G C16B 1.89(2) . ?
 F1B C10B 1.375(17) . ?
 F2B C10B 1.301(18) . ?
 F3B C10B 1.390(19) . ?
 O1B C1B 1.237(16) . ?
 O2B C8B 1.490(15) . ?
 O2B C11B 1.354(15) . ?
 O3B C11B 1.291(17) . ?
 N1B H1B 0.8800 . ?
 N1B C1B 1.394(17) . ?
 N1B C13B 1.396(16) . ?
 C1B C2B 1.519(19) . ?
 C2B C3B 1.368(19) . ?
 C2B C7B 1.392(17) . ?
 C3B H3B 0.9500 . ?
 C3B C4B 1.362(19) . ?
 C4B C5B 1.43(2) . ?
 C4B C10B 1.42(2) . ?
 C5B H5B 0.9500 . ?
 C5B C6B 1.32(2) . ?
 C6B H6B 0.9500 . ?
 C6B C7B 1.419(18) . ?
 C7B C8B 1.524(17) . ?
 C8B H8B 1.0000 . ?
 C8B C9B 1.49(2) . ?
 C9B H9BA 0.9800 . ?
 C9B H9BB 0.9800 . ?
 C9B H9BC 0.9800 . ?
 C11B C12B 1.476(18) . ?
 C12B H12J 0.9800 . ?
 C12B H12K 0.9800 . ?
 C12B H12L 0.9800 . ?
 C13B C14B 1.371(18) . ?
 C13B C18B 1.427(18) . ?
 C14B H14B 0.9500 . ?
 C14B C15B 1.391(18) . ?
 C15B H15B 0.9500 . ?
 C15B C16B 1.391(19) . ?
 C16B C17B 1.364(19) . ?
 C17B H17B 0.9500 . ?
 C17B C18B 1.361(18) . ?
 C18B H18B 0.9500 . ?
 Br1C C16C 1.923(14) . ?
 Br1H C16C 1.84(2) . ?
 F1C C10C 1.312(15) . ?
 F1CC C10C 1.45(2) . ?
 F2C C10C 1.399(16) . ?
 F2CC C10C 1.27(2) . ?
 F3C C10C 1.337(18) . ?
 F3CC C10C 1.34(3) . ?
 O1C C1C 1.237(16) . ?
 O2C C8C 1.447(16) . ?
 O2C C11C 1.326(15) . ?
 O3C C11C 1.278(16) . ?
 N1C H1C 0.8800 . ?
 N1C C1C 1.369(16) . ?
 N1C C13C 1.386(16) . ?
 C1C C2C 1.508(17) . ?
 C2C C3C 1.375(17) . ?
 C2C C7C 1.392(17) . ?
 C3C H3C 0.9500 . ?
 C3C C4C 1.430(19) . ?
 C4C C5C 1.39(2) . ?
 C4C C10C 1.466(19) . ?
 C5C H5C 0.9500 . ?
 C5C C6C 1.40(2) . ?
 C6C H6C 0.9500 . ?
 C6C C7C 1.380(18) . ?
 C7C C8C 1.559(18) . ?
 C8C H8C 1.0000 . ?
 C8C C9C 1.483(19) . ?
 C9C H9CA 0.9800 . ?
 C9C H9CB 0.9800 . ?
 C9C H9CC 0.9800 . ?
 C11C C12C 1.488(19) . ?
 C12C H12D 0.9800 . ?
 C12C H12E 0.9800 . ?
 C12C H12F 0.9800 . ?
 C13C C14C 1.396(19) . ?
 C13C C18C 1.436(19) . ?
 C14C H14C 0.9500 . ?
 C14C C15C 1.384(18) . ?
 C15C H15C 0.9500 . ?
 C15C C16C 1.354(18) . ?
 C16C C17C 1.380(19) . ?
 C17C H17C 0.9500 . ?
 C17C C18C 1.382(18) . ?
 C18C H18C 0.9500 . ?

loop_
  _geom_angle_atom_site_label_1
  _geom_angle_atom_site_label_2
  _geom_angle_atom_site_label_3
  _geom_angle
  _geom_angle_site_symmetry_1
  _geom_angle_site_symmetry_3
  _geom_angle_publ_flag
 C11 O2 C8 115.4(10) . . ?
 C1 N1 H1 116.0 . . ?
 C1 N1 C13 127.9(11) . . ?
 C13 N1 H1 116.0 . . ?
 O1 C1 N1 126.5(12) . . ?
 O1 C1 C2 118.6(11) . . ?
 N1 C1 C2 114.8(10) . . ?
 C3 C2 C1 119.9(12) . . ?
 C3 C2 C7 120.2(12) . . ?
 C7 C2 C1 119.9(11) . . ?
 C2 C3 H3 120.1 . . ?
 C2 C3 C4 119.9(13) . . ?
 C4 C3 H3 120.1 . . ?
 C3 C4 C10 119.5(13) . . ?
 C5 C4 C3 119.4(13) . . ?
 C5 C4 C10 121.1(12) . . ?
 C4 C5 H5 120.1 . . ?
 C4 C5 C6 119.8(13) . . ?
 C6 C5 H5 120.1 . . ?
 C5 C6 H6 119.6 . . ?
 C7 C6 C5 120.8(13) . . ?
 C7 C6 H6 119.6 . . ?
 C2 C7 C8 119.6(12) . . ?
 C6 C7 C2 119.7(12) . . ?
 C6 C7 C8 120.8(12) . . ?
 O2 C8 C7 107.9(10) . . ?
 O2 C8 H8 110.7 . . ?
 O2 C8 C9 104.6(11) . . ?
 C7 C8 H8 110.7 . . ?
 C9 C8 C7 112.1(11) . . ?
 C9 C8 H8 110.7 . . ?
 C8 C9 H9A 109.5 . . ?
 C8 C9 H9B 109.5 . . ?
 C8 C9 H9C 109.5 . . ?
 H9A C9 H9B 109.5 . . ?
 H9A C9 H9C 109.5 . . ?
 H9B C9 H9C 109.5 . . ?
 F1 C10 F3 102.9(13) . . ?
 F1 C10 C4 114.8(12) . . ?
 F2 C10 F1 105.9(12) . . ?
 F2 C10 F3 103.9(12) . . ?
 F2 C10 C4 115.1(13) . . ?
 F3 C10 C4 112.9(11) . . ?
 O2 C11 C12 112.3(12) . . ?
 O3 C11 O2 121.6(12) . . ?
 O3 C11 C12 126.1(12) . . ?
 C11 C12 H12G 109.5 . . ?
 C11 C12 H12H 109.5 . . ?
 C11 C12 H12I 109.5 . . ?
 H12G C12 H12H 109.5 . . ?
 H12G C12 H12I 109.5 . . ?
 H12H C12 H12I 109.5 . . ?
 C14 C13 N1 122.1(12) . . ?
 C18 C13 N1 117.0(11) . . ?
 C18 C13 C14 120.9(13) . . ?
 C13 C14 H14 120.6 . . ?
 C15 C14 C13 118.8(12) . . ?
 C15 C14 H14 120.6 . . ?
 C14 C15 H15 119.2 . . ?
 C16 C15 C14 121.6(12) . . ?
 C16 C15 H15 119.2 . . ?
 C15 C16 Br1 122.7(10) . . ?
 C15 C16 Br1E 110.5(12) . . ?
 C15 C16 C17 119.9(12) . . ?
 C17 C16 Br1 117.4(10) . . ?
 C17 C16 Br1E 128.9(12) . . ?
 C16 C17 H17 121.1 . . ?
 C18 C17 C16 117.8(12) . . ?
 C18 C17 H17 121.1 . . ?
 C13 C18 C17 120.9(12) . . ?
 C13 C18 H18 119.5 . . ?
 C17 C18 H18 119.5 . . ?
 C11A O2A C8A 115.8(10) . . ?
 C1A N1A H1A 117.0 . . ?
 C1A N1A C13A 125.9(11) . . ?
 C13A N1A H1A 117.0 . . ?
 O1A C1A N1A 129.0(13) . . ?
 O1A C1A C2A 117.7(12) . . ?
 N1A C1A C2A 113.3(11) . . ?
 C3A C2A C1A 121.0(12) . . ?
 C7A C2A C1A 119.7(12) . . ?
 C7A C2A C3A 119.2(12) . . ?
 C2A C3A H3A 120.0 . . ?
 C4A C3A C2A 120.0(14) . . ?
 C4A C3A H3A 120.0 . . ?
 C3A C4A C5A 121.4(14) . . ?
 C3A C4A C10A 118.5(14) . . ?
 C5A C4A C10A 120.1(12) . . ?
 C4A C5A H5A 119.6 . . ?
 C6A C5A C4A 120.8(14) . . ?
 C6A C5A H5A 119.6 . . ?
 C5A C6A H6A 121.6 . . ?
 C5A C6A C7A 116.8(16) . . ?
 C7A C6A H6A 121.6 . . ?
 C2A C7A C6A 121.1(13) . . ?
 C2A C7A C8A 119.5(12) . . ?
 C6A C7A C8A 119.3(12) . . ?
 O2A C8A C7A 109.5(10) . . ?
 O2A C8A H8A 110.1 . . ?
 O2A C8A C9A 105.0(10) . . ?
 C7A C8A H8A 110.1 . . ?
 C9A C8A C7A 112.0(11) . . ?
 C9A C8A H8A 110.1 . . ?
 C8A C9A H9AA 109.5 . . ?
 C8A C9A H9AB 109.5 . . ?
 C8A C9A H9AC 109.5 . . ?
 H9AA C9A H9AB 109.5 . . ?
 H9AA C9A H9AC 109.5 . . ?
 H9AB C9A H9AC 109.5 . . ?
 F1A C10A F2A 103.0(13) . . ?
 F1A C10A F3A 110.4(13) . . ?
 F1A C10A C4A 116.5(13) . . ?
 F1AA C10A C4A 106(2) . . ?
 F2A C10A C4A 113.3(12) . . ?
 F2AA C10A F1AA 90(3) . . ?
 F2AA C10A C4A 113.0(19) . . ?
 F3A C10A F2A 95.9(11) . . ?
 F3A C10A C4A 115.4(12) . . ?
 F3AA C10A F1AA 141(2) . . ?
 F3AA C10A F2AA 107(3) . . ?
 F3AA C10A C4A 99.8(17) . . ?
 O2A C11A C12A 112.0(12) . . ?
 O3A C11A O2A 121.4(13) . . ?
 O3A C11A C12A 126.5(13) . . ?
 C11A C12A H12A 109.5 . . ?
 C11A C12A H12B 109.5 . . ?
 C11A C12A H12C 109.5 . . ?
 H12A C12A H12B 109.5 . . ?
 H12A C12A H12C 109.5 . . ?
 H12B C12A H12C 109.5 . . ?
 C14A C13A N1A 121.4(12) . . ?
 C14A C13A C18A 121.5(12) . . ?
 C18A C13A N1A 117.1(12) . . ?
 C13A C14A H14A 121.0 . . ?
 C13A C14A C15A 118.0(12) . . ?
 C15A C14A H14A 121.0 . . ?
 C14A C15A H15A 119.6 . . ?
 C16A C15A C14A 120.9(12) . . ?
 C16A C15A H15A 119.6 . . ?
 C15A C16A Br1A 121.4(10) . . ?
 C15A C16A Br1F 112.9(12) . . ?
 C17A C16A Br1A 118.4(9) . . ?
 C17A C16A Br1F 127.0(12) . . ?
 C17A C16A C15A 119.9(11) . . ?
 C16A C17A H17A 120.0 . . ?
 C16A C17A C18A 120.1(12) . . ?
 C18A C17A H17A 120.0 . . ?
 C13A C18A C17A 119.5(12) . . ?
 C13A C18A H18A 120.2 . . ?
 C17A C18A H18A 120.2 . . ?
 C11B O2B C8B 116.9(10) . . ?
 C1B N1B H1B 116.8 . . ?
 C1B N1B C13B 126.4(11) . . ?
 C13B N1B H1B 116.8 . . ?
 O1B C1B N1B 128.0(12) . . ?
 O1B C1B C2B 118.8(12) . . ?
 N1B C1B C2B 113.2(11) . . ?
 C3B C2B C1B 121.0(11) . . ?
 C3B C2B C7B 120.9(13) . . ?
 C7B C2B C1B 117.8(13) . . ?
 C2B C3B H3B 119.5 . . ?
 C4B C3B C2B 120.9(13) . . ?
 C4B C3B H3B 119.5 . . ?
 C3B C4B C5B 118.8(13) . . ?
 C3B C4B C10B 119.2(14) . . ?
 C10B C4B C5B 122.0(13) . . ?
 C4B C5B H5B 119.8 . . ?
 C6B C5B C4B 120.3(13) . . ?
 C6B C5B H5B 119.8 . . ?
 C5B C6B H6B 119.3 . . ?
 C5B C6B C7B 121.4(15) . . ?
 C7B C6B H6B 119.3 . . ?
 C2B C7B C6B 117.4(13) . . ?
 C2B C7B C8B 122.7(12) . . ?
 C6B C7B C8B 119.8(12) . . ?
 O2B C8B C7B 108.4(10) . . ?
 O2B C8B H8B 109.8 . . ?
 O2B C8B C9B 105.3(10) . . ?
 C7B C8B H8B 109.8 . . ?
 C9B C8B C7B 113.5(11) . . ?
 C9B C8B H8B 109.8 . . ?
 C8B C9B H9BA 109.5 . . ?
 C8B C9B H9BB 109.5 . . ?
 C8B C9B H9BC 109.5 . . ?
 H9BA C9B H9BB 109.5 . . ?
 H9BA C9B H9BC 109.5 . . ?
 H9BB C9B H9BC 109.5 . . ?
 F1B C10B F3B 101.5(13) . . ?
 F1B C10B C4B 113.7(14) . . ?
 F2B C10B F1B 106.3(12) . . ?
 F2B C10B F3B 101.4(14) . . ?
 F2B C10B C4B 118.1(14) . . ?
 F3B C10B C4B 114.0(12) . . ?
 O2B C11B C12B 110.5(12) . . ?
 O3B C11B O2B 120.8(11) . . ?
 O3B C11B C12B 128.5(12) . . ?
 C11B C12B H12J 109.5 . . ?
 C11B C12B H12K 109.5 . . ?
 C11B C12B H12L 109.5 . . ?
 H12J C12B H12K 109.5 . . ?
 H12J C12B H12L 109.5 . . ?
 H12K C12B H12L 109.5 . . ?
 N1B C13B C18B 118.1(11) . . ?
 C14B C13B N1B 124.0(11) . . ?
 C14B C13B C18B 117.9(12) . . ?
 C13B C14B H14B 119.0 . . ?
 C13B C14B C15B 122.1(12) . . ?
 C15B C14B H14B 119.0 . . ?
 C14B C15B H15B 121.4 . . ?
 C16B C15B C14B 117.3(12) . . ?
 C16B C15B H15B 121.4 . . ?
 C15B C16B Br1B 119.4(11) . . ?
 C15B C16B Br1G 111.7(13) . . ?
 C17B C16B Br1B 117.9(10) . . ?
 C17B C16B Br1G 125.2(13) . . ?
 C17B C16B C15B 122.6(12) . . ?
 C16B C17B H17B 120.4 . . ?
 C18B C17B C16B 119.2(12) . . ?
 C18B C17B H17B 120.4 . . ?
 C13B C18B H18B 119.6 . . ?
 C17B C18B C13B 120.9(12) . . ?
 C17B C18B H18B 119.6 . . ?
 C11C O2C C8C 118.3(10) . . ?
 C1C N1C H1C 116.7 . . ?
 C1C N1C C13C 126.5(12) . . ?
 C13C N1C H1C 116.7 . . ?
 O1C C1C N1C 127.0(12) . . ?
 O1C C1C C2C 120.0(11) . . ?
 N1C C1C C2C 113.0(11) . . ?
 C3C C2C C1C 120.6(11) . . ?
 C3C C2C C7C 120.9(11) . . ?
 C7C C2C C1C 118.4(11) . . ?
 C2C C3C H3C 120.5 . . ?
 C2C C3C C4C 119.0(12) . . ?
 C4C C3C H3C 120.5 . . ?
 C3C C4C C10C 117.3(13) . . ?
 C5C C4C C3C 120.3(13) . . ?
 C5C C4C C10C 122.4(13) . . ?
 C4C C5C H5C 120.6 . . ?
 C4C C5C C6C 118.7(14) . . ?
 C6C C5C H5C 120.6 . . ?
 C5C C6C H6C 119.4 . . ?
 C7C C6C C5C 121.1(14) . . ?
 C7C C6C H6C 119.4 . . ?
 C2C C7C C8C 122.3(11) . . ?
 C6C C7C C2C 119.9(12) . . ?
 C6C C7C C8C 117.9(12) . . ?
 O2C C8C C7C 109.0(10) . . ?
 O2C C8C H8C 108.7 . . ?
 O2C C8C C9C 107.8(10) . . ?
 C7C C8C H8C 108.7 . . ?
 C9C C8C C7C 113.8(11) . . ?
 C9C C8C H8C 108.7 . . ?
 C8C C9C H9CA 109.5 . . ?
 C8C C9C H9CB 109.5 . . ?
 C8C C9C H9CC 109.5 . . ?
 H9CA C9C H9CB 109.5 . . ?
 H9CA C9C H9CC 109.5 . . ?
 H9CB C9C H9CC 109.5 . . ?
 F1C C10C F2C 103.3(12) . . ?
 F1C C10C F3C 109.1(14) . . ?
 F1C C10C C4C 115.2(12) . . ?
 F1CC C10C C4C 108.6(17) . . ?
 F2C C10C C4C 112.9(12) . . ?
 F2CC C10C F1CC 108(2) . . ?
 F2CC C10C F3CC 113(3) . . ?
 F2CC C10C C4C 114.9(18) . . ?
 F3C C10C F2C 101.9(13) . . ?
 F3C C10C C4C 113.2(15) . . ?
 F3CC C10C F1CC 97(3) . . ?
 F3CC C10C C4C 113(3) . . ?
 O2C C11C C12C 114.7(11) . . ?
 O3C C11C O2C 121.6(12) . . ?
 O3C C11C C12C 123.6(12) . . ?
 C11C C12C H12D 109.5 . . ?
 C11C C12C H12E 109.5 . . ?
 C11C C12C H12F 109.5 . . ?
 H12D C12C H12E 109.5 . . ?
 H12D C12C H12F 109.5 . . ?
 H12E C12C H12F 109.5 . . ?
 N1C C13C C14C 123.9(12) . . ?
 N1C C13C C18C 116.4(12) . . ?
 C14C C13C C18C 119.6(11) . . ?
 C13C C14C H14C 120.5 . . ?
 C15C C14C C13C 119.1(12) . . ?
 C15C C14C H14C 120.5 . . ?
 C14C C15C H15C 119.5 . . ?
 C16C C15C C14C 120.9(12) . . ?
 C16C C15C H15C 119.5 . . ?
 C15C C16C Br1C 121.2(10) . . ?
 C15C C16C Br1H 109.1(15) . . ?
 C15C C16C C17C 121.8(13) . . ?
 C17C C16C Br1C 116.9(10) . . ?
 C17C C16C Br1H 128.6(15) . . ?
 C16C C17C H17C 120.2 . . ?
 C16C C17C C18C 119.6(13) . . ?
 C18C C17C H17C 120.2 . . ?
 C13C C18C H18C 120.6 . . ?
 C17C C18C C13C 118.8(13) . . ?
 C17C C18C H18C 120.6 . . ?

loop_
  _geom_hbond_atom_site_label_D
  _geom_hbond_atom_site_label_H
  _geom_hbond_atom_site_label_A
  _geom_hbond_distance_DH
  _geom_hbond_distance_HA
  _geom_hbond_distance_DA
  _geom_hbond_angle_DHA
  _geom_hbond_site_symmetry_A
 N1 H1 O3A 0.88 1.98 2.856(13) 172.7 .
 N1A H1A O3 0.88 2.08 2.943(14) 168.4 .
 N1B H1B O3C 0.88 2.00 2.869(14) 170.4 .
 N1C H1C O3B 0.88 2.06 2.926(14) 167.9 .

_shelx_res_file
;
TITL Yu73 in P21 #4
    yu73.res
    created by SHELXL-2016/6 at 12:51:54 on 20-Jun-2017
REM SHELXT solution in P2(1)
REM R1 0.200, Rweak 0.060, Alpha 0.014, Orientation as input
REM Flack x = 0.166 ( 0.005 ) from Parsons' quotients
REM Formula found by SHELXT: C71 N6 O14 F1 Br4
CELL 0.71073 8.3942 15.6617 27.2696 90 98.797 90
ZERR 8 0.0008 0.0016 0.0029 0 0.003 0
LATT -1
SYMM -X,0.5+Y,-Z
SFAC C H Br F N O
UNIT 144 120 8 24 8 24
DFIX 1.35 F1C C10C F1CC C10C F3C C10C F2CC C10C F2C C10C F3CC C10C F2AA C10A =
 F1A C10A F1AA C10A F3A C10A F3AA C10A F2A C10A
RIGU 0.002 0.002 F1A F1AA F2A F2AA F3A F3AA C10A
RIGU 0.002 0.002 F1C F1CC F2C F2CC F3C F3CC C10C
EADP F2AA F2A
EADP F1A F1AA
EADP F3A F3AA
EADP F3C F3CC
EADP F1CC F1C
EADP F2CC F2C
EADP Br1E Br1
EADP Br1A Br1F
EADP Br1H Br1C
EADP Br1B Br1G

L.S. 10
PLAN  20
SIZE 0.135 0.021 0.017
TEMP -173.15
HTAB N1 O3A
HTAB N1B O3C
HTAB N1C O3B
HTAB N1A O3
BOND $H
MORE -1
fmap 2
acta 50
TWIN -1 0 0 0 -1 0 1 0 1 2
REM <olex2.extras>
REM <HklSrc "%.\\sad.hkl">
REM </olex2.extras>

WGHT    0.106200
BASF   0.20101
FVAR       0.19561   0.75396   0.70212   0.82805   0.80808   0.80758   0.85289
PART 1
BR1   3   -0.197704    0.303315    0.803528    71.00000    0.05507    0.03329 =
         0.03328   -0.00670   -0.00085   -0.00202
PART 0
PART 2
BR1E  3   -0.185506    0.289025    0.820574   -71.00000    0.05507    0.03329 =
         0.03328   -0.00670   -0.00085   -0.00202
PART 0
F1    4   -0.233110    1.074765    0.906394    11.00000    0.12454    0.05160 =
         0.05885   -0.00709   -0.00128    0.03637
F2    4   -0.327644    0.980737    0.853653    11.00000    0.07086    0.05594 =
         0.06747    0.01051   -0.01212    0.00168
F3    4   -0.090370    1.026662    0.855054    11.00000    0.06895    0.10837 =
         0.10366    0.05334    0.03291    0.02617
O1    6   -0.251757    0.658730    0.959266    11.00000    0.05652    0.06826 =
         0.04482    0.00420    0.01548   -0.02026
O2    6    0.195081    0.746172    1.042765    11.00000    0.05169    0.03543 =
         0.03382   -0.00151    0.00745    0.00433
O3    6    0.246080    0.688668    0.970007    11.00000    0.05037    0.05585 =
         0.03447    0.00060   -0.00060    0.00407
N1    5   -0.140559    0.663586    0.885841    11.00000    0.02929    0.02405 =
         0.04195   -0.00010    0.00530    0.00151
AFIX  43
H1    2   -0.101924    0.700480    0.866347    11.00000   -1.20000
AFIX   0
C1    1   -0.176746    0.695664    0.930115    11.00000    0.03444    0.04511 =
         0.03619    0.00291   -0.00232   -0.00106
C2    1   -0.124181    0.785448    0.941094    11.00000    0.05142    0.02805 =
         0.04376    0.00560    0.01242   -0.00027
C3    1   -0.170553    0.848571    0.906915    11.00000    0.06979    0.04040 =
         0.03205   -0.00227    0.00865   -0.00228
AFIX  43
H3    2   -0.226375    0.834279    0.874997    11.00000   -1.20000
AFIX   0
C4    1   -0.135082    0.934764    0.919317    11.00000    0.04737    0.03104 =
         0.04466   -0.01263    0.01768   -0.01135
C5    1   -0.043070    0.954217    0.964737    11.00000    0.04213    0.03386 =
         0.06301   -0.00173    0.01288   -0.00071
AFIX  43
H5    2   -0.018693    1.011990    0.973480    11.00000   -1.20000
AFIX   0
C6    1    0.013528    0.888494    0.997534    11.00000    0.03592    0.04415 =
         0.03407    0.00408    0.00038    0.00627
AFIX  43
H6    2    0.082790    0.901612    1.027496    11.00000   -1.20000
AFIX   0
C7    1   -0.029623    0.805662    0.986987    11.00000    0.04209    0.04780 =
         0.03974   -0.00440    0.00786    0.00948
C8    1    0.020838    0.735391    1.024198    11.00000    0.04697    0.03618 =
         0.04630    0.00192   -0.00080    0.00278
AFIX  13
H8    2   -0.000805    0.677987    1.008535    11.00000   -1.20000
AFIX   0
C9    1   -0.058887    0.743508    1.069411    11.00000    0.06119    0.05619 =
         0.03394   -0.00040    0.00799    0.00173
AFIX 137
H9A   2   -0.025777    0.797195    1.086439    11.00000   -1.50000
H9B   2   -0.026930    0.695448    1.091774    11.00000   -1.50000
H9C   2   -0.176197    0.743199    1.059646    11.00000   -1.50000
AFIX   0
C10   1   -0.197596    1.001383    0.884985    11.00000    0.03541    0.05528 =
         0.04357   -0.01467    0.00805    0.00053
C11   1    0.296739    0.714242    1.012825    11.00000    0.05310    0.04122 =
         0.04619    0.01194    0.02171    0.00458
C12   1    0.467915    0.715746    1.037009    11.00000    0.04235    0.04335 =
         0.04896    0.00389    0.00036    0.01548
AFIX 137
H12G  2    0.484565    0.672504    1.063269    11.00000   -1.50000
H12H  2    0.493947    0.772297    1.051423    11.00000   -1.50000
H12I  2    0.538070    0.703430    1.012275    11.00000   -1.50000
AFIX   0
C13   1   -0.158320    0.577633    0.867869    11.00000    0.02901    0.03950 =
         0.03609    0.00075   -0.00450   -0.00308
C14   1   -0.230818    0.515029    0.892449    11.00000    0.03441    0.02835 =
         0.03935   -0.00281    0.00309    0.00350
AFIX  43
H14   2   -0.276323    0.528396    0.921340    11.00000   -1.20000
AFIX   0
C15   1   -0.235933    0.433367    0.874435    11.00000    0.03962    0.03871 =
         0.03161    0.00359   -0.00579   -0.01177
AFIX  43
H15   2   -0.278750    0.389226    0.892452    11.00000   -1.20000
AFIX   0
C16   1   -0.181261    0.413916    0.831415    11.00000    0.03848    0.03229 =
         0.02627    0.00030   -0.00754   -0.00041
C17   1   -0.110245    0.478010    0.805450    11.00000    0.03445    0.04936 =
         0.03223    0.00340    0.00845    0.00102
AFIX  43
H17   2   -0.070487    0.465527    0.775448    11.00000   -1.20000
AFIX   0
C18   1   -0.100423    0.559930    0.825219    11.00000    0.04333    0.03504 =
         0.03458   -0.00099    0.00140   -0.00594
AFIX  43
H18   2   -0.052471    0.604166    0.808625    11.00000   -1.20000
AFIX   0

PART 1
BR1A  3    0.328841    0.285199    0.823455    61.00000    0.05472    0.03100 =
         0.03863   -0.00397    0.00299   -0.00084
PART 0
PART 2
BR1F  3    0.306003    0.297790    0.810262   -61.00000    0.05472    0.03100 =
         0.03863   -0.00397    0.00299   -0.00084
PART 0
PART 1
F1A   4    0.484908    1.032402    0.988293    21.00000    0.09764    0.05375 =
         0.05458   -0.00397    0.01092   -0.01703
PART 0
PART 2
F1AA  4    0.366260    1.024682    0.991143   -21.00000    0.09764    0.05375 =
         0.05458   -0.00397    0.01092   -0.01703
PART 0
PART 1
F2A   4    0.619316    0.915981    0.999228    21.00000    0.06555    0.08095 =
         0.04645   -0.01611    0.00246   -0.02207
PART 0
PART 2
F2AA  4    0.592451    1.001728    0.983832   -21.00000    0.06555    0.08095 =
         0.04645   -0.01611    0.00246   -0.02207
PART 0
PART 1
F3A   4    0.388056    0.917040    1.015631    21.00000    0.06758    0.06214 =
         0.02356   -0.00686    0.00528   -0.01663
PART 0
PART 2
F3AA  4    0.513015    0.877902    0.999446   -21.00000    0.06758    0.06214 =
         0.02356   -0.00686    0.00528   -0.01663
PART 0
O1A   6    0.500648    0.726041    0.815863    11.00000    0.04407    0.09428 =
         0.03953   -0.00124    0.01724   -0.00895
O2A   6    0.062663    0.870711    0.766498    11.00000    0.03867    0.03658 =
         0.04174    0.00572    0.00976   -0.00277
O3A   6   -0.002237    0.770881    0.818857    11.00000    0.05868    0.03597 =
         0.03599    0.00349    0.00949   -0.00245
N1A   5    0.358992    0.665320    0.873908    11.00000    0.03929    0.02944 =
         0.03983   -0.00188    0.00845   -0.00427
AFIX  43
H1A   2    0.318612    0.678959    0.900801    11.00000   -1.20000
AFIX   0
C1A   1    0.420369    0.729932    0.849284    11.00000    0.06035    0.03901 =
         0.03240   -0.00351   -0.00494   -0.00284
C2A   1    0.378485    0.817888    0.866898    11.00000    0.04424    0.04190 =
         0.03281   -0.00651    0.00017   -0.00845
C3A   1    0.429642    0.843995    0.915835    11.00000    0.07959    0.03592 =
         0.04167    0.00350    0.02285   -0.00767
AFIX  43
H3A   2    0.483701    0.804886    0.939324    11.00000   -1.20000
AFIX   0
C4A   1    0.402129    0.924934    0.929707    11.00000    0.06003    0.03547 =
         0.04921   -0.00298    0.02396   -0.00181
C5A   1    0.314891    0.982306    0.897022    11.00000    0.04868    0.05072 =
         0.05381   -0.03328    0.01935   -0.01037
AFIX  43
H5A   2    0.300435    1.039291    0.907439    11.00000   -1.20000
AFIX   0
C6A   1    0.249314    0.957510    0.849802    11.00000    0.07079    0.05109 =
         0.04740   -0.00916    0.02073   -0.03567
AFIX  43
H6A   2    0.178751    0.993735    0.828591    11.00000   -1.20000
AFIX   0
C7A   1    0.292881    0.873873    0.834068    11.00000    0.05039    0.03686 =
         0.03339    0.00423   -0.00254   -0.00191
C8A   1    0.233739    0.845127    0.780982    11.00000    0.03782    0.04139 =
         0.03570    0.00250   -0.00460    0.00419
AFIX  13
H8A   2    0.244571    0.781784    0.778266    11.00000   -1.20000
AFIX   0
C9A   1    0.323727    0.889341    0.743944    11.00000    0.04375    0.04782 =
         0.04011   -0.00471    0.00573    0.00131
AFIX 137
H9AA  2    0.288812    0.865730    0.710760    11.00000   -1.50000
H9AB  2    0.439832    0.880152    0.753434    11.00000   -1.50000
H9AC  2    0.300642    0.950689    0.743723    11.00000   -1.50000
AFIX   0
C10A  1    0.463603    0.951147    0.980716    11.00000    0.06591    0.05799 =
         0.04641   -0.00656    0.01276   -0.02054
C11A  1   -0.044731    0.825846    0.787026    11.00000    0.07180    0.03843 =
         0.03138   -0.00876    0.01208   -0.00772
C12A  1   -0.216144    0.849931    0.766003    11.00000    0.03609    0.05481 =
         0.05193   -0.00908   -0.01709    0.00455
AFIX 137
H12A  2   -0.290336    0.807035    0.775745    11.00000   -1.50000
H12B  2   -0.227581    0.852478    0.729725    11.00000   -1.50000
H12C  2   -0.241545    0.905883    0.778920    11.00000   -1.50000
AFIX   0
C13A  1    0.354033    0.576812    0.860034    11.00000    0.03538    0.03567 =
         0.04017    0.00415    0.00060   -0.00080
C14A  1    0.402673    0.549923    0.816323    11.00000    0.03932    0.04326 =
         0.03706    0.00801    0.00891   -0.00377
AFIX  43
H14A  2    0.442369    0.589438    0.794681    11.00000   -1.20000
AFIX   0
C15A  1    0.391603    0.462230    0.804853    11.00000    0.04737    0.05115 =
         0.02471   -0.00660    0.00291   -0.00226
AFIX  43
H15A  2    0.424996    0.442196    0.775151    11.00000   -1.20000
AFIX   0
C16A  1    0.332618    0.404754    0.836335    11.00000    0.03807    0.02352 =
         0.03476   -0.00206    0.00009   -0.00504
C17A  1    0.290854    0.432803    0.880622    11.00000    0.04773    0.02427 =
         0.03472    0.01358    0.00046    0.00042
AFIX  43
H17A  2    0.258038    0.392917    0.903351    11.00000   -1.20000
AFIX   0
C18A  1    0.296772    0.519687    0.892055    11.00000    0.03915    0.03741 =
         0.03438   -0.00445    0.00550    0.00717
AFIX  43
H18A  2    0.261827    0.539558    0.921561    11.00000   -1.20000
AFIX   0

PART 1
BR1B  3   -0.005156    0.695014    0.694441    51.00000    0.05335    0.03674 =
         0.03352   -0.00996    0.00842    0.00161
PART 0
PART 2
BR1G  3    0.000343    0.699910    0.680529   -51.00000    0.05335    0.03674 =
         0.03352   -0.00996    0.00842    0.00161
PART 0
F1B   4   -0.144295   -0.077141    0.594483    11.00000    0.11135    0.05289 =
         0.06648    0.00331    0.01354   -0.02628
F2B   4   -0.157738    0.014784    0.651849    11.00000    0.11557    0.06438 =
         0.06515    0.00287    0.03729    0.01499
F3B   4    0.065510   -0.036893    0.643846    11.00000    0.05781    0.11998 =
         0.11213    0.06204   -0.01074   -0.01567
O1B   6   -0.208643    0.334509    0.541983    11.00000    0.04903    0.06040 =
         0.05354    0.00184   -0.00929    0.03059
O2B   6    0.156372    0.248876    0.457674    11.00000    0.04764    0.04671 =
         0.03603   -0.00497    0.00098   -0.01292
O3B   6    0.281525    0.308628    0.530583    11.00000    0.04682    0.05314 =
         0.04796    0.00360   -0.00688   -0.00283
N1B   5   -0.017253    0.332450    0.615329    11.00000    0.03442    0.03280 =
         0.03290   -0.00005    0.00071    0.00315
AFIX  43
H1B   2    0.044707    0.296743    0.634542    11.00000   -1.20000
AFIX   0
C1B   1   -0.102848    0.299149    0.571669    11.00000    0.04586    0.04120 =
         0.04582    0.00223    0.01827    0.00125
C2B   1   -0.055754    0.207975    0.561415    11.00000    0.03254    0.05791 =
         0.03866   -0.01131    0.00628   -0.01067
C3B   1   -0.072158    0.143793    0.594305    11.00000    0.06287    0.04545 =
         0.02609   -0.00018   -0.00328    0.00239
AFIX  43
H3B   2   -0.100194    0.157370    0.625850    11.00000   -1.20000
AFIX   0
C4B   1   -0.048866    0.060708    0.582468    11.00000    0.03274    0.03697 =
         0.05297   -0.00333    0.00352   -0.00067
C5B   1   -0.000747    0.041714    0.535736    11.00000    0.03961    0.03552 =
         0.07333   -0.01217    0.02059   -0.00669
AFIX  43
H5B   2    0.015948   -0.015916    0.526912    11.00000   -1.20000
AFIX   0
C6B   1    0.020747    0.103891    0.504630    11.00000    0.08822    0.03386 =
         0.05395   -0.00636    0.01034   -0.00756
AFIX  43
H6B   2    0.058575    0.090439    0.474449    11.00000   -1.20000
AFIX   0
C7B   1   -0.011455    0.190312    0.515334    11.00000    0.03618    0.04094 =
         0.04822   -0.00397    0.01099   -0.00173
C8B   1    0.000037    0.259137    0.476545    11.00000    0.04199    0.03709 =
         0.04147    0.00154    0.00669   -0.00330
AFIX  13
H8B   2   -0.005183    0.316898    0.491846    11.00000   -1.20000
AFIX   0
C9B   1   -0.126431    0.251808    0.431913    11.00000    0.03299    0.07723 =
         0.06594    0.01258    0.01738    0.00534
AFIX 137
H9BA  2   -0.108753    0.295706    0.407706    11.00000   -1.50000
H9BB  2   -0.233023    0.259730    0.441706    11.00000   -1.50000
H9BC  2   -0.120580    0.195173    0.417012    11.00000   -1.50000
AFIX   0
C10B  1   -0.075227   -0.004500    0.616712    11.00000    0.02617    0.06020 =
         0.07340   -0.02067    0.00827   -0.01297
C11B  1    0.289813    0.278447    0.486992    11.00000    0.03930    0.03391 =
         0.05580    0.00719    0.00317   -0.01074
C12B  1    0.429997    0.276329    0.460288    11.00000    0.05633    0.05608 =
         0.06001    0.00138    0.02888   -0.01190
AFIX 137
H12J  2    0.410122    0.235090    0.433009    11.00000   -1.50000
H12K  2    0.526282    0.259336    0.483215    11.00000   -1.50000
H12L  2    0.446671    0.333154    0.446908    11.00000   -1.50000
AFIX   0
C13B  1   -0.020240    0.416886    0.631539    11.00000    0.02779    0.03727 =
         0.01869    0.00112    0.00535    0.00219
C14B  1   -0.117581    0.478984    0.607512    11.00000    0.03853    0.03397 =
         0.02940    0.00135    0.00502   -0.00006
AFIX  43
H14B  2   -0.188069    0.464531    0.578022    11.00000   -1.20000
AFIX   0
C15B  1   -0.116427    0.562488    0.624937    11.00000    0.03667    0.04035 =
         0.03237    0.00372   -0.00557   -0.00257
AFIX  43
H15B  2   -0.185372    0.604838    0.608195    11.00000   -1.20000
AFIX   0
C16B  1   -0.010217    0.581457    0.667874    11.00000    0.04586    0.03174 =
         0.04041   -0.01451    0.01443    0.00069
C17B  1    0.086470    0.521376    0.693578    11.00000    0.03834    0.04627 =
         0.01823    0.00253   -0.00258    0.00182
AFIX  43
H17B  2    0.156602    0.536420    0.723030    11.00000   -1.20000
AFIX   0
C18B  1    0.081177    0.439614    0.676493    11.00000    0.03861    0.03881 =
         0.03402    0.00939    0.00796    0.01044
AFIX  43
H18B  2    0.145859    0.397131    0.694741    11.00000   -1.20000
AFIX   0
PART 1
BR1C  3    0.483592    0.706883    0.679541    41.00000    0.05314    0.03320 =
         0.03930   -0.00597   -0.00191    0.00494
PART 0
PART 2
BR1H  3    0.499723    0.693504    0.692886   -41.00000    0.05314    0.03320 =
         0.03930   -0.00597   -0.00191    0.00494
PART 0
PART 1
F1C   4    0.511413   -0.037085    0.509115    31.00000    0.10112    0.04111 =
         0.05133   -0.01404    0.00787    0.00213
PART 0
PART 2
F1CC  4    0.398727   -0.032607    0.504305   -31.00000    0.10112    0.04111 =
         0.05133   -0.01404    0.00787    0.00213
PART 0
PART 1
F2C   4    0.622929    0.082006    0.498489    31.00000    0.06505    0.06828 =
         0.03599   -0.00619    0.00867    0.00605
PART 0
PART 2
F2CC  4    0.633241    0.031871    0.507510   -31.00000    0.06505    0.06828 =
         0.03599   -0.00619    0.00867    0.00605
PART 0
PART 1
F3C   4    0.367599    0.072706    0.482979    31.00000    0.06176    0.06329 =
         0.03857    0.00172    0.00049    0.00348
PART 0
PART 2
F3CC  4    0.404712    0.095192    0.481841   -31.00000    0.06176    0.06329 =
         0.03857    0.00172    0.00049    0.00348
PART 0
O1C   6    0.703096    0.272277    0.680827    11.00000    0.03735    0.03567 =
         0.03686    0.00184   -0.00568    0.00249
O2C   6    0.317100    0.125635    0.732966    11.00000    0.04567    0.03855 =
         0.03327    0.00426   -0.00047    0.00655
O3C   6    0.200380    0.233187    0.684215    11.00000    0.04398    0.08738 =
         0.02871    0.00154    0.00562    0.00768
N1C   5    0.493220    0.331688    0.625363    11.00000    0.04033    0.02777 =
         0.03232    0.00599    0.00529    0.00117
AFIX  43
H1C   2    0.423221    0.318462    0.599041    11.00000   -1.20000
AFIX   0
C1C   1    0.584134    0.266197    0.648128    11.00000    0.05074    0.03539 =
         0.04405    0.00075    0.02094   -0.00115
C2C   1    0.523199    0.179382    0.630134    11.00000    0.03713    0.03076 =
         0.03127   -0.00605    0.00460    0.00641
C3C   1    0.526239    0.154784    0.581894    11.00000    0.04633    0.04276 =
         0.03140    0.00480    0.00126   -0.00631
AFIX  43
H3C   2    0.559481    0.193686    0.558716    11.00000   -1.20000
AFIX   0
C4C   1    0.478624    0.069770    0.567105    11.00000    0.06208    0.03570 =
         0.04004   -0.00376   -0.00906    0.01240
C5C   1    0.426410    0.013735    0.600747    11.00000    0.04560    0.04999 =
         0.04917   -0.01542   -0.00149    0.01062
AFIX  43
H5C   2    0.392666   -0.042426    0.590920    11.00000   -1.20000
AFIX   0
C6C   1    0.424427    0.041614    0.649513    11.00000    0.04481    0.03604 =
         0.05537    0.00916    0.00091    0.00253
AFIX  43
H6C   2    0.388540    0.003855    0.672808    11.00000   -1.20000
AFIX   0
C7C   1    0.473705    0.122957    0.664261    11.00000    0.03408    0.03800 =
         0.03504    0.00206   -0.00080    0.00473
C8C   1    0.471968    0.148033    0.719485    11.00000    0.05737    0.02663 =
         0.04157    0.00209    0.01822    0.00668
AFIX  13
H8C   2    0.486870    0.211214    0.722922    11.00000   -1.20000
AFIX   0
C9C   1    0.598500    0.105120    0.754942    11.00000    0.04918    0.04460 =
         0.05301   -0.00033    0.00011    0.00555
AFIX 137
H9CA  2    0.581584    0.043212    0.753245    11.00000   -1.50000
H9CB  2    0.592697    0.125146    0.788671    11.00000   -1.50000
H9CC  2    0.704808    0.118653    0.746336    11.00000   -1.50000
AFIX   0
C10C  1    0.490901    0.044878    0.516001    11.00000    0.05817    0.03988 =
         0.04275   -0.00642    0.00225    0.00574
C11C  1    0.189571    0.171792    0.714396    11.00000    0.05512    0.03683 =
         0.03600    0.00502    0.00945    0.00979
C12C  1    0.038624    0.149546    0.733822    11.00000    0.06621    0.04566 =
         0.04647   -0.00837    0.02856    0.00035
AFIX 137
H12D  2    0.027321    0.186353    0.762148    11.00000   -1.50000
H12E  2    0.043068    0.089706    0.744450    11.00000   -1.50000
H12F  2   -0.053960    0.157921    0.707666    11.00000   -1.50000
AFIX   0
C13C  1    0.500375    0.416701    0.639613    11.00000    0.05079    0.02978 =
         0.02674   -0.00147    0.02084   -0.00183
C14C  1    0.588255    0.446466    0.683908    11.00000    0.03554    0.04422 =
         0.02475    0.01203    0.00144    0.00461
AFIX  43
H14C  2    0.650436    0.408166    0.706123    11.00000   -1.20000
AFIX   0
C15C  1    0.583524    0.532551    0.695006    11.00000    0.04647    0.04082 =
         0.02479   -0.00244    0.00666    0.00135
AFIX  43
H15C  2    0.643306    0.553306    0.725039    11.00000   -1.20000
AFIX   0
C16C  1    0.494889    0.587635    0.663666    11.00000    0.03470    0.03410 =
         0.03604   -0.00721    0.00208    0.00522
C17C  1    0.403651    0.560567    0.620038    11.00000    0.03717    0.04504 =
         0.03925   -0.00301    0.00112    0.00956
AFIX  43
H17C  2    0.338944    0.600117    0.599378    11.00000   -1.20000
AFIX   0
C18C  1    0.406896    0.475589    0.606547    11.00000    0.04746    0.02636 =
         0.03317    0.00421    0.00495   -0.00301
AFIX  43
H18C  2    0.348325    0.456467    0.575940    11.00000   -1.20000
AFIX   0
HKLF 4


REM  Yu73 in P21 #4
REM R1 =  0.0630 for   10657 Fo > 4sig(Fo)  and  0.0788 for all   13034 data
REM    982 parameters refined using     85 restraints

END

WGHT      0.1062      0.0000

REM Highest difference peak  1.458,  deepest hole -0.506,  1-sigma level  0.126
Q1    1   0.6883  0.2170  0.6836  11.00000  0.05    0.81
Q2    1   0.5081  0.7821  0.8125  11.00000  0.05    0.79
Q3    1   0.6322  0.2556  0.4572  11.00000  0.05    0.77
Q4    1   0.0048  0.7121  0.8197  11.00000  0.05    0.75
Q5    1   0.7929  0.1253  0.7333  11.00000  0.05    0.73
Q6    1  -0.1317  0.0774  0.4872  11.00000  0.05    0.71
Q7    1   0.5720  0.8736  0.7657  11.00000  0.05    0.71
Q8    1  -0.3319  0.7443  1.0389  11.00000  0.05    0.68
Q9    1   0.4000  1.0200  0.8564  11.00000  0.05    0.63
Q10   1   0.4284  0.2051  0.5602  11.00000  0.05    0.62
Q11   1  -0.1299  0.9165  1.0142  11.00000  0.05    0.62
Q12   1  -0.2220  0.7023  1.0051  11.00000  0.05    0.62
Q13   1   0.3311  0.0045  0.6515  11.00000  0.05    0.61
Q14   1   0.2535  1.0752  0.9050  11.00000  0.05    0.60
Q15   1   0.5546 -0.0251  0.6476  11.00000  0.05    0.60
Q16   1   0.3605 -0.0796  0.5954  11.00000  0.05    0.59
Q17   1   0.3773  0.7885  0.9392  11.00000  0.05    0.59
Q18   1   0.4064  0.1437  0.5884  11.00000  0.05    0.58
Q19   1   0.0088  0.1736  0.6333  11.00000  0.05    0.57
Q20   1   0.1776  0.2173  0.6766  11.00000  0.05    0.57
;
_shelx_res_checksum               39663
_shelx_hkl_file
;
   1   0   0 1.61195 1.02912   3
  -1   0   0 3.81197 1.41272   3
  -2   0   0 1496.87 97.1800   6
   2   0   0 1447.39 97.2016   3
  -2   0   0 1531.74 97.2311   3
  -3   0   0 21.0376 3.84296   6
   3   0   0 20.5790 4.08560   3
  -3   0   0 18.9128 3.76802   1
   4   0   0 471.996 33.1898   3
  -4   0   0 477.157 33.3084   1
  -4   0   0 482.598 32.7233   2
  -4   0   0 473.923 32.8646   6
  -5   0   0 37.9788 5.45472   2
   5   0   0 39.2461 6.22783   3
  -5   0   0 26.6934 4.94908   6
  -5   0   0 29.7372 5.55999   1
   6   0   0 309.194 23.2914   3
  -6   0   0 302.750 23.0348   1
  -6   0   0 324.907 22.6999   2
  -6   0   0 290.963 22.5056   6
  -7   0   0 1.60537 3.03845   2
  -7   0   0 4.74631 3.67041   6
   7   0   0 5.31184 3.82061   3
  -7   0   0 9.92611 3.95917   1
  -8   0   0 4.12336 3.25292   1
   8   0   0 14.3759 4.86038   3
  -8   0   0 10.4547 4.19100   6
  -8   0   0 5.43252 3.54408   2
  -9   0   0 -1.0323 3.47471   1
  -9   0   0 0.09305 3.34242   6
   9   0   0 3.23687 3.89606   3
  -9   0   0 1.23770 2.65806   2
   0  -1   0 0.06016 0.39058   1
   0  -1   0 -0.3347 0.47927   7
   0  -1   0 -0.1493 0.40386   4
   0   1   0 0.01573 0.31682   6
   0   1   0 0.08473 0.45756   5
   0   1   0 0.05448 0.54280   7
   0   1   0 -0.3316 0.34799   2
   0   1   0 -0.2396 0.35954   3
   0   1   0 -0.0568 0.47498   4
   1  -1   0 34.9776 3.15698   1
   1  -1   0 25.0752 2.52607   7
   1  -1   0 27.1970 2.36967   5
  -1  -1   0 26.4651 2.46656   7
  -1  -1   0 26.2207 2.45385   7
  -1  -1   0 27.8753 3.18023   3
  -1  -1   0 22.5526 2.30053   5
   1  -1   0 22.4671 2.25739   5
  -1  -1   0 28.5607 3.08333   2
   1  -1   0 29.9415 2.52921   6
  -1   1   0 26.2444 2.25803   4
  -1   1   0 23.0538 2.42495   7
   1   1   0 24.2026 2.38829   7
  -1   1   0 25.3180 2.58755   7
   1   1   0 27.3674 3.15069   3
  -1   1   0 23.5307 2.29296   4
  -1   1   0 24.8906 2.48212   6
  -1   1   0 20.2043 2.30807   5
  -1   1   0 25.3795 2.62621   3
   1   1   0 24.0051 2.89037   2
  -1   1   0 25.2077 2.46164   5
  -1   1   0 30.8820 2.54973   2
  -1   1   0 33.9282 3.11904   1
  -2  -1   0 20.6706 2.07466   7
  -2  -1   0 20.9342 2.08108   7
   2  -1   0 22.9851 3.63273   3
   2  -1   0 17.8522 1.95924   5
   2  -1   0 13.7283 2.96431   6
   2  -1   0 22.1357 2.37762   7
   2  -1   0 15.5887 3.52484   1
  -2  -1   0 18.2442 3.48268   2
  -2  -1   0 20.5709 2.00066   5
  -2  -1   0 17.8431 4.09335   3
   2  -1   0 20.8253 2.05054   5
  -2   1   0 48.2107 4.83318   1
  -2   1   0 44.2771 3.97593   6
   2   1   0 45.9112 4.82519   3
  -3  -1   0 8.75555 2.90007   2
   3  -1   0 10.1779 1.72455   7
   3  -1   0 12.1160 1.82124   7
   3  -1   0 17.1246 3.91410   3
  -3  -1   0 11.8914 1.39020   5
   3   1   0 14.8064 1.56945   7
  -3   1   0 12.9478 1.65337   5
  -3   1   0 6.50741 2.66719   6
  -3   1   0 10.0628 3.15292   1
   3   1   0 20.1469 4.01959   3
  -4  -1   0 232.453 17.7478   2
  -4  -1   0 242.895 15.8566   5
   4  -1   0 257.798 18.1931   3
  -4  -1   0 224.204 15.8334   5
   4  -1   0 241.757 16.1013   7
  -4  -1   0 241.638 18.3940   6
  -4   1   0 249.965 17.6976   6
   4   1   0 270.642 18.8875   3
  -4   1   0 267.555 18.4129   1
  -5  -1   0 98.2632 10.0028   1
   5  -1   0 95.0422 9.42694   3
  -5  -1   0 106.381 9.59495   6
  -5  -1   0 92.3411 8.99302   2
   5   1   0 107.266 10.2867   3
  -5   1   0 106.666 9.21915   6
  -5   1   0 109.983 9.94289   1
  -6  -1   0 56.4733 6.95271   2
   6  -1   0 70.8961 8.29811   3
  -6  -1   0 47.3974 7.13834   1
  -6  -1   0 58.1739 7.27391   6
  -6   1   0 46.9331 6.53804   6
  -6   1   0 44.7124 6.37085   2
   6   1   0 46.9748 7.26803   3
  -6   1   0 48.6892 6.84463   1
   7  -1   0 8.36872 3.95149   3
  -7  -1   0 0.43353 3.57667   1
  -7  -1   0 4.26698 3.29698   6
  -7  -1   0 2.97139 3.19863   2
   7   1   0 6.58426 4.24734   3
  -7   1   0 1.98122 3.33287   6
  -7   1   0 4.54885 3.39554   1
  -7   1   0 -1.9871 2.98228   2
  -8  -1   0 6.54179 3.92593   6
   8  -1   0 14.6975 4.80026   3
  -8  -1   0 10.2089 4.30198   1
  -8  -1   0 8.36016 3.88734   2
  -8   1   0 15.8860 4.15832   6
   8   1   0 15.7902 5.06837   3
  -8   1   0 6.88363 3.99632   1
  -8   1   0 10.3493 3.74014   2
  -9  -1   0 -1.8533 3.04053   2
  -9  -1   0 -2.2180 3.34915   6
  -9  -1   0 2.98421 3.93012   1
  -9   1   0 2.42661 3.30419   6
  -9   1   0 -1.2381 3.00435   2
   9   1   0 -0.9981 3.64582   3
  -9   1   0 -0.7040 3.36783   1
   0  -2   0 492.415 32.2289   4
   0  -2   0 494.262 32.2959   5
   0  -2   0 407.139 32.3327   7
   0  -2   0 456.985 32.0300   2
   0  -2   0 496.281 31.7862   3
   0  -2   0 482.724 32.0995   1
   0  -2   0 509.075 32.3943   7
   0  -2   0 498.660 31.9379   6
   0   2   0 523.861 31.8465   3
   0   2   0 505.231 32.2819   5
   0   2   0 482.205 32.0411   2
   0   2   0 509.836 31.9814   6
   0   2   0 477.082 32.0486   1
   0   2   0 506.412 32.4891   7
   1  -2   0 95.4938 7.55743   7
  -1  -2   0 92.5101 7.62127   2
  -1  -2   0 102.476 7.54109   1
   1  -2   0 107.177 7.54318   5
   1  -2   0 98.1220 7.25018   4
   1  -2   0 98.4961 7.75331   7
  -1  -2   0 108.947 7.86798   3
  -1  -2   0 102.411 7.57139   7
   1  -2   0 102.746 7.35488   2
  -1  -2   0 104.810 7.75864   7
  -1  -2   0 99.1237 7.44059   5
   1  -2   0 100.673 7.00026   6
   1  -2   0 101.245 7.33698   4
   1  -2   0 98.0685 7.56580   1
  -1   2   0 107.701 6.96016   6
   1   2   0 101.417 7.91747   3
  -1   2   0 101.768 6.91925   3
  -1   2   0 96.2292 7.66483   7
   1   2   0 98.8577 7.61093   1
  -1   2   0 98.7910 7.27120   2
  -1   2   0 105.779 7.52335   5
   1   2   0 96.5369 7.51957   7
   1   2   0 93.6402 7.63616   2
  -1   2   0 96.4088 7.31541   4
  -1   2   0 97.2139 7.61850   7
  -1   2   0 88.2110 7.35195   5
  -1   2   0 89.3086 7.23648   4
  -1   2   0 115.847 7.68186   1
   1   2   0 90.2252 7.44794   7
   2  -2   0 1158.60 75.9224   7
   2  -2   0 1190.32 76.5840   1
   2  -2   0 1187.51 75.8744   7
   2  -2   0 1209.35 75.9592   6
   2  -2   0 1234.82 75.7416   5
  -2  -2   0 1165.59 75.7650   7
   2  -2   0 1193.38 75.2278   4
   2  -2   0 1113.07 75.8914   3
  -2  -2   0 1183.03 75.7141   7
  -2  -2   0 1137.31 76.3245   2
  -2  -2   0 1173.43 75.6742   5
   2   2   0 1136.57 76.6794   3
  -2   2   0 1157.48 76.3768   1
  -2   2   0 1147.24 75.7997   6
  -2   2   0 1185.60 75.6548   4
  -2   2   0 1131.34 75.7904   5
   2   2   0 1118.54 75.7801   7
  -2   2   0 1163.38 75.9958   3
  -2   2   0 1184.72 75.6349   4
  -2   2   0 1175.66 75.8078   7
  -2   2   0 1153.61 75.9259   7
  -2   2   0 1148.04 75.9609   2
  -3  -2   0 25.9400 2.72743   7
   3  -2   0 24.4998 4.04452   3
  -3  -2   0 26.6726 4.50008   2
  -3  -2   0 28.2382 2.88737   7
  -3  -2   0 21.1322 2.65019   5
   3   2   0 31.4884 5.17352   3
  -3   2   0 28.3998 4.37119   1
  -3   2   0 25.4918 3.82195   6
  -3   2   0 27.0100 2.69926   4
  -3   2   0 24.5780 2.68175   4
   4  -2   0 945.098 62.3627   7
  -4  -2   0 949.848 63.8033   2
   4  -2   0 983.141 63.7358   3
  -4  -2   0 920.481 62.0288   5
  -4  -2   0 969.410 62.0450   5
  -4   2   0 942.589 63.2426   6
  -4   2   0 1011.36 64.2001   1
  -4   2   0 948.039 61.9882   4
   4   2   0 968.505 64.2892   3
  -4   2   0 945.637 61.9925   4
  -5  -2   0 18.7863 1.95575   5
  -5  -2   0 18.7638 2.04340   5
  -5  -2   0 20.9791 4.64450   6
   5  -2   0 13.7538 4.05741   3
   5  -2   0 17.9477 2.35534   7
  -5  -2   0 23.5884 4.53672   2
  -5   2   0 18.0316 2.08719   4
  -5   2   0 18.1068 2.10457   4
  -5   2   0 14.1205 4.14554   1
   5   2   0 23.2235 5.41010   3
  -5   2   0 24.8537 4.23081   6
  -6  -2   0 344.805 25.4151   6
   6  -2   0 344.260 25.1949   3
  -6  -2   0 325.129 24.8948   2
  -6   2   0 348.606 24.7785   6
   6   2   0 359.224 25.7678   3
  -6   2   0 349.301 22.7841   4
  -6   2   0 335.988 25.3683   1
   7  -2   0 -1.4374 3.39415   3
  -7  -2   0 -0.0882 3.30129   6
  -7  -2   0 1.50841 2.86985   2
  -7  -2   0 1.02997 3.04325   1
  -7   2   0 6.98102 3.21564   2
   7   2   0 0.06304 3.67580   3
  -7   2   0 -0.3447 3.03239   6
  -7   2   0 -2.7405 2.68988   1
  -8  -2   0 54.4801 7.86879   1
  -8  -2   0 34.3348 6.16739   6
  -8  -2   0 29.5382 5.56343   2
   8   2   0 27.9059 6.20930   3
  -8   2   0 28.9473 5.69730   2
  -8   2   0 37.6208 5.92509   6
  -8   2   0 37.3275 6.28219   1
  -9  -2   0 2.79338 3.57980   1
  -9  -2   0 3.50173 3.96129   6
  -9  -2   0 2.21437 3.43953   2
  -9   2   0 9.86217 4.41473   6
   9   2   0 4.89165 4.75639   3
  -9   2   0 2.68017 3.76084   1
   0  -3   0 1.35279 2.31665   7
   0  -3   0 1.28935 1.91836   4
   0  -3   0 1.53372 1.27989   3
   0  -3   0 -0.5190 1.41359   6
   0  -3   0 0.16954 1.94595   5
   0  -3   0 0.81686 2.26887   7
   0  -3   0 0.16531 2.12861   5
   0  -3   0 3.69958 2.03820   1
   0  -3   0 1.34184 1.71698   4
   0  -3   0 3.21904 1.90493   2
   0   3   0 0.16756 1.32724   3
   0   3   0 0.26752 1.73413   6
   0   3   0 1.02449 1.91409   7
   0   3   0 -0.2731 1.95927   7
   0   3   0 0.69795 1.94953   1
   0   3   0 -0.5816 1.70939   2
  -1  -3   0 63.9976 5.79613   1
   1  -3   0 61.4914 5.45787   2
  -1  -3   0 59.5495 5.95466   7
   1  -3   0 59.6850 5.77480   4
   1  -3   0 63.3105 5.45699   4
  -1  -3   0 56.2052 5.61457   5
   1  -3   0 66.1839 5.86336   5
  -1  -3   0 75.8693 6.14017   2
  -1  -3   0 68.7487 6.38984   3
   1  -3   0 69.3488 4.95027   6
  -1  -3   0 55.5746 5.74610   7
   1  -3   0 63.3575 6.15285   7
   1  -3   0 50.1163 5.93291   7
   1  -3   0 65.1839 5.74197   1
  -1   3   0 66.0274 5.00536   6
   1   3   0 67.3420 6.02340   2
   1   3   0 54.5293 6.00894   7
  -1   3   0 57.4429 5.53875   4
   1   3   0 56.2679 5.75256   7
  -1   3   0 72.4791 6.36798   7
  -1   3   0 71.8644 5.85901   1
   1   3   0 68.1907 6.44552   3
  -1   3   0 61.2010 5.81666   5
   1   3   0 64.0295 6.02395   1
  -1   3   0 63.5858 5.85555   4
  -1   3   0 59.8268 5.94110   7
  -1   3   0 69.4772 5.47834   2
   2  -3   0 528.327 34.5045   6
   2  -3   0 503.472 35.0506   7
   2  -3   0 484.647 34.7787   2
  -2  -3   0 529.883 34.7342   5
  -2  -3   0 532.799 34.9326   7
   2  -3   0 494.112 34.6838   5
   2  -3   0 506.901 34.4025   4
  -2  -3   0 520.083 35.2478   2
  -2  -3   0 528.715 34.7898   7
   2  -3   0 521.447 34.5176   4
  -2   3   0 547.688 34.7375   4
   2   3   0 519.258 35.6342   3
  -2   3   0 545.254 34.4641   3
  -2   3   0 512.534 34.3441   6
  -2   3   0 518.862 35.0246   7
  -2   3   0 527.942 34.7291   2
   2   3   0 533.782 34.8359   7
  -2   3   0 531.505 34.6816   4
  -2   3   0 527.665 35.1374   1
  -2   3   0 527.130 34.8966   7
  -3  -3   0 25.3391 4.35443   2
  -3  -3   0 20.9444 3.18176   7
   3  -3   0 23.4407 3.01270   5
  -3  -3   0 16.6703 2.83478   5
   3  -3   0 20.8653 3.79702   6
  -3  -3   0 29.5998 3.35147   7
   3  -3   0 26.5644 3.80916   3
   3  -3   0 26.2569 3.74687   7
  -3   3   0 29.1731 4.44251   1
  -3   3   0 21.8736 3.04058   4
  -3   3   0 22.7365 3.67574   3
  -3   3   0 23.8339 3.15405   4
  -3   3   0 34.2326 3.79793   6
   3   3   0 15.4632 4.48405   3
  -4  -3   0 200.908 13.7105   5
  -4  -3   0 196.743 13.5793   7
   4  -3   0 191.115 14.6584   3
  -4  -3   0 206.224 13.7058   5
  -4  -3   0 192.102 15.0666   2
  -4  -3   0 207.249 13.5787   7
   4   3   0 197.421 15.7033   3
  -4   3   0 188.646 14.9690   1
  -4   3   0 192.855 14.4008   6
  -4   3   0 189.032 13.6400   4
  -4   3   0 190.518 13.7192   4
   5  -3   0 13.8750 3.61038   3
  -5  -3   0 11.3733 3.66762   2
  -5  -3   0 11.8899 1.90108   5
   5  -3   0 8.03116 2.21145   7
  -5  -3   0 10.8005 1.91545   5
  -5   3   0 7.57802 3.32017   1
  -5   3   0 2.19166 2.62123   6
  -5   3   0 8.09190 1.87093   4
  -5   3   0 6.76408 1.84119   4
   5   3   0 9.21279 4.22916   3
  -6  -3   0 74.8575 8.79470   2
  -6  -3   0 74.6969 5.93038   5
   6  -3   0 85.0212 8.41097   3
  -6  -3   0 94.5444 10.0770   6
  -6  -3   0 79.5982 6.00058   5
  -6   3   0 89.8116 7.99627   6
   6   3   0 111.154 11.0810   3
  -6   3   0 84.8027 6.47683   4
  -6   3   0 88.8830 9.46289   1
  -7  -3   0 -1.1700 3.09366   6
  -7  -3   0 0.78733 3.35342   2
  -7   3   0 1.12518 2.68305   6
  -7   3   0 0.94743 3.01467   1
   7   3   0 -0.0031 3.80761   3
  -8  -3   0 8.86739 4.04023   1
  -8  -3   0 1.41990 3.08369   2
  -8  -3   0 9.52728 4.54518   6
  -8   3   0 8.45515 3.40154   6
   8   3   0 10.1690 5.00135   3
  -8   3   0 8.35700 3.78888   1
  -8   3   0 10.4487 3.73577   2
  -9  -3   0 10.8316 4.55045   6
  -9  -3   0 8.42343 4.15524   1
  -9  -3   0 5.88079 3.57327   2
   9   3   0 9.96630 4.87116   3
  -9   3   0 5.78441 3.74722   1
   0  -4   0 1605.34 107.034   7
   0  -4   0 1733.62 106.855   5
   0  -4   0 1640.00 106.691   4
   0  -4   0 1628.35 105.771   3
   0  -4   0 1593.25 106.042   6
   0  -4   0 1636.38 106.677   5
   0  -4   0 1664.76 106.397   2
   0  -4   0 1651.55 106.894   7
   0   4   0 1607.80 106.837   7
   0   4   0 1698.86 106.392   2
   0   4   0 1604.76 106.158   6
   0   4   0 1609.12 105.889   3
   0   4   0 1582.94 106.341   1
   0   4   0 1664.64 107.079   7
  -1  -4   0 49.3341 5.71076   5
   1  -4   0 53.2895 6.08069   4
  -1  -4   0 53.4067 6.22923   7
   1  -4   0 64.9534 4.80180   6
  -1  -4   0 53.8398 5.81047   3
   1  -4   0 45.3188 5.83682   4
   1  -4   0 42.1514 5.53726   5
  -1  -4   0 54.1817 6.37730   7
   1  -4   0 48.9345 5.89937   5
   1  -4   0 57.9092 5.45187   2
  -1  -4   0 50.0240 5.85530   2
   1  -4   0 64.5622 6.90259   7
  -1   4   0 66.0096 5.70884   2
  -1   4   0 65.7632 6.87905   7
  -1   4   0 64.1543 4.84080   6
   1   4   0 62.7542 5.94038   1
   1   4   0 58.3294 6.47744   7
  -1   4   0 58.0844 6.37109   7
  -1   4   0 56.9926 5.88106   4
  -1   4   0 78.4891 5.88851   1
   1   4   0 50.2397 5.80994   3
  -2  -4   0 835.897 57.4867   5
   2  -4   0 890.230 57.2960   4
   2  -4   0 874.518 56.9151   6
   2  -4   0 806.238 57.2484   2
  -2  -4   0 859.152 57.6215   7
   2  -4   0 870.674 57.5340   5
   2  -4   0 884.267 57.3253   4
  -2  -4   0 838.207 57.7031   7
  -2  -4   0 878.760 57.8909   2
   2  -4   0 863.296 57.9562   7
   2   4   0 867.680 58.0273   3
  -2   4   0 911.009 57.4468   4
   2   4   0 839.157 57.5465   7
  -2   4   0 898.358 56.7945   6
  -2   4   0 886.291 57.6509   1
  -2   4   0 910.702 57.9751   7
  -2   4   0 900.588 57.7157   7
  -2   4   0 870.082 56.6912   3
   3  -4   0 24.5903 2.83418   4
   3  -4   0 27.2678 4.16260   7
   3  -4   0 23.6762 3.39399   5
  -3  -4   0 18.1391 4.20350   2
  -3  -4   0 23.9700 3.40385   5
   3  -4   0 17.9892 2.71077   4
   3  -4   0 25.2266 3.79830   6
  -3  -4   0 22.3603 3.71409   7
  -3  -4   0 21.5220 3.52444   7
  -3   4   0 25.5181 3.15497   6
  -3   4   0 24.5350 4.13092   1
  -3   4   0 18.0132 3.66423   7
  -3   4   0 23.3305 3.52943   3
  -3   4   0 22.7215 3.75521   7
   3   4   0 22.1205 3.65286   7
   3   4   0 22.1478 4.74947   3
  -3   4   0 22.3709 3.53383   4
  -4  -4   0 137.878 10.6081   5
  -4  -4   0 148.014 11.7691   2
  -4  -4   0 145.002 10.5961   7
   4  -4   0 144.890 11.0301   7
  -4  -4   0 157.274 10.7644   7
  -4  -4   0 147.620 10.5744   5
  -4   4   0 147.098 10.6890   4
   4   4   0 106.280 11.7004   3
  -4   4   0 130.125 10.6517   6
  -4   4   0 144.902 12.0214   1
  -5  -4   0 14.8811 4.10214   2
  -5  -4   0 14.9005 2.29785   7
  -5  -4   0 14.8867 2.62377   5
  -5  -4   0 10.7927 2.34543   5
  -5  -4   0 13.5950 2.18600   7
  -5   4   0 15.4364 4.02491   1
  -5   4   0 16.6556 3.25625   6
   5   4   0 21.9197 5.58784   3
  -5   4   0 13.4820 2.73450   4
  -6  -4   0 37.5712 3.59580   5
  -6  -4   0 36.9850 3.57698   5
  -6  -4   0 33.7460 5.76155   2
  -6   4   0 28.9129 5.61026   1
  -6   4   0 27.6535 3.66875   4
   6   4   0 23.2859 5.96873   3
  -6   4   0 28.2225 4.66815   6
  -7  -4   0 6.71588 1.45695   5
  -7  -4   0 4.39359 3.61597   2
  -7  -4   0 8.72974 4.31437   6
  -7  -4   0 5.34684 1.47220   5
   7   4   0 4.87029 4.22290   3
  -7   4   0 4.99098 3.67003   1
  -7   4   0 7.78790 3.21163   6
  -8  -4   0 50.0403 7.75271   6
  -8  -4   0 41.9545 6.66377   2
  -8  -4   0 46.9775 7.26735   1
  -8   4   0 36.1618 6.48359   1
   8   4   0 50.4106 8.20590   3
  -8   4   0 44.2143 6.31945   6
  -9  -4   0 4.21522 3.42325   2
  -9  -4   0 0.11149 3.60303   1
  -9  -4   0 3.84109 3.89697   6
   9   4   0 0.18351 4.47120   3
  -9   4   0 -0.2552 3.10622   1
   0  -5   0 -1.1265 2.85620   7
   0  -5   0 2.05688 2.71425   2
   0  -5   0 2.56384 2.77815   5
   0  -5   0 0.31675 1.50848   3
   0  -5   0 -3.0587 2.35373   4
   0  -5   0 -0.4792 2.37869   5
   0   5   0 -1.5550 1.84483   6
   0   5   0 -1.1118 3.03546   7
   0   5   0 1.67096 2.34012   1
   0   5   0 1.37950 1.82709   3
  -1  -5   0 16.8534 3.88696   5
   1  -5   0 18.1340 3.84491   5
   1  -5   0 21.8015 4.44828   7
   1  -5   0 18.0050 3.63557   2
  -1  -5   0 21.9856 4.00775   7
  -1  -5   0 17.5600 3.82444   4
  -1  -5   0 19.2408 4.37597   7
   1  -5   0 16.1355 3.71751   4
  -1  -5   0 16.3684 3.85006   2
  -1  -5   0 17.6357 3.77553   5
   1  -5   0 15.0098 2.58871   6
  -1   5   0 29.2982 4.08339   1
  -1   5   0 25.7661 3.06210   6
  -1   5   0 27.2954 4.57682   7
  -1   5   0 23.2526 2.17707   3
   1   5   0 22.0058 3.90341   3
   1   5   0 20.9686 4.34261   7
   1   5   0 23.3647 3.99023   1
  -2  -5   0 258.237 17.9032   5
  -2  -5   0 243.749 18.1986   2
  -2  -5   0 274.641 18.1112   5
   2  -5   0 238.015 18.3091   7
  -2  -5   0 246.237 18.1041   7
  -2  -5   0 246.936 18.2647   7
   2  -5   0 244.848 16.9499   6
   2  -5   0 252.947 17.8453   4
   2  -5   0 242.336 17.5892   2
  -2   5   0 240.865 17.8268   1
   2   5   0 246.643 18.0911   7
   2   5   0 261.142 18.3980   1
  -2   5   0 237.099 16.8299   6
  -2   5   0 226.612 18.3419   7
  -2   5   0 248.515 17.7603   4
  -2   5   0 250.588 16.5582   3
  -2   5   0 259.062 18.2769   7
   2   5   0 255.163 18.2845   3
  -3  -5   0 50.9150 5.85037   5
  -3  -5   0 54.6618 6.81802   2
  -3  -5   0 74.1809 6.57221   7
  -3  -5   0 65.2520 6.47221   5
   3  -5   0 57.4739 5.41281   4
   3  -5   0 53.7017 6.20418   2
   3  -5   0 60.3430 6.72459   7
   3  -5   0 55.9621 5.35081   4
  -3  -5   0 71.1779 6.37632   7
   3  -5   0 64.4635 5.92487   5
  -3   5   0 55.9388 6.47216   1
  -3   5   0 41.3714 5.76697   7
  -3   5   0 55.2667 5.06633   3
  -3   5   0 46.6570 5.87167   4
   3   5   0 65.9129 7.85458   3
  -3   5   0 54.1852 6.57482   7
  -3   5   0 57.3667 4.98740   6
   3   5   0 43.4657 5.77335   7
   4  -5   0 325.880 21.2882   4
  -4  -5   0 325.498 22.7130   7
  -4  -5   0 337.589 22.6046   5
   4  -5   0 315.058 22.9013   7
  -4  -5   0 296.519 22.3650   5
  -4  -5   0 320.185 23.6026   2
  -4  -5   0 326.384 22.5370   7
   4  -5   0 334.998 21.2961   4
   4   5   0 317.782 24.0318   3
  -4   5   0 335.285 22.5116   4
  -4   5   0 314.590 22.1419   6
  -4   5   0 325.416 23.2433   1
  -5  -5   0 21.0156 3.36138   7
  -5  -5   0 20.0593 4.44472   2
  -5  -5   0 21.3995 3.22876   7
  -5  -5   0 21.3761 3.28282   5
  -5  -5   0 22.2316 3.32010   5
   5  -5   0 15.7328 3.57001   7
   5   5   0 15.5309 4.96032   3
  -5   5   0 18.4011 3.39788   6
  -5   5   0 17.1790 3.37767   4
  -5   5   0 20.6932 4.49357   1
  -6  -5   0 76.8060 5.70286   7
  -6  -5   0 74.4320 6.39308   5
  -6  -5   0 71.9674 6.38268   5
  -6  -5   0 73.1143 8.76650   2
   6   5   0 84.7312 10.0664   3
  -6   5   0 77.2569 6.68944   4
  -6   5   0 82.2302 9.19149   1
  -6   5   0 68.2656 6.90351   6
  -7  -5   0 27.3707 3.12060   5
  -7  -5   0 22.9307 5.28777   2
  -7  -5   0 27.6816 3.32174   5
  -7  -5   0 16.9570 5.32156   6
  -7   5   0 28.3181 4.37251   6
   7   5   0 31.4576 6.41943   3
  -7   5   0 27.0953 5.19746   1
  -8  -5   0 7.07623 4.42811   6
  -8  -5   0 6.37938 3.73675   2
  -8  -5   0 5.67556 1.26958   5
  -8  -5   0 4.88744 1.29368   5
  -8   5   0 6.70208 3.59663   1
   8   5   0 6.28704 5.14245   3
  -9  -5   0 4.43068 4.15244   6
  -9  -5   0 6.87526 3.89920   1
  -9  -5   0 8.51715 4.17188   2
  -9   5   0 7.58825 3.97365   1
   9   5   0 7.37154 4.59314   3
   0  -6   0 0.51273 3.25393   7
   0  -6   0 3.06607 1.78635   3
   0  -6   0 5.06272 3.11581   5
   0  -6   0 6.22339 2.78912   2
   0  -6   0 2.17975 2.70900   5
   0  -6   0 5.76626 3.01145   4
   0   6   0 3.06876 2.61557   1
   0   6   0 2.69751 2.13490   3
   0   6   0 2.06667 3.31557   7
  -1  -6   0 52.3462 6.53643   5
   1  -6   0 48.4439 5.60940   2
  -1  -6   0 58.8501 6.61885   5
   1  -6   0 51.0378 6.22356   4
  -1  -6   0 43.5106 5.82042   2
   1  -6   0 43.6489 6.12902   5
   1  -6   0 46.1267 6.70550   7
  -1  -6   0 57.6213 6.68339   4
  -1  -6   0 49.9238 6.88778   7
  -1   6   0 52.2427 4.15799   3
  -1   6   0 62.2412 6.38722   1
   1   6   0 56.0381 6.17761   1
  -1   6   0 55.9064 5.06526   6
   1   6   0 43.1112 5.63905   3
   1   6   0 65.7416 7.16937   7
  -1   6   0 48.6823 6.58084   7
   2  -6   0 803.400 56.0330   7
   2  -6   0 829.667 55.2463   2
  -2  -6   0 806.676 56.3568   7
   2  -6   0 824.633 55.4495   4
  -2  -6   0 842.080 55.6492   4
  -2  -6   0 793.878 55.6092   2
   2  -6   0 744.433 54.6613   6
  -2  -6   0 823.075 55.7145   5
  -2  -6   0 806.251 55.6529   5
  -2  -6   0 804.132 56.1175   7
  -2   6   0 862.656 55.4535   4
  -2   6   0 825.514 55.4681   1
  -2   6   0 833.252 53.9020   3
  -2   6   0 896.981 54.5580   6
  -2   6   0 871.436 56.0110   7
   2   6   0 856.143 55.8503   7
   2   6   0 874.065 55.8915   1
   2   6   0 884.011 55.9303   3
   3  -6   0 59.1806 7.26866   7
  -3  -6   0 56.3395 6.61617   5
  -3  -6   0 70.6807 7.36218   7
   3  -6   0 54.3730 6.44164   5
  -3  -6   0 65.8531 7.35084   7
  -3  -6   0 68.6645 7.08884   5
   3  -6   0 71.0573 6.65833   2
   3  -6   0 66.7988 6.33507   4
  -3  -6   0 63.1207 7.50925   2
   3   6   0 58.6889 6.86317   7
  -3   6   0 63.9406 7.24192   7
  -3   6   0 60.3405 7.09394   1
   3   6   0 65.5970 8.19618   3
  -3   6   0 63.0513 5.21071   3
  -3   6   0 67.9117 6.42306   4
  -3   6   0 48.0138 6.85895   7
  -3   6   0 64.9432 5.41434   6
   4  -6   0 298.409 20.4731   7
  -4  -6   0 284.538 19.9210   7
   4  -6   0 271.584 18.8432   4
   4  -6   0 280.823 18.8904   4
  -4  -6   0 270.533 19.9105   7
  -4  -6   0 277.689 19.8176   5
  -4  -6   0 274.934 19.7307   5
  -4  -6   0 289.120 20.8546   2
   4   6   0 276.861 21.2318   3
  -4   6   0 259.156 20.1605   1
  -4   6   0 264.399 19.0079   6
  -4   6   0 278.933 19.7104   4
  -5  -6   0 6.43290 2.57194   5
  -5  -6   0 8.66153 2.47197   5
  -5  -6   0 3.43308 3.76242   2
  -5  -6   0 3.58603 2.52180   7
   5  -6   0 5.31134 3.11930   7
  -5  -6   0 5.81906 2.58827   7
  -5   6   0 12.0728 3.70619   1
  -5   6   0 7.55092 2.66144   4
  -5   6   0 7.49434 2.47926   6
   5   6   0 17.8179 5.34887   3
  -6  -6   0 8.45889 2.80815   4
  -6  -6   0 9.84227 2.79459   5
  -6  -6   0 10.5230 4.21740   2
  -6  -6   0 9.80031 2.89362   5
  -6  -6   0 15.4881 2.88096   7
  -6   6   0 15.2037 3.26557   4
   6   6   0 12.0942 4.93042   3
  -6   6   0 18.8421 3.54880   6
  -6   6   0 19.4220 4.39605   1
  -7  -6   0 1.55933 3.21219   2
  -7  -6   0 2.99654 1.84467   5
  -7  -6   0 2.62039 1.85482   5
  -7   6   0 5.56026 3.31451   1
   7   6   0 0.46421 4.02531   3
  -8  -6   0 29.0134 3.33013   5
  -8  -6   0 24.8451 6.22498   6
  -8  -6   0 33.0648 3.47905   5
  -8  -6   0 24.7998 5.28062   2
   8   6   0 30.4299 6.72715   3
  -8   6   0 45.9758 6.44904   1
  -9  -6   0 -0.0053 4.45937   6
  -9  -6   0 3.70309 3.81936   2
  -9   6   0 1.33052 3.32971   1
   9   6   0 6.90518 4.40461   3
   0  -7   0 0.35323 1.61000   3
   0  -7   0 1.66041 3.09405   5
   0  -7   0 0.02240 3.45400   7
   0  -7   0 -2.8060 2.74720   4
   0  -7   0 -0.4483 2.65004   2
   0  -7   0 0.36519 3.00079   5
   0   7   0 -3.3709 2.93258   7
   0   7   0 0.20497 2.73536   1
   0   7   0 2.31462 2.08116   3
  -1  -7   0 50.4258 8.03345   7
  -1  -7   0 58.3840 7.44170   4
  -1  -7   0 62.2867 7.26379   5
   1  -7   0 59.0883 7.11872   4
   1  -7   0 43.5161 7.14404   7
   1  -7   0 53.8206 7.20748   5
   1  -7   0 52.1324 6.47626   2
  -1  -7   0 59.8131 7.06813   2
  -1  -7   0 64.3782 7.61281   5
   1   7   0 69.4762 7.23593   1
  -1   7   0 68.6436 7.28399   1
   1   7   0 62.8565 7.67365   7
  -1   7   0 64.9830 5.91891   6
   1   7   0 74.5144 7.30401   3
  -1   7   0 69.6877 5.10928   3
  -1   7   0 67.9928 7.83451   7
  -2  -7   0 288.823 20.8659   4
   2  -7   0 249.907 21.0777   7
   2  -7   0 297.266 21.0746   4
  -2  -7   0 285.389 20.9845   5
   2  -7   0 285.213 20.4755   2
  -2  -7   0 274.736 21.3736   7
  -2  -7   0 286.195 20.8867   5
   2  -7   0 272.110 20.7977   5
  -2  -7   0 272.209 20.8033   2
   2   7   0 300.793 21.2029   7
  -2   7   0 308.326 20.8282   1
   2   7   0 283.074 20.9303   1
  -2   7   0 303.697 21.4067   7
  -2   7   0 295.945 19.6038   6
   2   7   0 291.480 21.1203   3
  -2   7   0 283.132 18.6966   3
   3  -7   0 5.23521 2.69448   5
  -3  -7   0 5.69747 3.40662   2
  -3  -7   0 1.98255 2.62338   4
  -3  -7   0 4.16062 3.39450   7
  -3  -7   0 4.69991 3.51304   7
  -3  -7   0 8.62430 3.35425   5
   3  -7   0 4.25219 2.64054   4
   3  -7   0 14.8190 3.91899   7
  -3  -7   0 2.73833 2.62033   5
   3  -7   0 4.44053 3.02100   2
  -3   7   0 6.34495 3.23095   1
   3   7   0 4.20451 3.41443   3
  -3   7   0 8.21586 3.00319   4
   3   7   0 2.24450 2.98533   7
  -3   7   0 5.30574 1.49862   3
  -3   7   0 4.80107 1.87635   6
  -3   7   0 3.97715 3.22356   7
   4  -7   0 201.813 13.9209   4
  -4  -7   0 198.780 14.7836   4
  -4  -7   0 190.088 14.7232   7
  -4  -7   0 205.488 14.7142   7
  -4  -7   0 194.135 14.6382   5
   4  -7   0 230.028 15.7311   7
  -4  -7   0 188.072 15.2499   2
  -4  -7   0 195.999 14.6837   5
   4  -7   0 195.902 14.4745   5
  -4   7   0 185.367 13.4220   3
  -4   7   0 165.570 14.5707   1
  -4   7   0 190.147 14.6292   4
  -4   7   0 179.658 13.4807   6
   4   7   0 158.249 15.3319   3
  -5  -7   0 2.66081 2.47224   4
   5  -7   0 4.40630 3.11305   7
  -5  -7   0 3.70799 2.36540   5
  -5  -7   0 2.88455 3.31559   2
  -5  -7   0 6.09946 2.92677   7
  -5  -7   0 3.06591 2.42425   5
   5   7   0 0.65902 4.08401   3
  -5   7   0 5.45339 2.76206   4
  -5   7   0 2.59262 2.00742   6
  -5   7   0 5.54140 3.19446   1
  -6  -7   0 54.5898 6.17927   5
  -6  -7   0 63.6340 6.08603   7
  -6  -7   0 58.3404 7.81192   2
  -6  -7   0 59.1524 6.29017   5
  -6  -7   0 56.6686 6.46096   4
  -6   7   0 59.0137 7.55056   1
  -6   7   0 57.4970 5.94690   6
   6   7   0 60.1152 9.00191   3
  -6   7   0 58.7440 6.59590   4
  -7  -7   0 11.8435 4.57568   2
  -7  -7   0 8.42412 2.70074   5
   7   7   0 21.7804 5.84588   3
  -7   7   0 13.2602 4.01761   1
  -8  -7   0 22.0537 5.93336   6
  -8  -7   0 20.1556 3.03182   5
  -8  -7   0 27.2934 5.40919   2
  -8   7   0 14.9581 4.58908   1
   8   7   0 21.6241 5.99581   3
  -9  -7   0 13.0786 5.29847   6
  -9  -7   0 7.95879 1.60045   5
  -9  -7   0 4.83886 3.99734   2
   9   7   0 3.38107 3.82605   3
  -9   7   0 7.58789 4.21492   1
   0  -8   0 1305.06 85.8475   7
   0  -8   0 1303.57 84.5547   2
   0  -8   0 1292.20 85.1523   4
   0  -8   0 1291.21 85.2498   5
   0   8   0 1244.04 83.7069   3
   0   8   0 1261.24 84.6002   1
   0   8   0 1292.27 85.4342   7
  -1  -8   0 6.63825 3.28632   5
   1  -8   0 12.5946 3.39553   2
   1  -8   0 9.92130 3.76292   4
  -1  -8   0 10.8271 3.60804   4
  -1  -8   0 8.45166 3.60052   2
  -1  -8   0 8.12947 4.10053   7
   1  -8   0 5.64719 3.38188   5
  -1  -8   0 5.08019 3.37306   5
   1  -8   0 14.2914 4.43807   7
   1   8   0 1.71151 2.82917   3
  -1   8   0 4.54968 3.50395   7
  -1   8   0 4.34935 2.55523   6
   1   8   0 9.42785 4.11356   7
  -1   8   0 9.59198 3.42280   1
   1   8   0 3.71153 2.92422   1
  -1   8   0 7.79096 1.86259   3
  -2  -8   0 371.718 27.1342   7
  -2  -8   0 388.040 26.7626   4
   2  -8   0 390.298 27.4432   7
  -2  -8   0 380.412 26.8574   5
   2  -8   0 395.648 26.6606   4
   2  -8   0 388.188 26.2145   2
  -2  -8   0 367.029 26.5088   2
  -2  -8   0 373.039 26.6519   5
   2  -8   0 395.776 26.7320   5
  -2   8   0 363.976 26.3372   1
  -2   8   0 356.504 26.9026   7
  -2   8   0 354.123 25.2669   6
   2   8   0 364.092 26.8674   7
   2   8   0 374.982 26.7799   1
   2   8   0 330.925 26.3193   3
  -2   8   0 375.673 24.2227   3
   3  -8   0 48.2335 7.13729   7
  -3  -8   0 53.1683 6.71826   4
   3  -8   0 50.2786 6.28002   2
   3  -8   0 51.8471 6.22255   4
  -3  -8   0 45.7831 6.64343   2
  -3  -8   0 49.9206 6.33592   5
  -3  -8   0 45.0318 6.87206   7
  -3  -8   0 55.4561 6.86785   5
  -3   8   0 42.7954 6.26070   1
  -3   8   0 50.6326 4.71598   6
  -3   8   0 51.9899 3.77502   3
   3   8   0 35.9137 6.46691   3
   3   8   0 51.7935 6.99106   1
   3   8   0 50.3259 6.75252   7
  -3   8   0 52.3762 7.12084   7
   4  -8   0 188.426 15.9768   7
   4  -8   0 203.215 14.9345   4
  -4  -8   0 199.376 15.5384   4
  -4  -8   0 186.084 15.4432   5
  -4  -8   0 191.856 15.4721   5
  -4  -8   0 201.049 16.0298   7
  -4  -8   0 189.391 16.0041   2
   4  -8   0 194.890 15.4608   2
  -4  -8   0 202.219 16.0981   7
  -4   8   0 199.910 14.2189   6
  -4   8   0 221.382 14.0851   3
  -4   8   0 208.412 15.8225   1
   4   8   0 193.032 16.3979   3
  -4   8   0 228.889 15.7003   4
  -5  -8   0 26.9606 5.58334   2
  -5  -8   0 23.3135 4.56293   7
  -5  -8   0 20.0799 3.97312   5
  -5  -8   0 18.5041 4.07516   5
  -5  -8   0 17.2507 4.12648   4
  -5   8   0 25.0986 4.42865   4
  -5   8   0 23.8168 3.42488   6
  -5   8   0 32.6136 5.30647   1
   5   8   0 29.4027 6.15211   3
  -6  -8   0 26.5789 4.24843   5
  -6  -8   0 24.1233 5.36756   2
  -6  -8   0 22.4201 4.17801   4
  -6  -8   0 23.5393 4.30461   7
  -6   8   0 26.5498 5.25614   1
   6   8   0 27.7270 6.28028   3
  -6   8   0 27.7200 4.50996   4
  -7  -8   0 8.87887 4.06487   2
  -7  -8   0 5.94337 2.62407   7
  -7  -8   0 7.12445 2.65933   5
   7   8   0 10.6486 5.02513   3
  -7   8   0 10.1895 3.81679   1
  -8  -8   0 57.3059 8.49334   6
  -8  -8   0 44.7309 4.87151   5
  -8  -8   0 48.4199 7.06909   2
  -8   8   0 33.0538 6.19456   1
   8   8   0 35.7023 7.32773   3
  -9  -8   0 6.02905 4.56448   6
  -9  -8   0 3.79702 1.72594   5
  -9  -8   0 2.37234 3.52794   2
  -9   8   0 1.33215 3.54031   1
   9   8   0 -1.3707 4.28245   3
   0  -9   0 4.11248 3.10604   5
   0  -9   0 1.11947 3.10954   4
   0  -9   0 -3.0698 2.74270   2
   0  -9   0 -1.5455 2.72276   7
   0   9   0 -0.8775 2.87297   1
   0   9   0 0.48120 3.27632   7
   0   9   0 -0.9013 2.11037   3
  -1  -9   0 41.8755 6.11341   5
   1  -9   0 33.3768 6.27560   7
  -1  -9   0 39.9923 6.05728   2
  -1  -9   0 43.0085 6.01018   5
   1  -9   0 32.7321 5.74201   4
   1  -9   0 33.7667 5.77247   5
  -1  -9   0 39.7203 6.25471   4
   1  -9   0 37.7786 5.58811   2
  -1  -9   0 32.2896 6.18111   7
  -1   9   0 39.5855 3.89490   3
  -1   9   0 37.7300 4.76293   6
   1   9   0 29.8998 5.78314   7
   1   9   0 35.6753 5.58683   1
  -1   9   0 35.6033 5.57656   1
   1   9   0 35.7440 5.22512   3
  -1   9   0 34.2614 6.11858   7
  -2  -9   0 51.1928 6.28884   2
  -2  -9   0 41.4663 6.54954   7
   2  -9   0 54.9433 6.59185   5
   2  -9   0 34.3936 6.24388   7
  -2  -9   0 41.9025 6.24061   5
  -2  -9   0 40.1967 5.99418   4
   2  -9   0 38.4192 5.86137   4
   2  -9   0 51.4799 6.06582   2
  -2  -9   0 41.8098 5.95507   5
  -2   9   0 20.0010 5.11145   7
   2   9   0 25.3704 5.55602   7
  -2   9   0 26.6070 4.16846   6
   2   9   0 30.1747 5.58275   3
   2   9   0 14.4029 4.82660   1
  -2   9   0 31.9785 5.50461   1
  -3  -9   0 15.5513 3.90808   5
   3  -9   0 16.3759 3.87453   4
  -3  -9   0 13.6589 4.14331   2
   3  -9   0 14.6534 4.78850   7
  -3  -9   0 7.47747 3.52108   5
  -3  -9   0 7.64315 4.36143   7
   3  -9   0 18.2908 4.03808   2
  -3  -9   0 27.0847 4.68376   4
   3   9   0 11.0017 4.08862   1
   3   9   0 7.99813 3.76733   7
  -3   9   0 18.5510 4.52696   7
  -3   9   0 17.1586 2.90334   6
   3   9   0 10.2061 4.21653   3
  -3   9   0 16.7139 4.35346   1
   4  -9   0 183.006 14.6044   4
  -4  -9   0 186.902 15.2511   5
  -4  -9   0 177.469 15.4440   2
   4  -9   0 191.892 15.9156   7
  -4  -9   0 183.883 15.7044   7
  -4  -9   0 184.707 15.1875   4
   4  -9   0 193.106 15.0114   2
   4   9   0 191.689 15.8655   3
  -4   9   0 218.051 15.7122   1
  -4   9   0 215.027 13.9459   6
  -5  -9   0 4.13942 3.30179   5
  -5  -9   0 19.9121 4.30650   7
  -5  -9   0 11.8199 4.17342   2
  -5  -9   0 8.70464 3.47688   4
  -5   9   0 9.68882 2.52364   6
  -5   9   0 12.5128 4.54974   1
   5   9   0 16.0963 5.12828   3
  -6  -9   0 36.0961 6.56450   2
  -6  -9   0 46.2356 6.13714   4
  -6  -9   0 44.8636 5.92886   7
  -6  -9   0 44.1068 5.78458   5
   6   9   0 48.5071 7.85272   3
  -6   9   0 39.7955 6.60384   1
  -7  -9   0 1.90508 2.32158   7
  -7  -9   0 7.09300 3.03881   5
  -7  -9   0 4.36748 3.89374   2
   7   9   0 5.43006 4.59859   3
  -7   9   0 4.66560 3.77819   1
  -8  -9   0 12.4055 4.90302   2
  -8  -9   0 6.25668 2.66758   5
  -8   9   0 7.93524 4.09262   1
   8   9   0 3.24707 3.88225   3
   0 -10   0 295.477 22.9884   7
   0 -10   0 316.457 21.9113   2
   0 -10   0 287.900 22.2836   5
   0 -10   0 287.377 22.0980   4
   0  10   0 324.116 23.0151   7
   0  10   0 278.932 21.5421   1
   0  10   0 291.198 20.7279   3
  -1 -10   0 8.64627 3.67230   2
  -1 -10   0 9.83613 4.08304   4
   1 -10   0 13.4595 5.00849   7
   1 -10   0 8.47283 3.79609   5
  -1 -10   0 9.05001 3.84493   5
   1 -10   0 6.91131 3.31463   2
  -1 -10   0 6.71630 4.25233   7
   1 -10   0 10.1317 3.80469   4
   1  10   0 5.29582 4.04430   7
  -1  10   0 10.1119 2.32175   3
  -1  10   0 4.74401 3.63700   7
  -1  10   0 6.97774 3.60694   1
   1  10   0 9.64018 3.39299   3
   1  10   0 12.7729 3.87936   1
  -2 -10   0 16.0703 5.10514   7
   2 -10   0 15.3789 4.43809   5
  -2 -10   0 17.8545 4.67256   4
   2 -10   0 24.0708 5.26267   4
   2 -10   0 17.0492 5.31556   7
  -2 -10   0 18.4165 4.41661   2
  -2 -10   0 22.9236 4.94202   5
   2 -10   0 25.3846 4.77284   2
  -2 -10   0 24.1965 5.08318   5
  -2  10   0 26.3394 5.53515   7
  -2  10   0 26.5377 5.07338   1
  -2  10   0 28.4716 4.06678   6
   2  10   0 34.6220 5.92796   1
   2  10   0 31.1831 5.73085   7
   2  10   0 30.1644 5.18511   3
  -3 -10   0 100.538 9.97097   4
  -3 -10   0 101.939 10.1530   2
  -3 -10   0 106.914 10.3411   5
  -3 -10   0 101.342 11.3969   7
   3 -10   0 98.2211 9.56103   4
   3 -10   0 103.065 9.81069   2
   3 -10   0 102.440 11.6757   7
   3  10   0 112.436 10.7016   7
  -3  10   0 106.048 10.0090   1
   3  10   0 117.318 10.6628   1
  -3  10   0 123.640 10.7012   7
   3  10   0 98.1022 11.0504   3
  -3  10   0 111.950 8.45867   6
  -4 -10   0 92.8038 10.1284   7
  -4 -10   0 100.894 10.2250   4
  -4 -10   0 85.3355 9.59006   5
  -4 -10   0 86.6511 9.92888   2
   4 -10   0 77.3907 8.73090   4
   4 -10   0 95.1271 8.93329   2
   4 -10   0 75.5095 9.98210   7
  -4  10   0 101.392 7.61275   6
  -4  10   0 92.0358 9.20339   1
   4  10   0 112.054 11.4210   3
  -5 -10   0 9.32132 4.19880   2
  -5 -10   0 9.96755 3.57714   5
  -5 -10   0 7.14228 3.79529   7
  -5 -10   0 13.0718 3.85337   4
  -5  10   0 8.66323 4.06409   1
   5  10   0 12.3198 4.86101   3
  -6 -10   0 106.841 11.4984   2
  -6 -10   0 98.5589 9.98280   7
  -6 -10   0 123.808 10.2132   4
  -6 -10   0 107.358 9.89618   5
   6  10   0 122.238 13.0583   3
  -6  10   0 112.716 10.5165   1
  -7 -10   0 7.91215 3.06852   7
  -7 -10   0 3.73546 2.75718   5
  -7 -10   0 4.76998 4.25565   2
  -7  10   0 -1.4358 3.53035   1
   7  10   0 2.99987 4.37576   3
  -8 -10   0 -2.0952 2.09941   5
  -8 -10   0 -0.9942 3.45329   2
   8  10   0 2.99597 4.30770   3
  -8  10   0 4.09225 3.73936   1
   0 -11   0 1.80124 3.17755   5
   0 -11   0 -1.5057 3.44532   7
   0 -11   0 -1.8860 2.88662   4
   0 -11   0 -0.5867 3.01653   2
   0  11   0 1.07541 2.34165   3
   0  11   0 -0.1250 3.46875   7
   0  11   0 -0.3501 3.11388   1
  -1 -11   0 10.2926 4.63619   7
  -1 -11   0 15.6520 4.59861   5
   1 -11   0 11.7795 3.82603   2
   1 -11   0 15.9182 5.13912   7
  -1 -11   0 12.8253 4.13504   2
  -1 -11   0 11.7068 4.33203   4
   1 -11   0 10.4908 4.29316   4
   1 -11   0 6.23442 3.89286   5
   1  11   0 11.6332 4.67964   7
   1  11   0 7.81707 3.37115   1
  -1  11   0 8.82257 2.29809   3
  -1  11   0 4.71571 3.73560   7
   1  11   0 11.1302 3.38892   3
  -1  11   0 19.4964 4.44902   1
   2 -11   0 263.525 20.3610   5
   2 -11   0 262.986 20.5284   4
   2 -11   0 253.585 19.6921   2
  -2 -11   0 241.752 20.3513   4
  -2 -11   0 266.914 20.2267   2
   2 -11   0 258.059 21.0726   7
  -2 -11   0 262.226 20.6193   5
  -2 -11   0 252.958 20.9423   7
   2  11   0 272.177 21.0840   7
  -2  11   0 277.329 21.0031   7
  -2  11   0 275.948 20.1418   1
  -2  11   0 273.236 19.0685   6
   2  11   0 285.977 20.7357   1
   2  11   0 275.963 19.9908   3
   3 -11   0 3.82130 3.09749   2
  -3 -11   0 -3.4589 2.84731   4
  -3 -11   0 6.59771 3.59726   5
  -3 -11   0 3.94254 3.72183   7
  -3 -11   0 -1.7201 3.20703   2
   3 -11   0 -1.1458 2.67392   4
   3 -11   0 -0.4418 3.68357   7
   3  11   0 6.72112 3.69747   3
  -3  11   0 2.61952 2.20018   6
   3  11   0 -1.0495 3.35925   1
  -3  11   0 2.60827 3.60639   1
  -4 -11   0 14.7151 4.48652   5
  -4 -11   0 13.9501 4.66501   7
   4 -11   0 16.8937 4.15895   2
  -4 -11   0 21.6708 5.15943   2
  -4 -11   0 18.8725 4.91369   4
   4 -11   0 16.3622 4.17159   4
   4 -11   0 33.2934 6.21704   7
  -4  11   0 26.6824 3.59728   6
   4  11   0 12.7024 4.90407   3
  -4  11   0 30.3249 5.74929   1
  -5 -11   0 7.88380 3.54711   4
  -5 -11   0 5.79659 3.78773   7
  -5 -11   0 8.40826 3.63750   5
  -5 -11   0 3.33987 3.72208   2
  -5  11   0 6.25444 4.20188   1
   5  11   0 4.19465 4.31218   3
  -6 -11   0 4.68147 4.01446   2
  -6 -11   0 9.31514 3.96291   7
  -6 -11   0 11.4981 3.71983   5
  -6 -11   0 15.5548 4.25965   4
  -6  11   0 19.1797 4.73783   1
   6  11   0 20.3839 5.97456   3
  -7 -11   0 0.58238 2.97892   7
  -7 -11   0 1.10969 3.80148   2
  -7 -11   0 4.20474 2.88894   5
  -7  11   0 6.02172 3.95150   1
   7  11   0 10.2070 4.86469   3
  -8 -11   0 5.07985 2.63139   5
  -8 -11   0 1.87984 3.81782   2
   8  11   0 1.20986 4.95116   3
  -8  11   0 -4.9720 3.45588   1
   0 -12   0 153.483 13.2650   4
   0 -12   0 145.280 14.2640   7
   0 -12   0 140.524 12.6597   2
   0 -12   0 136.149 13.1650   5
   0  12   0 138.946 12.8027   1
   0  12   0 159.457 11.7807   3
   0  12   0 160.308 14.3492   7
   1 -12   0 42.8676 6.73010   4
   1 -12   0 32.6561 6.68002   7
  -1 -12   0 37.0399 6.44433   4
  -1 -12   0 35.8163 6.02839   2
  -1 -12   0 14.3618 5.21603   5
  -1 -12   0 45.4714 7.59932   7
   1 -12   0 40.9031 6.38616   5
   1 -12   0 23.8582 5.05133   2
   1  12   0 30.6302 5.71133   1
   1  12   0 28.6955 5.08343   3
  -1  12   0 34.2503 4.10894   3
  -1  12   0 32.2669 5.83251   1
   1  12   0 46.1275 7.29357   7
  -1  12   0 37.0290 6.78725   7
  -2 -12   0 23.9277 5.63734   2
   2 -12   0 38.4810 7.49800   7
   2 -12   0 30.0581 5.53866   2
  -2 -12   0 42.6351 6.85805   4
  -2 -12   0 24.7848 5.68986   5
  -2 -12   0 30.9426 6.52987   7
   2 -12   0 39.4255 6.43147   4
   2  12   0 45.2613 7.28239   7
   2  12   0 39.3538 6.19633   3
  -2  12   0 45.6652 7.16903   7
   2  12   0 46.1522 7.01995   1
  -2  12   0 53.7857 6.96011   1
  -3 -12   0 36.0846 6.25041   5
   3 -12   0 31.7843 5.63896   4
  -3 -12   0 29.2824 6.07613   4
  -3 -12   0 24.3086 5.37134   2
  -3 -12   0 34.0705 6.50684   7
   3 -12   0 29.0388 5.40192   2
   3 -12   0 33.6260 6.71456   7
   3  12   0 39.4875 6.58859   3
  -3  12   0 37.4651 4.51479   6
  -3  12   0 36.3484 6.22924   1
   3  12   0 28.8989 6.00292   1
   4 -12   0 63.7351 7.93538   2
  -4 -12   0 62.3096 8.05477   4
   4 -12   0 69.3591 9.30823   7
   4 -12   0 66.7415 7.92826   4
  -4 -12   0 87.5568 9.22976   5
  -4 -12   0 53.5249 8.03654   2
  -4 -12   0 74.3790 9.60008   7
  -4  12   0 72.6350 8.52086   1
   4  12   0 66.3234 9.21045   3
  -5 -12   0 22.8436 5.52985   2
   5 -12   0 35.6448 5.68591   2
  -5 -12   0 21.5163 5.20343   4
  -5 -12   0 24.6622 5.55228   7
  -5 -12   0 16.7971 4.60950   5
   5  12   0 32.1006 6.69921   3
  -5  12   0 26.8505 5.33655   1
  -6 -12   0 14.8357 4.33167   4
  -6 -12   0 8.33432 4.26077   7
  -6 -12   0 20.8399 5.18473   2
  -6 -12   0 6.68958 3.54265   5
   6  12   0 8.71804 5.47181   3
  -6  12   0 6.99025 4.05063   1
  -7 -12   0 5.57937 3.92344   2
  -7 -12   0 12.6820 3.76048   7
  -7 -12   0 10.2278 3.51025   5
   7  12   0 13.5794 5.10903   3
  -7  12   0 9.09019 4.29895   1
   0 -13   0 -2.1342 3.63904   2
   0 -13   0 1.38969 4.08670   7
   0 -13   0 -0.0498 3.20582   5
   0 -13   0 -0.3378 3.21341   4
   0  13   0 3.54983 4.26951   7
   0  13   0 -1.1172 3.36363   1
   0  13   0 0.03170 2.52557   3
  -1 -13   0 25.5304 5.66769   5
  -1 -13   0 21.6316 5.38717   4
   1 -13   0 31.4752 6.32101   4
  -1 -13   0 29.4953 5.58976   2
   1 -13   0 23.0288 6.14583   7
   1 -13   0 27.5026 5.43088   2
  -1 -13   0 27.9447 6.48128   7
  -1  13   0 20.9215 5.81909   7
   1  13   0 23.7653 5.46780   1
  -1  13   0 22.9046 5.26439   1
   1  13   0 38.7010 5.33089   3
   1  13   0 25.3502 6.06342   7
   2 -13   0 8.20417 3.88187   2
   2 -13   0 8.58335 4.47917   4
  -2 -13   0 10.0588 4.54887   4
   2 -13   0 -1.5195 3.83381   7
  -2 -13   0 9.04061 4.61365   7
  -2 -13   0 4.84318 3.97015   2
  -2 -13   0 5.58873 3.97566   5
   2  13   0 14.1743 4.07359   3
  -2  13   0 13.1080 4.49556   1
   2  13   0 11.3763 4.75070   1
   3 -13   0 6.30568 3.35299   4
  -3 -13   0 -0.3025 3.40992   2
   3 -13   0 4.73797 3.59908   2
   3 -13   0 2.68532 4.14049   7
  -3 -13   0 7.07817 3.88285   5
  -3 -13   0 -0.1052 3.33831   4
  -3 -13   0 5.52994 4.31623   7
   3  13   0 5.84564 3.97669   3
   3  13   0 1.86668 3.82880   1
  -3  13   0 -1.7354 3.40611   1
  -4 -13   0 21.2558 5.16931   5
   4 -13   0 28.5525 5.07172   2
   4 -13   0 17.4857 5.51502   7
   4 -13   0 25.1058 5.03585   4
  -4 -13   0 21.3602 5.42495   4
  -4 -13   0 28.4099 6.44354   7
  -4 -13   0 20.8912 5.32464   2
   4  13   0 29.5875 5.84233   3
  -4  13   0 27.4727 5.84149   1
  -5 -13   0 32.2019 5.66441   4
  -5 -13   0 22.4488 5.47906   2
  -5 -13   0 26.5097 5.27120   5
   5 -13   0 24.5086 5.05160   2
  -5 -13   0 19.8217 5.16236   7
   5  13   0 36.6652 7.02676   3
  -5  13   0 15.8656 4.90422   1
  -6 -13   0 9.22215 4.17247   4
  -6 -13   0 6.99000 3.86667   7
  -6 -13   0 8.85866 3.67877   5
  -6 -13   0 13.5435 4.96859   2
   6  13   0 0.74257 4.68504   3
  -6  13   0 6.59284 4.36944   1
  -7 -13   0 3.06412 3.97546   2
  -7 -13   0 1.48686 3.29097   7
  -7 -13   0 3.70799 3.13333   5
  -7  13   0 7.42559 3.95537   1
   7  13   0 3.25379 4.46028   3
   0 -14   0 66.1815 9.17503   5
   0 -14   0 79.8525 10.7259   7
   0 -14   0 67.3648 9.12468   4
   0 -14   0 73.5641 8.92233   2
   0  14   0 73.8610 8.90218   1
  -1 -14   0 28.4369 6.59842   7
   1 -14   0 20.1591 6.19468   7
   1 -14   0 16.9440 4.76220   2
  -1 -14   0 16.2582 4.97083   5
   1 -14   0 21.4678 5.38333   4
  -1 -14   0 13.1164 4.76514   2
  -1 -14   0 31.0704 6.03504   4
   1  14   0 9.65175 4.19228   1
  -1  14   0 19.1179 5.03239   1
   1  14   0 17.4761 4.25801   3
   2 -14   0 126.192 11.5342   2
  -2 -14   0 129.310 12.2322   5
   2 -14   0 142.944 12.2015   4
  -2 -14   0 136.848 13.1608   7
  -2 -14   0 130.438 12.1191   4
  -2 -14   0 121.583 11.6617   2
   2 -14   0 141.868 14.9124   7
   2  14   0 124.964 11.3402   3
  -2  14   0 116.413 11.4435   1
   2  14   0 109.672 12.7634   1
   3 -14   0 17.2386 4.59637   2
  -3 -14   0 17.5964 5.18210   2
   3 -14   0 13.0323 5.82598   7
  -3 -14   0 21.7988 5.24836   5
  -3 -14   0 17.1247 5.46201   7
  -3 -14   0 18.9169 5.41689   4
   3 -14   0 18.4825 4.85724   4
   3  14   0 28.5339 6.05183   1
   3  14   0 15.3062 4.90160   3
  -3  14   0 12.9785 4.74972   1
  -4 -14   0 13.3372 4.84584   7
  -4 -14   0 11.4297 4.47705   2
   4 -14   0 11.2918 3.85881   2
  -4 -14   0 12.3081 4.37426   4
  -4 -14   0 12.0950 4.66184   5
   4 -14   0 9.36989 4.18493   4
  -4  14   0 12.5260 5.05959   1
   4  14   0 15.1790 4.78624   3
  -5 -14   0 19.2224 4.93281   4
  -5 -14   0 17.3202 5.40066   7
   5 -14   0 16.6996 4.28407   2
  -5 -14   0 8.12048 4.38693   2
  -5 -14   0 12.3747 4.46007   5
   5  14   0 20.1839 5.68729   3
  -5  14   0 20.5409 5.27150   1
  -6 -14   0 19.9406 4.87492   4
  -6 -14   0 15.2822 4.54967   5
  -6 -14   0 11.0308 4.55531   2
  -6 -14   0 17.1363 4.79631   7
  -6  14   0 6.08155 4.55116   1
   6  14   0 14.2380 5.31854   3
   0 -15   0 1.15847 3.98701   7
   0 -15   0 0.14809 4.00033   2
   0 -15   0 6.65294 3.96085   4
   0  15   0 0.00831 3.31304   1
   1 -15   0 16.4860 5.23698   4
  -1 -15   0 15.4302 5.16477   2
  -1 -15   0 15.6096 5.60975   7
  -1 -15   0 9.42102 4.51730   5
   1 -15   0 17.9381 5.10823   2
  -1 -15   0 13.3928 5.06521   4
   1 -15   0 21.2074 5.92331   7
  -1  15   0 23.0475 5.43676   1
   1  15   0 20.7328 5.28885   1
  -2 -15   0 20.2543 5.11366   2
  -2 -15   0 17.2471 4.89105   5
   2 -15   0 13.8450 4.73543   2
   2 -15   0 8.70692 4.34568   4
  -2 -15   0 8.20477 4.97693   7
  -2 -15   0 23.9546 5.75623   4
   2 -15   0 23.6723 6.38544   7
   2  15   0 14.8184 4.57505   3
  -2  15   0 21.1323 5.18474   1
   2  15   0 17.7613 5.26551   1
  -3 -15   0 -2.5395 3.32822   4
  -3 -15   0 2.08185 4.08246   2
  -3 -15   0 10.6855 5.45346   7
  -3 -15   0 6.40872 4.30862   5
   3 -15   0 1.61538 3.90620   4
   3 -15   0 1.41564 3.34846   2
   3 -15   0 7.68807 5.05538   7
   3  15   0 4.23066 4.01418   1
   3  15   0 12.5931 4.79548   3
  -3  15   0 0.45664 3.72341   1
   4 -15   0 13.4219 4.16236   4
  -4 -15   0 15.8298 4.66451   5
  -4 -15   0 10.3069 4.73460   4
   4 -15   0 10.8178 4.10421   2
  -4 -15   0 7.22364 4.37647   2
  -4 -15   0 8.94319 4.78715   7
  -4  15   0 0.29050 3.70422   1
   4  15   0 11.9732 4.68320   3
   5 -15   0 5.79509 3.51060   2
  -5 -15   0 0.96060 4.12792   2
  -5 -15   0 6.98380 4.07407   7
  -5 -15   0 7.37833 4.20827   4
  -5 -15   0 4.81188 3.80946   5
   5  15   0 3.64807 4.18841   3
  -5  15   0 7.11181 4.41793   1
  -6 -15   0 4.13827 3.62350   5
  -6 -15   0 7.73245 4.12664   4
  -6 -15   0 4.10021 3.96053   2
  -6 -15   0 4.74271 4.27367   7
  -6  15   0 1.77301 3.94690   1
   6  15   0 1.99096 4.47483   3
   0 -16   0 0.17502 3.71146   4
   0 -16   0 13.2081 4.49012   2
   0 -16   0 13.2340 5.49370   7
   0  16   0 9.67524 4.22359   1
   1 -16   0 46.6087 8.34774   7
  -1 -16   0 45.3933 7.02668   2
  -1 -16   0 51.3876 7.97532   4
   1 -16   0 31.7708 6.55948   4
   1 -16   0 39.9281 6.64052   2
  -1 -16   0 39.6920 7.83196   7
   1  16   0 54.7377 7.80860   1
  -1  16   0 51.1732 7.53313   1
   2 -16   0 80.3820 10.7058   7
   2 -16   0 73.4474 8.66263   2
  -2 -16   0 65.1337 9.29533   4
  -2 -16   0 59.2170 9.33352   5
  -2 -16   0 78.1161 11.0125   7
  -2 -16   0 69.2708 9.03505   2
   2 -16   0 62.0150 8.93071   4
   2  16   0 104.572 10.9185   1
  -2  16   0 88.0091 9.64974   1
   3 -16   0 3.57997 4.44706   7
   3 -16   0 9.39297 4.02941   2
  -3 -16   0 2.07623 3.78991   2
   3 -16   0 2.48795 3.59176   4
  -3 -16   0 13.6594 5.33785   7
  -3 -16   0 8.17488 4.56973   4
  -3 -16   0 13.1649 4.66825   5
  -3  16   0 5.93145 4.44511   1
   3  16   0 9.04343 4.66478   1
   4 -16   0 35.4486 5.88356   2
   4 -16   0 32.8587 6.13506   4
  -4 -16   0 35.1568 7.41214   7
  -4 -16   0 32.4490 6.35515   2
  -4 -16   0 33.8006 6.63796   5
  -4 -16   0 35.6302 6.48971   4
  -4  16   0 45.2932 7.22550   1
   4  16   0 45.0868 7.01291   3
  -5 -16   0 15.7197 4.94787   4
  -5 -16   0 12.6154 4.66001   7
  -5 -16   0 6.86192 4.18122   2
  -5 -16   0 6.61224 3.84840   5
   5  16   0 8.81354 4.46834   3
  -5  16   0 4.29558 4.13941   1
   0 -17   0 1.25341 3.47706   2
   0 -17   0 2.91510 4.05893   4
   0 -17   0 0.56475 4.20594   7
   0  17   0 -0.2828 3.57223   1
  -1 -17   0 17.6215 5.43022   4
  -1 -17   0 6.46206 4.49904   2
   1 -17   0 16.9803 5.32116   2
  -1 -17   0 19.6111 6.00986   7
   1 -17   0 7.52793 5.26228   7
   1 -17   0 23.1535 6.10051   4
  -1  17   0 13.0440 4.73520   1
   1  17   0 21.2577 5.48109   1
  -2 -17   0 8.47311 5.18868   7
  -2 -17   0 10.4197 4.96376   4
   2 -17   0 6.29971 4.58763   4
   2 -17   0 19.3323 5.91564   7
  -2 -17   0 3.86928 4.11669   2
   2 -17   0 13.0070 4.56795   2
  -2  17   0 12.3434 5.02953   1
   2  17   0 13.4920 4.91151   1
   3 -17   0 3.00706 3.35838   2
   3 -17   0 -1.8985 4.23379   7
  -3 -17   0 -2.4812 3.39002   5
  -3 -17   0 12.1094 5.97569   7
   3 -17   0 3.83809 3.84494   4
  -3 -17   0 -0.9611 3.50987   2
  -3 -17   0 -1.4401 3.56806   4
  -3  17   0 1.13323 4.24450   1
   3  17   0 3.72840 4.02468   1
  -4 -17   0 12.6763 5.60345   7
  -4 -17   0 16.0861 5.14207   2
   4 -17   0 18.6144 4.66041   4
  -4 -17   0 9.10690 4.86446   4
   4 -17   0 9.69633 3.74421   2
  -4 -17   0 13.3838 4.74696   5
  -4  17   0 9.40561 4.35323   1
   0 -18   0 14.8612 4.96053   2
   0 -18   0 13.5278 4.97358   4
   0 -18   0 10.9614 5.79287   7
   0  18   0 27.5040 5.89349   1
   1 -18   0 7.32072 3.84367   2
  -1 -18   0 15.2404 5.72088   7
  -1 -18   0 12.3905 4.80443   4
   1 -18   0 18.2191 5.36817   4
   1 -18   0 5.39994 4.84164   7
  -1 -18   0 12.5912 4.60134   2
   1  18   0 16.6661 5.31805   1
  -1  18   0 14.3781 4.85295   1
  -2 -18   0 46.5546 7.43354   4
  -2 -18   0 37.2599 7.41672   7
   2 -18   0 34.0261 6.16391   4
   2 -18   0 32.7067 6.10221   2
  -2 -18   0 27.4727 6.05331   2
   2 -18   0 17.8453 6.60030   7
  -2  18   0 51.7417 7.14572   1
   2  18   0 43.1808 6.93005   1
   3 -18   0 6.76701 4.45845   4
   3 -18   0 22.9565 6.95019   7
   3 -18   0 2.90998 3.60239   2
  -3 -18   0 9.83742 4.86098   4
  -3 -18   0 7.17140 4.05250   5
  -3 -18   0 6.99165 4.40848   7
  -3 -18   0 1.04796 3.99141   2
  -3  18   0 5.19991 4.17907   1
   3  18   0 5.66894 4.50179   1
 -10   0   1 2.40012 3.55688   1
 -10   0   1 -3.1527 3.16424   6
  -9   0   1 -1.7723 3.23857   6
  -9   0   1 -3.9610 3.14735   1
  -9   0   1 2.34264 3.13041   2
  -8   0   1 14.4662 4.24030   2
  -8   0   1 21.5187 5.13659   6
   8   0  -1 12.2710 4.70733   3
  -8   0   1 17.2899 4.94693   1
  -7   0   1 15.5992 4.61820   1
  -7   0   1 19.7925 4.28877   2
  -7   0   1 12.6116 4.37290   6
   7   0  -1 10.5026 4.71171   3
  -6   0   1 40.2853 5.75963   2
   6   0  -1 36.0821 6.08850   3
  -6   0   1 24.1723 5.47921   1
  -6   0   1 36.4142 5.72152   6
  -5   0   1 2.43581 2.81679   6
  -5   0   1 2.02170 3.02219   1
   5   0  -1 -0.7070 3.07707   3
  -5   0   1 3.20504 2.61839   2
  -4   0   1 561.529 38.7900   1
  -4   0   1 555.237 36.3596   5
   4   0  -1 548.521 38.4785   3
  -4   0   1 600.163 38.5234   6
  -4   0   1 547.416 37.9008   2
   4   0  -1 558.369 36.3084   7
  -3   0   1 8.24834 1.19852   5
  -3   0   1 3.78967 2.64205   6
   3   0  -1 9.01402 3.36022   3
  -3   0   1 6.30062 3.26940   1
  -3   0   1 13.3879 2.99126   2
   3   0  -1 9.47565 1.39677   7
  -2   0   1 2.14425 2.65747   3
   2   0  -1 0.78226 2.69311   3
   2   0  -1 0.98704 1.14124   7
  -2   0   1 0.37961 2.36413   6
  -2   0   1 0.80573 0.78031   7
  -2   0   1 1.86685 0.83545   5
  -2   0   1 0.28278 1.66821   2
   1   0  -1 0.08413 0.94409   3
  -1   0   1 1.62924 0.65721   5
   1   0  -1 0.30164 0.62063   5
   1   0  -1 0.89558 0.77621   7
  -1   0   1 -0.6397 1.23426   3
  -1   0   1 1.02829 1.28315   6
  -1   0   1 1.76943 1.03112   2
  -1   0   1 0.45604 0.80345   7
   1   0  -1 -0.8098 1.22881   6
  -1   0  -1 27.2772 3.06371   3
  -1   0  -1 30.0429 2.24306   5
   2   0   1 9555.97 617.952   3
  -2   0  -1 9642.11 617.871   3
  -3   0  -1 99.7294 8.65225   1
   3   0   1 100.993 8.85554   3
   4   0   1 150.466 12.7420   3
  -4   0  -1 158.514 12.7084   1
  -4   0  -1 161.155 12.4478   6
  -5   0  -1 10.3702 3.74743   1
  -5   0  -1 7.50870 3.25245   6
   5   0   1 10.7059 3.94855   3
  -5   0  -1 9.09829 3.56402   2
  -6   0  -1 72.9882 8.70947   6
  -6   0  -1 75.7671 8.97184   2
  -6   0  -1 91.2260 8.77187   1
   6   0   1 96.4168 10.3817   3
   7   0   1 1.10705 3.79273   3
  -7   0  -1 -1.7759 2.89429   1
  -7   0  -1 2.30096 2.86263   6
  -7   0  -1 2.30777 3.16410   2
  -8   0  -1 34.9782 6.27937   6
  -8   0  -1 39.7374 6.84166   1
  -8   0  -1 39.4907 6.10755   2
   8   0   1 38.8930 7.20408   3
  -9   0  -1 1.32090 3.12829   2
   9   0   1 1.58425 3.93823   3
  -9   0  -1 1.67455 3.57863   1
  -9   0  -1 1.97323 3.48065   6
 -10  -1   1 13.8467 4.79007   1
 -10  -1   1 20.6228 5.32329   6
 -10   1   1 13.9431 4.55916   1
  -9  -1   1 3.47432 3.47486   6
  -9  -1   1 8.10325 4.34905   1
  -9  -1   1 5.53509 3.37341   2
  -9   1   1 3.95316 3.76670   1
   9   1  -1 -0.7743 4.40694   3
  -9   1   1 5.15908 3.75497   6
  -8  -1   1 140.242 13.0524   6
  -8  -1   1 163.045 13.9304   1
  -8  -1   1 167.734 13.1716   2
  -8   1   1 157.473 12.7906   2
  -8   1   1 145.904 12.8198   6
   8   1  -1 132.307 13.6609   3
  -8   1   1 154.043 13.8708   1
  -7  -1   1 14.3452 4.11185   2
  -7  -1   1 13.3332 4.11480   6
   7  -1  -1 10.0463 4.45604   3
  -7  -1   1 9.35177 4.78038   1
  -7   1   1 16.7601 4.32404   6
  -7   1   1 11.1222 4.34213   1
  -7   1   1 12.7625 3.59512   2
   7   1  -1 11.3915 4.67527   3
  -6  -1   1 36.1872 5.72904   6
  -6  -1   1 36.4355 5.44724   2
   6  -1  -1 38.8596 6.29848   3
  -6  -1   1 27.0200 5.84094   1
  -6   1   1 29.5415 4.85007   2
  -6   1   1 33.0398 5.40925   6
   6   1  -1 28.2454 6.20893   3
  -6   1   1 28.2910 2.35388   4
  -6   1   1 13.9276 4.66675   1
  -5  -1   1 8.15362 3.65239   6
  -5  -1   1 5.21504 2.83047   2
  -5  -1   1 3.31740 3.25278   1
  -5  -1   1 6.85550 0.90044   5
   5  -1  -1 4.73167 1.20917   7
   5  -1  -1 7.40953 3.52599   3
   5   1  -1 7.99210 3.87676   3
  -5   1   1 2.20999 3.18912   1
  -5   1   1 8.72115 3.61853   6
  -5   1   1 9.25204 2.96736   2
  -4  -1   1 39.5033 3.07938   5
   4  -1  -1 47.9758 6.14204   3
  -4  -1   1 50.6119 6.32638   6
  -4  -1   1 40.1421 5.32901   2
   4  -1  -1 48.0141 3.51788   7
  -4   1   1 23.2340 5.02644   1
   4   1  -1 17.7765 5.06050   3
  -4   1   1 27.3007 4.79214   6
  -3  -1   1 54.3859 5.64443   2
   3  -1  -1 53.6548 6.09123   3
  -3  -1   1 57.5182 6.46603   6
   3  -1  -1 49.3176 4.17155   7
   3  -1  -1 48.3787 4.21390   7
  -3  -1   1 49.3749 3.86094   5
   3   1  -1 46.6189 3.92725   7
  -3   1   1 63.6208 6.95650   1
  -3   1   1 43.7831 5.34038   6
   3   1  -1 54.1663 6.74870   3
  -3   1   1 48.5536 3.74603   7
  -3   1   1 50.3948 4.06575   5
  -2  -1   1 509.241 33.6741   3
   2  -1  -1 483.064 32.5139   5
   2  -1  -1 472.927 32.6735   7
  -2  -1   1 503.384 32.4747   7
   2  -1  -1 496.868 32.5012   5
  -2  -1   1 522.818 32.5908   7
   2  -1  -1 491.705 33.3411   3
   2  -1  -1 497.099 33.2432   6
   2  -1  -1 525.067 33.7976   1
  -2  -1   1 509.410 33.2796   2
  -2  -1   1 522.254 32.5099   5
  -2   1   1 492.746 32.3138   4
   2   1  -1 496.004 32.6053   7
   2   1  -1 507.894 32.3840   5
  -2   1   1 484.072 32.3139   4
  -2   1   1 492.826 33.2388   6
  -2   1   1 482.333 33.6003   1
  -2   1   1 488.262 32.5994   5
  -2   1   1 497.599 33.3025   3
   2   1  -1 509.610 33.7543   3
  -2   1   1 487.501 32.5907   7
   2   1  -1 503.469 33.2934   2
   1  -1  -1 71.7272 5.11168   5
   1  -1  -1 69.1965 4.86479   4
   1  -1  -1 72.2330 5.26372   6
  -1  -1   1 61.1878 5.15095   2
  -1  -1   1 64.4034 5.50558   3
   1  -1  -1 69.5947 5.62974   1
   1  -1  -1 64.4142 5.16027   7
  -1  -1   1 69.2425 5.21774   7
  -1  -1   1 63.4609 4.96904   5
  -1  -1   1 63.4438 4.88408   4
  -1   1   1 73.7295 5.13278   5
  -1   1   1 62.7275 5.16468   7
   1   1  -1 67.5943 5.57490   3
  -1   1   1 74.8784 4.92259   2
   1   1  -1 67.5632 5.25247   2
  -1   1   1 66.6533 4.98738   4
   1   1  -1 68.5820 4.97222   5
  -1   1   1 74.5095 5.18827   6
  -1   1   1 72.9190 5.62224   1
   1   1  -1 69.2903 5.17214   7
   1  -1   1 30.0180 2.98867   1
  -1  -1  -1 25.1551 2.57784   7
  -1  -1  -1 26.5264 2.42089   5
  -1  -1  -1 22.5584 2.56562   7
  -1  -1  -1 20.9890 3.03911   2
   1  -1   1 21.4107 2.37400   5
  -1  -1  -1 27.4130 3.29208   3
   1  -1   1 24.3182 2.32103   4
   1   1   1 26.7899 2.38563   5
   1   1   1 23.8990 3.15779   2
   1   1   1 36.2147 3.75592   3
  -1   1  -1 29.2475 2.39979   4
  -1   1  -1 22.6782 2.26938   4
  -1   1  -1 27.0469 2.35386   6
  -1   1  -1 30.0029 2.57035   3
  -1   1  -1 28.1896 2.72529   7
  -1   1  -1 27.6908 2.52282   5
  -1   1  -1 28.5674 2.79327   1
  -2  -1  -1 2303.59 141.701   5
   2  -1   1 2155.37 141.757   7
  -2  -1  -1 2232.86 141.612   7
  -2  -1  -1 2166.99 141.594   7
   2  -1   1 2120.74 142.428   3
   2  -1   1 2176.47 141.655   5
   2  -1   1 2234.16 142.719   1
   2  -1   1 2214.94 141.668   5
  -2  -1  -1 2242.72 142.858   2
   2   1   1 2168.30 142.832   3
  -2   1  -1 2205.43 141.778   7
  -2   1  -1 2197.98 141.772   5
   2   1   1 2219.15 141.823   7
  -2   1  -1 2214.73 142.624   1
  -2   1  -1 2222.92 142.314   6
  -2   1  -1 2110.47 142.358   3
  -3  -1  -1 63.4368 6.43131   2
   3  -1   1 49.2150 3.87968   7
   3  -1   1 47.3011 3.91885   7
  -3  -1  -1 42.4958 3.50755   5
   3  -1   1 58.0626 6.13555   3
  -3   1  -1 54.2981 5.00839   6
   3   1   1 44.7592 3.51324   7
  -3   1  -1 41.1324 5.48279   1
   3   1   1 54.9369 6.46297   3
  -3   1  -1 51.0372 3.76888   5
  -4  -1  -1 427.035 30.1622   2
   4  -1   1 396.053 28.1161   7
   4  -1   1 404.048 30.0196   3
   4   1   1 455.817 30.4903   3
  -4   1  -1 470.738 29.8479   6
  -4   1  -1 463.012 30.3190   1
  -5  -1  -1 21.6788 4.49367   2
  -5  -1  -1 28.3040 4.90146   6
   5  -1   1 21.0313 4.96273   3
  -5  -1  -1 24.2934 4.76302   1
  -5   1  -1 15.8295 4.02866   1
  -5   1  -1 25.5399 4.64277   6
   5   1   1 25.5542 5.34119   3
   6  -1   1 10.1251 4.26925   3
  -6  -1  -1 9.46770 3.63895   6
  -6  -1  -1 5.30034 3.48062   1
  -6  -1  -1 10.7598 3.91665   2
   6   1   1 6.06562 3.84604   3
  -6   1  -1 19.0696 4.50889   2
  -6   1  -1 13.9889 4.18227   1
  -6   1  -1 11.0356 3.46142   6
  -7  -1  -1 19.9417 5.16723   1
  -7  -1  -1 30.4756 5.67192   6
  -7  -1  -1 32.3099 5.45409   2
   7  -1   1 25.8101 5.47076   3
   7   1   1 21.6374 5.78685   3
  -7   1  -1 24.9195 4.92686   6
  -7   1  -1 22.4050 5.09802   1
  -7   1  -1 29.6441 5.33012   2
  -8  -1  -1 108.621 11.2559   1
  -8  -1  -1 114.831 9.95175   2
  -8  -1  -1 98.6529 9.60466   6
   8  -1   1 110.353 11.3560   3
  -8   1  -1 91.4014 9.96192   2
  -8   1  -1 87.3394 10.0527   6
  -8   1  -1 102.523 11.3647   1
   8   1   1 76.9097 10.3268   3
  -9  -1  -1 0.03273 3.01449   1
  -9  -1  -1 -0.4139 2.93485   6
   9  -1   1 3.04416 4.11471   3
  -9  -1  -1 1.84052 3.49412   2
   9   1   1 1.30733 4.47810   3
  -9   1  -1 -2.7436 2.60702   2
  -9   1  -1 3.28816 3.43666   1
  -9   1  -1 -0.0171 3.19331   6
  -9  -2   1 3.08658 3.08354   2
  -9  -2   1 7.74805 3.90847   6
  -9  -2   1 5.93910 4.24422   1
  -9   2   1 5.00016 3.50214   6
   9   2  -1 6.03985 4.59089   3
  -9   2   1 3.91715 3.90115   1
  -8  -2   1 11.7500 3.89342   2
  -8  -2   1 12.3344 4.75195   1
  -8  -2   1 4.20551 3.81024   6
  -8   2   1 5.77380 3.29054   6
  -8   2   1 3.86872 4.02544   1
   8   2  -1 5.54055 4.24593   3
  -8   2   1 7.40188 3.35588   2
  -7  -2   1 11.1300 4.44237   1
  -7  -2   1 15.8009 3.98660   2
  -7  -2   1 18.5823 5.11460   6
  -7   2   1 9.59115 4.21676   1
  -7   2   1 11.5002 3.58547   2
  -7   2   1 18.3407 4.68028   6
   7   2  -1 16.1280 5.24728   3
   6  -2  -1 95.6293 9.23500   3
  -6  -2   1 97.4141 10.2311   6
  -6  -2   1 80.8546 9.14408   2
  -6  -2   1 77.8382 6.01491   5
  -6   2   1 102.926 9.54002   1
  -6   2   1 97.9272 6.57816   4
   6   2  -1 100.376 10.6934   3
  -6   2   1 108.913 9.04249   6
  -5  -2   1 67.4329 4.70191   5
   5  -2  -1 59.3512 5.05631   7
  -5  -2   1 65.8785 7.33698   2
  -5  -2   1 73.6847 8.25319   6
   5  -2  -1 74.2942 7.83219   3
   5   2  -1 62.3858 8.14409   3
  -5   2   1 59.4945 4.75140   4
  -5   2   1 69.2131 7.61901   6
  -5   2   1 57.9114 7.63144   1
  -5   2   1 52.1023 4.68077   4
  -4  -2   1 333.935 22.3442   7
   4  -2  -1 328.730 23.3721   7
  -4  -2   1 317.886 22.3367   7
  -4  -2   1 324.865 24.1877   2
  -4  -2   1 322.786 22.7439   5
   4  -2  -1 302.662 24.0457   3
  -4   2   1 370.283 23.0077   5
  -4   2   1 372.992 24.2609   6
  -4   2   1 360.411 22.7439   4
  -4   2   1 363.123 22.6914   4
   4   2  -1 374.247 25.2129   3
  -4   2   1 369.137 24.8787   1
   3  -2  -1 43.6213 3.83939   5
  -3  -2   1 47.8455 3.93429   7
  -3  -2   1 46.2814 3.96742   5
  -3  -2   1 39.3218 5.16494   2
  -3  -2   1 41.5437 3.74956   7
   3  -2  -1 51.2849 5.50687   3
  -3   2   1 42.9327 5.62622   1
  -3   2   1 38.2580 3.62815   4
   3   2  -1 36.5318 5.94520   3
  -3   2   1 37.7976 3.88978   7
  -3   2   1 39.7872 3.69464   4
  -3   2   1 39.8958 4.67626   6
  -3   2   1 40.0172 4.16964   5
   2  -2  -1 716.720 47.6661   7
   2  -2  -1 731.945 47.6386   7
   2  -2  -1 720.307 47.6796   6
  -2  -2   1 724.374 47.3877   5
  -2  -2   1 714.692 47.8875   2
  -2  -2   1 715.255 47.4915   7
   2  -2  -1 730.099 47.0306   4
  -2  -2   1 734.006 47.4339   7
   2  -2  -1 720.253 47.4178   5
   2  -2  -1 722.040 47.0321   4
  -2   2   1 741.858 47.5415   2
  -2   2   1 697.835 47.3256   4
  -2   2   1 726.223 48.2234   1
  -2   2   1 697.935 47.4851   5
  -2   2   1 715.243 47.6709   3
  -2   2   1 720.465 47.5988   6
   2   2  -1 748.058 48.4553   3
  -2   2   1 718.341 47.3434   4
  -2   2   1 738.159 47.6014   7
   2   2  -1 758.863 47.6259   7
   2   2  -1 734.823 48.0755   2
   1  -2  -1 37.2810 3.65993   4
  -1  -2   1 31.8747 3.63335   5
   1  -2  -1 28.3427 3.48070   4
   1  -2  -1 41.9389 3.48269   6
   1  -2  -1 37.9132 3.88139   5
  -1  -2   1 39.9565 3.88851   1
   1  -2  -1 45.3324 3.55564   2
  -1  -2   1 34.1560 3.75846   7
   1  -2  -1 43.0622 4.11005   1
  -1  -2   1 35.4263 4.18298   3
   1  -2  -1 40.6230 4.20869   7
  -1  -2   1 42.3773 3.98131   2
   1  -2  -1 40.1862 4.28621   7
  -1  -2   1 35.1430 3.82517   4
  -1  -2   1 34.5871 3.94348   7
   1   2  -1 48.2507 4.06426   2
  -1   2   1 35.9699 4.03465   7
  -1   2   1 43.2306 4.33438   7
  -1   2   1 33.0157 3.30212   2
   1   2  -1 32.6182 4.02980   3
  -1   2   1 44.1980 3.42468   6
  -1   2   1 34.7242 3.86935   5
  -1   2   1 41.3407 3.98958   1
  -1   2   1 41.1016 3.90339   4
   1   2  -1 39.1480 4.09297   7
   1   2  -1 41.8902 3.87721   5
   0  -2   1 723.926 46.9498   2
   0  -2   1 736.467 47.0968   4
   0  -2  -1 721.419 46.6704   3
   0  -2  -1 718.083 47.2185   7
   0  -2   1 703.684 47.1688   7
   0  -2  -1 684.974 46.8829   1
   0  -2   1 695.098 46.6092   3
   0  -2   1 692.150 46.8679   1
   0  -2  -1 713.533 47.2823   7
   0  -2  -1 767.040 47.2052   5
   0  -2   1 674.310 47.2406   7
   0  -2  -1 688.985 46.8337   6
   0  -2  -1 728.170 47.0075   4
   0   2  -1 756.658 47.1525   5
   0   2   1 724.719 47.2806   7
   0   2  -1 712.585 46.9131   2
   0   2   1 709.887 46.9687   4
   0   2  -1 736.690 47.3323   7
   0   2   1 715.790 46.8405   6
   0   2  -1 703.751 46.6215   3
   0   2   1 730.195 46.9188   1
   0   2   1 774.371 46.9650   2
   0   2  -1 731.021 47.0670   4
   0   2  -1 738.917 46.9063   1
   0   2   1 725.890 46.6964   3
   1  -2   1 79.2178 6.04586   3
   1  -2   1 88.6160 6.68079   1
  -1  -2  -1 92.3237 7.00172   3
   1  -2   1 90.4187 6.07273   6
   1  -2   1 79.9078 6.80577   7
  -1  -2  -1 78.7792 6.66131   5
  -1  -2  -1 75.4985 6.70947   7
   1  -2   1 87.4361 6.85136   2
   1  -2   1 96.4856 7.05963   7
   1  -2   1 88.7245 6.50295   4
  -1  -2  -1 92.1836 6.71746   1
  -1  -2  -1 85.5282 7.03153   2
   1  -2   1 84.8717 6.55197   4
  -1  -2  -1 84.0740 6.87413   7
   1   2   1 95.2632 6.85680   1
   1   2   1 96.9035 7.37960   3
  -1   2  -1 101.255 6.82461   2
  -1   2  -1 102.489 6.78177   1
  -1   2  -1 89.6665 5.98065   6
   1   2   1 88.1386 6.97022   7
  -1   2  -1 85.3418 6.80007   5
   1   2   1 79.6145 7.00200   2
  -1   2  -1 83.7987 6.74333   4
  -1   2  -1 84.9772 6.86674   7
   1   2   1 87.1450 6.79869   7
  -1   2  -1 81.4178 6.06162   3
  -1   2  -1 83.0703 6.49574   4
  -2   2  -1 174.626 12.1991   7
   2   2   1 185.175 13.1651   3
  -2   2  -1 167.858 12.0558   5
  -2   2  -1 173.392 12.0214   6
  -2   2  -1 177.085 11.8300   4
  -2   2  -1 175.802 12.6473   1
  -2   2  -1 163.124 12.0939   3
  -2   2  -1 172.483 11.8207   4
   2   2   1 164.459 12.0120   7
  -2   2  -1 164.661 12.4481   2
  -3  -2  -1 93.1873 7.21848   7
  -3  -2  -1 91.3226 8.73237   2
   3  -2   1 99.2747 8.53633   3
  -3  -2  -1 88.4944 7.29899   5
  -3  -2  -1 93.8241 7.22789   7
  -3   2  -1 103.736 7.21527   4
  -3   2  -1 101.595 7.58039   5
  -3   2  -1 108.407 8.14520   6
   3   2   1 123.029 9.55894   3
  -3   2  -1 105.445 7.19887   4
  -3   2  -1 108.360 8.70164   1
   3   2   1 120.661 8.82430   7
   4  -2   1 194.590 13.6112   7
  -4  -2  -1 170.059 14.7629   2
  -4  -2  -1 190.702 13.2357   5
  -4  -2  -1 186.371 13.1811   5
   4  -2   1 186.250 14.8234   3
   4   2   1 202.406 15.6148   3
  -4   2  -1 199.247 13.1398   4
  -4   2  -1 218.185 14.5954   6
  -4   2  -1 199.637 15.1989   1
  -4   2  -1 208.211 13.1891   4
   5  -2   1 13.0552 4.02943   3
   5  -2   1 12.7920 2.01449   7
  -5  -2  -1 11.2855 3.82322   2
  -5  -2  -1 13.1676 1.54188   5
  -5  -2  -1 12.7737 1.60725   5
  -5   2  -1 8.38209 2.96234   6
  -5   2  -1 14.1333 4.02204   1
   5   2   1 13.4462 4.52446   3
  -5   2  -1 12.6684 1.69472   4
  -5   2  -1 11.6571 1.65617   4
  -6  -2  -1 34.2807 5.90749   6
  -6  -2  -1 36.0473 5.84037   2
   6  -2   1 47.0239 6.45274   3
  -6   2  -1 31.2920 3.09628   4
  -6   2  -1 25.4816 4.82444   6
  -6   2  -1 25.9398 5.49919   1
   6   2   1 37.8429 6.67278   3
  -7  -2  -1 12.6342 4.35119   2
  -7  -2  -1 13.6968 4.41533   6
   7  -2   1 16.5858 4.54350   3
  -7  -2  -1 11.3958 4.40735   1
  -7   2  -1 13.2924 4.41227   1
  -7   2  -1 8.68980 3.66130   6
  -7   2  -1 12.1388 3.76338   2
   7   2   1 13.7372 5.00372   3
  -8  -2  -1 25.7330 5.96161   6
   8  -2   1 28.5389 5.63628   3
  -8  -2  -1 23.5228 5.05364   2
  -8  -2  -1 37.2043 6.53385   1
  -8   2  -1 24.7255 5.48321   2
   8   2   1 33.7200 6.90505   3
  -8   2  -1 33.5274 6.17770   1
  -8   2  -1 32.7983 5.51200   6
  -9  -2  -1 5.84229 3.82958   6
  -9  -2  -1 2.88953 3.49553   2
  -9  -2  -1 5.41937 3.49905   1
   9   2   1 5.09984 4.36771   3
  -9   2  -1 1.10196 3.03460   2
  -9   2  -1 0.24999 3.33798   1
  -9  -3   1 0.67738 2.92035   2
  -9  -3   1 4.91064 4.50239   6
  -9  -3   1 -0.1050 3.99866   1
  -9   3   1 12.2308 4.42052   1
   9   3  -1 0.46457 4.05404   3
  -8  -3   1 68.4407 8.27573   2
  -8  -3   1 76.3693 9.57640   1
  -8  -3   1 67.6411 9.12627   6
  -8   3   1 68.6152 8.72854   1
  -8   3   1 63.4078 7.82368   2
   8   3  -1 66.9293 9.19159   3
  -8   3   1 66.3220 7.70168   6
  -7  -3   1 8.29424 4.48937   6
  -7  -3   1 2.92802 3.36886   2
  -7   3   1 4.24567 3.20242   6
   7   3  -1 2.04777 4.24790   3
  -7   3   1 7.24594 4.04064   1
  -6  -3   1 254.223 17.1300   5
  -6  -3   1 261.551 19.9479   6
  -6  -3   1 256.118 19.1960   2
  -6  -3   1 251.874 17.1227   5
  -6   3   1 257.967 17.4723   4
  -6   3   1 263.126 19.7278   1
  -6   3   1 261.288 18.8311   6
   6   3  -1 235.070 19.8904   3
  -5  -3   1 -0.4763 2.40764   2
  -5  -3   1 1.11173 1.32397   5
  -5   3   1 1.62622 1.47194   4
  -5   3   1 4.33768 2.73030   6
  -5   3   1 5.16809 2.98165   1
   5   3  -1 -0.5084 3.35787   3
  -4  -3   1 288.675 19.5252   7
  -4  -3   1 280.788 19.5847   7
  -4  -3   1 261.098 20.7961   2
  -4  -3   1 272.629 19.5846   5
  -4   3   1 284.992 20.3510   6
   4   3  -1 308.559 21.8047   3
  -4   3   1 297.195 19.9115   5
  -4   3   1 297.228 19.6650   4
  -4   3   1 306.223 21.3823   1
  -4   3   1 299.070 19.6666   4
   3  -3  -1 79.9771 6.78601   5
  -3  -3   1 93.6092 6.93567   7
  -3  -3   1 89.0914 7.16195   7
   3  -3  -1 86.3984 5.68596   4
  -3  -3   1 78.2828 6.76822   5
   3  -3  -1 89.8917 7.41180   7
  -3  -3   1 94.9173 7.90400   2
  -3   3   1 85.9105 7.04394   5
  -3   3   1 76.5047 6.78195   4
  -3   3   1 83.9387 7.91940   1
  -3   3   1 80.5937 7.08091   7
  -3   3   1 83.2935 6.87161   4
   3   3  -1 74.5856 8.68056   3
  -3   3   1 84.0148 7.11631   6
  -2  -3   1 1141.78 75.0611   7
  -2  -3   1 1118.18 75.3122   2
   2  -3  -1 1108.23 74.8451   2
  -2  -3   1 1143.93 75.2318   7
   2  -3  -1 1136.36 74.9934   5
   2  -3  -1 1124.73 74.8430   6
   2  -3  -1 1150.62 74.7661   4
  -2  -3   1 1162.37 75.0000   5
   2  -3  -1 1100.60 75.2727   7
   2  -3  -1 1163.01 74.8140   4
   2   3  -1 1161.45 75.7424   3
  -2   3   1 1195.23 75.0801   4
  -2   3   1 1158.31 74.9850   4
  -2   3   1 1133.26 74.7229   3
  -2   3   1 1221.48 74.8892   2
  -2   3   1 1124.03 75.1319   5
  -2   3   1 1141.22 75.2017   7
  -2   3   1 1200.59 74.8300   6
  -2   3   1 1146.97 75.4571   1
   1  -3  -1 29.4753 3.98438   7
   1  -3  -1 20.0277 3.53575   5
   1  -3  -1 33.7285 3.51249   2
  -1  -3   1 29.0795 4.06008   7
   1  -3  -1 30.9987 3.76383   4
  -1  -3   1 24.8882 3.59691   4
   1  -3  -1 39.3315 3.40786   6
  -1  -3   1 26.5725 3.84360   7
  -1  -3   1 32.6977 3.87318   5
   1  -3  -1 25.8250 4.12815   7
   1  -3  -1 30.0405 3.86424   4
  -1  -3   1 29.8287 3.98658   3
  -1  -3   1 28.4185 3.96439   1
   1  -3  -1 32.7016 4.08258   1
  -1  -3   1 31.6023 4.12144   2
   1   3  -1 30.4120 3.99345   2
  -1   3   1 23.0744 3.76523   5
   1   3  -1 34.9127 4.52407   3
   1   3  -1 29.1810 3.96259   1
  -1   3   1 30.5296 4.12318   7
   1   3  -1 23.7807 3.60819   5
  -1   3   1 28.0247 3.85454   1
  -1   3   1 36.6324 3.22545   6
   1   3  -1 29.0212 3.97996   7
  -1   3   1 22.3340 3.12329   2
  -1   3   1 37.4471 4.70128   7
   1   3  -1 34.5247 4.38047   7
  -1   3   1 32.9942 3.91974   4
   0  -3   1 425.769 28.8066   7
   0  -3   1 434.711 28.6229   7
   0  -3  -1 445.270 28.7247   7
   0  -3   1 405.415 28.2187   2
   0  -3   1 430.960 27.9695   6
   0  -3   1 433.562 27.7705   3
   0  -3  -1 418.817 28.1850   2
   0  -3   1 421.704 28.4853   5
   0  -3  -1 408.906 28.3309   4
   0  -3   1 395.743 28.1376   1
   0  -3  -1 414.416 28.4964   5
   0  -3  -1 425.424 27.7975   3
   0  -3  -1 427.881 28.0653   6
   0  -3  -1 456.547 28.3113   1
   0  -3  -1 436.061 28.8535   7
   0  -3   1 410.206 28.4148   4
   0   3   1 386.588 28.1457   1
   0   3  -1 440.535 27.8016   3
   0   3   1 422.781 27.8966   3
   0   3  -1 412.047 28.2039   2
   0   3  -1 448.842 28.8452   7
   0   3  -1 385.461 28.1586   1
   0   3   1 434.757 28.3226   4
   0   3  -1 456.356 28.6790   5
   0   3   1 436.392 28.1638   6
   0   3  -1 414.661 28.4070   4
   0   3   1 412.748 28.6471   7
   0   3   1 411.225 28.4520   5
   0   3   1 412.517 28.7791   7
   0   3  -1 424.727 28.5981   7
   0   3   1 449.590 28.2598   2
  -1  -3  -1 25.5593 3.96136   3
   1  -3   1 30.9162 3.85146   4
  -1  -3  -1 26.9919 4.06979   7
   1  -3   1 37.8844 4.11951   2
  -1  -3  -1 31.4703 4.08907   5
  -1  -3  -1 32.8639 3.95112   1
   1  -3   1 32.3328 4.34243   7
   1  -3   1 37.9497 2.96549   6
   1  -3   1 30.9008 3.88332   4
   1  -3   1 27.5968 4.00410   7
  -1  -3  -1 30.6461 4.16079   2
   1  -3   1 34.8080 4.00596   1
  -1  -3  -1 33.5898 4.15239   7
   1   3   1 37.2729 4.57685   3
  -1   3  -1 26.1488 3.89502   7
   1   3   1 31.4431 4.27742   2
  -1   3  -1 25.9647 3.67639   2
  -1   3  -1 37.5862 2.99007   6
   1   3   1 31.6637 4.24078   7
   1   3   1 29.1333 4.03762   1
   1   3   1 33.1309 4.46048   7
  -1   3  -1 25.3659 3.82997   5
  -1   3  -1 38.4182 4.15880   1
  -1   3  -1 27.2006 3.83121   4
  -1   3  -1 25.0415 4.46865   7
   2  -3   1 640.194 45.0630   6
  -2  -3  -1 650.419 45.3554   5
   2  -3   1 650.485 45.7011   2
  -2  -3  -1 674.338 45.6258   7
   2  -3   1 682.763 45.1738   4
   2  -3   1 670.730 45.1359   3
  -2  -3  -1 678.127 46.0989   2
   2  -3   1 664.043 45.8010   7
   2  -3   1 662.673 45.4701   5
   2  -3   1 634.071 45.1288   4
  -2  -3  -1 703.163 45.6337   7
  -2   3  -1 722.991 45.0134   6
  -2   3  -1 732.475 45.4785   4
  -2   3  -1 678.760 45.6932   1
  -2   3  -1 706.706 45.3440   4
   2   3   1 731.492 46.3625   3
   2   3   1 706.663 45.5338   7
  -2   3  -1 813.859 45.7360   5
  -2   3  -1 710.162 45.7797   7
  -2   3  -1 692.904 45.0411   3
  -3  -3  -1 17.4011 2.82662   7
   3  -3   1 16.5291 3.01743   6
   3  -3   1 18.3205 2.76334   5
   3  -3   1 17.8221 3.31772   3
  -3  -3  -1 18.3799 2.80015   7
  -3  -3  -1 17.9007 2.69393   5
  -3  -3  -1 17.3879 2.73828   5
   3  -3   1 17.3902 3.23495   7
  -3  -3  -1 17.6198 4.10128   2
  -3   3  -1 15.1979 2.70015   4
   3   3   1 22.7974 4.70439   3
  -3   3  -1 17.6618 2.87279   4
  -3   3  -1 15.3164 2.94815   7
  -3   3  -1 18.9664 2.94210   6
  -3   3  -1 20.1007 3.56639   1
  -3   3  -1 15.3692 2.75800   5
  -3   3  -1 16.5637 3.11263   3
  -4  -3  -1 328.536 23.4285   5
  -4  -3  -1 358.679 23.5673   5
  -4  -3  -1 353.577 23.3660   7
  -4  -3  -1 351.048 23.3607   7
   4  -3   1 342.442 24.6067   3
  -4  -3  -1 379.256 25.3551   2
  -4   3  -1 368.219 25.0759   1
  -4   3  -1 343.620 23.4934   4
  -4   3  -1 350.339 23.5617   4
   4   3   1 335.841 25.5751   3
  -4   3  -1 355.897 24.1854   6
  -5  -3  -1 15.0729 4.30113   2
  -5  -3  -1 15.5042 2.32385   5
  -5  -3  -1 18.6930 2.49302   5
   5  -3   1 21.6089 4.22395   3
   5  -3   1 22.3021 3.15198   7
  -5   3  -1 24.2260 3.98807   6
   5   3   1 25.9640 5.44843   3
  -5   3  -1 24.7872 2.89527   4
  -5   3  -1 24.1527 4.38105   1
  -5   3  -1 20.7010 2.76511   4
   6  -3   1 128.129 11.0886   3
  -6  -3  -1 120.627 8.61932   5
  -6  -3  -1 118.729 8.55622   5
  -6  -3  -1 130.138 11.2154   2
  -6   3  -1 127.984 9.07017   4
   6   3   1 119.058 11.7213   3
  -6   3  -1 130.012 11.2673   1
  -6   3  -1 127.148 10.3560   6
  -7  -3  -1 3.39101 3.25513   2
   7  -3   1 5.89734 3.58446   3
  -7  -3  -1 9.20860 4.05941   6
  -7   3  -1 3.33003 2.87443   1
  -7   3  -1 2.99436 2.82485   6
   7   3   1 1.34313 4.27496   3
  -8  -3  -1 21.5566 5.22116   2
  -8  -3  -1 20.5142 5.42422   1
  -8  -3  -1 14.0941 4.96878   6
   8   3   1 24.0593 5.86204   3
  -8   3  -1 13.3159 4.04988   2
  -8   3  -1 19.5178 4.39120   6
  -8   3  -1 8.65391 3.86593   1
  -9  -3  -1 2.39844 3.70777   2
  -9  -3  -1 -2.1359 2.88308   1
  -9  -3  -1 2.91588 3.47914   6
  -9   3  -1 -0.5815 2.95349   1
   9   3   1 1.38642 4.32741   3
  -9  -4   1 -4.1396 3.36282   6
  -9  -4   1 3.46966 3.60069   1
  -9  -4   1 -3.5915 2.58202   2
  -9   4   1 -3.2275 2.77287   1
   9   4  -1 2.40133 4.22499   3
  -8  -4   1 22.6357 5.47127   6
  -8  -4   1 18.3242 4.35945   2
  -8   4   1 19.5533 4.63515   2
   8   4  -1 19.0085 5.45051   3
  -8   4   1 28.9981 4.62102   6
  -8   4   1 15.3810 4.56284   1
  -7  -4   1 8.66362 1.66365   5
  -7  -4   1 8.54957 1.70446   5
  -7  -4   1 12.1077 4.01464   2
  -7  -4   1 5.30641 4.15973   6
  -7   4   1 9.87033 3.99176   1
  -7   4   1 5.17032 3.17572   6
   7   4  -1 12.3131 4.81278   3
  -6  -4   1 119.041 8.79876   5
  -6  -4   1 116.094 10.5251   2
  -6  -4   1 131.138 11.8929   6
  -6  -4   1 123.087 8.83089   5
  -6  -4   1 110.019 8.81971   4
   6   4  -1 116.023 11.5331   3
  -6   4   1 124.325 9.16734   4
  -6   4   1 110.494 10.7904   1
  -6   4   1 127.632 10.0911   6
  -5  -4   1 14.3792 4.12760   2
  -5  -4   1 17.0645 2.75598   5
  -5  -4   1 18.7990 2.61214   7
  -5  -4   1 15.3338 2.61180   7
  -5  -4   1 15.0223 2.67939   5
   5   4  -1 20.6064 5.19489   3
  -5   4   1 23.7916 4.60083   1
  -5   4   1 19.6786 3.78061   6
  -5   4   1 16.9416 2.90900   4
  -4  -4   1 58.2922 5.79433   7
  -4  -4   1 56.0950 5.49893   7
  -4  -4   1 54.9249 6.92098   2
   4  -4  -1 61.3371 6.42349   7
  -4  -4   1 51.9311 5.47383   5
   4   4  -1 91.5179 9.07032   3
  -4   4   1 99.0411 7.87114   1
   3  -4  -1 44.9510 5.54984   7
  -3  -4   1 52.0349 5.27321   7
  -3  -4   1 42.8053 5.83625   2
  -3  -4   1 43.8816 5.38216   7
   3  -4  -1 46.3242 4.35798   4
  -3  -4   1 50.8145 5.06048   5
   3  -4  -1 41.9245 4.83776   5
   3  -4  -1 43.2923 4.36129   4
  -3   4   1 40.5416 5.10458   7
  -3   4   1 44.2958 5.31770   5
  -3   4   1 50.8397 5.27889   4
   3   4  -1 54.6604 6.90875   3
  -3   4   1 39.1265 5.61595   1
  -3   4   1 44.3056 4.96368   3
  -3   4   1 42.5053 4.64568   6
  -2  -4   1 554.050 36.8717   5
  -2  -4   1 551.172 37.1943   2
   2  -4  -1 551.334 36.8601   5
   2  -4  -1 519.776 37.2480   7
  -2  -4   1 564.967 37.2441   7
  -2  -4   1 557.574 36.7672   4
   2  -4  -1 553.819 36.5953   2
   2  -4  -1 541.121 36.3101   6
   2  -4  -1 566.560 36.6439   4
   2  -4  -1 528.315 36.5789   4
  -2  -4   1 545.294 36.9759   7
  -2   4   1 562.618 37.1605   1
  -2   4   1 581.842 36.5335   2
  -2   4   1 569.350 36.9411   4
  -2   4   1 556.030 37.1562   7
  -2   4   1 567.843 37.3845   7
  -2   4   1 510.408 36.8189   5
   2   4  -1 518.526 36.8198   7
   2   4  -1 525.467 37.2734   3
  -2   4   1 558.652 36.2550   6
   1  -4  -1 223.078 16.8129   5
   1  -4  -1 218.035 16.6320   4
  -1  -4   1 251.192 16.6562   3
   1  -4  -1 212.643 17.0909   7
  -1  -4   1 243.774 17.2840   7
  -1  -4   1 232.548 16.8013   5
   1  -4  -1 244.920 15.9481   6
   1  -4  -1 244.637 16.8674   5
  -1  -4   1 237.684 16.7655   4
  -1  -4   1 234.371 16.6813   2
   1  -4  -1 238.181 16.3169   2
  -1  -4   1 239.227 16.8715   7
   1   4  -1 237.657 17.3054   5
   1   4  -1 229.605 16.9967   7
  -1   4   1 248.341 16.6947   1
  -1   4   1 212.715 16.8304   7
  -1   4   1 237.745 17.3211   7
  -1   4   1 217.897 16.5444   4
  -1   4   1 232.578 16.9109   5
  -1   4   1 257.281 16.4141   2
  -1   4   1 218.553 15.9222   6
   1   4  -1 233.921 16.7522   1
   1   4  -1 223.791 16.6903   3
   0  -4  -1 136.212 10.5926   7
   0  -4  -1 125.814 9.54306   2
   0  -4  -1 123.915 9.98785   5
   0  -4   1 111.911 10.2268   7
   0  -4   1 130.981 9.31633   6
   0  -4   1 128.818 10.2628   7
   0  -4  -1 123.254 10.1206   7
   0  -4  -1 128.161 10.0179   5
   0  -4   1 132.992 9.83338   2
   0  -4  -1 122.832 8.91025   3
   0  -4   1 131.208 8.95202   3
   0  -4  -1 116.230 9.27632   6
   0  -4   1 127.534 10.1074   5
   0  -4   1 131.966 10.0329   4
   0   4   1 117.108 9.51045   1
   0   4  -1 141.650 10.1554   5
   0   4   1 121.740 9.05132   3
   0   4  -1 118.014 10.1259   7
   0   4   1 114.441 10.2585   7
   0   4   1 126.050 10.0486   5
   0   4  -1 112.731 10.4816   7
   0   4   1 120.163 9.68857   2
   0   4  -1 129.281 9.07400   3
   0   4   1 131.865 9.55170   6
   0   4  -1 131.337 9.63663   1
   0   4   1 129.332 10.2903   7
   1  -4   1 10.6111 2.95705   2
  -1  -4  -1 7.54135 2.79777   5
   1  -4   1 10.5865 2.94161   4
   1  -4   1 12.6866 2.99436   5
  -1  -4  -1 15.3619 3.34144   2
   1  -4   1 19.3190 4.16117   7
   1  -4   1 8.31809 3.04105   5
  -1  -4  -1 9.02882 3.26907   7
   1  -4   1 13.6083 3.07292   4
  -1  -4  -1 6.24467 2.69457   5
   1  -4   1 19.5927 2.13185   6
  -1  -4  -1 10.2041 3.32890   3
  -1  -4  -1 10.1232 3.07229   7
  -1   4  -1 10.6732 1.91188   6
   1   4   1 6.88336 2.93690   1
   1   4   1 10.2784 3.06091   3
   1   4   1 4.88644 2.89393   7
  -1   4  -1 10.1924 2.74926   1
  -1   4  -1 8.09329 2.99183   7
  -1   4  -1 8.94939 3.08692   5
  -1   4  -1 8.30879 3.24857   7
  -2  -4  -1 45.2089 6.37272   2
   2  -4   1 52.6638 5.99465   5
   2  -4   1 56.7128 5.48390   4
  -2  -4  -1 57.3019 6.15920   5
   2  -4   1 57.2433 5.00348   6
   2  -4   1 52.3918 5.69414   4
  -2  -4  -1 57.1567 6.26575   7
   2  -4   1 63.2574 6.34754   2
  -2  -4  -1 44.5167 6.04946   7
   2  -4   1 49.8407 6.46335   7
  -2  -4  -1 52.6918 5.79194   5
  -2   4  -1 71.1322 5.97448   4
  -2   4  -1 70.7128 4.82544   6
  -2   4  -1 70.6192 5.99862   1
   2   4   1 74.0097 7.40982   3
  -2   4  -1 62.9554 5.93507   5
  -2   4  -1 65.8590 6.84994   7
   2   4   1 65.2147 6.29127   1
   2   4   1 73.2578 6.12954   7
  -2   4  -1 66.9861 4.75115   3
   3  -4   1 25.9737 2.83509   4
  -3  -4  -1 27.5369 4.89522   2
   3  -4   1 23.3529 3.39788   5
   3  -4   1 25.9900 4.18536   7
  -3  -4  -1 24.9326 3.63158   7
  -3  -4  -1 25.0468 3.52747   5
   3  -4   1 21.1613 2.71086   4
  -3  -4  -1 25.5655 3.80647   7
   3  -4   1 28.4730 3.50009   6
  -3  -4  -1 24.2609 3.45526   5
  -3   4  -1 26.4796 4.08213   7
  -3   4  -1 19.7150 3.48692   5
  -3   4  -1 23.5002 3.98032   1
  -3   4  -1 21.6426 2.96811   6
   3   4   1 18.2688 4.65714   3
  -3   4  -1 21.2586 3.14559   3
   3   4   1 16.6486 3.29699   7
  -3   4  -1 18.7178 3.36666   4
  -4  -4  -1 197.270 14.0792   7
  -4  -4  -1 202.390 14.1297   5
  -4  -4  -1 204.833 14.1548   5
  -4  -4  -1 203.167 15.5663   2
  -4  -4  -1 204.405 14.0955   7
   4  -4   1 209.083 14.5859   3
   4  -4   1 221.631 14.7402   7
  -4   4  -1 173.521 13.9620   4
  -4   4  -1 198.522 15.2353   1
   4   4   1 159.719 15.3190   3
  -4   4  -1 189.463 14.1168   6
  -5  -4  -1 28.3724 3.07083   7
   5  -4   1 28.2131 4.80150   3
  -5  -4  -1 29.2607 3.49523   5
  -5  -4  -1 29.7074 3.54453   5
  -5  -4  -1 30.5574 3.23596   7
  -5  -4  -1 34.5069 5.39748   2
  -5   4  -1 24.4153 3.52730   4
  -5   4  -1 23.7541 3.98945   6
  -5   4  -1 33.0291 5.35916   1
   5   4   1 23.4598 5.31375   3
  -6  -4  -1 12.8603 2.34843   5
  -6  -4  -1 16.3488 4.54305   2
  -6  -4  -1 20.1377 2.62736   5
   6   4   1 19.9465 5.38948   3
  -6   4  -1 20.2805 2.95812   4
  -6   4  -1 18.8079 3.94713   6
  -6   4  -1 17.7299 4.25510   1
  -7  -4  -1 23.6688 2.43225   5
  -7  -4  -1 14.8112 4.51752   2
  -7  -4  -1 24.0925 5.52559   6
  -7  -4  -1 18.9298 2.18359   5
  -7   4  -1 15.1404 4.41421   1
   7   4   1 22.1782 5.90085   3
  -7   4  -1 20.7502 4.32483   6
  -8  -4  -1 5.82845 4.00292   6
  -8  -4  -1 8.75198 3.63164   2
  -8  -4  -1 4.36317 4.13313   1
   8   4   1 5.20473 4.40476   3
  -8   4  -1 2.44745 3.12414   1
  -9  -4  -1 6.77328 3.60672   2
  -9  -4  -1 8.06048 4.11654   6
  -9  -4  -1 8.54363 4.02261   1
  -9   4  -1 1.09470 3.51619   1
   9   4   1 11.0387 4.91760   3
  -9  -5   1 6.00020 3.99688   6
  -9  -5   1 0.67289 2.73156   2
  -9  -5   1 1.05431 4.01873   1
  -9   5   1 0.96166 3.17497   1
   9   5  -1 5.82842 4.71529   3
  -8  -5   1 3.63492 3.40950   2
  -8  -5   1 3.88266 1.27513   5
  -8  -5   1 4.78889 1.41715   5
  -8  -5   1 5.73537 4.29835   6
   8   5  -1 5.75579 4.43703   3
  -8   5   1 1.90027 3.36332   1
  -7  -5   1 -0.5325 2.89600   2
  -7  -5   1 9.24010 4.60037   6
  -7  -5   1 3.73150 1.62749   5
  -7  -5   1 2.09390 1.73071   5
  -7   5   1 -0.5916 3.49698   1
  -7   5   1 1.88816 2.62859   6
   7   5  -1 3.52294 4.17005   3
  -6  -5   1 43.0293 4.22894   7
  -6  -5   1 40.9558 6.59594   2
  -6  -5   1 45.9310 5.15079   4
  -6  -5   1 42.0221 4.92587   5
  -6  -5   1 53.0225 5.26293   5
  -6   5   1 69.8645 7.96079   1
   6   5  -1 69.2811 9.04634   3
  -6   5   1 61.9608 6.12228   6
  -6   5   1 65.1925 5.65392   4
  -5  -5   1 21.9288 3.45547   7
  -5  -5   1 23.3187 3.43608   5
  -5  -5   1 16.8784 3.08579   7
   5  -5  -1 27.4368 4.06436   7
  -5  -5   1 21.4826 3.44560   4
  -5  -5   1 22.5559 3.47585   5
  -5  -5   1 19.5575 4.48087   2
  -5   5   1 18.4431 3.57278   6
  -5   5   1 21.2029 3.55255   4
  -5   5   1 21.0293 4.58610   1
   5   5  -1 21.9211 5.34064   3
  -4  -5   1 352.043 22.2689   7
  -4  -5   1 345.250 22.0517   7
   4  -5  -1 324.987 20.8055   4
  -4  -5   1 327.225 22.9422   2
   4  -5  -1 335.074 22.4154   7
   4  -5  -1 326.464 20.8250   4
  -4  -5   1 321.875 21.8724   5
  -4   5   1 279.241 21.7390   4
  -4   5   1 301.375 22.0513   7
  -4   5   1 287.933 21.5729   6
   4   5  -1 268.615 23.0113   3
  -4   5   1 276.443 22.5031   1
  -3  -5   1 61.7008 6.56477   4
  -3  -5   1 64.2487 6.83634   7
   3  -5  -1 71.9145 6.02062   4
   3  -5  -1 61.7724 7.34691   7
   3  -5  -1 65.4282 6.31280   5
  -3  -5   1 68.2680 6.54355   5
   3  -5  -1 63.5154 5.95565   4
  -3  -5   1 80.4114 7.92699   2
   3  -5  -1 66.4713 6.40930   2
  -3  -5   1 70.1247 7.35785   7
  -3   5   1 81.0157 5.89957   6
  -3   5   1 57.6056 6.75124   7
  -3   5   1 57.6586 5.77258   3
   3   5  -1 70.9567 7.87202   3
  -3   5   1 57.2635 6.50493   4
  -3   5   1 70.5644 6.86777   1
   2  -5  -1 311.669 22.1074   2
   2  -5  -1 308.696 21.7772   6
  -2  -5   1 318.338 22.5613   5
  -2  -5   1 352.189 23.2542   7
   2  -5  -1 298.339 22.3402   4
  -2  -5   1 345.896 22.8815   2
   2  -5  -1 322.626 23.1496   7
  -2  -5   1 333.677 22.6026   4
  -2  -5   1 317.345 22.8105   7
  -2   5   1 321.612 23.2346   7
  -2   5   1 302.432 21.6565   6
   2   5  -1 356.052 23.2198   3
  -2   5   1 305.937 22.6488   1
   2   5  -1 331.836 22.9134   1
  -2   5   1 314.866 22.8469   7
  -2   5   1 338.463 22.6569   4
   2   5  -1 315.509 22.7095   7
  -2   5   1 314.681 22.6706   5
  -1  -5   1 21.5972 4.19892   5
  -1  -5   1 24.9567 4.62486   7
   1  -5  -1 30.4212 4.56180   4
  -1  -5   1 27.7099 4.80076   7
   1  -5  -1 28.2489 5.04143   7
   1  -5  -1 30.2049 3.36180   6
  -1  -5   1 31.1083 4.38151   2
  -1  -5   1 32.8643 4.59774   4
   1  -5  -1 23.6277 3.59441   2
   1  -5  -1 24.0986 4.27526   5
  -1   5   1 19.4419 4.25522   7
   1   5  -1 28.3023 4.53877   7
  -1   5   1 20.9875 3.12535   6
  -1   5   1 22.9068 2.50691   3
  -1   5   1 17.3885 3.30754   1
   1   5  -1 18.7835 3.80707   3
  -1   5   1 19.5554 3.88691   4
   1   5  -1 23.5291 4.07121   1
   0  -5   1 1269.21 82.8969   4
   0  -5  -1 1258.43 83.4218   7
   0  -5   1 1307.10 82.6288   2
   0  -5   1 1247.27 82.1035   6
   0  -5  -1 1312.43 83.0488   4
   0  -5   1 1296.86 83.4941   7
   0  -5  -1 1202.50 82.9272   5
   0  -5  -1 1292.12 83.0262   5
   0  -5   1 1220.59 81.7329   3
   0  -5  -1 1257.57 81.8107   3
   0  -5  -1 1199.98 82.3918   2
   0  -5   1 1284.86 83.0194   5
   0   5   1 1274.87 82.4393   6
   0   5  -1 1132.64 82.4100   1
   0   5  -1 1354.47 83.3151   7
   0   5   1 1263.38 83.2032   7
   0   5   1 1313.27 82.0448   3
   0   5  -1 1322.46 83.1044   5
   0   5  -1 1224.59 81.9103   3
   0   5   1 1224.31 82.5438   1
  -1  -5  -1 96.2830 8.43239   2
  -1  -5  -1 77.2125 8.47727   7
   1  -5   1 99.6105 8.17685   2
   1  -5   1 93.6480 8.49391   5
  -1  -5  -1 97.7883 9.00437   7
   1  -5   1 101.469 7.25475   6
  -1  -5  -1 101.983 8.68826   5
   1  -5   1 85.2245 8.91733   7
  -1  -5  -1 106.425 8.94956   5
   1  -5   1 91.6295 8.47796   4
  -1   5  -1 101.976 8.23980   1
  -1   5  -1 96.1474 8.75618   7
   1   5   1 96.7970 8.88371   7
  -1   5  -1 98.5715 6.53058   3
   1   5   1 98.2169 8.13069   3
  -1   5  -1 80.0738 8.46376   5
  -1   5  -1 101.295 7.34777   6
   1   5   1 112.666 8.43159   1
   2  -5   1 48.1396 4.96901   6
  -2  -5  -1 50.8341 6.63669   2
   2  -5   1 52.7980 6.14416   2
   2  -5   1 52.6907 6.95198   7
  -2  -5  -1 45.4087 6.05445   5
  -2  -5  -1 43.8972 6.53961   7
  -2  -5  -1 50.2545 6.38965   7
  -2  -5  -1 52.8753 6.27945   5
   2  -5   1 51.8337 6.09722   4
  -2   5  -1 80.8813 7.87492   7
   2   5   1 66.9603 6.58726   1
  -2   5  -1 73.6055 6.85562   7
  -2   5  -1 78.4265 7.32935   5
   2   5   1 66.9677 7.03111   7
  -2   5  -1 74.8600 6.42713   1
  -2   5  -1 75.5229 5.17378   6
   2   5   1 78.9585 7.12110   3
  -2   5  -1 73.4005 4.54765   3
   3  -5   1 14.0128 2.78736   4
  -3  -5  -1 19.6698 4.33824   2
   3  -5   1 17.6075 3.86754   7
   3  -5   1 23.7220 3.93423   2
  -3  -5  -1 25.0637 4.25498   7
   3  -5   1 17.6802 3.36907   5
   3  -5   1 16.1901 2.69246   6
  -3  -5  -1 18.4975 3.39547   5
   3  -5   1 18.3562 2.87727   4
  -3  -5  -1 13.7141 3.03200   5
  -3  -5  -1 23.4884 3.91820   7
  -3   5  -1 14.3713 3.42782   7
   3   5   1 11.6807 3.20529   7
  -3   5  -1 16.5003 3.67442   1
  -3   5  -1 12.3313 2.49207   3
   3   5   1 22.9438 4.82198   3
  -3   5  -1 13.8696 2.36056   6
  -3   5  -1 21.0692 3.53522   4
   4  -5   1 138.297 10.0359   4
   4  -5   1 141.369 11.8173   7
  -4  -5  -1 151.500 12.6295   2
  -4  -5  -1 151.666 11.5536   7
  -4  -5  -1 145.647 11.4417   5
  -4  -5  -1 139.100 11.3533   5
  -4  -5  -1 136.990 11.3119   7
  -4   5  -1 169.585 11.9525   7
   4   5   1 172.513 13.4083   3
  -4   5  -1 159.742 12.3163   1
  -4   5  -1 159.375 11.0905   6
   4   5   1 171.890 11.6503   7
  -4   5  -1 161.416 11.6073   4
   5  -5   1 24.9257 3.95955   7
  -5  -5  -1 22.3414 4.77684   2
  -5  -5  -1 23.9905 3.53143   5
  -5  -5  -1 24.3498 3.40762   5
  -5  -5  -1 24.9317 3.34942   7
  -5  -5  -1 23.7930 3.38798   7
   5   5   1 22.0326 5.06463   3
  -5   5  -1 17.8798 3.32728   6
  -5   5  -1 18.1637 4.32698   1
  -5   5  -1 15.0842 3.08726   4
  -6  -5  -1 89.5394 9.81266   2
  -6  -5  -1 87.5866 7.36888   5
  -6  -5  -1 75.6609 6.43914   7
  -6  -5  -1 85.5080 7.34681   5
  -6   5  -1 113.942 7.96570   4
  -6   5  -1 107.603 9.19837   1
   6   5   1 121.069 10.6792   3
  -6   5  -1 110.262 8.05083   6
  -7  -5  -1 5.12166 1.68991   5
  -7  -5  -1 2.78103 1.59996   5
  -7  -5  -1 7.77669 3.71127   2
   7   5   1 3.82861 4.38207   3
  -7   5  -1 8.39120 3.93404   1
  -7   5  -1 6.20965 2.92615   6
  -8  -5  -1 15.7005 4.67536   2
  -8  -5  -1 7.67978 5.02893   6
  -8  -5  -1 5.63561 1.22512   5
  -8  -5  -1 4.23144 1.05186   5
   8   5   1 3.91589 4.26555   3
  -8   5  -1 2.90788 3.53627   1
  -9  -5  -1 7.17419 3.97817   2
  -9  -5  -1 2.03118 3.48703   1
  -9  -5  -1 6.97493 4.31287   6
   9   5   1 7.58620 5.27781   3
  -9   5  -1 6.99694 3.41797   1
  -9  -6   1 -6.7029 3.12563   6
  -9  -6   1 -1.3682 3.37016   2
   9   6  -1 -3.4577 3.80706   3
  -9   6   1 -1.3094 3.33863   1
  -8  -6   1 2.24619 3.62893   2
  -8  -6   1 0.18993 1.50064   5
  -8  -6   1 3.71186 1.81722   5
  -8  -6   1 1.70709 4.32933   6
  -8   6   1 5.81808 3.90355   1
   8   6  -1 8.07908 5.11035   3
  -7  -6   1 6.99650 2.26887   5
  -7  -6   1 4.82110 2.09522   5
  -7  -6   1 6.07169 4.34049   6
  -7  -6   1 8.52467 4.02185   2
   7   6  -1 6.53927 4.36810   3
  -7   6   1 8.10212 3.05305   6
  -7   6   1 7.85645 4.07650   1
  -6  -6   1 79.1041 7.19308   5
  -6  -6   1 86.2286 9.45742   2
  -6  -6   1 82.8774 7.25409   5
  -6  -6   1 85.5761 7.19822   7
  -6  -6   1 74.1535 7.17692   4
   6   6  -1 75.7945 10.0755   3
  -6   6   1 92.9893 7.75035   4
  -6   6   1 93.3703 8.81564   1
  -6   6   1 85.4781 7.43449   6
  -5  -6   1 54.9182 5.79294   5
  -5  -6   1 44.9675 5.56007   7
  -5  -6   1 58.6276 7.11907   2
  -5  -6   1 51.9180 5.58831   5
  -5  -6   1 44.2272 5.43295   7
   5  -6  -1 48.1624 6.16438   7
  -5  -6   1 41.8339 5.45444   4
  -5   6   1 47.7825 6.57805   1
  -5   6   1 44.8697 5.34567   6
  -5   6   1 43.1911 5.47499   4
   5   6  -1 44.2400 7.34477   3
   4  -6  -1 156.808 11.1225   4
  -4  -6   1 149.300 12.6333   2
  -4  -6   1 159.400 12.0873   5
   4  -6  -1 154.367 12.4778   7
  -4  -6   1 153.436 11.8879   5
   4  -6  -1 134.439 11.6833   5
   4  -6  -1 158.276 11.1421   4
  -4  -6   1 146.008 11.7575   4
  -4  -6   1 146.154 11.9151   7
  -4  -6   1 164.753 12.2829   7
  -4   6   1 159.789 12.4409   1
   4   6  -1 142.865 13.3871   3
  -4   6   1 153.335 11.3207   6
  -4   6   1 140.956 11.9847   7
  -4   6   1 156.623 12.0298   4
  -3  -6   1 7.11938 3.11821   4
   3  -6  -1 7.57102 3.62223   7
   3  -6  -1 10.3822 3.15397   2
  -3  -6   1 5.94894 2.85919   5
  -3  -6   1 9.28373 3.49565   7
   3  -6  -1 5.80832 2.85652   5
   3  -6  -1 7.22063 2.68439   4
  -3  -6   1 10.3949 3.69168   2
  -3  -6   1 8.26790 3.30014   7
  -3   6   1 11.8747 2.32083   3
  -3   6   1 10.9277 3.54652   1
  -3   6   1 9.82705 3.49670   7
  -3   6   1 10.3156 2.33467   6
  -3   6   1 11.3463 3.41053   4
  -3   6   1 6.37565 3.43854   7
   3   6  -1 14.4743 4.21894   3
   2  -6  -1 144.565 11.3292   2
  -2  -6   1 158.402 12.0912   2
  -2  -6   1 158.700 12.3985   7
  -2  -6   1 145.025 11.8581   5
   2  -6  -1 142.559 11.6970   4
   2  -6  -1 158.054 12.6022   7
  -2  -6   1 139.163 11.6456   4
   2   6  -1 146.659 12.2866   3
  -2   6   1 145.893 11.7457   1
   2   6  -1 150.694 12.2041   1
   2   6  -1 136.756 11.9381   7
  -2   6   1 149.604 11.8776   4
  -2   6   1 138.715 10.7169   6
  -2   6   1 156.361 12.3180   7
  -1  -6   1 52.2125 6.80846   7
   1  -6  -1 51.0173 6.79095   7
  -1  -6   1 57.7001 6.29991   2
  -1  -6   1 38.7286 5.83957   5
   1  -6  -1 49.1209 6.18004   5
   1  -6  -1 47.7805 6.02892   4
  -1  -6   1 52.9064 6.43963   4
   1  -6  -1 54.6912 5.58066   2
   1   6  -1 39.3240 5.97395   7
   1   6  -1 52.6045 5.75855   3
  -1   6   1 42.7131 3.91467   3
  -1   6   1 41.6736 4.77156   6
  -1   6   1 41.9519 5.57202   4
  -1   6   1 42.7531 6.30184   7
   1   6  -1 38.4623 5.52355   1
  -1   6   1 44.4198 5.55150   1
   0  -6  -1 8.74660 2.15686   3
   0  -6   1 8.46251 3.30221   5
   0  -6   1 5.01748 2.94401   5
   0  -6  -1 11.7771 3.50525   5
   0  -6  -1 8.99310 3.29400   2
   0  -6  -1 8.38335 3.30533   5
   0  -6   1 6.57572 1.90303   3
   0  -6  -1 9.45390 4.28850   7
   0  -6  -1 4.28683 3.51123   4
   0  -6   1 9.39212 3.86142   7
   0  -6   1 2.90837 2.71709   2
   0  -6   1 5.67824 3.21587   4
   0   6  -1 10.8198 3.54036   5
   0   6  -1 7.16848 2.87528   1
   0   6   1 4.20688 2.96637   7
   0   6  -1 8.74259 2.36477   3
   0   6  -1 7.37710 3.68855   7
   0   6   1 10.5034 2.96399   6
   0   6   1 3.53479 2.73793   1
   0   6   1 13.0558 2.68194   3
  -1  -6  -1 25.0588 4.22261   2
   1  -6   1 22.1563 2.93371   6
  -1  -6  -1 21.1580 4.25570   5
  -1  -6  -1 20.9958 4.40153   5
   1  -6   1 21.2941 4.17210   4
   1  -6   1 21.6230 4.30693   5
  -1  -6  -1 18.3213 4.63463   7
   1  -6   1 16.3019 3.62696   2
   1  -6   1 20.1770 4.74387   7
  -1   6  -1 25.2860 4.52406   7
   1   6   1 21.3548 3.84449   1
   1   6   1 22.2952 4.07394   3
  -1   6  -1 22.4838 2.16517   3
  -1   6  -1 22.3048 3.96946   1
  -1   6  -1 17.6433 4.24501   5
  -1   6  -1 21.6010 3.13787   6
   1   6   1 21.0786 4.57178   7
   2  -6   1 88.2828 8.37199   4
  -2  -6  -1 89.9924 9.00184   7
  -2  -6  -1 91.4767 8.74638   5
   2  -6   1 86.8211 8.55204   2
   2  -6   1 106.572 10.6308   7
  -2  -6  -1 99.0990 8.74887   2
  -2  -6  -1 90.3057 8.74155   7
   2  -6   1 89.2091 7.40200   6
  -2  -6  -1 87.8252 8.63991   5
  -2   6  -1 109.357 7.42938   6
  -2   6  -1 108.375 9.13740   7
   2   6   1 103.584 9.07163   3
  -2   6  -1 107.813 8.66299   1
   2   6   1 120.005 9.22670   1
   2   6   1 105.520 9.33619   7
   3  -6   1 11.1866 2.37559   6
   3  -6   1 10.7529 3.13433   5
   3  -6   1 7.72312 2.65712   4
   3  -6   1 5.47212 3.31108   7
  -3  -6  -1 11.6695 3.77862   2
  -3  -6  -1 4.52626 2.76284   5
  -3  -6  -1 12.3394 3.61906   7
  -3  -6  -1 17.1144 3.52012   5
   3  -6   1 6.74063 3.21506   2
  -3  -6  -1 12.0973 3.34459   7
  -3   6  -1 15.9130 3.97350   7
  -3   6  -1 7.43478 1.82802   3
   3   6   1 7.63112 3.33122   7
  -3   6  -1 13.5275 3.54997   1
   3   6   1 10.7683 4.37264   3
  -3   6  -1 11.8470 3.14971   4
  -3   6  -1 7.17550 1.93407   6
   4  -6   1 209.138 15.4238   5
  -4  -6  -1 215.467 15.4820   5
  -4  -6  -1 227.985 15.8538   7
  -4  -6  -1 209.139 15.4617   5
   4  -6   1 220.967 14.6616   4
  -4  -6  -1 229.157 16.7327   2
  -4  -6  -1 222.763 15.7950   7
   4  -6   1 224.755 14.6502   4
   4  -6   1 230.630 16.2398   7
  -4   6  -1 193.006 14.5952   6
   4   6   1 194.819 15.5008   7
  -4   6  -1 188.545 15.8035   7
  -4   6  -1 181.230 15.6888   1
   4   6   1 216.193 17.0250   3
  -4   6  -1 203.433 15.4304   4
  -5  -6  -1 0.02177 3.48626   2
   5  -6   1 6.41982 2.91814   7
  -5  -6  -1 2.56283 2.21059   5
  -5  -6  -1 6.05133 2.67657   7
  -5  -6  -1 2.46582 2.32506   5
  -5   6  -1 4.26158 2.49771   4
  -5   6  -1 1.34934 2.73646   1
  -5   6  -1 4.83725 2.18344   6
   5   6   1 0.57733 3.61987   3
  -6  -6  -1 20.7811 5.39346   2
  -6  -6  -1 17.3484 3.17898   5
  -6  -6  -1 21.6121 3.27622   7
  -6  -6  -1 18.0143 3.27378   5
  -6   6  -1 18.2463 4.34455   1
  -6   6  -1 25.8604 3.78593   6
  -6   6  -1 29.7409 4.07478   4
   6   6   1 26.5644 6.40756   3
  -7  -6  -1 3.42121 1.94540   5
  -7  -6  -1 7.57400 3.94032   2
  -7  -6  -1 3.46406 1.91065   5
  -7   6  -1 6.31500 3.89909   1
   7   6   1 6.64511 4.67286   3
  -8  -6  -1 22.0393 5.10277   2
  -8  -6  -1 9.12514 4.66531   6
  -8  -6  -1 12.4166 2.19838   5
  -8  -6  -1 9.74630 2.01150   5
   8   6   1 17.6603 6.05675   3
  -8   6  -1 13.1792 4.42105   1
  -9  -6  -1 2.89964 3.90300   2
  -9  -6  -1 9.04158 4.68380   6
   9   6   1 3.69048 4.45672   3
  -9   6  -1 5.09785 3.60271   1
  -9  -7   1 6.25244 3.90265   2
  -9  -7   1 4.55557 4.48083   6
  -9  -7   1 4.51904 1.49730   5
  -9   7   1 2.58630 3.32505   1
   9   7  -1 2.25831 3.88358   3
  -8  -7   1 18.8179 4.71607   2
  -8  -7   1 16.1998 5.43406   6
  -8  -7   1 14.3600 2.78847   5
   8   7  -1 6.72272 4.73465   3
  -8   7   1 6.90120 3.95399   1
  -7  -7   1 16.6454 4.41436   2
  -7  -7   1 16.2996 3.05841   5
   7   7  -1 9.49445 4.65340   3
  -7   7   1 12.1149 4.24971   1
  -6  -7   1 47.2307 5.90390   4
  -6  -7   1 59.6333 6.16418   7
  -6  -7   1 41.4935 5.48742   5
  -6  -7   1 46.3668 5.64753   5
  -6  -7   1 49.8064 7.15380   2
  -6   7   1 59.3327 5.48075   6
  -6   7   1 67.1096 6.57637   4
   6   7  -1 63.7285 8.95460   3
  -6   7   1 47.5736 6.82023   1
  -5  -7   1 10.3540 3.12705   5
  -5  -7   1 7.00095 3.70537   2
  -5  -7   1 7.09871 3.01923   7
  -5  -7   1 8.03650 2.94688   4
   5  -7  -1 10.0362 3.43875   7
  -5  -7   1 10.6615 2.97614   5
  -5   7   1 11.0330 3.17416   4
  -5   7   1 7.72527 2.52176   6
  -5   7   1 7.45638 3.47256   1
   5   7  -1 5.93954 4.26251   3
  -4  -7   1 262.050 19.8234   7
  -4  -7   1 286.594 19.8090   5
  -4  -7   1 277.644 19.7300   4
  -4  -7   1 271.777 19.6862   5
   4  -7  -1 272.407 18.8498   4
  -4  -7   1 258.530 19.5503   7
   4  -7  -1 277.654 20.1386   7
   4  -7  -1 243.882 19.2998   5
  -4  -7   1 247.713 19.8786   2
  -4   7   1 261.918 19.4417   4
   4   7  -1 293.795 21.0736   3
  -4   7   1 261.440 19.9753   1
  -4   7   1 270.525 18.6316   6
  -4   7   1 278.054 20.0029   7
  -3  -7   1 37.7185 5.49967   5
  -3  -7   1 31.7581 5.06465   5
   3  -7  -1 40.0777 5.37330   2
  -3  -7   1 34.3972 5.28719   4
  -3  -7   1 35.7929 5.76526   2
   3  -7  -1 46.5802 5.76052   5
   3  -7  -1 31.8836 4.75080   4
   3  -7  -1 33.0148 5.55315   7
  -3  -7   1 41.4742 6.07823   7
   3   7  -1 34.4237 5.74178   3
  -3   7   1 38.0459 3.69511   3
  -3   7   1 41.3887 5.70074   4
  -3   7   1 43.0720 4.34373   6
  -3   7   1 45.3467 5.95907   1
  -3   7   1 31.2326 5.53345   7
   2  -7  -1 24.5921 4.60791   5
  -2  -7   1 22.3839 4.59705   2
   2  -7  -1 24.2384 4.65430   4
  -2  -7   1 29.2314 4.98362   5
   2  -7  -1 21.9233 4.27929   2
  -2  -7   1 29.9859 5.25384   4
   2  -7  -1 22.3979 5.26047   7
  -2  -7   1 27.4654 5.15217   7
  -2   7   1 25.2967 3.62228   6
   2   7  -1 31.5905 5.11575   3
  -2   7   1 27.7502 5.19452   7
  -2   7   1 37.5190 5.18433   1
   2   7  -1 47.5262 6.07674   1
  -2   7   1 39.1182 5.23365   4
   2   7  -1 25.6643 5.03906   7
   1  -7  -1 28.9599 4.49507   2
  -1  -7   1 35.4437 5.98038   7
   1  -7  -1 34.8249 5.26702   5
  -1  -7   1 40.6336 5.71661   5
   1  -7  -1 35.4049 5.52104   4
   1  -7  -1 34.3783 6.10134   7
  -1  -7   1 49.3600 5.73778   2
  -1  -7   1 39.3541 5.61721   5
  -1  -7   1 34.0689 5.41898   4
   1   7  -1 34.6836 4.86532   3
  -1   7   1 26.7504 4.84694   1
  -1   7   1 36.2582 4.49241   6
  -1   7   1 29.7927 3.38845   3
   1   7  -1 26.5077 5.21228   7
  -1   7   1 31.9954 5.64106   7
   1   7  -1 29.3218 5.04256   1
   0  -7  -1 2483.09 164.630   3
   0  -7  -1 2553.39 165.853   4
   0  -7   1 2707.74 165.533   2
   0  -7   1 2473.59 165.803   5
   0  -7  -1 2504.10 165.830   5
   0  -7  -1 2518.52 165.275   2
   0  -7  -1 2678.10 166.537   7
   0  -7   1 2476.43 165.777   4
   0  -7  -1 2575.06 165.963   5
   0  -7   1 2490.42 166.322   7
   0  -7   1 2578.78 164.270   3
   0   7  -1 2504.04 165.370   1
   0   7  -1 2601.37 164.553   3
   0   7   1 2507.39 165.108   6
   0   7  -1 2536.96 166.116   7
   0   7   1 2551.21 166.231   7
   0   7   1 2512.63 164.621   3
   0   7   1 2532.80 165.383   1
  -1  -7  -1 109.358 10.9219   7
   1  -7   1 100.533 9.21325   5
  -1  -7  -1 90.2263 9.14862   5
   1  -7   1 92.5879 8.69338   2
   1  -7   1 97.0116 10.8223   7
  -1  -7  -1 98.8074 9.27153   4
  -1  -7  -1 87.4169 9.02761   5
  -1  -7  -1 101.684 8.95579   2
   1  -7   1 101.326 9.45609   4
  -1   7  -1 108.937 9.67445   7
   1   7   1 104.108 9.67968   7
  -1   7  -1 104.232 8.89550   1
  -1   7  -1 95.0842 7.00392   3
  -1   7  -1 101.539 7.93491   6
   1   7   1 87.8434 8.30040   3
   1   7   1 102.009 8.66198   1
  -2  -7  -1 237.720 18.2300   7
   2  -7   1 249.252 18.7093   7
  -2  -7  -1 234.231 17.7231   2
   2  -7   1 238.439 17.5152   4
  -2  -7  -1 235.684 17.7485   5
   2  -7   1 227.819 17.4449   2
  -2  -7  -1 253.109 17.8542   5
   2  -7   1 237.620 17.6945   5
   2   7   1 237.020 17.8553   3
  -2   7  -1 217.496 17.7336   7
  -2   7  -1 227.220 16.2337   6
   2   7   1 246.683 17.8437   1
   2   7   1 239.548 17.8868   7
  -2   7  -1 227.922 17.3504   1
  -3  -7  -1 119.474 9.86064   5
  -3  -7  -1 99.8014 9.71826   7
  -3  -7  -1 104.549 9.64092   5
  -3  -7  -1 122.557 10.4466   2
   3  -7   1 106.124 9.38654   2
   3  -7   1 108.214 9.66621   5
   3  -7   1 107.473 9.30988   4
  -3  -7  -1 111.878 10.2423   7
   3  -7   1 123.126 10.5727   7
  -3   7  -1 109.158 7.60076   3
  -3   7  -1 111.001 9.63613   1
   3   7   1 114.174 10.0024   7
  -3   7  -1 106.632 8.19177   6
   3   7   1 115.078 10.4380   3
  -4  -7  -1 20.8309 4.12315   5
  -4  -7  -1 21.2485 4.02879   5
  -4  -7  -1 27.0861 4.44974   7
  -4  -7  -1 24.0397 4.81393   2
   4  -7   1 19.7375 3.84346   5
   4  -7   1 23.3726 3.59095   4
   4  -7   1 25.1601 4.61583   7
  -4  -7  -1 29.5888 4.93214   7
  -4   7  -1 29.1812 4.90445   7
  -4   7  -1 22.9577 4.60326   1
   4   7   1 25.5125 4.47548   7
  -4   7  -1 24.0083 3.18164   6
  -4   7  -1 23.2569 2.86997   3
   4   7   1 20.4057 5.21922   3
  -5  -7  -1 3.29932 2.32692   5
  -5  -7  -1 2.25127 2.70293   7
  -5  -7  -1 0.55711 3.20713   2
  -5  -7  -1 2.68686 2.22105   5
   5  -7   1 1.15773 2.69281   7
  -5   7  -1 5.27493 3.68479   1
  -5   7  -1 3.65675 2.72195   4
   5   7   1 8.50223 4.49003   3
  -5   7  -1 0.29011 1.86124   6
  -6  -7  -1 167.002 12.3994   7
  -6  -7  -1 177.023 14.1984   2
  -6  -7  -1 161.625 12.4255   5
  -6  -7  -1 157.299 12.3117   5
  -6   7  -1 151.145 13.2193   1
  -6   7  -1 169.497 12.1184   6
   6   7   1 164.202 14.8551   3
  -7  -7  -1 15.1395 4.75571   2
  -7  -7  -1 14.4257 2.99195   5
  -7   7  -1 15.0648 4.22743   1
   7   7   1 16.3781 5.28025   3
  -8  -7  -1 11.5502 2.45638   5
  -8  -7  -1 9.13140 4.14360   2
  -8  -7  -1 10.8981 4.96780   6
  -8   7  -1 14.0570 4.23181   1
   8   7   1 10.1192 4.93968   3
  -9  -7  -1 4.20056 1.33146   5
  -9  -7  -1 5.12161 4.03156   2
  -9  -7  -1 3.36711 4.11036   6
  -9   7  -1 1.97851 3.01653   1
   9   7   1 4.98311 4.26268   3
  -9  -8   1 5.35557 1.88704   5
  -9  -8   1 -1.0746 3.37870   2
  -9  -8   1 4.20714 4.19006   6
   9   8  -1 0.94350 4.06662   3
  -9   8   1 1.96057 3.49371   1
  -8  -8   1 4.62385 3.77448   2
  -8  -8   1 8.46631 4.75408   6
  -8  -8   1 4.81314 2.21535   5
  -8   8   1 6.85395 3.60617   1
   8   8  -1 4.16666 4.29867   3
  -7  -8   1 21.9093 3.59497   7
  -7  -8   1 20.0134 3.72590   5
  -7  -8   1 24.4344 5.32762   2
  -7   8   1 20.9309 4.73303   1
   7   8  -1 15.5805 5.29270   3
  -6  -8   1 19.0954 4.04102   7
  -6  -8   1 18.3587 3.80562   5
  -6  -8   1 19.9559 5.10098   2
  -6  -8   1 24.2158 4.27786   4
   6   8  -1 18.4229 5.58937   3
  -6   8   1 13.0009 3.02299   6
  -6   8   1 9.63831 4.11432   1
  -6   8   1 17.6832 3.96473   4
  -5  -8   1 35.8897 5.06728   5
  -5  -8   1 27.3160 5.59641   2
   5  -8  -1 31.5221 3.78392   4
   5  -8  -1 32.2794 6.14702   7
  -5  -8   1 31.6218 5.33766   7
  -5  -8   1 36.7346 5.31585   4
  -5  -8   1 30.8398 5.03649   5
  -5   8   1 30.9480 5.01203   4
  -5   8   1 35.1189 4.24890   6
   5   8  -1 32.7146 6.57300   3
  -5   8   1 28.5894 5.26074   1
   4  -8  -1 142.926 13.8982   5
  -4  -8   1 127.084 12.2498   7
  -4  -8   1 149.137 12.3141   5
  -4  -8   1 153.215 12.2554   4
   4  -8  -1 145.285 11.8659   2
  -4  -8   1 154.341 12.7066   2
   4  -8  -1 169.769 11.8494   4
  -4  -8   1 159.730 12.2413   5
   4  -8  -1 144.899 12.8188   7
  -4   8   1 148.173 12.6900   7
  -4   8   1 143.296 10.6192   3
   4   8  -1 131.178 12.9051   3
  -4   8   1 149.063 12.4296   1
  -4   8   1 156.569 12.3276   4
  -4   8   1 146.553 11.0281   6
  -3  -8   1 29.2811 5.65913   7
  -3  -8   1 20.1796 4.50616   5
  -3  -8   1 34.4007 5.30275   5
   3  -8  -1 28.1141 4.79449   4
  -3  -8   1 34.3562 5.53257   2
   3  -8  -1 29.3125 4.49382   2
  -3  -8   1 29.9246 5.29725   4
   3  -8  -1 23.7053 5.37142   7
   3   8  -1 30.6579 5.51580   1
  -3   8   1 31.1948 5.32996   1
  -3   8   1 33.8755 3.07425   3
  -3   8   1 31.0122 3.98555   6
  -3   8   1 25.6247 5.08088   7
   3   8  -1 26.8492 5.41469   3
  -3   8   1 31.1441 5.19343   4
   2  -8  -1 102.285 8.70990   2
  -2  -8   1 97.0378 9.07305   2
   2  -8  -1 88.7289 9.11322   5
  -2  -8   1 89.7769 8.98859   4
  -2  -8   1 97.8534 9.75667   7
  -2  -8   1 97.4136 9.25085   5
   2  -8  -1 96.7163 9.03895   4
  -2  -8   1 98.7787 9.29550   5
   2  -8  -1 106.279 11.0618   7
  -2   8   1 102.593 6.95401   3
  -2   8   1 87.8675 10.0745   7
   2   8  -1 98.8431 9.41523   7
   2   8  -1 92.8568 9.18187   1
   2   8  -1 84.7790 8.78056   3
  -2   8   1 100.780 9.04934   1
  -2   8   1 105.507 8.04214   6
   1  -8  -1 23.6333 5.44739   7
  -1  -8   1 26.2710 5.00924   5
  -1  -8   1 16.5611 4.76777   7
   1  -8  -1 22.5908 4.40122   2
  -1  -8   1 23.4123 4.70410   5
  -1  -8   1 25.1032 4.94153   4
   1  -8  -1 24.5085 4.91900   4
  -1  -8   1 28.5225 4.96572   2
   1  -8  -1 25.3383 4.97315   5
  -1   8   1 18.2303 4.70388   7
   1   8  -1 16.7562 3.80440   3
   1   8  -1 22.0431 4.90305   7
  -1   8   1 24.3555 3.00386   3
   1   8  -1 19.1941 4.31344   1
  -1   8   1 18.0622 4.17861   1
  -1   8   1 22.6307 3.83144   6
   0  -8   1 150.631 12.7452   2
   0  -8  -1 172.670 13.4295   4
   0  -8   1 164.676 11.4993   3
   0  -8   1 158.110 13.2834   5
   0  -8   1 165.900 13.3072   4
   0  -8  -1 157.472 13.8971   7
   0  -8  -1 159.915 13.3566   5
   0  -8  -1 166.482 12.8627   2
   0  -8   1 158.730 13.9362   7
   0   8   1 167.313 12.9307   1
   0   8  -1 162.977 11.8199   3
   0   8  -1 161.618 12.9596   1
   0   8   1 145.629 13.5924   7
   0   8   1 155.194 11.9093   3
   0   8  -1 165.720 13.6868   7
   1  -8   1 33.4761 5.97087   7
  -1  -8  -1 31.4123 5.37649   5
  -1  -8  -1 41.6794 6.08537   5
   1  -8   1 37.6250 5.28824   2
   1  -8   1 40.7720 6.12153   4
  -1  -8  -1 32.1700 6.03340   7
  -1  -8  -1 45.7797 5.80703   2
   1  -8   1 33.9858 5.56765   5
  -1  -8  -1 31.3450 5.69431   4
  -1   8  -1 36.9876 5.41061   1
  -1   8  -1 34.3053 3.23631   3
   1   8   1 29.1798 4.62450   3
   1   8   1 36.5944 6.02601   7
  -1   8  -1 29.9450 4.15804   6
  -1   8  -1 26.6518 5.56774   7
   1   8   1 40.4221 5.56353   1
  -2  -8  -1 529.148 36.9260   5
  -2  -8  -1 511.249 37.5725   7
  -2  -8  -1 501.708 36.7835   4
  -2  -8  -1 519.818 36.7553   2
   2  -8   1 540.328 37.5654   7
  -2  -8  -1 536.662 36.9704   5
   2  -8   1 539.180 36.7061   2
   2  -8   1 513.711 36.6241   4
   2  -8   1 530.219 36.9532   5
  -2   8  -1 545.348 35.5001   6
  -2   8  -1 542.757 37.1986   7
   2   8   1 561.966 37.1746   1
   2   8   1 514.094 36.7149   3
   2   8   1 546.931 37.2575   7
  -2   8  -1 553.853 36.6939   1
   3  -8   1 3.51078 3.07803   2
  -3  -8  -1 5.40093 3.36122   7
   3  -8   1 5.53757 3.01237   4
  -3  -8  -1 7.41527 3.29604   5
  -3  -8  -1 1.41649 2.79230   4
  -3  -8  -1 -0.7736 3.06418   2
   3  -8   1 7.38723 3.91357   7
  -3  -8  -1 0.92370 2.79899   5
  -3   8  -1 0.12815 2.85899   1
   3   8   1 5.85499 3.58847   3
  -3   8  -1 2.31427 1.84081   6
   3   8   1 4.03464 3.02523   7
   3   8   1 1.05607 3.11441   1
   4  -8   1 135.429 11.0008   2
  -4  -8  -1 134.194 11.8979   7
  -4  -8  -1 147.423 10.9765   5
  -4  -8  -1 139.524 10.9010   5
   4  -8   1 128.977 10.0115   4
  -4  -8  -1 140.192 11.6784   2
  -4  -8  -1 137.891 11.2282   7
   4  -8   1 115.175 11.1549   7
  -4   8  -1 108.738 10.5235   1
  -4   8  -1 105.471 9.12599   6
   4   8   1 94.3181 11.7331   3
   4   8   1 123.560 11.0037   7
  -5  -8  -1 10.5148 3.36628   4
  -5  -8  -1 16.9841 4.65699   2
  -5  -8  -1 12.3661 3.59610   7
  -5  -8  -1 12.5003 3.43808   5
  -5  -8  -1 11.3548 3.30042   5
  -5   8  -1 11.5698 2.49135   6
  -5   8  -1 18.0642 4.48775   1
   5   8   1 15.3305 4.82948   3
  -6  -8  -1 46.4128 6.01971   4
  -6  -8  -1 49.3739 5.92356   5
  -6  -8  -1 45.9820 6.99787   2
  -6  -8  -1 46.9711 5.84455   7
  -6   8  -1 39.9581 6.24989   1
   6   8   1 49.3500 7.97346   3
  -7  -8  -1 2.10957 3.86065   2
  -7  -8  -1 7.97034 2.63817   5
   7   8   1 12.7945 4.93752   3
  -7   8  -1 12.0163 4.16225   1
  -8  -8  -1 7.00846 2.30899   5
  -8  -8  -1 3.82503 3.71707   2
   8   8   1 11.0371 4.93044   3
  -8   8  -1 6.40153 3.72568   1
  -9  -8  -1 -1.5015 3.09317   2
  -9  -8  -1 -0.8940 1.43758   5
  -9  -8  -1 -7.6494 3.39474   6
  -9   8  -1 -1.8696 2.81202   1
  -8  -9   1 38.2384 7.17107   6
  -8  -9   1 21.3026 5.42055   2
  -8  -9   1 32.8652 4.32971   5
   8   9  -1 21.1568 6.05025   3
  -8   9   1 23.0749 5.46838   1
  -7  -9   1 8.31564 2.77527   7
  -7  -9   1 8.63062 2.98460   5
  -7  -9   1 8.58215 4.21051   2
  -7   9   1 8.57740 3.86283   1
   7   9  -1 3.16794 4.78689   3
  -6  -9   1 42.6307 5.76036   5
  -6  -9   1 37.5769 5.60661   7
  -6  -9   1 51.1882 7.08501   2
  -6  -9   1 51.1617 6.24020   4
   6   9  -1 31.3328 6.93390   3
  -6   9   1 36.1188 5.53636   4
  -6   9   1 45.7167 6.67514   1
  -5  -9   1 20.2178 4.33132   5
  -5  -9   1 12.0676 3.86625   4
  -5  -9   1 24.7010 5.46310   2
   5  -9  -1 29.7154 3.93182   4
  -5  -9   1 21.3731 4.62537   7
  -5   9   1 17.8899 4.68163   1
   5   9  -1 29.3498 6.34972   3
  -5   9   1 17.8333 4.24059   4
  -5   9   1 26.9349 3.62243   6
  -4  -9   1 36.0874 5.68336   5
  -4  -9   1 30.8280 6.00402   2
   4  -9  -1 37.7148 6.31746   7
  -4  -9   1 31.7171 6.03343   7
   4  -9  -1 30.7213 5.04286   4
   4  -9  -1 32.4573 5.54649   2
  -4  -9   1 44.0023 5.91023   4
  -4   9   1 43.1557 6.32892   1
  -4   9   1 39.1084 4.49674   6
  -4   9   1 40.1804 6.14252   7
   4   9  -1 47.1502 7.37076   3
  -4   9   1 42.8971 5.96840   4
  -3  -9   1 4.19816 3.08006   4
  -3  -9   1 6.20143 3.21320   5
   3  -9  -1 4.08737 3.14802   4
  -3  -9   1 8.36758 3.53510   2
  -3  -9   1 1.86035 3.40156   7
  -3  -9   1 5.47069 2.98285   5
   3  -9  -1 0.67037 3.05840   7
   3  -9  -1 6.23365 3.14777   2
  -3   9   1 5.87324 1.45086   3
   3   9  -1 4.27456 3.49651   1
  -3   9   1 7.83004 3.68458   1
  -3   9   1 3.86087 2.35987   6
  -3   9   1 5.81272 3.60083   7
  -3   9   1 4.22265 1.16264   3
   3   9  -1 5.40430 3.94061   3
   2  -9  -1 569.041 40.3106   7
   2  -9  -1 618.681 39.2347   2
  -2  -9   1 567.466 39.7063   4
   2  -9  -1 586.453 39.6335   4
  -2  -9   1 579.874 39.8025   5
   2  -9  -1 557.134 39.5553   5
  -2  -9   1 557.077 39.5911   5
  -2  -9   1 555.093 39.3102   2
  -2  -9   1 560.693 40.2474   7
  -2   9   1 557.815 39.9768   7
   2   9  -1 627.854 39.6936   3
   2   9  -1 582.511 39.8347   1
  -2   9   1 563.886 38.3770   6
  -2   9   1 572.482 37.3440   3
  -2   9   1 520.837 39.1922   1
   2   9  -1 591.912 40.0698   7
  -1  -9   1 28.7499 5.15715   2
   1  -9  -1 25.0003 4.59214   2
   1  -9  -1 21.5018 5.07364   4
   1  -9  -1 23.4708 5.19120   5
  -1  -9   1 26.4658 5.25786   5
  -1  -9   1 30.0204 5.85908   7
   1  -9  -1 19.8824 5.25889   7
  -1  -9   1 31.0806 5.31510   5
  -1  -9   1 28.2024 5.32430   4
  -1   9   1 30.8315 4.92821   1
  -1   9   1 25.8636 5.50023   7
   1   9  -1 29.6295 4.64987   3
  -1   9   1 31.3886 4.30304   6
   1   9  -1 21.8228 5.53043   7
   1   9  -1 23.0468 4.79897   1
  -1   9   1 27.8009 3.52532   3
   0  -9   1 33.3938 5.67578   4
   0  -9  -1 39.6650 5.53147   2
   0  -9  -1 28.0504 5.39639   4
   0  -9   1 35.3121 5.72974   5
   0  -9   1 28.4562 6.24729   7
   0  -9  -1 29.2964 6.08510   7
   0  -9  -1 21.1386 4.92137   5
   0  -9   1 25.6779 5.16457   2
   0   9  -1 23.8611 5.55209   7
   0   9   1 40.7497 5.66928   1
   0   9  -1 34.5313 4.28340   3
   0   9   1 24.8867 5.59635   7
   0   9   1 33.1490 4.26669   3
   0   9  -1 39.1784 5.57687   1
   1  -9   1 91.7826 7.87134   2
   1  -9   1 64.6953 8.12109   4
   1  -9   1 79.2521 8.77540   5
   1  -9   1 81.0157 9.64615   7
  -1  -9  -1 77.7653 9.42641   7
  -1  -9  -1 66.6338 8.18172   5
  -1  -9  -1 79.7494 8.61630   4
  -1  -9  -1 73.0116 8.45835   5
  -1  -9  -1 85.9780 8.53419   2
   1   9   1 63.2188 7.73574   1
  -1   9  -1 59.9777 8.46603   7
  -1   9  -1 72.1263 5.64087   3
   1   9   1 66.4642 8.69335   7
   1   9   1 64.9451 7.40999   3
  -1   9  -1 64.7940 7.83230   1
   2  -9   1 423.216 30.5529   5
  -2  -9  -1 442.856 30.7600   5
   2  -9   1 433.994 30.0325   2
  -2  -9  -1 415.792 30.3723   5
  -2  -9  -1 445.135 30.3610   2
  -2  -9  -1 416.493 30.8803   7
  -2  -9  -1 436.832 30.4805   4
   2  -9   1 424.774 30.1937   4
   2  -9   1 411.857 31.0085   7
  -2   9  -1 427.029 28.9249   6
  -2   9  -1 424.300 30.1550   1
   2   9   1 449.325 30.8314   7
   2   9   1 420.447 30.3857   1
   2   9   1 423.721 30.1454   3
  -3  -9  -1 31.4722 5.55737   7
  -3  -9  -1 22.7764 4.38664   5
  -3  -9  -1 20.9132 4.89346   2
   3  -9   1 23.4936 4.55051   4
  -3  -9  -1 17.6107 4.39477   4
  -3  -9  -1 31.1333 4.97339   5
   3  -9   1 29.7573 6.15086   7
   3  -9   1 20.0065 4.14533   2
   3   9   1 16.9555 4.57733   1
   3   9   1 24.9146 5.40171   3
   3   9   1 19.3227 4.89466   7
  -3   9  -1 16.4479 2.95496   6
  -3   9  -1 25.3310 4.89333   1
   4  -9   1 52.8388 6.21956   4
   4  -9   1 53.5460 7.84768   7
  -4  -9  -1 41.5115 7.07651   7
  -4  -9  -1 57.7643 7.63626   4
   4  -9   1 66.8834 7.60391   2
  -4  -9  -1 46.4561 7.44717   2
  -4  -9  -1 48.1950 6.80597   5
   4   9   1 65.1041 8.71594   3
  -4   9  -1 81.5671 8.22231   1
   4   9   1 74.1234 7.78401   7
  -4   9  -1 65.2409 5.34096   6
  -5  -9  -1 13.5535 3.82745   7
  -5  -9  -1 9.52197 3.49541   4
  -5  -9  -1 5.63133 3.22163   5
  -5  -9  -1 5.73769 3.98440   2
  -5   9  -1 11.6236 4.06303   1
   5   9   1 8.18350 4.54131   3
  -6  -9  -1 52.2295 6.43798   4
  -6  -9  -1 46.0333 7.16244   2
  -6  -9  -1 49.2307 6.15738   5
  -6  -9  -1 42.2165 5.94416   7
  -6   9  -1 65.8346 7.60317   1
   6   9   1 33.0727 7.24462   3
  -7  -9  -1 33.3286 4.77594   5
  -7  -9  -1 34.7970 4.57091   7
  -7  -9  -1 34.9483 6.46568   2
   7   9   1 27.8430 6.42628   3
  -7   9  -1 34.2496 6.00110   1
  -8  -9  -1 40.5496 6.90139   2
  -8  -9  -1 33.3679 4.46111   5
   8   9   1 38.8934 7.50232   3
  -8   9  -1 46.7794 6.49992   1
  -8 -10   1 5.48682 3.94770   2
  -8 -10   1 -0.1334 2.54204   5
   8  10  -1 0.31405 4.38700   3
  -8  10   1 -1.1962 3.22374   1
  -7 -10   1 2.83470 2.87488   7
  -7 -10   1 4.72605 3.85327   2
  -7 -10   1 3.82890 2.69018   5
   7  10  -1 3.15990 4.05898   3
  -7  10   1 7.02025 3.76946   1
  -6 -10   1 39.6221 6.02005   7
  -6 -10   1 30.9153 6.31147   2
  -6 -10   1 46.9453 6.11853   5
  -6 -10   1 43.6158 6.22035   4
   6  10  -1 53.2341 8.37742   3
  -6  10   1 47.2403 6.86132   1
  -5 -10   1 7.94396 4.07539   2
   5 -10  -1 1.68547 3.66454   4
  -5 -10   1 7.78677 3.78138   7
  -5 -10   1 6.05367 3.39784   4
  -5 -10   1 3.89110 3.10056   5
   5  10  -1 3.18908 4.05202   3
  -5  10   1 6.34706 3.83541   1
   4 -10  -1 103.431 9.56790   4
  -4 -10   1 103.460 10.3897   5
  -4 -10   1 102.657 9.95885   4
   4 -10  -1 104.757 9.80996   2
   4 -10  -1 101.386 11.5492   7
  -4 -10   1 97.6072 10.8677   2
  -4 -10   1 119.410 10.7591   7
  -4  10   1 99.3240 8.52124   6
  -4  10   1 119.634 10.2658   1
  -4  10   1 117.443 10.4889   7
   4  10  -1 123.598 12.3982   3
  -3 -10   1 13.7072 4.45999   7
   3 -10  -1 14.9318 4.03861   2
  -3 -10   1 9.84766 4.21399   5
  -3 -10   1 11.4997 3.89408   2
   3 -10  -1 8.89461 3.59308   4
  -3 -10   1 8.26649 3.93251   4
   3 -10  -1 6.07201 4.09537   7
  -3  10   1 14.0853 2.97378   6
   3  10  -1 14.4013 4.48450   1
  -3  10   1 15.9598 4.19167   1
   3  10  -1 12.6532 4.53258   3
  -3  10   1 12.3858 4.42821   7
  -2 -10   1 17.0275 4.55489   5
  -2 -10   1 13.5262 4.35305   5
  -2 -10   1 10.4274 4.20857   2
   2 -10  -1 13.0788 4.20576   5
   2 -10  -1 9.71992 4.46002   7
  -2 -10   1 18.0319 4.49615   4
  -2 -10   1 11.4670 4.46394   7
   2 -10  -1 10.9046 3.98275   4
   2 -10  -1 19.4925 4.06569   2
  -2  10   1 14.0354 4.58873   7
  -2  10   1 23.5385 4.79582   1
  -2  10   1 15.1750 3.34859   6
   2  10  -1 18.1466 4.91133   1
  -2  10   1 17.7228 2.18546   3
   2  10  -1 20.6806 4.38665   3
   1 -10  -1 4.74300 3.24379   5
   1 -10  -1 6.12472 4.26342   7
  -1 -10   1 12.8860 4.03280   4
  -1 -10   1 7.25391 3.83020   5
   1 -10  -1 3.64672 3.07974   2
  -1 -10   1 6.25606 4.18655   7
  -1 -10   1 5.02731 3.40273   2
   1 -10  -1 6.35936 3.67147   4
   1  10  -1 7.94180 3.06026   3
  -1  10   1 0.42437 2.69063   6
  -1  10   1 4.77645 3.40795   1
   1  10  -1 5.93480 3.71548   7
   1  10  -1 4.29972 2.71569   1
  -1  10   1 6.10033 3.96297   7
  -1  10   1 3.39674 1.82417   3
   0 -10   1 4.46779 3.37816   4
   0 -10   1 7.98743 4.14947   7
   0 -10   1 4.80009 3.38676   5
   0 -10  -1 3.46080 3.41342   2
   0 -10  -1 8.34302 3.79111   4
   0 -10  -1 4.48316 4.06507   7
   0 -10  -1 5.47367 3.49866   5
   0 -10   1 1.21520 3.22473   2
   0  10  -1 2.64682 3.16721   1
   0  10   1 5.70519 3.48727   1
   0  10   1 4.00861 2.56295   3
   0  10   1 9.79569 3.91220   7
   0  10  -1 3.53242 2.26911   3
   0  10  -1 4.78751 3.85211   7
  -1 -10  -1 47.3369 7.43026   5
   1 -10   1 56.2706 7.47866   4
   1 -10   1 54.8536 7.59645   5
   1 -10   1 66.3911 9.18844   7
   1 -10   1 61.0904 7.28779   2
  -1 -10  -1 64.9178 7.88736   4
  -1 -10  -1 64.8457 7.75800   2
  -1 -10  -1 62.6393 8.90894   7
   1  10   1 63.6044 7.04444   3
  -1  10  -1 48.8533 7.53039   7
   1  10   1 53.0763 6.99930   1
   1  10   1 68.2151 8.44421   7
  -1  10  -1 60.7032 4.95159   3
  -1  10  -1 62.9486 7.33427   1
   2 -10   1 220.969 16.2559   4
   2 -10   1 219.715 15.8990   2
  -2 -10  -1 191.370 15.9992   5
  -2 -10  -1 213.302 17.2256   7
  -2 -10  -1 212.594 16.1638   2
   2 -10   1 200.720 16.2493   5
  -2 -10  -1 218.185 16.6231   5
  -2 -10  -1 219.789 16.5263   4
   2 -10   1 236.398 17.7212   7
  -2  10  -1 196.633 14.6759   6
   2  10   1 190.453 15.7191   3
   2  10   1 196.385 16.4513   7
  -2  10  -1 164.294 15.3879   1
   2  10   1 193.553 16.0142   1
  -3 -10  -1 12.8053 4.49092   4
  -3 -10  -1 12.0542 4.13905   2
   3 -10   1 9.54924 4.23414   7
  -3 -10  -1 7.28391 3.52665   5
   3 -10   1 5.87805 3.27377   2
  -3 -10  -1 5.05273 3.65639   7
   3 -10   1 6.38741 3.28647   4
   3  10   1 14.9634 4.57789   3
  -3  10  -1 11.5781 3.90879   1
  -3  10  -1 15.3932 2.80436   6
   3  10   1 17.0198 4.60142   1
   3  10   1 10.9495 4.13482   7
  -4 -10  -1 22.1372 4.75968   5
  -4 -10  -1 21.0144 4.61794   4
   4 -10   1 24.1541 5.49652   7
   4 -10   1 19.0993 4.45715   2
   4 -10   1 18.1169 4.03438   4
  -4 -10  -1 32.9989 5.81098   2
  -4 -10  -1 19.4249 4.74651   7
   4  10   1 19.3867 4.71957   7
  -4  10  -1 24.4718 4.93783   1
   4  10   1 18.4709 5.28547   3
  -4  10  -1 16.2247 2.93308   6
  -5 -10  -1 16.1616 4.31539   7
  -5 -10  -1 6.26326 4.16857   2
  -5 -10  -1 10.2773 3.97390   4
  -5 -10  -1 12.8599 3.86147   5
   5  10   1 9.93073 4.56897   3
  -5  10  -1 13.9129 4.26656   1
  -6 -10  -1 55.0511 6.91092   5
  -6 -10  -1 51.7832 6.86500   4
  -6 -10  -1 51.1151 6.97136   7
  -6 -10  -1 54.7228 7.69929   2
  -6  10  -1 74.2369 8.22740   1
   6  10   1 63.4482 9.09112   3
  -7 -10  -1 2.04926 2.69537   5
  -7 -10  -1 3.34506 2.81897   7
  -7 -10  -1 -1.9918 3.33587   2
   7  10   1 5.68120 4.59197   3
  -7  10  -1 0.82127 3.40801   1
  -8 -10  -1 6.89383 2.83820   5
  -8 -10  -1 4.89764 3.91384   2
   8  10   1 4.32783 4.35003   3
  -8  10  -1 4.52648 4.03452   1
  -8 -11   1 22.2990 4.09240   5
  -8 -11   1 20.1890 5.28013   2
   8  11  -1 18.7047 5.90891   3
  -8  11   1 25.4697 5.38333   1
  -7 -11   1 0.16250 2.87382   7
  -7 -11   1 1.78303 3.86934   2
  -7 -11   1 -0.4256 2.49390   5
   7  11  -1 1.59884 4.50310   3
  -7  11   1 0.48408 3.39011   1
  -6 -11   1 22.0864 4.47732   5
  -6 -11   1 14.7900 4.27168   4
  -6 -11   1 24.4866 5.33955   2
  -6 -11   1 26.1882 5.05999   7
  -6  11   1 7.73883 4.25038   1
   6  11  -1 6.32358 4.74480   3
  -5 -11   1 16.4603 4.57536   4
  -5 -11   1 21.5791 5.47380   2
  -5 -11   1 27.8351 4.99145   5
  -5 -11   1 26.2940 5.39577   7
   5  11  -1 22.6828 5.74885   3
  -5  11   1 21.9862 5.04501   1
  -4 -11   1 169.456 15.6532   5
  -4 -11   1 193.589 15.8596   2
  -4 -11   1 197.955 16.6083   7
  -4 -11   1 190.709 15.8982   4
   4 -11  -1 187.370 15.3053   2
   4 -11  -1 212.166 15.4200   4
   4 -11  -1 211.107 16.8467   7
  -4  11   1 196.482 15.7436   1
  -4  11   1 196.042 14.1418   6
   4  11  -1 210.236 16.6887   3
   3 -11  -1 12.2278 3.64295   2
  -3 -11   1 16.6187 4.52451   5
   3 -11  -1 13.9220 4.89436   7
  -3 -11   1 13.2781 4.46305   4
  -3 -11   1 14.1242 4.37836   2
   3 -11  -1 15.2749 4.35299   4
  -3 -11   1 15.2548 5.09243   7
  -3  11   1 9.64752 4.32569   7
   3  11  -1 15.2886 4.84800   1
  -3  11   1 15.4922 4.52418   1
   3  11  -1 24.1858 5.28668   3
  -3  11   1 13.7480 3.17520   6
  -2 -11   1 302.450 23.4699   2
  -2 -11   1 300.930 24.3464   7
   2 -11  -1 326.786 22.9524   2
   2 -11  -1 322.975 23.6891   4
  -2 -11   1 337.514 24.1796   5
  -2 -11   1 338.336 23.8640   4
   2 -11  -1 326.233 23.7596   5
   2 -11  -1 324.207 24.6396   7
   2  11  -1 313.321 23.1852   3
  -2  11   1 325.187 22.4927   6
  -2  11   1 326.075 21.1588   3
  -2  11   1 278.911 23.0114   1
  -2  11   1 317.997 24.2534   7
   2  11  -1 311.799 23.7988   1
  -1 -11   1 29.3837 5.44637   2
   1 -11  -1 45.5710 6.30256   4
   1 -11  -1 29.6937 5.21034   2
  -1 -11   1 20.6667 5.69806   7
  -1 -11   1 31.7987 5.80965   5
  -1 -11   1 20.2751 5.19785   4
   1 -11  -1 22.3553 5.27076   5
   1 -11  -1 31.0360 6.38866   7
   1  11  -1 30.6096 5.70800   1
   1  11  -1 25.1424 5.92811   7
   1  11  -1 26.9782 4.67966   3
  -1  11   1 30.8579 5.98805   7
  -1  11   1 19.7249 4.85179   1
  -1  11   1 33.3672 3.81555   3
   0 -11   1 41.2788 6.37253   2
   0 -11   1 46.1877 6.92758   4
   0 -11   1 49.6134 8.13467   7
   0 -11  -1 50.7617 7.46088   4
   0 -11   1 64.0278 7.98021   5
   0 -11  -1 47.7634 6.74221   2
   0 -11  -1 40.8355 7.70001   7
   0 -11  -1 43.7261 6.95387   5
   0  11   1 46.1497 7.44967   7
   0  11  -1 40.9864 6.54185   1
   0  11  -1 60.3615 5.93397   3
   0  11   1 46.0638 5.68748   3
   0  11   1 55.9774 7.07722   1
   0  11  -1 50.1514 7.55695   7
  -1 -11  -1 109.426 11.5314   4
   1 -11   1 115.667 10.5762   4
  -1 -11  -1 108.702 10.1785   2
  -1 -11  -1 110.151 11.3435   5
   1 -11   1 97.4552 11.7682   7
   1 -11   1 126.881 11.0170   5
  -1 -11  -1 110.332 12.1702   7
   1 -11   1 121.367 10.6462   2
   1  11   1 106.281 9.56905   3
   1  11   1 105.701 11.5374   7
  -1  11  -1 104.594 9.89179   1
  -1  11  -1 97.9486 7.88369   3
   1  11   1 105.904 9.91382   1
  -1  11  -1 104.723 11.6570   7
  -2 -11  -1 227.150 18.2933   5
   2 -11   1 251.469 18.6101   5
  -2 -11  -1 234.142 19.0102   7
   2 -11   1 243.382 17.9889   2
  -2 -11  -1 225.311 17.9534   2
   2 -11   1 236.058 18.0709   4
   2 -11   1 222.301 18.9296   7
  -2 -11  -1 229.094 18.4762   4
   2  11   1 205.006 17.8696   1
   2  11   1 244.712 18.0066   3
  -2  11  -1 240.896 17.9722   1
   2  11   1 234.463 18.8082   7
  -3 -11  -1 11.2669 4.47371   7
  -3 -11  -1 16.4873 4.26723   2
   3 -11   1 18.1703 4.40446   2
  -3 -11  -1 13.0403 4.22313   5
  -3 -11  -1 11.5909 4.12681   4
   3 -11   1 14.8876 4.26361   4
   3 -11   1 23.9674 5.68801   7
   3  11   1 8.14894 4.10160   3
   3  11   1 5.84679 3.89414   7
  -3  11  -1 8.65321 4.03026   1
  -3  11  -1 8.78912 2.63886   6
   3  11   1 9.94810 4.18337   1
  -4 -11  -1 178.414 14.7243   5
  -4 -11  -1 173.268 14.5867   2
  -4 -11  -1 177.014 14.6524   4
   4 -11   1 168.260 14.3258   2
   4 -11   1 186.659 13.9104   4
   4 -11   1 169.423 15.1633   7
  -4 -11  -1 173.560 15.3277   7
   4  11   1 189.673 15.4760   3
  -4  11  -1 160.397 14.1230   1
  -5 -11  -1 19.1562 4.60910   5
  -5 -11  -1 27.3933 5.68999   7
  -5 -11  -1 25.1347 4.85735   4
  -5 -11  -1 16.9885 5.13094   2
  -5  11  -1 17.4400 4.77366   1
   5  11   1 18.5049 5.52187   3
  -6 -11  -1 8.00692 3.61121   7
  -6 -11  -1 6.26245 3.44241   4
  -6 -11  -1 9.46091 4.25763   2
  -6 -11  -1 12.1441 3.66916   5
  -6  11  -1 7.76892 3.87544   1
   6  11   1 10.4298 4.94166   3
  -7 -11  -1 2.23731 3.67197   2
  -7 -11  -1 6.23608 3.12060   5
  -7 -11  -1 3.09521 3.13015   7
  -7  11  -1 -4.3079 3.55338   1
   7  11   1 5.41379 4.96249   3
  -8 -11  -1 4.39531 2.53188   5
  -8 -11  -1 -0.1625 3.62902   2
   8  11   1 2.08307 4.80733   3
  -8  11  -1 -2.4215 3.36102   1
  -7 -12   1 8.36832 3.66159   7
  -7 -12   1 8.12044 3.32297   5
  -7 -12   1 6.75605 4.36546   2
   7  12  -1 11.4043 5.06165   3
  -7  12   1 2.94530 3.82683   1
  -6 -12   1 25.2596 5.38651   7
  -6 -12   1 29.2854 5.88376   2
  -6 -12   1 29.7879 5.43277   4
  -6 -12   1 29.7231 5.24285   5
  -6  12   1 22.2334 5.27228   1
   6  12  -1 21.6385 5.98181   3
  -5 -12   1 7.01037 3.82164   5
   5 -12  -1 13.3653 4.07695   2
  -5 -12   1 12.5623 4.49632   2
  -5 -12   1 15.2990 4.53588   4
  -5 -12   1 9.33607 4.25690   7
   5  12  -1 5.02395 4.78798   3
  -5  12   1 12.8870 4.42363   1
  -4 -12   1 60.3197 7.70866   5
   4 -12  -1 66.1627 8.83775   7
  -4 -12   1 60.8948 7.69724   4
  -4 -12   1 70.3660 8.14745   2
  -4 -12   1 39.6005 7.40453   7
   4 -12  -1 62.0128 7.18146   2
   4 -12  -1 59.4074 7.13571   4
   4  12  -1 39.8686 7.30614   3
  -4  12   1 40.3118 7.01777   1
  -3 -12   1 8.50122 4.03825   4
   3 -12  -1 4.28803 3.35322   4
  -3 -12   1 4.91300 3.52295   5
  -3 -12   1 4.57941 3.97047   7
   3 -12  -1 1.27592 3.67252   7
  -3 -12   1 3.90984 3.54476   2
   3 -12  -1 4.65787 3.31691   2
  -3  12   1 1.76322 2.45273   6
  -3  12   1 7.79232 4.05985   1
   3  12  -1 3.65678 3.87268   1
   3  12  -1 12.3421 4.40545   3
  -3  12   1 -0.1757 3.33660   7
  -2 -12   1 57.5318 7.73737   4
  -2 -12   1 57.8216 7.60508   2
   2 -12  -1 53.3537 6.62841   2
   2 -12  -1 51.1361 8.30156   7
   2 -12  -1 50.6043 7.46678   4
  -2 -12   1 45.1598 7.32392   5
  -2 -12   1 41.2371 7.53788   7
   2  12  -1 45.7232 6.62208   3
  -2  12   1 42.0969 5.64806   6
  -2  12   1 60.3519 7.49079   1
  -2  12   1 40.7717 7.24548   7
   2  12  -1 53.3225 7.56214   1
  -1 -12   1 39.4161 6.72424   4
   1 -12  -1 38.3124 7.18067   7
  -1 -12   1 30.8539 5.70937   2
  -1 -12   1 29.3407 6.05447   5
  -1 -12   1 31.9314 6.81340   7
   1 -12  -1 31.0249 5.36534   2
   1 -12  -1 30.6159 6.07507   4
   1 -12  -1 27.0021 5.74808   5
   1  12  -1 37.7534 5.42202   3
  -1  12   1 35.3483 6.74903   7
   1  12  -1 33.4765 6.19495   1
  -1  12   1 48.8204 4.70643   3
  -1  12   1 42.7863 6.30956   1
   0 -12  -1 4.60164 3.70972   2
   0 -12   1 5.03232 3.80611   4
   0 -12  -1 2.77072 3.63942   5
   0 -12   1 4.45179 4.11248   7
   0 -12  -1 5.17872 3.88930   4
   0 -12  -1 7.02786 4.60092   7
   0 -12   1 1.39364 3.36615   2
   0 -12   1 3.20381 3.76624   5
   0  12  -1 4.76459 3.58683   1
   0  12   1 9.52361 3.09302   3
   0  12  -1 2.96879 2.54111   3
   0  12   1 3.18420 4.17630   7
   0  12   1 5.91878 3.69358   1
   1 -12   1 35.1054 6.31400   4
  -1 -12  -1 30.4220 6.79343   7
   1 -12   1 40.1646 6.33538   2
  -1 -12  -1 30.2902 5.74822   2
  -1 -12  -1 33.0748 6.26283   4
   1 -12   1 43.6059 7.82491   7
   1 -12   1 50.3128 7.03943   5
  -1 -12  -1 32.3145 6.18203   5
   1  12   1 39.7577 6.96847   7
   1  12   1 33.2992 6.01072   1
  -1  12  -1 31.8603 5.91587   1
   1  12   1 43.2569 5.82415   3
  -2 -12  -1 28.7256 5.68923   2
  -2 -12  -1 22.4154 5.55260   5
   2 -12   1 39.7652 5.98971   2
   2 -12   1 17.9296 5.08347   4
  -2 -12  -1 25.6691 5.96743   4
  -2 -12  -1 29.0346 6.30533   7
   2 -12   1 21.3223 6.69358   7
   2  12   1 47.0186 7.04204   7
  -2  12  -1 36.4104 6.00032   1
   2  12   1 43.0777 6.19890   3
   2  12   1 46.0903 6.63883   1
  -3 -12  -1 11.4674 4.25481   5
   3 -12   1 10.5424 4.00311   2
   3 -12   1 15.5075 4.47421   4
  -3 -12  -1 11.6563 4.21126   4
   3 -12   1 14.4971 5.50236   7
  -3 -12  -1 15.2892 5.24349   7
  -3 -12  -1 7.97189 4.13108   2
   3  12   1 14.4947 4.58779   7
   3  12   1 8.39470 4.35770   3
  -3  12  -1 22.5916 5.21768   1
  -3  12  -1 16.1192 3.19796   6
   3  12   1 17.6181 4.98585   1
   4 -12   1 12.2065 4.68871   7
  -4 -12  -1 17.0164 4.58425   5
  -4 -12  -1 24.0534 5.15156   4
   4 -12   1 25.1896 4.62588   4
  -4 -12  -1 11.7938 4.96816   7
  -4 -12  -1 19.7082 4.90508   2
   4 -12   1 11.2994 4.15819   2
   4  12   1 10.5720 4.44329   3
  -4  12  -1 13.0000 4.54432   1
  -5 -12  -1 18.8883 4.62125   5
  -5 -12  -1 11.9030 3.98608   4
  -5 -12  -1 21.4664 5.20063   2
  -5 -12  -1 11.9762 4.79580   7
   5 -12   1 20.6593 4.78620   2
  -5  12  -1 25.8977 5.46313   1
   5  12   1 18.2222 5.80984   3
  -6 -12  -1 9.27904 4.61600   2
  -6 -12  -1 10.7425 3.79774   5
  -6 -12  -1 6.76019 4.04232   7
  -6 -12  -1 4.33229 3.41229   4
  -6  12  -1 3.03619 3.68929   1
   6  12   1 10.1193 5.01066   3
  -7 -12  -1 2.54613 3.08328   5
  -7 -12  -1 11.8796 3.60764   7
  -7 -12  -1 15.1654 4.80861   2
  -7  12  -1 2.44094 3.57466   1
   7  12   1 13.8342 5.44345   3
  -7 -13   1 3.40233 3.89043   2
  -7 -13   1 4.59804 3.63395   7
  -7 -13   1 10.0794 3.71829   5
  -7  13   1 2.51896 4.18310   1
   7  13  -1 1.33542 4.27992   3
  -6 -13   1 -2.5228 3.59493   2
  -6 -13   1 1.86927 3.11956   5
  -6 -13   1 1.42369 3.61981   4
  -6 -13   1 3.49251 3.63217   7
  -6  13   1 1.04113 3.60245   1
   6  13  -1 0.89124 4.18354   3
  -5 -13   1 36.6133 6.57522   7
  -5 -13   1 52.2669 7.01330   5
   5 -13  -1 46.6509 6.30932   2
  -5 -13   1 36.9951 6.21398   4
  -5 -13   1 32.4285 6.44335   2
  -5  13   1 45.3361 6.78682   1
   5  13  -1 31.6169 6.65039   3
  -4 -13   1 40.8394 6.88774   4
  -4 -13   1 45.0278 7.71230   7
   4 -13  -1 45.5444 7.69436   7
  -4 -13   1 40.0659 6.74081   2
  -4 -13   1 54.3100 7.38324   5
   4 -13  -1 47.4561 6.75379   2
   4 -13  -1 47.0706 6.54921   4
   4  13  -1 54.8061 7.86462   3
  -4  13   1 40.3932 7.07137   1
   3 -13  -1 74.0688 9.87357   7
  -3 -13   1 82.3231 9.18659   2
  -3 -13   1 59.6506 8.50496   4
  -3 -13   1 59.4042 8.99374   7
   3 -13  -1 61.8771 8.11386   2
  -3 -13   1 69.3984 8.98711   5
   3 -13  -1 72.2800 8.47667   4
   3  13  -1 66.3113 8.52379   3
  -3  13   1 72.3758 8.63799   1
   3  13  -1 62.2195 8.80536   1
  -3  13   1 78.5350 6.86986   6
  -2 -13   1 112.179 12.3168   7
  -2 -13   1 103.714 11.1427   4
   2 -13  -1 103.445 12.3875   7
  -2 -13   1 94.9001 11.1980   5
   2 -13  -1 83.2633 9.72002   2
   2 -13  -1 107.782 10.2731   4
  -2 -13   1 100.789 10.8749   2
  -2  13   1 97.6516 10.8032   1
  -2  13   1 140.174 11.8683   7
   2  13  -1 97.3159 9.74985   3
   2  13  -1 110.567 11.8300   1
  -1 -13   1 10.6982 4.63325   5
  -1 -13   1 26.7653 5.54412   2
  -1 -13   1 13.1478 5.32718   7
   1 -13  -1 23.4162 5.06571   2
   1 -13  -1 22.6633 5.38017   4
   1 -13  -1 14.1748 5.17121   7
  -1 -13   1 14.0745 4.66826   4
  -1  13   1 10.5096 4.82979   7
   1  13  -1 20.7791 4.24251   3
  -1  13   1 18.7455 4.75187   1
   1  13  -1 21.2792 5.07550   1
   0 -13   1 56.4561 7.81622   2
   0 -13  -1 59.4069 7.99075   2
   0 -13  -1 75.0936 10.0319   7
   0 -13   1 88.5558 9.92802   4
   0 -13   1 58.0799 9.26626   7
   0 -13  -1 57.9154 8.51708   4
   0 -13  -1 65.6636 8.66845   5
   0 -13   1 69.8382 8.94886   5
   0  13   1 70.1229 8.58300   1
   0  13   1 77.5912 9.68941   7
   0  13  -1 73.4136 8.49295   3
   0  13  -1 63.9980 8.22065   1
   0  13   1 66.8529 6.91442   3
  -1 -13  -1 55.3645 7.82211   2
  -1 -13  -1 62.3744 8.33961   5
  -1 -13  -1 61.7753 9.25879   7
   1 -13   1 42.2393 8.11804   7
   1 -13   1 52.4128 7.37835   2
   1 -13   1 51.7940 8.09391   4
  -1 -13  -1 81.5722 9.26579   4
   1  13   1 59.3963 8.58333   7
  -1  13  -1 59.6319 7.77824   1
   1  13   1 71.8269 7.41552   3
   1  13   1 49.6751 7.55297   1
   2 -13   1 84.0001 10.9602   7
  -2 -13  -1 85.0242 11.0023   7
  -2 -13  -1 66.6826 9.17103   4
  -2 -13  -1 85.5594 10.0175   5
   2 -13   1 63.2992 8.77536   4
  -2 -13  -1 61.7605 8.66438   2
   2 -13   1 77.2595 8.94877   2
   2  13   1 91.0991 9.97746   1
   2  13   1 93.0243 9.52866   3
  -2  13  -1 99.7868 9.10294   1
   2  13   1 88.5550 10.3719   7
  -3 -13  -1 44.8163 7.13913   4
   3 -13   1 48.7745 7.93058   7
  -3 -13  -1 46.3055 6.83086   5
   3 -13   1 36.4789 6.15732   4
  -3 -13  -1 38.7841 6.55979   2
   3 -13   1 29.7456 5.68381   2
  -3 -13  -1 64.6726 8.50045   7
   3  13   1 33.2298 5.95616   3
   3  13   1 29.4460 6.35072   1
  -3  13  -1 30.9452 5.93098   1
   4 -13   1 31.2048 5.69839   2
   4 -13   1 36.2558 6.81277   7
  -4 -13  -1 23.6475 5.58161   4
   4 -13   1 27.7011 5.14249   4
  -4 -13  -1 25.6970 5.64548   5
  -4 -13  -1 25.7298 6.10485   7
  -4 -13  -1 31.7207 6.10781   2
  -4  13  -1 27.7792 5.66268   1
   4  13   1 33.2013 6.55665   3
  -5 -13  -1 6.31055 3.77376   4
  -5 -13  -1 13.7261 4.66918   7
  -5 -13  -1 13.8274 4.21529   5
  -5 -13  -1 12.8244 4.42811   2
   5 -13   1 16.6972 4.63285   2
  -5  13  -1 18.3409 5.22961   1
   5  13   1 18.9473 5.40868   3
  -6 -13  -1 6.13967 4.54966   2
  -6 -13  -1 7.72616 3.92022   4
  -6 -13  -1 7.83556 3.60482   5
  -6 -13  -1 9.49315 4.02966   7
   6  13   1 7.45016 4.84912   3
  -6  13  -1 9.65209 4.18612   1
  -7 -13  -1 1.99236 3.16589   5
  -7 -13  -1 0.26909 3.34244   7
  -7 -13  -1 -0.8096 3.40134   2
   7  13   1 0.61131 4.52498   3
  -7  13  -1 -0.0950 3.74737   1
  -6 -14   1 15.7471 4.53926   5
  -6 -14   1 12.8559 4.36121   7
  -6 -14   1 7.81680 4.39712   2
  -6 -14   1 15.8352 4.61695   4
   6  14  -1 21.3110 5.83863   3
  -6  14   1 5.10386 4.19921   1
  -5 -14   1 6.48370 3.92772   5
  -5 -14   1 9.05378 4.02285   4
  -5 -14   1 2.48695 3.71961   7
  -5 -14   1 0.17791 3.50279   2
   5 -14  -1 -0.5121 2.58676   2
   5  14  -1 3.01895 4.58070   3
  -5  14   1 -0.8365 3.92370   1
  -4 -14   1 13.4144 4.88357   5
   4 -14  -1 7.97734 3.84621   4
  -4 -14   1 16.3705 5.28305   7
  -4 -14   1 15.0623 5.14917   4
   4 -14  -1 12.5326 4.21743   2
  -4 -14   1 12.0362 4.70584   2
  -4  14   1 13.2237 4.89408   1
   4  14  -1 20.4210 5.52796   3
  -3 -14   1 9.95754 4.67881   2
   3 -14  -1 4.16346 3.71436   2
  -3 -14   1 6.14448 4.39287   7
   3 -14  -1 7.19659 4.52980   7
  -3 -14   1 2.83064 3.84466   4
   3 -14  -1 8.27713 3.82851   4
  -3 -14   1 5.04977 3.88009   5
   3  14  -1 4.22702 3.77777   3
  -3  14   1 3.27955 3.80735   1
   3  14  -1 0.59201 3.65937   1
   2 -14  -1 11.2524 4.75802   2
  -2 -14   1 17.1773 5.74281   7
   2 -14  -1 14.1493 5.34087   4
  -2 -14   1 12.1949 4.72144   5
  -2 -14   1 13.6164 4.70844   2
   2 -14  -1 28.9653 6.76193   7
  -2 -14   1 13.7964 4.65765   4
   2  14  -1 18.1243 5.45643   1
  -2  14   1 13.1611 4.85840   7
   2  14  -1 18.9887 4.63341   3
  -2  14   1 16.2036 4.84369   1
   1 -14  -1 21.4726 5.36966   4
   1 -14  -1 13.8121 4.27270   2
  -1 -14   1 9.91365 4.88713   2
  -1 -14   1 19.9834 5.94121   7
  -1 -14   1 19.8825 5.12633   4
   1 -14  -1 23.9097 6.94517   7
  -1 -14   1 17.5478 5.19280   5
   1  14  -1 13.3197 4.25216   3
  -1  14   1 21.1473 5.55078   7
  -1  14   1 8.80462 4.27041   1
   1  14  -1 16.7440 5.07025   1
   0 -14   1 82.5601 10.1885   5
   0 -14  -1 85.0304 11.2140   7
   0 -14   1 76.1006 9.82776   4
   0 -14  -1 83.0237 10.0409   5
   0 -14   1 87.0990 11.0923   7
   0 -14  -1 76.0549 9.17365   2
   0 -14  -1 71.8479 9.51605   4
   0 -14   1 93.6795 10.0221   2
   0  14  -1 88.3066 9.80416   1
   0  14   1 94.0625 11.1960   7
   0  14   1 77.5946 9.37804   1
  -1 -14  -1 1.19725 3.58872   2
  -1 -14  -1 1.56071 3.64489   5
   1 -14   1 2.35977 3.53472   2
   1 -14   1 -3.8371 3.80290   4
  -1 -14  -1 -2.3768 3.15759   4
  -1 -14  -1 5.67483 4.73449   7
   1 -14   1 3.47265 4.30582   7
   1  14   1 1.89170 4.11478   7
  -1  14  -1 2.01430 3.68525   1
   1  14   1 5.43046 3.41772   3
   1  14   1 4.60358 3.73728   1
   2 -14   1 78.5579 9.26551   2
  -2 -14  -1 84.0555 9.84856   5
  -2 -14  -1 74.3289 10.1692   7
   2 -14   1 64.5017 9.10389   4
  -2 -14  -1 77.4024 9.52014   4
  -2 -14  -1 80.7870 9.34794   2
   2 -14   1 84.2546 10.6508   7
   2  14   1 69.8497 9.35755   1
   2  14   1 80.2098 8.83480   3
  -2  14  -1 74.4236 8.92745   1
   2  14   1 72.3585 9.60826   7
  -3 -14  -1 10.3795 4.54783   4
  -3 -14  -1 5.29942 3.86783   2
  -3 -14  -1 8.45741 4.21513   5
  -3 -14  -1 5.78071 4.58300   7
   3 -14   1 -0.8872 2.94763   2
   3 -14   1 6.51387 3.94081   4
   3 -14   1 6.27815 4.60339   7
  -3  14  -1 11.6680 4.34087   1
   3  14   1 11.3493 4.46324   3
   3  14   1 12.0825 4.65707   1
  -4 -14  -1 112.875 12.0996   4
  -4 -14  -1 107.034 10.8400   2
  -4 -14  -1 117.706 12.8839   7
   4 -14   1 122.794 11.1099   2
  -4 -14  -1 118.144 11.5476   5
   4 -14   1 114.202 10.8577   4
  -4  14  -1 139.634 11.5109   1
   4  14   1 107.123 12.1406   3
   5 -14   1 -1.2045 2.95039   2
  -5 -14  -1 1.49034 3.78994   7
  -5 -14  -1 -0.3259 3.26986   5
  -5 -14  -1 3.37069 3.85288   2
  -5 -14  -1 6.26790 3.95924   4
   5  14   1 5.79175 4.45106   3
  -5  14  -1 2.60548 4.34638   1
  -6 -14  -1 6.42322 4.31484   2
  -6 -14  -1 2.52427 3.25480   5
  -6 -14  -1 2.48026 3.61674   7
  -6 -14  -1 4.53410 3.67675   4
  -6  14  -1 0.82669 3.62203   1
   6  14   1 -3.5885 4.16713   3
  -6 -15   1 0.43391 3.09386   5
  -6 -15   1 4.67014 4.04749   4
  -6 -15   1 4.38143 3.98845   7
  -6 -15   1 -2.9394 3.69396   2
  -6  15   1 -1.7811 3.67882   1
   6  15  -1 -1.4383 3.60077   3
  -5 -15   1 7.65491 4.17571   4
  -5 -15   1 3.82155 4.28014   2
  -5 -15   1 9.79469 4.87040   7
  -5 -15   1 10.6695 4.43302   5
  -5  15   1 9.39338 4.68191   1
   5  15  -1 9.45278 4.55121   3
  -4 -15   1 44.6976 7.73948   7
  -4 -15   1 55.4820 7.65292   4
   4 -15  -1 52.0470 6.97914   4
  -4 -15   1 46.0021 7.28993   2
   4 -15  -1 42.0546 6.47803   2
  -4 -15   1 38.9322 6.89440   5
  -4  15   1 47.7596 7.46194   1
   4  15  -1 48.6460 7.52791   3
   3 -15  -1 12.1934 4.79116   4
   3 -15  -1 10.4036 4.31769   2
  -3 -15   1 11.0820 4.61450   2
   3 -15  -1 17.0797 5.49358   7
  -3 -15   1 16.4282 5.78804   7
  -3 -15   1 11.4544 4.50465   4
  -3 -15   1 16.8493 5.02521   5
   3  15  -1 8.21962 4.13598   3
  -3  15   1 10.9529 4.65586   1
   3  15  -1 9.23730 4.57517   1
   2 -15  -1 -0.8524 4.08580   7
  -2 -15   1 -0.2553 3.94646   7
  -2 -15   1 0.13531 3.75344   2
  -2 -15   1 -1.3807 3.83959   4
   2 -15  -1 1.17517 3.97624   2
   2 -15  -1 5.21900 3.78003   4
  -2 -15   1 -0.1387 3.63437   5
   2  15  -1 -1.4963 5.34423   3
  -2  15   1 1.47683 3.58822   1
   2  15  -1 -4.9972 3.28175   1
  -1 -15   1 23.9857 5.63589   5
  -1 -15   1 10.9109 5.29591   7
   1 -15  -1 10.6716 5.51663   7
  -1 -15   1 16.8997 5.31585   4
  -1 -15   1 19.6232 5.02734   2
   1 -15  -1 20.4122 5.06973   2
   1 -15  -1 31.2934 5.95550   4
   1  15  -1 19.7511 5.30735   1
  -1  15   1 17.0835 4.93844   1
  -1  15   1 10.2622 4.94066   7
   0 -15   1 86.9274 11.6385   7
   0 -15  -1 96.5404 12.1433   7
   0 -15   1 99.2041 10.3445   2
   0 -15  -1 90.4307 10.7869   4
   0 -15   1 88.7652 10.5302   4
   0 -15  -1 94.9627 10.1942   2
   0  15   1 86.8485 10.0842   1
   0  15   1 76.3473 10.5575   7
   0  15  -1 101.553 9.80663   1
   1 -15   1 16.3173 5.16487   2
  -1 -15  -1 19.8717 5.33167   5
  -1 -15  -1 15.7157 5.28783   4
   1 -15   1 25.4834 5.76857   4
   1 -15   1 28.0489 6.78584   7
  -1 -15  -1 13.9579 5.30196   7
  -1 -15  -1 16.8878 5.00080   2
   1  15   1 23.9032 5.61674   1
   1  15   1 30.0111 6.18155   7
  -1  15  -1 21.6329 5.34332   1
   2 -15   1 9.72728 5.29227   7
  -2 -15  -1 12.6559 4.70768   5
   2 -15   1 16.2044 5.21822   4
   2 -15   1 8.94739 4.02351   2
  -2 -15  -1 11.8144 5.07472   7
  -2 -15  -1 8.58401 4.29064   2
  -2 -15  -1 10.6849 4.70252   4
  -2  15  -1 9.18566 4.45333   1
   2  15   1 13.0155 4.97341   1
   2  15   1 14.0101 4.37747   3
  -3 -15  -1 39.5885 6.79450   5
   3 -15   1 38.4000 6.17098   2
  -3 -15  -1 36.2045 7.20754   7
  -3 -15  -1 47.8045 7.02970   4
   3 -15   1 33.4009 7.25227   7
   3 -15   1 30.8716 5.90603   4
  -3 -15  -1 25.4420 5.84888   2
  -3  15  -1 32.9464 6.26003   1
   3  15   1 34.3260 6.35469   3
   3  15   1 39.2226 7.29232   1
  -4 -15  -1 24.5916 5.69120   5
  -4 -15  -1 19.8964 5.53859   4
  -4 -15  -1 28.2878 6.71750   7
   4 -15   1 25.5989 5.39026   2
   4 -15   1 28.2462 5.24485   4
  -4 -15  -1 21.8012 5.59197   2
  -4  15  -1 20.1672 5.52766   1
   4  15   1 22.4451 5.51526   3
   5 -15   1 9.75089 4.02054   2
  -5 -15  -1 14.1938 4.96006   7
  -5 -15  -1 7.48494 4.27013   4
  -5 -15  -1 17.0310 4.60449   5
  -5 -15  -1 5.27530 3.80813   2
   5  15   1 17.4980 5.44397   3
  -5  15  -1 3.95918 4.24260   1
  -6 -15  -1 43.6135 6.79838   7
  -6 -15  -1 32.3407 5.86276   5
  -6 -15  -1 27.0043 5.73024   4
  -6 -15  -1 21.8660 5.58483   2
   6  15   1 43.2645 7.28234   3
  -6  15  -1 43.5367 6.53395   1
  -5 -16   1 -1.9933 3.89152   2
  -5 -16   1 5.95460 4.49699   4
  -5 -16   1 2.80092 4.09936   7
  -5 -16   1 5.43362 3.85100   5
   5  16  -1 2.27839 4.28785   3
  -5  16   1 1.47453 3.89433   1
   4 -16  -1 3.66477 3.76294   2
   4 -16  -1 3.78426 3.80358   4
  -4 -16   1 12.7848 4.74926   4
  -4 -16   1 18.0676 5.29918   7
  -4 -16   1 7.63897 4.24938   2
  -4 -16   1 11.0729 4.55835   5
  -4  16   1 -0.5732 3.82870   1
   4  16  -1 9.35579 4.29609   3
  -3 -16   1 0.70681 4.53930   7
   3 -16  -1 7.70326 3.90039   4
  -3 -16   1 5.97353 4.26202   4
  -3 -16   1 5.88590 4.13975   5
  -3 -16   1 5.66282 4.13052   2
   3 -16  -1 2.80803 4.51075   7
   3 -16  -1 5.16280 3.60498   2
   3  16  -1 10.8823 4.60524   1
  -3  16   1 3.26184 4.01552   1
  -2 -16   1 15.1015 5.34794   7
  -2 -16   1 13.5730 5.64212   4
   2 -16  -1 13.6066 5.73938   7
  -2 -16   1 14.5751 4.84207   2
   2 -16  -1 17.5589 4.78008   2
  -2 -16   1 23.1997 5.52534   5
   2 -16  -1 16.2708 5.34979   4
   2  16  -1 17.8065 5.24116   1
  -2  16   1 21.1036 5.30999   1
  -1 -16   1 7.80184 4.48829   4
  -1 -16   1 27.9427 5.58792   2
  -1 -16   1 26.4588 6.93005   7
   1 -16  -1 14.6302 4.95260   4
   1 -16  -1 22.2656 6.15969   7
   1 -16  -1 13.9435 4.48978   2
   1  16  -1 11.6433 4.73618   1
  -1  16   1 25.3330 5.58933   1
   0 -16  -1 13.7131 5.23340   4
   0 -16  -1 21.1320 6.39254   7
   0 -16   1 19.0348 5.11950   2
   0 -16  -1 21.8651 5.68714   2
   0 -16   1 24.5228 5.70093   4
   0 -16   1 10.2003 5.51483   7
   0  16   1 26.0721 5.74321   1
   0  16  -1 20.2502 5.27153   1
  -1 -16  -1 13.7046 4.69819   2
  -1 -16  -1 18.4326 5.25107   4
  -1 -16  -1 15.5125 5.65692   7
   1 -16   1 1.64277 3.73401   4
   1 -16   1 16.7424 4.78308   2
   1 -16   1 18.9069 5.94485   7
  -1  16  -1 12.6056 4.60062   1
   1  16   1 17.1729 5.13387   1
  -2 -16  -1 -0.0673 3.47894   5
  -2 -16  -1 4.06773 3.79306   2
   2 -16   1 5.30067 3.59542   2
   2 -16   1 2.15473 4.65404   7
  -2 -16  -1 -1.6408 3.41020   4
  -2 -16  -1 -1.1748 4.20565   7
   2 -16   1 -1.4978 3.05596   4
  -2  16  -1 6.50347 4.23687   1
   2  16   1 -0.6785 3.32702   1
   3 -16   1 0.04178 3.53915   2
  -3 -16  -1 8.19298 4.42141   5
  -3 -16  -1 -4.2869 3.97052   7
   3 -16   1 6.17264 3.80031   4
   3 -16   1 5.21122 4.34118   7
  -3 -16  -1 4.47108 4.44038   4
  -3 -16  -1 4.32282 3.97131   2
   3  16   1 2.98967 4.13505   1
  -3  16  -1 5.06558 3.98282   1
   3  16   1 7.14199 4.40265   3
   4 -16   1 9.17364 4.08080   2
  -4 -16  -1 12.1612 4.87802   4
  -4 -16  -1 13.8705 4.75759   2
   4 -16   1 6.94976 3.95216   4
  -4 -16  -1 12.4869 4.99200   7
  -4 -16  -1 14.0141 4.49229   5
  -4  16  -1 13.4621 4.92924   1
   4  16   1 17.5405 5.17573   3
  -5 -16  -1 8.15504 4.55286   2
  -5 -16  -1 2.73188 3.61022   5
  -5 -16  -1 5.89273 4.05830   4
  -5 -16  -1 0.47007 3.80485   7
   5  16   1 4.20981 4.32930   3
  -5  16  -1 -2.9114 3.95123   1
  -4 -17   1 18.3620 5.20831   5
   4 -17  -1 30.1779 5.70483   2
   4 -17  -1 21.7011 5.18177   4
  -4 -17   1 28.2205 6.15085   4
  -4 -17   1 21.5202 5.42556   2
  -4 -17   1 33.4007 6.78244   7
  -4  17   1 34.2174 6.57901   1
  -3 -17   1 16.2767 5.24480   4
   3 -17  -1 16.1153 4.78795   2
  -3 -17   1 20.7276 6.09063   7
  -3 -17   1 24.6043 6.07155   5
   3 -17  -1 16.8719 6.40185   7
   3 -17  -1 18.4626 5.12288   4
  -3 -17   1 16.9164 5.01147   2
  -3  17   1 13.0975 4.77930   1
   3  17  -1 14.1607 5.11657   1
  -2 -17   1 2.34136 3.85872   2
   2 -17  -1 2.90008 4.25638   7
  -2 -17   1 18.3201 6.63866   7
   2 -17  -1 4.69617 4.36388   4
  -2 -17   1 9.13891 4.46117   4
   2 -17  -1 9.06065 4.28673   2
  -2  17   1 6.84848 4.31638   1
   2  17  -1 11.9142 4.67693   1
  -1 -17   1 17.3091 5.10198   2
   1 -17  -1 19.7945 5.33759   2
  -1 -17   1 13.6639 5.27791   4
   1 -17  -1 13.8503 5.22568   4
   1 -17  -1 10.0645 5.41622   7
  -1 -17   1 10.3373 5.44427   7
   1  17  -1 29.2758 5.99951   1
  -1  17   1 17.6445 4.93565   1
   0 -17  -1 71.9793 10.5910   7
   0 -17  -1 76.3115 9.27184   2
   0 -17   1 81.0690 10.1040   4
   0 -17   1 95.9139 11.9465   7
   0 -17   1 60.3208 8.51509   2
   0 -17  -1 77.4129 9.81371   4
   0  17  -1 71.4921 9.14523   1
   0  17   1 85.1654 9.40172   1
   1 -17   1 14.3104 5.77975   7
   1 -17   1 6.57474 4.51601   4
  -1 -17  -1 11.7544 4.67435   4
  -1 -17  -1 10.7825 4.60144   2
   1 -17   1 8.46609 4.27825   2
  -1 -17  -1 5.26143 4.84950   7
   1  17   1 10.9951 4.22743   1
  -1  17  -1 4.18149 3.88861   1
  -2 -17  -1 5.01498 4.03916   2
   2 -17   1 11.8571 5.22133   7
   2 -17   1 13.3367 4.64951   4
  -2 -17  -1 15.5836 5.00644   4
   2 -17   1 6.22781 3.87520   2
  -2 -17  -1 12.2720 5.51658   7
  -2 -17  -1 4.39164 5.28218   5
  -2  17  -1 7.72691 4.65070   1
   2  17   1 8.23703 4.50102   1
  -3 -17  -1 25.6280 5.98871   4
  -3 -17  -1 24.7816 6.01661   5
  -3 -17  -1 21.2947 6.31290   7
   3 -17   1 39.2526 6.42904   4
  -3 -17  -1 27.6463 5.94819   2
   3 -17   1 35.3111 7.60083   7
   3 -17   1 33.8105 6.05677   2
   3  17   1 27.9981 6.09131   1
  -3  17  -1 40.2437 6.46221   1
  -4 -17  -1 4.09408 4.70457   7
   4 -17   1 0.60766 3.55128   2
  -4 -17  -1 1.83569 3.73113   4
  -4 -17  -1 8.43293 4.02206   5
   4 -17   1 1.68334 3.43318   4
  -4 -17  -1 2.78902 4.20914   2
  -4  17  -1 3.10652 3.87520   1
  -3 -18   1 4.65292 4.13942   7
   3 -18  -1 11.2199 5.62716   7
  -3 -18   1 14.2744 5.02765   5
   3 -18  -1 11.5280 4.46049   2
  -3 -18   1 7.49584 4.36086   2
  -3 -18   1 8.25294 4.56729   4
   3 -18  -1 1.76173 3.56741   4
   3  18  -1 9.96480 4.94121   1
  -3  18   1 5.50511 4.15250   1
   2 -18  -1 20.4158 6.30849   7
   2 -18  -1 22.8909 5.17809   2
  -2 -18   1 24.3393 6.37355   7
  -2 -18   1 15.7498 4.90657   2
  -2 -18   1 23.1234 5.93787   4
   2 -18  -1 12.5152 4.73147   4
  -2  18   1 28.2715 5.99341   1
   2  18  -1 24.9151 5.76800   1
  -1 -18   1 12.1497 5.50285   7
   1 -18  -1 18.0307 4.95060   2
  -1 -18   1 15.8168 4.85866   4
   1 -18  -1 4.43619 4.35038   4
   1 -18  -1 8.23564 4.83943   7
  -1 -18   1 8.60749 4.83427   2
   1  18  -1 12.2217 4.94204   1
  -1  18   1 4.88883 4.62913   1
   0 -18   1 16.4455 5.78959   7
   0 -18  -1 20.0207 6.40040   7
   0 -18  -1 22.5588 5.71617   4
   0 -18  -1 11.8117 4.76577   2
   0 -18   1 9.61199 4.82861   2
   0 -18   1 2.59605 4.44367   4
   0  18   1 15.3925 4.94948   1
   0  18  -1 16.8085 5.33011   1
   1 -18   1 3.39571 3.71324   2
  -1 -18  -1 10.8108 4.46827   2
   1 -18   1 12.0102 5.18865   7
   1 -18   1 6.98348 4.41423   4
  -1 -18  -1 13.5452 5.47738   7
  -1 -18  -1 5.39929 4.77486   4
  -1  18  -1 15.9918 4.95984   1
   1  18   1 17.5616 5.25401   1
   2 -18   1 18.7398 6.08162   7
   2 -18   1 21.4687 5.37186   4
  -2 -18  -1 15.8739 5.17540   2
   2 -18   1 12.3371 4.69197   2
  -2 -18  -1 24.5185 6.57695   7
  -2 -18  -1 15.6522 5.42622   4
   2  18   1 25.1841 6.07434   1
  -2  18  -1 27.0842 5.76787   1
   3 -18   1 -0.3942 3.93221   4
  -3 -18  -1 -1.5684 4.22232   4
   3  18   1 2.24959 4.01349   1
  -3  18  -1 6.66471 4.15461   1
 -10   0   2 29.5688 6.11381   6
 -10   0   2 40.4776 6.95310   1
  -9   0   2 12.2015 4.64812   6
  -9   0   2 5.18942 3.74247   1
  -8   0   2 3.32411 3.14679   2
  -8   0   2 4.77061 4.45607   1
  -8   0   2 3.90891 3.86163   6
   7   0  -2 11.8709 4.49911   3
  -7   0   2 19.5262 4.33192   2
  -7   0   2 18.2575 4.58952   6
  -7   0   2 10.9749 4.74152   1
  -6   0   2 29.7535 2.34993   4
  -6   0   2 29.5032 5.35009   6
  -6   0   2 38.2625 5.27565   2
  -6   0   2 39.7024 6.60953   1
   6   0  -2 35.4518 6.12473   3
  -5   0   2 37.5740 5.23058   2
   5   0  -2 39.4633 6.16910   3
  -5   0   2 39.1143 6.38743   1
  -5   0   2 35.1588 3.01240   5
  -5   0   2 33.6593 5.44692   6
  -4   0   2 831.287 54.6013   5
   4   0  -2 861.050 56.6110   3
  -4   0   2 829.760 56.3612   6
  -4   0   2 863.462 55.9600   2
  -4   0   2 822.990 56.7944   1
   3   0  -2 42.9094 5.80164   3
  -3   0   2 35.6950 3.13448   7
   3   0  -2 34.3545 3.52115   7
  -3   0   2 42.1463 3.42297   5
  -3   0   2 40.1672 4.63454   2
  -3   0   2 40.6828 5.24661   6
  -3   0   2 43.4506 5.79220   1
   2   0  -2 1472.97 95.8311   7
  -2   0   2 1483.80 95.7343   5
   2   0  -2 1434.67 96.5194   3
  -2   0   2 1497.85 96.6084   3
  -2   0   2 1493.77 96.5684   6
   2   0  -2 1433.41 95.6059   5
   2   0  -2 1518.14 96.6145   6
  -2   0   2 1450.29 96.0018   2
  -2   0   2 1536.71 95.4595   4
  -2   0   2 1492.82 95.7766   7
   1   0  -2 8.53342 1.89520   6
   1   0  -2 8.78517 1.46473   5
  -1   0   2 8.42030 1.86756   6
   1   0  -2 8.08921 1.60477   7
  -1   0   2 7.04781 1.37009   5
   1   0  -2 6.44182 1.11046   4
  -1   0   2 9.26043 1.64815   7
   1   0  -2 4.33291 0.93299   2
  -1   0   2 4.93352 1.29291   4
  -1   0   2 4.22466 0.99045   2
   0   0  -2 13.4716 1.55713   4
   1   0   2 49.1722 3.65272   5
   1   0   2 41.8910 4.06719   3
  -1   0  -2 42.3875 3.42921   4
  -1   0  -2 50.7137 3.73873   5
  -1   0  -2 43.7709 3.89544   3
  -1   0  -2 52.2853 3.79604   7
  -2   0  -2 787.988 51.8697   1
  -2   0  -2 772.136 50.9968   5
   2   0   2 781.585 50.7861   5
  -2   0  -2 782.635 51.9192   3
   2   0   2 795.635 51.0723   7
   2   0   2 785.174 51.9986   3
  -2   0  -2 805.169 50.9274   7
  -3   0  -2 20.7181 2.02328   5
   3   0   2 23.5921 4.37440   3
  -3   0  -2 20.1847 3.86261   1
   3   0   2 22.6663 2.15088   7
  -4   0  -2 237.998 18.4313   1
   4   0   2 255.135 18.7626   3
  -4   0  -2 252.994 16.3023   5
  -5   0  -2 10.8544 3.67858   1
  -5   0  -2 6.20023 3.38442   6
   5   0   2 3.19357 3.50549   3
  -5   0  -2 8.72778 3.34232   2
  -6   0  -2 117.637 10.3197   6
   6   0   2 116.324 11.0401   3
  -6   0  -2 106.960 10.4764   1
  -6   0  -2 108.104 10.1716   2
  -7   0  -2 12.8764 4.10777   1
   7   0   2 15.7461 4.75295   3
  -7   0  -2 13.7804 3.95019   6
  -7   0  -2 15.7892 4.40934   2
   8   0   2 80.4320 9.83452   3
  -8   0  -2 61.9585 8.35967   1
  -8   0  -2 62.8414 8.02564   2
  -8   0  -2 56.4826 7.64485   6
   9   0   2 7.02936 4.53677   3
  -9   0  -2 3.53933 3.39336   1
  -9   0  -2 3.91381 3.37998   2
  -9   0  -2 4.85149 3.41952   6
 -10  -1   2 4.83391 4.07368   6
 -10  -1   2 5.76062 4.27323   1
 -10   1   2 3.42251 3.66534   1
  -9  -1   2 4.34631 4.15475   1
  -9  -1   2 0.87458 2.88925   2
  -9  -1   2 -1.2072 3.12994   6
  -9   1   2 -0.2465 3.47739   6
  -9   1   2 5.06154 3.84378   1
  -8  -1   2 7.53449 3.92699   6
  -8  -1   2 1.76375 3.48513   1
  -8  -1   2 -0.9796 2.77484   2
  -8   1   2 2.47481 3.22937   6
   8   1  -2 4.94803 4.80360   3
  -8   1   2 6.07769 4.40368   1
  -8   1   2 5.05526 3.13689   2
  -7  -1   2 10.5263 3.57981   2
  -7  -1   2 8.97242 4.32367   1
  -7  -1   2 4.81017 3.58582   6
   7   1  -2 8.11190 4.33591   3
  -7   1   2 9.12587 3.74734   6
  -7   1   2 5.67177 3.45833   1
  -7   1   2 6.52317 3.14032   2
  -6  -1   2 84.8407 9.91433   1
   6  -1  -2 91.7098 9.94812   3
  -6  -1   2 85.7011 5.60218   4
  -6  -1   2 86.7117 8.77067   2
  -6  -1   2 67.1176 8.60993   6
  -6   1   2 84.0920 9.16642   6
  -6   1   2 73.1168 5.81236   4
  -6   1   2 94.4534 10.0142   1
  -6   1   2 78.8014 7.84025   2
   6   1  -2 92.5093 10.4189   3
  -5  -1   2 2.42824 2.32777   2
   5  -1  -2 0.92502 3.03840   3
  -5  -1   2 2.68766 3.26076   6
   5  -1  -2 5.46854 1.50790   7
  -5  -1   2 2.87833 1.11338   5
  -5   1   2 5.41997 1.05174   4
  -5   1   2 2.14463 2.48764   2
   5   1  -2 11.2682 4.18820   3
  -5   1   2 4.44481 2.86551   6
  -5   1   2 3.85650 3.14245   1
  -5   1   2 4.08866 1.25799   5
  -5   1   2 4.23210 1.02392   4
  -4  -1   2 23.2830 2.41811   5
  -4  -1   2 27.4365 4.67364   6
  -4  -1   2 17.2034 3.77135   2
   4  -1  -2 31.1603 4.78554   3
  -4   1   2 21.4386 1.96664   4
  -4   1   2 18.3630 1.96731   4
  -4   1   2 24.8167 4.90772   1
  -4   1   2 22.3630 2.61111   5
  -4   1   2 22.1365 4.21013   6
   4   1  -2 13.3437 4.36795   3
  -4   1   2 19.6321 1.93130   7
  -3  -1   2 35.4584 3.41120   7
  -3  -1   2 46.9455 5.02285   2
   3  -1  -2 39.8045 5.26190   3
  -3  -1   2 40.6436 5.44343   6
  -3  -1   2 40.7052 3.44855   5
   3  -1  -2 37.4553 4.33293   7
   3   1  -2 42.0997 3.79365   7
  -3   1   2 37.7384 3.62903   5
  -3   1   2 34.3455 3.07509   4
   3   1  -2 38.3635 5.70419   3
  -3   1   2 40.7907 5.80498   1
  -3   1   2 33.6735 3.40327   7
  -3   1   2 36.5858 4.83128   6
  -3   1   2 40.5536 3.15193   4
  -2  -1   2 14.6964 4.06938   3
  -2  -1   2 22.6448 2.01018   4
   2  -1  -2 19.8133 3.18517   6
  -2  -1   2 20.5991 2.31309   5
  -2  -1   2 19.9435 2.86073   2
   2  -1  -2 21.5276 2.79135   7
  -2  -1   2 17.6918 2.45844   7
   2  -1  -2 27.2858 4.16613   1
  -2  -1   2 21.0277 3.66094   6
   2  -1  -2 18.0436 2.47995   5
  -2   1   2 8.77466 2.87870   6
  -2   1   2 4.52259 3.11966   1
  -2   1   2 7.87334 2.22325   7
   2   1  -2 6.06039 3.24236   3
  -2   1   2 5.46407 2.62883   3
  -1  -1   2 51.7675 4.46507   7
  -1  -1   2 55.0088 4.16685   5
  -1  -1   2 53.7935 4.64123   6
   1  -1  -2 43.4918 4.21542   7
   1  -1  -2 55.4666 4.12752   4
  -1  -1   2 52.7519 4.09925   2
  -1  -1   2 46.5177 4.48551   3
   1  -1  -2 56.7317 4.85429   1
  -1  -1   2 51.2991 4.06425   4
   1  -1  -2 48.7665 4.21213   6
   1  -1  -2 52.5695 4.20109   5
   1   1  -2 50.5631 4.13255   2
  -1   1   2 47.7189 4.23765   5
   1   1  -2 52.1300 4.40227   7
   1   1  -2 47.7757 3.98979   4
  -1   1   2 47.9883 4.16779   4
  -1   1   2 49.1198 3.54049   2
   1   1  -2 52.5053 4.59003   3
  -1   1   2 48.7310 4.68554   1
  -1   1   2 45.9326 4.40147   7
   1   1  -2 50.9109 4.07825   5
  -1   1   2 52.9141 4.23236   6
   0  -1  -2 39.4197 3.20392   5
   0  -1   2 28.9615 2.82643   2
   0  -1  -2 34.8831 2.79153   6
   0  -1  -2 35.1465 2.65368   1
   0  -1  -2 33.9319 3.25956   7
   0  -1  -2 36.6262 3.03062   4
   0   1  -2 35.7669 2.67856   6
   0   1  -2 32.6572 2.69827   1
   0   1  -2 35.5691 3.12229   5
   0   1  -2 33.0821 3.00979   4
   0   1  -2 32.0618 2.82121   2
   0   1   2 32.7173 2.75997   2
   0   1  -2 32.3485 3.27357   7
   1  -1   2 25.1500 2.56642   4
  -1  -1  -2 29.1423 3.26625   3
  -1  -1  -2 26.2903 3.50476   2
  -1  -1  -2 27.2026 3.08728   7
  -1  -1  -2 27.6223 2.90196   5
   1  -1   2 28.5091 2.86284   3
   1  -1   2 25.9712 2.76273   5
  -1  -1  -2 26.2019 2.57807   4
  -1  -1  -2 22.2488 2.67293   1
   1  -1   2 32.0789 3.02433   1
   1  -1   2 27.2463 2.96010   7
  -1   1  -2 28.3258 2.97777   5
   1   1   2 29.2250 2.89102   7
  -1   1  -2 29.0823 2.81096   4
  -1   1  -2 32.8013 3.14477   7
   1   1   2 35.5957 3.65406   3
   1   1   2 31.5459 2.78964   5
  -1   1  -2 29.9042 2.74617   3
  -1   1  -2 37.4654 2.90703   1
  -2  -1  -2 560.534 36.7785   5
  -2  -1  -2 573.342 36.7941   7
   2  -1   2 557.513 36.7120   5
   2  -1   2 552.066 37.5671   1
  -2  -1  -2 560.241 36.7527   7
  -2  -1  -2 557.596 37.9378   2
   2  -1   2 546.671 37.4594   3
  -2   1  -2 568.161 36.8315   5
  -2   1  -2 564.572 36.5113   4
  -2   1  -2 569.381 36.5499   4
  -2   1  -2 589.890 36.9140   7
  -2   1  -2 553.781 37.4834   1
   2   1   2 555.595 36.5802   5
  -2   1  -2 560.987 37.3614   3
   2   1   2 580.661 37.9919   3
   3  -1   2 14.8881 3.66441   3
  -3  -1  -2 14.9848 1.74601   5
   3  -1   2 19.2214 2.32978   7
  -3  -1  -2 13.8307 3.54652   2
  -3   1  -2 13.7360 3.06060   6
  -3   1  -2 11.6257 2.87684   1
  -3   1  -2 12.9508 1.80058   5
   3   1   2 13.6855 1.82615   7
  -3   1  -2 13.4017 1.60405   7
   3   1   2 15.0973 3.88084   3
  -4  -1  -2 314.366 20.6164   2
   4  -1   2 303.594 18.2843   7
   4  -1   2 297.476 20.1155   3
  -4  -1  -2 315.520 18.1272   5
  -4   1  -2 244.115 19.8719   1
  -4   1  -2 236.610 19.4516   6
  -4   1  -2 239.906 18.1751   5
   4   1   2 232.619 20.3620   3
  -5  -1  -2 -1.2093 2.69217   2
  -5  -1  -2 -0.4736 2.40245   1
   5  -1   2 4.09485 3.46548   3
  -5   1  -2 3.57872 2.82507   1
   5   1   2 7.27902 3.62583   3
  -5   1  -2 4.52837 2.83243   6
  -6  -1  -2 61.3903 8.15234   2
  -6  -1  -2 75.4630 8.71664   6
   6  -1   2 72.5268 8.94989   3
  -6  -1  -2 76.0244 8.83668   1
  -6   1  -2 82.1404 9.12988   1
  -6   1  -2 81.1685 7.73903   6
   6   1   2 73.9735 9.43740   3
  -7  -1  -2 4.52286 3.39758   2
  -7  -1  -2 7.69644 3.80201   1
   7  -1   2 7.43266 4.35470   3
  -7  -1  -2 9.29184 3.80648   6
   7   1   2 10.4912 4.70802   3
  -7   1  -2 9.41057 3.37960   6
  -7   1  -2 12.4254 4.33522   2
  -7   1  -2 10.0127 4.17624   1
   8  -1   2 19.9725 5.31659   3
  -8  -1  -2 34.1102 5.53415   6
  -8  -1  -2 28.4957 5.66424   1
  -8  -1  -2 22.0291 5.02037   2
  -8   1  -2 21.5059 4.97404   1
  -8   1  -2 22.8038 5.18281   6
  -8   1  -2 21.4845 5.06173   2
   8   1   2 37.6215 6.93250   3
  -9  -1  -2 10.6364 3.92748   1
  -9  -1  -2 4.83411 3.79132   6
  -9  -1  -2 7.74422 3.95264   2
   9  -1   2 5.37265 4.48892   3
  -9   1  -2 9.77767 4.10256   2
  -9   1  -2 4.63927 3.72479   1
   9   1   2 7.59059 5.12723   3
 -10  -2   2 15.9567 4.90917   1
 -10  -2   2 7.12939 4.59004   6
 -10   2   2 9.29134 4.49683   1
  -9  -2   2 -1.4904 3.04458   6
  -9  -2   2 0.35559 3.17967   1
  -9  -2   2 1.13763 2.88063   2
   9   2  -2 0.47414 3.93113   3
  -9   2   2 0.63573 3.20676   6
  -9   2   2 1.53066 3.58484   1
  -8  -2   2 14.9637 5.04264   6
  -8  -2   2 7.09948 3.81543   2
  -8  -2   2 6.76393 4.23853   1
   8   2  -2 13.1843 5.18142   3
  -8   2   2 6.51354 4.47468   1
  -8   2   2 3.32516 3.14595   6
  -8   2   2 11.7926 3.67817   2
  -7  -2   2 42.9076 6.91267   1
  -7  -2   2 22.8948 4.62654   2
  -7  -2   2 32.9941 6.02634   6
  -7   2   2 39.7310 5.75203   6
  -7   2   2 33.1279 6.09087   1
   7   2  -2 17.5570 5.34415   3
  -7   2   2 29.7112 5.07179   2
  -6  -2   2 193.016 15.5765   2
  -6  -2   2 202.683 13.5602   5
  -6  -2   2 208.839 13.6134   4
  -6  -2   2 192.427 16.1743   6
  -6   2   2 217.139 15.8623   6
   6   2  -2 215.893 16.8081   3
  -6   2   2 188.930 16.3335   1
  -6   2   2 190.248 15.3265   2
  -6   2   2 202.842 13.8835   4
  -5  -2   2 22.9060 4.06930   2
  -5  -2   2 20.4981 2.35931   5
   5  -2  -2 20.4384 2.82866   7
  -5  -2   2 16.0934 4.37345   6
  -5   2   2 20.8747 2.53511   4
  -5   2   2 19.7176 2.56385   5
  -5   2   2 24.1384 5.05243   1
  -5   2   2 20.3425 2.44500   4
  -5   2   2 17.3916 4.14473   6
   5   2  -2 12.4460 4.74344   3
  -4  -2   2 571.767 39.2748   2
  -4  -2   2 588.509 39.9884   6
  -4  -2   2 585.358 37.9375   7
  -4  -2   2 577.914 38.1055   5
  -4  -2   2 595.021 37.8612   7
  -4   2   2 563.571 38.0347   7
  -4   2   2 583.075 39.2703   6
   4   2  -2 547.749 39.9892   3
  -4   2   2 590.831 38.3052   5
  -4   2   2 574.584 38.0647   4
  -4   2   2 576.879 38.0799   4
  -4   2   2 603.105 40.0926   1
  -3  -2   2 73.3941 6.02735   7
  -3  -2   2 73.7143 5.87844   7
   3  -2  -2 75.6041 5.90862   5
  -3  -2   2 77.4946 5.93350   5
  -3  -2   2 66.7009 6.59663   2
  -3  -2   2 73.8173 5.70895   4
   3   2  -2 80.8464 7.78721   3
  -3   2   2 75.8295 5.92689   4
  -3   2   2 69.4778 5.80141   4
  -3   2   2 76.5586 6.23527   5
  -3   2   2 78.7552 6.72346   6
  -3   2   2 72.2959 6.13246   7
  -3   2   2 82.4288 8.37481   1
   2  -2  -2 1206.36 78.4721   4
  -2  -2   2 1194.14 79.0755   2
   2  -2  -2 1239.01 78.5399   4
  -2  -2   2 1186.68 78.7614   5
  -2  -2   2 1219.95 78.9737   7
  -2  -2   2 1167.42 78.6007   4
   2  -2  -2 1155.04 78.9744   7
  -2   2   2 1211.31 79.4988   1
  -2   2   2 1206.88 78.5354   2
   2   2  -2 1245.84 78.9768   7
  -2   2   2 1197.78 78.9662   3
  -2   2   2 1231.18 78.7396   4
   2   2  -2 1223.23 79.6547   3
  -2   2   2 1274.89 79.0172   7
   2   2  -2 1189.84 79.1040   2
  -2   2   2 1224.95 78.8740   5
  -2   2   2 1227.83 78.9795   6
  -1  -2   2 191.267 13.5267   3
   1  -2  -2 181.566 13.3514   5
   1  -2  -2 187.473 13.5037   1
   1  -2  -2 183.213 13.5007   7
  -1  -2   2 177.110 13.2080   4
  -1  -2   2 187.974 13.2564   2
  -1  -2   2 197.111 13.6184   7
   1  -2  -2 186.764 13.2526   4
   1  -2  -2 210.267 13.1911   6
  -1  -2   2 198.013 13.5531   1
  -1  -2   2 196.433 13.3296   5
   1  -2  -2 195.297 12.7805   2
  -1   2   2 186.940 13.2499   4
  -1   2   2 197.973 13.5049   1
  -1   2   2 183.358 13.6217   7
  -1   2   2 201.149 13.1133   6
  -1   2   2 199.589 12.7803   2
   1   2  -2 178.261 13.2650   5
   1   2  -2 192.003 13.5343   3
   1   2  -2 182.246 13.5809   7
   1   2  -2 189.901 13.2707   2
  -1   2   2 196.864 13.4012   5
   1   2  -2 178.050 13.1636   4
   0  -2   2 321.095 21.9440   1
   0  -2   2 337.012 22.2497   4
   0  -2   2 325.274 22.4620   7
   0  -2  -2 325.642 22.1663   4
   0  -2  -2 335.969 22.4897   7
   0  -2  -2 325.622 22.4213   7
   0  -2   2 337.796 22.1076   2
   0  -2  -2 334.804 21.9885   1
   0  -2  -2 329.535 22.0332   2
   0  -2  -2 340.238 22.0249   6
   0  -2  -2 329.224 22.2898   5
   0   2  -2 326.061 22.2959   5
   0   2   2 346.205 22.2197   4
   0   2   2 333.111 22.0013   1
   0   2  -2 334.665 22.3026   4
   0   2   2 335.113 22.0467   6
   0   2  -2 332.258 22.4945   7
   0   2  -2 309.698 21.9438   1
   0   2  -2 342.026 22.1097   2
   0   2   2 324.207 22.4570   7
   0   2   2 339.796 22.0475   2
   1  -2   2 266.007 18.3472   7
   1  -2   2 277.187 18.1415   2
   1  -2   2 264.142 17.3780   3
  -1  -2  -2 275.537 18.3903   2
  -1  -2  -2 273.190 18.1508   6
   1  -2   2 252.725 17.7511   1
   1  -2   2 260.663 17.8312   4
  -1  -2  -2 249.183 18.0638   7
  -1  -2  -2 249.456 18.0135   3
  -1  -2  -2 265.583 18.2750   7
  -1  -2  -2 260.680 17.7916   4
  -1  -2  -2 274.621 17.8382   1
  -1  -2  -2 266.829 18.0136   5
   1   2   2 260.831 18.3224   2
  -1   2  -2 257.703 17.9113   4
   1   2   2 277.538 18.2182   7
   1   2   2 244.426 17.9250   5
  -1   2  -2 260.772 17.1230   6
  -1   2  -2 271.717 17.3210   3
  -1   2  -2 275.700 17.8197   1
  -1   2  -2 264.236 18.0234   5
  -1   2  -2 260.203 18.2111   7
  -1   2  -2 263.739 17.9942   2
   1   2   2 272.233 17.8667   1
   1   2   2 260.404 18.1973   3
  -2  -2  -2 824.057 53.1023   7
   2  -2   2 805.566 53.2740   7
   2  -2   2 803.013 52.4776   4
  -2  -2  -2 826.198 53.0795   7
   2  -2   2 829.886 53.0733   5
  -2  -2  -2 825.755 53.0051   5
   2  -2   2 751.715 53.0728   3
  -2  -2  -2 808.108 53.9546   2
   2  -2   2 791.776 53.5270   1
  -2  -2  -2 823.719 53.4058   1
   2  -2   2 809.987 52.6550   4
  -2   2  -2 810.132 53.4002   1
  -2   2  -2 826.828 53.0832   3
   2   2   2 806.838 53.9200   3
  -2   2  -2 809.228 52.9171   4
  -2   2  -2 811.510 52.8772   6
  -2   2  -2 826.794 52.8375   4
  -2   2  -2 832.028 53.0965   5
  -2   2  -2 792.354 53.1870   7
  -3  -2  -2 42.8349 5.73899   2
  -3  -2  -2 44.8282 3.54858   7
  -3  -2  -2 37.7189 3.66090   5
  -3  -2  -2 40.7957 3.52668   7
   3  -2   2 47.3298 5.20964   3
  -3   2  -2 35.8604 4.76957   1
  -3   2  -2 32.9905 3.74635   7
  -3   2  -2 31.6824 4.25785   6
  -3   2  -2 34.3993 3.34438   4
  -3   2  -2 35.9517 3.73115   5
   3   2   2 29.3470 5.42810   3
  -3   2  -2 32.4580 3.33653   4
   4  -2   2 16.0375 2.37962   7
  -4  -2  -2 12.4838 3.77774   2
  -4  -2  -2 10.0571 1.66306   5
   4  -2   2 13.2458 3.59673   3
  -4   2  -2 6.54183 1.61157   5
  -4   2  -2 4.92795 3.01255   1
  -4   2  -2 7.09624 1.48791   4
  -4   2  -2 8.46106 1.51375   4
  -4   2  -2 9.15810 2.77474   6
   4   2   2 5.68844 1.52481   7
   4   2   2 10.5809 3.87569   3
   5  -2   2 4.67741 3.39569   3
  -5  -2  -2 7.50652 1.31894   5
  -5  -2  -2 9.23104 3.75244   2
   5  -2   2 7.10233 1.70714   7
  -5  -2  -2 4.38097 1.08243   5
  -5   2  -2 5.65751 3.26428   1
  -5   2  -2 7.47289 1.43855   4
  -5   2  -2 3.83471 2.68128   6
   5   2   2 5.48460 3.85730   3
  -5   2  -2 5.99130 1.42686   4
   6  -2   2 141.174 12.2851   3
  -6  -2  -2 143.218 12.3784   1
  -6  -2  -2 135.534 12.3086   2
  -6  -2  -2 131.211 12.3127   6
  -6   2  -2 157.455 12.3963   1
   6   2   2 157.274 13.1455   3
  -6   2  -2 139.603 11.7455   6
  -7  -2  -2 28.4703 5.76029   6
   7  -2   2 31.9169 5.86971   3
  -7  -2  -2 27.3613 5.78717   2
  -7  -2  -2 18.6448 5.28783   1
   7   2   2 20.6742 5.62498   3
  -7   2  -2 25.3113 4.55927   6
  -7   2  -2 17.4209 4.82325   1
  -8  -2  -2 18.5993 5.06555   2
   8  -2   2 26.1267 5.70349   3
  -8  -2  -2 16.3036 4.91018   1
  -8  -2  -2 19.9473 5.50756   6
  -8   2  -2 28.7139 5.35390   2
   8   2   2 17.7265 5.64354   3
  -8   2  -2 28.5572 4.99723   6
  -8   2  -2 17.0786 4.52201   1
  -9  -2  -2 9.54190 4.11925   6
  -9  -2  -2 2.35824 2.95983   1
  -9  -2  -2 -1.6674 3.50659   2
   9  -2   2 -4.1328 3.24659   3
  -9   2  -2 -1.4041 2.57758   1
  -9   2  -2 5.55764 3.58884   2
   9   2   2 2.65650 4.33956   3
  -9  -3   2 -2.1198 3.35818   6
  -9  -3   2 0.69661 3.42928   1
  -9  -3   2 -0.9653 2.95306   2
   9   3  -2 -4.6984 3.89121   3
  -9   3   2 2.12321 3.34561   6
  -9   3   2 -0.6644 3.06954   1
  -8  -3   2 18.4001 5.28076   1
  -8  -3   2 16.4085 4.99809   6
  -8  -3   2 14.7135 4.19238   2
   8   3  -2 15.2795 5.47540   3
  -8   3   2 16.6784 4.40758   6
  -8   3   2 24.0488 4.60517   2
  -8   3   2 17.5037 5.02183   1
  -7  -3   2 7.29106 3.43881   2
  -7  -3   2 6.15105 1.22602   5
  -7  -3   2 3.50300 1.10857   5
  -7  -3   2 5.80045 4.07614   6
   7   3  -2 2.55657 4.36496   3
  -7   3   2 4.20301 3.75814   1
  -7   3   2 6.37651 3.13961   2
  -7   3   2 9.97640 3.59369   6
  -6  -3   2 68.6036 5.25157   4
  -6  -3   2 74.6774 5.36328   5
  -6  -3   2 71.0312 7.95819   2
  -6  -3   2 61.3219 8.44349   6
  -6   3   2 58.2237 5.47908   4
   6   3  -2 67.4170 8.84082   3
  -6   3   2 50.3915 6.94938   6
  -6   3   2 67.9840 8.42474   1
  -5  -3   2 0.92774 1.05415   7
  -5  -3   2 -0.9954 1.32637   5
  -5  -3   2 -0.8029 3.06681   6
  -5  -3   2 1.85056 1.36549   4
  -5  -3   2 -0.0390 1.00884   7
  -5  -3   2 0.83191 2.39157   2
  -5   3   2 -0.0142 1.47631   5
  -5   3   2 -0.2598 1.43378   4
  -5   3   2 7.25010 3.66423   1
   5   3  -2 6.59756 4.03146   3
  -5   3   2 -3.0042 2.28992   6
  -4  -3   2 216.486 14.9406   7
  -4  -3   2 201.343 14.7439   5
  -4  -3   2 217.730 14.7375   7
  -4  -3   2 218.182 16.0630   2
  -4  -3   2 209.188 14.6495   4
   4  -3  -2 209.467 15.2784   7
  -4   3   2 207.700 16.3298   1
  -4   3   2 209.099 14.8906   4
  -4   3   2 217.588 15.1586   4
  -4   3   2 205.878 15.6027   6
   4   3  -2 208.619 16.8658   3
  -4   3   2 216.282 14.9992   7
  -4   3   2 223.407 15.1187   5
   3  -3  -2 32.4881 3.91237   5
  -3  -3   2 29.9985 4.19988   7
  -3  -3   2 33.7409 4.02847   7
  -3  -3   2 37.5744 5.03408   2
   3  -3  -2 37.0992 3.07442   4
   3  -3  -2 30.4431 2.99702   4
  -3  -3   2 31.3254 3.81129   4
   3  -3  -2 32.4541 4.50129   7
  -3  -3   2 35.5270 4.00989   5
  -3   3   2 29.7910 4.98435   1
  -3   3   2 35.8475 4.08369   4
  -3   3   2 36.5889 4.30378   7
  -3   3   2 40.9158 4.09885   2
  -3   3   2 29.3090 3.99622   5
   3   3  -2 36.4398 5.99930   3
  -3   3   2 38.1000 4.29421   6
   2  -3  -2 442.189 30.5555   4
   2  -3  -2 462.879 30.5132   2
   2  -3  -2 486.226 30.6699   4
  -2  -3   2 468.524 30.8905   7
  -2  -3   2 464.549 31.0977   7
   2  -3  -2 460.199 31.1652   7
   2  -3  -2 455.244 30.6968   6
  -2  -3   2 469.416 30.8367   5
  -2  -3   2 458.938 31.1184   2
  -2  -3   2 459.304 30.6748   4
  -2   3   2 436.187 30.9822   7
   2   3  -2 438.771 31.4731   3
  -2   3   2 453.733 30.6025   6
  -2   3   2 467.571 31.0901   5
  -2   3   2 475.916 31.4375   1
  -2   3   2 462.224 30.8290   4
  -2   3   2 450.939 30.3567   2
   1  -3  -2 60.3673 6.41667   7
  -1  -3   2 60.9475 5.74566   3
  -1  -3   2 66.8155 5.92023   2
   1  -3  -2 62.9139 5.20857   2
  -1  -3   2 60.6695 6.00250   4
  -1  -3   2 63.5534 6.13354   5
   1  -3  -2 58.3355 6.04699   5
   1  -3  -2 54.9071 5.61132   1
   1  -3  -2 59.5275 5.61609   4
   1  -3  -2 59.7304 6.51201   7
  -1  -3   2 68.7380 6.04027   7
   1  -3  -2 73.9562 5.44789   6
  -1  -3   2 61.7554 5.93717   1
  -1  -3   2 67.4424 6.26070   7
   1   3  -2 60.5333 6.28904   1
   1   3  -2 54.6946 5.91481   3
  -1   3   2 65.0859 5.23488   2
   1   3  -2 56.6304 6.10482   7
  -1   3   2 67.0938 6.26166   4
  -1   3   2 68.0458 5.24916   6
   1   3  -2 58.0862 5.69940   5
   1   3  -2 56.2680 5.67932   4
   1   3  -2 57.3987 5.61359   2
  -1   3   2 60.9652 6.06668   5
  -1   3   2 64.6202 5.88687   1
  -1   3   2 57.1312 6.28754   7
   0  -3   2 525.264 34.4111   3
   0  -3  -2 514.732 34.9782   4
   0  -3   2 541.772 35.1896   5
   0  -3  -2 542.698 35.4871   7
   0  -3   2 533.255 35.2794   7
   0  -3   2 508.164 34.7948   1
   0  -3   2 501.096 35.1104   4
   0  -3  -2 503.664 35.3159   7
   0  -3  -2 474.048 34.6640   6
   0  -3  -2 531.058 34.8282   2
   0  -3  -2 504.819 34.7835   1
   0  -3   2 550.700 34.9694   2
   0  -3  -2 541.816 35.2777   5
   0  -3   2 525.646 35.5868   7
   0   3  -2 501.210 35.0367   4
   0   3  -2 524.286 35.4133   7
   0   3   2 562.612 34.9323   2
   0   3   2 512.880 35.3656   7
   0   3  -2 541.130 35.2169   5
   0   3   2 542.370 34.8783   6
   0   3   2 516.937 34.6017   3
   0   3  -2 509.949 34.8238   1
   0   3  -2 531.274 34.9293   2
   0   3   2 522.204 35.4795   7
   0   3   2 552.242 35.0809   4
   0   3   2 534.965 34.8826   1
   0   3   2 583.363 35.3826   5
   1  -3   2 226.848 15.6247   1
   1  -3   2 200.101 15.8066   7
   1  -3   2 212.116 15.4232   4
  -1  -3  -2 226.573 15.7762   5
  -1  -3  -2 203.738 15.9008   7
   1  -3   2 213.679 16.1082   7
   1  -3   2 201.478 15.5630   4
  -1  -3  -2 222.685 15.6309   4
   1  -3   2 220.578 14.6963   6
  -1  -3  -2 205.811 16.0285   6
   1  -3   2 217.791 15.7761   2
  -1  -3  -2 226.989 15.7539   3
  -1  -3  -2 223.266 16.2505   7
  -1  -3  -2 228.370 15.5605   1
  -1  -3  -2 208.990 15.9065   2
  -1   3  -2 241.824 15.8826   4
  -1   3  -2 226.847 14.7243   6
  -1   3  -2 220.943 15.8468   5
  -1   3  -2 263.885 15.7663   1
   1   3   2 224.810 16.0610   7
   1   3   2 225.281 15.9423   3
  -1   3  -2 234.834 16.1790   7
  -1   3  -2 241.785 15.8446   2
   1   3   2 242.274 15.7313   1
   1   3   2 233.357 15.9984   7
   1   3   2 223.077 16.0818   2
   2  -3   2 827.588 54.7670   5
   2  -3   2 777.645 54.3400   4
  -2  -3  -2 828.768 54.9388   7
   2  -3   2 785.699 54.9979   7
   2  -3   2 773.198 54.1301   6
  -2  -3  -2 810.709 54.8297   7
   2  -3   2 774.834 54.2927   3
   2  -3   2 793.931 54.3519   4
  -2  -3  -2 779.849 55.3718   2
  -2  -3  -2 799.842 54.6728   5
  -2   3  -2 905.178 55.1563   7
  -2   3  -2 927.265 54.8019   4
  -2   3  -2 855.019 54.2324   3
  -2   3  -2 916.946 54.9244   5
   2   3   2 878.965 54.8629   7
  -2   3  -2 869.095 54.0571   6
   2   3   2 870.501 55.5208   3
  -2   3  -2 838.420 54.8253   1
   3  -3   2 0.12626 2.19547   3
  -3  -3  -2 0.92240 1.79602   7
  -3  -3  -2 1.49653 1.99490   7
  -3  -3  -2 2.29978 1.77815   5
   3  -3   2 1.51285 2.18744   7
   3  -3   2 2.04491 1.61451   5
  -3  -3  -2 -1.8832 2.79749   2
  -3   3  -2 -0.9382 1.67074   6
  -3   3  -2 4.39154 2.22844   7
  -3   3  -2 6.07997 2.28613   3
  -3   3  -2 2.82459 1.95609   4
  -3   3  -2 0.34656 1.71783   5
   3   3   2 -2.9910 2.97025   3
  -3   3  -2 0.65233 2.24595   1
  -3   3  -2 4.15874 1.89438   4
  -4  -3  -2 254.206 15.7010   7
  -4  -3  -2 250.798 15.7199   7
   4  -3   2 259.443 17.0290   3
  -4  -3  -2 244.986 15.8822   5
  -4  -3  -2 257.496 15.9582   5
  -4  -3  -2 260.540 17.8125   2
  -4   3  -2 198.080 16.2390   6
  -4   3  -2 204.201 15.7856   4
  -4   3  -2 206.718 15.7067   4
   4   3   2 221.653 17.9647   3
  -4   3  -2 190.950 16.6785   1
  -4   3  -2 214.709 16.0147   5
  -5  -3  -2 10.7457 4.03403   2
  -5  -3  -2 20.1782 2.54774   5
   5  -3   2 24.8709 4.44059   3
   5  -3   2 16.8606 2.98103   7
  -5  -3  -2 17.4179 2.44319   5
  -5   3  -2 23.0600 3.80759   6
  -5   3  -2 23.5660 3.50493   4
  -5   3  -2 22.2649 4.23194   1
   5   3   2 20.9643 5.17077   3
  -5   3  -2 18.9811 2.65791   4
  -6  -3  -2 68.3593 5.64062   5
  -6  -3  -2 72.4049 5.73480   5
   6  -3   2 72.1802 8.74486   3
  -6  -3  -2 103.356 10.1811   2
  -6   3  -2 88.8500 7.70495   6
   6   3   2 94.2191 10.3796   3
  -6   3  -2 94.7252 6.31384   4
  -6   3  -2 82.4679 7.95206   1
  -7  -3  -2 19.7283 5.24263   6
  -7  -3  -2 22.0117 5.27204   2
   7  -3   2 19.4890 5.05886   3
   7   3   2 23.2525 6.13687   3
  -7   3  -2 19.8799 4.27027   6
  -7   3  -2 24.9316 5.11376   1
  -8  -3  -2 29.3203 5.68603   2
   8  -3   2 24.3101 5.41652   3
  -8  -3  -2 21.0795 5.36858   1
  -8  -3  -2 30.3984 5.83577   6
  -8   3  -2 21.9743 6.80158   6
  -8   3  -2 21.7010 5.23949   1
   8   3   2 18.2077 6.05965   3
  -8   3  -2 11.7129 4.04462   2
  -9  -3  -2 5.70362 4.30133   6
  -9  -3  -2 12.0610 4.01920   2
  -9  -3  -2 6.27513 3.35439   1
   9   3   2 -1.7505 4.40859   3
  -9   3  -2 6.44617 3.35846   2
  -9   3  -2 1.96759 3.38541   1
  -9  -4   2 0.79426 3.16154   2
  -9  -4   2 6.50774 4.49956   1
  -9  -4   2 -2.2606 3.22676   6
   9   4  -2 -3.2809 3.35151   3
  -9   4   2 -2.7616 2.86366   1
  -8  -4   2 46.2870 7.03467   2
  -8  -4   2 40.7925 7.60391   6
  -8   4   2 61.3660 7.26604   6
   8   4  -2 63.4079 8.97967   3
  -8   4   2 51.4516 7.52941   1
  -7  -4   2 4.87519 1.57796   5
  -7  -4   2 7.42092 4.02299   6
  -7  -4   2 8.41305 3.53452   2
  -7  -4   2 3.70026 1.51565   5
   7   4  -2 6.53205 4.40449   3
  -7   4   2 2.05504 3.13277   6
  -7   4   2 7.09154 3.75019   1
  -6  -4   2 69.1693 5.43145   5
  -6  -4   2 58.7638 8.19683   6
  -6  -4   2 58.0635 5.38001   4
  -6  -4   2 83.8940 8.25516   2
  -6  -4   2 74.7359 5.47793   5
  -6   4   2 53.0376 5.48336   4
  -6   4   2 54.1204 6.82000   6
   6   4  -2 29.9470 7.08249   3
  -6   4   2 56.5586 7.81864   1
  -5  -4   2 6.14013 2.07365   4
   5  -4  -2 11.6008 2.93630   7
  -5  -4   2 5.45904 3.09403   2
  -5  -4   2 8.62168 2.20017   5
  -5  -4   2 9.22999 2.14763   7
  -5  -4   2 8.33867 2.12499   7
  -5   4   2 8.45675 2.49810   4
  -5   4   2 8.46942 2.85146   6
   5   4  -2 8.60110 4.23494   3
  -5   4   2 3.96546 3.28921   1
  -4  -4   2 10.5876 2.72770   7
  -4  -4   2 8.90824 2.29511   7
  -4  -4   2 7.84619 2.23813   5
  -4  -4   2 10.0726 3.47149   2
  -4  -4   2 7.76828 2.50816   4
   4  -4  -2 9.49459 2.93895   7
  -4   4   2 8.04726 2.64556   5
  -4   4   2 3.80140 2.43193   7
  -4   4   2 3.62851 3.13894   1
  -4   4   2 3.75001 2.40822   6
   4   4  -2 0.49702 3.31908   3
  -4   4   2 4.90070 2.35345   4
  -3  -4   2 16.2646 2.97165   5
  -3  -4   2 11.9552 2.89002   4
   3  -4  -2 16.4457 2.67353   4
   3  -4  -2 14.7739 2.49674   4
  -3  -4   2 12.2652 2.91906   7
   3  -4  -2 7.67030 3.11725   7
   3  -4  -2 13.8301 2.93020   5
  -3  -4   2 17.1108 3.49224   2
  -3  -4   2 13.5595 3.27789   7
  -3   4   2 9.82947 2.85810   4
  -3   4   2 24.3657 3.86851   7
  -3   4   2 15.6657 3.94962   1
  -3   4   2 16.0415 2.98932   6
   3   4  -2 20.7605 5.03519   3
  -3   4   2 15.0347 3.33514   5
  -3   4   2 19.3059 3.67043   3
   2  -4  -2 916.522 60.1317   7
   2  -4  -2 940.246 59.4730   4
   2  -4  -2 916.540 59.1497   2
  -2  -4   2 941.625 59.8020   7
  -2  -4   2 938.781 59.9875   7
  -2  -4   2 951.528 59.8160   2
   2  -4  -2 885.202 59.1939   6
   2  -4  -2 888.351 59.3828   4
  -2  -4   2 951.438 59.5908   4
  -2  -4   2 895.575 59.5689   5
  -2   4   2 854.493 59.6841   5
  -2   4   2 883.423 59.0072   2
  -2   4   2 868.063 59.0317   6
   2   4  -2 910.561 60.1082   3
  -2   4   2 870.386 59.5479   4
  -2   4   2 899.290 59.8424   7
  -2   4   2 852.295 59.7079   1
  -1  -4   2 2.77166 2.77459   4
   1  -4  -2 4.96866 2.68500   4
   1  -4  -2 3.32181 2.58755   5
   1  -4  -2 -0.3763 2.83756   7
   1  -4  -2 3.88090 1.87183   6
  -1  -4   2 9.89841 3.09449   7
   1  -4  -2 7.24130 2.13324   2
  -1  -4   2 5.20201 2.68856   5
  -1  -4   2 6.53507 2.97398   7
  -1  -4   2 4.71556 2.71081   2
  -1  -4   2 3.44408 2.74763   3
  -1   4   2 10.8964 2.37225   6
   1   4  -2 3.75473 2.60131   3
  -1   4   2 0.27063 3.00602   7
  -1   4   2 2.42894 2.88690   7
   1   4  -2 7.69606 3.10194   1
  -1   4   2 9.07633 2.21179   2
  -1   4   2 10.4542 3.20176   5
   1   4  -2 2.63488 2.74618   4
  -1   4   2 7.23887 2.62438   1
  -1   4   2 4.26150 2.72521   4
   1   4  -2 6.66725 3.19254   5
   0  -4   2 79.0313 6.19377   3
   0  -4  -2 94.8297 7.08233   2
   0  -4   2 87.3631 8.05788   7
   0  -4  -2 80.4107 7.97152   7
   0  -4   2 80.5259 7.37107   4
   0  -4   2 75.4469 6.36008   6
   0  -4  -2 72.7311 7.45954   7
   0  -4  -2 76.0450 6.61137   6
   0  -4  -2 90.2832 7.50964   5
   0  -4   2 80.0381 7.80101   7
   0  -4   2 81.6116 7.47079   5
   0  -4   2 76.6099 7.23770   2
   0   4   2 81.6682 7.06107   1
   0   4   2 80.6130 6.55553   3
   0   4  -2 87.0687 7.57366   5
   0   4   2 84.4108 6.87846   2
   0   4   2 85.2413 7.35062   5
   0   4   2 85.4696 7.09715   6
   0   4   2 89.1622 7.75869   7
   0   4   2 83.4411 7.16245   4
   0   4  -2 74.1930 7.62722   7
   0   4  -2 78.6209 6.26314   3
   0   4  -2 71.6720 7.01364   1
  -1  -4  -2 16.0650 3.96300   7
  -1  -4  -2 23.2022 3.87615   2
  -1  -4  -2 21.7899 3.65142   5
   1  -4   2 24.0772 3.79167   2
  -1  -4  -2 28.9502 4.24455   7
   1  -4   2 23.1036 2.32756   6
   1  -4   2 14.2707 3.43828   5
   1  -4   2 27.8110 4.16143   4
   1  -4   2 12.4044 3.71160   7
   1   4   2 24.7475 4.06730   3
   1   4   2 19.2527 3.35800   1
  -1   4  -2 25.8642 3.62022   1
  -1   4  -2 19.3766 2.31200   6
  -1   4  -2 18.9102 4.00142   7
  -1   4  -2 14.9620 3.51995   5
   1   4   2 16.9392 3.68799   7
   2  -4   2 275.148 18.9874   4
  -2  -4  -2 275.796 19.5420   7
   2  -4   2 267.861 19.5642   2
  -2  -4  -2 283.674 19.5035   5
   2  -4   2 285.897 19.4411   5
   2  -4   2 285.722 18.4205   3
  -2  -4  -2 258.917 19.8810   2
   2  -4   2 286.603 18.4915   6
  -2  -4  -2 300.580 19.8960   7
   2  -4   2 264.700 19.1471   4
   2  -4   2 266.627 19.7962   7
   2   4   2 261.063 19.6206   7
  -2   4  -2 296.354 19.5169   1
  -2   4  -2 286.175 19.7896   7
  -2   4  -2 274.626 18.2770   3
   2   4   2 266.898 19.5473   1
  -2   4  -2 282.603 19.5774   5
   2   4   2 260.012 19.9078   3
  -2   4  -2 270.319 18.2836   6
   3  -4   2 24.4536 3.63339   3
   3  -4   2 34.1370 3.58670   6
   3  -4   2 27.4681 2.99021   4
   3  -4   2 18.2894 3.82472   7
  -3  -4  -2 18.9333 3.73878   7
   3  -4   2 20.1582 2.83701   4
   3  -4   2 32.3103 3.89777   5
  -3  -4  -2 24.3326 3.94673   7
  -3  -4  -2 26.9395 4.94219   2
  -3  -4  -2 23.4051 3.61390   5
  -3   4  -2 25.5508 3.82261   5
  -3   4  -2 29.1486 4.29688   7
  -3   4  -2 26.9335 3.55376   4
   3   4   2 21.7977 4.94719   3
  -3   4  -2 35.4521 4.59505   1
  -3   4  -2 28.7459 3.17429   6
   3   4   2 26.8293 3.88751   7
  -3   4  -2 34.5323 3.70133   3
  -4  -4  -2 288.395 19.6977   5
   4  -4   2 286.473 20.0444   7
  -4  -4  -2 285.618 21.0996   2
   4  -4   2 297.452 20.0946   3
  -4  -4  -2 300.600 19.6846   7
  -4  -4  -2 272.703 19.5649   5
  -4  -4  -2 285.582 19.6076   7
  -4   4  -2 283.760 19.5992   4
  -4   4  -2 266.191 20.3646   1
   4   4   2 290.916 21.5940   3
  -4   4  -2 286.896 19.9012   5
  -4   4  -2 282.095 19.9500   7
  -4   4  -2 271.503 19.5114   6
  -5  -4  -2 54.2173 4.60949   7
  -5  -4  -2 54.2041 4.59260   7
  -5  -4  -2 50.2079 5.05209   5
  -5  -4  -2 59.7954 7.57913   2
  -5  -4  -2 50.8152 4.97430   5
   5  -4   2 61.5621 6.88454   3
   5   4   2 62.6877 8.28185   3
  -5   4  -2 53.4835 5.16353   4
  -5   4  -2 67.2416 7.49539   1
  -5   4  -2 53.7705 5.77532   6
   6  -4   2 26.7916 4.86355   3
  -6  -4  -2 36.6799 3.36520   5
  -6  -4  -2 28.8228 5.53422   2
  -6  -4  -2 30.5964 3.16687   5
  -6   4  -2 20.0270 3.98663   6
  -6   4  -2 19.9922 4.54830   1
   6   4   2 29.9054 6.51077   3
  -6   4  -2 23.8886 3.37086   4
   7  -4   2 15.5765 4.28245   3
  -7  -4  -2 9.97772 4.17544   2
  -7  -4  -2 18.1341 2.05601   5
  -7  -4  -2 15.2766 1.84484   5
  -7   4  -2 12.2117 3.47801   6
  -7   4  -2 15.4485 4.42665   1
   7   4   2 15.6812 5.90838   3
  -8  -4  -2 20.2047 5.61148   6
  -8  -4  -2 27.0659 5.54087   2
  -8  -4  -2 18.6123 4.93578   1
  -8   4  -2 23.4533 5.17710   1
   8   4   2 22.4306 6.29351   3
  -9  -4  -2 -4.7285 3.05693   6
  -9  -4  -2 2.14799 3.16459   2
  -9  -4  -2 4.52173 3.60104   1
   9   4   2 -0.1702 3.89634   3
  -9   4  -2 1.68287 3.13135   1
  -9  -5   2 3.52378 4.03509   6
  -9  -5   2 2.03672 3.46045   1
  -9  -5   2 -8.0091 2.73906   2
  -9   5   2 -0.4950 3.20693   1
   9   5  -2 2.15853 3.78716   3
  -8  -5   2 9.74022 4.12366   2
  -8  -5   2 8.68270 4.82385   6
  -8  -5   2 8.76830 1.78646   5
  -8  -5   2 6.94912 1.66175   5
  -8   5   2 12.6466 4.38580   1
  -8   5   2 15.2183 3.50313   6
   8   5  -2 9.04006 4.73548   3
  -7  -5   2 5.78275 4.35206   6
  -7  -5   2 10.5963 3.79262   2
  -7  -5   2 11.1994 2.18990   5
  -7  -5   2 8.09214 2.14399   5
   7   5  -2 10.7599 5.03516   3
  -7   5   2 8.27213 3.04330   6
  -7   5   2 12.5806 4.29034   1
  -6  -5   2 9.77810 2.03247   7
  -6  -5   2 5.11536 2.10260   5
  -6  -5   2 8.77287 2.38538   5
  -6  -5   2 4.06421 3.91892   6
  -6  -5   2 8.17721 3.50415   2
  -6  -5   2 8.64048 2.58388   4
   6   5  -2 1.18064 3.82354   3
  -6   5   2 11.6704 4.00866   1
  -6   5   2 6.53676 2.98741   6
  -6   5   2 5.91387 2.71933   4
  -5  -5   2 45.7541 4.90783   5
  -5  -5   2 38.0944 4.86281   4
  -5  -5   2 36.8516 5.84323   2
  -5  -5   2 45.7766 4.85542   7
  -5  -5   2 43.5893 4.89389   7
   5  -5  -2 51.4862 5.92470   7
  -5   5   2 38.7420 4.93059   4
   5   5  -2 44.0466 7.08673   3
  -5   5   2 38.9823 4.99412   6
  -5   5   2 43.4660 6.42842   1
  -4  -5   2 198.037 14.6187   7
  -4  -5   2 204.384 14.6078   4
  -4  -5   2 192.572 15.1728   2
   4  -5  -2 199.172 13.6625   4
  -4  -5   2 206.421 15.0107   7
   4  -5  -2 201.449 15.2879   7
   4  -5  -2 202.541 13.6977   4
  -4  -5   2 198.625 14.6563   5
   4  -5  -2 197.043 14.5902   5
  -4   5   2 194.112 14.9378   5
   4   5  -2 192.405 16.0918   3
  -4   5   2 201.766 15.6311   1
  -4   5   2 208.629 14.7877   4
  -4   5   2 202.515 14.9622   7
  -4   5   2 187.518 14.3650   6
  -3  -5   2 42.8827 5.18013   4
  -3  -5   2 46.9150 5.36972   7
  -3  -5   2 48.9311 5.76000   7
   3  -5  -2 41.3308 4.69591   4
   3  -5  -2 39.6814 4.90662   5
   3  -5  -2 40.3257 4.70643   2
   3  -5  -2 37.7487 5.54117   7
  -3  -5   2 38.1043 4.97576   5
  -3  -5   2 40.0658 5.61548   2
  -3   5   2 38.8938 4.95532   4
  -3   5   2 38.7498 4.39880   3
  -3   5   2 33.7911 5.07486   5
  -3   5   2 44.1868 6.04740   1
  -3   5   2 33.2626 5.37483   7
   3   5  -2 32.1420 5.83568   3
  -3   5   2 33.6978 4.31164   6
   2  -5  -2 206.271 15.6702   7
  -2  -5   2 206.256 15.2085   4
  -2  -5   2 197.652 15.1596   5
   2  -5  -2 184.321 14.7891   4
  -2  -5   2 208.676 15.8013   7
  -2  -5   2 194.859 15.0717   2
   2  -5  -2 207.434 14.5419   2
  -2  -5   2 202.728 15.2901   7
   2   5  -2 213.972 15.6173   3
  -2   5   2 201.901 15.0313   1
   2   5  -2 195.486 15.3748   1
  -2   5   2 213.412 14.3015   6
  -2   5   2 209.487 15.3197   5
  -2   5   2 197.289 15.3435   7
  -2   5   2 197.448 15.0005   4
   1  -5  -2 45.5565 6.08581   7
  -1  -5   2 50.9816 6.27403   7
  -1  -5   2 34.0423 4.85674   2
  -1  -5   2 39.8406 5.18738   5
  -1  -5   2 37.6200 5.04697   4
   1  -5  -2 37.2742 5.10321   4
   1  -5  -2 43.9528 4.60733   2
   1   5  -2 42.1088 5.19983   1
  -1   5   2 34.7033 4.12126   6
   1   5  -2 30.5883 4.63040   3
  -1   5   2 28.1287 4.95764   5
  -1   5   2 35.3562 5.36503   7
  -1   5   2 38.2498 4.85679   1
  -1   5   2 33.6312 4.88320   4
   0  -5   2 425.376 28.7937   6
   0  -5  -2 435.441 29.2865   2
   0  -5  -2 434.623 29.7995   5
   0  -5  -2 421.545 30.2182   7
   0  -5   2 461.882 30.3503   7
   0  -5   2 423.116 29.7729   4
   0  -5   2 427.581 28.5329   3
   0  -5   2 396.449 29.2406   2
   0  -5   2 409.424 29.6382   5
   0   5   2 418.161 29.4878   4
   0   5   2 430.504 29.3620   1
   0   5  -2 448.226 29.8603   5
   0   5   2 446.135 29.3146   6
   0   5   2 433.700 29.8887   5
   0   5   2 422.611 28.7469   3
   0   5  -2 423.353 29.3759   1
   0   5  -2 447.786 28.6526   3
   0   5   2 475.108 30.3365   7
  -1  -5  -2 56.2700 6.59811   5
   1  -5   2 66.0229 7.18611   5
   1  -5   2 65.7799 5.01787   6
  -1  -5  -2 66.5487 7.50037   7
   1  -5   2 52.4173 7.19649   7
  -1  -5  -2 62.0848 7.09040   7
   1  -5   2 60.9874 6.81852   4
   1  -5   2 63.3882 6.71159   2
  -1  -5  -2 51.3506 6.44361   2
   1   5   2 73.5295 6.46221   3
  -1   5  -2 66.5210 5.20237   6
   1   5   2 57.0697 6.98151   7
   1   5   2 66.9785 6.24400   1
  -1   5  -2 76.3203 6.34178   1
  -1   5  -2 60.4424 6.75097   5
  -2  -5  -2 609.907 40.0466   7
   2  -5   2 619.835 40.5242   7
   2  -5   2 570.871 38.4929   6
  -2  -5  -2 612.904 39.8216   5
   2  -5   2 599.040 39.5106   4
   2  -5   2 630.047 39.8081   2
  -2  -5  -2 603.492 40.1938   7
  -2  -5  -2 600.121 40.1562   2
   2   5   2 598.267 40.2395   3
  -2   5  -2 561.018 38.0551   3
  -2   5  -2 564.138 39.7192   5
  -2   5  -2 579.852 39.6012   1
  -2   5  -2 602.557 40.2217   7
  -2   5  -2 565.931 38.4357   6
   2   5   2 563.988 39.8984   7
   2   5   2 591.983 39.9625   1
   3  -5   2 44.0166 4.75137   4
   3  -5   2 38.9543 5.62229   7
  -3  -5  -2 31.6549 4.84435   5
   3  -5   2 44.1069 4.23081   6
  -3  -5  -2 38.6523 5.13455   5
   3  -5   2 37.8516 4.46549   4
  -3  -5  -2 39.7406 5.50885   7
  -3  -5  -2 47.8132 6.32167   2
   3  -5   2 37.1164 5.05141   5
  -3  -5  -2 34.7434 5.09787   7
  -3   5  -2 47.0328 3.85370   6
  -3   5  -2 48.6080 5.67639   1
  -3   5  -2 48.3618 4.08594   3
   3   5   2 43.6696 5.28189   7
   3   5   2 49.5933 6.69220   3
  -3   5  -2 54.5253 5.75896   5
  -3   5  -2 54.2405 6.19015   7
  -4  -5  -2 25.2142 5.00887   2
  -4  -5  -2 26.9244 4.03636   7
   4  -5   2 22.0830 4.23491   7
  -4  -5  -2 27.8543 4.16158   7
  -4  -5  -2 29.1409 3.98343   5
  -4  -5  -2 29.1930 4.00344   5
  -4   5  -2 29.0245 3.96228   4
  -4   5  -2 29.3333 3.48550   6
  -4   5  -2 34.9141 4.60991   7
   4   5   2 25.1318 4.04537   7
  -4   5  -2 26.0291 4.38607   1
   4   5   2 32.7163 5.99461   3
  -5  -5  -2 18.5587 3.17439   7
  -5  -5  -2 20.2824 3.19942   5
  -5  -5  -2 28.1466 3.63181   5
   5  -5   2 22.0866 3.72332   7
  -5  -5  -2 18.7073 3.03585   7
  -5  -5  -2 14.6683 4.66513   2
  -5   5  -2 20.9942 3.29836   4
   5   5   2 25.2170 6.03047   3
  -5   5  -2 24.4922 4.28212   1
  -5   5  -2 19.0197 3.16977   6
  -6  -5  -2 77.9186 9.40603   2
  -6  -5  -2 76.3677 6.58082   5
  -6  -5  -2 73.0233 6.61908   5
  -6  -5  -2 81.6453 5.82460   7
  -6   5  -2 79.6228 8.76431   1
  -6   5  -2 78.2639 7.20072   6
   6   5   2 95.0706 10.6224   3
  -6   5  -2 84.9131 6.96838   4
  -7  -5  -2 13.8135 2.31071   5
  -7  -5  -2 16.6176 4.55626   2
  -7  -5  -2 12.0271 2.17907   5
   7   5   2 8.71874 4.75631   3
  -7   5  -2 14.2122 4.00349   1
  -8  -5  -2 68.8009 4.85079   5
  -8  -5  -2 65.5813 4.77519   5
  -8  -5  -2 80.5991 9.71033   6
  -8  -5  -2 67.4293 8.61985   2
  -8   5  -2 68.9906 8.31318   1
   8   5   2 61.4587 9.28222   3
  -9  -5  -2 3.75035 3.52560   1
  -9  -5  -2 2.67670 3.13175   2
  -9  -5  -2 -2.3187 3.35844   6
   9   5   2 -1.2550 4.16785   3
  -9   5  -2 -2.9955 2.92877   1
  -9  -6   2 3.85927 3.20046   2
  -9  -6   2 -0.8786 4.00117   6
  -9  -6   2 0.68193 0.99627   5
  -9  -6   2 0.81591 0.97492   5
   9   6  -2 8.43530 4.89229   3
  -9   6   2 1.10853 3.35686   1
  -8  -6   2 44.5894 7.48993   6
  -8  -6   2 34.5592 5.95931   2
  -8  -6   2 34.1484 4.26681   5
  -8  -6   2 33.6946 3.77358   5
  -8   6   2 25.4777 5.48357   1
   8   6  -2 33.9148 7.17887   3
  -7  -6   2 11.3041 4.40429   2
  -7  -6   2 7.19386 2.41877   5
  -7  -6   2 9.39852 4.33855   6
  -7  -6   2 6.50710 2.25864   5
  -7   6   2 11.8932 4.06244   1
  -7   6   2 11.0564 3.15765   6
   7   6  -2 12.3261 5.32987   3
  -6  -6   2 21.8091 4.65022   2
  -6  -6   2 23.9029 3.94134   4
  -6  -6   2 27.8443 3.87244   5
  -6  -6   2 31.6606 3.98322   7
  -6  -6   2 25.5383 3.79426   5
  -6   6   2 21.1551 4.06817   6
   6   6  -2 19.1794 5.49164   3
  -6   6   2 21.6866 5.04219   1
  -6   6   2 17.7921 3.90358   4
  -5  -6   2 43.0364 6.11049   2
  -5  -6   2 36.3288 4.74217   5
   5  -6  -2 37.9160 5.43489   7
  -5  -6   2 36.4340 5.11297   7
  -5  -6   2 36.6934 4.82241   7
  -5  -6   2 45.5596 5.13344   4
  -5   6   2 33.2177 4.81089   7
  -5   6   2 33.5257 4.67962   6
   5   6  -2 34.3265 6.50424   3
  -5   6   2 36.1489 5.13553   4
  -5   6   2 41.6207 5.96258   1
   4  -6  -2 22.5588 3.92646   5
  -4  -6   2 22.0706 3.88542   5
   4  -6  -2 17.2189 3.21985   4
  -4  -6   2 23.3494 4.44894   7
  -4  -6   2 20.6767 3.77197   4
   4  -6  -2 20.4661 3.04681   4
  -4  -6   2 25.0566 4.78250   2
  -4  -6   2 19.9261 3.84541   7
   4  -6  -2 18.2972 4.25266   7
  -4   6   2 18.9375 4.06617   7
  -4   6   2 23.5308 4.19547   4
   4   6  -2 32.4368 5.95526   3
  -4   6   2 21.3608 4.64173   1
  -4   6   2 22.9240 3.53876   6
   3  -6  -2 21.8991 4.94019   7
  -3  -6   2 18.3415 4.27692   2
   3  -6  -2 24.3458 3.72450   2
  -3  -6   2 22.6519 4.23968   7
  -3  -6   2 27.3051 4.42172   4
   3  -6  -2 18.5491 3.67783   5
  -3  -6   2 15.8135 3.81595   5
   3  -6  -2 28.9972 4.26673   4
  -3  -6   2 26.3680 4.52468   7
  -3   6   2 25.0070 4.64414   1
  -3   6   2 20.6446 3.09043   3
  -3   6   2 15.2090 3.93793   7
  -3   6   2 24.5001 3.38751   6
  -3   6   2 13.7915 3.77168   5
   3   6  -2 23.6676 5.17279   3
  -3   6   2 18.6924 4.23667   4
  -2  -6   2 917.404 59.3201   7
  -2  -6   2 912.988 58.8183   2
   2  -6  -2 928.594 58.1900   2
   2  -6  -2 892.105 59.3925   7
   2  -6  -2 914.019 58.6889   4
  -2  -6   2 906.906 58.8408   5
  -2  -6   2 924.864 58.8491   4
  -2   6   2 853.179 58.6992   1
   2   6  -2 869.745 59.0792   1
  -2   6   2 837.820 58.9407   5
  -2   6   2 826.536 59.0421   7
  -2   6   2 824.365 57.7507   6
  -2   6   2 843.147 58.6227   4
   2   6  -2 894.701 58.9228   3
  -1  -6   2 18.4188 4.36282   5
   1  -6  -2 19.7440 4.13357   4
   1  -6  -2 15.1118 4.10583   5
  -1  -6   2 22.0644 4.21594   2
   1  -6  -2 25.1610 5.04354   7
  -1  -6   2 26.7836 5.00489   7
  -1  -6   2 18.9063 4.13249   4
   1  -6  -2 17.1110 3.35653   2
  -1   6   2 21.4758 2.64050   3
  -1   6   2 16.2860 3.26618   6
  -1   6   2 23.3836 4.21016   4
  -1   6   2 27.0385 4.83896   7
   1   6  -2 18.4851 3.75099   3
  -1   6   2 19.8861 4.47639   5
   1   6  -2 21.1558 4.23516   1
  -1   6   2 26.8550 4.25226   1
   0  -6   2 215.849 17.5841   5
   0  -6  -2 245.472 17.1798   2
   0  -6   2 229.300 17.1387   2
   0  -6  -2 240.644 18.3001   7
   0  -6   2 240.454 17.6885   4
   0  -6  -2 212.255 17.5183   5
   0  -6  -2 240.043 17.6623   5
   0  -6   2 246.483 16.1571   3
   0  -6   2 247.500 18.3861   7
   0   6  -2 234.380 17.2172   1
   0   6   2 234.374 17.0277   6
   0   6   2 243.101 16.6240   3
   0   6   2 254.500 18.0672   7
   0   6  -2 232.486 17.5485   5
   0   6  -2 241.571 16.3424   3
   0   6   2 221.133 17.0745   1
  -1  -6  -2 111.745 9.64788   5
   1  -6   2 103.008 10.1020   7
   1  -6   2 104.403 9.45127   4
  -1  -6  -2 98.5697 9.98608   7
  -1  -6  -2 99.5867 9.66351   5
   1  -6   2 104.069 9.54661   5
   1  -6   2 117.037 9.30236   2
   1  -6   2 106.825 8.07540   6
  -1  -6  -2 102.513 9.36121   2
   1   6   2 114.680 10.0092   7
  -1   6  -2 115.104 9.21123   1
  -1   6  -2 112.699 8.25399   6
  -1   6  -2 115.433 9.69898   5
   1   6   2 106.200 9.16071   3
   1   6   2 123.149 9.39944   1
   2  -6   2 77.6022 6.01608   6
  -2  -6  -2 80.2198 7.85073   7
  -2  -6  -2 72.3106 8.24173   2
   2  -6   2 69.5021 7.69182   2
   2  -6   2 74.4693 8.56208   7
  -2  -6  -2 87.4113 7.76835   5
  -2  -6  -2 95.1374 8.04863   5
   2  -6   2 77.2320 7.45335   4
  -2  -6  -2 78.9286 8.52974   7
   2   6   2 73.4038 8.15576   3
  -2   6  -2 94.7383 8.86800   5
   2   6   2 89.1129 8.75322   7
  -2   6  -2 80.9054 6.01385   6
   2   6   2 72.7826 7.51574   1
  -2   6  -2 67.6945 7.20272   1
  -3  -6  -2 8.50584 3.46069   7
   3  -6   2 6.68125 3.23448   2
  -3  -6  -2 9.61057 2.90361   5
   3  -6   2 8.12615 2.66251   4
   3  -6   2 12.7742 3.59611   7
  -3  -6  -2 7.95455 3.17044   7
   3  -6   2 7.60313 2.11672   6
  -3  -6  -2 10.2562 3.17352   5
  -3  -6  -2 5.67464 3.37895   2
   3  -6   2 7.07297 2.83801   5
  -3   6  -2 8.28399 3.43183   7
  -3   6  -2 3.38624 2.91596   5
   3   6   2 11.7367 4.37284   3
  -3   6  -2 11.5377 1.69849   3
  -3   6  -2 11.3650 3.28296   1
  -3   6  -2 9.01958 1.82434   6
   3   6   2 12.2393 3.66693   7
  -4  -6  -2 43.2384 6.60929   2
  -4  -6  -2 44.1759 5.65746   7
   4  -6   2 48.9624 6.35595   7
   4  -6   2 39.9160 4.06168   4
   4  -6   2 31.6412 5.25355   5
  -4  -6  -2 44.8168 5.32056   5
  -4  -6  -2 42.5558 5.34947   5
  -4  -6  -2 39.9963 5.56049   7
   4  -6   2 38.4582 4.23050   4
  -4   6  -2 51.2813 5.12138   3
   4   6   2 48.7297 7.21760   3
  -4   6  -2 52.2530 6.32859   1
  -4   6  -2 52.8006 6.31483   7
  -4   6  -2 45.4663 4.09988   6
   4   6   2 45.5216 5.60590   7
   5  -6   2 20.2134 4.02851   7
  -5  -6  -2 18.0532 4.63302   2
  -5  -6  -2 16.0649 3.38869   5
  -5  -6  -2 16.6768 3.32369   5
  -5  -6  -2 21.7663 3.63943   7
   5   6   2 24.7876 5.88008   3
  -5   6  -2 17.3398 2.90761   6
  -5   6  -2 27.1660 4.64909   1
  -6  -6  -2 43.6736 6.80353   2
  -6  -6  -2 41.8278 4.93944   5
  -6  -6  -2 44.6803 4.73946   7
  -6  -6  -2 46.2403 5.18903   5
   6   6   2 35.5113 7.31959   3
  -6   6  -2 47.1659 5.13417   6
  -6   6  -2 46.1210 6.40057   1
  -7  -6  -2 9.24366 2.24896   5
  -7  -6  -2 2.22535 3.88075   2
  -7  -6  -2 6.69915 2.02381   5
   7   6   2 6.64342 5.24531   3
  -7   6  -2 3.40201 3.42483   1
  -8  -6  -2 29.1617 3.16870   5
  -8  -6  -2 23.0803 5.28985   2
  -8  -6  -2 30.8228 6.35256   6
  -8  -6  -2 27.9229 3.01901   5
   8   6   2 23.0693 6.09131   3
  -8   6  -2 18.8024 4.56602   1
  -9  -6  -2 0.59033 3.78128   6
  -9  -6  -2 -3.9875 3.33984   2
   9   6   2 2.11808 4.40296   3
  -9   6  -2 -1.3434 3.14478   1
  -9  -7   2 -1.7699 3.68184   6
  -9  -7   2 2.52325 1.55405   5
  -9  -7   2 4.52796 3.78666   2
   9   7  -2 0.65363 4.04076   3
  -9   7   2 6.52113 3.60123   1
  -8  -7   2 21.7346 3.32103   5
  -8  -7   2 27.5098 6.26045   6
  -8  -7   2 31.4019 5.68379   2
  -8   7   2 18.5176 5.12757   1
   8   7  -2 20.2272 5.88630   3
  -7  -7   2 6.21067 4.04377   2
  -7  -7   2 12.2531 2.69586   7
  -7  -7   2 10.0642 2.78139   5
  -7  -7   2 11.5757 4.90861   6
   7   7  -2 8.34755 4.65269   3
  -7   7   2 8.90479 4.05632   1
  -7   7   2 14.8316 3.93800   6
  -6  -7   2 28.4389 4.27561   5
  -6  -7   2 34.0928 4.74493   4
  -6  -7   2 35.9557 4.82064   7
  -6  -7   2 45.9717 6.44800   2
  -6  -7   2 35.1301 4.53181   5
  -6   7   2 24.4305 4.15516   6
  -6   7   2 20.2978 4.29266   4
   6   7  -2 21.9450 5.88976   3
  -6   7   2 31.8179 6.05886   1
  -5  -7   2 13.3781 3.30993   5
   5  -7  -2 14.1198 2.05523   4
  -5  -7   2 9.76173 3.15538   4
  -5  -7   2 11.3490 3.63477   7
   5  -7  -2 10.0891 3.38234   7
  -5  -7   2 13.8224 3.32281   5
  -5  -7   2 14.5698 4.09591   2
  -5   7   2 11.5944 3.35485   7
  -5   7   2 16.6885 4.53265   1
  -5   7   2 10.8053 3.33483   4
   5   7  -2 3.94485 3.99332   3
  -5   7   2 6.55735 2.51449   6
   4  -7  -2 209.937 15.3308   4
  -4  -7   2 237.827 16.6369   7
  -4  -7   2 203.110 15.9378   5
  -4  -7   2 219.486 16.0537   4
   4  -7  -2 232.867 17.0316   7
   4  -7  -2 209.274 15.9284   5
  -4  -7   2 221.693 16.5978   2
  -4  -7   2 218.325 16.0623   7
  -4   7   2 209.003 16.0120   4
  -4   7   2 205.028 16.4595   1
  -4   7   2 187.951 16.0764   7
   4   7  -2 208.948 17.0904   3
  -4   7   2 205.987 15.1782   6
  -3  -7   2 30.2252 5.13684   7
  -3  -7   2 27.6965 4.91909   4
  -3  -7   2 29.6839 4.84794   5
   3  -7  -2 29.8814 5.42201   7
   3  -7  -2 31.6211 4.54540   2
  -3  -7   2 28.1714 5.07977   2
   3  -7  -2 26.2195 4.44916   4
  -3   7   2 24.7713 3.30274   3
  -3   7   2 31.0001 5.14101   1
  -3   7   2 24.8752 5.07398   7
  -3   7   2 34.1248 4.06168   6
   3   7  -2 28.7652 5.74286   3
  -3   7   2 24.9412 4.54860   4
   2  -7  -2 261.534 17.5835   2
   2  -7  -2 245.248 18.7411   7
  -2  -7   2 222.894 17.8630   2
  -2  -7   2 227.834 18.5574   7
   2  -7  -2 248.510 17.9445   4
  -2  -7   2 252.365 18.2554   5
  -2  -7   2 259.829 18.3245   4
   2  -7  -2 242.072 18.3165   5
  -2   7   2 232.641 18.4985   7
   2   7  -2 246.362 18.0504   3
  -2   7   2 259.963 18.3140   4
  -2   7   2 224.511 16.8997   6
   2   7  -2 246.941 18.3355   1
  -2   7   2 220.129 17.7365   1
  -1  -7   2 73.5280 8.05320   4
  -1  -7   2 80.5674 8.04737   2
   1  -7  -2 67.1829 7.83322   4
  -1  -7   2 80.4496 8.91937   7
  -1  -7   2 77.1701 8.19548   5
   1  -7  -2 66.5157 8.66029   7
   1  -7  -2 68.1479 7.98372   5
   1  -7  -2 94.3694 7.42320   2
  -1   7   2 66.6651 7.51431   4
  -1   7   2 74.8503 5.85523   3
  -1   7   2 72.3041 8.86167   7
  -1   7   2 73.3319 7.35478   1
   1   7  -2 60.4289 7.42030   1
   1   7  -2 66.7962 6.86277   3
  -1   7   2 67.4590 6.46205   6
   0  -7  -2 105.046 9.78251   4
   0  -7  -2 116.037 9.23306   2
   0  -7   2 127.835 10.8537   7
   0  -7   2 101.625 7.96055   3
   0  -7  -2 96.2411 9.67920   5
   0  -7   2 98.1488 9.73229   5
   0  -7   2 118.034 9.48960   2
   0  -7  -2 111.912 9.95541   5
   0  -7  -2 89.4320 10.6562   7
   0  -7   2 89.9745 9.45637   4
   0   7   2 111.476 9.10144   6
   0   7   2 112.292 10.2735   7
   0   7   2 109.170 9.29600   1
   0   7  -2 116.153 8.38463   3
   0   7  -2 105.357 9.33639   1
   0   7   2 102.536 8.45755   3
   1  -7   2 57.3645 6.34583   2
  -1  -7  -2 46.0933 6.31490   5
   1  -7   2 47.3279 6.35308   4
  -1  -7  -2 44.6202 6.41784   5
  -1  -7  -2 52.2673 7.52063   7
  -1  -7  -2 53.1530 6.47092   2
   1  -7   2 53.6748 6.70403   5
   1  -7   2 49.6636 7.28269   7
   1   7   2 50.9087 7.03816   7
  -1   7  -2 52.8656 6.80092   5
   1   7   2 53.0662 6.52335   3
   1   7   2 46.3719 6.10336   1
  -1   7  -2 53.7999 6.16249   1
  -2  -7  -2 1191.36 77.8617   2
  -2  -7  -2 1182.75 78.2250   7
  -2  -7  -2 1164.25 77.8109   5
   2  -7   2 1149.25 77.5251   2
   2  -7   2 1111.53 76.1760   6
  -2  -7  -2 1218.76 77.9676   5
   2  -7   2 1159.71 78.3850   7
   2  -7   2 1216.40 77.8555   5
   2  -7   2 1178.07 77.6242   4
  -2   7  -2 1181.85 77.9271   5
   2   7   2 1197.06 78.0369   3
  -2   7  -2 1156.65 77.4405   1
  -2   7  -2 1155.37 76.2927   6
   2   7   2 1215.20 78.2430   7
   2   7   2 1149.85 77.8248   1
  -3  -7  -2 82.3486 9.35204   7
   3  -7   2 88.5868 8.03266   4
  -3  -7  -2 78.9798 8.16142   5
   3  -7   2 67.9746 8.24187   2
  -3  -7  -2 85.0816 8.41718   5
  -3  -7  -2 72.5136 8.88966   2
   3  -7   2 94.7198 8.28933   5
  -3  -7  -2 96.8592 8.75017   7
   3  -7   2 82.7185 9.53898   7
   3  -7   2 85.9140 6.83501   6
  -3   7  -2 97.8940 8.33048   1
  -3   7  -2 87.1517 6.57540   6
   3   7   2 92.2221 8.73875   7
   3   7   2 106.973 9.72801   3
   3   7   2 93.8223 8.62532   1
  -4  -7  -2 75.8832 8.14158   5
  -4  -7  -2 75.2717 7.44125   5
   4  -7   2 71.4725 7.23238   5
  -4  -7  -2 79.2937 7.50657   7
   4  -7   2 86.0920 9.11840   7
   4  -7   2 79.8814 6.71937   4
  -4  -7  -2 66.7786 7.92502   7
  -4  -7  -2 83.4222 9.15205   2
  -4   7  -2 83.4075 6.16499   6
   4   7   2 89.9118 9.88405   3
  -4   7  -2 78.5591 5.98799   3
  -4   7  -2 77.8123 8.45186   7
  -4   7  -2 72.5388 7.52760   1
   4   7   2 71.0764 7.85021   7
  -5  -7  -2 7.42652 2.83322   5
  -5  -7  -2 3.78206 2.54131   5
  -5  -7  -2 4.14086 2.83579   7
  -5  -7  -2 5.34146 3.74689   2
  -5   7  -2 4.95213 1.95722   6
   5   7   2 13.4587 4.81342   3
  -5   7  -2 6.39514 3.52565   1
  -6  -7  -2 7.35125 4.12981   2
  -6  -7  -2 8.52720 2.70087   5
  -6  -7  -2 5.09819 2.33069   7
  -6  -7  -2 5.25535 2.61285   5
   6   7   2 7.27488 4.59284   3
  -6   7  -2 11.1837 3.81083   1
  -7  -7  -2 -1.1484 3.35358   2
  -7  -7  -2 5.45448 2.28554   5
  -7   7  -2 2.10526 2.95828   1
   7   7   2 6.69522 4.99058   3
  -8  -7  -2 73.8384 6.35090   5
  -8  -7  -2 84.4071 9.64711   2
   8   7   2 73.3742 9.84971   3
  -8   7  -2 76.4359 8.82802   1
  -9  -7  -2 1.96086 4.05300   6
  -9  -7  -2 3.96826 4.02211   2
  -9  -7  -2 4.83451 1.27917   5
  -9   7  -2 5.25917 3.63736   1
   9   7   2 2.68475 4.48173   3
  -9  -8   2 11.3623 4.98338   6
  -9  -8   2 5.85300 3.83943   2
  -9  -8   2 6.01878 2.07463   5
   9   8  -2 5.14294 4.56094   3
  -9   8   2 9.77948 4.06122   1
  -8  -8   2 44.2538 8.00275   6
  -8  -8   2 38.9695 6.67850   2
  -8  -8   2 42.8155 4.89917   5
  -8   8   2 51.3273 7.16600   1
   8   8  -2 45.7434 7.67081   3
  -7  -8   2 6.68718 4.36187   2
  -7  -8   2 15.4692 3.14655   7
  -7  -8   2 11.6148 3.12654   5
   7   8  -2 17.5310 5.43212   3
  -7   8   2 11.8241 4.74875   1
  -6  -8   2 38.4203 5.29953   5
  -6  -8   2 41.2147 5.48209   4
  -6  -8   2 32.7491 6.02417   2
  -6  -8   2 43.1603 5.39807   7
  -6   8   2 37.3854 4.80166   6
  -6   8   2 32.6586 5.98071   1
   6   8  -2 32.5126 6.75640   3
  -6   8   2 32.9930 5.12945   4
  -5  -8   2 35.1021 5.73356   2
   5  -8  -2 33.9239 5.37224   7
  -5  -8   2 22.0383 4.77057   5
  -5  -8   2 28.6425 4.94979   4
  -5  -8   2 26.5179 4.80785   7
  -5  -8   2 23.8839 4.53856   5
   5  -8  -2 22.9564 3.27948   4
  -5   8   2 29.1364 5.38748   1
   5   8  -2 23.6184 5.90651   3
  -5   8   2 27.7427 3.91354   6
  -5   8   2 20.6125 4.34208   4
  -5   8   2 19.7274 4.35903   7
   4  -8  -2 85.3883 8.13179   2
   4  -8  -2 96.4140 8.08905   4
  -4  -8   2 91.1983 8.63417   5
  -4  -8   2 95.4171 9.88494   2
  -4  -8   2 94.7653 8.72220   5
   4  -8  -2 95.7181 10.6693   5
   4  -8  -2 97.3013 9.17221   7
  -4  -8   2 89.1157 8.62891   4
  -4  -8   2 85.7535 9.64087   7
  -4   8   2 92.7526 9.81946   1
  -4   8   2 82.7769 8.27459   4
  -4   8   2 91.8558 9.01411   7
   4   8  -2 82.0256 10.1190   3
  -4   8   2 89.4554 7.61948   6
  -3  -8   2 35.0928 5.56339   5
  -3  -8   2 31.7351 5.40076   4
   3  -8  -2 40.9478 5.11839   2
   3  -8  -2 35.7221 6.10720   7
   3  -8  -2 29.1887 4.79858   4
  -3  -8   2 25.2256 4.96203   2
  -3  -8   2 27.5670 5.47112   7
  -3   8   2 18.3502 4.81781   7
  -3   8   2 26.0204 3.87036   6
   3   8  -2 23.9410 5.25804   3
  -3   8   2 20.5940 4.63995   4
  -3   8   2 24.3741 4.89042   1
   2  -8  -2 369.833 28.5155   7
  -2  -8   2 380.223 28.5745   7
  -2  -8   2 388.383 28.0489   5
   2  -8  -2 358.672 27.6179   4
  -2  -8   2 369.840 27.5954   2
   2  -8  -2 374.161 27.8610   5
  -2  -8   2 405.246 27.9963   4
   2  -8  -2 385.005 27.2122   2
  -2   8   2 397.479 27.6628   1
  -2   8   2 413.096 25.9486   3
  -2   8   2 385.919 28.3878   7
  -2   8   2 424.651 27.9432   4
  -2   8   2 406.048 26.7951   6
   2   8  -2 414.790 28.1868   1
   2   8  -2 394.334 27.7966   3
   1  -8  -2 61.4932 6.55629   2
  -1  -8   2 61.5749 8.03581   7
  -1  -8   2 51.1941 6.71897   2
  -1  -8   2 50.6543 6.86995   4
   1  -8  -2 57.7723 7.19276   4
   1  -8  -2 57.1416 7.41687   5
  -1  -8   2 61.7119 7.49992   5
   1  -8  -2 67.1624 8.59594   7
  -1   8   2 50.8557 4.89250   3
  -1   8   2 60.3769 6.32914   6
   1   8  -2 56.9764 6.42250   3
  -1   8   2 56.6592 6.88407   1
  -1   8   2 62.8285 7.80571   7
   1   8  -2 53.6257 6.92468   1
   0  -8  -2 22.6956 5.58804   7
   0  -8  -2 20.4662 4.49678   2
   0  -8   2 29.0110 5.03868   5
   0  -8  -2 10.3183 3.99727   5
   0  -8   2 22.0124 4.68357   4
   0  -8   2 21.1252 2.91703   3
   0  -8  -2 20.7700 4.73914   4
   0  -8   2 19.6526 4.20884   2
   0  -8   2 15.2402 4.87960   7
   0   8  -2 18.6247 3.24378   3
   0   8  -2 25.1207 4.74636   1
   0   8   2 23.8236 4.28166   6
   0   8   2 28.7891 4.60030   1
   0   8   2 23.8387 3.62268   3
   0   8   2 15.2361 4.81205   7
   1  -8   2 82.3804 8.84999   5
   1  -8   2 82.9395 8.90896   4
  -1  -8  -2 90.9641 9.35977   4
  -1  -8  -2 84.5887 9.11053   5
  -1  -8  -2 62.9269 9.00585   7
  -1  -8  -2 85.4516 8.67532   2
   1  -8   2 74.0747 8.19075   2
  -1  -8  -2 79.8427 8.69647   5
   1  -8   2 79.6753 9.66072   7
   1   8   2 89.7611 9.71664   7
  -1   8  -2 71.2775 8.55795   5
   1   8   2 89.7648 8.09087   1
  -1   8  -2 71.9541 8.10084   1
   1   8   2 77.8312 8.26131   3
  -2  -8  -2 158.314 13.4366   5
   2  -8   2 169.018 14.3487   7
   2  -8   2 172.997 13.5284   2
  -2  -8  -2 165.159 13.5517   5
  -2  -8  -2 162.432 14.0183   7
   2  -8   2 166.514 13.5964   5
   2  -8   2 176.143 13.4530   4
  -2  -8  -2 188.618 13.8793   2
  -2   8  -2 167.573 13.6668   5
  -2   8  -2 164.168 13.3009   1
   2   8   2 171.793 13.5160   3
   2   8   2 158.064 13.4161   1
  -2   8  -2 159.598 11.9186   6
   2   8   2 167.564 14.1562   7
  -3  -8  -2 23.6812 4.80345   2
   3  -8   2 18.2650 4.03575   4
  -3  -8  -2 19.7098 4.23420   5
  -3  -8  -2 15.8154 4.21298   7
  -3  -8  -2 23.3769 4.33170   5
   3  -8   2 10.8748 4.20333   7
   3  -8   2 22.9739 4.63877   2
   3   8   2 24.5921 5.02119   1
   3   8   2 18.0120 4.87192   3
  -3   8  -2 12.3211 3.88418   1
  -3   8  -2 18.2437 2.56849   6
   3   8   2 21.8897 4.87982   7
  -4  -8  -2 120.620 10.9239   2
   4  -8   2 102.971 10.3364   7
  -4  -8  -2 122.716 10.3515   5
   4  -8   2 114.404 10.4169   2
   4  -8   2 119.264 9.58017   4
  -4  -8  -2 130.122 10.7049   7
  -4  -8  -2 114.095 10.2402   5
  -4   8  -2 103.439 9.96980   1
   4   8   2 106.572 10.9638   3
   4   8   2 121.034 10.2795   7
  -4   8  -2 116.215 8.52066   6
  -5  -8  -2 49.4531 6.36633   7
  -5  -8  -2 45.9217 7.17568   2
  -5  -8  -2 57.7002 6.42655   5
  -5  -8  -2 49.7631 7.52973   5
  -5   8  -2 50.4709 4.70565   6
   5   8   2 58.3381 8.23676   3
  -5   8  -2 53.5806 6.83012   1
  -6  -8  -2 53.7159 6.11896   7
  -6  -8  -2 44.1817 5.68815   5
  -6  -8  -2 56.3550 7.86899   2
  -6   8  -2 50.1239 6.63150   1
   6   8   2 35.5748 7.17550   3
  -7  -8  -2 20.4354 3.60446   5
  -7  -8  -2 17.0429 4.95565   2
  -7   8  -2 24.4837 5.33970   1
   7   8   2 15.7743 5.73478   3
  -8  -8  -2 23.9500 5.53907   2
  -8  -8  -2 18.0170 3.19135   5
   8   8   2 16.3214 5.41119   3
  -8   8  -2 26.4179 5.43301   1
  -8  -9   2 9.46973 5.06805   6
  -8  -9   2 9.68507 2.85216   5
  -8  -9   2 13.0670 4.33210   2
  -8   9   2 11.8777 4.72700   1
   8   9  -2 8.48141 4.80907   3
  -7  -9   2 16.3625 3.42908   7
  -7  -9   2 6.40105 2.90975   5
  -7  -9   2 8.89149 4.31339   2
   7   9  -2 8.11887 4.95852   3
  -7   9   2 6.12140 4.02103   1
  -6  -9   2 47.9514 6.39457   4
  -6  -9   2 43.6032 7.18955   2
  -6  -9   2 61.3352 7.01803   5
  -6  -9   2 49.8266 6.72086   7
   6   9  -2 43.2152 7.78693   3
  -6   9   2 66.6150 7.78876   1
  -6   9   2 69.4401 7.25847   4
  -5  -9   2 17.7857 4.61845   2
  -5  -9   2 21.5927 4.69978   7
   5  -9  -2 21.8276 3.49172   4
  -5  -9   2 21.9226 4.59919   4
  -5  -9   2 26.2324 4.67466   5
  -5   9   2 25.0202 5.22636   1
   5   9  -2 21.6333 5.40815   3
  -5   9   2 19.2673 3.50902   6
  -5   9   2 22.1323 4.56207   4
  -4  -9   2 16.3458 4.50742   2
   4  -9  -2 11.8105 3.56337   2
   4  -9  -2 20.0943 3.90803   4
  -4  -9   2 10.3524 3.95410   7
   4  -9  -2 20.1741 4.82228   7
  -4  -9   2 19.1729 4.56821   5
  -4  -9   2 14.4557 4.30578   4
  -4   9   2 22.8326 4.52285   4
   4   9  -2 15.9230 5.31890   3
  -4   9   2 14.4824 3.14952   6
  -4   9   2 19.5607 4.50911   7
  -4   9   2 20.5694 4.73857   1
  -3  -9   2 8.94797 3.87502   5
   3  -9  -2 5.49738 3.25204   5
   3  -9  -2 6.81572 3.14815   2
  -3  -9   2 7.65948 4.42703   7
   3  -9  -2 7.42224 3.58899   4
  -3  -9   2 7.58362 3.73480   4
  -3  -9   2 9.18847 3.77077   2
  -3  -9   2 10.3767 3.48696   5
   3  -9  -2 11.9032 4.30645   7
  -3   9   2 9.69983 3.75877   4
   3   9  -2 9.98588 4.10312   1
  -3   9   2 7.16180 3.52872   1
  -3   9   2 4.88301 2.58359   6
  -3   9   2 6.06284 3.68685   7
   3   9  -2 2.59475 3.88189   3
   2  -9  -2 16.3070 4.75022   4
   2  -9  -2 22.8612 4.50327   2
   2  -9  -2 14.3955 4.46982   5
  -2  -9   2 17.9315 4.53893   4
  -2  -9   2 18.0006 4.59519   5
  -2  -9   2 15.0716 4.50093   5
  -2  -9   2 16.3843 5.03146   7
  -2  -9   2 20.3650 4.85014   2
   2  -9  -2 19.7801 5.29615   7
   2   9  -2 35.6623 5.52763   3
  -2   9   2 35.3889 5.52244   1
  -2   9   2 44.2315 4.74741   6
  -2   9   2 33.2966 3.02793   3
  -2   9   2 27.6715 5.67466   7
   2   9  -2 47.1974 6.38123   1
  -2   9   2 32.0942 5.54207   4
  -1  -9   2 19.5200 4.51154   2
  -1  -9   2 22.3026 4.87072   5
  -1  -9   2 30.6665 5.42646   5
  -1  -9   2 24.4801 5.00433   4
   1  -9  -2 26.6654 5.02211   4
   1  -9  -2 20.1894 5.10632   7
  -1  -9   2 14.9511 4.70460   7
   1  -9  -2 14.7532 4.29833   5
   1  -9  -2 19.0426 4.01559   2
  -1   9   2 22.2786 3.86926   6
  -1   9   2 27.2610 4.73935   1
  -1   9   2 19.2177 3.02141   3
  -1   9   2 23.5255 5.36237   7
   1   9  -2 15.0470 4.19749   1
   1   9  -2 24.3068 4.25900   3
   0  -9  -2 526.548 36.5252   4
   0  -9  -2 495.563 36.4967   5
   0  -9   2 526.255 37.3320   7
   0  -9  -2 530.717 37.3658   7
   0  -9   2 530.448 36.7205   5
   0  -9   2 498.765 36.0675   2
   0  -9   2 553.291 36.8277   4
   0  -9  -2 500.643 35.8950   2
   0   9  -2 541.974 34.9486   3
   0   9   2 507.951 36.0132   1
   0   9   2 523.891 35.7331   6
   0   9   2 522.498 35.2834   3
   0   9  -2 519.031 36.0805   1
   0   9   2 540.308 37.2407   7
  -1  -9  -2 50.8154 6.62405   5
   1  -9   2 46.3535 6.66068   5
   1  -9   2 45.8800 6.45479   4
   1  -9   2 51.3613 7.63174   7
  -1  -9  -2 40.5134 6.02845   2
   1  -9   2 44.1617 5.97278   2
  -1  -9  -2 49.5066 6.88882   5
  -1  -9  -2 42.9468 7.03747   7
  -1  -9  -2 49.3686 6.67365   4
   1   9   2 44.0813 5.82512   3
   1   9   2 37.2633 6.57323   7
   1   9   2 38.3508 5.88248   1
  -1   9  -2 29.1784 5.36939   1
  -2  -9  -2 46.1149 6.43193   5
  -2  -9  -2 43.6171 7.21576   7
   2  -9   2 34.4180 6.63576   7
   2  -9   2 36.6812 5.91954   2
   2  -9   2 35.5075 5.74292   4
  -2  -9  -2 35.5264 5.97225   2
   2  -9   2 37.3355 6.13723   5
  -2  -9  -2 42.0974 6.30799   4
  -2  -9  -2 41.5445 6.45505   5
  -2   9  -2 57.3134 4.81453   6
   2   9   2 44.2383 6.42194   3
   2   9   2 59.0479 7.05974   1
   2   9   2 47.9175 6.84130   7
  -2   9  -2 36.1433 5.86695   1
  -3  -9  -2 33.1593 5.42727   5
   3  -9   2 29.4481 5.35049   2
  -3  -9  -2 32.7240 5.44102   5
  -3  -9  -2 31.7150 6.06053   7
  -3  -9  -2 24.7967 5.21388   2
   3  -9   2 38.5468 6.47946   7
   3  -9   2 26.5979 4.92959   4
   3   9   2 40.7246 6.25323   1
   3   9   2 51.8721 6.59099   7
  -3   9  -2 32.2624 5.26221   1
  -3   9  -2 36.6487 3.86067   6
   3   9   2 34.3020 6.05799   3
   4  -9   2 304.804 20.3607   4
   4  -9   2 278.121 20.8417   2
   4  -9   2 285.683 21.7017   7
  -4  -9  -2 293.595 21.4650   7
  -4  -9  -2 281.910 20.9600   5
  -4  -9  -2 282.007 21.3569   2
   4   9   2 272.544 20.9530   7
   4   9   2 259.978 21.5218   3
  -4   9  -2 295.430 19.2283   6
  -4   9  -2 264.813 20.6351   1
  -5  -9  -2 10.3414 4.00443   7
  -5  -9  -2 9.96146 3.32115   5
  -5  -9  -2 9.25274 4.16911   2
  -5   9  -2 10.0648 3.78470   1
   5   9   2 3.28805 4.22569   3
  -6  -9  -2 16.9874 4.12020   7
  -6  -9  -2 19.7275 5.17835   2
  -6  -9  -2 20.7618 4.23430   4
  -6  -9  -2 18.6922 4.23615   5
  -6   9  -2 22.3204 4.78369   1
   6   9   2 20.2683 6.23203   3
  -7  -9  -2 4.75990 2.90643   7
  -7  -9  -2 3.05870 2.49219   5
  -7  -9  -2 7.04530 4.41227   2
   7   9   2 1.53572 4.20275   3
  -7   9  -2 5.47084 3.42602   1
  -8  -9  -2 2.61857 2.16634   5
  -8  -9  -2 3.00963 3.58649   2
   8   9   2 2.50051 4.09703   3
  -8   9  -2 10.5758 4.42407   1
  -8 -10   2 13.4133 5.00053   2
  -8 -10   2 13.7985 3.39392   5
  -8 -10   2 12.0396 5.63779   6
  -8  10   2 16.5827 4.98352   1
   8  10  -2 11.6279 5.27931   3
  -7 -10   2 6.74999 4.11324   2
  -7 -10   2 11.5365 3.45798   5
  -7 -10   2 10.6869 3.56798   7
   7  10  -2 12.2278 5.09075   3
  -7  10   2 6.35126 4.14857   1
  -6 -10   2 69.2754 7.88723   7
  -6 -10   2 50.8143 6.94118   5
  -6 -10   2 70.3723 7.92507   4
  -6 -10   2 70.8942 9.43546   2
  -6  10   2 63.0022 7.46481   4
   6  10  -2 75.3516 9.45562   3
  -6  10   2 62.2976 8.06423   1
  -5 -10   2 2.29117 3.46389   2
   5 -10  -2 7.83882 2.70492   4
  -5 -10   2 5.43755 3.45086   4
  -5 -10   2 0.28341 3.31451   7
  -5 -10   2 -4.3176 2.43601   5
   5  10  -2 1.19211 4.52553   3
  -5  10   2 4.63385 3.53849   1
  -5  10   2 7.75181 3.53214   4
  -5  10   2 5.34550 2.46574   6
   4 -10  -2 214.320 17.7842   7
  -4 -10   2 224.924 17.3958   2
  -4 -10   2 235.513 17.4482   4
  -4 -10   2 219.566 17.4850   5
   4 -10  -2 239.065 16.8229   2
  -4 -10   2 203.113 17.4263   7
  -4  10   2 217.902 15.9073   6
  -4  10   2 227.028 17.4274   1
  -4  10   2 214.207 17.1841   4
   4  10  -2 207.944 17.6336   3
  -4  10   2 236.796 17.8881   7
  -3 -10   2 33.1800 5.64787   2
  -3 -10   2 37.1804 6.54863   7
   3 -10  -2 39.5986 5.46593   2
  -3 -10   2 28.3543 5.59821   5
  -3 -10   2 30.6421 5.60664   4
   3 -10  -2 36.6963 5.81547   4
   3 -10  -2 32.5992 6.10435   7
   3  10  -2 35.0932 6.29952   3
  -3  10   2 29.7763 2.82686   3
   3  10  -2 34.3236 6.12595   1
  -3  10   2 25.7470 4.16705   6
  -3  10   2 21.3149 5.25680   7
  -3  10   2 25.5634 5.06530   1
   2 -10  -2 33.2200 6.76520   7
  -2 -10   2 39.5015 6.04635   5
  -2 -10   2 28.9386 5.40852   2
   2 -10  -2 31.7223 4.90015   2
  -2 -10   2 32.0584 5.85428   4
   2 -10  -2 27.8883 5.30984   4
  -2 -10   2 41.4856 6.87832   7
  -2 -10   2 36.9973 5.84805   5
   2 -10  -2 25.3669 5.26811   5
  -2  10   2 22.2158 4.06949   6
  -2  10   2 25.7938 5.26223   1
  -2  10   2 22.9529 2.97011   3
  -2  10   2 19.7324 5.32767   7
   2  10  -2 27.4701 5.33119   1
   2  10  -2 30.6610 5.37199   3
   1 -10  -2 57.8029 6.91352   2
   1 -10  -2 59.7024 8.37449   7
  -1 -10   2 50.7613 6.95284   2
  -1 -10   2 60.5145 8.50705   7
  -1 -10   2 67.5628 7.96264   4
  -1 -10   2 67.1769 8.05472   5
   1 -10  -2 51.2312 7.18865   5
   1 -10  -2 48.5431 7.16601   4
  -1  10   2 55.1597 5.05963   3
   1  10  -2 54.5398 6.40300   3
  -1  10   2 51.1004 7.67508   7
  -1  10   2 43.6649 6.07702   6
  -1  10   2 50.3072 6.83264   1
   1  10  -2 43.5306 6.79866   1
   0 -10   2 234.005 18.5336   5
   0 -10   2 233.824 18.7635   4
   0 -10  -2 232.660 18.5046   4
   0 -10   2 233.404 18.0240   2
   0 -10  -2 234.418 19.2479   7
   0 -10  -2 241.607 18.7557   5
   0 -10  -2 246.541 18.0810   2
   0 -10   2 246.626 19.4467   7
   0  10   2 235.522 17.1289   3
   0  10   2 250.999 18.1291   1
   0  10  -2 230.038 16.7595   3
   0  10   2 228.587 18.8993   7
   0  10  -2 252.877 18.2937   1
   1 -10   2 26.6876 4.98127   2
   1 -10   2 21.5384 5.73781   7
  -1 -10  -2 26.8652 5.04897   2
  -1 -10  -2 34.4469 6.53564   7
   1 -10   2 26.3115 5.43248   5
  -1 -10  -2 27.2534 5.40144   4
   1 -10   2 22.4865 5.10103   4
  -1 -10  -2 25.9716 5.48302   5
   1  10   2 23.9587 4.36273   3
   1  10   2 27.7384 5.84576   7
   1  10   2 27.0678 4.95398   1
  -1  10  -2 32.4594 5.27816   1
  -2 -10  -2 35.4335 5.80168   5
  -2 -10  -2 32.4484 5.54115   5
   2 -10   2 29.7711 5.12679   2
   2 -10   2 30.9936 5.39671   4
   2 -10   2 22.2934 4.93655   5
  -2 -10  -2 24.9354 5.15546   2
  -2 -10  -2 46.9011 7.31580   7
   2 -10   2 28.2228 5.97560   7
  -2 -10  -2 23.3976 5.08529   4
  -2  10  -2 19.4639 4.69010   1
   2  10   2 17.1460 4.79201   1
   2  10   2 24.2663 5.18585   3
   2  10   2 19.2221 5.20759   7
  -3 -10  -2 75.6005 8.60526   2
  -3 -10  -2 52.1759 7.75000   7
   3 -10   2 58.3654 7.09242   4
   3 -10   2 65.4849 8.38909   7
   3 -10   2 52.8948 6.76121   2
  -3 -10  -2 56.1492 7.46171   5
  -3 -10  -2 57.4955 7.52055   4
   3  10   2 49.3055 7.27399   7
  -3  10  -2 47.0396 5.09687   6
  -3  10  -2 55.1677 7.01256   1
   3  10   2 57.6453 7.72447   3
   3  10   2 43.9892 6.91695   1
  -4 -10  -2 20.5507 4.75195   5
   4 -10   2 21.5774 4.43831   4
   4 -10   2 20.8057 5.17952   7
  -4 -10  -2 17.4561 4.81932   4
  -4 -10  -2 22.3441 5.32820   2
   4 -10   2 25.1316 5.43862   2
  -4 -10  -2 26.4668 5.24872   7
   4  10   2 36.6269 6.95314   3
   4  10   2 25.4558 5.05990   7
  -4  10  -2 24.9785 4.96846   1
  -5 -10  -2 8.50944 4.01081   7
  -5 -10  -2 12.9396 4.54463   2
  -5 -10  -2 12.8542 3.94996   4
  -5 -10  -2 13.8505 4.00524   5
  -5  10  -2 19.5718 4.39635   1
   5  10   2 17.5918 5.61524   3
  -6 -10  -2 127.591 11.1183   4
  -6 -10  -2 117.861 11.7785   2
  -6 -10  -2 132.259 11.2097   5
  -6 -10  -2 127.022 11.0375   7
  -6  10  -2 135.539 11.5393   1
   6  10   2 116.344 13.2302   3
  -7 -10  -2 -0.1601 2.53541   5
  -7 -10  -2 -1.7304 3.18580   2
  -7 -10  -2 3.11581 2.65132   7
   7  10   2 -1.4766 4.51845   3
  -7  10  -2 1.96484 3.73049   1
  -8 -10  -2 8.27467 4.61767   2
  -8 -10  -2 3.33090 2.41666   5
   8  10   2 9.25185 4.51322   3
  -8  10  -2 1.02840 3.47026   1
  -8 -11   2 5.23386 3.82929   2
  -8 -11   2 5.38195 4.61674   6
  -8 -11   2 -1.7171 2.64296   5
  -8  11   2 9.91818 4.26692   1
   8  11  -2 7.20275 4.77923   3
  -7 -11   2 5.09883 3.43674   7
  -7 -11   2 0.84476 2.57800   5
  -7 -11   2 6.68363 4.23959   2
   7  11  -2 12.8942 5.22863   3
  -7  11   2 2.37424 4.11077   1
  -6 -11   2 67.1846 8.90806   2
  -6 -11   2 77.2703 8.71636   4
  -6 -11   2 75.0077 8.36711   5
  -6 -11   2 84.1909 9.21295   7
  -6  11   2 77.3018 9.07774   1
   6  11  -2 77.9791 9.88474   3
  -5 -11   2 17.4736 4.60995   2
   5 -11  -2 12.4267 3.91525   2
  -5 -11   2 6.54712 3.48130   5
  -5 -11   2 21.0591 4.94873   7
  -5 -11   2 15.9208 4.26111   4
   5 -11  -2 11.7051 3.72139   4
  -5  11   2 12.7128 4.72153   1
   5  11  -2 2.92130 4.74189   3
  -4 -11   2 25.3740 5.32522   5
  -4 -11   2 22.3301 5.77868   7
  -4 -11   2 22.1773 5.14196   4
  -4 -11   2 26.3905 5.49950   2
   4 -11  -2 34.0513 6.61880   7
   4 -11  -2 36.2587 5.44339   4
   4 -11  -2 27.9111 4.93452   2
  -4  11   2 40.4418 4.62079   6
  -4  11   2 38.7417 6.47866   7
   4  11  -2 39.2944 6.78524   3
  -4  11   2 33.9487 5.91501   1
   3 -11  -2 43.9137 7.39171   7
   3 -11  -2 37.8428 6.41402   4
  -3 -11   2 39.5443 6.52489   5
  -3 -11   2 45.4710 7.08394   4
  -3 -11   2 45.9574 7.43725   7
   3 -11  -2 40.8893 6.02518   2
  -3 -11   2 41.8712 6.74302   2
  -3  11   2 35.4094 6.26601   1
   3  11  -2 48.1558 7.09604   3
   3  11  -2 56.9501 7.75437   1
  -3  11   2 42.8645 6.95014   7
  -3  11   2 48.0124 5.42388   6
   2 -11  -2 245.133 19.1169   2
  -2 -11   2 269.330 20.5305   5
   2 -11  -2 254.814 19.8451   4
   2 -11  -2 251.072 20.6731   7
   2 -11  -2 278.417 20.1384   5
  -2 -11   2 257.769 19.8539   2
  -2 -11   2 257.084 20.9583   7
  -2 -11   2 251.291 19.9534   4
  -2  11   2 247.423 18.8192   6
  -2  11   2 256.560 20.5205   7
   2  11  -2 286.955 20.3903   1
  -2  11   2 269.755 19.9171   1
  -2  11   2 263.637 17.6249   3
   2  11  -2 261.914 19.6269   3
  -1 -11   2 31.5883 5.74347   4
   1 -11  -2 27.6688 5.88489   5
  -1 -11   2 37.1437 6.06481   2
   1 -11  -2 34.9410 5.74888   4
   1 -11  -2 31.2326 6.22638   7
  -1 -11   2 32.2022 6.69739   7
   1 -11  -2 30.3541 5.09520   2
  -1 -11   2 32.0110 5.90576   5
  -1  11   2 27.9474 3.79194   3
  -1  11   2 24.2151 5.90513   7
  -1  11   2 38.2912 5.39032   6
   1  11  -2 30.2955 4.89382   3
   1  11  -2 41.0792 6.35428   1
  -1  11   2 25.8413 5.35600   1
   0 -11  -2 202.541 16.9600   2
   0 -11  -2 212.692 18.4382   7
   0 -11   2 242.040 18.0902   4
   0 -11   2 217.603 17.2019   2
   0 -11  -2 238.053 18.0493   4
   0 -11   2 235.942 18.0703   5
   0 -11   2 208.942 18.4387   7
   0 -11  -2 218.616 17.8490   5
   0  11  -2 230.267 17.3613   1
   0  11   2 206.607 18.0961   7
   0  11  -2 216.200 15.9002   3
   0  11   2 240.367 17.5963   1
   0  11   2 235.997 16.4593   3
  -1 -11  -2 33.0620 5.84664   4
  -1 -11  -2 36.9325 6.72415   7
   1 -11   2 31.8187 5.57313   4
   1 -11   2 31.3146 5.92497   5
   1 -11   2 33.5502 5.46791   2
  -1 -11  -2 28.6732 5.49641   5
   1 -11   2 20.4925 5.71209   7
  -1 -11  -2 23.9184 5.02743   2
   1  11   2 16.3874 5.34930   7
  -1  11  -2 20.6386 4.84137   1
   1  11   2 18.8975 4.31959   3
   1  11   2 24.5145 5.03250   1
   2 -11   2 30.6448 5.74392   4
  -2 -11  -2 43.0399 7.54525   7
  -2 -11  -2 41.2037 6.45291   2
   2 -11   2 51.9584 8.06712   7
   2 -11   2 38.9720 6.08621   2
  -2 -11  -2 44.1321 6.83850   5
   2 -11   2 58.8583 7.42764   5
  -2 -11  -2 36.0933 6.49132   4
   2  11   2 43.9272 6.84120   1
  -2  11  -2 43.1152 6.46851   1
   2  11   2 50.6451 6.85333   3
   2  11   2 42.2652 7.10308   7
  -3 -11  -2 15.9860 4.52078   4
  -3 -11  -2 17.0005 5.12508   7
   3 -11   2 5.23443 3.53847   2
  -3 -11  -2 11.4393 4.08751   5
  -3 -11  -2 7.54836 4.06796   2
   3 -11   2 10.3141 3.82286   4
   3 -11   2 6.25469 4.20723   7
  -3  11  -2 13.4081 4.34284   1
  -3  11  -2 7.82370 2.47641   6
   3  11   2 7.75698 4.52297   1
   3  11   2 6.35596 3.96716   7
   3  11   2 15.3155 4.61594   3
   4 -11   2 123.693 12.2254   7
   4 -11   2 121.919 10.4929   4
  -4 -11  -2 116.363 11.3388   5
  -4 -11  -2 126.201 11.9167   2
  -4 -11  -2 129.606 11.8344   7
   4 -11   2 126.033 11.0444   2
  -4 -11  -2 125.661 11.3842   4
   4  11   2 127.117 12.0809   7
  -4  11  -2 130.323 11.2692   1
   4  11   2 114.580 11.6381   3
  -5 -11  -2 11.6744 4.57424   7
  -5 -11  -2 13.5633 4.80157   2
  -5 -11  -2 13.1822 4.05429   5
  -5 -11  -2 10.0029 3.87791   4
   5  11   2 14.4782 4.97923   3
  -5  11  -2 20.0926 4.53530   1
  -6 -11  -2 15.1097 4.25448   7
  -6 -11  -2 21.9648 5.39225   2
  -6 -11  -2 16.7723 4.26950   5
  -6 -11  -2 26.2356 5.03096   4
   6  11   2 10.7533 5.12270   3
  -6  11  -2 16.2996 4.42933   1
  -7 -11  -2 14.0888 4.74077   2
  -7 -11  -2 9.36196 3.47927   5
  -7 -11  -2 16.6210 4.00696   7
  -7  11  -2 11.4952 4.55575   1
   7  11   2 7.04537 4.76363   3
  -8 -11  -2 2.59331 2.36585   5
  -8 -11  -2 0.75980 3.65148   2
  -8  11  -2 -1.2885 3.21949   1
   8  11   2 3.20922 4.33362   3
  -7 -12   2 12.9957 3.93234   7
  -7 -12   2 9.09411 3.37760   5
  -7 -12   2 5.69423 4.10070   2
   7  12  -2 18.7013 6.23806   3
  -7  12   2 3.35594 3.77030   1
  -6 -12   2 3.13030 4.23818   2
  -6 -12   2 5.96756 4.03033   7
  -6 -12   2 4.66892 3.37039   5
  -6 -12   2 10.6554 3.83811   4
   6  12  -2 9.77514 4.91796   3
  -6  12   2 8.05467 4.42816   1
  -5 -12   2 1.07855 3.67115   2
  -5 -12   2 -3.7270 2.74378   5
  -5 -12   2 0.49864 3.47581   4
  -5 -12   2 4.81707 3.97812   7
   5 -12  -2 0.45825 2.97792   2
   5  12  -2 1.13752 4.29018   3
  -5  12   2 -3.5736 3.17826   1
   4 -12  -2 9.29456 4.65723   7
   4 -12  -2 8.11158 3.79522   4
  -4 -12   2 18.3431 4.60862   5
  -4 -12   2 16.7393 4.73090   2
   4 -12  -2 9.79910 3.61463   2
  -4 -12   2 16.3764 4.58248   4
  -4 -12   2 13.2847 4.84189   7
   4  12  -2 18.8417 5.46328   3
  -4  12   2 11.5185 3.12944   6
  -4  12   2 10.9839 4.28743   7
  -4  12   2 8.09224 4.30887   1
  -3 -12   2 13.1072 4.39337   5
   3 -12  -2 11.1600 4.74185   7
  -3 -12   2 10.9347 4.56501   4
  -3 -12   2 11.1563 4.45377   2
  -3 -12   2 18.0253 5.16633   7
   3 -12  -2 24.7499 4.87595   4
   3 -12  -2 16.7346 4.06445   2
   3  12  -2 2.96644 4.05239   1
   3  12  -2 10.0238 4.24312   3
  -3  12   2 8.38445 4.27547   7
  -3  12   2 8.75148 4.41934   1
  -3  12   2 10.1337 3.26899   6
   2 -12  -2 18.9525 5.10485   4
   2 -12  -2 27.5265 6.20953   7
   2 -12  -2 31.5889 5.00215   2
  -2 -12   2 26.1514 5.93805   7
  -2 -12   2 27.2063 5.47544   4
  -2 -12   2 27.0203 5.62298   5
  -2 -12   2 15.9754 4.82539   2
  -2  12   2 15.2098 4.62870   1
  -2  12   2 28.4927 5.93416   7
   2  12  -2 16.7013 4.45786   3
  -2  12   2 15.7395 3.86290   6
   2  12  -2 22.7797 5.26697   1
   1 -12  -2 44.0924 6.62857   4
  -1 -12   2 36.9290 6.24754   2
   1 -12  -2 30.9237 6.69015   7
   1 -12  -2 31.9335 5.80804   5
   1 -12  -2 37.5459 6.08911   2
  -1 -12   2 42.9157 7.00937   5
  -1 -12   2 24.1545 6.43049   7
  -1 -12   2 32.7518 6.29609   4
   1  12  -2 37.8386 6.38442   1
  -1  12   2 30.0533 5.63067   1
  -1  12   2 31.0324 6.48112   7
   1  12  -2 36.5689 5.34377   3
  -1  12   2 36.0381 4.29251   3
   0 -12  -2 185.126 14.7604   2
   0 -12   2 177.085 15.3037   4
   0 -12  -2 163.307 15.8723   7
   0 -12   2 191.768 16.3846   7
   0 -12  -2 169.050 15.1668   4
   0 -12   2 176.534 14.8222   2
   0 -12   2 178.494 15.5085   5
   0 -12  -2 188.190 15.5687   5
   0  12   2 191.799 13.8469   3
   0  12  -2 183.302 14.8708   1
   0  12   2 172.780 14.8761   1
   0  12   2 178.214 15.7645   7
   0  12  -2 192.255 13.4425   3
  -1 -12  -2 21.1043 5.28027   4
   1 -12   2 21.1981 5.63563   7
   1 -12   2 25.9259 5.19521   2
   1 -12   2 11.8795 4.63535   4
   1 -12   2 16.8123 4.92877   5
  -1 -12  -2 15.5201 4.62372   2
  -1 -12  -2 13.8236 4.51255   5
  -1 -12  -2 22.9131 6.09459   7
   1  12   2 16.8902 4.57217   1
   1  12   2 21.0695 4.38872   3
   1  12   2 19.1067 5.40001   7
  -1  12  -2 16.7374 4.59164   1
   2 -12   2 92.6419 9.35619   2
  -2 -12  -2 80.5419 10.1016   7
  -2 -12  -2 91.1012 9.67999   5
   2 -12   2 78.0807 9.01833   4
  -2 -12  -2 81.3324 9.25154   2
   2 -12   2 78.7019 10.1176   7
  -2 -12  -2 75.5705 9.43649   4
   2  12   2 63.3434 9.07048   7
   2  12   2 62.5874 8.37065   3
  -2  12  -2 63.4551 8.35378   1
   2  12   2 64.5606 8.79506   1
  -3 -12  -2 68.3811 8.82977   2
   3 -12   2 80.9372 8.95549   2
  -3 -12  -2 74.7389 9.95226   7
   3 -12   2 79.7402 9.23180   4
   3 -12   2 84.4938 10.3637   7
  -3 -12  -2 69.7695 9.09571   5
  -3 -12  -2 76.2417 9.15273   4
   3  12   2 77.3025 9.40481   7
   3  12   2 87.3541 9.51673   3
  -3  12  -2 78.1599 9.20879   1
   3  12   2 82.3141 9.66986   1
   4 -12   2 29.2300 5.38252   2
  -4 -12  -2 26.2310 5.76144   2
  -4 -12  -2 27.4907 5.85561   7
   4 -12   2 34.8756 5.25099   4
   4 -12   2 20.3786 5.81033   7
  -4 -12  -2 17.5667 5.00725   5
  -4 -12  -2 28.8482 5.71534   4
   4  12   2 25.5599 6.11400   3
  -4  12  -2 28.0089 5.69091   1
  -5 -12  -2 6.92508 4.36576   7
  -5 -12  -2 15.1286 4.47682   5
  -5 -12  -2 13.6674 4.86558   2
  -5 -12  -2 22.2319 4.87116   4
  -5  12  -2 8.83047 4.31542   1
   5  12   2 18.2501 5.63376   3
  -6 -12  -2 9.52789 4.51970   2
  -6 -12  -2 17.5693 4.36807   5
  -6 -12  -2 13.8580 4.68155   7
  -6 -12  -2 19.7974 4.74236   4
   6  12   2 15.3764 5.32145   3
  -6  12  -2 17.8141 4.92396   1
  -7 -12  -2 -2.5898 2.49573   5
  -7 -12  -2 -3.4802 3.27060   2
  -7 -12  -2 -0.0038 2.81126   7
  -7  12  -2 0.10074 3.46368   1
   7  12   2 6.73052 4.63958   3
  -7 -13   2 2.34901 2.87274   5
  -7 -13   2 0.83115 3.38682   7
  -7 -13   2 -2.2184 3.44423   2
   7  13  -2 3.04383 4.73856   3
  -7  13   2 -0.0421 3.40901   1
  -6 -13   2 36.3129 5.94555   5
  -6 -13   2 27.9284 5.65508   4
  -6 -13   2 43.4450 6.85036   7
  -6 -13   2 40.8288 6.67246   2
  -6  13   2 40.6836 6.64308   1
   6  13  -2 36.9577 7.00146   3
  -5 -13   2 6.99744 3.96858   7
  -5 -13   2 0.73550 3.39647   4
  -5 -13   2 7.26634 4.16593   5
  -5 -13   2 3.42294 3.84543   2
   5 -13  -2 9.25554 3.81814   2
   5  13  -2 10.3953 4.70853   3
  -5  13   2 8.81182 4.16819   1
  -4 -13   2 2.66879 4.07466   7
  -4 -13   2 2.45197 3.86174   2
   4 -13  -2 3.43972 3.99249   7
   4 -13  -2 5.87072 3.55605   4
   4 -13  -2 4.97442 3.16268   2
  -4 -13   2 0.41226 3.52889   5
  -4 -13   2 0.09342 3.36832   4
   4  13  -2 4.03949 3.89470   3
  -4  13   2 3.31628 3.94773   1
   3 -13  -2 47.8104 7.83860   7
  -3 -13   2 37.1930 6.27516   2
  -3 -13   2 36.7871 6.90487   7
   3 -13  -2 51.5083 7.03837   4
   3 -13  -2 39.3514 6.03833   2
  -3 -13   2 41.4082 6.81562   5
  -3 -13   2 30.0819 6.02935   4
   3  13  -2 33.4497 6.49034   1
  -3  13   2 37.0088 5.04191   6
  -3  13   2 41.9600 7.10127   7
   3  13  -2 34.2644 6.06589   3
  -3  13   2 25.6513 5.94287   1
  -2 -13   2 7.78564 4.18905   4
   2 -13  -2 12.4918 5.31701   7
   2 -13  -2 7.66276 4.15541   4
  -2 -13   2 16.9180 4.81596   2
  -2 -13   2 12.5303 5.17807   7
   2 -13  -2 11.1487 3.82221   2
  -2 -13   2 5.64507 3.85025   5
   2  13  -2 7.04306 4.04587   1
  -2  13   2 17.3439 4.89733   1
  -2  13   2 9.95530 3.64762   6
  -2  13   2 6.24259 4.17223   7
   2  13  -2 8.99340 3.88538   3
  -1 -13   2 62.3037 9.20593   7
   1 -13  -2 62.1733 9.39162   5
  -1 -13   2 66.5244 8.79063   4
  -1 -13   2 61.0789 8.49807   5
   1 -13  -2 64.4772 9.46366   7
   1 -13  -2 56.0159 7.25814   2
   1 -13  -2 66.0095 8.44343   4
  -1 -13   2 66.2907 8.18189   2
  -1  13   2 59.7614 8.68127   7
   1  13  -2 51.3125 6.54369   3
   1  13  -2 46.4554 7.43019   1
  -1  13   2 52.7107 7.48053   1
   0 -13   2 129.353 11.2147   5
   0 -13  -2 90.5239 10.5370   2
   0 -13   2 102.253 11.4936   4
   0 -13  -2 108.628 11.5669   5
   0 -13  -2 109.468 11.6995   4
   0 -13   2 105.543 12.5216   7
   0 -13   2 99.0018 10.6364   2
   0 -13  -2 87.1181 11.7323   7
   0  13   2 96.5501 11.5683   7
   0  13  -2 98.2188 10.0727   1
   0  13   2 105.992 8.88936   3
   0  13   2 99.7995 10.0877   1
   1 -13   2 36.0418 6.16852   2
   1 -13   2 31.8905 6.26806   4
  -1 -13  -2 41.8191 7.14006   5
  -1 -13  -2 44.6442 6.45490   2
  -1 -13  -2 39.2596 6.82188   4
  -1 -13  -2 44.6637 7.63251   7
   1 -13   2 31.1073 6.93110   7
  -1  13  -2 34.6063 6.12896   1
   1  13   2 26.1128 5.68982   1
   1  13   2 35.8170 5.60459   3
   1  13   2 30.8935 6.67330   7
  -2 -13  -2 42.1039 6.57568   2
   2 -13   2 45.9636 8.18021   7
  -2 -13  -2 50.8899 7.50998   5
   2 -13   2 44.3250 6.70181   4
   2 -13   2 52.2621 7.02213   2
  -2 -13  -2 41.3097 7.83706   7
  -2 -13  -2 46.8005 7.40025   4
  -2  13  -2 35.8382 6.33407   1
   2  13   2 30.4314 5.89705   3
   2  13   2 36.6487 6.37199   1
   2  13   2 30.8247 6.58328   7
   3 -13   2 2.57294 3.58145   4
  -3 -13  -2 7.91170 4.33658   7
  -3 -13  -2 2.26065 3.44706   4
  -3 -13  -2 9.29427 4.19445   2
  -3 -13  -2 6.82820 3.96721   5
   3 -13   2 8.71965 3.69123   2
   3 -13   2 7.48986 4.76691   7
   3  13   2 3.16229 3.75816   7
   3  13   2 5.82663 4.11679   3
   3  13   2 -3.7519 3.73138   1
  -3  13  -2 1.06019 3.59053   1
   4 -13   2 53.4909 7.36964   4
  -4 -13  -2 50.9244 7.81984   2
  -4 -13  -2 60.9181 8.13870   5
  -4 -13  -2 71.5116 8.94065   7
  -4 -13  -2 68.1648 8.49323   4
   4 -13   2 49.8631 7.37302   2
  -4  13  -2 64.9970 8.22957   1
   4  13   2 75.5850 9.44136   3
  -5 -13  -2 11.7930 4.12159   4
  -5 -13  -2 13.7327 4.72056   2
  -5 -13  -2 12.7384 3.94204   5
   5 -13   2 5.89959 4.08383   2
  -5 -13  -2 15.3863 4.40805   7
   5  13   2 3.77887 4.32733   3
  -5  13  -2 9.78135 4.19244   1
  -6 -13  -2 26.3591 5.43737   7
  -6 -13  -2 19.2609 4.70693   5
  -6 -13  -2 18.2562 5.31400   2
  -6 -13  -2 23.9850 5.39789   4
  -6  13  -2 26.0558 5.59336   1
   6  13   2 21.4970 6.27653   3
  -7 -13  -2 -0.2938 3.18665   7
  -7 -13  -2 5.79243 4.72981   2
  -7 -13  -2 -1.6893 2.91126   5
  -7  13  -2 0.81361 3.59208   1
   7  13   2 2.41093 4.15477   3
  -6 -14   2 28.4318 6.01815   7
  -6 -14   2 20.0468 5.28399   2
  -6 -14   2 26.8227 5.54265   5
  -6 -14   2 52.3093 7.04966   4
  -6  14   2 34.5816 6.20758   1
   6  14  -2 29.5675 6.80317   3
  -5 -14   2 4.43544 3.95005   5
  -5 -14   2 3.90159 3.91580   7
  -5 -14   2 5.01393 4.68415   2
  -5 -14   2 9.27274 4.40212   4
  -5  14   2 5.82056 4.27693   1
   5  14  -2 11.9282 5.16664   3
   4 -14  -2 85.9193 9.65787   4
   4 -14  -2 98.6590 10.0144   2
  -4 -14   2 74.4417 9.93532   2
  -4 -14   2 103.566 11.5536   7
   4 -14  -2 89.5829 12.6210   7
  -4 -14   2 108.690 11.1241   5
  -4 -14   2 91.5095 10.5931   4
  -4  14   2 99.8589 10.8170   1
   4  14  -2 113.821 11.4040   3
   3 -14  -2 0.62223 3.93706   7
  -3 -14   2 -0.5841 3.40940   4
  -3 -14   2 4.07217 3.95300   2
   3 -14  -2 3.97693 3.77205   2
   3 -14  -2 6.76428 4.17676   4
  -3 -14   2 9.02607 4.34055   5
  -3 -14   2 7.77818 4.59968   7
  -3  14   2 1.20108 4.01016   7
   3  14  -2 4.70964 4.11517   3
  -3  14   2 12.1397 4.45933   1
   3  14  -2 5.26948 4.19006   1
   2 -14  -2 129.829 11.7490   2
  -2 -14   2 120.759 13.9079   7
  -2 -14   2 137.993 12.7283   4
   2 -14  -2 114.271 13.7649   7
  -2 -14   2 115.857 12.1196   5
  -2 -14   2 127.276 11.9237   2
   2 -14  -2 117.604 12.0186   4
  -2  14   2 150.559 13.2787   7
   2  14  -2 151.957 11.6043   3
  -2  14   2 133.627 12.1795   1
   2  14  -2 147.079 12.6279   1
  -1 -14   2 6.43221 4.00936   2
   1 -14  -2 4.07248 4.86657   7
   1 -14  -2 3.38634 3.87414   2
  -1 -14   2 7.33710 3.99882   5
   1 -14  -2 3.16707 3.80095   4
  -1 -14   2 5.63791 4.05112   4
  -1 -14   2 12.8419 5.68057   7
   1  14  -2 1.88144 3.63720   1
  -1  14   2 5.23216 3.84336   1
  -1  14   2 7.75677 4.51480   7
   0 -14   2 20.1655 6.30406   7
   0 -14   2 32.6173 6.36644   5
   0 -14   2 39.2516 7.27530   4
   0 -14  -2 30.4655 6.14716   4
   0 -14  -2 37.7865 6.60821   5
   0 -14   2 26.3886 5.70693   2
   0 -14  -2 51.7322 8.42147   7
   0 -14  -2 29.6481 5.75398   2
   0  14  -2 32.9879 6.10111   1
   0  14   2 42.3109 6.47132   1
   0  14   2 34.3554 7.05501   7
   1 -14   2 17.1811 4.87193   2
   1 -14   2 12.3647 4.50728   4
   1 -14   2 12.2848 5.55739   7
  -1 -14  -2 12.9629 4.75319   2
  -1 -14  -2 16.3638 4.99112   5
  -1 -14  -2 16.8388 4.87893   4
  -1 -14  -2 16.3372 5.70183   7
   1  14   2 12.2424 4.83086   7
   1  14   2 8.72494 4.25253   1
  -1  14  -2 6.08185 4.35269   1
   1  14   2 6.62321 3.54343   3
   2 -14   2 12.9271 4.41441   4
  -2 -14  -2 3.56224 4.34031   2
  -2 -14  -2 11.0734 4.52916   5
   2 -14   2 21.0426 4.77746   2
  -2 -14  -2 11.2926 5.08564   4
   2 -14   2 12.5887 5.46639   7
  -2 -14  -2 12.8171 5.40944   7
   2  14   2 29.1619 5.35072   3
   2  14   2 24.4867 5.45761   1
   2  14   2 25.2630 5.97633   7
  -2  14  -2 16.7685 5.00008   1
   3 -14   2 21.1826 6.13376   7
  -3 -14  -2 35.0619 6.24268   4
  -3 -14  -2 30.4330 5.85129   5
   3 -14   2 33.0724 6.03247   2
  -3 -14  -2 29.7375 5.84031   2
  -3 -14  -2 33.5240 7.09564   7
   3 -14   2 17.4912 4.71752   4
   3  14   2 18.5120 5.42701   3
   3  14   2 25.0389 5.80660   1
  -3  14  -2 16.1309 4.92429   1
   3  14   2 12.8448 4.99100   7
   4 -14   2 18.8922 4.78716   4
  -4 -14  -2 20.7713 6.14300   7
   4 -14   2 25.8447 5.46919   2
  -4 -14  -2 26.9443 5.59329   5
  -4 -14  -2 19.9181 5.10879   2
  -4 -14  -2 16.3116 4.90533   4
  -4  14  -2 19.2528 5.32869   1
   4  14   2 26.2438 6.00978   3
   4  14   2 17.1379 5.28929   1
  -5 -14  -2 5.70182 3.97114   4
  -5 -14  -2 5.08669 3.69324   7
  -5 -14  -2 1.36816 3.73574   2
   5 -14   2 6.83231 3.87009   2
  -5 -14  -2 2.13891 3.52865   5
  -5  14  -2 2.03158 3.77183   1
   5  14   2 3.12289 4.48249   3
  -6 -14  -2 21.2724 4.76689   5
  -6 -14  -2 21.1830 4.95789   4
  -6 -14  -2 19.4907 5.16706   2
  -6 -14  -2 24.2863 5.25935   7
   6  14   2 13.5338 5.51985   3
  -6  14  -2 23.5653 5.51673   1
  -6 -15   2 0.55108 3.82524   2
  -6 -15   2 1.25285 3.20853   5
  -6 -15   2 4.87786 4.17612   7
  -6 -15   2 3.94556 3.89716   4
  -6  15   2 -0.7235 3.81975   1
   6  15  -2 -0.5458 4.30434   3
  -5 -15   2 1.14540 3.42085   5
  -5 -15   2 0.27291 3.71781   4
  -5 -15   2 1.55053 4.42008   2
  -5 -15   2 8.12629 4.86664   7
   5  15  -2 5.16992 4.36135   3
  -5  15   2 5.37630 4.37592   1
  -4 -15   2 10.1738 4.38455   5
  -4 -15   2 3.96144 3.97760   2
   4 -15  -2 5.71927 3.74794   2
   4 -15  -2 1.30713 2.96176   4
  -4 -15   2 1.85143 3.77252   4
  -4 -15   2 5.46937 5.02691   7
   4  15  -2 3.79511 4.28295   3
  -4  15   2 1.22294 4.39930   1
  -3 -15   2 8.10257 4.21500   5
  -3 -15   2 5.32788 4.26943   4
   3 -15  -2 1.36037 3.46594   4
  -3 -15   2 15.1646 4.72678   2
  -3 -15   2 9.25468 4.99160   7
   3 -15  -2 4.78981 4.70258   7
   3 -15  -2 2.45002 3.45964   2
   3  15  -2 4.94916 3.94780   3
  -3  15   2 3.15395 4.06862   1
   3  15  -2 4.05756 4.26474   1
   2 -15  -2 17.4145 4.74885   4
   2 -15  -2 14.5613 4.62201   2
  -2 -15   2 11.1740 5.07947   5
  -2 -15   2 15.3497 5.11965   2
  -2 -15   2 11.5150 5.12356   4
  -2 -15   2 9.92139 5.09114   7
   2 -15  -2 12.5548 5.63468   7
  -2  15   2 12.9902 5.32853   7
   2  15  -2 18.7134 5.59302   1
  -2  15   2 18.3157 4.98795   1
  -1 -15   2 41.6945 7.00250   5
  -1 -15   2 31.1533 7.06252   7
   1 -15  -2 42.2100 7.19440   4
   1 -15  -2 49.3973 8.34461   7
  -1 -15   2 28.6772 6.14455   4
  -1 -15   2 33.2680 6.40152   2
   1 -15  -2 34.8547 5.96077   2
  -1  15   2 46.2664 7.01397   1
   1  15  -2 33.2782 6.33668   1
  -1  15   2 33.9285 7.41381   7
   0 -15   2 1.65803 4.35595   7
   0 -15   2 0.33671 3.57905   4
   0 -15  -2 -2.1133 3.22712   2
   0 -15  -2 3.13154 4.84322   7
   0 -15  -2 3.06831 4.09267   4
   0 -15   2 -2.4257 3.31783   2
   0  15  -2 -2.0731 3.28672   1
   0  15   2 -1.2683 4.33218   7
   0  15   2 -1.0144 3.42570   1
   1 -15   2 16.4824 4.98567   2
  -1 -15  -2 4.50049 3.99832   2
  -1 -15  -2 17.6757 5.01903   5
   1 -15   2 11.5745 5.40648   7
  -1 -15  -2 2.90409 4.22217   7
  -1 -15  -2 14.8709 5.09770   4
   1 -15   2 13.5385 4.68693   4
  -1  15  -2 10.3969 4.22273   1
   1  15   2 3.66140 4.52534   7
   1  15   2 3.69002 3.93407   1
   2 -15   2 65.6085 9.80299   7
   2 -15   2 70.6119 9.10114   4
  -2 -15  -2 69.6210 9.34710   5
  -2 -15  -2 83.9332 10.6044   7
  -2 -15  -2 65.5258 9.17930   4
  -2 -15  -2 72.8349 8.92931   2
   2 -15   2 66.3818 8.46887   2
   2  15   2 76.5319 9.60310   1
   2  15   2 76.4395 9.74208   7
   2  15   2 81.1408 9.04346   3
  -2  15  -2 65.6046 8.60981   1
  -3 -15  -2 1.97726 4.00573   2
   3 -15   2 7.40294 4.32106   4
   3 -15   2 1.74341 4.19109   7
  -3 -15  -2 4.11926 4.42065   7
  -3 -15  -2 2.99110 3.66917   4
   3 -15   2 -0.6951 3.60341   2
  -3 -15  -2 7.72083 4.01313   5
  -3  15  -2 4.22993 3.69342   1
   3  15   2 6.87008 3.88597   3
   3  15   2 4.72142 4.04535   1
  -4 -15  -2 1.73565 3.86145   7
  -4 -15  -2 3.98207 3.85754   5
   4 -15   2 4.78555 3.41880   4
   4 -15   2 5.44334 3.46844   2
  -4 -15  -2 5.06187 3.82227   4
  -4 -15  -2 -1.5507 3.52662   2
   4  15   2 1.67246 3.63010   1
  -4  15  -2 0.92274 3.74914   1
   4  15   2 1.16384 3.89745   3
  -5 -15  -2 10.8318 4.56951   4
  -5 -15  -2 9.43347 4.42864   2
   5 -15   2 12.2114 4.13655   2
  -5 -15  -2 8.94073 4.11903   5
  -5 -15  -2 8.92916 4.59034   7
  -5  15  -2 12.3937 5.03895   1
   5  15   2 8.25105 4.85704   3
  -5 -16   2 15.5950 5.39883   7
  -5 -16   2 6.33308 4.82038   2
  -5 -16   2 8.87099 4.74041   4
  -5 -16   2 8.99597 4.40576   5
  -5  16   2 4.96507 4.28322   1
   5  16  -2 4.89095 4.34650   3
  -4 -16   2 5.70882 4.49417   7
   4 -16  -2 0.40336 3.27803   4
  -4 -16   2 0.96919 3.58575   2
   4 -16  -2 1.44744 3.33343   2
  -4 -16   2 -2.2946 3.55000   4
  -4 -16   2 -0.7089 3.35572   5
   4  16  -2 1.18297 4.00026   3
  -4  16   2 -2.0700 3.74268   1
  -3 -16   2 -3.0696 3.44931   2
  -3 -16   2 4.01289 4.09633   5
  -3 -16   2 3.80509 4.01333   4
   3 -16  -2 1.64779 4.23120   7
   3 -16  -2 11.7175 4.29363   2
  -3 -16   2 3.08681 4.24749   7
   3 -16  -2 7.59799 3.92999   4
   3  16  -2 3.61572 4.27334   1
  -3  16   2 5.80929 4.25414   1
  -2 -16   2 84.5965 9.83407   2
   2 -16  -2 71.4513 10.7911   7
   2 -16  -2 63.2480 8.97731   2
   2 -16  -2 84.7542 10.2621   4
  -2 -16   2 89.1999 10.4964   5
  -2 -16   2 92.5187 10.3853   4
  -2 -16   2 100.319 12.1379   7
   2  16  -2 74.4659 9.80702   1
  -2  16   2 82.6488 9.77544   1
  -1 -16   2 8.91293 4.31541   2
   1 -16  -2 4.31496 4.48227   7
   1 -16  -2 8.19086 4.27694   4
  -1 -16   2 12.1254 5.44773   7
  -1 -16   2 7.38823 4.36567   4
   1 -16  -2 2.10307 3.65688   2
  -1  16   2 8.37383 4.30946   1
   1  16  -2 7.41000 4.17292   1
  -1  16   2 1.43998 4.04985   7
   0 -16   2 3.86996 4.06623   4
   0 -16  -2 -2.4529 4.18563   7
   0 -16  -2 -2.9628 3.69548   2
   0 -16   2 0.89670 4.22294   7
   0 -16   2 0.94498 3.89392   2
   0 -16  -2 2.92652 3.74581   4
   0  16  -2 5.87570 4.07412   1
   0  16   2 -1.8178 3.80700   7
   0  16   2 -1.0696 3.53522   1
   1 -16   2 14.5484 5.09170   4
   1 -16   2 16.0605 4.80800   2
  -1 -16  -2 14.5259 4.88475   2
  -1 -16  -2 17.0519 5.18136   4
  -1 -16  -2 19.5769 6.03254   7
   1 -16   2 14.8709 5.76142   7
  -1  16  -2 17.5599 5.17096   1
   1  16   2 20.1482 5.94401   7
   1  16   2 6.40353 4.47410   1
  -2 -16  -2 26.8519 5.99195   4
   2 -16   2 17.4972 6.17275   7
   2 -16   2 19.4868 5.19682   2
  -2 -16  -2 23.7293 5.62848   2
   2 -16   2 19.2905 5.11690   4
  -2 -16  -2 16.2344 5.11901   5
  -2 -16  -2 17.4438 6.07267   7
   2  16   2 31.5935 6.78955   1
  -2  16  -2 28.1709 5.88856   1
  -3 -16  -2 17.7044 5.30504   4
   3 -16   2 18.5755 5.82477   7
   3 -16   2 17.2581 4.95036   4
   3 -16   2 14.3619 4.89458   2
  -3 -16  -2 14.3450 4.85644   2
  -3 -16  -2 5.21058 4.15836   5
  -3 -16  -2 22.5750 5.85785   7
  -3  16  -2 19.4395 5.17439   1
   3  16   2 21.6323 5.57900   1
   3  16   2 12.5484 4.73763   3
   4 -16   2 6.14145 4.10807   4
  -4 -16  -2 13.5127 5.34425   7
  -4 -16  -2 8.19021 4.57264   4
   4 -16   2 17.1413 4.79701   2
  -4 -16  -2 12.9512 4.75255   5
  -4 -16  -2 12.3854 4.46704   2
   4  16   2 11.4729 4.91858   3
   4  16   2 14.5852 4.92535   1
  -4  16  -2 17.1155 4.95902   1
  -5 -16  -2 4.45894 4.17240   4
  -5 -16  -2 0.78521 3.91213   7
   5 -16   2 4.87228 3.39182   2
  -5 -16  -2 1.57137 4.09802   2
  -5 -16  -2 5.20124 3.51808   5
   5  16   2 0.91246 4.06925   3
  -5  16  -2 2.91169 3.98364   1
  -4 -17   2 27.5714 6.08917   4
  -4 -17   2 17.6048 5.46579   5
   4 -17  -2 21.6457 5.15253   4
  -4 -17   2 15.7942 4.90474   2
  -4 -17   2 15.7736 6.15265   7
  -4  17   2 26.4645 5.83539   1
   3 -17  -2 7.90427 4.40549   4
   3 -17  -2 14.1648 4.13013   2
  -3 -17   2 6.10017 4.43411   4
  -3 -17   2 4.47680 4.19253   5
   3 -17  -2 16.5683 5.53052   7
  -3 -17   2 14.7963 4.88965   2
  -3 -17   2 9.78377 5.10658   7
  -3  17   2 7.56784 4.21855   1
   3  17  -2 7.80487 4.63547   1
   2 -17  -2 9.71800 3.96850   2
  -2 -17   2 14.2846 4.87276   2
   2 -17  -2 18.1332 5.92555   7
  -2 -17   2 14.3138 5.61934   7
  -2 -17   2 27.8720 6.54664   4
   2 -17  -2 12.8539 5.24669   4
  -2  17   2 4.04456 4.21249   1
   2  17  -2 14.6793 4.89647   1
  -1 -17   2 36.5533 7.70011   7
  -1 -17   2 25.2679 6.50426   4
  -1 -17   2 27.8718 5.96068   2
   1 -17  -2 18.7138 5.46158   4
   1 -17  -2 23.9825 5.45349   2
   1 -17  -2 21.5453 6.66393   7
  -1  17   2 29.4040 5.89402   1
   1  17  -2 33.8393 6.43225   1
   0 -17  -2 6.35184 4.10937   2
   0 -17  -2 9.20452 4.30042   4
   0 -17   2 -0.0270 3.83124   4
   0 -17  -2 8.02929 4.78334   7
   0 -17   2 0.53894 3.91343   2
   0 -17   2 11.2446 5.18885   7
   0  17  -2 9.91522 4.38599   1
   0  17   2 11.2956 4.28737   1
  -1 -17  -2 13.1622 4.83299   4
  -1 -17  -2 3.84147 4.44883   2
  -1 -17  -2 19.8556 6.01119   7
   1 -17   2 8.92509 5.05817   7
   1 -17   2 3.41607 3.70295   4
   1 -17   2 10.6998 4.11129   2
   1  17   2 9.69763 4.34713   1
  -1  17  -2 11.9811 4.76652   1
   2 -17   2 66.5105 8.67031   2
   2 -17   2 48.6581 7.71273   4
  -2 -17  -2 57.1224 9.25112   7
  -2 -17  -2 49.7086 8.11380   4
  -2 -17  -2 48.9908 7.63389   2
  -2 -17  -2 60.5011 9.49998   5
   2 -17   2 55.0510 9.26716   7
  -2  17  -2 67.4466 8.51575   1
   2  17   2 54.1147 8.11296   1
  -3 -17  -2 5.32437 4.72550   7
   3 -17   2 8.26628 4.35909   4
  -3 -17  -2 13.9478 4.81978   5
  -3 -17  -2 13.5598 5.03900   4
  -3 -17  -2 7.73345 4.66865   2
   3 -17   2 5.82473 4.73495   7
   3 -17   2 11.7904 4.12404   2
   3  17   2 15.1114 4.97274   1
  -3  17  -2 11.5749 4.48216   1
  -4 -17  -2 19.4075 5.38936   5
   4 -17   2 18.8744 5.10762   2
  -4 -17  -2 18.7184 5.51813   4
  -4 -17  -2 14.2234 5.79473   7
  -4 -17  -2 10.9575 5.00317   2
  -4  17  -2 19.3607 5.03253   1
   4  17   2 16.1177 5.14433   1
   3 -18  -2 9.56860 3.99590   4
   3 -18  -2 8.48836 3.74596   2
  -3 -18   2 3.93985 4.35053   2
  -3 -18   2 10.9726 5.05975   7
   3 -18  -2 -0.2661 4.18280   7
  -3 -18   2 1.29089 4.02229   4
  -3  18   2 3.09823 4.14591   1
   3  18  -2 2.64568 4.07894   1
  -2 -18   2 57.6293 8.34594   4
   2 -18  -2 34.2476 6.47224   2
   2 -18  -2 34.2135 7.76090   7
  -2 -18   2 62.2469 9.55812   7
   2 -18  -2 54.6410 7.83778   4
  -2 -18   2 43.9919 7.18849   2
   2  18  -2 37.2978 7.04090   1
  -2  18   2 53.2391 7.65987   1
  -1 -18   2 3.46998 4.60891   7
   1 -18  -2 17.8774 6.12577   7
   1 -18  -2 4.70029 3.74916   2
   1 -18  -2 8.49515 4.47774   4
  -1 -18   2 6.23081 4.08594   2
  -1 -18   2 9.57804 4.64992   4
   1  18  -2 4.09678 4.12587   1
  -1  18   2 3.17923 4.51519   1
   0 -18   2 0.85609 3.72898   4
   0 -18  -2 -1.4573 4.07483   7
   0 -18   2 2.92258 3.92317   2
   0 -18   2 1.34893 4.87961   7
   0 -18  -2 -2.7865 3.72487   4
   0 -18  -2 -1.5074 3.35319   2
   0  18  -2 0.60469 4.05499   1
   0  18   2 5.56909 4.03093   1
   1 -18   2 23.6556 6.05421   2
  -1 -18  -2 24.0165 6.61047   7
   1 -18   2 23.7595 6.43423   7
   1 -18   2 22.5057 5.56439   4
  -1 -18  -2 22.1553 5.33107   2
  -1 -18  -2 16.5735 5.44680   4
  -1  18  -2 22.7366 5.22154   1
   1  18   2 24.5824 5.53067   1
  -2 -18  -2 8.41434 4.26317   4
  -2 -18  -2 4.80480 4.49931   7
  -2 -18  -2 -5.1101 3.46666   2
   2 -18   2 3.49912 4.20863   2
   2 -18   2 3.77327 4.78772   7
   2 -18   2 3.03475 3.88943   4
   2  18   2 4.40753 3.75125   1
  -2  18  -2 2.21514 3.80720   1
 -10   0   3 -3.5489 3.82754   1
 -10   0   3 4.69920 3.70870   6
  -9   0   3 -0.9739 3.23570   1
  -9   0   3 -0.1655 3.04939   6
  -8   0   3 18.2210 5.08707   1
  -8   0   3 15.7974 3.95862   2
  -8   0   3 22.3137 5.40142   6
  -7   0   3 36.9029 6.50112   1
  -7   0   3 35.1364 5.42255   2
  -7   0   3 30.4509 5.80498   6
  -6   0   3 11.6108 3.78732   6
  -6   0   3 -2.9933 3.28349   1
  -6   0   3 6.57694 1.31037   5
   6   0  -3 11.1198 4.13827   3
  -6   0   3 5.94817 2.93274   2
  -6   0   3 5.40791 1.29110   4
  -5   0   3 7.87548 3.86253   6
  -5   0   3 8.72683 1.59643   5
  -5   0   3 8.44603 1.38566   4
   5   0  -3 5.35445 3.62276   3
  -5   0   3 5.41014 3.62295   1
  -5   0   3 8.58551 2.77951   2
  -4   0   3 569.611 38.7949   2
  -4   0   3 600.801 40.1651   1
  -4   0   3 581.087 39.5610   6
   4   0  -3 554.205 39.5507   3
  -4   0   3 580.249 37.6253   7
  -4   0   3 575.479 37.6023   4
  -4   0   3 583.969 37.9785   5
   3   0  -3 59.3842 6.71832   3
  -3   0   3 56.6532 4.82307   7
  -3   0   3 55.3054 7.14597   1
  -3   0   3 58.0009 4.39526   4
  -3   0   3 60.1217 6.60239   6
  -3   0   3 60.5657 4.93045   5
  -3   0   3 51.7498 5.30162   2
  -2   0   3 8775.35 603.196   4
  -2   0   3 9999.99 603.293   5
  -2   0   3 9893.54 602.801   2
  -2   0   3 9346.75 602.563   6
  -2   0   3 9120.43 602.434   3
   2   0  -3 9292.80 602.089   5
   2   0  -3 9186.82 602.738   7
   2   0  -3 9465.39 602.357   2
  -2   0   3 9364.11 602.853   7
   2   0  -3 9132.89 602.532   6
  -1   0   3 222.093 14.9660   4
  -1   0   3 231.820 15.1644   5
   1   0  -3 208.323 14.4869   2
   1   0  -3 222.316 15.2573   6
   1   0  -3 228.810 15.0965   5
  -1   0   3 224.537 15.2343   6
   1   0  -3 211.243 15.1834   7
  -1   0   3 220.818 14.4814   2
   1   0  -3 217.485 14.8950   4
  -1   0   3 232.193 15.3828   7
   0   0   3 0.68947 0.77383   5
   0   0   3 -0.3168 0.84589   7
   0   0   3 0.01461 0.50672   6
   0   0  -3 -0.0889 1.24328   4
   0   0  -3 -0.2771 0.80983   6
   0   0  -3 -1.2751 1.23478   5
   0   0  -3 0.45249 1.43183   7
   0   0   3 0.75974 0.94486   4
   1   0   3 247.546 17.1205   3
  -1   0  -3 257.829 17.0718   3
  -1   0  -3 248.729 17.0941   7
   1   0   3 260.085 17.2350   7
   1   0   3 247.484 16.6812   4
  -1   0  -3 244.581 16.7829   6
  -1   0  -3 253.294 16.6571   1
  -1   0  -3 251.360 16.8150   4
   1   0   3 249.820 16.9284   5
  -1   0  -3 260.045 17.0248   5
   2   0   3 583.894 39.8114   3
  -2   0  -3 609.738 39.1045   7
  -2   0  -3 617.097 39.1344   5
  -2   0  -3 578.092 39.5475   1
   2   0   3 597.780 38.9317   5
  -2   0  -3 580.516 39.6839   3
  -2   0  -3 608.632 38.7161   4
  -3   0  -3 191.224 13.9176   1
   3   0   3 179.461 14.0553   3
  -3   0  -3 189.094 12.5382   5
   3   0   3 182.969 12.6634   7
  -3   0  -3 182.112 12.1957   7
  -4   0  -3 222.130 17.1354   1
  -4   0  -3 237.948 15.2987   5
   4   0   3 226.054 15.2822   7
   4   0   3 232.766 17.5984   3
  -5   0  -3 7.25738 3.24888   1
  -5   0  -3 10.1172 3.24338   6
   5   0   3 10.6448 4.05432   3
  -6   0  -3 9.46590 4.40451   6
  -6   0  -3 11.4370 4.46601   1
   6   0   3 9.77853 4.90863   3
  -6   0  -3 14.1265 4.88111   2
   7   0   3 5.21383 4.23191   3
  -7   0  -3 -2.2140 2.71877   2
  -7   0  -3 3.43812 3.15556   1
  -7   0  -3 -0.4689 2.80639   6
  -8   0  -3 44.8332 6.74149   1
  -8   0  -3 50.5357 7.07615   6
  -8   0  -3 50.1235 7.24967   2
   8   0   3 61.8887 8.24883   3
   9   0   3 13.2412 4.94634   3
  -9   0  -3 13.8466 4.62528   1
  -9   0  -3 10.3402 4.25152   2
  -9   0  -3 14.2263 4.31815   6
 -10  -1   3 8.19818 4.33977   1
 -10  -1   3 3.31965 3.50313   6
 -10   1   3 4.48014 3.91566   1
 -10   1   3 -0.9426 3.49937   6
  -9  -1   3 2.52287 3.48543   1
  -9  -1   3 -0.6951 3.68757   6
  -9   1   3 0.22234 3.38633   1
  -9   1   3 -1.8196 2.94888   6
  -8  -1   3 1.00622 2.86094   2
  -8  -1   3 2.83845 3.58294   1
  -8  -1   3 3.40670 3.53532   6
  -8   1   3 6.11348 3.67960   6
  -8   1   3 6.50985 3.19293   2
  -8   1   3 5.66128 3.88051   1
  -7  -1   3 17.1143 4.04133   2
  -7  -1   3 29.7680 6.62729   1
  -7  -1   3 16.0982 4.82560   6
  -7   1   3 32.5137 4.90734   2
  -7   1   3 31.9986 5.97153   1
   7   1  -3 41.2268 6.90224   3
  -7   1   3 29.5906 5.48197   6
  -6  -1   3 136.802 9.26912   5
  -6  -1   3 133.619 11.9596   6
  -6  -1   3 138.994 12.8318   1
  -6  -1   3 137.033 9.25511   4
  -6  -1   3 115.206 10.8021   2
   6   1  -3 142.261 12.2464   3
  -6   1   3 125.335 11.4053   6
  -6   1   3 138.009 9.44041   4
  -6   1   3 126.803 12.4298   1
  -6   1   3 137.359 9.39753   5
  -6   1   3 126.418 10.8650   2
  -5  -1   3 3.42358 1.26493   5
  -5  -1   3 0.16455 2.88581   6
  -5  -1   3 3.53140 1.12414   4
  -5  -1   3 2.62971 2.53156   2
  -5   1   3 -0.6070 3.03747   1
  -5   1   3 2.58624 1.24283   4
  -5   1   3 3.25363 1.46659   5
  -5   1   3 1.77173 2.24906   2
  -5   1   3 -4.0147 2.33106   6
   5   1  -3 3.58030 4.08108   3
  -4  -1   3 44.8275 6.45035   6
  -4  -1   3 43.2199 4.09273   4
  -4  -1   3 42.7403 4.42248   5
  -4  -1   3 39.2465 4.09859   7
  -4  -1   3 38.8737 5.38681   2
  -4   1   3 63.6606 4.35160   4
  -4   1   3 66.4562 4.48817   7
   4   1  -3 61.5863 7.37531   3
  -4   1   3 65.2840 7.65175   1
  -4   1   3 66.8373 4.75979   5
  -4   1   3 75.2962 7.32962   6
  -4   1   3 67.5265 5.51373   2
  -3  -1   3 18.3038 4.05387   6
  -3  -1   3 15.5697 2.83346   2
  -3  -1   3 15.9272 2.38363   5
  -3  -1   3 14.1810 2.00574   4
  -3  -1   3 18.2142 2.64914   7
  -3   1   3 14.0680 4.01506   1
  -3   1   3 16.5221 2.64966   7
  -3   1   3 17.6262 3.51368   6
   3   1  -3 9.35512 3.19276   2
   3   1  -3 15.5502 4.18310   3
  -3   1   3 10.9501 2.24667   5
  -3   1   3 13.5003 2.11585   4
  -2  -1   3 2386.82 156.210   2
  -2  -1   3 2448.70 156.196   5
  -2  -1   3 2396.26 156.320   7
   2  -1  -3 2376.37 156.670   6
   2  -1  -3 2324.82 156.328   7
   2  -1  -3 2413.39 155.817   4
  -2  -1   3 2391.01 156.019   4
  -2  -1   3 2406.10 156.940   6
  -2   1   3 2369.76 156.312   7
  -2   1   3 2458.40 157.131   1
   2   1  -3 2399.75 155.708   4
   2   1  -3 2428.73 156.285   2
  -2   1   3 2445.10 156.296   5
  -2   1   3 2562.40 156.744   6
  -2   1   3 2402.02 156.080   4
   2   1  -3 2457.52 156.349   7
   2   1  -3 2448.17 156.953   3
  -1  -1   3 26.7884 3.12632   4
  -1  -1   3 27.3845 3.43430   7
   1  -1  -3 33.0794 3.45664   6
  -1  -1   3 29.2920 3.40988   6
  -1  -1   3 24.6511 3.08105   5
   1  -1  -3 28.7895 3.33597   5
   1  -1  -3 31.3684 3.29133   4
   1  -1  -3 29.1800 3.68197   1
  -1  -1   3 29.5056 2.81643   2
   1  -1  -3 29.0443 3.48695   7
  -1   1   3 29.5646 3.60945   1
  -1   1   3 35.0378 3.51884   4
   1   1  -3 24.8829 3.38977   7
  -1   1   3 25.5424 3.32598   7
   1   1  -3 23.7487 3.19130   5
  -1   1   3 22.8169 3.11052   5
  -1   1   3 29.0068 3.26698   6
   1   1  -3 25.0654 3.06268   4
   1   1  -3 31.8433 2.87673   2
   1   1  -3 27.9569 3.56286   6
   0  -1  -3 117.213 8.35967   7
   0  -1   3 104.767 7.81570   2
   0  -1  -3 114.148 8.17253   5
   0  -1  -3 109.757 7.81432   6
   0  -1   3 106.242 7.96327   4
   0  -1   3 115.326 7.62362   1
   0  -1  -3 101.406 7.61558   1
   0   1  -3 110.721 8.34562   7
   0   1   3 110.978 7.98541   4
   0   1  -3 113.003 8.01993   4
   0   1  -3 112.169 7.67946   1
   0   1  -3 112.321 8.13420   5
   0   1  -3 106.418 7.85865   2
   0   1   3 111.952 7.79165   6
   0   1  -3 118.707 7.64420   6
   1  -1   3 59.3425 4.62872   1
   1  -1   3 57.7293 5.25251   7
   1  -1   3 60.5012 4.99394   5
   1  -1   3 57.3610 4.80744   4
  -1  -1  -3 58.2277 5.07758   5
  -1  -1  -3 52.3650 5.24533   7
   1  -1   3 63.4812 4.84683   3
  -1  -1  -3 60.7965 4.54367   1
  -1  -1  -3 62.6318 4.86952   4
  -1  -1  -3 59.2881 5.01700   6
  -1  -1  -3 63.2668 5.36164   3
  -1   1  -3 64.4414 4.54702   1
  -1   1  -3 57.0128 4.29001   6
  -1   1  -3 64.5471 4.70614   3
  -1   1  -3 64.0051 5.13799   5
   1   1   3 60.0075 4.67978   4
   1   1   3 62.7593 5.29154   7
  -1   1  -3 55.7130 5.31128   7
   1   1   3 61.4753 5.29840   3
  -1   1  -3 60.0844 4.96899   4
   1   1   3 55.0009 4.93430   5
   1   1   3 61.4197 5.09338   6
   2  -1   3 1770.38 114.743   3
  -2  -1  -3 1730.61 113.849   4
   2  -1   3 1736.62 114.115   5
  -2  -1  -3 1746.02 114.226   7
   2  -1   3 1758.12 114.626   1
  -2  -1  -3 1770.90 114.197   5
  -2   1  -3 1740.24 114.472   3
  -2   1  -3 1810.57 114.038   4
   2   1   3 1683.83 114.909   3
  -2   1  -3 1767.84 114.518   1
  -2   1  -3 1779.06 114.264   7
   2   1   3 1792.30 114.063   5
  -2   1  -3 1865.35 114.253   5
  -3  -1  -3 142.713 10.5849   5
  -3  -1  -3 145.109 10.3960   7
  -3  -1  -3 148.031 12.3848   2
  -3  -1  -3 143.800 10.3719   7
   3  -1   3 134.099 11.8610   3
   3  -1   3 146.168 11.1441   7
  -3   1  -3 171.143 10.2877   4
  -3   1  -3 161.891 10.7432   5
   3   1   3 161.391 10.7082   7
  -3   1  -3 159.585 10.3144   4
   3   1   3 149.783 12.1543   3
  -3   1  -3 164.848 11.8902   1
  -3   1  -3 155.889 10.5842   7
   4  -1   3 1063.13 69.1869   7
  -4  -1  -3 1045.73 69.0346   5
  -4  -1  -3 1061.50 71.0691   2
   4  -1   3 1082.98 70.9346   3
  -4   1  -3 1054.25 68.7275   4
  -4   1  -3 1093.24 68.7692   4
  -4   1  -3 1069.88 69.1398   5
  -4   1  -3 1056.74 70.6774   1
   4   1   3 1085.98 68.9391   7
   4   1   3 1043.19 71.0979   3
  -4   1  -3 1066.73 70.3927   6
  -5  -1  -3 11.1718 3.83340   2
   5  -1   3 12.6216 1.50749   7
   5  -1   3 16.3762 4.52959   3
  -5  -1  -3 11.6407 3.84830   1
   5   1   3 13.4151 4.78595   3
  -5   1  -3 12.3765 3.64940   1
  -5   1  -3 11.7755 1.62032   5
  -5   1  -3 15.7260 3.62515   6
  -6  -1  -3 140.178 11.6557   6
  -6  -1  -3 138.180 11.7154   2
   6  -1   3 144.470 12.0203   3
  -6  -1  -3 135.303 11.4876   1
  -6   1  -3 118.914 11.0645   6
  -6   1  -3 111.919 11.0235   1
   6   1   3 125.160 11.7604   3
  -7  -1  -3 2.23430 3.21700   1
  -7  -1  -3 8.15753 3.61821   6
  -7  -1  -3 5.98918 3.66400   2
   7  -1   3 7.34107 4.11054   3
  -7   1  -3 8.85341 3.50929   1
   7   1   3 9.95017 4.81025   3
  -7   1  -3 6.76745 3.84824   2
  -7   1  -3 3.25034 3.36298   6
  -8  -1  -3 15.0616 4.33610   6
  -8  -1  -3 28.5004 5.52074   2
   8  -1   3 15.2902 5.37669   3
  -8  -1  -3 20.2105 4.87928   1
  -8   1  -3 20.3193 4.62941   6
  -8   1  -3 18.6146 5.16798   2
  -8   1  -3 19.7232 4.77653   1
   8   1   3 19.8452 5.48722   3
  -9  -1  -3 2.05609 3.43808   6
  -9  -1  -3 -2.2134 3.15479   1
  -9  -1  -3 1.74889 3.45771   2
   9  -1   3 0.94677 4.02869   3
  -9   1  -3 1.11349 3.03649   1
   9   1   3 2.28986 3.96568   3
  -9   1  -3 4.33291 3.09131   2
 -10  -2   3 7.88891 4.27354   6
 -10  -2   3 1.43993 3.80467   1
 -10   2   3 2.86199 3.59268   1
  -9  -2   3 2.18875 3.69586   6
  -9  -2   3 1.16368 2.83509   2
  -9  -2   3 3.94813 3.53208   1
  -9   2   3 1.78809 3.02907   6
  -9   2   3 4.49870 3.93619   1
  -8  -2   3 58.2009 8.74989   1
  -8  -2   3 60.1084 7.48550   2
  -8  -2   3 57.9159 8.54475   6
  -8   2   3 74.0788 9.41180   1
  -8   2   3 71.5946 7.77175   2
  -8   2   3 58.9582 7.74393   6
   8   2  -3 66.4200 9.27407   3
  -7  -2   3 9.86505 3.61033   2
  -7  -2   3 6.55223 1.11474   5
  -7  -2   3 6.48645 1.05923   5
  -7  -2   3 9.53594 4.43389   1
  -7  -2   3 3.75628 3.83714   6
   7   2  -3 4.26693 4.37845   3
  -7   2   3 5.12000 3.90022   1
  -7   2   3 7.62431 3.52984   6
  -7   2   3 2.14082 2.77455   2
  -6  -2   3 32.9931 3.36093   5
  -6  -2   3 26.7813 5.13175   2
  -6  -2   3 38.5285 6.63884   6
  -6  -2   3 39.9412 3.56895   4
   6   2  -3 41.5326 6.70344   3
  -6   2   3 39.0353 3.75312   4
  -6   2   3 44.8088 6.37884   6
  -6   2   3 38.4354 3.84907   5
  -6   2   3 34.6116 6.31818   1
  -6   2   3 47.0750 5.75972   2
  -5  -2   3 12.8249 4.22659   6
   5  -2  -3 10.9486 2.24397   7
  -5  -2   3 10.5746 1.97226   5
  -5  -2   3 11.4380 3.36280   2
  -5  -2   3 9.43618 1.68844   4
  -5   2   3 9.74864 3.83565   1
  -5   2   3 10.3714 2.05453   4
   5   2  -3 6.00864 3.92729   3
  -5   2   3 6.85924 1.99011   5
  -5   2   3 8.25754 1.59650   7
  -5   2   3 14.0774 3.60431   6
  -4  -2   3 390.203 24.1826   7
  -4  -2   3 395.660 24.0239   7
  -4  -2   3 394.574 24.2552   5
  -4  -2   3 394.085 25.1546   2
  -4  -2   3 371.963 26.0206   6
  -4  -2   3 389.728 23.9870   4
  -4   2   3 334.963 24.1173   4
  -4   2   3 329.153 24.1349   7
  -4   2   3 323.853 25.0833   6
  -4   2   3 333.525 24.2633   5
   4   2  -3 314.875 25.7612   3
  -4   2   3 319.741 25.7286   1
  -3  -2   3 54.9143 5.44809   7
  -3  -2   3 69.8810 5.44214   5
  -3  -2   3 56.6912 5.02469   4
  -3  -2   3 59.9635 7.16559   6
  -3  -2   3 64.0236 5.94013   2
  -3   2   3 55.7753 7.08049   1
  -3   2   3 66.6178 5.71662   7
  -3   2   3 60.9601 5.41154   4
  -3   2   3 58.8260 5.54214   5
   3   2  -3 63.9080 7.45154   3
  -3   2   3 65.6427 6.06182   6
   2  -2  -3 174.204 15.7952   6
   2  -2  -3 191.225 15.3825   4
  -2  -2   3 193.036 15.7058   2
  -2  -2   3 182.928 15.5336   5
  -2  -2   3 173.301 16.1475   6
  -2  -2   3 190.534 15.8812   7
   2  -2  -3 178.542 15.3114   4
  -2  -2   3 185.372 15.5013   4
  -2   2   3 249.360 15.8289   6
   2   2  -3 268.949 15.4061   4
  -2   2   3 254.162 15.7636   4
  -2   2   3 272.311 16.8005   1
   2   2  -3 265.446 16.0800   2
  -2   2   3 281.615 16.1217   5
  -2   2   3 268.779 16.1415   7
  -2   2   3 263.003 15.1546   2
   2   2  -3 254.291 16.4693   7
   2   2  -3 262.004 16.7867   3
  -1  -2   3 68.7859 6.20278   4
   1  -2  -3 78.2602 6.31616   5
   1  -2  -3 85.7472 6.37566   1
   1  -2  -3 66.4049 6.33495   7
   1  -2  -3 82.8163 6.13937   4
   1  -2  -3 65.8070 5.16608   2
   1  -2  -3 82.9311 5.95180   6
  -1  -2   3 62.4767 5.93401   5
  -1  -2   3 71.3845 6.48287   3
  -1  -2   3 71.7966 6.49964   7
  -1  -2   3 80.8596 6.35998   1
  -1  -2   3 66.7160 6.23261   6
  -1  -2   3 77.0596 6.13436   2
   1   2  -3 61.7896 5.93560   4
  -1   2   3 81.7828 5.91534   6
   1   2  -3 69.4280 5.79177   2
  -1   2   3 64.6833 5.18551   2
  -1   2   3 81.4329 6.41348   1
   1   2  -3 76.3175 6.78869   7
  -1   2   3 69.4592 6.42995   7
   1   2  -3 67.1578 6.16122   5
  -1   2   3 67.0017 6.14056   5
  -1   2   3 84.4288 6.44819   4
   0  -2   3 873.232 57.8864   2
   0  -2  -3 875.716 57.7438   6
   0  -2  -3 881.824 57.6982   1
   0  -2   3 893.515 58.0926   5
   0  -2   3 887.080 57.5441   6
   0  -2  -3 914.518 58.1282   5
   0  -2   3 888.943 58.0434   4
   0  -2  -3 913.343 58.0338   4
   0  -2  -3 898.345 57.8075   2
   0  -2  -3 880.926 58.2755   7
   0  -2   3 827.318 57.6353   1
   0  -2   3 858.911 58.3151   7
   0   2  -3 888.480 57.8920   2
   0   2   3 921.314 58.1520   5
   0   2  -3 899.646 57.7196   1
   0   2  -3 947.074 58.1746   5
   0   2   3 876.789 57.8127   6
   0   2  -3 894.079 58.3173   7
   0   2   3 862.349 57.6661   1
   0   2   3 873.326 57.7946   2
   0   2   3 885.296 58.3014   7
   0   2   3 869.606 57.9785   4
   0   2  -3 908.173 58.0684   4
  -1  -2  -3 153.296 11.8373   4
  -1  -2  -3 166.913 12.0314   3
   1  -2   3 168.747 11.9897   4
  -1  -2  -3 169.435 11.5736   1
   1  -2   3 166.595 11.2895   3
   1  -2   3 191.297 11.6833   1
   1  -2   3 175.798 12.2158   2
  -1  -2  -3 165.951 12.4023   2
  -1  -2  -3 170.692 12.0668   6
  -1  -2  -3 156.173 11.9895   5
   1  -2   3 152.659 12.2187   7
  -1  -2  -3 162.331 12.2571   7
  -1   2  -3 156.648 11.8663   4
   1   2   3 155.626 12.3271   2
  -1   2  -3 171.615 12.4233   7
  -1   2  -3 178.979 12.2039   2
   1   2   3 149.519 12.0224   3
   1   2   3 170.344 12.2601   7
   1   2   3 168.391 11.7771   4
   1   2   3 189.512 11.7558   1
  -1   2  -3 154.402 11.9158   5
   1   2   3 145.103 12.0796   5
   1   2   3 165.817 12.1156   6
  -1   2  -3 187.189 11.6313   1
   2  -2   3 883.647 63.8410   1
   2  -2   3 890.868 63.0622   4
  -2  -2  -3 910.587 63.3004   4
  -2  -2  -3 932.830 63.6917   7
   2  -2   3 886.531 63.6067   3
  -2  -2  -3 852.826 64.3221   2
  -2  -2  -3 903.531 63.5786   5
   2  -2   3 883.425 63.0860   4
  -2  -2  -3 864.152 63.5938   7
  -2  -2  -3 912.911 63.7204   1
   2  -2   3 922.168 63.6128   5
   2  -2   3 888.548 63.8143   7
  -2   2  -3 1108.01 63.7773   5
   2   2   3 1049.40 64.4485   3
   2   2   3 1083.78 63.7669   7
   2   2   3 1073.29 63.5249   5
  -2   2  -3 1066.56 63.5503   3
  -2   2  -3 1102.31 63.9329   7
  -2   2  -3 1119.98 63.3852   6
  -2   2  -3 1055.63 63.8142   1
  -2   2  -3 1091.64 63.5815   4
   3  -2   3 82.5621 6.99442   3
  -3  -2  -3 78.6236 8.13786   2
  -3  -2  -3 77.9701 5.91246   7
  -3  -2  -3 79.7055 5.78119   7
  -3  -2  -3 76.6680 5.82942   5
  -3   2  -3 58.1465 5.73218   5
  -3   2  -3 67.3752 6.08107   6
  -3   2  -3 66.7927 5.86624   7
  -3   2  -3 66.8778 6.49688   1
   3   2   3 74.0916 7.98206   3
  -3   2  -3 66.5723 5.57898   4
   4  -2   3 713.530 46.1497   7
   4  -2   3 710.494 47.3310   3
  -4  -2  -3 728.544 45.9026   5
  -4  -2  -3 676.973 47.6605   2
  -4   2  -3 701.264 45.7764   4
   4   2   3 696.051 47.8917   3
  -4   2  -3 707.302 45.7640   7
   4   2   3 709.621 45.7890   7
  -4   2  -3 724.788 45.7170   4
  -4   2  -3 683.893 45.9440   5
  -4   2  -3 652.799 46.4795   6
  -4   2  -3 692.880 47.1008   1
   5  -2   3 34.4157 3.36328   7
   5  -2   3 37.4866 5.84014   3
  -5  -2  -3 30.6530 2.78664   5
  -5  -2  -3 29.6866 2.72254   5
  -5  -2  -3 32.9937 5.61048   2
  -5   2  -3 25.3760 2.96729   5
  -5   2  -3 29.4001 2.77968   4
   5   2   3 25.4209 5.49156   3
  -5   2  -3 25.9858 4.82019   1
  -5   2  -3 25.6811 2.85628   4
  -5   2  -3 26.5128 4.40310   6
  -6  -2  -3 97.5361 10.9286   2
  -6  -2  -3 102.289 10.1045   1
   6  -2   3 95.6873 9.82829   3
  -6   2  -3 116.306 9.78689   1
  -6   2  -3 106.991 9.33251   6
   6   2   3 107.490 10.4717   3
  -7  -2  -3 10.4541 3.99904   6
   7  -2   3 10.5096 4.41410   3
  -7  -2  -3 -1.4037 3.08746   2
  -7  -2  -3 8.96116 3.85089   1
  -7   2  -3 12.3279 3.91518   1
  -7   2  -3 8.48820 3.26125   6
   7   2   3 8.64008 4.51882   3
   8  -2   3 27.5381 6.20679   3
  -8  -2  -3 31.9899 5.90065   2
  -8  -2  -3 23.7212 5.53304   1
  -8  -2  -3 28.7971 6.07084   6
  -8   2  -3 34.5325 5.34013   6
  -8   2  -3 38.0511 6.06509   2
   8   2   3 25.9361 6.24781   3
  -8   2  -3 32.3059 5.76903   1
  -9  -2  -3 7.38290 3.84848   1
   9  -2   3 3.49916 3.67654   3
  -9  -2  -3 5.14100 3.53855   2
  -9  -2  -3 2.30187 3.47579   6
   9   2   3 5.07037 4.84534   3
  -9   2  -3 2.19991 3.49537   1
  -9   2  -3 5.25040 3.66318   2
  -9  -3   3 0.46548 2.86381   2
  -9  -3   3 1.23110 3.82594   6
  -9  -3   3 0.21190 4.04492   1
  -9   3   3 1.25504 3.09489   6
  -9   3   3 1.64547 3.84138   1
  -8  -3   3 12.7693 4.83752   1
  -8  -3   3 19.9394 5.16475   6
  -8  -3   3 13.8389 3.87245   2
  -8   3   3 15.5925 4.58251   1
  -8   3   3 10.6666 3.72098   6
   8   3  -3 11.9417 4.56527   3
  -7  -3   3 7.15963 3.28024   2
  -7  -3   3 5.65652 1.46375   5
  -7  -3   3 4.00593 1.33627   5
  -7  -3   3 7.01711 3.97410   6
  -7   3   3 6.46141 3.07230   2
  -7   3   3 5.10904 3.79303   1
  -7   3   3 3.64492 3.27695   6
   7   3  -3 11.9582 5.19923   3
  -6  -3   3 77.6537 7.53109   2
  -6  -3   3 80.6595 6.09928   4
  -6  -3   3 71.4251 5.98164   5
  -6  -3   3 71.0330 9.22652   6
  -6   3   3 81.3482 9.32642   1
   6   3  -3 67.7514 9.22815   3
  -6   3   3 67.6004 6.21434   4
  -6   3   3 76.8898 6.25499   5
  -6   3   3 76.8553 8.42758   6
  -5  -3   3 0.20808 1.53655   5
  -5  -3   3 1.23836 2.58806   2
  -5  -3   3 0.08688 3.21419   6
  -5  -3   3 -0.2634 1.42512   4
  -5  -3   3 1.35491 1.40256   7
  -5  -3   3 1.17718 1.18381   7
  -5   3   3 -1.6756 1.53722   5
  -5   3   3 1.37537 2.80658   1
  -5   3   3 1.92937 2.44126   6
   5   3  -3 4.67791 4.14213   3
  -5   3   3 2.20476 1.75878   4
  -5   3   3 1.28099 1.49061   7
  -4  -3   3 315.981 21.5605   5
  -4  -3   3 333.814 23.3663   6
  -4  -3   3 326.101 21.7084   7
  -4  -3   3 334.473 22.4664   2
  -4  -3   3 338.558 21.5011   7
   4  -3  -3 334.074 21.9955   7
  -4  -3   3 318.955 21.3493   4
  -4   3   3 284.449 21.5360   7
  -4   3   3 300.917 21.5364   4
  -4   3   3 291.869 22.1719   6
   4   3  -3 302.184 23.2417   3
  -4   3   3 311.893 21.7542   5
  -4   3   3 306.370 23.0233   1
  -3  -3   3 37.5526 4.11088   5
  -3  -3   3 36.0336 4.62682   2
  -3  -3   3 41.1942 4.42661   7
  -3  -3   3 33.6351 4.09485   4
  -3  -3   3 36.4256 4.67378   7
   3  -3  -3 42.6558 5.02520   7
   3  -3  -3 35.5719 3.54897   4
   3  -3  -3 41.0651 3.65859   4
  -3   3   3 34.6947 4.32639   6
  -3   3   3 33.5722 4.41520   5
  -3   3   3 34.8119 5.19064   1
  -3   3   3 37.9952 3.86950   2
  -3   3   3 33.1655 4.51211   7
  -3   3   3 37.9427 4.33127   4
   3   3  -3 41.3605 6.13197   3
  -2  -3   3 769.228 47.0912   4
   2  -3  -3 722.036 46.9424   4
   2  -3  -3 761.541 46.5525   2
   2  -3  -3 729.559 46.9122   4
  -2  -3   3 778.337 47.2243   5
  -2  -3   3 741.902 47.2132   2
  -2  -3   3 736.973 47.4659   7
  -2   3   3 669.563 46.9225   6
  -2   3   3 682.394 47.3435   7
  -2   3   3 683.492 47.1728   5
   2   3  -3 682.776 47.6471   3
  -2   3   3 661.828 46.9886   4
  -2   3   3 660.767 46.3666   2
  -2   3   3 685.703 47.5433   1
   1  -3  -3 172.192 13.2842   5
   1  -3  -3 169.491 12.2944   2
  -1  -3   3 163.452 12.9729   3
   1  -3  -3 185.370 13.1654   1
  -1  -3   3 177.718 12.9744   2
  -1  -3   3 194.349 13.2993   1
   1  -3  -3 184.871 13.1007   4
   1  -3  -3 189.391 12.6840   6
  -1  -3   3 182.663 13.2016   4
   1  -3  -3 171.240 13.8050   7
  -1  -3   3 175.217 13.4889   7
  -1  -3   3 186.482 13.2240   5
  -1   3   3 175.823 12.6378   6
   1   3  -3 177.185 14.0449   7
  -1   3   3 182.672 12.3917   2
  -1   3   3 177.435 13.0693   4
   1   3  -3 194.382 13.2131   5
   1   3  -3 186.061 13.2296   1
  -1   3   3 186.036 13.6145   7
  -1   3   3 176.953 13.0144   1
   1   3  -3 185.162 12.9474   2
   1   3  -3 172.443 13.0766   3
  -1   3   3 165.852 13.1677   5
   1   3  -3 188.378 13.1369   4
   0  -3   3 314.653 22.4798   2
   0  -3   3 318.515 22.2190   1
   0  -3  -3 344.613 22.3775   6
   0  -3   3 333.896 22.6426   4
   0  -3   3 335.841 22.7856   5
   0  -3  -3 327.420 22.2624   2
   0  -3  -3 323.480 23.0245   7
   0  -3  -3 329.764 22.9773   7
   0  -3  -3 327.169 22.7434   5
   0  -3   3 311.141 23.0226   7
   0  -3  -3 331.067 22.5393   4
   0  -3  -3 341.842 22.3211   1
   0   3   3 333.882 22.3059   2
   0   3  -3 321.531 22.6593   4
   0   3  -3 344.380 22.5372   2
   0   3  -3 316.362 22.6790   5
   0   3   3 326.011 22.6285   4
   0   3   3 345.737 22.8531   5
   0   3  -3 350.007 23.2019   7
   0   3  -3 333.680 22.3580   1
   0   3   3 319.312 22.9255   7
   0   3   3 330.120 22.4095   6
   0   3   3 337.157 22.3278   1
   0   3   3 327.196 22.1372   3
  -1  -3  -3 115.893 8.50561   1
  -1  -3  -3 98.9971 9.18219   7
   1  -3   3 101.668 8.37343   1
  -1  -3  -3 101.154 9.00777   7
   1  -3   3 97.9876 8.63929   4
  -1  -3  -3 101.225 8.87792   2
   1  -3   3 107.669 7.53352   3
   1  -3   3 107.781 9.37428   7
  -1  -3  -3 97.6458 8.67093   5
  -1  -3  -3 117.889 8.79986   4
   1  -3   3 108.472 8.92739   2
  -1   3  -3 113.400 9.19569   7
  -1   3  -3 127.846 8.48799   1
   1   3   3 122.061 9.02411   3
  -1   3  -3 120.159 8.99951   4
  -1   3  -3 112.239 8.89174   5
   1   3   3 128.328 8.58772   1
   1   3   3 110.894 8.45814   4
   1   3   3 108.741 9.06551   7
   1   3   3 124.529 8.92319   6
   2  -3   3 97.1666 7.30871   5
  -2  -3  -3 82.3393 6.87778   4
  -2  -3  -3 89.5052 7.39249   7
  -2  -3  -3 91.5909 7.54464   7
   2  -3   3 87.2084 6.78430   4
  -2  -3  -3 86.6122 8.09752   2
   2  -3   3 92.8494 7.76866   7
  -2  -3  -3 87.7871 7.24985   5
   2  -3   3 95.9641 7.03151   4
   2  -3   3 88.2512 6.73579   3
  -2   3  -3 92.4506 7.24859   4
  -2   3  -3 89.5915 7.40257   5
   2   3   3 83.4969 7.92737   3
   2   3   3 78.4883 7.10642   5
   2   3   3 83.1057 7.35089   7
  -2   3  -3 86.8070 6.51322   3
  -2   3  -3 83.1070 7.17345   1
  -2   3  -3 90.0428 7.62889   7
  -2   3  -3 85.9236 6.22093   6
  -3  -3  -3 12.4574 2.50437   5
   3  -3   3 14.5140 3.04423   7
  -3  -3  -3 8.69023 3.76938   2
   3  -3   3 12.4234 3.05400   3
  -3  -3  -3 11.5218 2.75530   7
   3  -3   3 11.3640 2.45713   5
  -3  -3  -3 13.7020 2.78677   7
  -3   3  -3 11.5627 2.44892   4
  -3   3  -3 12.2550 2.61796   5
  -3   3  -3 11.3546 2.97820   3
  -3   3  -3 12.1091 2.47076   6
   3   3   3 24.2876 4.87300   3
  -3   3  -3 13.9355 3.02745   1
  -3   3  -3 14.8701 2.91658   7
   3   3   3 15.5646 2.80636   7
  -4  -3  -3 114.130 8.85447   5
   4  -3   3 104.541 9.59052   3
  -4  -3  -3 106.629 8.49917   7
  -4  -3  -3 122.756 10.9382   2
  -4  -3  -3 116.914 8.64685   7
   4   3   3 118.330 10.8117   3
  -4   3  -3 125.623 9.09094   5
  -4   3  -3 122.954 9.33248   6
  -4   3  -3 114.989 8.83283   7
  -4   3  -3 128.073 9.14320   4
  -4   3  -3 126.435 10.0554   1
  -5  -3  -3 14.8155 2.40846   5
  -5  -3  -3 15.7628 2.34375   5
   5  -3   3 14.0214 2.81276   7
   5  -3   3 15.2921 3.95103   3
  -5  -3  -3 14.7035 4.47049   2
  -5   3  -3 22.7634 3.88536   6
  -5   3  -3 20.9454 2.57932   4
  -5   3  -3 15.1469 3.55364   1
   5   3   3 16.4306 2.36322   7
   5   3   3 16.4952 4.71328   3
  -6  -3  -3 83.7687 9.68209   2
  -6  -3  -3 79.6072 6.05735   5
   6  -3   3 86.2997 8.46387   3
  -6  -3  -3 85.3591 6.18046   5
   6   3   3 62.4591 9.19775   3
  -6   3  -3 77.0217 8.87435   1
  -6   3  -3 83.3895 7.89028   6
  -7  -3  -3 14.2794 4.54319   1
  -7  -3  -3 14.7649 4.36442   6
  -7  -3  -3 13.5341 4.72171   2
   7  -3   3 6.27341 3.61398   3
   7   3   3 20.9658 5.54136   3
  -7   3  -3 7.66760 3.29419   6
  -7   3  -3 16.8880 4.31722   1
   8  -3   3 -1.5832 3.11183   3
  -8  -3  -3 3.63093 3.66346   1
  -8  -3  -3 0.81593 3.49816   2
  -8  -3  -3 0.96849 3.14515   6
  -8   3  -3 3.95726 3.09052   1
   8   3   3 9.45353 4.54694   3
  -9  -3  -3 2.07832 3.61688   6
  -9  -3  -3 -4.7971 2.09528   1
  -9  -3  -3 -1.5154 2.91255   2
   9   3   3 -0.3918 3.87698   3
  -9   3  -3 -0.1020 3.11208   2
  -9   3  -3 0.95155 3.24876   1
  -9  -4   3 -1.4874 3.00444   2
  -9  -4   3 3.22563 4.15843   6
  -9  -4   3 -3.4881 3.26528   1
   9   4  -3 1.62211 4.28664   3
  -9   4   3 4.64576 3.72259   1
  -8  -4   3 3.82606 3.93471   6
  -8  -4   3 3.33800 1.22759   5
  -8  -4   3 2.74796 3.28222   2
  -8  -4   3 3.34556 1.20037   5
  -8   4   3 7.21074 3.61804   6
   8   4  -3 2.83421 3.97629   3
  -8   4   3 7.17699 3.97748   1
  -7  -4   3 5.42970 3.51389   2
  -7  -4   3 2.59933 1.61881   5
  -7  -4   3 -1.8031 3.39052   6
  -7  -4   3 2.26489 1.52012   5
  -7   4   3 6.97736 3.67755   1
   7   4  -3 -0.0718 3.87196   3
  -7   4   3 2.51285 2.84657   6
  -6  -4   3 88.1762 6.99247   4
  -6  -4   3 82.6963 9.96914   6
  -6  -4   3 94.2962 9.41178   2
  -6  -4   3 88.4675 6.17709   7
  -6  -4   3 81.0923 6.17095   7
  -6  -4   3 72.9008 6.69953   5
  -6   4   3 82.7850 7.82261   6
  -6   4   3 82.6763 7.15653   4
  -6   4   3 91.2484 9.87949   1
   6   4  -3 84.9193 10.0567   3
  -5  -4   3 27.2433 4.80235   2
  -5  -4   3 23.3033 3.37032   7
  -5  -4   3 25.6290 3.44683   4
  -5  -4   3 20.1556 3.12643   7
  -5  -4   3 21.7714 3.28113   5
   5  -4  -3 20.5373 3.80492   7
  -5  -4   3 37.5365 6.30432   6
  -5   4   3 25.6928 3.73719   5
  -5   4   3 29.5773 3.83302   4
   5   4  -3 20.0739 5.20563   3
  -5   4   3 34.7328 5.78922   1
  -5   4   3 27.3335 4.19605   6
  -5   4   3 22.7712 3.49865   7
  -4  -4   3 60.2280 5.14068   5
  -4  -4   3 55.6826 5.05213   7
  -4  -4   3 63.6886 5.26622   4
  -4  -4   3 61.5108 5.46253   7
  -4  -4   3 60.0146 6.65641   2
   4  -4  -3 59.6535 6.12726   7
  -4   4   3 40.6387 6.28769   1
  -4   4   3 30.7490 4.85152   5
  -4   4   3 32.5123 4.92171   7
   4   4  -3 30.2441 6.16989   3
  -4   4   3 42.7962 5.10448   4
  -4   4   3 39.2412 5.17028   6
   3  -4  -3 61.0470 5.66710   4
   3  -4  -3 50.3778 6.43630   7
  -3  -4   3 72.6539 6.30563   5
  -3  -4   3 60.6805 6.01798   7
  -3  -4   3 65.2644 5.98051   4
  -3  -4   3 57.1530 6.57310   2
   3  -4  -3 58.3814 5.73947   4
  -3  -4   3 60.5067 6.68028   7
  -3   4   3 64.9738 6.22793   4
   3   4  -3 75.2296 8.06113   3
  -3   4   3 74.0438 7.71954   1
  -3   4   3 63.7574 5.40558   2
  -3   4   3 53.1003 6.27738   7
  -3   4   3 69.2565 5.86477   6
  -3   4   3 69.3631 6.56605   5
  -2  -4   3 70.7181 7.05810   7
  -2  -4   3 75.6385 6.37434   7
  -2  -4   3 62.3301 5.84205   5
   2  -4  -3 73.9496 6.00112   4
   2  -4  -3 67.0695 5.22433   2
   2  -4  -3 70.6401 7.27959   7
  -2  -4   3 74.0929 6.80037   2
  -2  -4   3 67.7439 5.92798   4
  -2   4   3 45.4287 6.13800   7
   2   4  -3 56.2443 6.61073   3
  -2   4   3 51.6832 5.10429   6
  -2   4   3 46.0055 6.09920   1
  -2   4   3 41.6483 5.60773   4
  -2   4   3 43.8198 6.06100   5
  -2   4   3 44.4401 4.79925   2
  -1  -4   3 42.2642 5.23497   4
  -1  -4   3 43.4637 5.16309   2
  -1  -4   3 35.5287 5.30378   7
   1  -4  -3 47.4816 4.33471   2
   1  -4  -3 41.8575 5.97958   7
  -1  -4   3 32.7212 5.00759   5
   1  -4  -3 40.7161 5.27974   5
  -1  -4   3 44.6109 5.38438   7
  -1  -4   3 40.6135 5.07476   3
   1   4  -3 38.5159 5.07922   1
   1   4  -3 42.3969 4.83964   3
   1   4  -3 37.6337 5.42342   5
  -1   4   3 48.3950 4.51984   6
  -1   4   3 48.3467 5.54233   4
  -1   4   3 42.4402 4.35283   2
  -1   4   3 51.0548 5.66912   5
  -1   4   3 48.8107 5.20156   1
  -1   4   3 39.2705 5.47360   7
   0  -4   3 4161.76 265.729   4
   0  -4   3 4047.77 265.380   2
   0  -4  -3 4071.18 265.241   2
   0  -4   3 3987.57 265.725   5
   0  -4   3 4317.39 264.797   3
   0  -4  -3 4260.29 266.119   7
   0  -4  -3 4229.57 265.770   5
   0  -4   3 3970.10 266.096   7
   0  -4  -3 4030.53 266.103   7
   0   4   3 4067.50 265.007   3
   0   4   3 4141.54 265.581   4
   0   4   3 4244.26 265.318   2
   0   4   3 3950.50 265.854   7
   0   4   3 4178.72 265.298   6
   0   4   3 4160.19 265.788   5
   0   4  -3 4249.27 265.762   5
   0   4  -3 3818.47 265.269   1
   0   4   3 4093.39 265.322   1
   1  -4   3 39.3530 5.06910   5
  -1  -4  -3 51.0881 6.15342   7
  -1  -4  -3 36.8858 5.01789   5
   1  -4   3 43.9760 3.38930   6
   1  -4   3 44.2020 5.11196   4
   1  -4   3 34.2167 5.32603   7
  -1  -4  -3 50.9073 5.61166   2
  -1  -4  -3 51.0576 5.81681   7
   1  -4   3 56.9630 5.62033   2
  -1   4  -3 37.8328 5.51291   7
   1   4   3 34.3995 5.17226   7
   1   4   3 44.3788 5.07616   6
   1   4   3 44.0836 5.48028   3
   1   4   3 43.9590 4.99317   1
  -1   4  -3 44.4008 4.80370   1
  -1   4  -3 40.6471 5.25596   5
   2  -4   3 22.1571 2.06935   6
   2  -4   3 23.7849 3.91019   2
   2  -4   3 22.5232 2.42270   3
   2  -4   3 23.5020 3.48961   5
  -2  -4  -3 24.5179 4.01377   7
  -2  -4  -3 26.9936 3.90498   5
   2  -4   3 24.1561 3.44229   4
  -2  -4  -3 27.6321 4.22426   7
  -2  -4  -3 20.3961 4.29403   2
   2  -4   3 15.6197 3.83898   7
   2  -4   3 24.4098 3.25142   4
   2   4   3 8.37122 3.62798   3
   2   4   3 8.91104 2.72380   5
  -2   4  -3 7.29461 3.20611   7
  -2   4  -3 7.97321 2.79049   1
   2   4   3 10.6966 3.05942   1
  -2   4  -3 6.83808 2.81705   5
   2   4   3 8.91613 3.00226   7
  -3  -4  -3 29.1183 3.88441   5
   3  -4   3 27.6068 3.62134   5
   3  -4   3 26.3467 4.13619   7
  -3  -4  -3 21.5613 3.58407   7
   3  -4   3 24.9336 2.90746   4
  -3  -4  -3 24.0073 3.87237   7
   3  -4   3 25.9018 3.62084   3
   3  -4   3 28.1186 3.01879   4
  -3  -4  -3 18.9572 4.56499   2
  -3   4  -3 23.4278 2.83450   6
  -3   4  -3 23.4731 3.98578   1
  -3   4  -3 31.5778 4.31334   7
  -3   4  -3 21.9996 3.53982   5
  -3   4  -3 24.9576 3.17243   3
   3   4   3 29.5974 5.69687   3
   3   4   3 22.2880 3.75745   7
  -4  -4  -3 439.240 28.7842   7
   4  -4   3 449.079 29.1761   3
  -4  -4  -3 406.141 30.0875   2
  -4  -4  -3 419.105 28.7294   7
   4  -4   3 414.535 29.1759   7
  -4  -4  -3 411.097 28.6715   5
  -4   4  -3 428.921 28.5060   6
   4   4   3 423.084 30.4900   3
  -4   4  -3 432.360 29.0205   7
   4   4   3 433.637 30.7768   7
  -4   4  -3 416.679 28.8390   5
  -4   4  -3 426.709 29.4668   1
  -5  -4  -3 23.6547 3.22632   5
  -5  -4  -3 25.1894 2.94986   7
  -5  -4  -3 27.9595 3.05440   7
  -5  -4  -3 26.8268 5.39089   2
  -5  -4  -3 24.2712 3.39678   5
   5  -4   3 27.8128 4.74448   3
  -5   4  -3 23.4890 3.73346   6
   5   4   3 35.3014 6.31910   3
   5   4   3 30.2447 3.86270   7
  -5   4  -3 26.3837 4.69012   1
  -6  -4  -3 106.232 7.03593   5
  -6  -4  -3 90.0174 6.89049   5
   6  -4   3 87.7861 8.37160   3
  -6  -4  -3 88.9134 9.94232   2
   6   4   3 91.6312 10.8856   3
  -6   4  -3 75.4709 8.91406   1
  -6   4  -3 70.8955 7.51489   6
  -7  -4  -3 41.9478 6.70956   2
  -7  -4  -3 34.4155 3.18413   5
   7  -4   3 40.9640 6.06867   3
  -7  -4  -3 41.6266 3.41061   5
   7   4   3 36.1552 7.17995   3
  -7   4  -3 58.5930 7.02296   1
  -7   4  -3 38.7003 5.28022   6
  -8  -4  -3 10.7804 3.65997   1
  -8  -4  -3 5.31349 4.27580   6
  -8  -4  -3 8.35169 3.99207   2
  -8   4  -3 1.24357 3.03358   1
   8   4   3 -4.1312 3.54578   3
  -9  -4  -3 8.43819 3.82822   2
  -9  -4  -3 5.77484 3.93718   6
  -9  -4  -3 3.69269 3.31388   1
   9   4   3 1.76471 4.17736   3
  -9   4  -3 -2.7440 3.00237   1
  -9   4  -3 2.08075 3.15908   2
  -9  -5   3 1.04174 3.48811   1
  -9  -5   3 0.49524 2.67991   2
  -9  -5   3 0.91829 3.95428   6
  -9   5   3 0.55280 3.30713   1
   9   5  -3 -0.5944 4.15172   3
  -8  -5   3 3.05788 1.53902   5
  -8  -5   3 3.45425 3.47367   2
  -8  -5   3 0.70187 3.83335   6
  -8  -5   3 4.23597 1.67051   5
  -8   5   3 7.70225 4.22036   1
   8   5  -3 4.48142 4.21764   3
  -8   5   3 7.81870 3.31853   6
  -7  -5   3 14.6144 2.66053   5
  -7  -5   3 16.0346 5.18700   6
  -7  -5   3 16.7620 2.86746   5
  -7  -5   3 14.8221 4.16202   2
  -7   5   3 15.6907 4.54578   1
   7   5  -3 15.7429 5.43349   3
  -7   5   3 14.7659 3.88718   6
  -6  -5   3 8.58080 2.56060   5
  -6  -5   3 17.9309 5.07753   6
  -6  -5   3 16.3826 2.71955   7
  -6  -5   3 13.0571 3.87668   2
  -6  -5   3 14.4296 2.92096   4
   6   5  -3 18.3665 5.52999   3
  -6   5   3 14.0861 3.33943   6
  -6   5   3 12.8161 4.63223   1
  -6   5   3 14.9113 3.22014   4
   5  -5  -3 22.0593 4.02736   7
  -5  -5   3 23.2347 3.59644   7
  -5  -5   3 26.4520 3.94638   7
  -5  -5   3 24.1318 3.59009   5
  -5  -5   3 23.2937 3.53353   4
  -5  -5   3 19.8271 4.13307   2
   5   5  -3 20.8022 5.25755   3
  -5   5   3 14.8601 3.47003   5
  -5   5   3 24.9326 5.21129   1
  -5   5   3 25.3983 3.91793   7
  -5   5   3 23.8319 4.07437   6
  -5   5   3 23.3016 3.80069   4
   4  -5  -3 323.347 21.7845   4
  -4  -5   3 316.299 23.1873   2
  -4  -5   3 314.684 22.6759   5
  -4  -5   3 309.060 22.9066   7
  -4  -5   3 315.675 22.4919   4
   4  -5  -3 311.155 22.4697   5
   4  -5  -3 303.284 22.9730   7
  -4  -5   3 323.748 22.5844   7
   4  -5  -3 317.940 21.7655   4
  -4   5   3 322.636 23.5540   1
  -4   5   3 358.520 23.0554   5
  -4   5   3 341.600 22.5336   6
  -4   5   3 332.838 22.6508   4
   4   5  -3 345.330 24.1888   3
  -4   5   3 316.317 22.8501   7
  -3  -5   3 34.8812 4.88149   7
   3  -5  -3 31.9603 4.15127   2
  -3  -5   3 30.4511 4.93827   7
   3  -5  -3 31.5571 4.60772   5
  -3  -5   3 33.9563 4.65894   5
   3  -5  -3 34.5984 5.47303   7
   3  -5  -3 31.4092 4.32978   4
  -3  -5   3 31.0049 4.93075   2
  -3  -5   3 34.0540 4.56654   4
  -3   5   3 42.0602 5.10237   4
   3   5  -3 38.3901 6.03260   3
  -3   5   3 40.9755 4.37357   6
  -3   5   3 42.3530 5.27594   5
  -3   5   3 40.5070 5.58007   1
  -3   5   3 36.6530 5.41522   7
  -2  -5   3 71.4872 6.60074   2
  -2  -5   3 65.5819 7.20004   7
   2  -5  -3 69.5048 7.50316   7
  -2  -5   3 76.5914 6.79333   7
  -2  -5   3 69.8264 6.43688   4
   2  -5  -3 66.7135 5.64010   2
  -2  -5   3 73.0344 6.74133   5
   2  -5  -3 72.4937 6.39415   4
  -2   5   3 52.4552 6.63519   5
  -2   5   3 51.4168 6.44865   4
  -2   5   3 50.4847 6.65082   1
  -2   5   3 48.3671 5.31303   6
   2   5  -3 54.2919 6.96621   3
  -2   5   3 57.6996 7.02493   7
  -2   5   3 59.3177 6.21762   2
   1  -5  -3 135.298 11.8071   7
   1  -5  -3 144.441 10.4365   2
  -1  -5   3 157.069 11.9795   7
  -1  -5   3 153.937 11.1533   2
  -1  -5   3 135.388 11.3054   4
  -1  -5   3 137.888 11.2036   5
  -1   5   3 143.054 11.2165   4
   1   5  -3 138.337 10.8615   3
  -1   5   3 143.676 11.4454   5
  -1   5   3 131.034 10.3373   6
  -1   5   3 146.514 11.0036   1
   1   5  -3 123.190 10.9687   1
  -1   5   3 132.040 11.4727   7
   0  -5  -3 632.561 43.1427   5
   0  -5   3 645.506 43.1887   5
   0  -5  -3 650.311 43.7167   7
   0  -5  -3 619.243 42.5921   2
   0  -5   3 676.155 42.0396   3
   0  -5   3 615.203 42.8131   2
   0  -5   3 625.355 43.0124   4
   0  -5   3 676.172 43.7902   7
   0   5   3 655.673 42.3839   3
   0   5  -3 584.742 42.6236   1
   0   5  -3 672.113 43.3188   5
   0   5   3 620.592 42.9491   4
   0   5   3 618.771 42.6885   1
   0   5   3 644.250 43.5624   7
   0   5   3 631.722 42.6881   6
   0   5   3 686.878 43.4610   5
   1  -5   3 39.6946 5.13306   2
   1  -5   3 32.5989 4.95539   5
   1  -5   3 30.9927 4.70959   4
  -1  -5  -3 26.2838 5.31533   7
  -1  -5  -3 31.3004 4.82439   2
   1  -5   3 37.1340 3.39786   6
  -1  -5  -3 31.5370 4.95527   5
  -1  -5  -3 34.7733 5.60645   7
   1  -5   3 46.9705 6.14266   7
   1   5   3 42.1758 5.06129   3
  -1   5  -3 41.6535 5.48276   5
   1   5   3 39.3459 5.25842   5
   1   5   3 44.2887 4.90288   1
   1   5   3 35.7032 5.37208   7
  -1   5  -3 41.2526 4.75947   1
  -2  -5  -3 531.463 35.1929   7
  -2  -5  -3 512.664 34.9606   5
   2  -5   3 525.135 33.4821   6
   2  -5   3 509.199 35.3675   7
  -2  -5  -3 511.990 35.3074   7
  -2  -5  -3 544.008 35.4003   2
   2  -5   3 511.803 34.9549   2
   2  -5   3 524.226 34.7052   4
  -2   5  -3 492.505 33.3649   6
   2   5   3 510.835 34.9711   1
  -2   5  -3 512.281 34.9821   5
  -2   5  -3 512.023 35.3464   7
   2   5   3 505.699 35.3736   3
  -2   5  -3 501.703 34.5101   1
   2   5   3 492.459 35.0328   7
  -3  -5  -3 34.2006 5.33009   2
  -3  -5  -3 25.5447 3.97858   5
  -3  -5  -3 26.4464 4.52575   7
  -3  -5  -3 19.0071 3.99626   7
   3  -5   3 31.3029 3.26332   6
   3  -5   3 23.3054 3.45126   4
   3  -5   3 28.0881 3.65608   4
   3  -5   3 27.5332 3.45583   3
   3  -5   3 26.7733 4.11908   5
   3  -5   3 35.4851 5.07102   7
  -3   5  -3 31.5222 2.87429   6
  -3   5  -3 47.4389 5.21923   1
  -3   5  -3 33.1625 4.61054   5
  -3   5  -3 30.2207 3.16940   3
  -3   5  -3 23.4085 4.46158   7
   3   5   3 31.2962 4.64695   7
   3   5   3 33.4995 5.56026   3
   4  -5   3 156.572 11.7366   7
  -4  -5  -3 148.722 12.4615   2
   4  -5   3 146.410 10.9674   3
  -4  -5  -3 151.043 11.0996   5
  -4  -5  -3 146.397 11.1484   5
  -4  -5  -3 155.342 11.2222   7
  -4  -5  -3 149.019 11.1535   7
  -4   5  -3 142.245 11.3893   7
   4   5   3 144.386 11.2319   7
  -4   5  -3 132.362 10.1875   6
  -4   5  -3 143.898 11.1976   5
  -4   5  -3 133.007 11.5033   1
   4   5   3 104.407 11.9762   3
  -5  -5  -3 24.1527 3.53079   5
   5  -5   3 26.3976 4.33851   3
  -5  -5  -3 23.1108 3.48503   7
   5  -5   3 26.5772 4.26158   7
  -5  -5  -3 25.6009 3.51114   7
  -5  -5  -3 19.6832 3.36171   5
  -5  -5  -3 35.2481 5.92106   2
  -5   5  -3 26.5619 3.65663   6
  -5   5  -3 24.4266 4.30605   1
   5   5   3 26.7215 5.54858   3
  -6  -5  -3 71.4388 9.04033   2
  -6  -5  -3 69.6810 5.02131   7
  -6  -5  -3 74.0228 6.11418   5
   6  -5   3 74.5701 7.04328   3
  -6  -5  -3 64.4852 5.85352   5
  -6   5  -3 47.8323 6.91491   1
  -6   5  -3 69.3792 6.33283   6
   6   5   3 56.7090 8.74254   3
  -7  -5  -3 5.77449 4.16939   2
  -7  -5  -3 7.71221 1.95901   5
  -7  -5  -3 9.15021 2.07332   5
   7   5   3 10.4020 4.76060   3
  -7   5  -3 8.40293 3.47577   1
  -8  -5  -3 32.1131 6.08538   2
  -8  -5  -3 33.1263 6.47038   6
  -8  -5  -3 25.3373 2.27191   5
  -8  -5  -3 27.1464 2.21200   5
  -8   5  -3 18.6444 4.49341   1
   8   5   3 18.4780 6.11355   3
  -9  -5  -3 5.13200 3.75813   1
  -9  -5  -3 4.24893 3.64977   2
  -9  -5  -3 4.89493 3.81581   6
  -9   5  -3 4.25016 3.39424   1
   9   5   3 6.58691 4.79928   3
  -9  -6   3 1.25776 1.21097   5
  -9  -6   3 2.70578 3.32567   2
  -9  -6   3 5.47067 4.36391   6
  -9   6   3 6.86430 3.92110   1
   9   6  -3 -1.4450 3.52804   3
  -8  -6   3 3.50974 3.42525   2
  -8  -6   3 -0.2908 1.66029   5
  -8  -6   3 4.38595 4.41813   6
  -8   6   3 6.29926 3.86004   1
   8   6  -3 3.50765 4.63609   3
  -7  -6   3 5.10695 2.34543   5
  -7  -6   3 9.72378 4.62983   6
  -7  -6   3 6.04890 3.74236   2
  -7  -6   3 4.77113 2.10104   5
  -7   6   3 7.36593 3.80889   1
  -7   6   3 7.23131 3.14797   6
   7   6  -3 4.98784 4.26204   3
  -6  -6   3 253.772 18.5202   4
  -6  -6   3 265.993 18.6324   5
  -6  -6   3 279.021 19.8689   2
  -6  -6   3 259.684 18.3775   7
  -6  -6   3 239.156 20.3382   6
  -6   6   3 241.314 18.6708   4
  -6   6   3 276.848 18.9382   6
  -6   6   3 266.081 20.0463   1
   6   6  -3 242.859 20.6218   3
  -5  -6   3 29.4533 4.59899   7
  -5  -6   3 24.7571 3.97773   5
  -5  -6   3 20.6035 3.88069   4
  -5  -6   3 25.3862 4.62485   7
  -5  -6   3 34.4597 5.40088   2
   5  -6  -3 30.1684 4.76608   7
  -5   6   3 19.4271 5.01234   1
   5   6  -3 18.3468 5.17429   3
  -5   6   3 22.6418 3.99189   6
  -5   6   3 22.4077 4.15958   5
  -5   6   3 23.0404 4.17045   4
  -5   6   3 24.8617 4.16275   7
  -4  -6   3 109.728 9.71053   5
  -4  -6   3 104.300 9.93681   7
  -4  -6   3 108.932 9.53125   4
  -4  -6   3 113.896 9.82882   7
  -4  -6   3 108.056 10.0573   2
   4  -6  -3 121.876 9.12344   4
   4  -6  -3 111.998 10.2760   7
   4  -6  -3 122.394 9.67464   5
  -4   6   3 124.289 9.36263   6
  -4   6   3 129.172 10.0424   4
  -4   6   3 122.317 10.2176   7
   4   6  -3 104.301 10.7218   3
  -4   6   3 114.558 9.90700   5
  -4   6   3 118.772 10.5235   1
  -3  -6   3 27.2535 4.85563   2
  -3  -6   3 21.5454 4.59324   7
  -3  -6   3 19.7646 4.33386   7
   3  -6  -3 29.6537 4.24310   4
  -3  -6   3 29.5516 4.59742   5
   3  -6  -3 19.6106 4.51219   7
   3  -6  -3 26.0504 3.75984   2
   3  -6  -3 28.2367 4.36881   5
  -3  -6   3 24.7403 4.48186   4
   3   6  -3 24.9363 5.42590   3
  -3   6   3 32.5779 3.85815   6
  -3   6   3 30.3401 4.50904   4
  -3   6   3 18.0612 4.31114   5
  -3   6   3 26.2406 4.54023   7
  -3   6   3 25.9473 4.63640   1
   2  -6  -3 124.469 9.71274   5
   2  -6  -3 124.568 9.49486   4
   2  -6  -3 128.549 8.72878   2
  -2  -6   3 109.090 9.39516   2
  -2  -6   3 130.527 9.84988   5
  -2  -6   3 111.283 10.0064   7
  -2  -6   3 131.836 9.70410   4
   2  -6  -3 114.824 10.1981   7
  -2   6   3 95.2038 8.43826   6
  -2   6   3 90.5020 9.18567   4
  -2   6   3 107.763 9.46050   1
   2   6  -3 80.5330 9.31038   3
  -2   6   3 98.7189 9.77159   7
   2   6  -3 94.1907 9.45861   1
  -2   6   3 93.3952 9.50917   5
  -1  -6   3 23.8819 4.52266   2
  -1  -6   3 25.5680 4.88165   4
  -1  -6   3 27.2017 4.76031   5
   1  -6  -3 32.1064 5.01648   4
  -1  -6   3 32.2457 5.36156   7
   1  -6  -3 29.2402 5.55016   7
   1  -6  -3 27.8871 4.10261   2
   1   6  -3 33.1505 4.96852   1
  -1   6   3 28.9370 4.73764   4
  -1   6   3 27.6366 4.81211   5
   1   6  -3 26.2672 4.28215   3
  -1   6   3 30.8455 4.53281   1
  -1   6   3 34.8905 5.42806   7
  -1   6   3 33.7693 4.42789   6
   0  -6  -3 1422.73 94.2443   5
   0  -6   3 1447.51 94.1931   5
   0  -6   3 1358.27 92.6975   3
   0  -6   3 1355.84 93.9769   4
   0  -6   3 1433.27 93.7439   2
   0  -6  -3 1459.52 94.8182   7
   0  -6  -3 1497.42 93.6312   2
   0  -6   3 1444.75 94.7093   7
   0   6   3 1405.05 93.8136   4
   0   6   3 1421.90 94.1564   5
   0   6  -3 1405.93 92.7454   3
   0   6   3 1439.50 93.5876   6
   0   6   3 1427.69 93.1602   3
   0   6  -3 1475.16 94.1728   5
   0   6  -3 1467.70 93.7657   1
   0   6   3 1427.82 94.4781   7
   0   6   3 1423.27 93.6978   1
   1  -6   3 82.0749 7.76462   5
   1  -6   3 91.0633 9.27027   7
   1  -6   3 86.8879 7.53316   2
  -1  -6  -3 85.7312 7.87308   5
   1  -6   3 74.3069 5.99458   6
  -1  -6  -3 65.5283 7.57544   2
   1  -6   3 88.0467 8.67213   4
  -1  -6  -3 80.8080 8.93902   7
  -1   6  -3 67.7195 7.91432   5
   1   6   3 71.3655 7.77952   3
   1   6   3 72.9696 8.03343   5
   1   6   3 68.1409 7.98069   7
   1   6   3 92.4986 7.55002   1
  -1   6  -3 78.8455 7.25220   1
   2  -6   3 109.693 9.55835   7
   2  -6   3 108.507 8.80897   2
  -2  -6  -3 94.1445 8.61807   5
  -2  -6  -3 103.250 9.23182   7
   2  -6   3 95.4090 8.48435   4
  -2  -6  -3 93.3988 8.95490   2
   2  -6   3 105.231 7.01073   6
  -2  -6  -3 113.344 10.2998   7
   2   6   3 91.7349 9.14190   7
   2   6   3 92.5435 9.79022   3
  -2   6  -3 86.9417 8.57097   5
  -2   6  -3 89.6006 6.92436   6
   2   6   3 89.9335 8.88938   1
  -2   6  -3 85.0377 8.17626   1
  -3  -6  -3 16.1794 3.96870   7
  -3  -6  -3 18.0467 4.42913   2
   3  -6   3 14.5592 3.40497   5
   3  -6   3 19.7124 2.50581   6
  -3  -6  -3 17.3246 3.92075   7
  -3  -6  -3 9.43306 3.19513   5
   3  -6   3 22.9491 4.39284   7
   3  -6   3 16.0203 3.90187   2
   3  -6   3 11.8374 2.95663   4
   3   6   3 17.5794 4.59159   3
  -3   6  -3 26.0825 4.05003   1
  -3   6  -3 19.4134 4.01879   7
  -3   6  -3 19.4840 2.21671   6
  -3   6  -3 16.7397 2.07372   3
  -3   6  -3 19.9082 3.80461   5
   3   6   3 14.1129 3.77523   7
  -4  -6  -3 236.725 16.8662   5
   4  -6   3 223.869 15.8271   4
   4  -6   3 237.284 15.9507   4
  -4  -6  -3 228.308 17.2191   7
   4  -6   3 238.621 17.6197   7
  -4  -6  -3 225.163 17.8513   2
  -4  -6  -3 225.830 17.0116   7
  -4  -6  -3 240.657 16.9241   5
  -4   6  -3 236.413 17.3308   7
  -4   6  -3 243.990 17.2168   5
  -4   6  -3 235.667 16.0104   3
   4   6   3 235.265 17.0742   7
   4   6   3 218.399 18.1527   3
  -4   6  -3 230.051 15.6943   6
  -4   6  -3 206.638 16.8381   1
  -5  -6  -3 8.23677 2.83511   7
  -5  -6  -3 10.4166 4.34050   2
   5  -6   3 7.72998 3.57956   7
  -5  -6  -3 7.90127 2.61580   5
  -5  -6  -3 7.96613 2.57301   5
   5   6   3 11.0257 4.53626   3
  -5   6  -3 9.21108 2.21439   6
  -5   6  -3 10.3481 3.56907   1
  -6  -6  -3 57.6783 5.77817   5
  -6  -6  -3 67.6085 5.56949   7
  -6  -6  -3 59.1843 5.81312   5
  -6  -6  -3 72.6611 8.57909   2
  -6   6  -3 51.0528 6.74366   1
   6   6   3 53.7224 8.50229   3
  -6   6  -3 51.9477 7.49165   6
  -7  -6  -3 7.31322 2.16367   5
  -7  -6  -3 6.69183 3.90637   2
  -7  -6  -3 3.76458 2.00438   5
   7   6   3 6.10784 4.75229   3
  -7   6  -3 9.98672 3.52184   1
  -8  -6  -3 11.1268 1.99609   5
  -8  -6  -3 6.93811 1.82107   5
  -8  -6  -3 12.4881 4.55092   2
   8   6   3 13.5419 5.19719   3
  -8   6  -3 5.70729 3.73224   1
  -9  -6  -3 10.5490 4.68142   6
  -9  -6  -3 8.85232 4.21535   2
   9   6   3 6.51732 4.53955   3
  -9   6  -3 4.43195 3.88373   1
  -9  -7   3 1.84574 4.05944   6
  -9  -7   3 -0.7161 1.42300   5
  -9  -7   3 5.01116 3.37424   2
  -9   7   3 -0.9098 3.08124   1
   9   7  -3 3.07472 4.31774   3
  -8  -7   3 31.3136 3.73881   5
  -8  -7   3 19.9087 5.74716   6
  -8  -7   3 26.4513 5.49974   2
  -8   7   3 22.9757 5.57953   1
   8   7  -3 15.6741 5.42456   3
  -7  -7   3 21.8285 3.17343   7
  -7  -7   3 15.7041 5.38616   6
  -7  -7   3 16.6619 4.82167   2
  -7  -7   3 15.0999 3.15866   5
  -7   7   3 14.8500 3.63578   6
   7   7  -3 12.5024 4.88603   3
  -7   7   3 14.0440 4.54715   1
  -6  -7   3 45.7970 6.59768   2
  -6  -7   3 39.6357 5.41220   5
  -6  -7   3 45.5133 5.39516   5
  -6  -7   3 63.2735 6.38004   7
  -6  -7   3 44.9670 5.67351   4
  -6   7   3 49.8695 5.90938   4
   6   7  -3 47.2384 7.72704   3
  -6   7   3 47.9186 5.56161   6
  -6   7   3 36.5605 6.32058   1
   5  -7  -3 10.7686 2.09719   4
  -5  -7   3 11.2696 3.71312   2
  -5  -7   3 8.59307 3.25753   7
   5  -7  -3 8.16598 3.39004   7
  -5  -7   3 5.90214 2.75652   4
  -5  -7   3 13.2890 3.42437   5
  -5   7   3 14.3366 3.53155   4
  -5   7   3 7.84089 2.74615   6
   5   7  -3 10.7939 4.89141   3
  -5   7   3 16.2349 3.83430   7
  -5   7   3 11.8066 3.95124   1
   4  -7  -3 319.236 22.3467   4
  -4  -7   3 322.427 23.2786   7
  -4  -7   3 315.110 22.9076   5
  -4  -7   3 325.012 23.3684   2
  -4  -7   3 308.636 22.8263   4
   4  -7  -3 319.119 23.7292   7
   4  -7  -3 325.569 22.9781   5
  -4  -7   3 334.817 23.1868   7
   4  -7  -3 331.682 22.5607   2
  -4   7   3 325.507 22.2304   6
  -4   7   3 309.628 23.2014   5
   4   7  -3 321.347 23.9273   3
  -4   7   3 318.595 23.4006   1
  -4   7   3 304.720 23.2590   7
  -4   7   3 321.558 23.1086   4
   3  -7  -3 4.83464 2.43799   2
  -3  -7   3 5.89325 3.45054   7
   3  -7  -3 4.74387 3.21732   7
  -3  -7   3 1.36730 2.85453   2
  -3  -7   3 6.74248 3.18576   4
   3  -7  -3 2.45211 2.44864   4
  -3  -7   3 2.25030 2.80346   5
  -3   7   3 2.26924 2.20387   6
   3   7  -3 4.48856 3.50642   3
  -3   7   3 2.98313 3.02728   5
  -3   7   3 -1.0020 2.99719   7
  -3   7   3 3.03114 3.32428   1
  -3   7   3 3.55660 2.81159   4
   2  -7  -3 246.164 18.2947   4
  -2  -7   3 230.400 18.1490   4
   2  -7  -3 244.378 18.4597   5
  -2  -7   3 222.332 18.5134   7
   2  -7  -3 226.548 18.8773   7
   2  -7  -3 246.197 17.5504   2
  -2  -7   3 250.397 18.5313   5
  -2  -7   3 277.148 18.5432   2
  -2   7   3 250.082 17.5007   6
  -2   7   3 252.014 18.2673   1
   2   7  -3 252.644 18.3713   3
   2   7  -3 244.759 18.6507   1
  -2   7   3 227.210 18.5743   7
  -2   7   3 241.133 18.4553   5
  -2   7   3 264.737 18.4173   4
  -1  -7   3 62.2706 7.76324   2
   1  -7  -3 80.4471 8.56424   4
  -1  -7   3 67.7369 8.23727   5
   1  -7  -3 62.8734 7.89445   5
   1  -7  -3 83.6785 7.42867   2
  -1  -7   3 76.2261 9.05012   7
  -1  -7   3 74.2005 8.38243   4
   1  -7  -3 71.9160 8.91981   7
  -1   7   3 75.2576 8.20278   4
  -1   7   3 94.4658 7.96592   1
  -1   7   3 88.3157 8.99387   5
   1   7  -3 71.3957 8.00300   1
  -1   7   3 83.1094 9.33264   7
  -1   7   3 79.7233 7.03425   6
  -1   7   3 85.7590 6.39683   3
   1   7  -3 72.2092 7.10169   3
   0  -7   3 443.116 31.1717   4
   0  -7   3 427.635 30.9914   5
   0  -7  -3 425.737 31.5569   7
   0  -7   3 467.741 30.7036   2
   0  -7  -3 422.599 30.9921   5
   0  -7   3 432.682 31.6741   7
   0  -7   3 452.849 29.4225   3
   0  -7  -3 427.137 30.2821   2
   0   7   3 448.913 31.5454   7
   0   7  -3 483.804 30.8323   1
   0   7   3 427.950 30.4886   1
   0   7  -3 439.371 29.5050   3
   0   7   3 437.621 30.4715   6
   0   7   3 460.373 31.2811   5
   0   7   3 433.786 29.9188   3
  -1  -7  -3 41.4708 5.88601   2
   1  -7   3 54.8996 4.53773   6
  -1  -7  -3 51.9067 6.50163   5
   1  -7   3 48.6418 6.36139   5
   1  -7   3 47.6785 5.95974   2
   1  -7   3 41.3534 5.92013   4
  -1  -7  -3 48.9229 6.94631   7
   1  -7   3 43.0608 6.98522   7
  -1   7  -3 51.2195 6.04163   1
  -1   7  -3 45.5459 6.28819   5
   1   7   3 45.2954 5.88112   3
   1   7   3 35.7250 5.49177   1
   1   7   3 42.8534 6.75787   7
  -2  -7  -3 276.776 19.7079   7
   2  -7   3 263.092 19.4288   7
  -2  -7  -3 240.932 18.5823   5
   2  -7   3 258.236 16.8861   6
   2  -7   3 270.485 18.6394   2
  -2  -7  -3 259.397 18.9424   2
   2  -7   3 252.594 18.7310   5
  -2  -7  -3 268.994 18.7234   5
   2  -7   3 258.700 18.5320   4
  -2   7  -3 233.957 18.6480   5
   2   7   3 217.118 18.5098   3
   2   7   3 244.322 18.5226   1
  -2   7  -3 240.286 16.9126   6
   2   7   3 243.889 18.8280   7
  -2   7  -3 238.712 18.1913   1
  -3  -7  -3 5.32468 3.29355   7
   3  -7   3 4.25578 3.28004   2
   3  -7   3 11.5696 3.31812   5
  -3  -7  -3 5.06359 2.80546   5
   3  -7   3 12.5482 4.05144   7
   3  -7   3 5.76833 2.74288   4
   3  -7   3 8.55096 1.87974   6
  -3  -7  -3 7.72123 3.14522   5
  -3  -7  -3 13.0632 4.07734   2
  -3  -7  -3 10.6077 3.34175   7
   3   7   3 4.24772 3.09929   7
  -3   7  -3 9.19782 1.72182   6
   3   7   3 5.19417 3.61217   1
   3   7   3 5.31161 3.66047   3
  -3   7  -3 5.76261 3.14972   1
  -3   7  -3 7.38787 3.09091   5
  -4  -7  -3 44.9721 6.92685   2
   4  -7   3 48.2008 5.97246   5
   4  -7   3 48.2806 4.70545   6
   4  -7   3 48.3922 5.32894   4
  -4  -7  -3 45.1618 6.20339   7
   4  -7   3 54.7240 7.08761   7
  -4  -7  -3 51.0333 6.57632   7
  -4  -7  -3 46.7569 6.02955   5
  -4  -7  -3 53.7218 6.33989   5
  -4   7  -3 61.6996 6.78564   1
  -4   7  -3 60.4486 6.77622   5
   4   7   3 67.9771 7.02595   7
   4   7   3 69.1327 8.46804   3
  -4   7  -3 51.8875 4.46168   6
  -4   7  -3 60.8345 7.13991   7
  -4   7  -3 61.4114 4.49657   3
  -5  -7  -3 21.1668 3.92440   5
  -5  -7  -3 21.7000 3.98674   7
  -5  -7  -3 25.0749 5.39715   2
  -5  -7  -3 16.6692 3.65264   5
  -5   7  -3 17.3796 4.06420   1
  -5   7  -3 20.5199 2.84957   6
   5   7   3 31.1783 6.44601   3
  -6  -7  -3 42.3969 5.22934   5
  -6  -7  -3 41.1137 5.19425   5
  -6  -7  -3 38.2247 4.87038   7
  -6  -7  -3 38.2867 6.72856   2
   6   7   3 50.6359 8.11527   3
  -6   7  -3 51.0467 6.46143   1
  -7  -7  -3 2.30110 3.68337   2
  -7  -7  -3 4.34279 2.21334   5
   7   7   3 1.80983 4.41284   3
  -7   7  -3 4.94618 3.26972   1
  -8  -7  -3 4.98295 3.93917   2
  -8  -7  -3 4.11919 2.00738   5
   8   7   3 5.77687 4.48646   3
  -8   7  -3 3.81076 3.62451   1
  -9  -7  -3 3.44771 3.57961   2
  -9  -7  -3 7.84418 4.33626   6
  -9  -7  -3 4.49584 1.20712   5
   9   7   3 5.72584 4.57482   3
  -9  -8   3 2.36977 3.55697   2
  -9  -8   3 -0.8146 3.80611   6
  -9  -8   3 5.46652 2.09620   5
  -9   8   3 2.07543 3.30540   1
   9   8  -3 1.54829 3.91303   3
  -8  -8   3 30.4404 4.28508   5
  -8  -8   3 33.8718 5.62609   2
  -8  -8   3 25.5632 6.45098   6
   8   8  -3 24.4759 6.18828   3
  -8   8   3 28.2882 5.81916   1
  -7  -8   3 12.8438 4.09829   2
  -7  -8   3 5.94285 4.36325   6
  -7  -8   3 4.41013 2.44507   7
  -7  -8   3 7.87074 2.76712   5
  -7   8   3 4.73469 3.61396   1
   7   8  -3 3.39356 4.29545   3
  -6  -8   3 136.326 11.4545   7
  -6  -8   3 137.397 11.5255   4
  -6  -8   3 146.969 12.3139   2
  -6  -8   3 135.668 11.3203   5
  -6   8   3 139.695 12.2876   1
  -6   8   3 139.690 10.8568   6
   6   8  -3 122.524 12.9325   3
  -6   8   3 153.294 11.7384   4
  -5  -8   3 22.6448 4.60876   7
   5  -8  -3 23.5702 3.45437   4
   5  -8  -3 18.0731 4.66096   7
  -5  -8   3 29.7807 5.53431   2
  -5  -8   3 30.7978 5.00471   4
  -5  -8   3 21.8234 4.30783   5
  -5   8   3 24.0027 4.53582   4
  -5   8   3 21.4160 4.52505   7
   5   8  -3 27.8468 5.95845   3
  -5   8   3 23.8467 5.03256   1
  -5   8   3 18.3461 3.60647   6
   4  -8  -3 123.437 11.7935   5
  -4  -8   3 118.920 10.8846   7
  -4  -8   3 119.727 10.4234   4
   4  -8  -3 120.885 9.86207   4
  -4  -8   3 114.277 10.5328   2
   4  -8  -3 113.962 10.8515   7
   4  -8  -3 119.264 9.76168   2
  -4  -8   3 105.080 10.3074   5
  -4   8   3 118.047 10.6461   1
  -4   8   3 120.612 10.5884   4
  -4   8   3 140.563 11.2125   7
  -4   8   3 115.768 9.38721   6
   4   8  -3 109.924 11.0252   3
  -3  -8   3 33.3388 5.51412   2
  -3  -8   3 41.7946 5.82866   5
  -3  -8   3 45.3185 6.10780   4
   3  -8  -3 46.6069 6.64265   7
   3  -8  -3 36.6448 4.91695   2
  -3  -8   3 44.9024 6.67082   7
   3  -8  -3 40.5413 5.64251   4
  -3   8   3 24.3304 4.95423   4
   3   8  -3 35.5750 5.95428   3
  -3   8   3 32.2049 5.67557   7
  -3   8   3 40.6252 4.69859   6
  -3   8   3 29.2717 5.43355   1
  -2  -8   3 543.633 36.4313   4
   2  -8  -3 529.740 35.4817   2
  -2  -8   3 530.522 36.0917   2
   2  -8  -3 547.020 37.2592   7
   2  -8  -3 508.847 36.2002   4
  -2  -8   3 540.058 36.4497   5
  -2  -8   3 506.000 37.0441   7
  -2   8   3 565.627 37.3079   7
  -2   8   3 506.854 36.0353   1
   2   8  -3 503.269 35.9873   3
  -2   8   3 486.102 35.1414   6
   2   8  -3 552.235 36.6095   1
  -2   8   3 520.344 36.5873   5
  -2   8   3 505.683 36.2418   4
   1  -8  -3 32.7811 4.54436   2
   1  -8  -3 24.4755 4.90308   5
  -1  -8   3 26.2048 5.00054   4
   1  -8  -3 30.1573 5.96216   7
  -1  -8   3 19.0096 4.99714   7
  -1  -8   3 21.4551 4.54446   2
   1  -8  -3 21.9436 4.57113   4
  -1  -8   3 21.4025 4.69456   5
  -1   8   3 25.4662 4.99550   5
  -1   8   3 22.5091 4.35225   4
  -1   8   3 25.3562 5.25762   7
  -1   8   3 21.5637 3.85285   6
   1   8  -3 20.7108 4.48638   1
  -1   8   3 22.8019 3.27802   3
   1   8  -3 15.4564 3.77530   3
  -1   8   3 22.3512 4.59135   1
   0  -8  -3 145.574 12.6722   4
   0  -8   3 155.298 13.4818   7
   0  -8   3 138.221 11.9983   2
   0  -8  -3 138.103 13.0698   7
   0  -8   3 150.707 10.7517   3
   0  -8  -3 148.881 12.6982   5
   0  -8   3 154.584 12.8367   4
   0  -8   3 146.580 12.5815   5
   0  -8  -3 163.262 12.0632   2
   0   8   3 142.640 11.9750   1
   0   8  -3 151.220 11.0012   3
   0   8   3 139.408 11.2500   3
   0   8   3 158.573 13.0741   7
   0   8   3 166.157 12.1345   6
   0   8  -3 145.607 12.1211   1
   1  -8   3 35.0598 5.73671   5
   1  -8   3 33.5501 5.32230   2
  -1  -8  -3 38.9900 6.09644   5
  -1  -8  -3 42.1547 5.92704   2
   1  -8   3 46.8295 7.00243   7
  -1  -8  -3 34.1869 6.36585   7
   1  -8   3 33.6833 5.96885   4
  -1  -8  -3 26.4890 5.26727   5
   1   8   3 45.1038 5.78683   1
  -1   8  -3 44.3111 6.28038   5
   1   8   3 50.1638 6.78752   7
  -1   8  -3 50.2636 6.00714   1
   1   8   3 54.5778 6.11453   3
  -2  -8  -3 319.216 24.0664   7
   2  -8   3 325.214 23.4900   5
   2  -8   3 313.889 21.6848   6
  -2  -8  -3 314.714 23.4949   5
  -2  -8  -3 325.309 23.6917   5
  -2  -8  -3 332.884 23.6688   2
   2  -8   3 320.530 23.3677   4
   2  -8   3 333.960 23.4140   2
   2  -8   3 345.549 24.4825   7
  -2   8  -3 323.666 23.1562   1
   2   8   3 294.455 23.2220   1
   2   8   3 321.442 24.1635   7
  -2   8  -3 338.063 23.8248   5
   2   8   3 346.240 23.8647   3
  -3  -8  -3 28.7129 5.46987   7
  -3  -8  -3 35.6679 5.79173   5
   3  -8   3 34.6821 5.09731   4
   3  -8   3 33.2744 5.58743   2
   3  -8   3 48.8094 7.10400   7
  -3  -8  -3 42.2053 6.36336   2
   3  -8   3 43.0850 3.85179   6
  -3  -8  -3 34.8517 5.57323   5
  -3   8  -3 41.8169 5.65948   1
   3   8   3 43.2050 6.82613   3
  -3   8  -3 38.1507 5.77313   5
   3   8   3 43.9198 6.42172   7
  -3   8  -3 38.0150 3.63775   6
   3   8   3 54.6876 6.94235   1
   4  -8   3 160.981 11.7976   4
  -4  -8  -3 144.626 12.5522   7
  -4  -8  -3 154.338 12.4161   5
  -4  -8  -3 153.369 12.4750   5
   4  -8   3 135.051 12.7970   7
  -4  -8  -3 153.893 13.1442   2
  -4   8  -3 137.143 12.1282   1
   4   8   3 161.755 13.6903   3
  -4   8  -3 154.437 10.5491   6
   4   8   3 152.369 12.4962   7
  -5  -8  -3 14.2278 4.35275   2
  -5  -8  -3 19.4750 4.10808   7
  -5  -8  -3 14.0660 3.49611   5
   5   8   3 8.68335 4.57171   3
  -5   8  -3 15.3026 4.01322   1
  -6  -8  -3 68.8940 7.12177   7
  -6  -8  -3 68.1595 8.68644   2
  -6  -8  -3 68.5353 7.07011   5
  -6   8  -3 60.8739 7.79806   1
   6   8   3 67.6869 9.41366   3
  -7  -8  -3 23.3367 3.60808   5
  -7  -8  -3 14.8251 5.09076   2
  -7   8  -3 23.8263 4.96792   1
   7   8   3 10.2196 5.03623   3
  -8  -8  -3 11.9083 2.67213   5
  -8  -8  -3 11.6411 4.65813   2
  -8   8  -3 12.2526 4.16284   1
   8   8   3 6.36441 4.74854   3
  -8  -9   3 12.9166 3.40693   5
  -8  -9   3 11.7497 4.38376   2
  -8  -9   3 18.5441 5.76035   6
  -8   9   3 9.37936 4.59214   1
   8   9  -3 6.90654 4.95592   3
  -7  -9   3 4.62842 2.83484   7
  -7  -9   3 -1.0885 2.47054   5
  -7  -9   3 3.12658 3.62668   2
   7   9  -3 -1.0387 3.76940   3
  -7   9   3 4.00838 4.46446   1
  -6  -9   3 117.630 10.2105   4
  -6  -9   3 129.320 11.2065   2
  -6  -9   3 110.622 10.1869   7
  -6  -9   3 118.941 10.0684   5
  -6   9   3 104.186 9.22997   6
  -6   9   3 117.726 10.1308   4
  -6   9   3 106.357 11.0637   1
   6   9  -3 94.0123 11.8625   3
  -5  -9   3 43.8583 6.39343   2
  -5  -9   3 50.1612 6.26449   5
  -5  -9   3 39.8946 5.88158   4
  -5  -9   3 49.9289 6.54244   7
   5  -9  -3 43.8592 5.00675   4
  -5   9   3 38.5553 6.55376   1
  -5   9   3 38.1251 6.04465   7
   5   9  -3 42.0888 7.41583   3
  -5   9   3 41.8295 5.06434   6
  -5   9   3 34.8257 5.70825   4
  -4  -9   3 62.6306 7.55062   2
   4  -9  -3 59.5411 6.56595   4
   4  -9  -3 62.7431 8.00970   7
  -4  -9   3 58.6347 7.72360   7
  -4  -9   3 64.5230 7.23714   4
  -4  -9   3 59.3213 7.08526   5
   4  -9  -3 52.9007 6.26339   2
  -4   9   3 50.3310 7.11355   7
   4   9  -3 47.5326 7.57679   3
  -4   9   3 39.1626 6.27996   4
  -4   9   3 38.0476 5.30340   6
  -4   9   3 46.7440 6.93595   1
   3  -9  -3 29.6393 5.95473   7
  -3  -9   3 19.8374 4.65345   2
  -3  -9   3 19.6940 4.63271   4
   3  -9  -3 21.5545 4.05378   2
   3  -9  -3 17.6706 4.25878   5
  -3  -9   3 24.9646 4.83351   5
   3  -9  -3 24.5663 4.79245   4
  -3  -9   3 11.7275 4.43940   7
  -3   9   3 25.7712 3.88745   6
   3   9  -3 18.4770 4.88100   1
  -3   9   3 27.9978 5.16781   1
  -3   9   3 28.3440 5.24727   4
   3   9  -3 27.8367 5.69597   3
  -3   9   3 20.3291 4.93996   7
  -2  -9   3 426.723 30.1863   2
   2  -9  -3 435.764 31.3415   7
  -2  -9   3 430.045 30.4928   5
  -2  -9   3 450.683 31.5332   7
   2  -9  -3 458.196 29.6806   2
   2  -9  -3 444.902 30.4678   4
  -2  -9   3 432.212 30.4343   4
  -2   9   3 419.939 29.2462   6
  -2   9   3 431.845 28.4098   3
  -2   9   3 432.788 30.2619   4
   2   9  -3 401.066 30.3631   1
   2   9  -3 400.133 29.8836   3
  -2   9   3 401.348 29.9294   1
  -2   9   3 433.613 31.0180   7
   1  -9  -3 45.6337 6.61272   5
  -1  -9   3 42.4228 6.58706   4
  -1  -9   3 37.7604 6.80183   7
  -1  -9   3 49.0588 6.91357   5
  -1  -9   3 33.2897 5.71221   2
   1  -9  -3 38.5005 7.07279   7
   1  -9  -3 31.0182 5.95972   4
   1  -9  -3 45.5534 5.90347   2
  -1   9   3 45.9184 6.20151   1
   1   9  -3 44.6668 5.58908   3
   1   9  -3 54.6860 6.73481   1
  -1   9   3 39.6926 5.36577   6
  -1   9   3 53.3846 4.65210   3
  -1   9   3 43.8805 6.91445   7
   0  -9   3 17.9309 2.96679   3
   0  -9  -3 12.4519 4.08904   4
   0  -9  -3 13.7938 4.41287   5
   0  -9  -3 20.4581 4.21817   2
   0  -9  -3 18.2679 5.24840   7
   0  -9   3 20.0060 5.47801   7
   0  -9   3 11.7178 4.37381   4
   0  -9   3 16.1047 4.28282   2
   0  -9   3 10.2346 3.97758   5
   0   9   3 21.1364 4.58760   6
   0   9   3 14.7477 4.13195   1
   0   9   3 11.8916 3.40212   3
   0   9  -3 15.2486 4.01278   1
   0   9  -3 26.2653 3.46671   3
   0   9   3 11.6255 4.61661   7
  -1  -9  -3 13.6438 4.37010   4
   1  -9   3 22.2011 4.73897   4
  -1  -9  -3 15.5349 4.11135   2
  -1  -9  -3 24.8573 4.97701   5
  -1  -9  -3 13.0984 4.09522   5
  -1  -9  -3 21.9165 5.28248   7
   1  -9   3 22.6662 4.57019   2
   1  -9   3 27.5440 5.97856   7
   1  -9   3 15.9704 4.40576   5
  -1   9  -3 20.6359 4.25004   1
   1   9   3 15.7155 4.09167   1
   1   9   3 18.8526 4.24888   3
   1   9   3 16.9227 4.84066   7
   2  -9   3 34.6621 6.54575   7
   2  -9   3 36.1077 5.79208   2
  -2  -9  -3 30.0721 5.45992   5
   2  -9   3 35.4884 5.72354   4
  -2  -9  -3 24.4516 5.44039   2
   2  -9   3 35.0618 5.92941   5
  -2  -9  -3 36.4993 6.44409   7
  -2  -9  -3 28.8556 5.64376   5
  -2   9  -3 60.3010 6.55579   1
  -2   9  -3 54.5888 7.04124   5
   2   9   3 49.3724 6.48293   1
   2   9   3 56.4159 7.21963   7
   2   9   3 43.4633 6.19785   3
  -3  -9  -3 42.5324 6.72021   5
  -3  -9  -3 56.8481 7.76602   7
  -3  -9  -3 54.0560 7.22434   5
   3  -9   3 56.1442 6.84088   4
   3  -9   3 66.7360 8.57854   7
  -3  -9  -3 58.0092 7.51533   2
   3  -9   3 64.0388 7.58230   2
   3   9   3 67.7592 8.12058   7
   3   9   3 54.2307 7.34108   1
  -3   9  -3 63.7719 7.42043   1
  -3   9  -3 58.1052 4.90686   6
   3   9   3 59.0942 7.91538   3
  -4  -9  -3 180.565 15.8548   2
  -4  -9  -3 190.752 15.3097   5
   4  -9   3 200.254 16.1954   7
  -4  -9  -3 190.132 15.8010   7
   4  -9   3 184.595 15.4285   2
   4  -9   3 190.959 14.7047   4
   4   9   3 183.881 16.1109   3
  -4   9  -3 220.696 15.5577   1
   4   9   3 194.307 15.5499   7
  -4   9  -3 206.216 13.5122   6
  -5  -9  -3 4.96550 2.90772   5
  -5  -9  -3 11.8407 4.32450   2
  -5  -9  -3 9.28336 3.86721   7
  -5   9  -3 5.25203 3.30056   1
   5   9   3 4.05110 4.12020   3
  -6  -9  -3 40.8123 6.83330   2
  -6  -9  -3 37.6965 5.26143   5
  -6  -9  -3 38.6727 5.50402   7
   6   9   3 33.2343 6.90635   3
  -6   9  -3 29.1796 5.48063   1
  -7  -9  -3 0.51481 2.35447   5
  -7  -9  -3 5.90841 4.23039   2
  -7   9  -3 6.73473 3.87072   1
   7   9   3 4.19662 4.69061   3
  -8  -9  -3 13.4468 4.66097   2
  -8  -9  -3 5.15533 2.52821   5
  -8   9  -3 5.99701 3.76986   1
   8   9   3 13.3859 5.36652   3
  -8 -10   3 35.1361 4.73898   5
  -8 -10   3 40.0585 6.63512   2
  -8 -10   3 26.7476 6.54704   6
   8  10  -3 35.5879 7.11428   3
  -8  10   3 23.0020 5.33904   1
  -7 -10   3 16.2514 4.98286   2
  -7 -10   3 7.25409 3.54735   7
  -7 -10   3 9.43062 3.16360   5
  -7  10   3 6.05634 4.36275   1
   7  10  -3 9.32329 4.67327   3
  -6 -10   3 28.7939 5.06620   5
  -6 -10   3 36.0452 6.03009   2
  -6 -10   3 26.4651 5.01304   4
  -6 -10   3 33.9875 5.74880   7
  -6  10   3 26.9108 5.66308   1
   6  10  -3 31.0556 6.56837   3
  -6  10   3 26.1527 5.14891   4
  -5 -10   3 14.6159 4.56626   2
   5 -10  -3 19.8951 3.64957   4
  -5 -10   3 22.5430 4.56067   5
  -5 -10   3 16.7641 4.58199   7
  -5 -10   3 18.0744 4.55329   4
  -5  10   3 16.6790 4.50263   7
  -5  10   3 16.1832 4.33100   4
  -5  10   3 14.1943 4.61414   1
  -5  10   3 17.4570 3.59464   6
   5  10  -3 11.0049 4.84942   3
  -4 -10   3 115.305 11.4182   7
   4 -10  -3 147.210 12.3209   7
  -4 -10   3 149.120 11.7677   4
   4 -10  -3 127.491 10.8340   4
  -4 -10   3 117.113 11.1092   5
  -4 -10   3 128.632 11.4228   2
   4 -10  -3 137.158 10.8367   2
  -4  10   3 126.759 10.1539   6
   4  10  -3 122.940 11.7274   3
  -4  10   3 116.985 11.2850   1
  -4  10   3 110.117 11.3013   7
  -4  10   3 128.165 11.2815   4
  -3 -10   3 31.5684 5.66800   4
  -3 -10   3 25.6059 5.21832   5
   3 -10  -3 23.0975 4.29514   2
   3 -10  -3 34.2509 6.53228   7
   3 -10  -3 29.9525 5.41463   4
  -3 -10   3 30.2555 5.61169   2
  -3 -10   3 35.8591 6.22630   7
  -3  10   3 27.4209 3.03119   3
  -3  10   3 25.9663 5.50456   7
   3  10  -3 27.7701 5.57020   3
  -3  10   3 23.5916 4.93666   4
   3  10  -3 36.3951 6.11160   1
  -3  10   3 29.3943 4.28502   6
  -3  10   3 28.8973 5.37262   1
   2 -10  -3 204.514 16.9509   7
   2 -10  -3 199.957 14.7652   2
  -2 -10   3 192.152 16.3577   7
  -2 -10   3 170.209 15.3738   5
   2 -10  -3 180.310 15.4471   5
  -2 -10   3 181.981 15.2677   2
  -2 -10   3 165.931 15.2327   4
   2 -10  -3 195.773 15.6030   4
   2  10  -3 207.353 15.2251   3
  -2  10   3 204.980 13.4551   3
   2  10  -3 197.538 15.6189   1
  -2  10   3 218.408 16.6721   7
  -2  10   3 171.203 14.9871   1
  -2  10   3 196.975 14.4356   6
   1 -10  -3 117.591 12.1420   7
  -1 -10   3 100.593 11.2645   7
   1 -10  -3 95.5860 8.82795   2
   1 -10  -3 103.959 9.39060   4
  -1 -10   3 78.1381 9.37169   2
  -1 -10   3 107.592 10.7248   4
   1 -10  -3 83.5190 9.88904   5
  -1 -10   3 80.7355 9.89150   5
  -1  10   3 79.7809 10.0939   7
   1  10  -3 83.8581 9.60776   1
  -1  10   3 85.2962 8.74509   1
  -1  10   3 92.7032 8.30800   6
  -1  10   3 91.6735 7.51420   3
   1  10  -3 91.8143 8.23347   3
   0 -10   3 201.210 15.8230   2
   0 -10   3 215.768 16.3974   5
   0 -10  -3 180.386 16.6961   7
   0 -10  -3 209.217 15.6053   2
   0 -10   3 206.634 16.3673   4
   0 -10  -3 207.108 16.3486   4
   0 -10   3 177.403 16.7360   7
   0 -10  -3 201.788 16.3490   5
   0  10   3 202.203 16.7776   7
   0  10   3 175.075 15.2800   1
   0  10   3 213.389 14.9013   3
   0  10  -3 199.161 15.7122   1
   0  10  -3 208.650 14.3154   3
   0  10   3 200.180 15.3999   6
   1 -10   3 53.1431 6.93552   2
  -1 -10  -3 52.5056 8.12382   5
  -1 -10  -3 44.0173 6.95043   5
   1 -10   3 53.0359 8.16706   7
   1 -10   3 58.3382 7.75064   5
  -1 -10  -3 51.1222 6.75565   2
   1 -10   3 50.7049 7.18806   4
  -1 -10  -3 56.0250 8.23223   7
  -1 -10  -3 47.0426 7.26283   4
  -1  10  -3 59.7176 7.16726   1
   1  10   3 53.6929 7.95925   7
   1  10   3 61.9992 7.20863   1
   1  10   3 58.1454 6.73993   3
  -2 -10  -3 458.486 33.0477   2
   2 -10   3 468.741 33.2534   5
   2 -10   3 452.801 32.8408   4
  -2 -10  -3 468.618 33.2888   5
   2 -10   3 440.934 33.8142   7
  -2 -10  -3 443.455 33.3742   4
  -2 -10  -3 520.434 34.2663   7
   2 -10   3 452.102 32.7995   2
  -2 -10  -3 459.183 33.2188   5
   2  10   3 482.651 33.0548   1
   2  10   3 483.881 33.6311   7
   2  10   3 471.237 32.7730   3
  -2  10  -3 486.028 32.8390   1
   3 -10   3 54.3926 6.80537   2
  -3 -10  -3 46.3782 6.69216   5
   3 -10   3 40.3412 5.87268   4
  -3 -10  -3 44.4960 7.00432   7
  -3 -10  -3 41.8094 6.59926   2
   3 -10   3 48.9274 7.40517   7
   3  10   3 48.0336 6.90774   7
  -3  10  -3 43.0680 4.23489   6
   3  10   3 37.9533 6.40892   3
   3  10   3 38.6794 6.32511   1
  -3  10  -3 39.1158 6.15082   1
   4 -10   3 35.0391 5.71865   2
   4 -10   3 44.6935 7.02766   7
  -4 -10  -3 36.6439 6.29848   2
  -4 -10  -3 33.0870 5.74066   5
  -4 -10  -3 43.7383 6.55742   7
   4 -10   3 52.6375 5.87150   4
   4  10   3 23.0871 5.30851   7
  -4  10  -3 39.5820 5.89226   1
   4  10   3 29.2244 6.49296   3
  -5 -10  -3 6.92551 3.83520   7
  -5 -10  -3 10.6704 4.38889   2
  -5 -10  -3 8.41396 3.44408   5
   5  10   3 8.52556 4.95846   3
  -5  10  -3 9.91593 3.77818   1
  -6 -10  -3 45.8312 7.40487   2
  -6 -10  -3 39.9787 5.93213   4
  -6 -10  -3 49.9352 6.31804   7
  -6 -10  -3 52.5501 6.44509   5
   6  10   3 37.6421 7.09731   3
  -6  10  -3 35.7659 6.08829   1
  -7 -10  -3 10.0549 4.85041   2
  -7 -10  -3 7.61825 3.06137   5
  -7 -10  -3 13.9899 3.52223   7
  -7  10  -3 4.90557 3.83153   1
   7  10   3 11.6585 5.30007   3
  -8 -10  -3 45.0013 5.67432   5
  -8 -10  -3 51.6473 7.76023   2
  -8  10  -3 60.3909 7.15116   1
   8  10   3 48.6881 8.22710   3
  -8 -11   3 15.7474 4.94291   2
  -8 -11   3 15.6503 3.82801   5
  -8 -11   3 22.7884 6.15996   6
   8  11  -3 17.5996 5.64670   3
  -8  11   3 15.2743 4.60436   1
  -7 -11   3 6.07064 3.83845   2
  -7 -11   3 6.19156 3.37509   7
  -7 -11   3 5.15730 3.00253   5
  -7  11   3 -1.1824 3.39315   1
   7  11  -3 1.11290 4.27103   3
  -6 -11   3 20.7194 5.51630   2
  -6 -11   3 13.7126 4.35152   7
  -6 -11   3 21.5532 4.67960   5
  -6 -11   3 25.3415 5.03268   4
   6  11  -3 16.7614 5.54174   3
  -6  11   3 12.9865 4.37540   4
  -6  11   3 12.6661 4.49790   1
   5 -11  -3 7.57241 3.07303   4
  -5 -11   3 5.71132 4.06493   7
   5 -11  -3 10.4829 3.47127   2
  -5 -11   3 7.20904 3.94101   2
  -5 -11   3 8.18541 3.85595   5
  -5 -11   3 10.4450 3.82164   4
  -5  11   3 7.36422 3.97634   7
  -5  11   3 12.5993 3.89513   4
   5  11  -3 10.0776 4.57009   3
  -5  11   3 7.95015 3.20172   6
  -5  11   3 2.91128 3.84461   1
   4 -11  -3 141.854 12.2245   4
   4 -11  -3 153.476 12.0349   2
  -4 -11   3 132.036 12.3104   2
  -4 -11   3 160.275 12.8362   5
   4 -11  -3 145.561 13.4326   7
  -4 -11   3 127.257 12.9204   7
  -4 -11   3 129.560 12.2928   4
  -4  11   3 154.532 12.8434   1
  -4  11   3 143.086 12.4285   4
  -4  11   3 156.755 11.3414   6
   4  11  -3 128.342 12.6186   3
  -4  11   3 165.157 13.3215   7
  -3 -11   3 -0.3119 3.36014   2
   3 -11  -3 1.20198 3.72858   7
  -3 -11   3 1.52778 3.58714   7
   3 -11  -3 0.83730 3.20776   4
  -3 -11   3 2.35799 3.22339   5
   3 -11  -3 5.98611 3.37319   2
  -3 -11   3 -0.4167 3.17672   4
  -3  11   3 0.48448 3.38618   7
   3  11  -3 4.23374 3.95896   3
   3  11  -3 -0.9126 3.44427   1
  -3  11   3 0.07677 3.39072   1
  -3  11   3 0.56782 2.55758   6
   2 -11  -3 237.983 19.2120   4
   2 -11  -3 247.787 18.4487   2
  -2 -11   3 225.150 19.3302   5
   2 -11  -3 256.839 20.3650   7
  -2 -11   3 242.862 20.1726   7
  -2 -11   3 249.923 19.5320   4
  -2 -11   3 251.686 19.0826   2
   2 -11  -3 254.537 19.3423   5
  -2  11   3 245.845 17.0816   3
  -2  11   3 254.548 19.9801   7
   2  11  -3 276.987 18.9500   3
   2  11  -3 260.355 19.4357   1
  -2  11   3 250.516 18.2372   6
  -2  11   3 231.740 18.8252   1
   1 -11  -3 19.3372 5.06188   5
  -1 -11   3 40.9059 6.15094   5
   1 -11  -3 21.3075 5.10643   4
  -1 -11   3 24.4650 5.32852   2
   1 -11  -3 21.7680 4.49232   2
   1 -11  -3 30.9133 6.54089   7
  -1 -11   3 23.9312 6.20182   7
  -1 -11   3 32.0155 5.92508   4
  -1  11   3 22.1259 5.05463   1
  -1  11   3 26.1375 4.59551   6
   1  11  -3 31.7725 4.80466   3
   1  11  -3 31.5623 5.63008   1
  -1  11   3 25.8975 5.86925   7
  -1  11   3 30.6766 3.83788   3
   0 -11  -3 4.04962 3.42387   5
   0 -11  -3 -1.3398 3.64290   7
   0 -11   3 1.80123 4.08089   7
   0 -11   3 4.37438 3.47719   2
   0 -11  -3 1.75346 3.42258   4
   0 -11  -3 7.76491 3.53977   2
   0 -11   3 3.59992 3.59778   4
   0 -11   3 0.57936 3.28158   5
   0  11   3 6.61928 3.65581   1
   0  11  -3 1.57134 2.18921   3
   0  11   3 10.1804 4.67673   7
   0  11  -3 3.37921 3.33946   1
   0  11   3 -2.0414 2.43364   3
   1 -11   3 48.6337 7.72721   5
   1 -11   3 74.9407 8.80816   4
  -1 -11  -3 57.0375 8.30110   4
   1 -11   3 61.0377 7.70611   2
   1 -11   3 66.9123 9.24020   7
  -1 -11  -3 63.6963 8.04995   2
  -1 -11  -3 60.8538 8.77904   7
  -1 -11  -3 60.9824 8.11475   5
   1  11   3 65.8176 8.09634   1
  -1  11  -3 68.2284 7.77078   1
   1  11   3 72.9501 7.59032   3
   1  11   3 62.8876 8.79638   7
  -2 -11  -3 21.0376 4.92715   5
  -2 -11  -3 15.8325 4.93868   7
  -2 -11  -3 10.5397 4.69332   4
   2 -11   3 15.5019 5.26716   7
  -2 -11  -3 23.3458 5.19360   2
   2 -11   3 15.4442 4.50740   4
   2 -11   3 13.9594 4.49635   2
   2  11   3 17.5713 4.63841   3
   2  11   3 14.2765 4.71684   7
  -2  11  -3 11.7042 4.28701   1
   2  11   3 16.6406 4.49676   1
   3 -11   3 6.60165 3.63400   4
  -3 -11  -3 9.49306 4.08881   7
   3 -11   3 6.35067 3.55965   2
  -3 -11  -3 4.66164 3.68254   2
   3 -11   3 8.49117 4.30938   7
  -3 -11  -3 6.60958 3.69586   4
  -3 -11  -3 2.49626 3.56458   5
   3  11   3 -0.9119 3.37427   3
   3  11   3 7.75864 4.04028   1
   3  11   3 3.08229 4.00257   7
  -3  11  -3 6.86929 3.66155   1
   4 -11   3 9.26528 4.25516   2
  -4 -11  -3 9.02471 3.88982   4
  -4 -11  -3 3.65680 3.96686   7
  -4 -11  -3 6.96518 4.22052   2
   4 -11   3 7.60523 3.29170   4
  -4 -11  -3 9.67021 3.68150   5
   4 -11   3 3.15997 3.46654   7
   4  11   3 27.5877 5.76662   3
  -4  11  -3 23.4124 4.90623   1
  -5 -11  -3 -1.4446 2.79651   5
  -5 -11  -3 1.69081 3.39677   4
  -5 -11  -3 2.47806 3.54628   2
  -5 -11  -3 1.58764 3.52069   7
  -5  11  -3 2.41567 3.25194   1
   5  11   3 0.47522 3.84797   3
  -6 -11  -3 18.0122 4.08216   5
  -6 -11  -3 7.79291 3.78774   4
  -6 -11  -3 9.43331 4.44869   2
  -6 -11  -3 9.32956 3.55302   7
  -6  11  -3 8.59934 3.88923   1
   6  11   3 11.4740 5.40919   3
  -7 -11  -3 18.4452 5.26247   2
  -7 -11  -3 12.1723 3.70632   5
  -7 -11  -3 14.4196 3.73693   7
  -7  11  -3 13.8413 4.04571   1
   7  11   3 16.4485 5.60934   3
  -7 -12   3 1.10094 2.70740   5
  -7 -12   3 0.05207 3.10715   7
  -7 -12   3 12.4622 4.41636   2
  -7  12   3 -1.1898 3.46939   1
   7  12  -3 1.92756 4.19792   3
  -6 -12   3 1.76026 3.92073   7
  -6 -12   3 5.39950 3.55430   5
  -6 -12   3 3.72477 3.76670   2
  -6 -12   3 3.53962 3.40927   4
   6  12  -3 9.19565 4.97336   3
  -6  12   3 10.3127 4.38906   1
  -5 -12   3 -3.8053 3.67335   2
  -5 -12   3 -2.2334 3.37559   4
  -5 -12   3 3.64735 3.72720   5
  -5 -12   3 -3.8580 3.57343   7
   5 -12  -3 3.37433 2.86004   2
  -5  12   3 -1.6042 3.39939   1
   5  12  -3 -1.2379 3.99045   3
  -5  12   3 2.30521 3.35078   7
   4 -12  -3 56.1103 7.16346   2
  -4 -12   3 58.9215 8.85417   7
   4 -12  -3 48.5287 8.24680   7
  -4 -12   3 50.1134 7.77677   5
  -4 -12   3 62.6186 8.32070   4
  -4 -12   3 53.9165 7.69526   2
   4 -12  -3 54.6056 7.49747   4
  -4  12   3 83.7896 8.69952   1
  -4  12   3 65.4121 8.31301   7
   4  12  -3 88.2929 9.32313   3
  -4  12   3 67.3058 6.24936   6
  -3 -12   3 30.8286 6.16368   7
   3 -12  -3 20.7796 5.63973   7
  -3 -12   3 26.2867 5.61937   5
  -3 -12   3 30.6054 5.70674   4
   3 -12  -3 27.6115 4.91343   2
  -3 -12   3 32.7632 5.84769   2
   3 -12  -3 19.2420 4.68897   4
  -3  12   3 22.6402 5.80613   7
   3  12  -3 17.2988 5.24855   1
  -3  12   3 21.1256 5.16120   1
   3  12  -3 19.3029 5.08295   3
  -3  12   3 18.1391 3.75378   6
  -2 -12   3 47.9329 7.90249   7
  -2 -12   3 45.2491 6.98162   4
  -2 -12   3 48.0546 6.76993   2
   2 -12  -3 42.2106 5.86426   2
  -2 -12   3 41.9658 6.69914   5
   2 -12  -3 43.2701 7.24306   7
   2 -12  -3 41.2424 6.65545   4
  -2  12   3 30.8507 5.90823   1
   2  12  -3 30.2299 5.48961   3
  -2  12   3 26.8108 6.18725   7
   2  12  -3 22.7131 5.50383   1
  -2  12   3 28.8942 5.10930   6
   1 -12  -3 15.5705 5.00983   7
   1 -12  -3 10.6132 4.01804   5
  -1 -12   3 12.1765 4.56291   4
   1 -12  -3 12.2715 4.57902   4
  -1 -12   3 12.1043 4.74991   5
   1 -12  -3 11.4892 3.74010   2
  -1 -12   3 17.2158 4.73814   2
  -1 -12   3 10.2037 4.82725   7
  -1  12   3 10.8333 2.82680   3
   1  12  -3 13.1677 3.65012   3
   1  12  -3 9.96274 4.11428   1
  -1  12   3 9.28407 4.03284   1
  -1  12   3 8.09729 3.35112   6
  -1  12   3 5.99148 4.31553   7
   0 -12  -3 62.6232 9.16723   7
   0 -12   3 65.5045 8.28956   2
   0 -12  -3 77.1176 9.26743   4
   0 -12   3 82.3364 9.57763   5
   0 -12   3 70.1345 8.90546   4
   0 -12  -3 66.1502 8.27997   2
   0 -12  -3 84.8727 9.43567   5
   0 -12   3 67.5553 9.78757   7
   0  12   3 74.9907 8.74582   1
   0  12  -3 68.2574 8.54430   1
   0  12  -3 78.4088 6.40949   3
   0  12   3 56.2441 8.94657   7
   0  12   3 66.4611 7.25783   3
   1 -12   3 16.0454 4.79958   4
  -1 -12  -3 16.2629 4.58386   5
  -1 -12  -3 10.4648 4.77897   4
   1 -12   3 14.3000 4.69396   5
  -1 -12  -3 14.0804 5.24210   7
   1 -12   3 17.2778 5.23878   7
  -1 -12  -3 17.8255 4.68302   2
   1 -12   3 14.1609 4.68849   2
   1  12   3 10.1152 4.02620   1
  -1  12  -3 13.7105 4.50966   1
   1  12   3 20.2542 5.43021   7
   1  12   3 18.9598 4.38708   3
  -2 -12  -3 176.729 15.2662   5
  -2 -12  -3 179.877 14.9534   2
  -2 -12  -3 193.180 15.6013   4
  -2 -12  -3 179.153 16.0593   7
   2 -12   3 184.004 14.9900   2
   2 -12   3 159.911 14.8195   4
   2 -12   3 169.543 15.9704   7
  -2  12  -3 189.849 14.8095   1
   2  12   3 196.023 15.2685   1
   2  12   3 201.591 16.0310   7
   2  12   3 171.945 14.7036   3
   3 -12   3 50.3569 7.95532   7
   3 -12   3 42.6881 6.37664   4
  -3 -12  -3 43.6177 7.50770   7
  -3 -12  -3 40.5508 6.66750   2
   3 -12   3 41.5663 6.32223   2
  -3 -12  -3 47.9214 7.13670   5
  -3 -12  -3 52.8458 7.33389   4
   3  12   3 52.1943 7.59419   3
   3  12   3 37.8943 6.71728   1
  -3  12  -3 38.4128 6.36635   1
   3  12   3 47.0841 6.94107   7
  -4 -12  -3 37.4269 6.13073   5
  -4 -12  -3 34.5669 6.21558   2
   4 -12   3 35.0245 6.74843   7
   4 -12   3 33.3214 5.28724   4
   4 -12   3 48.4591 6.55988   2
  -4 -12  -3 28.8997 5.61602   4
  -4 -12  -3 28.2819 6.21755   7
   4  12   3 25.5749 6.20352   3
  -4  12  -3 15.7074 5.02891   1
  -5 -12  -3 14.2422 4.57467   7
  -5 -12  -3 6.69378 3.51635   5
  -5 -12  -3 11.0395 4.01636   4
  -5 -12  -3 6.14459 4.05733   2
   5  12   3 6.27463 4.63006   3
  -5  12  -3 5.99624 3.94612   1
  -6 -12  -3 1.14167 3.16496   7
  -6 -12  -3 7.67934 4.27896   2
  -6 -12  -3 9.02700 3.67174   4
  -6 -12  -3 7.88030 3.45083   5
  -6  12  -3 7.05003 3.87233   1
   6  12   3 4.97962 4.37810   3
  -7 -12  -3 -1.5583 2.64370   5
  -7 -12  -3 3.21144 3.97518   2
  -7 -12  -3 1.61689 3.02404   7
  -7  12  -3 0.15834 3.75233   1
   7  12   3 -3.0633 3.62348   3
  -7 -13   3 0.44122 2.83309   5
  -7 -13   3 8.44793 3.62654   7
  -7 -13   3 -1.4682 3.59682   2
   7  13  -3 -2.6601 4.07994   3
  -7  13   3 3.27226 3.81956   1
  -6 -13   3 9.89784 3.95543   5
  -6 -13   3 5.78579 4.02419   2
  -6 -13   3 12.2419 4.45477   4
  -6 -13   3 8.81806 4.44135   7
  -6  13   3 4.94618 4.65758   1
   6  13  -3 16.9181 5.00809   3
  -5 -13   3 7.51649 3.97843   7
  -5 -13   3 13.0080 4.55958   5
  -5 -13   3 11.4400 4.44077   2
  -5 -13   3 12.8708 4.49106   4
  -5  13   3 10.8281 4.52605   1
   5  13  -3 7.00542 4.63267   3
   4 -13  -3 23.1913 6.35986   7
   4 -13  -3 44.2097 6.47396   4
  -4 -13   3 40.5656 6.92071   4
   4 -13  -3 42.6364 5.95082   2
  -4 -13   3 23.6242 5.55573   5
  -4 -13   3 31.4091 6.49884   2
  -4 -13   3 35.6760 7.09444   7
  -4  13   3 24.5844 5.89436   7
  -4  13   3 47.1514 6.75062   1
   4  13  -3 27.3913 6.36579   3
   3 -13  -3 1.90643 4.19423   7
  -3 -13   3 13.0175 4.40114   5
  -3 -13   3 7.38024 4.41199   4
  -3 -13   3 10.6471 5.00344   7
  -3 -13   3 5.17265 3.77158   2
   3 -13  -3 5.94960 3.83407   4
   3 -13  -3 2.97231 3.68592   2
  -3  13   3 5.51072 4.04238   7
  -3  13   3 10.5993 3.15772   6
   3  13  -3 5.87268 4.14576   1
  -3  13   3 11.0184 4.42276   1
   3  13  -3 5.02661 4.08961   3
   2 -13  -3 109.210 10.8630   4
  -2 -13   3 97.7682 10.5135   5
   2 -13  -3 84.0062 11.0520   7
  -2 -13   3 104.429 10.9750   4
   2 -13  -3 84.7167 9.23245   2
  -2 -13   3 96.3018 11.9022   7
  -2 -13   3 95.1420 10.0044   2
   2  13  -3 86.7069 9.30930   3
  -2  13   3 74.6657 9.56616   1
  -2  13   3 73.2066 8.42228   6
   2  13  -3 87.1807 10.0808   1
  -2  13   3 83.3699 10.4448   7
   1 -13  -3 10.2810 5.00526   5
  -1 -13   3 11.6860 4.29885   2
   1 -13  -3 13.6970 5.39509   7
   1 -13  -3 13.9687 4.65083   4
  -1 -13   3 13.0305 4.92465   4
   1 -13  -3 14.3742 4.42771   2
  -1 -13   3 10.6673 4.63632   5
  -1 -13   3 10.8573 4.87008   7
   1  13  -3 11.7284 4.33068   1
  -1  13   3 21.4235 4.81493   1
   1  13  -3 12.4618 3.57900   3
  -1  13   3 13.8841 5.05725   7
   0 -13   3 14.5986 5.58789   7
   0 -13  -3 21.7232 5.47523   5
   0 -13  -3 20.7895 5.40141   4
   0 -13   3 27.7044 5.72054   5
   0 -13  -3 8.68900 5.10252   7
   0 -13  -3 22.7193 4.98765   2
   0 -13   3 12.5100 4.48153   2
   0 -13   3 21.7419 5.34717   4
   0  13   3 21.3154 5.40736   1
   0  13   3 11.8145 5.05918   7
   0  13  -3 20.4489 5.03591   1
   0  13   3 23.2730 4.15183   3
  -1 -13  -3 47.9093 7.22277   5
   1 -13   3 37.0917 7.33922   7
  -1 -13  -3 37.6466 6.43707   4
  -1 -13  -3 40.4838 7.61114   7
   1 -13   3 28.7607 5.72543   2
  -1 -13  -3 24.9494 5.63099   2
   1 -13   3 35.8710 6.61090   4
   1  13   3 41.0301 5.91622   3
  -1  13  -3 26.9022 5.93743   1
   1  13   3 31.2735 6.57805   7
   1  13   3 32.4601 5.74633   1
   2 -13   3 61.8434 9.17479   7
   2 -13   3 61.4259 8.16766   2
  -2 -13  -3 63.0019 8.11601   2
   2 -13   3 55.4434 7.59646   4
  -2 -13  -3 55.7572 8.56495   7
  -2 -13  -3 51.3203 7.82102   5
  -2 -13  -3 57.3903 8.16004   4
   2  13   3 51.7260 7.83245   1
   2  13   3 51.3134 8.47241   7
   2  13   3 59.2188 7.37305   3
  -2  13  -3 47.3135 7.03945   1
  -3 -13  -3 4.15626 4.02252   5
  -3 -13  -3 7.59522 4.03679   4
  -3 -13  -3 7.89909 4.46400   7
   3 -13   3 6.35482 3.63938   2
   3 -13   3 6.92117 4.03309   4
  -3 -13  -3 9.81580 4.39118   2
   3 -13   3 6.56873 4.30140   7
   3  13   3 2.98739 3.85866   7
   3  13   3 6.85119 4.27110   3
  -3  13  -3 1.75147 3.65660   1
   3  13   3 14.7222 4.63998   1
  -4 -13  -3 26.8452 5.68214   7
  -4 -13  -3 17.9352 4.93112   5
  -4 -13  -3 17.9459 5.23612   4
  -4 -13  -3 22.1053 5.46332   2
   4 -13   3 13.1764 4.17520   4
   4 -13   3 19.5836 4.88095   2
  -4  13  -3 17.2813 4.87929   1
   4  13   3 14.7360 5.03141   1
   4  13   3 12.5348 5.50552   3
   5 -13   3 12.2924 4.48423   2
  -5 -13  -3 16.5335 4.64689   7
  -5 -13  -3 13.2240 4.72643   2
  -5 -13  -3 18.5020 4.60826   5
  -5 -13  -3 15.1771 4.60686   4
  -5  13  -3 16.1552 4.74676   1
   5  13   3 21.4254 5.80691   3
  -6 -13  -3 20.2748 4.95099   4
  -6 -13  -3 18.1023 5.52124   2
  -6 -13  -3 26.1413 5.19544   7
  -6 -13  -3 24.0619 5.12063   5
   6  13   3 23.3780 6.06020   3
  -6  13  -3 21.9392 5.09180   1
  -7 -13  -3 1.80350 2.96778   5
  -7 -13  -3 -0.0741 3.02456   7
  -7 -13  -3 3.03646 3.93163   2
   7  13   3 -0.4208 3.93791   3
  -7  13  -3 4.56599 4.33978   1
  -6 -14   3 5.13762 4.33250   2
  -6 -14   3 9.08339 4.00653   5
  -6 -14   3 2.48570 3.78427   7
  -6 -14   3 5.82691 3.81225   4
  -6  14   3 12.5316 4.43324   1
   6  14  -3 4.01484 4.35561   3
  -5 -14   3 1.13141 3.78653   2
  -5 -14   3 6.95680 4.27139   5
  -5 -14   3 3.04547 4.05514   4
  -5 -14   3 3.82069 4.15064   7
   5  14  -3 1.84667 4.34480   3
  -5  14   3 1.46566 3.98400   1
  -4 -14   3 11.6219 4.65429   4
   4 -14  -3 13.7181 5.08274   7
  -4 -14   3 11.0463 4.92880   5
   4 -14  -3 15.8007 4.01028   2
   4 -14  -3 20.4150 4.86598   4
  -4 -14   3 19.7412 5.25096   2
  -4 -14   3 25.2234 5.95122   7
  -4  14   3 20.5767 5.43527   1
   4  14  -3 18.4041 5.58206   3
  -4  14   3 11.1494 4.68011   7
   3 -14  -3 7.25003 4.88326   7
  -3 -14   3 11.4472 4.56076   5
  -3 -14   3 12.4832 5.10762   4
   3 -14  -3 18.3250 4.69617   2
  -3 -14   3 10.5183 4.93222   7
   3 -14  -3 17.2049 5.10502   4
  -3 -14   3 21.5521 5.10985   2
  -3  14   3 15.9745 3.56918   6
  -3  14   3 4.06143 4.10900   1
  -3  14   3 12.6580 4.76910   7
   3  14  -3 17.2192 4.82244   3
   3  14  -3 8.50462 4.79975   1
   2 -14  -3 56.7719 8.18878   4
   2 -14  -3 61.8719 7.68959   2
  -2 -14   3 55.2297 8.03311   2
  -2 -14   3 58.3491 9.00876   7
  -2 -14   3 58.9529 8.37619   4
  -2 -14   3 43.4674 7.71583   5
   2 -14  -3 37.4013 8.02288   7
   2  14  -3 82.0150 9.26574   1
  -2  14   3 63.9379 7.26469   6
   2  14  -3 71.9786 7.67856   3
  -2  14   3 66.2758 9.25794   7
  -2  14   3 82.0141 8.91036   1
  -1 -14   3 7.69057 4.23372   5
  -1 -14   3 6.52707 4.53959   4
  -1 -14   3 3.01264 4.14828   7
   1 -14  -3 10.7446 4.52058   4
   1 -14  -3 5.34053 4.08232   2
   1 -14  -3 6.22492 4.69770   7
  -1 -14   3 10.2074 4.25442   2
  -1  14   3 14.3712 4.48959   1
  -1  14   3 14.7199 5.11784   7
   1  14  -3 16.3451 4.61712   1
   0 -14   3 87.2648 11.4844   7
   0 -14  -3 97.7838 10.9665   4
   0 -14  -3 109.620 12.7567   7
   0 -14   3 99.8419 10.9173   4
   0 -14   3 104.287 10.5673   2
   0 -14  -3 91.9179 10.2558   2
   0 -14  -3 95.6286 10.8976   5
   0  14  -3 93.8387 10.2039   1
   0  14   3 82.9784 10.8458   7
   0  14   3 84.4493 10.0821   1
   1 -14   3 14.1279 5.69569   7
  -1 -14  -3 20.1655 5.40549   5
  -1 -14  -3 19.0252 5.44128   4
   1 -14   3 20.7315 5.42473   4
  -1 -14  -3 23.3090 5.27638   2
  -1 -14  -3 31.9780 6.52699   7
   1 -14   3 19.9741 4.78718   2
   1  14   3 18.8725 5.04862   1
   1  14   3 15.6209 4.26331   3
   1  14   3 13.4247 5.02983   7
  -1  14  -3 16.8712 4.98253   1
   2 -14   3 29.1417 5.85432   4
  -2 -14  -3 37.8612 6.30750   2
  -2 -14  -3 20.7449 5.44468   5
   2 -14   3 16.5593 5.18462   2
   2 -14   3 18.5899 6.07220   7
  -2 -14  -3 17.0770 5.18939   4
  -2 -14  -3 34.7725 7.53470   7
   2  14   3 24.6757 5.22445   3
  -2  14  -3 26.0058 5.49317   1
   2  14   3 31.3064 6.03303   1
   2  14   3 34.1271 6.75232   7
  -3 -14  -3 32.0319 6.15484   5
   3 -14   3 37.3563 7.20162   7
  -3 -14  -3 29.5740 5.77113   2
  -3 -14  -3 44.1041 7.83186   7
  -3 -14  -3 27.7376 5.78174   4
   3 -14   3 27.9610 5.67720   4
   3 -14   3 33.2745 6.00294   2
   3  14   3 31.4296 6.12708   3
[truncated: 1,567,755 more chars]
