# Supplementary material for: Controlling Pd(iv) reductive elimination pathways enables Pd(ii)-catalysed enantioselective C(sp3)−H fluorination
Source: Springer Nature journal article supplement (doi:10.1038/s41557-018-0048-1), 2018-06-08
Supplement: 41557_2018_48_MOESM292_ESM.mol [file 41557_2018_48_MOESM292_ESM.mol]

nchem.17061263C-comp6.mol
  ChemDraw03211811282D

 26 27  0  0  1  0  0  0  0  0999 V2000
   -1.7864   -0.4125    0.0000 C   0  0  0  0  0  0  0  0  0  0  0  0
   -1.7864   -1.2375    0.0000 C   0  0  0  0  0  0  0  0  0  0  0  0
   -1.0719   -1.6500    0.0000 C   0  0  0  0  0  0  0  0  0  0  0  0
   -0.3574   -1.2375    0.0000 C   0  0  0  0  0  0  0  0  0  0  0  0
   -0.3574   -0.4125    0.0000 C   0  0  0  0  0  0  0  0  0  0  0  0
   -1.0719    0.0000    0.0000 C   0  0  0  0  0  0  0  0  0  0  0  0
    0.3572    0.0000    0.0000 C   0  0  0  0  0  0  0  0  0  0  0  0
    0.3572    0.8250    0.0000 N   0  0  0  0  0  0  0  0  0  0  0  0
    0.3572   -1.6500    0.0000 C   0  0  0  0  0  0  0  0  0  0  0  0
    1.0716   -0.4125    0.0000 O   0  0  0  0  0  0  0  0  0  0  0  0
    1.0717    1.2375    0.0000 C   0  0  0  0  0  0  0  0  0  0  0  0
    1.7861    0.8250    0.0000 C   0  0  0  0  0  0  0  0  0  0  0  0
    2.5006    1.2375    0.0000 C   0  0  0  0  0  0  0  0  0  0  0  0
    2.5006    2.0625    0.0000 C   0  0  0  0  0  0  0  0  0  0  0  0
    1.7861    2.4750    0.0000 C   0  0  0  0  0  0  0  0  0  0  0  0
    1.0717    2.0625    0.0000 C   0  0  0  0  0  0  0  0  0  0  0  0
    3.2151    2.4750    0.0000 Br  0  0  0  0  0  0  0  0  0  0  0  0
    0.3572   -2.4750    0.0000 C   0  0  0  0  0  0  0  0  0  0  0  0
   -2.5005    0.0000    0.0000 C   0  0  0  0  0  0  0  0  0  0  0  0
   -2.0880    0.7145    0.0000 F   0  0  0  0  0  0  0  0  0  0  0  0
   -3.2151    0.4125    0.0000 F   0  0  0  0  0  0  0  0  0  0  0  0
   -2.9130   -0.7145    0.0000 F   0  0  0  0  0  0  0  0  0  0  0  0
    1.0716   -1.2375    0.0000 O   0  0  0  0  0  0  0  0  0  0  0  0
    1.7861   -2.4750    0.0000 O   0  0  0  0  0  0  0  0  0  0  0  0
    1.7861   -1.6500    0.0000 C   0  0  0  0  0  0  0  0  0  0  0  0
    2.5006   -1.2375    0.0000 C   0  0  0  0  0  0  0  0  0  0  0  0
  9 18  1  0      
 19 20  1  0      
 19 21  1  0      
 19 22  1  0      
  1 19  1  0      
 25 26  1  0      
 24 25  2  0      
 23 25  1  0      
  9 23  1  1      
  1  2  2  0      
  2  3  1  0      
  3  4  2  0      
  4  5  1  0      
  5  6  2  0      
  6  1  1  0      
  5  7  1  0      
  4  9  1  0      
  7 10  2  0      
  8  7  1  0      
  8 11  1  0      
 11 12  2  0      
 12 13  1  0      
 13 14  2  0      
 14 15  1  0      
 15 16  2  0      
 16 11  1  0      
 14 17  1  0      
M  STY  1   1 SUP
M  SLB  1   1   1
M  SAL   1  1  18
M  SBL   1  1   1
M  SMT   1 Me
M  SBV   1   1    0.0000    0.8250
M  STY  1   2 SUP
M  SLB  1   2   2
M  SAL   2  4  19  20  21  22
M  SBL   2  1   5
M  SMT   2 ^CF3
M  SBV   2   5    0.7141   -0.4125
M  STY  1   3 SUP
M  SLB  1   3   3
M  SAL   3  4  23  24  25  26
M  SBL   3  1   9
M  SMT   3 OAc
M  SBV   3   9   -0.7145   -0.4125
M  END
